# Supplementary material for: Ethanol-Induced Behavioral Sensitization Alters the Synaptic Transcriptome and Exon Utilization in DBA/2J Mice
Source: Front Genet. 2018 Sep 24;9:402. doi: 10.3389/fgene.2018.00402 (PMC6166094; doi:10.3389/fgene.2018.00402)
Supplement: TABLE S7 — EEP_SSP or SEP_SSP regulated genes (RNA-Seq, edgeR, FDR = 0.1), ToppFun functional enrichment analysis summary. [file Table_7.xlsx]

## Sheet: Table S7
Supplemental Table S7: EEP_SSP or SEP_SSP Regulated Genes (RNA-Seq, edgeR, FDR≤0.1), ToppFun Functional Enrichment Analysis Summary
EEP_SSP: Gene List			EEP_SSP: ToppFun Analysis												SEP_SSP: Gene List			SEP_SSP: ToppFun Analysis
Gene Symbol	FDR		Category	ID	Name	Source	p-value	q-value Bonferroni	q-value FDR B&H	q-value FDR B&Y	Hit Count in Query List	Hit Count in Genome	Hit in Query List		Gene Symbol	FDR		Category	ID	Name	Source	p-value	q-value Bonferroni	q-value FDR B&H	q-value FDR B&Y	Hit Count in Query List	Hit Count in Genome	Hit in Query List
Sept6	0.0893949		GO: Molecular Function	GO:0051082	unfolded protein binding		5.041e-05	0.06805	0.06168	0.4802	14	103	MKKS,CHAF1B,TUBB4B,DNAJA4,CDC37L1,PTGES3,SRSF10,SPG7,TMEM67,HSP90B1,PFDN1,PFDN2,DNAJA1,HSPA5		0610040J01Rik	0.0690697		GO: Molecular Function	GO:0004499	N,N-dimethylaniline monooxygenase activity		7.267e-05	0.07049	0.03684	0.2747	3	5	FMO1,FMO2,FMO5
0610011F06Rik	0.0879586		GO: Molecular Function	GO:0016655	oxidoreductase activity, acting on NAD(P)H, quinone or similar compound as acceptor		0.0001058	0.1429	0.06168	0.4802	10	60	NDUFA1,NDUFA2,NDUFA3,NDUFA5,NDUFA6,NDUFB7,NDUFS6,CBR1,CRYZL1,NDUFA13		1810041L15Rik	0.0863286		GO: Molecular Function	GO:0005251	delayed rectifier potassium channel activity		7.597e-05	0.07369	0.03684	0.2747	6	37	KCNA6,KCNC4,KCND1,KCNF1,KCNH1,KCNS2
0610031J06Rik	0.0982952		GO: Molecular Function	GO:0003924	GTPase activity		0.000167	0.2254	0.06168	0.4802	22	236	LRRK2,TUBA1B,TUBB3,TUBB4A,TUBB4B,ARL4D,RND3,RAB21,TUBA8,GNAQ,ATL2,GNG3,TUBA4A,TUBB2A,RAB33A,RAB28,RNF112,DNM1,RAB27B,RAC3,ADSSL1,TUBD1		2810403A07Rik	0.0942785		GO: Molecular Function	GO:0004435	phosphatidylinositol phospholipase C activity		0.0001914	0.1856	0.06188	0.4613	5	28	CHRM3,PLCL2,EDNRA,CCKBR,PLCE1
1810055G02Rik	0.0136256		GO: Molecular Function	GO:0015077	monovalent inorganic cation transmembrane transporter activity		0.0001963	0.265	0.06168	0.4802	30	375	ASIC1,SLC24A3,KCNIP3,SCN9A,SLC5A3,SLC8A2,OAZ3,ATP5F1E,ATP5ME,ATP5PF,ATP6V1G2,ABCC8,UQCR11,KCNH4,SLC24A5,SLC5A7,ATP6V1F,UQCR10,COX6A1,COX6B1,COX6C,COX8A,ATP6V0E2,TRPM4,KCNK4,KCND1,KCNH1,KCNN2,SLC17A7,HCN4		2810459M11Rik	1.27283e-05		GO: Molecular Function	GO:0004629	phospholipase C activity		0.0007346	0.7126	0.15	1	5	37	CHRM3,PLCL2,EDNRA,CCKBR,PLCE1
2010107E04Rik	0.0630565		GO: Molecular Function	GO:0008324	cation transmembrane transporter activity		0.0002603	0.3514	0.06168	0.4802	44	642	ASIC1,SLC24A3,KCNIP3,SCN9A,ORAI2,SLC5A3,SLC8A2,ATOX1,OAZ3,ATP5F1E,ATP5ME,ATP5PF,ATP6V1G2,ABCC8,UQCR11,SLC38A3,KCNH4,OPRM1,SLC7A8,P2RX4,SLC2A6,SLC24A5,SLC5A7,ATP6V1F,UQCR10,CHRNA4,SLC2A8,COX6A1,COX6B1,COX6C,COX8A,ATP6V0E2,TRPM4,PIEZO1,SLC30A3,PQLC2,KCNK4,KCND1,KCNH1,KCNN2,SLC17A7,SLC35A5,HCN4,SLC25A15		3010026O09Rik	0.0888426		GO: Molecular Function	GO:0042578	phosphoric ester hydrolase activity		0.0008715	0.8453	0.15	1	19	429	CHRM3,PTPN7,PTPRN2,PTPRR,PLCL2,PLD1,PPP4R1,DUSP18,EXO5,NT5E,DUSP1,DCLRE1B,EDNRA,CCKBR,NT5DC2,NT5C2,ATP1A1,PPTC7,PLCE1
2210016F16Rik	0.0113474		GO: Molecular Function	GO:0050136	NADH dehydrogenase (quinone) activity		0.0003822	0.516	0.06168	0.4802	8	46	NDUFA1,NDUFA2,NDUFA3,NDUFA5,NDUFA6,NDUFB7,NDUFS6,NDUFA13		3110047P20Rik	0.0345316		GO: Molecular Function	GO:0051015	actin filament binding		0.00119	1	0.15	1	9	132	IQGAP2,MTSS1,AIF1L,SVIL,CACNB2,LASP1,LCP1,PKNOX2,CORO1A
2410002F23Rik	0.0306653		GO: Molecular Function	GO:0003954	NADH dehydrogenase activity		0.0003822	0.516	0.06168	0.4802	8	46	NDUFA1,NDUFA2,NDUFA3,NDUFA5,NDUFA6,NDUFB7,NDUFS6,NDUFA13		5031439G07Rik	0.0699409		GO: Molecular Function	GO:0016709	oxidoreductase activity, acting on paired donors, with incorporation or reduction of molecular oxygen, NAD(P)H as one donor, and incorporation of one atom of oxygen		0.001323	1	0.15	1	5	42	MSMO1,CYP4V2,FMO1,FMO2,FMO5
2410006H16Rik	0.0178419		GO: Molecular Function	GO:0008137	NADH dehydrogenase (ubiquinone) activity		0.0003822	0.516	0.06168	0.4802	8	46	NDUFA1,NDUFA2,NDUFA3,NDUFA5,NDUFA6,NDUFB7,NDUFS6,NDUFA13		9430038I01Rik	0.00453127		GO: Molecular Function	GO:0048365	Rac GTPase binding		0.001323	1	0.15	1	5	42	IQGAP2,SRGAP3,RALBP1,WASF1,MTSS1L
2410015M20Rik	0.0592207		GO: Molecular Function	GO:0004499	N,N-dimethylaniline monooxygenase activity		0.0005711	0.771	0.06168	0.4802	3	5	FMO1,FMO2,FMO5		A930017M01Rik	0.0713958		GO: Molecular Function	GO:0001653	peptide receptor activity		0.001393	1	0.15	1	9	135	MAS1,MC2R,NTSR2,SSTR2,NMBR,CRHR1,EDNRA,CCKBR,CX3CR1
2610203C20Rik	0.0500099		GO: Molecular Function	GO:0016531	copper chaperone activity		0.0005711	0.771	0.06168	0.4802	3	5	ATOX1,CCS,COX17		Aass	0.0389691		GO: Molecular Function	GO:0003785	actin monomer binding		0.001546	1	0.15	1	4	26	MTSS1,PKNOX2,CORO1A,MTSS1L
2810428I15Rik	0.0892896		GO: Molecular Function	GO:0016462	pyrophosphatase activity		0.000588	0.7938	0.06168	0.4802	52	827	LRRK2,MCM5,ABCA9,TUBA1B,TUBB3,TUBB4A,TUBB4B,IPO8,DCTN2,MYH7B,NUDT16L1,DDX27,ARL4D,RND3,DYNLL1,RAB21,ATP5F1E,ATP5ME,ATP5PF,ATP6V1G2,RNGTT,SPG7,MYO1D,TUBA8,ABCC8,GNAQ,ATL2,GNG3,ATP6V1F,TUBA4A,TUBB2A,RAB33A,RAB28,PIN1,DHX29,HSPA5,IGHMBP2,ATP6V0E2,EIF4A3,RNF112,DHX15,NUDT12,ADPRM,KIF5B,DNM1,DYNC1H1,RAB27B,DYNC1I1,RAC3,ADSSL1,LONRF3,TUBD1		Abca9	0.0140487		GO: Molecular Function	GO:0019838	growth factor binding		0.001976	1	0.1742	1	9	142	ERBB3,HTRA1,FGFRL1,PXDN,NOV,COL4A1,DUSP1,IGF1R,IL6R
2810454H06Rik	0.0884049		GO: Molecular Function	GO:0016818	hydrolase activity, acting on acid anhydrides, in phosphorus-containing anhydrides		0.0006213	0.8387	0.06168	0.4802	52	829	LRRK2,MCM5,ABCA9,TUBA1B,TUBB3,TUBB4A,TUBB4B,IPO8,DCTN2,MYH7B,NUDT16L1,DDX27,ARL4D,RND3,DYNLL1,RAB21,ATP5F1E,ATP5ME,ATP5PF,ATP6V1G2,RNGTT,SPG7,MYO1D,TUBA8,ABCC8,GNAQ,ATL2,GNG3,ATP6V1F,TUBA4A,TUBB2A,RAB33A,RAB28,PIN1,DHX29,HSPA5,IGHMBP2,ATP6V0E2,EIF4A3,RNF112,DHX15,NUDT12,ADPRM,KIF5B,DNM1,DYNC1H1,RAB27B,DYNC1I1,RAC3,ADSSL1,LONRF3,TUBD1		Acap2	0.0496292		GO: Molecular Function	GO:0008253	5'-nucleotidase activity		0.002319	1	0.1875	1	3	14	NT5E,NT5DC2,NT5C2
3010026O09Rik	0.0446673		GO: Molecular Function	GO:0016817	hydrolase activity, acting on acid anhydrides		0.0006385	0.862	0.06168	0.4802	52	830	LRRK2,MCM5,ABCA9,TUBA1B,TUBB3,TUBB4A,TUBB4B,IPO8,DCTN2,MYH7B,NUDT16L1,DDX27,ARL4D,RND3,DYNLL1,RAB21,ATP5F1E,ATP5ME,ATP5PF,ATP6V1G2,RNGTT,SPG7,MYO1D,TUBA8,ABCC8,GNAQ,ATL2,GNG3,ATP6V1F,TUBA4A,TUBB2A,RAB33A,RAB28,PIN1,DHX29,HSPA5,IGHMBP2,ATP6V0E2,EIF4A3,RNF112,DHX15,NUDT12,ADPRM,KIF5B,DNM1,DYNC1H1,RAB27B,DYNC1I1,RAC3,ADSSL1,LONRF3,TUBD1		Acsl3	0.0839019		GO: Molecular Function	GO:0001965	G-protein alpha-subunit binding		0.003801	1	0.2124	1	4	33	RGS19,HTR1A,CRHR1,IGF1R
6430571L13Rik	0.0884049		GO: Molecular Function	GO:0015075	ion transmembrane transporter activity		0.0006799	0.9178	0.06168	0.4802	54	873	ASIC1,SLC24A3,KCNIP3,SCN9A,LRRC8C,ORAI2,SLC5A3,SLC8A2,ATOX1,OAZ3,ATP5F1E,ATP5ME,ATP5PF,ATP6V1G2,FXYD7,SLCO1C1,ABCC8,UQCR11,SLC38A3,CLIC6,KCNH4,OPRM1,SLC7A8,P2RX4,SLC2A6,SLC24A5,SLC5A7,ATP6V1F,UQCR10,CHRNA4,SLC38A2,SLC2A8,COX6A1,COX6B1,COX6C,COX8A,ATP6V0E2,SLC25A10,TRPM4,SLC22A23,PIEZO1,SLC35B2,SLC30A3,PQLC2,KCNK4,KCND1,KCNH1,KCNN2,SLC17A7,DLG1,SLC35A5,HCN4,LRRC8D,SLC25A15		Adamts1	0.0207059		GO: Molecular Function	GO:0050997	quaternary ammonium group binding		0.004063	1	0.2124	1	5	54	CHKA,CHRM3,CHRNA4,CHRNA7,GPR12
9230110C19Rik	0.0717683		GO: Molecular Function	GO:0008376	acetylgalactosaminyltransferase activity		0.0006854	0.9253	0.06168	0.4802	10	75	EXTL2,POMGNT1,PIGZ,FUT11,GLT8D1,GALNT1,B4GALNT4,B4GALT7,B4GALT5,POGLUT1		Adamts20	0.00161985		GO: Molecular Function	GO:0008252	nucleotidase activity		0.004148	1	0.2124	1	3	17	NT5E,NT5DC2,NT5C2
9330133O14Rik	0.0814652		GO: Molecular Function	GO:0005525	GTP binding		0.001056	1	0.08315	0.6474	28	378	LRRK2,TUBA1B,TUBB3,TUBB4A,TUBB4B,AK4,ARL4D,RND3,RASL11B,RAB21,RNGTT,TUBA8,SEPT6,GNAQ,ATL2,GUCY2C,TUBA4A,TUBB2A,RAB33A,RAB28,RHOV,DIRAS2,RNF112,DNM1,RAB27B,RAC3,ADSSL1,TUBD1		Adcy8	0.0109665		GO: Molecular Function	GO:0005216	ion channel activity		0.004447	1	0.2124	1	17	424	CHRNA4,CHRNA7,KCNA6,KCNC4,KCND1,KCNF1,KCNH1,KCNN2,SLC17A7,KCNS2,LRRC8C,CACNB2,RASA3,CLIC6,ANO10,LRRC8D,SLC4A11
9330159F19Rik	0.0679485		GO: Molecular Function	GO:0016530	metallochaperone activity		0.001109	1	0.08315	0.6474	3	6	ATOX1,CCS,COX17		Adipor2	0.0012541		GO: Molecular Function	GO:0008528	G-protein coupled peptide receptor activity		0.004544	1	0.2124	1	8	132	MAS1,MC2R,NTSR2,SSTR2,NMBR,EDNRA,CCKBR,CX3CR1
A730098P11Rik	0.00587948		GO: Molecular Function	GO:0019871	sodium channel inhibitor activity		0.001109	1	0.08315	0.6474	3	6	NEDD4,COMMD1,PCSK9		Aff1	0.0117163		GO: Molecular Function	GO:0070405	ammonium ion binding		0.004564	1	0.2124	1	6	79	CHKA,CHRM3,CHRNA4,CHRNA7,GPR12,HTR1A
Aacs	0.0893949		GO: Molecular Function	GO:0015078	proton transmembrane transporter activity		0.001197	1	0.08336	0.649	12	109	ATP5F1E,ATP5ME,ATP5PF,ATP6V1G2,UQCR11,ATP6V1F,UQCR10,COX6A1,COX6B1,COX6C,COX8A,ATP6V0E2		Agxt2l1	1.54461e-08		GO: Molecular Function	GO:0008144	drug binding		0.005431	1	0.2124	1	8	136	CHKA,CHRM3,CHRNA4,CHRNA7,FKBP5,HTR1A,PPARA,PPID
Aaed1	0.0688582		GO: Molecular Function	GO:0005536	glucose binding		0.001277	1	0.08336	0.649	4	13	HKDC1,HK1,UGP2,SLC2A8		Aif1l	0.0347934		GO: Molecular Function	GO:0035312	5'-3' exodeoxyribonuclease activity		0.005462	1	0.2124	1	2	6	EXO5,DCLRE1B
Aass	0.00363442		GO: Molecular Function	GO:0005200	structural constituent of cytoskeleton		0.001297	1	0.08336	0.649	12	110	ACTA1,ACTG1,TUBA1B,TUBB3,TUBB4A,TUBB4B,ACTL6B,TUBGCP2,TUBA8,TUBA4A,TUBB2A,TUBD1		Ak3	0.0195913		GO: Molecular Function	GO:0005225	volume-sensitive anion channel activity		0.005462	1	0.2124	1	2	6	LRRC8C,LRRC8D
Abca8a	0.0899964		GO: Molecular Function	GO:0019187	beta-1,4-mannosyltransferase activity		0.001656	1	0.09893	0.7702	8	57	POMGNT1,PIGZ,FUT11,GLT8D1,ALG1,B4GALT7,B4GALT5,POGLUT1		Akap1	0.0304998		GO: Molecular Function	GO:0016301	kinase activity		0.005567	1	0.2124	1	28	853	CDKN1A,ERBB3,NADK2,OBSCN,FGFRL1,CCND1,HUNK,CHKA,SGK3,PIK3C2A,KCNH1,TESK2,NME5,AK4,MERTK,MAP3K19,PAK5,LMTK2,CAMK1G,MAP3K6,EDNRA,IGF1R,NT5C2,PRKD1,FAM20A,MAP2K6,TRIB1,GAB1
Abca9	0.0466999		GO: Molecular Function	GO:0017111	nucleoside-triphosphatase activity		0.001685	1	0.09893	0.7702	48	785	LRRK2,MCM5,ABCA9,TUBA1B,TUBB3,TUBB4A,TUBB4B,IPO8,DCTN2,MYH7B,DDX27,ARL4D,RND3,DYNLL1,RAB21,ATP5F1E,ATP5ME,ATP5PF,ATP6V1G2,SPG7,MYO1D,TUBA8,ABCC8,GNAQ,ATL2,GNG3,ATP6V1F,TUBA4A,TUBB2A,RAB33A,RAB28,PIN1,DHX29,HSPA5,IGHMBP2,ATP6V0E2,EIF4A3,RNF112,DHX15,KIF5B,DNM1,DYNC1H1,RAB27B,DYNC1I1,RAC3,ADSSL1,LONRF3,TUBD1		Aldh1a2	0.0984975		GO: Molecular Function	GO:0042562	hormone binding		0.005807	1	0.2124	1	6	83	MAS1,ADIPOR2,CRHBP,CRHR1,IGF1R,ATP1A1
Abcc8	0.0557009		GO: Molecular Function	GO:0003735	structural constituent of ribosome		0.00227	1	0.1258	0.9794	18	216	RPL32,RPL36AL,RPL38,RPL39,RPL41,RPLP1,RPS2,RPS11,RPS15,RPS21,RPS25,MRPS18B,MRPS21,SLC25A10,MRPL52,MRPL2,SLC25A15,RPL19		Alg5	0.0379479		GO: Molecular Function	GO:0016298	lipase activity		0.005922	1	0.2124	1	8	138	CHRM3,PLCL2,PLD1,PNPLA2,EDNRA,CCKBR,PAFAH1B3,PLCE1
Abhd16a	0.017934		GO: Molecular Function	GO:0032561	guanyl ribonucleotide binding		0.002338	1	0.1258	0.9794	28	399	LRRK2,TUBA1B,TUBB3,TUBB4A,TUBB4B,AK4,ARL4D,RND3,RASL11B,RAB21,RNGTT,TUBA8,SEPT6,GNAQ,ATL2,GUCY2C,TUBA4A,TUBB2A,RAB33A,RAB28,RHOV,DIRAS2,RNF112,DNM1,RAB27B,RAC3,ADSSL1,TUBD1		Alox12b	0.0946039		GO: Molecular Function	GO:0022836	gated channel activity		0.005999	1	0.2124	1	14	331	CHRNA4,CHRNA7,KCNA6,KCNC4,KCND1,KCNF1,KCNH1,KCNN2,SLC17A7,KCNS2,CACNB2,RASA3,CLIC6,ANO10
Abhd5	0.0306653		GO: Molecular Function	GO:0019001	guanyl nucleotide binding		0.002423	1	0.1258	0.9794	28	400	LRRK2,TUBA1B,TUBB3,TUBB4A,TUBB4B,AK4,ARL4D,RND3,RASL11B,RAB21,RNGTT,TUBA8,SEPT6,GNAQ,ATL2,GUCY2C,TUBA4A,TUBB2A,RAB33A,RAB28,RHOV,DIRAS2,RNF112,DNM1,RAB27B,RAC3,ADSSL1,TUBD1		Amigo2	0.0483563		GO: Molecular Function	GO:0022838	substrate-specific channel activity		0.006106	1	0.2124	1	17	438	CHRNA4,CHRNA7,KCNA6,KCNC4,KCND1,KCNF1,KCNH1,KCNN2,SLC17A7,KCNS2,LRRC8C,CACNB2,RASA3,CLIC6,ANO10,LRRC8D,SLC4A11
Abt1	0.0893949		GO: Molecular Function	GO:0004860	protein kinase inhibitor activity		0.002573	1	0.1286	1	10	89	TRIB2,HYAL2,GMFB,FLRT3,SH3BP5,DUSP19,DNAJC3,RTN4R,LRRTM3,SPRED1		Amot	0.032519		GO: Molecular Function	GO:0016247	channel regulator activity		0.006179	1	0.2124	1	8	139	CHRNA7,CNIH3,SGK3,PKP2,NPY,PCSK9,CACNB2,GRM2
Acta1	0.0535757		GO: Molecular Function	GO:0031072	heat shock protein binding		0.003022	1	0.136	1	11	106	DNAJA4,FGF1,FKBP5,CHORDC1,CDC37L1,PTGES3,MVD,NUP62,DNAJA1,PPID,ENO1		Ampd3	0.0171374		GO: Molecular Function	GO:0016773	phosphotransferase activity, alcohol group as acceptor		0.006236	1	0.2124	1	26	781	CDKN1A,ERBB3,NADK2,OBSCN,FGFRL1,CCND1,HUNK,CHKA,SGK3,PIK3C2A,KCNH1,TESK2,MERTK,MAP3K19,PAK5,LMTK2,CAMK1G,MAP3K6,EDNRA,IGF1R,NT5C2,PRKD1,FAM20A,MAP2K6,TRIB1,GAB1
Actg1	0.000141449		GO: Molecular Function	GO:0019210	kinase inhibitor activity		0.003032	1	0.136	1	10	91	TRIB2,HYAL2,GMFB,FLRT3,SH3BP5,DUSP19,DNAJC3,RTN4R,LRRTM3,SPRED1		Angel1	0.0348934		GO: Molecular Function	GO:0005246	calcium channel regulator activity		0.00635	1	0.2124	1	4	38	SGK3,NPY,CACNB2,GRM2
Actl6b	0.0841694		GO: Molecular Function	GO:0016798	hydrolase activity, acting on glycosyl bonds		0.003446	1	0.136	1	17	207	ADPRH,POMGNT1,PIGZ,FUT11,CHID1,OGA,HYAL2,GLT8D1,NEU2,DAGLA,DAGLB,CD38,B4GALT7,B4GALT5,KL,POGLUT1,MOGS		Ano10	0.0993416		GO: Molecular Function	GO:0005112	Notch binding		0.006658	1	0.2153	1	3	20	JAG1,NOTCH4,NOV
Adat3	0.0483671		GO: Molecular Function	GO:0004576	oligosaccharyl transferase activity		0.004228	1	0.136	1	8	66	POMGNT1,PIGZ,FUT11,GLT8D1,STT3B,B4GALT7,B4GALT5,POGLUT1		Apbb1ip	0.0287325		GO: Molecular Function	GO:0017048	Rho GTPase binding		0.007282	1	0.2255	1	6	87	CDC42EP4,IQGAP2,SRGAP3,RALBP1,WASF1,MTSS1L
Adprh	0.0653975		GO: Molecular Function	GO:0097016	L27 domain binding		0.004517	1	0.136	1	2	3	LIN7C,DLG1		Arhgap18	0.0247359		GO: Molecular Function	GO:0003779	actin binding		0.007647	1	0.2255	1	16	412	TPM3,SYNPO2,IQGAP2,MTSS1,AIF1L,SVIL,WASF1,MLPH,CACNB2,LASP1,LCP1,PKNOX2,CORO1A,CLMN,EMD,MTSS1L
Adprm	0.0941937		GO: Molecular Function	GO:0004727	prenylated protein tyrosine phosphatase activity		0.004517	1	0.136	1	2	3	PTP4A3,PTP4A2		Arrdc2	0.0234358		GO: Molecular Function	GO:0005261	cation channel activity		0.007672	1	0.2255	1	13	306	CHRNA4,CHRNA7,KCNA6,KCNC4,KCND1,KCNF1,KCNH1,KCNN2,KCNS2,CACNB2,RASA3,ANO10,SLC4A11
Adssl1	0.0882635		GO: Molecular Function	GO:0004416	hydroxyacylglutathione hydrolase activity		0.004517	1	0.136	1	2	3	HAGHL,HAGH		Atp1a1	0.0918958		GO: Molecular Function	GO:0015079	potassium ion transmembrane transporter activity		0.008226	1	0.2347	1	8	146	KCNA6,KCNC4,KCND1,KCNF1,KCNH1,KCNN2,KCNS2,ATP1A1
Agbl3	0.0893949		GO: Molecular Function	GO:0050816	phosphothreonine residue binding		0.004517	1	0.136	1	2	3	NEDD4,PIN1		Atp6ap1	0.0939385		GO: Molecular Function	GO:0008198	ferrous iron binding		0.008738	1	0.2422	1	3	22	CDO1,HEPH,NT5E
Agxt2l1	3.18307e-07		GO: Molecular Function	GO:0022890	inorganic cation transmembrane transporter activity		0.005171	1	0.136	1	34	542	ASIC1,SLC24A3,KCNIP3,SCN9A,ORAI2,SLC5A3,SLC8A2,ATOX1,OAZ3,ATP5F1E,ATP5ME,ATP5PF,ATP6V1G2,ABCC8,UQCR11,KCNH4,OPRM1,SLC24A5,SLC5A7,ATP6V1F,UQCR10,COX6A1,COX6B1,COX6C,COX8A,ATP6V0E2,TRPM4,SLC30A3,KCNK4,KCND1,KCNH1,KCNN2,SLC17A7,HCN4		Atp6v0e	0.0464281		GO: Molecular Function	GO:0005249	voltage-gated potassium channel activity		0.009009	1	0.2427	1	6	91	KCNA6,KCNC4,KCND1,KCNF1,KCNH1,KCNS2
Ahi1	0.0809012		GO: Molecular Function	GO:0019904	protein domain specific binding		0.005442	1	0.136	1	43	729	LIN7C,SHISA5,STX1B,BASP1,CRB3,CXXC4,DYNLL1,OAZ3,UNC13A,TRADD,SRSF10,RIPK1,MYO1D,TCEAL5,RIPK2,SSTR2,ARFIP1,NEDD4,LIN7B,BMI1,STX1A,GNG12,SYP,ANGEL1,OPRM1,CCNG1,TCEAL3,NUP62,CADM1,TCEAL6,DNAJA1,HSPA5,SH3BP5,CPE,XPO1,YWHAH,DIXDC1,PMEPA1,JAK2,TRIM11,KCNN2,DLG1,RAB27B		Azin1	0.0160688		GO: Biological Process	GO:0001655	urogenital system development		1.72e-07	0.0007311	0.0007311	0.00653	24	355	PCSK5,DLG5,ZBTB16,MTSS1,DACT2,HMGCS2,BMP2,ALDH1A2,GLI3,JAG1,SDC4,PCSK9,COL4A1,ADAMTS1,TNC,KLF15,ID4,LGR5,EDNRA,VANGL2,IGF1R,EGR1,DCHS1,PLCE1
AI413582	0.0679485		GO: Molecular Function	GO:0004553	hydrolase activity, hydrolyzing O-glycosyl compounds		0.005615	1	0.136	1	15	182	POMGNT1,PIGZ,FUT11,CHID1,OGA,HYAL2,GLT8D1,NEU2,DAGLA,DAGLB,B4GALT7,B4GALT5,KL,POGLUT1,MOGS		B3galt5	0.00910506		GO: Biological Process	GO:0072001	renal system development		9.429e-07	0.004007	0.002004	0.0179	21	309	PCSK5,DLG5,ZBTB16,MTSS1,DACT2,HMGCS2,BMP2,ALDH1A2,GLI3,JAG1,SDC4,PCSK9,COL4A1,ADAMTS1,KLF15,LGR5,EDNRA,VANGL2,EGR1,DCHS1,PLCE1
Aida	0.0900094		GO: Molecular Function	GO:0031434	mitogen-activated protein kinase kinase binding		0.005739	1	0.136	1	4	19	TRIB2,PIN1,DUSP19,DLG1		B4galt5	0.0929266		GO: Biological Process	GO:0001822	kidney development		5.58e-06	0.02372	0.006109	0.05456	19	291	PCSK5,DLG5,ZBTB16,MTSS1,DACT2,HMGCS2,BMP2,ALDH1A2,GLI3,JAG1,SDC4,PCSK9,ADAMTS1,KLF15,EDNRA,VANGL2,EGR1,DCHS1,PLCE1
Ak3	0.00677379		GO: Molecular Function	GO:0015368	calcium:cation antiporter activity		0.005911	1	0.136	1	3	10	SLC24A3,SLC8A2,SLC24A5		BC068157	0.0609979		GO: Biological Process	GO:0007264	small GTPase mediated signal transduction		6.09e-06	0.02588	0.006109	0.05456	29	588	CDKN1A,CDC42EP4,IQGAP2,RGS19,OBSCN,BCL6,RHOU,FARP2,PLEKHG1,RAB33A,SRGAP3,AMOT,RALBP1,RIN2,DHCR24,PLD1,WASF1,RASA3,EDNRA,VANGL2,CELSR1,RASA4,RASGEF1C,RASD1,RASL11B,PRKD1,ARHGAP18,DIRAS2,PLCE1
Aldoart1	0.036052		GO: Molecular Function	GO:0045140	inositol phosphoceramide synthase activity		0.006147	1	0.136	1	7	56	POMGNT1,PIGZ,FUT11,GLT8D1,B4GALT7,B4GALT5,POGLUT1		Bcl6	0.0664336		GO: Biological Process	GO:0045669	positive regulation of osteoblast differentiation		7.187e-06	0.03054	0.006109	0.05456	9	68	ATP6AP1,CEBPA,BMP2,GLI3,JAG1,ID4,PRKD1,IL6R,CD276
Alg1	0.0783716		GO: Molecular Function	GO:0016759	cellulose synthase activity		0.006147	1	0.136	1	7	56	POMGNT1,PIGZ,FUT11,GLT8D1,B4GALT7,B4GALT5,POGLUT1		Bin2	0.0337832		GO: Biological Process	GO:0010243	response to organonitrogen compound		2.076e-05	0.08821	0.0147	0.1313	36	866	CDKN1A,CDO1,IL18,ATP6AP1,INHBB,MAS1,CCND1,HMGCS2,SSTR2,EZH2,PTGS2,CHRNA4,ADCY8,CHRNA7,STXBP3,PIK3C2A,UCHL3,JAG1,PLD1,PCSK9,COL4A1,ATP6V0E1,FOSB,SLC25A33,DUSP1,KLF15,PPARA,CREM,CRHBP,CRHR1,EDNRA,CROT,IGF1R,EGR1,AKAP1,GAB1
Anapc13	0.0229709		GO: Molecular Function	GO:0052638	indole-3-butyrate beta-glucosyltransferase activity		0.006147	1	0.136	1	7	56	POMGNT1,PIGZ,FUT11,GLT8D1,B4GALT7,B4GALT5,POGLUT1		Bmp2	0.0664359		GO: Biological Process	GO:0045778	positive regulation of ossification		2.567e-05	0.1091	0.01509	0.1348	10	99	ZBTB16,ATP6AP1,CEBPA,BMP2,GLI3,JAG1,ID4,PRKD1,IL6R,CD276
Angel1	0.00717788		GO: Molecular Function	GO:0080062	cytokinin 9-beta-glucosyltransferase activity		0.006147	1	0.136	1	7	56	POMGNT1,PIGZ,FUT11,GLT8D1,B4GALT7,B4GALT5,POGLUT1		Cables1	0.00856412		GO: Biological Process	GO:1901652	response to peptide		2.841e-05	0.1208	0.01509	0.1348	24	477	CDO1,IL18,ATP6AP1,INHBB,MAS1,HMGCS2,SSTR2,ADCY8,STXBP3,PIK3C2A,UCHL3,JAG1,PLD1,PCSK9,ATP6V0E1,SLC25A33,KLF15,PPARA,CRHBP,CRHR1,IGF1R,EGR1,AKAP1,GAB1
Ankrd13c	0.0939364		GO: Molecular Function	GO:0018717	9-phenanthrol glycosyltransferase activity		0.006147	1	0.136	1	7	56	POMGNT1,PIGZ,FUT11,GLT8D1,B4GALT7,B4GALT5,POGLUT1		Cacnb2	0.00916392		GO: Biological Process	GO:0043434	response to peptide hormone		7.168e-05	0.3046	0.03306	0.2953	22	442	CDO1,IL18,ATP6AP1,INHBB,MAS1,HMGCS2,SSTR2,ADCY8,STXBP3,PIK3C2A,UCHL3,PLD1,PCSK9,ATP6V0E1,SLC25A33,PPARA,CRHBP,CRHR1,IGF1R,EGR1,AKAP1,GAB1
Ankrd34a	0.0941937		GO: Molecular Function	GO:0018718	1,2-dihydroxy-phenanthrene glycosyltransferase activity		0.006147	1	0.136	1	7	56	POMGNT1,PIGZ,FUT11,GLT8D1,B4GALT7,B4GALT5,POGLUT1		Cadm3	0.0760318		GO: Biological Process	GO:0007156	homophilic cell adhesion via plasma membrane adhesion molecules		8.085e-05	0.3436	0.03306	0.2953	12	160	CADM3,FREM2,PTPRR,AMIGO2,PCDHGC5,PCDHGC4,PCDHGB3,PCDHGA4,L1CAM,CLSTN1,CELSR1,DCHS1
Ankrd45	0.0136256		GO: Molecular Function	GO:0052640	salicylic acid glucosyltransferase (glucoside-forming) activity		0.006147	1	0.136	1	7	56	POMGNT1,PIGZ,FUT11,GLT8D1,B4GALT7,B4GALT5,POGLUT1		Camk1g	3.11513e-05		GO: Biological Process	GO:0008285	negative regulation of cell proliferation		8.574e-05	0.3644	0.03306	0.2953	30	714	CDKN1A,DLG5,ZBTB16,CEBPA,GJB6,MTSS1,FGFRL1,BCL6,SSTR2,PTGS2,BMP2,ALDH1A2,PER2,KLF9,RALBP1,GLI3,DHCR24,PKP2,NOV,ADAMTS1,WNT9A,MXD4,HAVCR2,KLF13,CLMN,FRZB,PAX6,EMD,TRIB1,CD276
Anln	0.0171156		GO: Molecular Function	GO:0052757	chondroitin hydrolase activity		0.006147	1	0.136	1	7	56	POMGNT1,PIGZ,FUT11,GLT8D1,B4GALT7,B4GALT5,POGLUT1		Cbln4	0.0166673		GO: Biological Process	GO:0050804	modulation of chemical synaptic transmission		9.334e-05	0.3967	0.03306	0.2953	19	357	ZMYND8,PTGS2,CHRNA4,CHRNA7,CNIH3,PER2,KCNC4,PLCL2,SYP,WNT7A,GRM2,CLSTN1,CRHBP,CRHR1,CCKBR,CELSR1,EGR1,CD38,CX3CR1
Apcdd1	0.0972882		GO: Molecular Function	GO:0033931	endogalactosaminidase activity		0.006147	1	0.136	1	7	56	POMGNT1,PIGZ,FUT11,GLT8D1,B4GALT7,B4GALT5,POGLUT1		Cbwd1	0.0167675		GO: Biological Process	GO:1901698	response to nitrogen compound		0.0001217	0.5173	0.03979	0.3554	37	981	CDKN1A,CDO1,IL18,ATP6AP1,INHBB,MAS1,CCND1,HMGCS2,SSTR2,EZH2,CHRM3,PTGS2,CHRNA4,ADCY8,CHRNA7,STXBP3,PIK3C2A,UCHL3,JAG1,PLD1,PCSK9,COL4A1,ATP6V0E1,FOSB,SLC25A33,DUSP1,KLF15,PPARA,CREM,CRHBP,CRHR1,EDNRA,CROT,IGF1R,EGR1,AKAP1,GAB1
Aph1a	0.0275728		GO: Molecular Function	GO:0035496	lipopolysaccharide-1,5-galactosyltransferase activity		0.006147	1	0.136	1	7	56	POMGNT1,PIGZ,FUT11,GLT8D1,B4GALT7,B4GALT5,POGLUT1		Ccdc6	0.00207588		GO: Biological Process	GO:1901653	cellular response to peptide		0.0001518	0.645	0.04468	0.3991	18	340	IL18,ATP6AP1,INHBB,MAS1,HMGCS2,SSTR2,ADCY8,PIK3C2A,UCHL3,PCSK9,ATP6V0E1,SLC25A33,KLF15,CRHBP,CRHR1,IGF1R,AKAP1,GAB1
Arfip1	0.0942365		GO: Molecular Function	GO:0019112	phenanthrol glycosyltransferase activity		0.006147	1	0.136	1	7	56	POMGNT1,PIGZ,FUT11,GLT8D1,B4GALT7,B4GALT5,POGLUT1		Ccdc65	0.0931155		GO: Biological Process	GO:0043269	regulation of ion transport		0.0001577	0.6702	0.04468	0.3991	28	669	PTGS2,CHRNA4,CNIH3,SGK3,KCNA6,PER2,KCNC4,KCND1,PIK3C2A,KCNF1,KCNH1,KCNN2,PKP2,KCNS2,PCSK9,LRRC8C,CACNB2,HTR1A,CLIC6,LRRC8D,CRHBP,CRHR1,EDNRA,CORO1A,CNKSR3,PRKD1,ATP1A1,MAP2K6
Arhgap36	0.0814652		GO: Molecular Function	GO:0008921	lipopolysaccharide-1,6-galactosyltransferase activity		0.006147	1	0.136	1	7	56	POMGNT1,PIGZ,FUT11,GLT8D1,B4GALT7,B4GALT5,POGLUT1		Ccdc87	0.0138755		GO: Biological Process	GO:0023014	signal transduction by protein phosphorylation		0.0001756	0.7465	0.04666	0.4167	36	962	DOK5,ERBB3,IL18,ATP6AP1,INHBB,NTSR2,EZH2,CHRNA7,BMP2,PTPRR,KCNH1,FAM83D,TNFRSF19,ALOX12B,MAP3K19,DUSP18,RASA3,DUSP1,WNT7A,PAK5,MAP3K6,RGS3,EDNRA,CCKBR,VANGL2,HAVCR2,IGF1R,RASA4,CNKSR3,GLIPR2,MAP2K6,TRIB1,DIRAS2,IL6R,GAB1,PLCE1
Arhgef19	0.0982952		GO: Molecular Function	GO:0052639	salicylic acid glucosyltransferase (ester-forming) activity		0.006147	1	0.136	1	7	56	POMGNT1,PIGZ,FUT11,GLT8D1,B4GALT7,B4GALT5,POGLUT1		Cckbr	0.0192294		GO: Biological Process	GO:0098742	cell-cell adhesion via plasma-membrane adhesion molecules		0.0001989	0.8454	0.04947	0.4419	14	230	CADM3,FGFRL1,BMP2,FREM2,PTPRR,AMIGO2,PCDHGC5,PCDHGC4,PCDHGB3,PCDHGA4,L1CAM,CLSTN1,CELSR1,DCHS1
Arl6	0.0220718		GO: Molecular Function	GO:0052641	benzoic acid glucosyltransferase activity		0.006147	1	0.136	1	7	56	POMGNT1,PIGZ,FUT11,GLT8D1,B4GALT7,B4GALT5,POGLUT1		Ccnd1	0.000789959		GO: Biological Process	GO:0051270	regulation of cellular component movement		0.0002095	0.8905	0.04947	0.4419	33	860	ERBB3,IL18,SWAP70,BCL6,PTGS2,TMEFF2,SGK3,BMP2,PTPRR,SRGAP3,AMOT,JAG1,PKP2,SEMA6A,PLD1,SDC4,NOV,WNT7A,PRR5,S1PR1,EDNRA,CORO1A,IGF1R,EGR1,GLIPR2,PRKD1,PAX6,ATP1A1,ARHGAP18,TRIB1,IL6R,CX3CR1,GAB1
Arpp21	0.0897328		GO: Molecular Function	GO:0031278	alpha-1,2-galactosyltransferase activity		0.006147	1	0.136	1	7	56	POMGNT1,PIGZ,FUT11,GLT8D1,B4GALT7,B4GALT5,POGLUT1		Ccng1	0.000774196		GO: Biological Process	GO:2000145	regulation of cell motility		0.0002371	1	0.05175	0.4623	31	793	ERBB3,IL18,SWAP70,PTGS2,TMEFF2,SGK3,BMP2,PTPRR,SRGAP3,AMOT,JAG1,PKP2,SEMA6A,PLD1,SDC4,NOV,WNT7A,PRR5,S1PR1,EDNRA,CORO1A,IGF1R,EGR1,GLIPR2,PRKD1,PAX6,ARHGAP18,TRIB1,IL6R,CX3CR1,GAB1
Arrdc2	0.0680189		GO: Molecular Function	GO:0052824	dolichyl-pyrophosphate Man7GlcNAc2 alpha-1,6-mannosyltransferase activity		0.006147	1	0.136	1	7	56	POMGNT1,PIGZ,FUT11,GLT8D1,B4GALT7,B4GALT5,POGLUT1		Cd276	0.0609979		GO: Biological Process	GO:0098609	cell-cell adhesion		0.0002508	1	0.05175	0.4623	36	980	CADM3,DLG5,IL18,ZBTB16,SWAP70,FGFRL1,BCL6,KIRREL2,CHRNA7,BMP2,FREM2,STXBP3,PTPRR,GLI3,PKP2,APBB1IP,NOV,AMIGO2,PCDHGC5,PCDHGC4,PCDHGB3,NT5E,PCDHGA4,L1CAM,PRR5,PPARA,LCP1,CLSTN1,SOX13,LFNG,HAVCR2,CORO1A,CELSR1,EGR1,DCHS1,CD276
Arrdc3	0.0809012		GO: Molecular Function	GO:0033556	dolichyl pyrophosphate Man7GlcNAc2 alpha-1,3-glucosyltransferase activity		0.006147	1	0.136	1	7	56	POMGNT1,PIGZ,FUT11,GLT8D1,B4GALT7,B4GALT5,POGLUT1		Cd38	0.0267464		GO: Biological Process	GO:0071375	cellular response to peptide hormone stimulus		0.0002557	1	0.05175	0.4623	17	324	IL18,ATP6AP1,INHBB,MAS1,HMGCS2,SSTR2,ADCY8,PIK3C2A,UCHL3,PCSK9,ATP6V0E1,SLC25A33,CRHBP,CRHR1,IGF1R,AKAP1,GAB1
Arsg	0.0606622		GO: Molecular Function	GO:0018716	1-phenanthrol glycosyltransferase activity		0.006147	1	0.136	1	7	56	POMGNT1,PIGZ,FUT11,GLT8D1,B4GALT7,B4GALT5,POGLUT1		Cdc42ep4	0.00439293		GO: Biological Process	GO:0048839	inner ear development		0.0002835	1	0.05476	0.4891	13	210	CEBPA,GJB6,BMP2,FREM2,GLI3,JAG1,SDC4,LGR5,VANGL2,CELSR1,FRZB,DCHS1,FZD2
Arsk	0.0159859		GO: Molecular Function	GO:0008755	O antigen polymerase activity		0.006147	1	0.136	1	7	56	POMGNT1,PIGZ,FUT11,GLT8D1,B4GALT7,B4GALT5,POGLUT1		Cdh19	0.0920166		GO: Biological Process	GO:0048659	smooth muscle cell proliferation		0.0003082	1	0.05694	0.5086	10	133	IL18,PTGS2,RALBP1,NOV,S1PR1,EDNRA,IGF1R,EGR1,TRIB1,IL6R
Asic1	0.0557009		GO: Molecular Function	GO:0018715	9-phenanthrol UDP-glucuronosyltransferase activity		0.006147	1	0.136	1	7	56	POMGNT1,PIGZ,FUT11,GLT8D1,B4GALT7,B4GALT5,POGLUT1		Cdkn1a	3.4534e-09		GO: Biological Process	GO:0007423	sensory organ development		0.0003256	1	0.05765	0.5149	25	594	CEBPA,INHBB,GJB6,FJX1,NDP,BMP2,FREM2,ALDH1A2,SALL2,GLI3,UCHL3,JAG1,SLC17A7,MERTK,SDC4,COL4A1,WNT7A,WNT9A,LGR5,VANGL2,CELSR1,FRZB,DCHS1,PAX6,FZD2
Asnsd1	0.0679485		GO: Molecular Function	GO:0042283	dolichyl pyrophosphate Glc1Man9GlcNAc2 alpha-1,3-glucosyltransferase activity		0.006147	1	0.136	1	7	56	POMGNT1,PIGZ,FUT11,GLT8D1,B4GALT7,B4GALT5,POGLUT1		Cdo1	0.0566199		GO: Biological Process	GO:0007265	Ras protein signal transduction		0.0003513	1	0.05947	0.5312	17	333	CDKN1A,CDC42EP4,OBSCN,BCL6,RHOU,FARP2,PLEKHG1,DHCR24,PLD1,WASF1,RASA3,EDNRA,VANGL2,CELSR1,RASA4,PRKD1,PLCE1
Astn2	0.0783716		GO: Molecular Function	GO:0061631	ubiquitin conjugating enzyme activity		0.006747	1	0.1407	1	5	31	UBE2Q2,UBE2A,UBE2B,UBE2V1,UBE2J2		Cebpa	0.00274465		GO: Biological Process	GO:0097305	response to alcohol		0.0003729	1	0.05947	0.5312	19	398	CDKN1A,CDO1,INHBB,CCND1,HMGCS2,SSTR2,EZH2,PTGS2,CHRNA7,ALDH1A2,KLF9,ADAMTS1,TNC,FOSB,DUSP1,WNT7A,CRHBP,CRHR1,CD38
Atad3a	0.0756024		GO: Molecular Function	GO:0046921	alpha-(1->6)-fucosyltransferase activity		0.006776	1	0.1407	1	7	57	POMGNT1,PIGZ,FUT11,GLT8D1,B4GALT7,B4GALT5,POGLUT1		Celsr1	0.0310492		GO: Biological Process	GO:0030334	regulation of cell migration		0.0003778	1	0.05947	0.5312	29	742	IL18,SWAP70,PTGS2,TMEFF2,SGK3,BMP2,PTPRR,SRGAP3,AMOT,JAG1,PKP2,SEMA6A,PLD1,SDC4,NOV,WNT7A,PRR5,S1PR1,EDNRA,CORO1A,IGF1R,EGR1,GLIPR2,PRKD1,PAX6,TRIB1,IL6R,CX3CR1,GAB1
Atg12	0.0220718		GO: Molecular Function	GO:0000009	alpha-1,6-mannosyltransferase activity		0.006776	1	0.1407	1	7	57	POMGNT1,PIGZ,FUT11,GLT8D1,B4GALT7,B4GALT5,POGLUT1		Cep95	0.0332581		GO: Biological Process	GO:0030001	metal ion transport		0.000404	1	0.06132	0.5477	32	855	ATP6AP1,SLC10A7,PTGS2,CHRNA4,CHRNA7,HEPH,SGK3,SLC38A2,SLC8B1,KCNA6,KCNC4,KCND1,PIK3C2A,KCNF1,KCNH1,KCNN2,PKP2,SLC17A7,KCNS2,NPY,PCSK9,CACNB2,ATP6V0E1,RASA3,LMTK2,CRHR1,EDNRA,CORO1A,CNKSR3,PRKD1,ATP1A1,SLC4A11
Atl2	0.0860142		GO: Molecular Function	GO:0003980	UDP-glucose:glycoprotein glucosyltransferase activity		0.006776	1	0.1407	1	7	57	POMGNT1,PIGZ,FUT11,GLT8D1,B4GALT7,B4GALT5,POGLUT1		Cgnl1	0.0863286		GO: Biological Process	GO:0032870	cellular response to hormone stimulus		0.0004401	1	0.06449	0.5761	27	677	IL18,ATP6AP1,INHBB,MAS1,HMGCS2,SSTR2,ADCY8,PIK3C2A,KLF9,UCHL3,FHL2,ADIPOR2,PCSK9,ATP6V0E1,ADAMTS1,TNC,FOSB,SLC25A33,DUSP1,PAQR8,PPARA,CRHBP,CRHR1,IGF1R,ATP1A1,AKAP1,GAB1
Atox1	0.0416638		GO: Molecular Function	GO:0016651	oxidoreductase activity, acting on NAD(P)H		0.007325	1	0.1437	1	10	103	NDUFA1,NDUFA2,NDUFA3,NDUFA5,NDUFA6,NDUFB7,NDUFS6,CBR1,CRYZL1,NDUFA13		Chka	2.68639e-06		GO: Biological Process	GO:0055080	cation homeostasis		0.0004927	1	0.06979	0.6234	27	682	ATP6AP1,CYBRD1,SWAP70,MTSS1,CHRNA7,HEPH,SGK3,SLC8B1,SLC17A7,GPR12,ATP6V0E1,RASA3,CLSTN1,S1PR1,CRHR1,EDNRA,CCKBR,SLC7A8,CORO1A,TMEM203,CD38,PRKD1,ATP1A1,FAM20A,FZD2,SLC4A11,PLCE1
Atp5e	0.000342141		GO: Molecular Function	GO:0000026	alpha-1,2-mannosyltransferase activity		0.007451	1	0.1437	1	7	58	POMGNT1,PIGZ,FUT11,GLT8D1,B4GALT7,B4GALT5,POGLUT1		Chrm3	0.0515026		GO: Biological Process	GO:0007200	phospholipase C-activating G-protein coupled receptor signaling pathway		0.0005373	1	0.07277	0.65	8	94	NTSR2,CHRM3,NMBR,S1PR1,CRHR1,EDNRA,CCKBR,PLCE1
Atp5j	0.0662001		GO: Molecular Function	GO:0001962	alpha-1,3-galactosyltransferase activity		0.007451	1	0.1437	1	7	58	POMGNT1,PIGZ,FUT11,GLT8D1,B4GALT7,B4GALT5,POGLUT1		Chrna4	0.019901		GO: Biological Process	GO:0045444	fat cell differentiation		0.0005479	1	0.07277	0.65	13	225	ZBTB16,CEBPA,INHBB,CCND1,PTGS2,BMP2,PER2,UCHL3,JAG1,LRRC8C,ID4,TMEM120A,FRZB
Atp5k	5.90255e-06		GO: Molecular Function	GO:0042281	dolichyl pyrophosphate Man9GlcNAc2 alpha-1,3-glucosyltransferase activity		0.007451	1	0.1437	1	7	58	POMGNT1,PIGZ,FUT11,GLT8D1,B4GALT7,B4GALT5,POGLUT1		Chrna7	0.0908394		GO: Biological Process	GO:0035095	behavioral response to nicotine		0.0005838	1	0.07518	0.6715	3	9	CHRNA4,CHRNA7,PPARA
Atp6v0e2	0.0814652		GO: Molecular Function	GO:0004376	glycolipid mannosyltransferase activity		0.007451	1	0.1437	1	7	58	POMGNT1,PIGZ,FUT11,GLT8D1,B4GALT7,B4GALT5,POGLUT1		Chst15	0.0145506		GO: Biological Process	GO:0071417	cellular response to organonitrogen compound		0.0006366	1	0.07957	0.7108	22	517	IL18,ATP6AP1,INHBB,MAS1,HMGCS2,SSTR2,EZH2,PTGS2,ADCY8,PIK3C2A,UCHL3,PCSK9,COL4A1,ATP6V0E1,SLC25A33,KLF15,CRHBP,CRHR1,IGF1R,EGR1,AKAP1,GAB1
Atp6v1f	0.0509529		GO: Molecular Function	GO:0061650	ubiquitin-like protein conjugating enzyme activity		0.007743	1	0.1438	1	5	32	UBE2Q2,UBE2A,UBE2B,UBE2V1,UBE2J2		Clic6	0.000517457		GO: Biological Process	GO:0060441	epithelial tube branching involved in lung morphogenesis		0.0006596	1	0.0801	0.7154	5	36	DLG5,TNC,VANGL2,CELSR1,RSPO2
Atp6v1g2	0.0639647		GO: Molecular Function	GO:0047372	acylglycerol lipase activity		0.007892	1	0.1438	1	3	11	FAAH,DAGLA,DAGLB		Clmn	0.0880408		GO: Biological Process	GO:0098771	inorganic ion homeostasis		0.0006999	1	0.08263	0.738	27	698	ATP6AP1,CYBRD1,SWAP70,MTSS1,CHRNA7,HEPH,SGK3,SLC8B1,SLC17A7,GPR12,ATP6V0E1,RASA3,CLSTN1,S1PR1,CRHR1,EDNRA,CCKBR,SLC7A8,CORO1A,TMEM203,CD38,PRKD1,ATP1A1,FAM20A,FZD2,SLC4A11,PLCE1
Atpif1	0.0140644		GO: Molecular Function	GO:0046920	alpha-(1->3)-fucosyltransferase activity		0.008174	1	0.1438	1	7	59	POMGNT1,PIGZ,FUT11,GLT8D1,B4GALT7,B4GALT5,POGLUT1		Clstn1	0.0690697		GO: Biological Process	GO:0045667	regulation of osteoblast differentiation		0.000744	1	0.08546	0.7633	9	123	ATP6AP1,CEBPA,BMP2,GLI3,JAG1,ID4,PRKD1,IL6R,CD276
Aup1	0.0264106		GO: Molecular Function	GO:0000033	alpha-1,3-mannosyltransferase activity		0.008174	1	0.1438	1	7	59	POMGNT1,PIGZ,FUT11,GLT8D1,B4GALT7,B4GALT5,POGLUT1		Cmtm3	5.71732e-14		GO: Biological Process	GO:0045600	positive regulation of fat cell differentiation		0.0007955	1	0.0868	0.7753	6	56	ZBTB16,CEBPA,PTGS2,BMP2,UCHL3,FRZB
Aurkaip1	0.0618397		GO: Molecular Function	GO:0000030	mannosyltransferase activity		0.008443	1	0.1438	1	8	74	POMGNT1,PIGZ,FUT11,GLT8D1,ALG1,B4GALT7,B4GALT5,POGLUT1		Cnih3	0.0808295		GO: Biological Process	GO:0000165	MAPK cascade		0.0007965	1	0.0868	0.7753	33	928	DOK5,ERBB3,IL18,ATP6AP1,INHBB,NTSR2,EZH2,CHRNA7,BMP2,PTPRR,FAM83D,TNFRSF19,ALOX12B,DUSP18,RASA3,DUSP1,WNT7A,MAP3K6,RGS3,EDNRA,CCKBR,VANGL2,HAVCR2,IGF1R,RASA4,CNKSR3,GLIPR2,MAP2K6,TRIB1,DIRAS2,IL6R,GAB1,PLCE1
B4galnt4	0.0618397		GO: Molecular Function	GO:0008381	mechanosensitive ion channel activity		0.008793	1	0.1438	1	2	4	PIEZO1,KCNK4		Cnksr3	0.074287		GO: Biological Process	GO:0007613	memory		0.0008354	1	0.08876	0.7928	9	125	PTGS2,ADCY8,CHRNA7,SLC17A7,PAK5,CRHR1,EGR1,CX3CR1,RCAN2
B4galt5	0.0557009		GO: Molecular Function	GO:0016972	thiol oxidase activity		0.008793	1	0.1438	1	2	4	GFER,TMX3		Col4a1	0.060598		GO: Biological Process	GO:0043583	ear development		0.0009594	1	0.09095	0.8124	13	239	CEBPA,GJB6,BMP2,FREM2,GLI3,JAG1,SDC4,LGR5,VANGL2,CELSR1,FRZB,DCHS1,FZD2
B4galt7	0.0377799		GO: Molecular Function	GO:0070053	thrombospondin receptor activity		0.008793	1	0.1438	1	2	4	SDC4,CD47		Coro1a	0.0998971		GO: Biological Process	GO:0099537	trans-synaptic signaling		0.0009924	1	0.09095	0.8124	26	678	ZMYND8,SSTR2,CHRM3,PTGS2,CHRNA4,CHRNA7,CNIH3,PER2,KCNC4,PTPRN2,PLCL2,SLC17A7,SYP,NPY,CACNB2,WNT7A,GABBR2,GRM2,CLSTN1,CRHBP,CRHR1,CCKBR,CELSR1,EGR1,CD38,CX3CR1
B630005N14Rik	0.0903711		GO: Molecular Function	GO:0005173	stem cell factor receptor binding		0.008793	1	0.1438	1	2	4	KITLG,SPRED1		Cox20	0.0515026		GO: Biological Process	GO:0098916	anterograde trans-synaptic signaling		0.0009924	1	0.09095	0.8124	26	678	ZMYND8,SSTR2,CHRM3,PTGS2,CHRNA4,CHRNA7,CNIH3,PER2,KCNC4,PTPRN2,PLCL2,SLC17A7,SYP,NPY,CACNB2,WNT7A,GABBR2,GRM2,CLSTN1,CRHBP,CRHR1,CCKBR,CELSR1,EGR1,CD38,CX3CR1
Basp1	0.0269625		GO: Molecular Function	GO:0030158	protein xylosyltransferase activity		0.008793	1	0.1438	1	2	4	XYLT1,POGLUT1		Cpm	0.0094641		GO: Biological Process	GO:0007268	chemical synaptic transmission		0.0009924	1	0.09095	0.8124	26	678	ZMYND8,SSTR2,CHRM3,PTGS2,CHRNA4,CHRNA7,CNIH3,PER2,KCNC4,PTPRN2,PLCL2,SLC17A7,SYP,NPY,CACNB2,WNT7A,GABBR2,GRM2,CLSTN1,CRHBP,CRHR1,CCKBR,CELSR1,EGR1,CD38,CX3CR1
BC002163	0.0240938		GO: Molecular Function	GO:0016247	channel regulator activity		0.008806	1	0.1438	1	12	139	KCNIP3,SRI,NEDD4,STX1A,NPY,NPY2R,GRM2,COMMD1,STOML1,YWHAH,DLG1,PCSK9		Crem	0.0438685		GO: Biological Process	GO:0040012	regulation of locomotion		0.00103	1	0.09095	0.8124	31	866	ERBB3,IL18,SWAP70,PTGS2,TMEFF2,SGK3,BMP2,PTPRR,SRGAP3,AMOT,JAG1,PKP2,SEMA6A,PLD1,SDC4,NOV,WNT7A,PRR5,S1PR1,EDNRA,CORO1A,IGF1R,EGR1,GLIPR2,PRKD1,PAX6,ARHGAP18,TRIB1,IL6R,CX3CR1,GAB1
BC051226	0.0527802		GO: Molecular Function	GO:0050699	WW domain binding		0.008837	1	0.1438	1	5	33	SHISA5,TCEAL5,TCEAL3,TCEAL6,PMEPA1		Crhbp	0.0998971		GO: Biological Process	GO:0042476	odontogenesis		0.001045	1	0.09095	0.8124	9	129	HTRA1,BMP2,GLI3,ADAMTS1,TNC,PPARA,EDNRA,RSPO2,FAM20A
BC056474	0.0898927		GO: Molecular Function	GO:0004583	dolichyl-phosphate-glucose-glycolipid alpha-glucosyltransferase activity		0.008949	1	0.1438	1	7	60	POMGNT1,PIGZ,FUT11,GLT8D1,B4GALT7,B4GALT5,POGLUT1		Crhr1	0.00064441		GO: Biological Process	GO:0002009	morphogenesis of an epithelium		0.001068	1	0.09095	0.8124	24	609	DLG5,MTSS1,TMEFF2,BMP2,FREM2,ALDH1A2,GLI3,JAG1,SDC4,NOTCH4,COL4A1,TNC,WNT7A,ID4,LCP1,LGR5,EDNRA,VANGL2,CELSR1,IGF1R,FRZB,DCHS1,RSPO2,FZD2
BC068157	0.078256		GO: Molecular Function	GO:0005507	copper ion binding		0.008949	1	0.1438	1	7	60	MT3,ATOX1,P2RX4,COMMD1,HEPH,CCS,COX17		Crot	0.060598		GO: Biological Process	GO:0048754	branching morphogenesis of an epithelial tube		0.001091	1	0.09095	0.8124	11	184	DLG5,BMP2,GLI3,NOTCH4,COL4A1,TNC,EDNRA,VANGL2,CELSR1,DCHS1,RSPO2
Bet1l	0.0757075		GO: Biological Process	GO:0009161	ribonucleoside monophosphate metabolic process		1.566e-06	0.008064	0.001536	0.01401	30	291	RFK,AK4,HKDC1,UQCC2,NT5C2,ATP5F1E,ATP5ME,ATP5PF,NDUFA1,NDUFA2,NDUFA3,NDUFA5,NDUFA6,NDUFB7,NDUFS6,TSPO,UQCR11,HK1,UQCR10,PGAM1,PGK1,COX6A1,COX6B1,COX6C,COX8A,DLG1,ADSSL1,ATP5IF1,NDUFA13,ENO1		Cx3cr1	0.00521553		GO: Biological Process	GO:0044691	tooth eruption		0.001147	1	0.09095	0.8124	2	3	ADAMTS1,FAM20A
Bhlhb9	0.0104261		GO: Biological Process	GO:0009167	purine ribonucleoside monophosphate metabolic process		1.977e-06	0.01018	0.001536	0.01401	29	279	AK4,HKDC1,UQCC2,NT5C2,ATP5F1E,ATP5ME,ATP5PF,NDUFA1,NDUFA2,NDUFA3,NDUFA5,NDUFA6,NDUFB7,NDUFS6,TSPO,UQCR11,HK1,UQCR10,PGAM1,PGK1,COX6A1,COX6B1,COX6C,COX8A,DLG1,ADSSL1,ATP5IF1,NDUFA13,ENO1		Cxxc5	0.0872598		GO: Biological Process	GO:0060448	dichotomous subdivision of terminal units involved in lung branching		0.001147	1	0.09095	0.8124	2	3	VANGL2,CELSR1
Blvrb	0.0948147		GO: Biological Process	GO:0009126	purine nucleoside monophosphate metabolic process		2.125e-06	0.01094	0.001536	0.01401	29	280	AK4,HKDC1,UQCC2,NT5C2,ATP5F1E,ATP5ME,ATP5PF,NDUFA1,NDUFA2,NDUFA3,NDUFA5,NDUFA6,NDUFB7,NDUFS6,TSPO,UQCR11,HK1,UQCR10,PGAM1,PGK1,COX6A1,COX6B1,COX6C,COX8A,DLG1,ADSSL1,ATP5IF1,NDUFA13,ENO1		Cybrd1	0.0610656		GO: Biological Process	GO:1904057	negative regulation of sensory perception of pain		0.001147	1	0.09095	0.8124	2	3	KCNC4,NOV
Bmi1	0.0679485		GO: Biological Process	GO:0046128	purine ribonucleoside metabolic process		2.516e-06	0.01295	0.001536	0.01401	34	361	LRRK2,AK4,HKDC1,UQCC2,NT5C2,ATP5F1E,ATP5ME,ATP5PF,NDUFA1,NDUFA2,NDUFA3,NDUFA5,NDUFA6,NDUFB7,NDUFS6,SULT1A1,TSPO,UQCR11,PAPSS2,HK1,UQCR10,PGAM1,PGK1,COX6A1,COX6B1,COX6C,COX8A,CROT,SLC35B2,DLG1,ADSSL1,ATP5IF1,NDUFA13,ENO1		Cyp4v3	0.0515045		GO: Biological Process	GO:0034334	adherens junction maintenance		0.001147	1	0.09095	0.8124	2	3	MTSS1,PKP2
Bola2	0.0181187		GO: Biological Process	GO:0019693	ribose phosphate metabolic process		2.842e-06	0.01463	0.001536	0.01401	46	566	RFK,LRRK2,AK4,HKDC1,UQCC2,PDE8B,NT5C2,PDE7B,ATP5F1E,ATP5ME,ATP5PF,NDUFA1,NDUFA2,NDUFA3,NDUFA5,NDUFA6,NDUFB7,NDUFS6,SULT1A1,TSPO,UQCR11,NPY2R,GRM2,PAPSS2,OPRM1,GUCY2C,HINT1,HK1,CHGA,UQCR10,PGAM1,PGK1,COX6A1,COX6B1,COX6C,COX8A,GABBR2,CRHR1,CROT,SLC35B2,DLG1,ADSSL1,ATP5IF1,NDUFA13,ENO1,RPE		D4Wsu53e	0.0313839		GO: Biological Process	GO:0030029	actin filament-based process		0.001149	1	0.09095	0.8124	26	685	TPM3,CDC42EP4,SWAP70,IQGAP2,MTSS1,OBSCN,BCL6,RHOU,TMEFF2,FARP2,AMOT,TESK2,PKP2,WASF1,SDC4,MAP3K19,CACNB2,PRR5,LCP1,S1PR1,VANGL2,CORO1A,CELSR1,ATP1A1,ARHGAP18,ACAP2
Brdt	0.0696563		GO: Biological Process	GO:0042278	purine nucleoside metabolic process		3.022e-06	0.01556	0.001536	0.01401	34	364	LRRK2,AK4,HKDC1,UQCC2,NT5C2,ATP5F1E,ATP5ME,ATP5PF,NDUFA1,NDUFA2,NDUFA3,NDUFA5,NDUFA6,NDUFB7,NDUFS6,SULT1A1,TSPO,UQCR11,PAPSS2,HK1,UQCR10,PGAM1,PGK1,COX6A1,COX6B1,COX6C,COX8A,CROT,SLC35B2,DLG1,ADSSL1,ATP5IF1,NDUFA13,ENO1		Dact2	0.0344975		GO: Biological Process	GO:0035295	tube development		0.001173	1	0.09095	0.8124	26	686	CDKN1A,PCSK5,DLG5,CEBPA,MTSS1,DACT2,HMGCS2,BMP2,ALDH1A2,SALL2,GLI3,JAG1,SDC4,NOTCH4,COL4A1,TNC,WNT7A,LGR5,EDNRA,CCKBR,VANGL2,CELSR1,DCHS1,RSPO2,PAX6,FZD2
Brk1	0.0015794		GO: Biological Process	GO:0009259	ribonucleotide metabolic process		3.208e-06	0.01652	0.001536	0.01401	45	551	RFK,LRRK2,AK4,HKDC1,UQCC2,PDE8B,NT5C2,PDE7B,ATP5F1E,ATP5ME,ATP5PF,NDUFA1,NDUFA2,NDUFA3,NDUFA5,NDUFA6,NDUFB7,NDUFS6,SULT1A1,TSPO,UQCR11,NPY2R,GRM2,PAPSS2,OPRM1,GUCY2C,HINT1,HK1,CHGA,UQCR10,PGAM1,PGK1,COX6A1,COX6B1,COX6C,COX8A,GABBR2,CRHR1,CROT,SLC35B2,DLG1,ADSSL1,ATP5IF1,NDUFA13,ENO1		Dclre1b	0.0385972		GO: Biological Process	GO:0099536	synaptic signaling		0.001198	1	0.09095	0.8124	26	687	ZMYND8,SSTR2,CHRM3,PTGS2,CHRNA4,CHRNA7,CNIH3,PER2,KCNC4,PTPRN2,PLCL2,SLC17A7,SYP,NPY,CACNB2,WNT7A,GABBR2,GRM2,CLSTN1,CRHBP,CRHR1,CCKBR,CELSR1,EGR1,CD38,CX3CR1
C330021F23Rik	0.00127173		GO: Biological Process	GO:0009144	purine nucleoside triphosphate metabolic process		3.327e-06	0.01712	0.001536	0.01401	28	271	LRRK2,AK4,HKDC1,UQCC2,OGA,ATP5F1E,ATP5ME,ATP5PF,NDUFA1,NDUFA2,NDUFA3,NDUFA5,NDUFA6,NDUFB7,NDUFS6,TSPO,UQCR11,HK1,UQCR10,PGAM1,PGK1,COX6A1,COX6B1,COX6C,COX8A,ATP5IF1,NDUFA13,ENO1		Dhcr24	0.0656411		GO: Biological Process	GO:0034762	regulation of transmembrane transport		0.001198	1	0.09095	0.8124	20	473	CHRNA4,CNIH3,KCNA6,KCNC4,KCND1,PIK3C2A,KCNF1,KCNH1,KCNN2,KCNS2,PCSK9,CACNB2,CLIC6,CRHBP,CRHR1,EDNRA,AZIN1,CORO1A,CNKSR3,PRKD1
Caap1	0.0606622		GO: Biological Process	GO:0042775	mitochondrial ATP synthesis coupled electron transport		3.476e-06	0.0179	0.001536	0.01401	14	82	NDUFA1,NDUFA2,NDUFA3,NDUFA5,NDUFA6,NDUFB7,NDUFS6,UQCR11,UQCR10,COX6A1,COX6B1,COX6C,COX8A,NDUFA13		Dio2	0.0204422		GO: Biological Process	GO:0048149	behavioral response to ethanol		0.001463	1	0.1088	0.9722	3	12	CHRNA7,CRHBP,CRHR1
Cab39l	0.0880838		GO: Biological Process	GO:0009150	purine ribonucleotide metabolic process		3.616e-06	0.01862	0.001536	0.01401	44	536	LRRK2,AK4,HKDC1,UQCC2,PDE8B,NT5C2,PDE7B,ATP5F1E,ATP5ME,ATP5PF,NDUFA1,NDUFA2,NDUFA3,NDUFA5,NDUFA6,NDUFB7,NDUFS6,SULT1A1,TSPO,UQCR11,NPY2R,GRM2,PAPSS2,OPRM1,GUCY2C,HINT1,HK1,CHGA,UQCR10,PGAM1,PGK1,COX6A1,COX6B1,COX6C,COX8A,GABBR2,CRHR1,CROT,SLC35B2,DLG1,ADSSL1,ATP5IF1,NDUFA13,ENO1		Diras2	0.0126438		GO: Biological Process	GO:0043408	regulation of MAPK cascade		0.001492	1	0.1088	0.9722	27	735	ATP6AP1,INHBB,NTSR2,EZH2,CHRNA7,BMP2,PTPRR,FAM83D,TNFRSF19,ALOX12B,DUSP18,DUSP1,WNT7A,MAP3K6,RGS3,EDNRA,VANGL2,HAVCR2,IGF1R,CNKSR3,GLIPR2,MAP2K6,TRIB1,DIRAS2,IL6R,GAB1,PLCE1
Cables1	0.0814652		GO: Biological Process	GO:0046034	ATP metabolic process		3.624e-06	0.01866	0.001536	0.01401	26	242	AK4,HKDC1,UQCC2,ATP5F1E,ATP5ME,ATP5PF,NDUFA1,NDUFA2,NDUFA3,NDUFA5,NDUFA6,NDUFB7,NDUFS6,TSPO,UQCR11,HK1,UQCR10,PGAM1,PGK1,COX6A1,COX6B1,COX6C,COX8A,ATP5IF1,NDUFA13,ENO1		Dlg5	0.0136505		GO: Biological Process	GO:0030855	epithelial cell differentiation		0.001525	1	0.1088	0.9722	25	662	CDKN1A,DLG5,MTSS1,DACT2,HAPLN2,CCND1,EZH2,PTGS2,BMP2,TFCP2L1,GLI3,JAG1,ADAMTS20,MLPH,NOTCH4,COL4A1,WNT7A,KLF15,POU3F1,S1PR1,CRHR1,SCUBE1,FRZB,PAX6,FZD2
Cacybp	0.0679485		GO: Biological Process	GO:0009123	nucleoside monophosphate metabolic process		3.836e-06	0.01975	0.001536	0.01401	30	304	RFK,AK4,HKDC1,UQCC2,NT5C2,ATP5F1E,ATP5ME,ATP5PF,NDUFA1,NDUFA2,NDUFA3,NDUFA5,NDUFA6,NDUFB7,NDUFS6,TSPO,UQCR11,HK1,UQCR10,PGAM1,PGK1,COX6A1,COX6B1,COX6C,COX8A,DLG1,ADSSL1,ATP5IF1,NDUFA13,ENO1		Dok5	0.0550609		GO: Biological Process	GO:0048864	stem cell development		0.001537	1	0.1088	0.9722	11	192	EZH2,BMP2,ALDH1A2,JAG1,FAM83D,SEMA6A,WNT7A,EDNRA,VANGL2,GLIPR2,PAX6
Cadm1	0.0954829		GO: Biological Process	GO:0006163	purine nucleotide metabolic process		3.879e-06	0.01997	0.001536	0.01401	45	555	LRRK2,AK4,HKDC1,UQCC2,PDE8B,NT5C2,OGA,PDE7B,ATP5F1E,ATP5ME,ATP5PF,NDUFA1,NDUFA2,NDUFA3,NDUFA5,NDUFA6,NDUFB7,NDUFS6,SULT1A1,TSPO,UQCR11,NPY2R,GRM2,PAPSS2,OPRM1,GUCY2C,HINT1,HK1,CHGA,UQCR10,PGAM1,PGK1,COX6A1,COX6B1,COX6C,COX8A,GABBR2,CRHR1,CROT,SLC35B2,DLG1,ADSSL1,ATP5IF1,NDUFA13,ENO1		Dusp1	0.0279777		GO: Biological Process	GO:0032835	glomerulus development		0.00161	1	0.1099	0.982	6	64	MTSS1,JAG1,KLF15,VANGL2,EGR1,PLCE1
Cadm3	0.0440092		GO: Biological Process	GO:0042773	ATP synthesis coupled electron transport		5.387e-06	0.02773	0.001842	0.0168	14	85	NDUFA1,NDUFA2,NDUFA3,NDUFA5,NDUFA6,NDUFB7,NDUFS6,UQCR11,UQCR10,COX6A1,COX6B1,COX6C,COX8A,NDUFA13		Dusp18	0.00944947		GO: Biological Process	GO:0030003	cellular cation homeostasis		0.001623	1	0.1099	0.982	23	592	CYBRD1,SWAP70,CHRNA7,HEPH,SGK3,SLC8B1,SLC17A7,GPR12,ATP6V0E1,RASA3,CLSTN1,S1PR1,CRHR1,EDNRA,CCKBR,CORO1A,TMEM203,CD38,PRKD1,ATP1A1,FZD2,SLC4A11,PLCE1
Camk2g	0.0219331		GO: Biological Process	GO:0009205	purine ribonucleoside triphosphate metabolic process		5.591e-06	0.02878	0.001842	0.0168	27	263	LRRK2,AK4,HKDC1,UQCC2,ATP5F1E,ATP5ME,ATP5PF,NDUFA1,NDUFA2,NDUFA3,NDUFA5,NDUFA6,NDUFB7,NDUFS6,TSPO,UQCR11,HK1,UQCR10,PGAM1,PGK1,COX6A1,COX6B1,COX6C,COX8A,ATP5IF1,NDUFA13,ENO1		Dzip1l	0.00139777		GO: Biological Process	GO:0001649	osteoblast differentiation		0.00163	1	0.1099	0.982	12	223	ATP6AP1,CEBPA,BMP2,GLI3,JAG1,FHL2,TNC,ID4,RSPO2,PRKD1,IL6R,CD276
Car4	0.0972882		GO: Biological Process	GO:0015672	monovalent inorganic cation transport		5.724e-06	0.02947	0.001842	0.0168	48	617	ASIC1,SLC24A3,KCNIP3,SCN9A,SLC5A3,SLC8A2,OAZ3,ATP5F1E,ATP5ME,ATP5PF,ATP6V1G2,NEDD4,ABCC8,GNAQ,UQCR11,SLC38A3,NPY2R,KCNH4,P2RX4,SLC2A6,SLC24A5,PCP4,SLC5A7,ATP6V1F,UQCR10,CHRNA4,SLC38A2,COMMD1,STOML1,SLC2A8,COX6A1,COX6B1,COX6C,COX8A,YWHAH,ATP6V0E2,TRPM4,KCNK4,KCND1,KCNH1,KCNN2,SLC17A7,DLG1,NKAIN1,KIF5B,SLC35A5,PCSK9,HCN4		E2f5	0.044692		GO: Biological Process	GO:0055065	metal ion homeostasis		0.001658	1	0.1101	0.9836	23	593	CYBRD1,SWAP70,MTSS1,CHRNA7,HEPH,SGK3,SLC8B1,GPR12,RASA3,CLSTN1,S1PR1,CRHR1,EDNRA,CCKBR,SLC7A8,CORO1A,TMEM203,CD38,PRKD1,ATP1A1,FAM20A,FZD2,PLCE1
Cbln4	0.000141449		GO: Biological Process	GO:0006091	generation of precursor metabolites and energy		6.284e-06	0.03235	0.001903	0.01736	35	393	HKDC1,UQCC2,SORBS1,MT3,PTGES3,NDUFA1,NDUFA2,NDUFA3,NDUFA5,NDUFA6,NDUFB7,NDUFS6,PER2,UQCR11,HK1,UQCR10,PGAM1,PGK1,PHKA1,UBB,KL,UGP2,COX6A1,COX6B1,COX6C,COX8A,NR1D1,PPP1R3C,CROT,XYLB,ATP5IF1,COX17,NDUFA13,AASS,ENO1		E2f6	0.0634295		GO: Biological Process	GO:1901699	cellular response to nitrogen compound		0.001807	1	0.117	1	23	597	IL18,ATP6AP1,INHBB,MAS1,HMGCS2,SSTR2,EZH2,CHRM3,PTGS2,ADCY8,PIK3C2A,UCHL3,PCSK9,COL4A1,ATP6V0E1,SLC25A33,KLF15,CRHBP,CRHR1,IGF1R,EGR1,AKAP1,GAB1
Cbr1	0.0879586		GO: Biological Process	GO:0070972	protein localization to endoplasmic reticulum		8.147e-06	0.04194	0.00233	0.02126	17	125	RPL32,RPL38,RPL39,RPL41,RPLP1,RPS2,RPS11,RPS15,RPS21,RPS25,SRP14,SSR3,PDIA3,HSPA5,ZFAND2B,ANKRD13C,RPL19		Ednra	0.0145506		GO: Biological Process	GO:0034765	regulation of ion transmembrane transport		0.001817	1	0.117	1	19	455	CHRNA4,CNIH3,KCNA6,KCNC4,KCND1,PIK3C2A,KCNF1,KCNH1,KCNN2,KCNS2,PCSK9,CACNB2,CLIC6,CRHBP,CRHR1,EDNRA,CORO1A,CNKSR3,PRKD1
Cbwd1	0.0650381		GO: Biological Process	GO:0009199	ribonucleoside triphosphate metabolic process		9.094e-06	0.04681	0.002464	0.02248	27	270	LRRK2,AK4,HKDC1,UQCC2,ATP5F1E,ATP5ME,ATP5PF,NDUFA1,NDUFA2,NDUFA3,NDUFA5,NDUFA6,NDUFB7,NDUFS6,TSPO,UQCR11,HK1,UQCR10,PGAM1,PGK1,COX6A1,COX6B1,COX6C,COX8A,ATP5IF1,NDUFA13,ENO1		Eepd1	0.00634847		GO: Biological Process	GO:0035136	forelimb morphogenesis		0.00185	1	0.1171	1	5	45	ZBTB16,ALDH1A2,WNT7A,WNT9A,RSPO2
Ccdc107	0.0972829		GO: Biological Process	GO:0009117	nucleotide metabolic process		1.314e-05	0.06764	0.003382	0.03086	51	692	RFK,LRRK2,AK4,FMO1,FMO2,HKDC1,UQCC2,PDE8B,NT5C2,OGA,PDE7B,ATP5F1E,ATP5ME,ATP5PF,NADK2,NDUFA1,NDUFA2,NDUFA3,NDUFA5,NDUFA6,NDUFB7,NDUFS6,SULT1A1,TSPO,UQCR11,NPY2R,GRM2,PAPSS2,OPRM1,GUCY2C,HINT1,HK1,CHGA,UQCR10,PGAM1,PGK1,COX6A1,COX6B1,COX6C,COX8A,GABBR2,CRHR1,CROT,SLC35B2,NUDT12,DLG1,ADSSL1,ATP5IF1,NDUFA13,ENO1,RPE		Egr1	0.0483563		GO: Biological Process	GO:0045176	apical protein localization		0.001874	1	0.1171	1	3	13	DLG5,VANGL2,CELSR1
Ccdc142	0.0474883		GO: Biological Process	GO:0009119	ribonucleoside metabolic process		1.409e-05	0.07255	0.003455	0.03152	34	391	LRRK2,AK4,HKDC1,UQCC2,NT5C2,ATP5F1E,ATP5ME,ATP5PF,NDUFA1,NDUFA2,NDUFA3,NDUFA5,NDUFA6,NDUFB7,NDUFS6,SULT1A1,TSPO,UQCR11,PAPSS2,HK1,UQCR10,PGAM1,PGK1,COX6A1,COX6B1,COX6C,COX8A,CROT,SLC35B2,DLG1,ADSSL1,ATP5IF1,NDUFA13,ENO1		Egr4	0.0668866		GO: Biological Process	GO:0030111	regulation of Wnt signaling pathway		0.001914	1	0.1179	1	15	322	TRABD2B,KREMEN1,RGS19,DACT2,CCND1,BMP2,GLI3,WNT7A,LGR5,NXN,VANGL2,EGR1,FRZB,RSPO2,EMD
Ccdc85a	0.00667195		GO: Biological Process	GO:0009141	nucleoside triphosphate metabolic process		1.657e-05	0.0853	0.003877	0.03537	28	295	LRRK2,AK4,HKDC1,UQCC2,OGA,ATP5F1E,ATP5ME,ATP5PF,NDUFA1,NDUFA2,NDUFA3,NDUFA5,NDUFA6,NDUFB7,NDUFS6,TSPO,UQCR11,HK1,UQCR10,PGAM1,PGK1,COX6A1,COX6B1,COX6C,COX8A,ATP5IF1,NDUFA13,ENO1		Emd	0.0482789		GO: Biological Process	GO:0048762	mesenchymal cell differentiation		0.002121	1	0.1272	1	11	200	EZH2,BMP2,ALDH1A2,JAG1,FAM83D,SEMA6A,EDNRA,VANGL2,FRZB,GLIPR2,PAX6
Ccdc94	0.024643		GO: Biological Process	GO:0006614	SRP-dependent cotranslational protein targeting to membrane		1.782e-05	0.09173	0.003988	0.03639	14	94	RPL32,RPL38,RPL39,RPL41,RPLP1,RPS2,RPS11,RPS15,RPS21,RPS25,SRP14,SSR3,ZFAND2B,RPL19		Erbb3	0.014581		GO: Biological Process	GO:0006873	cellular ion homeostasis		0.002231	1	0.1272	1	23	607	CYBRD1,SWAP70,CHRNA7,HEPH,SGK3,SLC8B1,SLC17A7,GPR12,ATP6V0E1,RASA3,CLSTN1,S1PR1,CRHR1,EDNRA,CCKBR,CORO1A,TMEM203,CD38,PRKD1,ATP1A1,FZD2,SLC4A11,PLCE1
Ccnd2	0.0899964		GO: Biological Process	GO:0006753	nucleoside phosphate metabolic process		1.933e-05	0.09949	0.004146	0.03782	51	702	RFK,LRRK2,AK4,FMO1,FMO2,HKDC1,UQCC2,PDE8B,NT5C2,OGA,PDE7B,ATP5F1E,ATP5ME,ATP5PF,NADK2,NDUFA1,NDUFA2,NDUFA3,NDUFA5,NDUFA6,NDUFB7,NDUFS6,SULT1A1,TSPO,UQCR11,NPY2R,GRM2,PAPSS2,OPRM1,GUCY2C,HINT1,HK1,CHGA,UQCR10,PGAM1,PGK1,COX6A1,COX6B1,COX6C,COX8A,GABBR2,CRHR1,CROT,SLC35B2,NUDT12,DLG1,ADSSL1,ATP5IF1,NDUFA13,ENO1,RPE		Eva1a	0.000177971		GO: Biological Process	GO:0072006	nephron development		0.002244	1	0.1272	1	9	144	MTSS1,BMP2,GLI3,JAG1,KLF15,VANGL2,EGR1,DCHS1,PLCE1
Ccng1	0.0020638		GO: Biological Process	GO:0006119	oxidative phosphorylation		2.128e-05	0.1096	0.004383	0.03999	15	108	UQCC2,NDUFA1,NDUFA2,NDUFA3,NDUFA5,NDUFA6,NDUFB7,NDUFS6,UQCR11,UQCR10,COX6A1,COX6B1,COX6C,COX8A,NDUFA13		Exo5	0.0935152		GO: Biological Process	GO:0003150	muscular septum morphogenesis		0.002264	1	0.1272	1	2	4	VANGL2,FZD2
Ccs	0.0814652		GO: Biological Process	GO:0072521	purine-containing compound metabolic process		3.137e-05	0.1615	0.006212	0.05668	45	603	LRRK2,AK4,HKDC1,UQCC2,PDE8B,NT5C2,OGA,PDE7B,ATP5F1E,ATP5ME,ATP5PF,NDUFA1,NDUFA2,NDUFA3,NDUFA5,NDUFA6,NDUFB7,NDUFS6,SULT1A1,TSPO,UQCR11,NPY2R,GRM2,PAPSS2,OPRM1,GUCY2C,HINT1,HK1,CHGA,UQCR10,PGAM1,PGK1,COX6A1,COX6B1,COX6C,COX8A,GABBR2,CRHR1,CROT,SLC35B2,DLG1,ADSSL1,ATP5IF1,NDUFA13,ENO1		Ezh2	0.0403059		GO: Biological Process	GO:2001013	epithelial cell proliferation involved in renal tubule morphogenesis		0.002264	1	0.1272	1	2	4	MTSS1,LGR5
Cd276	0.0846813		GO: Biological Process	GO:0006613	cotranslational protein targeting to membrane		4.069e-05	0.2095	0.007759	0.07079	14	101	RPL32,RPL38,RPL39,RPL41,RPLP1,RPS2,RPS11,RPS15,RPS21,RPS25,SRP14,SSR3,ZFAND2B,RPL19		Fam107a	0.018517		GO: Biological Process	GO:0014834	skeletal muscle satellite cell maintenance involved in skeletal muscle regeneration		0.002264	1	0.1272	1	2	4	EZH2,WNT7A
Cd38	0.0323343		GO: Biological Process	GO:0009116	nucleoside metabolic process		4.331e-05	0.223	0.007964	0.07266	34	413	LRRK2,AK4,HKDC1,UQCC2,NT5C2,ATP5F1E,ATP5ME,ATP5PF,NDUFA1,NDUFA2,NDUFA3,NDUFA5,NDUFA6,NDUFB7,NDUFS6,SULT1A1,TSPO,UQCR11,PAPSS2,HK1,UQCR10,PGAM1,PGK1,COX6A1,COX6B1,COX6C,COX8A,CROT,SLC35B2,DLG1,ADSSL1,ATP5IF1,NDUFA13,ENO1		Fam13c	0.0385972		GO: Biological Process	GO:0042475	odontogenesis of dentin-containing tooth		0.002275	1	0.1272	1	7	92	HTRA1,BMP2,GLI3,TNC,PPARA,RSPO2,FAM20A
Cd47	0.0982952		GO: Biological Process	GO:0045047	protein targeting to ER		4.549e-05	0.2342	0.008075	0.07367	14	102	RPL32,RPL38,RPL39,RPL41,RPLP1,RPS2,RPS11,RPS15,RPS21,RPS25,SRP14,SSR3,ZFAND2B,RPL19		Fam20a	0.0432468		GO: Biological Process	GO:0060485	mesenchyme development		0.002331	1	0.1278	1	13	264	ERBB3,EZH2,BMP2,ALDH1A2,JAG1,FAM83D,SEMA6A,EDNRA,VANGL2,FRZB,DCHS1,GLIPR2,PAX6
Cdadc1	0.0474883		GO: Biological Process	GO:1901657	glycosyl compound metabolic process		5.361e-05	0.276	0.009199	0.08393	35	435	LRRK2,AK4,HKDC1,UQCC2,NT5C2,ATP5F1E,ATP5ME,ATP5PF,NDUFA1,NDUFA2,NDUFA3,NDUFA5,NDUFA6,NDUFB7,NDUFS6,SULT1A1,TSPO,UQCR11,PAPSS2,HK1,UQCR10,PGAM1,PGK1,KL,COX6A1,COX6B1,COX6C,COX8A,CROT,SLC35B2,DLG1,ADSSL1,ATP5IF1,NDUFA13,ENO1		Fam214a	0.0254328		GO: Biological Process	GO:0050801	ion homeostasis		0.002346	1	0.1278	1	27	759	ATP6AP1,CYBRD1,SWAP70,MTSS1,CHRNA7,HEPH,SGK3,SLC8B1,SLC17A7,GPR12,ATP6V0E1,RASA3,CLSTN1,S1PR1,CRHR1,EDNRA,CCKBR,SLC7A8,CORO1A,TMEM203,CD38,PRKD1,ATP1A1,FAM20A,FZD2,SLC4A11,PLCE1
Cdc37l1	0.0346029		GO: Biological Process	GO:0022904	respiratory electron transport chain		5.658e-05	0.2913	0.009396	0.08573	14	104	NDUFA1,NDUFA2,NDUFA3,NDUFA5,NDUFA6,NDUFB7,NDUFS6,UQCR11,UQCR10,COX6A1,COX6B1,COX6C,COX8A,NDUFA13		Fam83d	0.00371311		GO: Biological Process	GO:0048729	tissue morphogenesis		0.002478	1	0.1322	1	27	762	DLG5,MTSS1,FJX1,TMEFF2,BMP2,FREM2,ALDH1A2,GLI3,JAG1,PKP2,SDC4,NOTCH4,COL4A1,TNC,WNT7A,ID4,LCP1,LGR5,S1PR1,EDNRA,VANGL2,CELSR1,IGF1R,FRZB,DCHS1,RSPO2,FZD2
Cdh19	0.000776187		GO: Biological Process	GO:0072599	establishment of protein localization to endoplasmic reticulum		6.997e-05	0.3602	0.01126	0.1027	14	106	RPL32,RPL38,RPL39,RPL41,RPLP1,RPS2,RPS11,RPS15,RPS21,RPS25,SRP14,SSR3,ZFAND2B,RPL19		Farp2	0.0140395		GO: Biological Process	GO:0032868	response to insulin		0.002489	1	0.1322	1	13	266	ATP6AP1,INHBB,HMGCS2,STXBP3,PIK3C2A,UCHL3,PCSK9,ATP6V0E1,SLC25A33,PPARA,IGF1R,EGR1,GAB1
Cdh4	0.0618024		GO: Biological Process	GO:0022900	electron transport chain		7.764e-05	0.3997	0.01211	0.1105	14	107	NDUFA1,NDUFA2,NDUFA3,NDUFA5,NDUFA6,NDUFB7,NDUFS6,UQCR11,UQCR10,COX6A1,COX6B1,COX6C,COX8A,NDUFA13		Fbxo34	0.0687999		GO: Biological Process	GO:0051272	positive regulation of cellular component movement		0.00261	1	0.137	1	19	470	IL18,SWAP70,BCL6,PTGS2,BMP2,AMOT,SEMA6A,PLD1,WNT7A,PRR5,S1PR1,EDNRA,CORO1A,IGF1R,EGR1,GLIPR2,PRKD1,PAX6,IL6R
Cep76	0.032913		GO: Biological Process	GO:0055086	nucleobase-containing small molecule metabolic process		8.585e-05	0.442	0.013	0.1186	52	763	RFK,LRRK2,AK4,FMO1,FMO2,HKDC1,UQCC2,PDE8B,NT5C2,OGA,PDE7B,ATP5F1E,ATP5ME,ATP5PF,NADK2,NDUFA1,NDUFA2,NDUFA3,NDUFA5,NDUFA6,NDUFB7,NDUFS6,SULT1A1,TSPO,UQCR11,NPY2R,GRM2,PAPSS2,OPRM1,GUCY2C,HINT1,HK1,CHGA,UQCR10,PGAM1,PGK1,COX6A1,COX6B1,COX6C,COX8A,GABBR2,CRHR1,CROT,SLC35B2,NUDT12,ADPRM,DLG1,ADSSL1,ATP5IF1,NDUFA13,ENO1,RPE		Fgfrl1	0.018517		GO: Biological Process	GO:0030278	regulation of ossification		0.002668	1	0.1383	1	11	206	ZBTB16,ATP6AP1,CEBPA,BMP2,GLI3,JAG1,ID4,S1PR1,PRKD1,IL6R,CD276
Cfl2	0.0346889		GO: Biological Process	GO:0060078	regulation of postsynaptic membrane potential		0.0001482	0.7629	0.02132	0.1945	13	100	LRRK2,STX1B,SCN9A,STX1A,NPY2R,NTSR1,OPRM1,P2RX4,CHRNA4,EIF4A3,SLC17A7,HCN4,SEZ6		Fhl2	0.086708		GO: Biological Process	GO:0015672	monovalent inorganic cation transport		0.002736	1	0.1399	1	23	617	ATP6AP1,SLC10A7,CHRNA4,SGK3,SLC38A2,SLC8B1,KCNA6,KCNC4,KCND1,KCNF1,KCNH1,KCNN2,PKP2,SLC17A7,KCNS2,PCSK9,HTR1A,ATP6V0E1,EDNRA,CCKBR,CNKSR3,ATP1A1,SLC4A11
Chac1	0.0517094		GO: Biological Process	GO:0006814	sodium ion transport		0.0001491	0.7675	0.02132	0.1945	21	218	ASIC1,SLC24A3,SCN9A,SLC5A3,SLC8A2,NEDD4,SLC38A3,P2RX4,SLC24A5,SLC5A7,SLC38A2,COMMD1,STOML1,YWHAH,TRPM4,SLC17A7,DLG1,NKAIN1,KIF5B,PCSK9,HCN4		Fjx1	0.0952628		GO: Biological Process	GO:0008284	positive regulation of cell proliferation		0.002806	1	0.1399	1	31	924	CDKN1A,HTRA1,IL18,MAS1,CCND1,BCL6,PTGS2,CHRNA7,BMP2,ALDH1A2,GLI3,NFYA,HTR1A,TNC,SLC25A33,WNT7A,ID4,S1PR1,EDNRA,CCKBR,HAVCR2,CORO1A,IGF1R,EGR1,EGR4,CD38,PRKD1,PAX6,IL6R,CX3CR1,CD276
Chchd6	0.0508192		GO: Biological Process	GO:0016051	carbohydrate biosynthetic process		0.0001694	0.872	0.02357	0.215	21	220	SORBS1,PTGES3,GLT8D1,PER2,DGAT2,ALG1,GOT2,NTSR1,PDGFB,PGAM1,PGK1,UBB,UGP2,PLEK,NR1D1,CRY1,PPP1R3C,SLC25A10,IMPA1,SESN2,ENO1		Fkbp5	9.53589e-75		GO: Biological Process	GO:0001503	ossification		0.002872	1	0.1399	1	17	404	ZBTB16,ATP6AP1,CEBPA,MTSS1,PTGS2,BMP2,GLI3,JAG1,FHL2,TNC,ID4,S1PR1,DCHS1,RSPO2,PRKD1,IL6R,CD276
Chga	0.0237178		GO: Biological Process	GO:0033108	mitochondrial respiratory chain complex assembly		0.0002039	1	0.0275	0.2509	11	77	UQCC2,NDUFA1,NDUFA2,NDUFA3,NDUFA5,NDUFA6,NDUFB7,NDUFS6,UQCR10,NDUFAF3,NDUFA13		Fmo1	0.0245427		GO: Biological Process	GO:0045598	regulation of fat cell differentiation		0.002893	1	0.1399	1	8	122	ZBTB16,CEBPA,PTGS2,BMP2,UCHL3,JAG1,ID4,FRZB
Chid1	0.0618397		GO: Biological Process	GO:0042274	ribosomal small subunit biogenesis		0.0002117	1	0.0275	0.2509	10	65	RPL38,RPS2,RPS15,RPS21,RPS25,NOB1,UTP6,ABT1,NOC4L,MPHOSPH10		Fmo2	1.32053e-06		GO: Biological Process	GO:0046033	AMP metabolic process		0.002896	1	0.1399	1	3	15	AK4,AMPD3,NT5E
Chka	0.00204026		GO: Biological Process	GO:0090150	establishment of protein localization to membrane		0.0002176	1	0.0275	0.2509	30	377	RPL32,RPL38,RPL39,RPL41,RAMP3,RPLP1,RPS2,RPS11,RPS15,RPS21,RPS25,REEP2,MIEF2,SORBS1,PACS1,DYNLL1,OGA,SRP14,GOLPH3,SSR3,EFR3A,WNT4,TOMM7,YWHAH,ZFAND2B,DLG1,KIF5B,NDUFA13,GOLGA7,RPL19		Fmo5	0.0515026		GO: Biological Process	GO:0090179	planar cell polarity pathway involved in neural tube closure		0.002896	1	0.1399	1	3	15	VANGL2,CELSR1,FZD2
Chordc1	0.0104261		GO: Biological Process	GO:0035725	sodium ion transmembrane transport		0.000219	1	0.0275	0.2509	15	132	ASIC1,SLC24A3,SCN9A,SLC8A2,NEDD4,SLC24A5,COMMD1,STOML1,YWHAH,TRPM4,SLC17A7,DLG1,KIF5B,PCSK9,HCN4		Fosb	0.0022751		GO: Biological Process	GO:0071900	regulation of protein serine/threonine kinase activity		0.003079	1	0.1463	1	20	513	CDKN1A,CEBPA,MAS1,CCND1,EZH2,CHRNA7,BMP2,DUSP18,DUSP1,MAP3K6,RGS3,VANGL2,CCNG1,IGF1R,FAM20A,MAP2K6,TRIB1,DIRAS2,GAB1,PLCE1
Chrm4	0.0661164		GO: Biological Process	GO:0098655	cation transmembrane transport		0.000253	1	0.03101	0.2829	49	738	ASIC1,SLC24A3,KCNIP3,S100A1,SCN9A,ORAI2,SLC8A2,ATOX1,ATP5F1E,ATP5ME,ATP5PF,SRI,NEDD4,ABCC8,UQCR11,SLC38A3,NTSR1,KCNH4,OPRM1,THY1,P2RX4,SLC24A5,ATP6V1F,UQCR10,CHRNA4,COMMD1,STOML1,HOMER1,COX6A1,COX6B1,COX6C,COX8A,YWHAH,CRHR1,ATP6V0E2,TRPM4,PIEZO1,SLC30A3,PQLC2,KCNK4,KCND1,KCNH1,KCNN2,SLC17A7,DLG1,KIF5B,PCSK9,HCN4,SLC25A15		Frem2	0.0304998		GO: Biological Process	GO:0010817	regulation of hormone levels		0.003127	1	0.1463	1	21	550	PCSK5,INHBB,BMP2,NELL2,ALDH1A2,SLC8B1,STXBP3,PER2,SULT1A1,PTPRN2,DIO2,NOV,HTR1A,CRHBP,CRHR1,CCKBR,IGF1R,SLC16A2,CD38,PAX6,ATP1A1
Chrna4	0.0191057		GO: Biological Process	GO:0006364	rRNA processing		0.0002615	1	0.03131	0.2856	23	260	RPL32,RPL38,RPL39,RPL41,RPLP1,RPS2,RPS11,RPS15,RPS21,RPS25,NOP10,NOB1,RPP38,DDX27,UTP6,RIOK3,RPP14,ABT1,BMT2,NOC4L,EIF4A3,MPHOSPH10,RPL19		Frmpd1	0.00579105		GO: Biological Process	GO:0060562	epithelial tube morphogenesis		0.003132	1	0.1463	1	16	373	DLG5,MTSS1,BMP2,ALDH1A2,GLI3,SDC4,NOTCH4,COL4A1,TNC,LGR5,EDNRA,VANGL2,CELSR1,DCHS1,RSPO2,FZD2
Cirbp	0.000203241		GO: Biological Process	GO:0005975	carbohydrate metabolic process		0.0003013	1	0.03482	0.3177	53	823	HKDC1,POMGNT1,SORBS1,PIGZ,SLC5A3,FUT11,MT3,ST6GALNAC3,CHID1,OGA,PTGES3,HYAL2,GLT8D1,GALNT1,SERP1,NEU2,PER2,DGAT2,ALG1,GOT2,NTSR1,STT3B,HAGH,B4GALT7,HK1,PDGFB,PDK1,PGAM1,PGK1,B4GALT5,PHKA1,UBB,KL,UGDH,UGP2,PLEK,SLC2A8,FKRP,GNPTAB,NR1D1,CREM,CRY1,PPP1R3C,NUS1,SLC25A10,IMPA1,ITPKA,POGLUT1,MOGS,SESN2,XYLB,ENO1,RPE		Frzb	0.0151486		GO: Biological Process	GO:0032355	response to estradiol		0.00323	1	0.1492	1	9	152	CCND1,SSTR2,EZH2,PTGS2,ALDH1A2,DUSP1,WNT7A,CRHBP,CD38
Ckmt1	0.0783716		GO: Biological Process	GO:0032981	mitochondrial respiratory chain complex I assembly		0.0003112	1	0.03482	0.3177	9	56	NDUFA1,NDUFA2,NDUFA3,NDUFA5,NDUFA6,NDUFB7,NDUFS6,NDUFAF3,NDUFA13		Fzd2	1.88269e-05		GO: Biological Process	GO:0030335	positive regulation of cell migration		0.003328	1	0.1501	1	18	445	IL18,SWAP70,PTGS2,BMP2,AMOT,SEMA6A,PLD1,WNT7A,PRR5,S1PR1,EDNRA,CORO1A,IGF1R,EGR1,GLIPR2,PRKD1,PAX6,IL6R
Clic6	0.00342531		GO: Biological Process	GO:0010257	NADH dehydrogenase complex assembly		0.0003112	1	0.03482	0.3177	9	56	NDUFA1,NDUFA2,NDUFA3,NDUFA5,NDUFA6,NDUFB7,NDUFS6,NDUFAF3,NDUFA13		Gab1	0.0192294		GO: Biological Process	GO:0060070	canonical Wnt signaling pathway		0.003337	1	0.1501	1	14	308	KREMEN1,RGS19,CCND1,NDP,BMP2,GLI3,WNT7A,WNT9A,LGR5,EGR1,FRZB,RSPO2,EMD,FZD2
Clstn1	0.0820262		GO: Biological Process	GO:0072657	protein localization to membrane		0.0003294	1	0.03608	0.3292	37	515	RPL32,RPL38,RPL39,RPL41,RAMP3,LIN7C,RPLP1,RPS2,RPS11,RPS15,RPS21,RPS25,KCNIP3,REEP2,CRB3,MIEF2,SORBS1,PACS1,DCHS1,DYNLL1,OGA,SRP14,GOLPH3,SSR3,EFR3A,LIN7B,ZDHHC22,WNT4,TOMM7,CPE,YWHAH,ZFAND2B,DLG1,KIF5B,NDUFA13,GOLGA7,RPL19		Gabbr2	0.0515026		GO: Biological Process	GO:0007193	adenylate cyclase-inhibiting G-protein coupled receptor signaling pathway		0.003377	1	0.1501	1	6	74	SSTR2,CHRM3,ADCY8,HTR1A,GRM2,S1PR1
Cmc1	0.0962938		GO: Biological Process	GO:0016072	rRNA metabolic process		0.0003825	1	0.04103	0.3743	23	267	RPL32,RPL38,RPL39,RPL41,RPLP1,RPS2,RPS11,RPS15,RPS21,RPS25,NOP10,NOB1,RPP38,DDX27,UTP6,RIOK3,RPP14,ABT1,BMT2,NOC4L,EIF4A3,MPHOSPH10,RPL19		Gjb6	4.05433e-09		GO: Biological Process	GO:0032970	regulation of actin filament-based process		0.00339	1	0.1501	1	15	342	CDC42EP4,SWAP70,IQGAP2,MTSS1,TMEFF2,AMOT,PKP2,WASF1,SDC4,S1PR1,VANGL2,CORO1A,CELSR1,ATP1A1,ARHGAP18
Cmc2	0.0884049		GO: Biological Process	GO:0015980	energy derivation by oxidation of organic compounds		0.0004228	1	0.04389	0.4005	24	286	SORBS1,MT3,PTGES3,NDUFA1,NDUFA2,NDUFA3,NDUFA5,NDUFA6,NDUFB7,NDUFS6,PER2,UQCR11,UQCR10,PHKA1,UBB,KL,UGP2,COX6A1,COX6B1,COX6C,COX8A,NR1D1,PPP1R3C,NDUFA13		Gldc	0.059967		GO: Biological Process	GO:0006875	cellular metal ion homeostasis		0.003433	1	0.1504	1	20	518	CYBRD1,SWAP70,CHRNA7,HEPH,SGK3,SLC8B1,GPR12,RASA3,CLSTN1,S1PR1,CRHR1,EDNRA,CCKBR,CORO1A,TMEM203,CD38,PRKD1,ATP1A1,FZD2,PLCE1
Cnpy2	0.0118893		GO: Biological Process	GO:0010563	negative regulation of phosphorus metabolic process		0.0004348	1	0.04389	0.4005	41	599	LRRK2,WDR81,KIRREL2,TRIB2,CHORDC1,ZFYVE28,TMEM132D,DYNLL1,HYAL2,MYO1D,HSPH1,NELL1,TSPO,GMFB,GNAQ,NPY2R,GRM2,OPRM1,THY1,RIMBP2,PCP4,PDGFB,CORO1C,STK38,NUP62,UBE2B,PIN1,FLRT3,PLEK,DNAJA1,SH3BP5,DUSP19,GABBR2,DNAJC3,RTN4R,LRRTM3,PMEPA1,DLG1,DUSP7,SPRED1,MPHOSPH10		Gli3	0.0699409		GO: Biological Process	GO:0008610	lipid biosynthetic process		0.003497	1	0.1508	1	24	667	HMGCS2,CHKA,PTGS2,ACSL3,BMP2,TFCP2L1,ALDH1A2,MSMO1,PIK3C2A,DHCR24,ALG5,PLD1,ALOX12B,NT5E,ETNPPL,ST3GAL1,PIGZ,LDLR,IGF1R,ST6GALNAC5,PRKD1,ATP1A1,GAB1,PLCE1
Commd1	0.0807361		GO: Biological Process	GO:0045936	negative regulation of phosphate metabolic process		0.0004348	1	0.04389	0.4005	41	599	LRRK2,WDR81,KIRREL2,TRIB2,CHORDC1,ZFYVE28,TMEM132D,DYNLL1,HYAL2,MYO1D,HSPH1,NELL1,TSPO,GMFB,GNAQ,NPY2R,GRM2,OPRM1,THY1,RIMBP2,PCP4,PDGFB,CORO1C,STK38,NUP62,UBE2B,PIN1,FLRT3,PLEK,DNAJA1,SH3BP5,DUSP19,GABBR2,DNAJC3,RTN4R,LRRTM3,PMEPA1,DLG1,DUSP7,SPRED1,MPHOSPH10		Glipr2	0.0126456		GO: Biological Process	GO:0090178	regulation of establishment of planar polarity involved in neural tube closure		0.003513	1	0.1508	1	3	16	VANGL2,CELSR1,FZD2
Coro1c	0.0510038		GO: Biological Process	GO:0006120	mitochondrial electron transport, NADH to ubiquinone		0.0005982	1	0.05922	0.5403	8	49	NDUFA1,NDUFA2,NDUFA3,NDUFA5,NDUFA6,NDUFB7,NDUFS6,NDUFA13		Golm1	0.00845666		GO: Biological Process	GO:0007187	G-protein coupled receptor signaling pathway, coupled to cyclic nucleotide second messenger		0.003623	1	0.1536	1	10	184	MC2R,SSTR2,CHRM3,ADCY8,NPY,HTR1A,GRM2,S1PR1,CRHR1,FZD2
Cox17	0.00216751		GO: Biological Process	GO:0055114	oxidation-reduction process		0.0006842	1	0.06646	0.6063	60	996	PTGR2,L2HGDH,MGST3,FDFT1,MICAL3,FMO1,FMO2,FMO5,HSDL2,P3H3,SORBS1,MT3,PTGES3,NDUFA1,NDUFA2,NDUFA3,NDUFA5,NDUFA6,NDUFB7,GFER,NDUFS6,BLVRB,PER2,DGAT2,UQCR11,CBR1,PDIA3,CYB5B,P4HA1,HADHB,HK1,UQCR10,PGAM1,PGK1,PHKA1,UBB,KL,UGDH,UGP2,TMX3,COX6A1,COX6B1,COX6C,COX8A,NR1D1,PPP1R3C,CROT,P4HTM,SLC25A10,SH3BGRL3,HEPH,DHCR24,DIO2,SESN2,CRYZL1,CCS,HIGD2A,NDUFA13,AASS,ENO1		Gpr12	0.00047245		GO: Biological Process	GO:0010891	negative regulation of sequestering of triglyceride		0.003724	1	0.1536	1	2	5	PNPLA2,PPARA
Cox6a1	0.0222739		GO: Biological Process	GO:0030001	metal ion transport		0.0007353	1	0.0701	0.6395	53	855	RAMP3,ASIC1,SLC24A3,KCNIP3,S100A1,SCN9A,ORAI2,SLC5A3,SLC8A2,MT3,ATOX1,OGA,ATP6V1G2,SRI,NEDD4,ABCC8,TSPO,GNAQ,SLC38A3,NPY,CAMK2G,NTSR1,KCNH4,OPRM1,THY1,P2RX4,SLC24A5,PDGFB,SLC5A7,ATP6V1F,CHRNA4,SLC38A2,COMMD1,STOML1,HOMER1,YWHAH,CRHR1,ATP6V0E2,TRPM4,SLC30A3,KCNK4,HEPH,KCND1,KCNH1,KCNN2,SLC17A7,DLG1,NKAIN1,KIF5B,CCS,PCSK9,HCN4,COX17		Gpr135	0.0759282		GO: Biological Process	GO:0031944	negative regulation of glucocorticoid metabolic process		0.003724	1	0.1536	1	2	5	BMP2,ATP1A1
Cox6b1	0.00667195		GO: Biological Process	GO:0072594	establishment of protein localization to organelle		0.0007775	1	0.07278	0.664	44	676	RPL32,RPL38,RPL39,RPL41,RPLP1,RPS2,LRRK2,RPS11,RPS15,RPS21,RPS25,TOMM5,IPO8,IPO7,PACS1,MT3,DYNLL1,HYAL2,HSPH1,SRI,SRP14,SSR3,NEDD4,TSPO,GNAQ,PDIA3,HK1,NUP62,ZDHHC8,TOMM7,GNPTAB,YWHAH,CTSK,CYLD,ZFAND2B,JAK2,UBE2J2,PIH1D1,SPRN,ATP5IF1,NDUFA13,TIMM13,TIMM8B,RPL19		Gpt2	2.30139e-08		GO: Biological Process	GO:0031947	negative regulation of glucocorticoid biosynthetic process		0.003724	1	0.1536	1	2	5	BMP2,ATP1A1
Cox6c	0.0626705		GO: Biological Process	GO:0042391	regulation of membrane potential		0.0008585	1	0.07781	0.7099	29	391	ASIC1,LRRK2,STX1B,SCN9A,OGA,SRI,NEDD4,STX1A,TSPO,GNAQ,NPY2R,NTSR1,KCNH4,OPRM1,P2RX4,CHRNA4,UBB,YWHAH,TRPM4,EIF4A3,PIEZO1,KCNK4,KCNH1,SLC17A7,DLG1,KIF5B,ATP5IF1,HCN4,SEZ6		Grm2	0.00371311		GO: Biological Process	GO:0003179	heart valve morphogenesis		0.003866	1	0.1572	1	4	33	FGFRL1,BMP2,JAG1,DCHS1
Cox8a	0.0176169		GO: Biological Process	GO:0000028	ribosomal small subunit assembly		0.0008824	1	0.07781	0.7099	5	20	RPL38,RPS2,RPS15,RPS25,ABT1		Hapln2	0.019901		GO: Biological Process	GO:0014031	mesenchymal cell development		0.003911	1	0.1572	1	10	186	EZH2,BMP2,ALDH1A2,JAG1,FAM83D,SEMA6A,EDNRA,VANGL2,GLIPR2,PAX6
Cpe	0.0935587		GO: Biological Process	GO:0006469	negative regulation of protein kinase activity		0.0008858	1	0.07781	0.7099	21	249	TRIB2,CHORDC1,ZFYVE28,HYAL2,NELL1,GMFB,GNAQ,THY1,PCP4,CORO1C,STK38,NUP62,FLRT3,DNAJA1,SH3BP5,DUSP19,DNAJC3,RTN4R,LRRTM3,DUSP7,SPRED1		Havcr2	0.0299751		GO: Biological Process	GO:0007565	female pregnancy		0.003966	1	0.1572	1	11	217	PCSK5,PTGS2,SLC38A2,TFCP2L1,KLF9,ADIPOR2,FOSB,CRHBP,CRHR1,HAVCR2,CD38
Crb3	0.0160718		GO: Biological Process	GO:0061077	chaperone-mediated protein folding		0.0008999	1	0.07781	0.7099	8	52	FKBP5,CHORDC1,PTGES3,HSPH1,TOR2A,PPID,PDIA4,FKBP14		Heph	2.80794e-05		GO: Biological Process	GO:0061326	renal tubule development		0.004061	1	0.1572	1	7	102	MTSS1,BMP2,GLI3,JAG1,COL4A1,LGR5,DCHS1
Crem	0.0100461		GO: Biological Process	GO:1902306	negative regulation of sodium ion transmembrane transport		0.0009149	1	0.07781	0.7099	4	12	NEDD4,COMMD1,STOML1,PCSK9		Hif3a	4.70881e-29		GO: Biological Process	GO:0042310	vasoconstriction		0.004061	1	0.1572	1	7	102	CHRM3,PTGS2,PER2,PIK3C2A,HTR1A,EDNRA,CD38
Crhr1	0.0609833		GO: Biological Process	GO:0044262	cellular carbohydrate metabolic process		0.000922	1	0.07781	0.7099	25	320	HKDC1,SORBS1,SLC5A3,MT3,OGA,PTGES3,PER2,DGAT2,ALG1,NTSR1,HK1,PDK1,PGAM1,PHKA1,UBB,UGP2,PLEK,GNPTAB,NR1D1,PPP1R3C,IMPA1,ITPKA,SESN2,XYLB,RPE		Hmgcs2	0.0668866		GO: Biological Process	GO:0033002	muscle cell proliferation		0.004062	1	0.1572	1	10	187	IL18,PTGS2,RALBP1,NOV,S1PR1,EDNRA,IGF1R,EGR1,TRIB1,IL6R
Crispld1	0.095634		GO: Biological Process	GO:0000184	nuclear-transcribed mRNA catabolic process, nonsense-mediated decay		0.0009624	1	0.07867	0.7177	13	121	RPL32,RPL38,RPL39,RPL41,RPLP1,RPS2,RPS11,RPS15,RPS21,RPS25,EIF4A3,RBM8A,RPL19		Hpcal1	0.0998971		GO: Biological Process	GO:0048660	regulation of smooth muscle cell proliferation		0.004069	1	0.1572	1	8	129	IL18,PTGS2,RALBP1,S1PR1,IGF1R,EGR1,TRIB1,IL6R
Crmp1	0.0606622		GO: Biological Process	GO:0072595	maintenance of protein localization in organelle		0.0009627	1	0.07867	0.7177	6	30	TAF8,TSPO,PDIA3,HK1,HSPA5,ANKRD13C		Hs3st1	0.0872598		GO: Biological Process	GO:0044706	multi-multicellular organism process		0.004151	1	0.1581	1	12	250	PCSK5,PTGS2,SLC38A2,TFCP2L1,KLF9,ADIPOR2,FOSB,CRHBP,CRHR1,EDNRA,HAVCR2,CD38
Crot	0.00763456		GO: Biological Process	GO:0070265	necrotic cell death		0.001024	1	0.08236	0.7514	8	53	MT3,OGA,TRADD,RIPK1,TICAM1,TSPO,UBB,CYLD		Hspa14	0.0872638		GO: Biological Process	GO:0090030	regulation of steroid hormone biosynthetic process		0.004204	1	0.1581	1	3	17	BMP2,IGF1R,ATP1A1
Cry1	0.00396268		GO: Biological Process	GO:0000271	polysaccharide biosynthetic process		0.00104	1	0.08238	0.7516	10	79	SORBS1,PTGES3,GLT8D1,PER2,ALG1,PDGFB,UBB,UGP2,NR1D1,PPP1R3C		Htr1a	0.0073884		GO: Biological Process	GO:0090177	establishment of planar polarity involved in neural tube closure		0.004204	1	0.1581	1	3	17	VANGL2,CELSR1,FZD2
Cryzl1	0.0362391		GO: Biological Process	GO:0099536	synaptic signaling		0.001075	1	0.08288	0.7562	44	687	LIN7C,ASIC1,LRRK2,STX1B,CLSTN1,SLC8A2,SNCB,PDE7B,UNC13A,SST,SSTR2,LIN7B,STX1A,PER2,TSPO,SYN1,SYP,SYT4,GNAQ,NPY,NPY2R,NTSR1,GRM2,OPRM1,P2RX4,CD38,SLC5A7,CHRM4,CHRNA4,PLCL1,HOMER1,GABBR2,YWHAH,CRHR1,EIF4A3,ITPKA,PTPRS,SLC17A7,DLG1,KIF5B,DNM1,RAC3,UNC13C,SEZ6		Htra1	0.000162272		GO: Biological Process	GO:0016055	Wnt signaling pathway		0.004472	1	0.1643	1	19	494	TRABD2B,KREMEN1,RGS19,DACT2,CCND1,NDP,BMP2,GLI3,WNT7A,WNT9A,LGR5,NXN,VANGL2,CELSR1,EGR1,FRZB,RSPO2,EMD,FZD2
Cstf1	0.0814652		GO: Biological Process	GO:0006457	protein folding		0.001096	1	0.08288	0.7562	20	236	MKKS,DNAJA4,FKBP5,CHORDC1,CDC37L1,PTGES3,ERP44,HSPH1,TOR2A,PDIA3,HSP90B1,PFDN1,PFDN2,TMX3,DNAJA1,HSPA5,PPID,PDIA4,MOGS,FKBP14		Hunk	0.00121752		GO: Biological Process	GO:0072507	divalent inorganic cation homeostasis		0.004484	1	0.1643	1	18	458	SWAP70,MTSS1,CHRNA7,SLC8B1,GPR12,RASA3,CLSTN1,S1PR1,CRHR1,EDNRA,CCKBR,CORO1A,TMEM203,CD38,PRKD1,FAM20A,FZD2,PLCE1
Cth	0.051848		GO: Biological Process	GO:0099565	chemical synaptic transmission, postsynaptic		0.00111	1	0.08288	0.7562	12	108	LRRK2,STX1B,STX1A,TSPO,NPY2R,NTSR1,OPRM1,P2RX4,CHRNA4,EIF4A3,SLC17A7,SEZ6		Id4	0.0760318		GO: Biological Process	GO:2000147	positive regulation of cell motility		0.004484	1	0.1643	1	18	458	IL18,SWAP70,PTGS2,BMP2,AMOT,SEMA6A,PLD1,WNT7A,PRR5,S1PR1,EDNRA,CORO1A,IGF1R,EGR1,GLIPR2,PRKD1,PAX6,IL6R
Ctso	0.0756342		GO: Biological Process	GO:0010940	positive regulation of necrotic cell death		0.001111	1	0.08288	0.7562	3	6	MT3,RIPK1,TSPO		Ifrd1	0.0482887		GO: Biological Process	GO:0061138	morphogenesis of a branching epithelium		0.004546	1	0.1651	1	11	221	DLG5,BMP2,GLI3,NOTCH4,COL4A1,TNC,EDNRA,VANGL2,CELSR1,DCHS1,RSPO2
Cxx1a	0.0466999		GO: Biological Process	GO:0060079	excitatory postsynaptic potential		0.001196	1	0.08796	0.8025	9	67	LRRK2,STX1B,STX1A,NPY2R,OPRM1,P2RX4,EIF4A3,SLC17A7,SEZ6		Igf1r	0.0836188		GO: Biological Process	GO:0055074	calcium ion homeostasis		0.00477	1	0.1718	1	17	425	SWAP70,CHRNA7,SLC8B1,GPR12,RASA3,CLSTN1,S1PR1,CRHR1,EDNRA,CCKBR,CORO1A,TMEM203,CD38,PRKD1,FAM20A,FZD2,PLCE1
Cxx1b	0.0218885		GO: Biological Process	GO:0010766	negative regulation of sodium ion transport		0.001281	1	0.09285	0.8471	4	13	NEDD4,COMMD1,STOML1,PCSK9		Il18	0.0998971		GO: Biological Process	GO:0002011	morphogenesis of an epithelial sheet		0.00485	1	0.1732	1	5	56	TMEFF2,JAG1,WNT7A,LCP1,VANGL2
Cxxc4	0.0978656		GO: Biological Process	GO:0033365	protein localization to organelle		0.001316	1	0.09408	0.8584	55	919	RPL32,RPL38,RPL39,RPL41,RPLP1,RPS2,LRRK2,RPS11,RPS15,RPS21,RPS25,TOMM5,IPO8,IPO7,DCTN2,PACS1,MT3,LAMTOR4,DYNLL1,HYAL2,HSPH1,SRI,SRP14,GOLPH3,SSR3,NEDD4,TAF8,TSPO,GNAQ,PDIA3,HK1,NUP62,ZDHHC8,PIN1,DNAJA1,HSPA5,TOMM7,GNPTAB,XPO1,YWHAH,CTSK,CYLD,AHI1,ZFAND2B,JAK2,RASSF5,UBE2J2,ANKRD13C,PIH1D1,SPRN,ATP5IF1,NDUFA13,TIMM13,TIMM8B,RPL19		Il6ra	0.0366774		GO: Biological Process	GO:0070884	regulation of calcineurin-NFAT signaling cascade		0.004971	1	0.1761	1	3	18	ERBB3,LMCD1,RCAN2
Cyb5b	0.0973303		GO: Biological Process	GO:0099537	trans-synaptic signaling		0.001473	1	0.1011	0.9225	43	678	LIN7C,ASIC1,LRRK2,STX1B,CLSTN1,SLC8A2,SNCB,PDE7B,UNC13A,SST,SSTR2,LIN7B,STX1A,PER2,TSPO,SYN1,SYP,SYT4,NPY,NPY2R,NTSR1,GRM2,OPRM1,P2RX4,CD38,SLC5A7,CHRM4,CHRNA4,PLCL1,HOMER1,GABBR2,YWHAH,CRHR1,EIF4A3,ITPKA,PTPRS,SLC17A7,DLG1,KIF5B,DNM1,RAC3,UNC13C,SEZ6		Inhbb	0.0989615		GO: Biological Process	GO:0044843	cell cycle G1/S phase transition		0.005159	1	0.1765	1	12	257	CDKN1A,ORC6,MCM5,MCM7,CCND1,EZH2,RHOU,CABLES1,FAM83D,ID4,E2F5,E2F6
Cyld	0.0757075		GO: Biological Process	GO:0098916	anterograde trans-synaptic signaling		0.001473	1	0.1011	0.9225	43	678	LIN7C,ASIC1,LRRK2,STX1B,CLSTN1,SLC8A2,SNCB,PDE7B,UNC13A,SST,SSTR2,LIN7B,STX1A,PER2,TSPO,SYN1,SYP,SYT4,NPY,NPY2R,NTSR1,GRM2,OPRM1,P2RX4,CD38,SLC5A7,CHRM4,CHRNA4,PLCL1,HOMER1,GABBR2,YWHAH,CRHR1,EIF4A3,ITPKA,PTPRS,SLC17A7,DLG1,KIF5B,DNM1,RAC3,UNC13C,SEZ6		Iqgap2	0.0656411		GO: Biological Process	GO:0035115	embryonic forelimb morphogenesis		0.005313	1	0.1765	1	4	36	ALDH1A2,WNT7A,WNT9A,RSPO2
Dact2	0.0466999		GO: Biological Process	GO:0007268	chemical synaptic transmission		0.001473	1	0.1011	0.9225	43	678	LIN7C,ASIC1,LRRK2,STX1B,CLSTN1,SLC8A2,SNCB,PDE7B,UNC13A,SST,SSTR2,LIN7B,STX1A,PER2,TSPO,SYN1,SYP,SYT4,NPY,NPY2R,NTSR1,GRM2,OPRM1,P2RX4,CD38,SLC5A7,CHRM4,CHRNA4,PLCL1,HOMER1,GABBR2,YWHAH,CRHR1,EIF4A3,ITPKA,PTPRS,SLC17A7,DLG1,KIF5B,DNM1,RAC3,UNC13C,SEZ6		Itih5	0.0824392		GO: Biological Process	GO:0050808	synapse organization		0.005318	1	0.1765	1	12	258	ZMYND8,SLITRK1,AMIGO2,COL4A1,CACNB2,HTR1A,PCDHGC5,PCDHGC4,TNC,WNT7A,CLSTN1,KY
Dagla	0.0466999		GO: Biological Process	GO:0031958	corticosteroid receptor signaling pathway		0.001737	1	0.1161	1	5	23	PTGES3,NEDD4,YWHAH,CRY1,JAK2		Jag1	0.0558158		GO: Biological Process	GO:0003012	muscle system process		0.005348	1	0.1765	1	17	430	TPM3,SSTR2,EZH2,CHRM3,PTGS2,PIK3C2A,PKP2,CACNB2,LMCD1,KLF15,EDNRA,MLIP,EMD,ATP1A1,AKAP1,MAP2K6,PLCE1
Daglb	0.0783716		GO: Biological Process	GO:0046339	diacylglycerol metabolic process		0.001737	1	0.1161	1	4	14	DGAT2,DAGLA,DGKK,PLCE1		Kcna6	0.0840364		GO: Biological Process	GO:0055082	cellular chemical homeostasis		0.005359	1	0.1765	1	26	768	CYBRD1,SWAP70,GJB6,CHRNA7,HEPH,SGK3,SLC8B1,PTPRN2,SLC17A7,GPR12,ATP6V0E1,RASA3,CLSTN1,S1PR1,CRHR1,EDNRA,CCKBR,CORO1A,IGF1R,TMEM203,CD38,PRKD1,ATP1A1,FZD2,SLC4A11,PLCE1
Dbi	0.0570924		GO: Biological Process	GO:0006612	protein targeting to membrane		0.001759	1	0.1161	1	17	194	RPL32,RPL38,RPL39,RPL41,RPLP1,RPS2,RPS11,RPS15,RPS21,RPS25,MIEF2,PACS1,OGA,SRP14,SSR3,ZFAND2B,RPL19		Kcnc4	0.0851936		GO: Biological Process	GO:0009611	response to wounding		0.005435	1	0.1765	1	31	967	ERBB3,IL18,MAS1,BCL6,EZH2,PTGS2,CHRNA7,TMEFF2,XYLT1,STXBP3,GLI3,MERTK,SDC4,ADIPOR2,NOV,NT5E,TNC,WNT7A,PPARA,LCP1,LDLR,EDNRA,VANGL2,IFRD1,SCUBE1,CELSR1,IGF1R,PAX6,AKAP1,CX3CR1,CD276
Dbpht2	0.0814652		GO: Biological Process	GO:0007005	mitochondrion organization		0.001821	1	0.1187	1	47	767	CHAF1B,LRRK2,FUNDC1,TOMM5,FAM13B,MEX3C,MIEF2,MRPS28,MRPS18B,UQCC2,CHCHD6,DYNLL1,DKKL1,SPG7,GOLPH3,NDUFA1,NDUFA2,NDUFA3,NDUFA5,NDUFA6,NDUFB7,NDUFS6,TMEM11,TSPO,ATG12,C19orf70,PDK1,UQCR10,ZDHHC8,MRPS21,MRPL50,TOMM7,NDUFAF3,COX8A,YWHAH,CTSK,UBE2J2,SESN2,AURKAIP1,ATP5IF1,HIGD2A,MRPL52,MRPL2,NDUFA13,TIMM13,TIMM8B,EPAS1		Kcnd1	0.0104463		GO: Biological Process	GO:0060029	convergent extension involved in organogenesis		0.005513	1	0.1765	1	2	6	VANGL2,FRZB
Dbt	0.00974359		GO: Biological Process	GO:0031400	negative regulation of protein modification process		0.00185	1	0.119	1	42	666	LRRK2,WDR81,KIRREL2,HHATL,TRIB2,KLHL40,CHORDC1,ZFYVE28,TMEM132D,OGA,HYAL2,MYO1D,HSPH1,NELL1,PER2,TSPO,GMFB,GNAQ,THY1,RIMBP2,PCP4,CORO1C,STK38,NUP62,UBB,UBE2B,PIN1,FLRT3,DNAJA1,SH3BP5,DUSP19,CRY1,DNAJC3,RTN4R,PSMA7,LRRTM3,PMEPA1,DLG1,PIH1D1,DUSP7,SPRED1,MPHOSPH10		Kcnf1	0.096429		GO: Biological Process	GO:0003149	membranous septum morphogenesis		0.005513	1	0.1765	1	2	6	VANGL2,FZD2
Dcst1	0.0898927		GO: Biological Process	GO:0098662	inorganic cation transmembrane transport		0.001902	1	0.1202	1	42	667	ASIC1,SLC24A3,KCNIP3,S100A1,SCN9A,ORAI2,SLC8A2,ATOX1,ATP5F1E,ATP5ME,ATP5PF,SRI,NEDD4,ABCC8,UQCR11,NTSR1,KCNH4,OPRM1,THY1,SLC24A5,ATP6V1F,UQCR10,COMMD1,STOML1,COX6A1,COX6B1,COX6C,COX8A,YWHAH,CRHR1,ATP6V0E2,TRPM4,SLC30A3,KCNK4,KCND1,KCNH1,KCNN2,SLC17A7,DLG1,KIF5B,PCSK9,HCN4		Kcnh1	0.0515045		GO: Biological Process	GO:0090032	negative regulation of steroid hormone biosynthetic process		0.005513	1	0.1765	1	2	6	BMP2,ATP1A1
Dctn2	0.0939364		GO: Biological Process	GO:1905114	cell surface receptor signaling pathway involved in cell-cell signaling		0.001914	1	0.1202	1	12	115	LRRK2,STX1B,STX1A,TSPO,NPY2R,NTSR1,OPRM1,P2RX4,CHRNA4,EIF4A3,SLC17A7,SEZ6		Kcnn2	0.00169805		GO: Biological Process	GO:0009169	purine ribonucleoside monophosphate catabolic process		0.005513	1	0.1765	1	2	6	AMPD3,NT5E
Ddx27	0.00175056		GO: Biological Process	GO:0051220	cytoplasmic sequestering of protein		0.001996	1	0.1238	1	7	46	DZIP1,SRI,TSPO,PDIA3,HK1,HSPA5,ANKRD13C		Kcns2	0.0609979		GO: Biological Process	GO:0009158	ribonucleoside monophosphate catabolic process		0.005513	1	0.1765	1	2	6	AMPD3,NT5E
Dgat2	0.0941937		GO: Biological Process	GO:0010842	retina layer formation		0.002123	1	0.1301	1	5	24	HIPK1,PROM1,TSPAN12,AHI1,FJX1		Kctd5	0.0167675		GO: Biological Process	GO:0048732	gland development		0.00552	1	0.1765	1	19	504	CDO1,CEBPA,CCND1,HMGCS2,EZH2,BMP2,TFCP2L1,ALDH1A2,GLI3,AK4,NOTCH4,PCSK9,TNC,ID4,CRHR1,CCKBR,IGF1R,FRZB,PAX6
Dgkk	0.00716962		GO: Biological Process	GO:0042254	ribosome biogenesis		0.002169	1	0.1314	1	24	322	RPL32,RPL38,RPL39,RPL41,RPLP1,RPS2,RPS11,RPS15,RPS21,RPS25,NOP10,NOB1,RPP38,DDX27,UTP6,RIOK3,RPP14,ABT1,BMT2,NOC4L,XPO1,EIF4A3,MPHOSPH10,RPL19		Kdelc2	0.0544176		GO: Biological Process	GO:0055123	digestive system development		0.005525	1	0.1765	1	9	165	CDKN1A,PCSK5,HMGCS2,ALDH1A2,GLI3,CCKBR,VANGL2,IGF1R,DCHS1
Dhcr24	0.0115304		GO: Biological Process	GO:0021762	substantia nigra development		0.002268	1	0.1357	1	7	47	S100A1,BASP1,DYNLL1,ATP5PF,HSPA5,COX6B1,YWHAH		Kif21b	0.0840364		GO: Biological Process	GO:0042249	establishment of planar polarity of embryonic epithelium		0.005818	1	0.1833	1	3	19	VANGL2,CELSR1,FZD2
Dhx29	0.0893949		GO: Biological Process	GO:0034315	regulation of Arp2/3 complex-mediated actin nucleation		0.002296	1	0.1358	1	4	15	BRK1,ARFIP1,GMFB,WASF1		Kirrel2	7.67285e-08		GO: Biological Process	GO:0051591	response to cAMP		0.005833	1	0.1833	1	7	109	CDO1,HMGCS2,FOSB,DUSP1,CREM,CRHBP,AKAP1
Dio2	0.0222739		GO: Biological Process	GO:1902803	regulation of synaptic vesicle transport		0.002585	1	0.1496	1	6	36	LRRK2,STX1B,UNC13A,STX1A,SYN1,DNM1		Klf13	0.0989615		GO: Biological Process	GO:0048016	inositol phosphate-mediated signaling		0.005866	1	0.1833	1	4	37	ERBB3,LMCD1,RCAN2,PLCE1
Diras2	0.0898927		GO: Biological Process	GO:0009266	response to temperature stimulus		0.002591	1	0.1496	1	19	236	DNAJA4,FGF1,CHORDC1,PTGES3,ARPP21,HSPH1,SST,XYLT1,MLST8,CAMK2G,NTSR1,NUP62,CIRBP,DNAJA1,DNAJC3,KCNK4,POM121,DIO2,EPHB1		Klf15	0.020466		GO: Biological Process	GO:0048661	positive regulation of smooth muscle cell proliferation		0.00594	1	0.1843	1	6	83	IL18,PTGS2,S1PR1,IGF1R,EGR1,IL6R
Dixdc1	0.0188931		GO: Biological Process	GO:0051899	membrane depolarization		0.002615	1	0.1496	1	11	104	LRRK2,SCN9A,OGA,TSPO,NTSR1,P2RX4,CHRNA4,YWHAH,TRPM4,ATP5IF1,HCN4		Klf9	6.01384e-05		GO: Biological Process	GO:0098655	cation transmembrane transport		0.006218	1	0.1911	1	25	738	ATP6AP1,CHRNA4,CHRNA7,SLC8B1,KCNA6,KCNC4,KCND1,PIK3C2A,KCNF1,KCNH1,KCNN2,SLC17A7,KCNS2,PCSK9,CACNB2,ATP6V0E1,RASA3,ANO10,CRHR1,EDNRA,CORO1A,CNKSR3,PRKD1,ATP1A1,SLC4A11
Dkkl1	0.0630565		GO: Biological Process	GO:0006123	mitochondrial electron transport, cytochrome c to oxygen		0.002967	1	0.1678	1	4	16	COX6A1,COX6B1,COX6C,COX8A		Klhdc7a	2.12199e-07		GO: Biological Process	GO:0061333	renal tubule morphogenesis		0.006294	1	0.1911	1	6	84	MTSS1,BMP2,GLI3,COL4A1,LGR5,DCHS1
Dlg1	0.0606622		GO: Biological Process	GO:0033673	negative regulation of kinase activity		0.002998	1	0.1678	1	21	275	TRIB2,CHORDC1,ZFYVE28,HYAL2,NELL1,GMFB,GNAQ,THY1,PCP4,CORO1C,STK38,NUP62,FLRT3,DNAJA1,SH3BP5,DUSP19,DNAJC3,RTN4R,LRRTM3,DUSP7,SPRED1		Kremen1	0.090267		GO: Biological Process	GO:0014033	neural crest cell differentiation		0.006294	1	0.1911	1	6	84	ALDH1A2,JAG1,SEMA6A,EDNRA,FRZB,PAX6
Dlk2	0.0773852		GO: Biological Process	GO:2000300	regulation of synaptic vesicle exocytosis		0.003079	1	0.1705	1	5	26	LRRK2,STX1B,UNC13A,STX1A,SYN1		Ky	0.0812396		GO: Biological Process	GO:0042157	lipoprotein metabolic process		0.006353	1	0.1915	1	8	139	ZDHHC8,ALG5,ALOX12B,PCSK9,PPARA,PIGZ,LDLR,ZDHHC22
Dlx6as1	0.0814652		GO: Biological Process	GO:0043269	regulation of ion transport		0.003466	1	0.1898	1	41	669	KCNIP3,S100A1,SCN9A,LRRC8C,OGA,RIPK1,SRI,FXYD7,NEDD4,PER2,ABCC8,TSPO,GNAQ,SLC38A3,NPY2R,CAMK2G,NTSR1,CLIC6,KCNH4,OPRM1,THY1,P2RX4,PCP4,HK1,PDGFB,CHRNA4,COMMD1,STOML1,HOMER1,YWHAH,CRHR1,KCNK4,KCND1,KCNH1,KCNN2,DLG1,NKAIN1,KIF5B,PCSK9,HCN4,LRRC8D		L1cam	0.0483563		GO: Biological Process	GO:0003197	endocardial cushion development		0.006456	1	0.1932	1	4	38	ERBB3,BMP2,JAG1,DCHS1
Dnaja1	0.0783716		GO: Biological Process	GO:1902600	proton transmembrane transport		0.003513	1	0.1904	1	11	108	ATP5F1E,ATP5ME,ATP5PF,UQCR11,ATP6V1F,UQCR10,COX6A1,COX6B1,COX6C,COX8A,ATP6V0E2		Lasp1	0.0411292		GO: Biological Process	GO:0040017	positive regulation of locomotion		0.006751	1	0.2007	1	18	477	IL18,SWAP70,PTGS2,BMP2,AMOT,SEMA6A,PLD1,WNT7A,PRR5,S1PR1,EDNRA,CORO1A,IGF1R,EGR1,GLIPR2,PRKD1,PAX6,IL6R
Dnaja4	0.0358018		GO: Biological Process	GO:0045859	regulation of protein kinase activity		0.003717	1	0.1993	1	46	775	RPLP1,LRRK2,KITLG,FGF1,SDC4,TRIB2,LAMTOR2,CHORDC1,ZFYVE28,MT3,HYAL2,RIPK1,HSPH1,RIPK2,NELL1,GMFB,GNAQ,GNG3,PSRC1,CCND2,CCNG1,THY1,PCP4,PDGFB,CORO1C,STK38,NUP62,UBB,FLRT3,DNAJA1,HSPA5,SH3BP5,DUSP19,MAP2K3,DNAJC3,DIRAS2,RTN4R,CCNQP1,LRRTM3,JAK2,DLG1,SESN2,PIH1D1,DUSP7,SPRED1,PLCE1		Lcp1	0.074287		GO: Biological Process	GO:0009914	hormone transport		0.006915	1	0.2011	1	15	370	INHBB,NELL2,SLC8B1,STXBP3,PER2,PTPRN2,DIO2,NOV,HTR1A,CRHBP,CRHR1,CCKBR,SLC16A2,CD38,PAX6
Dnajc17	0.0466999		GO: Biological Process	GO:0008154	actin polymerization or depolymerization		0.003902	1	0.2071	1	16	192	MKKS,MICAL3,FHOD3,BRK1,ARFIP1,GMFB,MLST8,WASF1,TMOD1,CFL2,PLEK,SH3BGRL3,SPIRE1,TWF1,JAK2,DLG1		Ldlr	0.00314911		GO: Biological Process	GO:0031099	regeneration		0.006923	1	0.2011	1	10	202	CDKN1A,CCND1,EZH2,XYLT1,NOV,TNC,WNT7A,LCP1,IFRD1,IGF1R
Dnajc3	0.0219331		GO: Biological Process	GO:0070585	protein localization to mitochondrion		0.004105	1	0.2085	1	16	193	LRRK2,TOMM5,DYNLL1,HSPH1,TSPO,HK1,ZDHHC8,DNAJA1,TOMM7,YWHAH,CTSK,UBE2J2,ATP5IF1,NDUFA13,TIMM13,TIMM8B		Lfng	0.0192294		GO: Biological Process	GO:0071695	anatomical structure maturation		0.006976	1	0.2011	1	5	61	PTGS2,BMP2,ALDH1A2,S1PR1,DCHS1
Dnm1	0.0884049		GO: Biological Process	GO:0019083	viral transcription		0.004148	1	0.2085	1	15	176	RPL32,RPL38,RPL39,RPL41,RPLP1,RPS2,RPS11,RPS15,RPS21,RPS25,GTF2F1,NUP62,TRIM11,POM121,RPL19		Lgr5	0.0610656		GO: Biological Process	GO:0030036	actin cytoskeleton organization		0.007013	1	0.2011	1	21	591	CDC42EP4,SWAP70,IQGAP2,MTSS1,OBSCN,BCL6,RHOU,TMEFF2,FARP2,AMOT,TESK2,WASF1,SDC4,MAP3K19,PRR5,LCP1,S1PR1,VANGL2,CORO1A,CELSR1,ARHGAP18
Dsel	0.0757075		GO: Biological Process	GO:0006094	gluconeogenesis		0.004165	1	0.2085	1	10	95	PER2,DGAT2,GOT2,PGAM1,PGK1,NR1D1,CRY1,SLC25A10,SESN2,ENO1		Lhfpl2	0.0022751		GO: Biological Process	GO:0032231	regulation of actin filament bundle assembly		0.007046	1	0.2011	1	6	86	SWAP70,MTSS1,TMEFF2,AMOT,SDC4,S1PR1
Dusp19	0.0854736		GO: Biological Process	GO:0032507	maintenance of protein location in cell		0.004165	1	0.2085	1	10	95	DZIP1,SRI,GOLPH3,TAF8,TSPO,PDIA3,HK1,HSPA5,TWF1,ANKRD13C		Lin9	0.0644087		GO: Biological Process	GO:0002366	leukocyte activation involved in immune response		0.007128	1	0.2011	1	11	235	SWAP70,BCL6,STXBP3,PLCL2,APBB1IP,LCP1,CRHR1,LFNG,HAVCR2,CORO1A,CX3CR1
Dusp7	0.00913107		GO: Biological Process	GO:1903332	regulation of protein folding		0.004269	1	0.2085	1	3	9	PDIA3,HSPA5,PDIA4		Lmcd1	0.0151486		GO: Biological Process	GO:0031667	response to nutrient levels		0.007143	1	0.2011	1	21	592	CDKN1A,INHBB,CCND1,HMGCS2,SSTR2,ZDHHC8,PTGS2,CHRNA7,ACSL3,SLC38A2,RAB33A,ALDH1A2,PIK3C2A,ADIPOR2,NPY,PCSK9,ATP6V0E1,ADAMTS1,TNC,RRP8,PPARA
Dync1h1	0.0787817		GO: Biological Process	GO:0010807	regulation of synaptic vesicle priming		0.004269	1	0.2085	1	3	9	STX1B,UNC13A,STX1A		Lmtk2	0.0984975		GO: Biological Process	GO:0032956	regulation of actin cytoskeleton organization		0.007173	1	0.2011	1	13	302	CDC42EP4,SWAP70,IQGAP2,MTSS1,TMEFF2,AMOT,WASF1,SDC4,S1PR1,VANGL2,CORO1A,CELSR1,ARHGAP18
Dync1i1	0.0814652		GO: Biological Process	GO:0010939	regulation of necrotic cell death		0.004312	1	0.2085	1	5	28	MT3,TRADD,RIPK1,TSPO,UBB		Lonrf3	4.33507e-07		GO: Biological Process	GO:0031214	biomineral tissue development		0.007198	1	0.2011	1	8	142	MTSS1,PTGS2,BMP2,PPARA,S1PR1,RSPO2,FAM20A,CD276
Dynll1	0.00216751		GO: Biological Process	GO:0043687	post-translational protein modification		0.00446	1	0.2085	1	6	40	ARSK,FOLH1,ARSG,FN3K,STT3B,ATG12		Lrrc1	0.00161985		GO: Biological Process	GO:0007507	heart development		0.007275	1	0.2011	1	21	593	PCSK5,ERBB3,FGFRL1,BMP2,FREM2,ALDH1A2,GLI3,JAG1,PKP2,FHL2,ADIPOR2,ADAMTS1,PPARA,S1PR1,EDNRA,VANGL2,SCUBE1,DCHS1,FZD2,GAB1,PLCE1
Dzip1	0.0505168		GO: Biological Process	GO:0034637	cellular carbohydrate biosynthetic process		0.004488	1	0.2085	1	9	81	SORBS1,PTGES3,PER2,ALG1,UBB,UGP2,NR1D1,PPP1R3C,IMPA1		Lrrc10b	0.064188		GO: Biological Process	GO:0048863	stem cell differentiation		0.007365	1	0.2011	1	13	303	EZH2,BMP2,ALDH1A2,JAG1,NFYA,FAM83D,SEMA6A,WNT7A,EDNRA,VANGL2,FRZB,GLIPR2,PAX6
E2f5	0.0055264		GO: Biological Process	GO:0045338	farnesyl diphosphate metabolic process		0.004523	1	0.2085	1	2	3	FDFT1,GGPS1		Lrrc33	0.0916318		GO: Biological Process	GO:0001763	morphogenesis of a branching structure		0.007575	1	0.2011	1	11	237	DLG5,BMP2,GLI3,NOTCH4,COL4A1,TNC,EDNRA,VANGL2,CELSR1,DCHS1,RSPO2
E2f6	0.00551436		GO: Biological Process	GO:0015680	intracellular copper ion transport		0.004523	1	0.2085	1	2	3	ATOX1,CCS		Lrrc55	0.0260871		GO: Biological Process	GO:0002263	cell activation involved in immune response		0.007575	1	0.2011	1	11	237	SWAP70,BCL6,STXBP3,PLCL2,APBB1IP,LCP1,CRHR1,LFNG,HAVCR2,CORO1A,CX3CR1
Efr3a	0.0950436		GO: Biological Process	GO:0006065	UDP-glucuronate biosynthetic process		0.004523	1	0.2085	1	2	3	UGDH,UGP2		Lrrc58	0.00155211		GO: Biological Process	GO:0021798	forebrain dorsal/ventral pattern formation		0.007618	1	0.2011	1	2	7	GLI3,PAX6
Egfl7	0.0554796		GO: Biological Process	GO:0071492	cellular response to UV-A		0.004523	1	0.2085	1	2	3	MME,PPID		Lrrc8c	6.97048e-06		GO: Biological Process	GO:0031946	regulation of glucocorticoid biosynthetic process		0.007618	1	0.2011	1	2	7	BMP2,ATP1A1
Eif4a3	0.0785038		GO: Biological Process	GO:1903334	positive regulation of protein folding		0.004523	1	0.2085	1	2	3	PDIA3,PDIA4		Lrrc8d	0.0155908		GO: Biological Process	GO:0006769	nicotinamide metabolic process		0.007618	1	0.2011	1	2	7	PTGS2,NUDT12
Eme2	0.0527802		GO: Biological Process	GO:1902305	regulation of sodium ion transmembrane transport		0.004537	1	0.2085	1	7	53	NEDD4,COMMD1,STOML1,YWHAH,DLG1,KIF5B,PCSK9		Map2k6	0.0234722		GO: Biological Process	GO:0009128	purine nucleoside monophosphate catabolic process		0.007618	1	0.2011	1	2	7	AMPD3,NT5E
Emx1	0.0220718		GO: Biological Process	GO:0006605	protein targeting		0.00477	1	0.2173	1	43	723	RPL32,RPL38,RPL39,RPL41,RPLP1,RPS2,LRRK2,RPS11,RPS15,RPS21,RPS25,TOMM5,MIEF2,IPO8,IPO7,PACS1,MT3,OGA,HYAL2,SRI,SRP14,SSR3,NEDD4,TSPO,GNAQ,PDIA3,STXBP4,NUP62,ZDHHC8,TOMM7,GNPTAB,PPP1R3C,CTSK,CYLD,ZFAND2B,JAK2,UBE2J2,SPRN,ATP5IF1,NDUFA13,TIMM13,TIMM8B,RPL19		Map3k19	0.0575582		GO: Biological Process	GO:0070995	NADPH oxidation		0.007618	1	0.2011	1	2	7	FMO1,FMO2
Ephb1	0.0557009		GO: Biological Process	GO:0008543	fibroblast growth factor receptor signaling pathway		0.004966	1	0.2224	1	11	113	FGF1,FGFRL1,GTF2F1,FIBP,PDGFB,WNT4,HNRNPH1,UBB,KL,FLRT3,SPRED1		Map3k6	1.96317e-26		GO: Biological Process	GO:0017144	drug metabolic process		0.007752	1	0.2012	1	4	40	FMO1,FMO2,FMO5,NT5C2
Ephb6	0.0395805		GO: Biological Process	GO:0005978	glycogen biosynthetic process		0.005039	1	0.2224	1	7	54	SORBS1,PTGES3,PER2,UBB,UGP2,NR1D1,PPP1R3C		Mas1	0.0609979		GO: Biological Process	GO:0071800	podosome assembly		0.007757	1	0.2012	1	3	21	FARP2,BIN2,LCP1
Epyc	0.0455046		GO: Biological Process	GO:0009250	glucan biosynthetic process		0.005039	1	0.2224	1	7	54	SORBS1,PTGES3,PER2,UBB,UGP2,NR1D1,PPP1R3C		Mc2r	0.0167675		GO: Biological Process	GO:0006024	glycosaminoglycan biosynthetic process		0.007765	1	0.2012	1	7	115	NDST4,B4GALT5,XYLT1,CHST15,HS3ST1,SDC4,ST3GAL1
Erp44	0.0941672		GO: Biological Process	GO:0006739	NADP metabolic process		0.005054	1	0.2224	1	6	41	FMO1,FMO2,NADK2,PGAM1,NUDT12,RPE		Mcm5	0.0101255		GO: Biological Process	GO:0006874	cellular calcium ion homeostasis		0.00781	1	0.2012	1	16	411	SWAP70,CHRNA7,SLC8B1,GPR12,RASA3,CLSTN1,S1PR1,CRHR1,EDNRA,CCKBR,CORO1A,TMEM203,CD38,PRKD1,FZD2,PLCE1
Ewsr1	0.0639647		GO: Biological Process	GO:0016049	cell growth		0.00519	1	0.2264	1	35	562	ACTA1,MEX3C,OLFM1,FBLN5,LAMTOR2,CLSTN1,MT3,RAB21,UNC13A,HYAL2,FSTL4,SYT4,TMEM97,SEMA4A,PSRC1,FAM107A,CD38,H3F3A,H3F3B,CDH4,PDGFB,CADM1,PIN1,FLRT3,IFRD1,ATP6V0E2,CTH,HTRA1,RTN4R,EPYC,NDUFA13,ATAD3A,EMX1,ENO1,PLCE1		Mcm7	0.0688574		GO: Biological Process	GO:0043410	positive regulation of MAPK cascade		0.007912	1	0.2026	1	19	522	ATP6AP1,NTSR2,EZH2,CHRNA7,BMP2,TNFRSF19,ALOX12B,WNT7A,MAP3K6,EDNRA,VANGL2,HAVCR2,IGF1R,GLIPR2,MAP2K6,DIRAS2,IL6R,GAB1,PLCE1
Extl2	0.0897328		GO: Biological Process	GO:0033692	cellular polysaccharide biosynthetic process		0.005577	1	0.2396	1	8	69	SORBS1,PTGES3,PER2,ALG1,UBB,UGP2,NR1D1,PPP1R3C		Med27	0.085368		GO: Biological Process	GO:0006023	aminoglycan biosynthetic process		0.008128	1	0.2069	1	7	116	NDST4,B4GALT5,XYLT1,CHST15,HS3ST1,SDC4,ST3GAL1
Faah	0.0783716		GO: Biological Process	GO:0019319	hexose biosynthetic process		0.005585	1	0.2396	1	10	99	PER2,DGAT2,GOT2,PGAM1,PGK1,NR1D1,CRY1,SLC25A10,SESN2,ENO1		Mertk	0.00140473		GO: Biological Process	GO:0007420	brain development		0.008188	1	0.207	1	25	755	DLG5,MAS1,HMGCS2,SSTR2,EZH2,ACSL3,SLC38A2,BMP2,ALDH1A2,STXBP3,GLI3,NME5,SLC17A7,AK4,NPY,COL4A1,NT5E,WNT7A,ID4,POU3F1,S1PR1,IGF1R,PAFAH1B3,PAX6,CX3CR1
Fabp7	0.00109368		GO: Biological Process	GO:0001933	negative regulation of protein phosphorylation		0.005815	1	0.24	1	28	426	LRRK2,KIRREL2,TRIB2,CHORDC1,ZFYVE28,HYAL2,HSPH1,NELL1,GMFB,GNAQ,THY1,PCP4,CORO1C,STK38,NUP62,UBE2B,PIN1,FLRT3,DNAJA1,SH3BP5,DUSP19,DNAJC3,RTN4R,LRRTM3,PMEPA1,DLG1,DUSP7,SPRED1		Mfsd2a	2.9993e-12		GO: Biological Process	GO:0001944	vasculature development		0.008233	1	0.207	1	23	677	PCSK5,IL18,NDP,PTGS2,CHRNA7,ALDH1A2,AMOT,GLI3,JAG1,ADIPOR2,NOTCH4,NOV,COL4A1,ADAMTS1,WNT7A,HIF3A,S1PR1,EDNRA,VANGL2,EGR1,PRKD1,PAX6,CX3CR1
Fam107a	0.00175056		GO: Biological Process	GO:0032008	positive regulation of TOR signaling		0.005861	1	0.24	1	5	30	LAMTOR2,LAMTOR4,GOLPH3,MLST8,PIH1D1		Mfsd4	0.0155908		GO: Biological Process	GO:0032869	cellular response to insulin stimulus		0.008429	1	0.2078	1	10	208	ATP6AP1,INHBB,HMGCS2,PIK3C2A,UCHL3,PCSK9,ATP6V0E1,SLC25A33,IGF1R,GAB1
Fam107b	0.0696563		GO: Biological Process	GO:0090394	negative regulation of excitatory postsynaptic potential		0.005922	1	0.24	1	3	10	LRRK2,NPY2R,EIF4A3		Micalcl	0.0296778		GO: Biological Process	GO:0046683	response to organophosphorus		0.008453	1	0.2078	1	8	146	CDO1,HMGCS2,PTGS2,FOSB,DUSP1,CREM,CRHBP,AKAP1
Fam13b	0.0856406		GO: Biological Process	GO:0016188	synaptic vesicle maturation		0.005922	1	0.24	1	3	10	UNC13A,SYP,SLC17A7		Mlip	0.0599508		GO: Biological Process	GO:0003170	heart valve development		0.008459	1	0.2078	1	4	41	FGFRL1,BMP2,JAG1,DCHS1
Fam163b	0.0422796		GO: Biological Process	GO:0051938	L-glutamate import		0.005922	1	0.24	1	3	10	PER2,NTSR1,SLC17A7		Mlph	0.000837288		GO: Biological Process	GO:0006739	NADP metabolic process		0.008459	1	0.2078	1	4	41	NADK2,NUDT12,FMO1,FMO2
Fam3a	0.0421581		GO: Biological Process	GO:0035437	maintenance of protein localization in endoplasmic reticulum		0.005922	1	0.24	1	3	10	PDIA3,HSPA5,ANKRD13C		Mpp7	0.00630689		GO: Biological Process	GO:0035239	tube morphogenesis		0.008525	1	0.2082	1	16	415	DLG5,MTSS1,BMP2,ALDH1A2,GLI3,SDC4,NOTCH4,COL4A1,TNC,LGR5,EDNRA,VANGL2,CELSR1,DCHS1,RSPO2,FZD2
Fam58b	0.0557009		GO: Biological Process	GO:0016081	synaptic vesicle docking		0.005922	1	0.24	1	3	10	STX1B,UNC13A,STX1A		Mtss1	0.00265066		GO: Biological Process	GO:0051384	response to glucocorticoid		0.00861	1	0.2083	1	9	177	CDKN1A,CDO1,CCND1,HMGCS2,SSTR2,PTGS2,KLF9,FOSB,DUSP1
Fam78a	0.0751429		GO: Biological Process	GO:0098660	inorganic ion transmembrane transport		0.00605	1	0.2433	1	44	754	ASIC1,SLC24A3,KCNIP3,S100A1,SCN9A,ORAI2,SLC8A2,ATOX1,ATP5F1E,ATP5ME,ATP5PF,SRI,NEDD4,ABCC8,UQCR11,NTSR1,CLIC6,KCNH4,OPRM1,THY1,SLC24A5,ATP6V1F,UQCR10,COMMD1,STOML1,COX6A1,COX6B1,COX6C,COX8A,YWHAH,CRHR1,ATP6V0E2,SLC25A10,TRPM4,SLC30A3,KCNK4,KCND1,KCNH1,KCNN2,SLC17A7,DLG1,KIF5B,PCSK9,HCN4		Mtss1l	0.0620193		GO: Biological Process	GO:0001934	positive regulation of protein phosphorylation		0.008625	1	0.2083	1	30	959	CDKN1A,ERBB3,IL18,ATP6AP1,INHBB,MAS1,NTSR2,CCND1,EZH2,ADCY8,CHRNA7,BMP2,TNFRSF19,SDC4,ALOX12B,WNT7A,PRR5,MAP3K6,EDNRA,VANGL2,HAVCR2,IGF1R,GLIPR2,PRKD1,FAM20A,MAP2K6,DIRAS2,IL6R,GAB1,PLCE1
Fbln5	0.049863		GO: Biological Process	GO:0008064	regulation of actin polymerization or depolymerization		0.00669	1	0.267	1	14	168	MKKS,FHOD3,BRK1,ARFIP1,GMFB,MLST8,WASF1,TMOD1,CFL2,PLEK,SH3BGRL3,SPIRE1,TWF1,DLG1		Mum1l1	0.000162272		GO: Biological Process	GO:0071705	nitrogen compound transport		0.008746	1	0.21	1	28	879	SLC29A3,IL18,INHBB,SLC29A2,PTGS2,CHRNA4,CHRNA7,SLC38A2,SLC8B1,STXBP3,PER2,PTPRN2,DIO2,SLC17A7,NOV,HTR1A,SLC25A33,GRM2,CRHBP,CRHR1,EDNRA,CCKBR,AZIN1,SLC7A8,SLC16A2,SLC25A13,CD38,PAX6
Fbxl2	0.0941937		GO: Biological Process	GO:0042921	glucocorticoid receptor signaling pathway		0.00697	1	0.2718	1	4	20	PTGES3,NEDD4,YWHAH,CRY1		Mxd4	0.00103848		GO: Biological Process	GO:0060322	head development		0.009168	1	0.2189	1	26	802	DLG5,MAS1,HMGCS2,SSTR2,EZH2,ACSL3,SLC38A2,BMP2,ALDH1A2,STXBP3,GLI3,NME5,SLC17A7,AK4,NPY,COL4A1,NT5E,WNT7A,ID4,POU3F1,S1PR1,EDNRA,IGF1R,PAFAH1B3,PAX6,CX3CR1
Fbxl6	0.0630565		GO: Biological Process	GO:0034383	low-density lipoprotein particle clearance		0.00697	1	0.2718	1	4	20	CNPY2,DGAT2,PCSK9,LDLR		Nadkd1	0.0320409		GO: Biological Process	GO:0043588	skin development		0.009392	1	0.223	1	12	278	DACT2,PTGS2,DHCR24,JAG1,TNFRSF19,ALOX12B,WNT7A,POU3F1,LGR5,VANGL2,CELSR1,PAX6
Fbxo34	0.065748		GO: Biological Process	GO:0033605	positive regulation of catecholamine secretion		0.00697	1	0.2718	1	4	20	STX1A,NPY2R,PCP4,CHRNA4		Ndp	0.0955738		GO: Biological Process	GO:0061035	regulation of cartilage development		0.00968	1	0.2268	1	5	66	ZBTB16,BMP2,GLI3,WNT9A,FRZB
Fbxo46	0.091179		GO: Biological Process	GO:0030832	regulation of actin filament length		0.007039	1	0.2725	1	14	169	MKKS,FHOD3,BRK1,ARFIP1,GMFB,MLST8,WASF1,TMOD1,CFL2,PLEK,SH3BGRL3,SPIRE1,TWF1,DLG1		Ndst4	0.0430727		GO: Biological Process	GO:0060425	lung morphogenesis		0.00968	1	0.2268	1	5	66	DLG5,TNC,VANGL2,CELSR1,RSPO2
Fbxo8	0.0748918		GO: Biological Process	GO:1901998	toxin transport		0.007185	1	0.2749	1	6	44	SLC7A8,RAB28,DNAJA1,HSPA5,DNM1,DNAJC17		Ndufaf3	0.0558158		GO: Biological Process	GO:0048565	digestive tract development		0.009865	1	0.2268	1	8	150	CDKN1A,PCSK5,HMGCS2,ALDH1A2,GLI3,CCKBR,VANGL2,DCHS1
Fdft1	0.0483671		GO: Biological Process	GO:0019080	viral gene expression		0.007208	1	0.2749	1	15	187	RPL32,RPL38,RPL39,RPL41,RPLP1,RPS2,RPS11,RPS15,RPS21,RPS25,GTF2F1,NUP62,TRIM11,POM121,RPL19		Nell2	0.0410524		GO: Biological Process	GO:0030857	negative regulation of epithelial cell differentiation		0.009997	1	0.2268	1	4	43	CCND1,EZH2,NOTCH4,FRZB
Fer1l5	0.0466999		GO: Biological Process	GO:0006112	energy reserve metabolic process		0.007358	1	0.2785	1	10	103	SORBS1,MT3,PTGES3,PER2,PHKA1,UBB,KL,UGP2,NR1D1,PPP1R3C		Nfya	0.00116173		GO: Cellular Component	GO:0002102	podosome		0.0001245	0.0498	0.03236	0.2126	5	26	TPM3,RHOU,SVIL,BIN2,LCP1
Fgf1	0.0387417		GO: Biological Process	GO:0044344	cellular response to fibroblast growth factor stimulus		0.007487	1	0.279	1	12	136	FGF1,HYAL2,FGFRL1,GTF2F1,FIBP,PDGFB,WNT4,HNRNPH1,UBB,KL,FLRT3,SPRED1		Nmbr	0.0413113		GO: Cellular Component	GO:0015629	actin cytoskeleton		0.0001618	0.06472	0.03236	0.2126	22	476	TPM3,SYNPO2,CDC42EP4,IQGAP2,ORC6,MTSS1,OBSCN,AIF1L,RHOU,AMOT,SVIL,BIN2,FHL2,WASF1,MLPH,LASP1,LCP1,VANGL2,PKNOX2,CORO1A,CGNL1,MTSS1L
Fgfrl1	0.0980877		GO: Biological Process	GO:0072655	establishment of protein localization to mitochondrion		0.007558	1	0.279	1	15	188	LRRK2,TOMM5,DYNLL1,HSPH1,TSPO,HK1,ZDHHC8,TOMM7,YWHAH,CTSK,UBE2J2,ATP5IF1,NDUFA13,TIMM13,TIMM8B		Nme5	0.0779933		GO: Cellular Component	GO:0044456	synapse part		0.00295	1	0.2522	1	25	708	ERBB3,RGS19,ZMYND8,CHRM3,CHRNA4,CHRNA7,CNIH3,KCNC4,PTPRN2,KCNH1,KCNN2,SLC17A7,SYP,NPY,NT5E,PRSS12,WNT7A,L1CAM,GABBR2,GRM2,CLSTN1,ZNRF1,ATP1A1,AKAP1,PDZD2
Fhl2	0.00067138		GO: Biological Process	GO:0002028	regulation of sodium ion transport		0.007719	1	0.279	1	9	88	NEDD4,P2RX4,COMMD1,STOML1,YWHAH,DLG1,NKAIN1,KIF5B,PCSK9		Notch4	2.91727e-05		GO: Cellular Component	GO:0001891	phagocytic cup		0.005539	1	0.2522	1	3	19	BIN2,LCP1,CORO1A
Fhod3	0.0024616		GO: Biological Process	GO:1902475	L-alpha-amino acid transmembrane transport		0.007765	1	0.279	1	5	32	SLC38A3,SLC7A8,PQLC2,SLC17A7,SLC25A15		Nov	0.0234722		GO: Cellular Component	GO:0097060	synaptic membrane		0.005585	1	0.2522	1	13	298	ERBB3,CHRM3,CHRNA4,CHRNA7,CNIH3,KCNH1,SYP,NT5E,L1CAM,GABBR2,GRM2,CLSTN1,AKAP1
Fibp	0.0779096		GO: Biological Process	GO:0038003	opioid receptor signaling pathway		0.007906	1	0.279	1	3	11	SIGMAR1,SYP,OPRM1		Npy	0.0043983		GO: Cellular Component	GO:0030315	T-tubule		0.006047	1	0.2522	1	5	60	KCNN2,CACNB2,EDNRA,IGF1R,ATP1A1
Fjx1	0.0569287		GO: Biological Process	GO:1901077	regulation of relaxation of muscle		0.007906	1	0.279	1	3	11	SRI,CAMK2G,CHGA		Nrp2	0.0351164		GO: Cellular Component	GO:0009986	cell surface		0.006379	1	0.2522	1	28	873	TPM3,IQGAP2,MAS1,NTSR2,NDP,CHRNA4,CHRNA7,BMP2,KCNH1,AMOT,SVIL,KCNN2,SDC4,NOTCH4,PCSK9,NT5E,WNT7A,L1CAM,CPM,CLSTN1,LDLR,S1PR1,HAVCR2,SCUBE1,CD38,RSPO2,IL6R,CD276
Fkbp14	0.0730762		GO: Biological Process	GO:0034975	protein folding in endoplasmic reticulum		0.007906	1	0.279	1	3	11	PDIA3,HSP90B1,HSPA5		Nt5c2	0.0260871		GO: Cellular Component	GO:0005912	adherens junction		0.006551	1	0.2522	1	18	484	CADM3,DLG5,SYNPO2,MTSS1,AIF1L,RHOU,JAG1,SVIL,PKP2,FHL2,WASF1,SDC4,APBB1IP,TNC,L1CAM,LASP1,LCP1,FZD2
Fkbp5	0.0337484		GO: Biological Process	GO:2000650	negative regulation of sodium ion transmembrane transporter activity		0.007906	1	0.279	1	3	11	NEDD4,STOML1,PCSK9		Nt5dc2	0.0424107		GO: Cellular Component	GO:0016323	basolateral plasma membrane		0.008225	1	0.2522	1	11	244	ERBB3,SLC29A2,CHRM3,HEPH,STXBP3,LDLR,VANGL2,SLC7A8,ATP1A1,IL6R,SLC4A11
Fkrp	0.0941937		GO: Biological Process	GO:0010921	regulation of phosphatase activity		0.007922	1	0.279	1	12	137	WDR81,TMEM132D,OAZ3,MYO1D,RIMBP2,HSP90B1,PLEK,PPP2R1B,PPP2R5C,JAK2,SPRED1,MPHOSPH10		Nt5e	1.18047e-05		GO: Cellular Component	GO:0008076	voltage-gated potassium channel complex		0.008931	1	0.2522	1	6	92	KCNA6,KCNC4,KCND1,KCNF1,KCNH1,KCNS2
Flrt3	0.051848		GO: Biological Process	GO:0044033	multi-organism metabolic process		0.007956	1	0.279	1	16	207	RPL32,RPL38,RPL39,RPL41,RPLP1,RPS2,RPS11,RPS15,RPS21,RPS25,GTF2F1,NUP62,MAP2K3,TRIM11,POM121,RPL19		Ntsr2	0.0765349		GO: Cellular Component	GO:0034705	potassium channel complex		0.009396	1	0.2522	1	6	93	KCNA6,KCNC4,KCND1,KCNF1,KCNH1,KCNS2
Flywch2	0.00690088		GO: Biological Process	GO:0030490	maturation of SSU-rRNA		0.008021	1	0.279	1	6	45	RPS21,NOB1,UTP6,ABT1,NOC4L,MPHOSPH10		Nudt12	0.044192		GO: Cellular Component	GO:0070161	anchoring junction		0.009539	1	0.2522	1	18	503	CADM3,DLG5,SYNPO2,MTSS1,AIF1L,RHOU,JAG1,SVIL,PKP2,FHL2,WASF1,SDC4,APBB1IP,TNC,L1CAM,LASP1,LCP1,FZD2
Fmo1	0.00067138		GO: Biological Process	GO:0003254	regulation of membrane depolarization		0.008021	1	0.279	1	6	45	LRRK2,OGA,TSPO,NTSR1,TRPM4,HCN4		Nxn	0.0336774		GO: Cellular Component	GO:0097517	contractile actin filament bundle		0.009585	1	0.2522	1	5	67	TPM3,AMOT,MLPH,LCP1,VANGL2
Fmo2	0.000885982		GO: Biological Process	GO:0005976	polysaccharide metabolic process		0.008238	1	0.2793	1	11	121	SORBS1,PTGES3,GLT8D1,PER2,ALG1,PDGFB,PHKA1,UBB,UGP2,NR1D1,PPP1R3C		Obscn	0.0812396		GO: Cellular Component	GO:0001725	stress fiber		0.009585	1	0.2522	1	5	67	TPM3,AMOT,MLPH,LCP1,VANGL2
Fmo5	0.0814652		GO: Biological Process	GO:0006825	copper ion transport		0.008346	1	0.2793	1	4	21	ATOX1,HEPH,CCS,COX17		Orc6	0.0141113		GO: Cellular Component	GO:0005884	actin filament		0.009878	1	0.2522	1	6	94	TPM3,IQGAP2,AIF1L,AMOT,LCP1,CORO1A
Fn3k	0.0525002		GO: Biological Process	GO:0042987	amyloid precursor protein catabolic process		0.008346	1	0.2793	1	4	21	OLFM1,LRRTM3,DHCR24,APH1A		Pafah1b3	0.0844835		Mouse Phenotype	MP:0002065	abnormal fear/anxiety-related behavior		6.074e-08	0.0002536	0.0001048	0.0009338	30	386	MAS1,GJB6,MC2R,SSTR2,SLITRK1,CHRNA4,ADCY8,CHRNA7,B4GALT5,TUBA1A,SRGAP3,SLC17A7,WASF1,FKBP5,NPY,HTR1A,TNC,PRSS12,FOSB,DUSP1,PAK5,L1CAM,GABBR2,GRM2,LDLR,CREM,CRHBP,CRHR1,CCKBR,ATP1A1
Folh1	0.0466999		GO: Biological Process	GO:0032095	regulation of response to food		0.008346	1	0.2793	1	4	21	MKKS,MT3,NPY,OPRM1		Pak7	0.0192294		Mouse Phenotype	MP:0001362	abnormal anxiety-related response		7.439e-08	0.0003106	0.0001048	0.0009338	28	346	MAS1,GJB6,MC2R,SSTR2,SLITRK1,CHRNA4,ADCY8,CHRNA7,B4GALT5,TUBA1A,SLC17A7,WASF1,FKBP5,NPY,HTR1A,TNC,PRSS12,FOSB,DUSP1,L1CAM,GABBR2,GRM2,LDLR,CREM,CRHBP,CRHR1,CCKBR,ATP1A1
Fstl4	0.0773852		GO: Biological Process	GO:0034470	ncRNA processing		0.008544	1	0.2793	1	26	399	RPL32,RPL38,RPL39,RPL41,RPLP1,RPS2,RPS11,RPS15,RPS21,RPS25,NOP10,NOB1,RPP38,DDX27,UTP6,ADAT3,RIOK3,RPP14,INTS5,ABT1,BMT2,NOC4L,EIF4A3,TPRKB,MPHOSPH10,RPL19		Pamr1	0.0234358		Mouse Phenotype	MP:0001363	increased anxiety-related response		7.527e-08	0.0003143	0.0001048	0.0009338	21	206	MAS1,GJB6,MC2R,SSTR2,SLITRK1,CHRNA4,B4GALT5,SLC17A7,FKBP5,NPY,HTR1A,TNC,PRSS12,FOSB,L1CAM,GABBR2,CREM,CRHBP,CRHR1,CCKBR,ATP1A1
Fundc1	0.0653975		GO: Biological Process	GO:0046398	UDP-glucuronate metabolic process		0.008804	1	0.2793	1	2	4	UGDH,UGP2		Paqr8	0.0310492		Mouse Phenotype	MP:0002572	abnormal emotion/affect behavior		1.726e-07	0.0007206	0.0001802	0.001606	40	645	MAS1,GJB6,MC2R,DACT2,SSTR2,ZDHHC8,PTGS2,SLITRK1,CHRNA4,ADCY8,CHRNA7,B4GALT5,TUBA1A,KCNH1,SRGAP3,RALBP1,SLC17A7,WASF1,FKBP5,NPY,HTR1A,NT5E,TNC,PRSS12,FOSB,DUSP1,PAK5,L1CAM,GABBR2,GRM2,NXN,LDLR,CREM,CRHBP,CRHR1,CCKBR,EGR1,FRZB,ATP1A1,IL6R
Fus	0.0898927		GO: Biological Process	GO:0097343	ripoptosome assembly		0.008804	1	0.2793	1	2	4	RIPK1,CYLD		Parm1	0.00660763		Mouse Phenotype	MP:0000439	enlarged cranium		3.858e-05	0.1611	0.03221	0.2872	5	16	GLDC,GLI3,NOV,L1CAM,CXXC5
Fut11	0.0639647		GO: Biological Process	GO:1901026	ripoptosome assembly involved in necroptotic process		0.008804	1	0.2793	1	2	4	RIPK1,CYLD		Pars2	0.062206		Mouse Phenotype	MP:0008985	hemimelia		6.725e-05	0.2808	0.0399	0.3556	3	4	ZBTB16,GLI3,WNT7A
Fxr1	0.090507		GO: Biological Process	GO:0031508	pericentric heterochromatin assembly		0.008804	1	0.2793	1	2	4	H3F3A,H3F3B		Pax6	0.0639848		Mouse Phenotype	MP:0005197	abnormal uvea morphology		6.875e-05	0.287	0.0399	0.3556	15	181	HTRA1,SPNS2,CHRM3,HEPH,PXDN,GLI3,JAG1,MLPH,SDC4,COL4A1,CYP4V2,NXN,LDLR,PAX6,CX3CR1
Fxyd7	0.0267743		GO: Biological Process	GO:0032097	positive regulation of response to food		0.008804	1	0.2793	1	2	4	NPY,OPRM1		Pcdhga4	0.0916318		Mouse Phenotype	MP:0001317	abnormal pupil morphology		7.645e-05	0.3192	0.0399	0.3556	8	55	SPNS2,CHRM3,GLI3,JAG1,SDC4,COL4A1,NXN,PAX6
Gabbr2	0.0589863		GO: Biological Process	GO:1903059	regulation of protein lipidation		0.008804	1	0.2793	1	2	4	HHATL,SVIP		Pcdhgb8	0.0690697		Mouse Phenotype	MP:0004000	impaired passive avoidance behavior		0.0001742	0.7274	0.07686	0.6852	6	33	ADCY8,CHRNA7,SRGAP3,TNC,PAK5,GABBR2
Galnt1	0.0940854		GO: Biological Process	GO:1903753	negative regulation of p38MAPK cascade		0.008804	1	0.2793	1	2	4	HSPH1,DLG1		Pcdhgc4	0.0073884		Mouse Phenotype	MP:0004159	double aortic arch		0.0001841	0.7686	0.07686	0.6852	4	12	PCSK5,ALDH1A2,EDNRA,VANGL2
Gatad2b	0.0879586		GO: Biological Process	GO:0032100	positive regulation of appetite		0.008804	1	0.2793	1	2	4	NPY,OPRM1		Pcdhgc5	0.0763714		Mouse Phenotype	MP:0012312	impaired avoidance learning behavior		0.0003354	1	0.1243	1	6	37	ADCY8,CHRNA7,SRGAP3,TNC,PAK5,GABBR2
Gdpd5	0.0827502		GO: Biological Process	GO:0042982	amyloid precursor protein metabolic process		0.008861	1	0.2793	1	5	33	OLFM1,LRRTM3,DHCR24,DLG1,APH1A		Pcsk5	0.0251218		Mouse Phenotype	MP:0005430	absent fibula		0.0003574	1	0.1243	1	4	14	PCSK5,ZBTB16,GLI3,RSPO2
Gfer	0.0542548		GO: Biological Process	GO:0051954	positive regulation of amine transport		0.008925	1	0.2793	1	6	46	STX1A,SLC38A3,NPY2R,NTSR1,PCP4,CHRNA4		Pcsk9	0.0350365		Mouse Phenotype	MP:0009355	increased liver triglyceride level		0.0004706	1	0.1511	1	10	108	CEBPA,NADK2,CHKA,ADIPOR2,NPY,PNPLA2,GPR12,LDLR,EGR1,SLC25A13
Gfra4	0.0402267		GO: Biological Process	GO:0046364	monosaccharide biosynthetic process		0.008952	1	0.2793	1	10	106	PER2,DGAT2,GOT2,PGAM1,PGK1,NR1D1,CRY1,SLC25A10,SESN2,ENO1		Pdzd2	0.00573326		Mouse Phenotype	MP:0003052	omphalocele		0.0005618	1	0.1675	1	7	56	CDKN1A,PCSK5,CHRNA7,GLDC,GLI3,VANGL2,CELSR1
Ggps1	0.033848		GO: Biological Process	GO:0045185	maintenance of protein location		0.008952	1	0.2793	1	10	106	DZIP1,SRI,GOLPH3,TAF8,TSPO,PDIA3,HK1,HSPA5,TWF1,ANKRD13C		Pdzrn4	0.0950513		Mouse Phenotype	MP:0001364	decreased anxiety-related response		0.0008514	1	0.237	1	12	159	ADCY8,CHRNA7,TUBA1A,WASF1,TNC,FOSB,DUSP1,L1CAM,LDLR,CREM,CRHR1,CCKBR
Gjb6	0.00261608		GO: Biological Process	GO:0009306	protein secretion		0.009007	1	0.2793	1	33	542	EPHB6,UQCC2,ARL4D,PDE8B,AACS,OGA,HYAL2,CD276,RNF19B,SRI,GOLPH3,SERP1,ARFIP1,STX1A,PER2,ABCC8,IL33,CAMK2G,OPRM1,CD38,STXBP4,CADM1,HPS1,PLEK,GNPTAB,NR1D1,PPID,PDIA4,CBLN4,TRPM4,AHI1,JAK2,KIF5B		Per2	0.0289398		Mouse Phenotype	MP:0003139	patent ductus arteriosus		0.001007	1	0.2506	1	4	18	PCSK5,PTGS2,JAG1,EDNRA
Glt8d1	0.0717683		GO: Biological Process	GO:0006470	protein dephosphorylation		0.009672	1	0.2982	1	23	344	WDR81,TMEM132D,OAZ3,RNGTT,MYO1D,CAMK2G,PTP4A3,RIMBP2,PPTC7,HSP90B1,PIN1,PLEK,DUSP19,PPP1R3C,PPP2R1B,PPP2R5C,JAK2,PTPRS,DLG1,DUSP7,PTP4A2,SPRED1,MPHOSPH10		Pigz	0.0690697		Mouse Phenotype	MP:0004491	abnormal orientation of outer hair cell stereociliary bundles		0.001093	1	0.2506	1	5	31	USP53,VANGL2,CELSR1,DCHS1,FZD2
Gltpd1	0.0209728		GO: Biological Process	GO:2001267	regulation of cysteine-type endopeptidase activity involved in apoptotic signaling pathway		0.009889	1	0.2995	1	4	22	TRADD,RIPK1,JAK2,PIH1D1		Pik3c2a	0.0380823		Mouse Phenotype	MP:0005607	decreased bleeding time		0.00125	1	0.2506	1	4	19	SGK3,MLPH,NT5E,LDLR
Gm13446	0.0509529		GO: Biological Process	GO:0048266	behavioral response to pain		0.009889	1	0.2995	1	4	22	KCNIP3,SCN9A,TSPO,CRHR1		Pknox2	0.00323972		Mouse Phenotype	MP:0001314	corneal opacity		0.00133	1	0.2506	1	8	83	INHBB,SPNS2,PXDN,JAG1,COL4A1,LHFPL2,PAX6,SLC4A11
Gm13826	0.000118915		GO: Biological Process	GO:0046835	carbohydrate phosphorylation		0.009889	1	0.2995	1	4	22	HKDC1,HK1,GNPTAB,XYLB		Pkp2	4.34208e-08		Mouse Phenotype	MP:0003460	decreased fear-related response		0.001396	1	0.2506	1	6	48	ADCY8,CHRNA7,SRGAP3,TNC,PAK5,GABBR2
Gm16532	0.0814652		GO: Cellular Component	GO:0098798	mitochondrial protein complex		2.082e-11	1.335e-08	1.335e-08	9.397e-08	27	149	TOMM5,CHCHD6,ATP5F1E,ATP5ME,ATP5PF,SPG7,NDUFA1,NDUFA2,NDUFA3,NDUFA5,NDUFA6,NDUFB7,NDUFS6,ATP5MD,HADHB,C19orf70,PDK1,UQCR10,TOMM7,COX6A1,COX8A,ATP5MPL,DBT,ATP5IF1,NDUFA13,TIMM13,TIMM8B		Plce1	4.17762e-06		Mouse Phenotype	MP:0003385	abnormal body wall morphology		0.001657	1	0.2506	1	10	127	CDKN1A,PCSK5,CHRNA7,BMP2,ALDH1A2,GLDC,GLI3,NOV,VANGL2,CELSR1
Gm1673	0.00783551		GO: Cellular Component	GO:0005743	mitochondrial inner membrane		4.539e-09	2.909e-06	1.391e-06	9.796e-06	49	507	LRRK2,L2HGDH,ABCA9,MRPS28,MRPS18B,UQCC2,CHCHD6,ATP5F1E,ATP5ME,ATP5PF,SPG7,NDUFA1,NDUFA2,NDUFA3,NDUFA5,NDUFA6,NDUFB7,NDUFS6,TMEM11,UQCR11,GOT2,RHBDL1,ATP5MD,CYB5B,TMEM256,HADHB,C19orf70,UQCR10,CKMT1B,MRPS21,MRPL50,COX6A1,NDUFAF3,COX6B1,COX6C,COX8A,ATP5MPL,SLC25A10,ROMO1,AURKAIP1,ATP5IF1,HIGD2A,MRPL52,MRPL2,NDUFA13,TIMM13,TIMM8B,ATAD3A,SLC25A15		Plcl2	0.0610656		Mouse Phenotype	MP:0003675	kidney cysts		0.001766	1	0.2506	1	12	173	CDKN1A,DLG5,DZIP1L,MTSS1,FJX1,PTGS2,FREM2,SALL2,GLDC,COL4A1,VANGL2,DCHS1
Gm1821	0.0751429		GO: Cellular Component	GO:0019866	organelle inner membrane		7.584e-09	4.861e-06	1.391e-06	9.796e-06	52	564	SIGMAR1,LRRK2,L2HGDH,ABCA9,MRPS28,MRPS18B,UQCC2,CHCHD6,ATP5F1E,ATP5ME,ATP5PF,SPG7,NDUFA1,NDUFA2,NDUFA3,NDUFA5,NDUFA6,NDUFB7,NDUFS6,TMEM11,UQCR11,GOT2,RHBDL1,ATP5MD,CYB5B,TMEM256,P2RX4,HADHB,C19orf70,UQCR10,CKMT1B,MRPS21,MRPL50,COX6A1,NDUFAF3,COX6B1,COX6C,COX8A,ATP5MPL,SLC25A10,ROMO1,KCNH1,AURKAIP1,ATP5IF1,HIGD2A,MRPL52,MRPL2,NDUFA13,TIMM13,TIMM8B,ATAD3A,SLC25A15		Pld1	0.000468956		Mouse Phenotype	MP:0000022	abnormal ear shape		0.001797	1	0.2506	1	3	10	FREM2,TCOF1,EDNRA
Gm20300	0.0982952		GO: Cellular Component	GO:0005740	mitochondrial envelope		8.705e-09	5.58e-06	1.391e-06	9.796e-06	62	736	LRRK2,L2HGDH,FUNDC1,TOMM5,ABCA9,SNN,MIEF2,MRPS28,MRPS18B,UQCC2,CHCHD6,MT3,ATP5F1E,ATP5ME,ATP5PF,SPG7,GOLPH3,NDUFA1,NDUFA2,NDUFA3,NDUFA5,NDUFA6,NDUFB7,GFER,NDUFS6,TMEM11,TSPO,UQCR11,WASF1,GOT2,RHBDL1,ATP5MD,PDIA3,CYB5B,TMEM256,HADHB,HK1,C19orf70,UQCR10,CKMT1B,MRPS21,MRPL50,TOMM7,COX6A1,NDUFAF3,COX6B1,COX6C,COX8A,ATP5MPL,SLC25A10,ROMO1,AURKAIP1,ATP5IF1,HIGD2A,COX17,MRPL52,MRPL2,NDUFA13,TIMM13,TIMM8…		Plekhg1	3.03015e-16		Mouse Phenotype	MP:0005450	abnormal energy expenditure		0.00181	1	0.2506	1	15	246	IL18,CEBPA,NADK2,PTGS2,ADIPOR2,LRRC8C,PNPLA2,GPR12,FMO5,DUSP1,PPARA,LDLR,CCKBR,MFSD2A,RCAN2
Gm5506	0.000118915		GO: Cellular Component	GO:0098800	inner mitochondrial membrane protein complex		1.085e-08	6.956e-06	1.391e-06	9.796e-06	20	112	CHCHD6,ATP5F1E,ATP5ME,ATP5PF,SPG7,NDUFA1,NDUFA2,NDUFA3,NDUFA5,NDUFA6,NDUFB7,NDUFS6,ATP5MD,C19orf70,UQCR10,COX6A1,COX8A,ATP5MPL,ATP5IF1,NDUFA13		Plekho2	0.000789959		Mouse Phenotype	MP:0014172	decreased fatty acid oxidation		0.001853	1	0.2506	1	4	21	NADK2,PNPLA2,FMO5,PPARA
Gm6588	0.0573288		GO: Cellular Component	GO:0044455	mitochondrial membrane part		2.187e-08	1.402e-05	2.336e-06	1.645e-05	26	189	LRRK2,L2HGDH,FUNDC1,TOMM5,CHCHD6,ATP5F1E,ATP5ME,ATP5PF,SPG7,NDUFA1,NDUFA2,NDUFA3,NDUFA5,NDUFA6,NDUFB7,NDUFS6,TMEM11,ATP5MD,C19orf70,UQCR10,TOMM7,COX6A1,COX8A,ATP5MPL,ATP5IF1,NDUFA13		Plin4	4.21004e-54		Mouse Phenotype	MP:0005334	abnormal fat pad morphology		0.001879	1	0.2506	1	17	298	CDKN1A,IL18,CEBPA,CHRM3,PTGS2,DHCR24,ADIPOR2,NPY,PNPLA2,GPR12,FMO5,DUSP1,PPARA,LDLR,IGF1R,TRIB1,RCAN2
Gm6682	0.040744		GO: Cellular Component	GO:0044456	synapse part		2.985e-08	1.914e-05	2.734e-06	1.925e-05	59	708	LIN7C,SIGMAR1,ASIC1,LRRK2,STX1B,OLFM1,MME,PRSS12,CLSTN1,SLC8A2,MT3,FUS,SNCB,UNC13A,ATP6V1G2,SRI,MPDZ,SEPT6,LIN7B,STX1A,ABCC8,TSPO,SYN1,SYP,SYT4,GNG3,NPY,CAMK2G,NTSR1,GRM2,OPRM1,P2RX4,SLC5A7,RUSC1,CHRM4,CHRNA4,CADM1,FLRT3,HOMER1,SLC2A8,CPE,GABBR2,NR1D1,ANKS1B,LRRTM3,SLC30A3,ITPKA,KCNH1,KCNN2,SLC17A7,DLG1,TMEM163,DNM1,HCN4,ZNRF2,FXR1,UNC13C,ENO1,SEZ6		Pnpla2	1.00949e-07		Mouse Phenotype	MP:0002621	delayed neural tube closure		0.001919	1	0.2506	1	5	35	CHRNA7,GLI3,TCOF1,VANGL2,CELSR1
Gmfb	0.0814652		GO: Cellular Component	GO:0031966	mitochondrial membrane		3.554e-08	2.278e-05	2.847e-06	2.005e-05	58	694	LRRK2,L2HGDH,FUNDC1,TOMM5,ABCA9,SNN,MIEF2,MRPS28,MRPS18B,UQCC2,CHCHD6,MT3,ATP5F1E,ATP5ME,ATP5PF,SPG7,NDUFA1,NDUFA2,NDUFA3,NDUFA5,NDUFA6,NDUFB7,NDUFS6,TMEM11,TSPO,UQCR11,WASF1,GOT2,RHBDL1,ATP5MD,CYB5B,TMEM256,HADHB,HK1,C19orf70,UQCR10,CKMT1B,MRPS21,MRPL50,TOMM7,COX6A1,NDUFAF3,COX6B1,COX6C,COX8A,ATP5MPL,SLC25A10,ROMO1,AURKAIP1,ATP5IF1,HIGD2A,MRPL52,MRPL2,NDUFA13,TIMM13,TIMM8B,ATAD3A,SLC25A15		Polr2a	0.0376396		Mouse Phenotype	MP:0012315	impaired learning		0.00194	1	0.2506	1	8	88	KIF21B,ADCY8,CHRNA7,SRGAP3,TNC,FOSB,PAK5,GABBR2
Gng12	0.0757075		GO: Cellular Component	GO:0045202	synapse		3.382e-07	0.0002168	2.408e-05	0.0001696	65	870	LIN7C,SIGMAR1,ASIC1,LRRK2,STX1B,OLFM1,MME,PRSS12,CLSTN1,SLC8A2,MT3,FUS,SNCB,UNC13A,ATP6V1G2,SRI,MPDZ,SEPT6,LIN7B,STX1A,ABCC8,TSPO,SYN1,SYP,SYT4,GNG3,WASF1,NPY,CAMK2G,NTSR1,GRM2,OPRM1,P2RX4,RIMBP2,SLC5A7,RUSC1,CHRM4,CHRNA4,CADM1,FLRT3,HOMER1,SLC2A8,CPE,GABBR2,NR1D1,CBLN4,ANKS1B,LRRTM3,NPHP4,SLC30A3,ITPKA,OLFM3,KCNH1,KCNN2,SLC17A7,DLG1,TMEM163,DNM1,HCN4,PRRT2,ZNRF2,FXR1,UNC13C,ENO1,SEZ6		Pou3f1	0.0916318		Mouse Phenotype	MP:0003106	abnormal fear-related response		0.001967	1	0.2506	1	7	69	SLITRK1,ADCY8,CHRNA7,SRGAP3,TNC,PAK5,GABBR2
Gng3	0.0989755		GO: Cellular Component	GO:0036477	somatodendritic compartment		1.329e-06	0.0008518	8.518e-05	0.0005998	63	867	ASIC1,LRRK2,KCNIP3,FABP7,TUBB3,TUBB4A,OLFM1,MME,KLHL1,PRSS12,SLC8A2,MT3,FUS,SNCB,PTGES3,MYO1D,SRI,MPDZ,SST,NELL2,SYN1,TACR3,GNAQ,GNG3,NPY,GOT2,NTSR1,GRM2,OPRM1,CCNG1,THY1,P2RX4,PDGFB,SLC5A7,CHRM4,CHRNA4,SLC38A2,UBB,CADM1,HOMER1,CPE,NR1D1,CRHR1,CRMP1,IGHMBP2,DIXDC1,TRPM4,IMPA1,EIF4A3,RTN4R,ANKS1B,ITPKA,GDPD5,KCND1,KCNH1,KCNN2,RBM8A,RAC3,HCN4,PLXDC1,FXR1,SEZ6,EPHB1		Ppara	1.36259e-06		Mouse Phenotype	MP:0006048	pulmonary valve regurgitation		0.001968	1	0.2506	1	2	3	JAG1,PLCE1
Gnptab	0.0884049		GO: Cellular Component	GO:0044429	mitochondrial part		1.627e-06	0.001043	9.48e-05	0.0006675	69	987	LRRK2,L2HGDH,FUNDC1,TOMM5,ABCA9,SNN,AK4,MIEF2,MRPS28,MRPS18B,UQCC2,CHCHD6,MT3,ATP5F1E,ATP5ME,ATP5PF,SPG7,GOLPH3,NDUFA1,NDUFA2,NDUFA3,NDUFA5,NDUFA6,NDUFB7,GFER,NDUFS6,TMEM11,TSPO,UQCR11,GPT2,WASF1,GOT2,RHBDL1,ATP5MD,PDIA3,CYB5B,TMEM256,HAGH,HADHB,HK1,C19orf70,PDK1,UQCR10,CKMT1B,MRPS21,MRPL50,TOMM7,COX6A1,NDUFAF3,COX6B1,COX6C,COX8A,ETNPPL,ATP5MPL,SLC25A10,ROMO1,DBT,AURKAIP1,ATP5IF1,HIGD2A,COX17,MRP…		Ppid	0.0351102		Mouse Phenotype	MP:0009475	abnormal nicotine-mediated receptor currents		0.001968	1	0.2506	1	2	3	CHRNA4,CHRNA7
Golga7	0.0157259		GO: Cellular Component	GO:0098793	presynapse		4.157e-06	0.002665	0.0002221	0.001564	32	341	LIN7C,LRRK2,STX1B,MME,PRSS12,MT3,SNCB,UNC13A,ATP6V1G2,SEPT6,LIN7B,STX1A,ABCC8,SYN1,SYP,SYT4,NPY,NTSR1,GRM2,P2RX4,SLC5A7,CADM1,SLC2A8,SLC30A3,KCNH1,SLC17A7,DLG1,TMEM163,DNM1,HCN4,ZNRF2,UNC13C		Ppp1r3g	0.00660763		Mouse Phenotype	MP:0030353	wide sagittal suture		0.001968	1	0.2506	1	2	3	GLI3,EDNRA
Golph3	0.0834436		GO: Cellular Component	GO:0030424	axon		4.958e-06	0.003178	0.0002445	0.001721	45	567	LRRK2,WDR81,KCNIP3,TUBB3,TUBB4A,OLFM1,MME,PRSS12,MT3,SNCB,RAB21,UNC13A,SPG7,MYO1D,SRI,SEPT6,NTNG2,SYN1,SYP,DAGLA,NPY,NTSR1,GRM2,P2RX4,PCP4,SLC5A7,CHRM4,SLC38A2,CADM1,FLRT3,HOMER1,IGHMBP2,DIXDC1,IMPA1,RTN4R,GDPD5,STMN4,KCNH1,SLC17A7,DLG1,KIF5B,DNM1,HCN4,FXR1,EPHB1		Ppp2r1b	0.0955738		Mouse Phenotype	MP:0002187	abnormal fibula morphology		0.002138	1	0.2506	1	7	70	PCSK5,ZBTB16,BMP2,GLI3,WNT7A,CXXC5,RSPO2
Got2	0.0346029		GO: Cellular Component	GO:0033267	axon part		1.161e-05	0.007444	0.0005317	0.003744	29	309	LRRK2,WDR81,KCNIP3,TUBB4A,OLFM1,PRSS12,SNCB,RAB21,UNC13A,SPG7,MYO1D,SRI,SEPT6,SYN1,SYP,DAGLA,NPY,NTSR1,P2RX4,CHRM4,CADM1,FLRT3,DIXDC1,RTN4R,KCNH1,DLG1,KIF5B,DNM1,HCN4		Ppp4r1	0.0829107		Mouse Phenotype	MP:0002665	decreased circulating corticosterone level		0.002182	1	0.2506	1	5	36	MC2R,FKBP5,TSC22D3,LDLR,CRHR1
Gpr101	0.0535757		GO: Cellular Component	GO:0005790	smooth endoplasmic reticulum		1.434e-05	0.009193	0.0006129	0.004315	9	39	MYO1D,SRI,PDIA3,HSP90B1,HSPA5,PDIA4,DNAJC3,KCNN2,SVIP		Pptc7	0.0840496		Mouse Phenotype	MP:0002546	mydriasis		0.002219	1	0.2506	1	4	22	CHRM3,SDC4,NXN,PAX6
Gpr155	0.0474883		GO: Cellular Component	GO:0043025	neuronal cell body		1.871e-05	0.012	0.0007127	0.005018	46	616	LRRK2,FABP7,TUBB3,TUBB4A,OLFM1,KLHL1,SLC8A2,FUS,SNCB,PTGES3,MYO1D,SST,NELL2,TACR3,NPY,GOT2,NTSR1,OPRM1,CCNG1,P2RX4,PDGFB,SLC5A7,CHRM4,CHRNA4,SLC38A2,UBB,HOMER1,CPE,NR1D1,CRHR1,CRMP1,IGHMBP2,DIXDC1,TRPM4,IMPA1,EIF4A3,RTN4R,GDPD5,KCND1,KCNH1,KCNN2,RBM8A,RAC3,HCN4,PLXDC1,SEZ6		Prkd1	0.0151653		Mouse Phenotype	MP:0002799	abnormal passive avoidance behavior		0.002346	1	0.2506	1	6	53	ADCY8,CHRNA7,SRGAP3,TNC,PAK5,GABBR2
Gpr165	0.0101995		GO: Cellular Component	GO:0044297	cell body		1.89e-05	0.01212	0.0007127	0.005018	50	691	ACTA1,LRRK2,FABP7,TUBB3,TUBB4A,OLFM1,KLHL1,SLC8A2,FUS,SNCB,CACYBP,PTGES3,MYO1D,SST,NELL2,TACR3,GNAQ,GNG3,NPY,GOT2,NTSR1,OPRM1,CCNG1,P2RX4,PDGFB,SLC5A7,CHRM4,CHRNA4,SLC38A2,UBB,HOMER1,CPE,NR1D1,CRHR1,CRMP1,IGHMBP2,DIXDC1,TRPM4,IMPA1,EIF4A3,RTN4R,GDPD5,KCND1,KCNH1,KCNN2,RBM8A,RAC3,HCN4,PLXDC1,SEZ6		Prr5	0.00104197		Mouse Phenotype	MP:0005448	abnormal energy homeostasis		0.002378	1	0.2506	1	15	253	IL18,CEBPA,NADK2,PTGS2,ADIPOR2,LRRC8C,PNPLA2,GPR12,FMO5,DUSP1,PPARA,LDLR,CCKBR,MFSD2A,RCAN2
Gpr45	0.0992954		GO: Cellular Component	GO:0030425	dendrite		2.929e-05	0.01878	0.001043	0.007345	44	590	ASIC1,LRRK2,KCNIP3,TUBB3,MME,KLHL1,PRSS12,SLC8A2,MT3,FUS,MYO1D,SRI,MPDZ,NELL2,SYN1,GNAQ,GNG3,NTSR1,GRM2,OPRM1,CCNG1,THY1,P2RX4,PDGFB,SLC5A7,CHRNA4,SLC38A2,CADM1,HOMER1,CPE,NR1D1,CRHR1,CRMP1,EIF4A3,ANKS1B,ITPKA,KCND1,KCNH1,KCNN2,RBM8A,PLXDC1,FXR1,SEZ6,EPHB1		Prss12	0.0412219		Mouse Phenotype	MP:0003104	acrania		0.002424	1	0.2506	1	3	11	FREM2,TCOF1,SCUBE1
Gpr61	0.0898927		GO: Cellular Component	GO:0008021	synaptic vesicle		3.717e-05	0.02383	0.001254	0.008829	18	156	LRRK2,STX1B,MME,MT3,ATP6V1G2,SEPT6,STX1A,ABCC8,SYN1,SYP,SYT4,SLC5A7,CADM1,SLC2A8,SLC30A3,SLC17A7,TMEM163,DNM1		Ptgs2	0.0199779		Mouse Phenotype	MP:0003755	abnormal palate morphology		0.002437	1	0.2506	1	18	332	CDKN1A,PCSK5,INHBB,DZIP1L,BMP2,GLDC,GLI3,JAG1,ADAMTS20,TCOF1,LASP1,NXN,EDNRA,VANGL2,RSPO2,PAX6,FZD2,GAB1
Gpt2	0.00826242		GO: Cellular Component	GO:0070469	respiratory chain		4.331e-05	0.02776	0.001388	0.009773	13	90	NDUFA1,NDUFA2,NDUFA3,NDUFA5,NDUFA6,NDUFB7,NDUFS6,UQCR11,UQCR10,COX6A1,COX8A,HIGD2A,NDUFA13		Ptpn7	0.0432468		Mouse Phenotype	MP:0003368	decreased circulating glucocorticoid level		0.002471	1	0.2506	1	5	37	MC2R,FKBP5,TSC22D3,LDLR,CRHR1
Gramd3	0.0581472		GO: Cellular Component	GO:0098803	respiratory chain complex		5.014e-05	0.03214	0.00153	0.01077	11	67	NDUFA1,NDUFA2,NDUFA3,NDUFA5,NDUFA6,NDUFB7,NDUFS6,UQCR10,COX6A1,COX8A,NDUFA13		Ptprn2	0.0916318		Mouse Phenotype	MP:0006058	decreased cerebral infarction size		0.002471	1	0.2506	1	5	37	IL18,PTGS2,PLD1,LDLR,EGR1
Grm2	0.00598521		GO: Cellular Component	GO:0016469	proton-transporting two-sector ATPase complex		8.301e-05	0.05321	0.002419	0.01703	9	48	ATP5F1E,ATP5ME,ATP5PF,ATP6V1G2,ATP5MD,ATP6V1F,ATP5MPL,ATP6V0E2,ATP5IF1		Ptprr	0.0337832		Mouse Phenotype	MP:0003257	abnormal abdominal wall morphology		0.002572	1	0.2506	1	8	92	CDKN1A,PCSK5,CHRNA7,BMP2,GLDC,GLI3,VANGL2,CELSR1
Grwd1	0.00247271		GO: Cellular Component	GO:0005753	mitochondrial proton-transporting ATP synthase complex		0.0001112	0.07128	0.003099	0.02182	6	21	ATP5F1E,ATP5ME,ATP5PF,ATP5MD,ATP5MPL,ATP5IF1		Pxdn	0.000420277		Mouse Phenotype	MP:0002730	head shaking		0.002632	1	0.2506	1	4	23	JAG1,VANGL2,CELSR1,SLC25A13
Gsdma	0.0557009		GO: Cellular Component	GO:0070382	exocytic vesicle		0.0001333	0.08547	0.003561	0.02507	18	172	LRRK2,STX1B,MME,MT3,ATP6V1G2,SEPT6,STX1A,ABCC8,SYN1,SYP,SYT4,SLC5A7,CADM1,SLC2A8,SLC30A3,SLC17A7,TMEM163,DNM1		Rab33a	0.0901882		Mouse Phenotype	MP:0002792	abnormal retinal vasculature morphology		0.002641	1	0.2506	1	11	158	IL18,NDP,PTGS2,PER2,UCHL3,JAG1,MERTK,NOTCH4,COL4A1,S1PR1,LFNG
Gtf2f1	0.032762		GO: Cellular Component	GO:0005746	mitochondrial respiratory chain		0.0001442	0.09241	0.003697	0.02603	11	75	NDUFA1,NDUFA2,NDUFA3,NDUFA5,NDUFA6,NDUFB7,NDUFS6,UQCR10,COX6A1,COX8A,NDUFA13		Ralbp1	0.096429		Mouse Phenotype	MP:0005194	abnormal anterior uvea morphology		0.002753	1	0.2554	1	10	136	SPNS2,CHRM3,HEPH,PXDN,GLI3,JAG1,SDC4,COL4A1,NXN,PAX6
Gucy2c	0.0570924		GO: Cellular Component	GO:0045259	proton-transporting ATP synthase complex		0.0001936	0.1241	0.004772	0.0336	6	23	ATP5F1E,ATP5ME,ATP5PF,ATP5MD,ATP5MPL,ATP5IF1		Rasa3	0.00323972		Mouse Phenotype	MP:0010378	increased respiratory quotient		0.002838	1	0.2576	1	6	55	NADK2,FKBP5,PNPLA2,FMO5,DUSP1,MFSD2A
H3f3a	0.0836757		GO: Cellular Component	GO:0045271	respiratory chain complex I		0.0002177	0.1396	0.004813	0.03389	8	43	NDUFA1,NDUFA2,NDUFA3,NDUFA5,NDUFA6,NDUFB7,NDUFS6,NDUFA13		Rasa4	0.0337832		Mouse Phenotype	MP:0002102	abnormal ear morphology		0.003096	1	0.2706	1	23	479	CDKN1A,CDO1,GJB6,NDP,BMP2,FREM2,ALDH1A2,GLI3,JAG1,USP53,TCOF1,NXN,LFNG,EDNRA,VANGL2,CELSR1,IGF1R,SLC25A13,DCHS1,RSPO2,PAX6,FZD2,SLC4A11
H3f3b	0.0814652		GO: Cellular Component	GO:0005747	mitochondrial respiratory chain complex I		0.0002177	0.1396	0.004813	0.03389	8	43	NDUFA1,NDUFA2,NDUFA3,NDUFA5,NDUFA6,NDUFB7,NDUFS6,NDUFA13		Rasd1	0.000327816		Mouse Phenotype	MP:0005098	abnormal optic choroid morphology		0.003111	1	0.2706	1	6	56	HTRA1,HEPH,MLPH,CYP4V2,LDLR,CX3CR1
Hadhb	0.0497804		GO: Cellular Component	GO:0030964	NADH dehydrogenase complex		0.0002177	0.1396	0.004813	0.03389	8	43	NDUFA1,NDUFA2,NDUFA3,NDUFA5,NDUFA6,NDUFB7,NDUFS6,NDUFA13		Rasgef1c	0.0281382		Mouse Phenotype	MP:0009384	cardiac valve regurgitation		0.003611	1	0.2825	1	4	25	ERBB3,FGFRL1,JAG1,PLCE1
Hagh	0.0779334		GO: Cellular Component	GO:0005840	ribosome		0.0003544	0.2272	0.007573	0.05332	21	235	RPL32,RPL36AL,RPL38,RPL39,RPL41,RPLP1,RPS2,RPS11,RPS15,RPS21,RPS25,MRPS28,MRPS18B,MT3,SERP1,MRPS21,MRPL50,RPS6KL1,MRPL52,MRPL2,RPL19		Rasl11b	0.0234358		Mouse Phenotype	MP:0002063	abnormal learning/memory/conditioning		0.00364	1	0.2825	1	30	693	KIF21B,CDC42EP4,DACT2,SSTR2,ZDHHC8,CHRM3,CHRNA4,ADCY8,CHRNA7,PER2,TUBA1A,SRGAP3,KLF9,RALBP1,SLC17A7,WASF1,NPY,HTR1A,TNC,FOSB,PAK5,L1CAM,GABBR2,NXN,LDLR,CREM,CRHR1,EGR1,ATP1A1,RCAN2
Haghl	0.00544612		GO: Cellular Component	GO:1990204	oxidoreductase complex		0.0003763	0.2412	0.00778	0.05478	12	97	NDUFA1,NDUFA2,NDUFA3,NDUFA5,NDUFA6,NDUFB7,NDUFS6,P4HA1,PDK1,UQCR10,DBT,NDUFA13		Rcan2	0.0247359		Mouse Phenotype	MP:0014114	abnormal cognition		0.003717	1	0.2825	1	30	694	KIF21B,CDC42EP4,DACT2,SSTR2,ZDHHC8,CHRM3,CHRNA4,ADCY8,CHRNA7,PER2,TUBA1A,SRGAP3,KLF9,RALBP1,SLC17A7,WASF1,NPY,HTR1A,TNC,FOSB,PAK5,L1CAM,GABBR2,NXN,LDLR,CREM,CRHR1,EGR1,ATP1A1,RCAN2
Hcn4	0.090507		GO: Cellular Component	GO:0098857	membrane microdomain		0.0004334	0.2778	0.008418	0.05927	27	343	LRRK2,SDC4,LAMTOR2,SORBS1,LAMTOR4,HYAL2,TRADD,RIPK1,MYO1D,NEDD4,GNAQ,NTSR1,OPRM1,THY1,HK1,CORO1C,SLC5A7,PGK1,CPE,PPP2R1B,JAK2,NPHS2,DLG1,LDLR,PLLP,SPRED1,EPHB1		Rgs19	0.0430727		Mouse Phenotype	MP:0008272	abnormal endochondral bone ossification		0.00376	1	0.2825	1	10	142	CDKN1A,FGFRL1,PTGS2,XYLT1,BMP2,GLI3,NOV,LASP1,VANGL2,DCHS1
Heca	0.0836757		GO: Cellular Component	GO:0045121	membrane raft		0.0004334	0.2778	0.008418	0.05927	27	343	LRRK2,SDC4,LAMTOR2,SORBS1,LAMTOR4,HYAL2,TRADD,RIPK1,MYO1D,NEDD4,GNAQ,NTSR1,OPRM1,THY1,HK1,CORO1C,SLC5A7,PGK1,CPE,PPP2R1B,JAK2,NPHS2,DLG1,LDLR,PLLP,SPRED1,EPHB1		Rgs3	0.00910506		Mouse Phenotype	MP:0011273	prolonged excitatory postsynaptic current decay time		0.003869	1	0.2825	1	2	4	CDC42EP4,CLSTN1
Heph	0.000275274		GO: Cellular Component	GO:0005789	endoplasmic reticulum membrane		0.0004814	0.3086	0.008945	0.06298	60	994	SIGMAR1,SHISA5,EXTL2,TM6SF2,REEP2,FAAH,HHATL,MGST3,FDFT1,FKBP5,LRRC8C,FMO1,FMO2,FMO5,CLSTN1,PIGZ,RAB21,GALNT1,ERP44,AUP1,OST4,SRI,SSR3,SERP1,MBOAT2,XYLT1,DGAT2,REEP6,ATL2,ALG1,CAMK2G,PDIA3,STT3B,MFSD2A,GUCY2C,TMEM67,HSP90B1,FLRT3,TMX3,DNAJA1,HSPA5,P4HTM,NUS1,DNAJC3,SPTSSA,PIEZO1,INSIG1,SLC35B2,NCLN,RNF43,UBE2J2,POM121,MOGS,ANKRD13C,DHCR24,DLG1,FKBP14,LRRC8D,APH1A,SVIP		Rhou	1.54386e-12		Mouse Phenotype	MP:0013443	Harderian gland hyperplasia		0.003869	1	0.2825	1	2	4	CDKN1A,GLI3
Hhatl	0.0500099		GO: Cellular Component	GO:0044391	ribosomal subunit		0.0004884	0.3131	0.008945	0.06298	17	175	RPL32,RPL36AL,RPL38,RPL39,RPL41,RPLP1,RPS2,RPS11,RPS15,RPS21,RPS25,MRPS28,MRPS18B,MRPS21,MRPL52,MRPL2,RPL19		Rin2	2.04074e-13		Mouse Phenotype	MP:0006026	dilated terminal bronchiole tubes		0.003869	1	0.2825	1	2	4	VANGL2,CELSR1
Higd2a	0.0554796		GO: Cellular Component	GO:0099501	exocytic vesicle membrane		0.0005474	0.3509	0.009483	0.06677	9	61	LRRK2,STX1A,ABCC8,SYN1,SYP,SYT4,SLC30A3,SLC17A7,TMEM163		Rnf144a	0.0656411		Mouse Phenotype	MP:0006051	brainstem hemorrhage		0.003869	1	0.2825	1	2	4	COL4A1,CX3CR1
Hint1	0.0814652		GO: Cellular Component	GO:0030672	synaptic vesicle membrane		0.0005474	0.3509	0.009483	0.06677	9	61	LRRK2,STX1A,ABCC8,SYN1,SYP,SYT4,SLC30A3,SLC17A7,TMEM163		Rnf145	0.000305126		Mouse Phenotype	MP:0010713	corneal-lenticular stalk		0.003869	1	0.2825	1	2	4	PXDN,PAX6
Hipk1	0.0992954		GO: Cellular Component	GO:0098794	postsynapse		0.0007605	0.4875	0.01283	0.09032	32	449	LIN7C,SIGMAR1,ASIC1,LRRK2,CLSTN1,SLC8A2,MT3,FUS,SRI,MPDZ,LIN7B,TSPO,SYN1,GNG3,CAMK2G,NTSR1,OPRM1,P2RX4,RUSC1,CHRM4,CHRNA4,HOMER1,GABBR2,NR1D1,ANKS1B,LRRTM3,ITPKA,KCNN2,SLC17A7,DLG1,FXR1,SEZ6		Rrp8	8.00893e-08		Mouse Phenotype	MP:0011089	perinatal lethality, complete penetrance		0.00393	1	0.2825	1	17	320	CDKN1A,ERBB3,EZH2,CHRNA7,SALL2,STXBP3,GLI3,JAG1,LGR5,NXN,EDNRA,VANGL2,CELSR1,IGF1R,DCHS1,RSPO2,PAX6
Hk1	0.0335004		GO: Cellular Component	GO:1990904	ribonucleoprotein complex		0.0007831	0.5019	0.01287	0.09062	47	745	RPL32,RPL36AL,RPL38,RPL39,RPL41,RPLP1,RPS2,LRRK2,RPS11,RPS15,RPS21,RPS25,NOP10,MRPS28,MRPS18B,NOB1,RPP38,WDR83,MT3,SUGP1,FUS,PTGES3,UTP6,SRP14,SERP1,SF3B3,WBP4,NUP62,HNRNPH1,CIRBP,MRPS21,NOC4L,DHX29,MRPL50,XPO1,IGHMBP2,EIF4A3,DHX15,RBM8A,PIH1D1,RPS6KL1,DYNC1I1,MRPL52,MRPL2,FXR1,MPHOSPH10,RPL19		Rspo2	0.00793607		Mouse Phenotype	MP:0000959	abnormal somatic sensory system morphology		0.003992	1	0.2825	1	31	728	CDKN1A,ERBB3,GJB6,NDP,SSTR2,CHRNA7,HEPH,ALDH1A2,PXDN,UCHL3,JAG1,SEMA6A,MERTK,COL4A1,USP53,CACNB2,TCOF1,L1CAM,LDLR,LFNG,VANGL2,MFSD2A,SCUBE1,CELSR1,IGF1R,SLC25A13,FRZB,DCHS1,PAX6,FZD2,CX3CR1
Hkdc1	0.000107088		GO: Cellular Component	GO:0043209	myelin sheath		0.0009409	0.6031	0.01508	0.1062	18	202	ACTG1,TUBA1B,TUBB4A,TUBB4B,MYO1D,MPDZ,SYN1,GOT2,PDIA3,THY1,PGAM1,CKMT1B,HSPA5,COX6A1,DLG1,DNM1,PLLP,ENO1		Rwdd4a	0.0335618		Mouse Phenotype	MP:0003107	abnormal response to novelty		0.004173	1	0.2862	1	16	295	DACT2,SSTR2,ZDHHC8,CHRNA4,TUBA1A,SRGAP3,RALBP1,WASF1,NPY,TNC,FOSB,PAK5,L1CAM,NXN,LDLR,ATP1A1
Hlf	0.00588071		GO: Cellular Component	GO:0030016	myofibril		0.001002	0.6424	0.01567	0.1103	19	220	ACTA1,ACTG1,S100A1,FHL2,SDC4,MYH7B,KLHL40,FHOD3,SRI,TMOD1,TNNC1,SYNPO2,IGFN1,CFL2,HOMER1,TWF1,KCNN2,FXR1,ENO1		S1pr1	0.0759282		Mouse Phenotype	MP:0011926	abnormal heart valve physiology		0.004182	1	0.2862	1	4	26	ERBB3,FGFRL1,JAG1,PLCE1
Hmgn1	0.0323343		GO: Cellular Component	GO:0097060	synaptic membrane		0.001452	0.9308	0.02216	0.156	23	298	LIN7C,SIGMAR1,OLFM1,CLSTN1,UNC13A,MPDZ,LIN7B,SYP,GRM2,RUSC1,CHRM4,CHRNA4,FLRT3,HOMER1,CPE,GABBR2,ANKS1B,LRRTM3,KCNH1,DLG1,ZNRF2,UNC13C,ENO1		Sall2	0.0900929		Mouse Phenotype	MP:0000564	syndactyly		0.004333	1	0.2918	1	9	122	PCSK5,ZBTB16,BMP2,FREM2,ALDH1A2,GLI3,ADAMTS20,WNT7A,RSPO2
Hnrnph1	0.0505168		GO: Cellular Component	GO:0030133	transport vesicle		0.001582	1	0.02359	0.1661	27	374	LRRK2,STX1B,MME,MT3,ATP6V1G2,SCAMP4,FGFRL1,SEPT6,STX1A,ABCC8,SYN1,SYP,SYT4,IL33,CA4,PCSK1,SLC5A7,CHGA,CADM1,SLC2A8,CPE,SLC30A3,SLC17A7,TMEM163,DNM1,RAB27B,PCSK9		Sc4mol	0.0656411		Mouse Phenotype	MP:0002622	abnormal cochlear hair cell morphology		0.004532	1	0.3003	1	12	194	CDKN1A,GJB6,NDP,JAG1,USP53,LFNG,VANGL2,CELSR1,IGF1R,SLC25A13,DCHS1,FZD2
Homer1	0.0335004		GO: Cellular Component	GO:0030285	integral component of synaptic vesicle membrane		0.001821	1	0.02653	0.1868	3	7	ATP6V1G2,SYP,TMEM163		Scamp2	0.0844835		Mouse Phenotype	MP:0000159	abnormal xiphoid process morphology		0.004781	1	0.3066	1	6	61	CDKN1A,PCSK5,ZBTB16,GLI3,NXN,VANGL2
Hps1	0.0966981		GO: Cellular Component	GO:0044306	neuron projection terminus		0.002029	1	0.02862	0.2015	17	199	LRRK2,KCNIP3,MME,PRSS12,SNCB,UNC13A,SRI,SEPT6,SYN1,SYP,NPY,NTSR1,P2RX4,CHRM4,FLRT3,DIXDC1,HCN4		Scube1	0.0599508		Mouse Phenotype	MP:0002705	dilated renal tubules		0.004822	1	0.3066	1	9	124	CDKN1A,DZIP1L,MTSS1,PTGS2,TFCP2L1,SDC4,COL4A1,DCHS1,FAM20A
Hrh2	0.0893949		GO: Cellular Component	GO:0043292	contractile fiber		0.002054	1	0.02862	0.2015	19	234	ACTA1,ACTG1,S100A1,FHL2,SDC4,MYH7B,KLHL40,FHOD3,SRI,TMOD1,TNNC1,SYNPO2,IGFN1,CFL2,HOMER1,TWF1,KCNN2,FXR1,ENO1		Sdc4	3.7584e-13		Mouse Phenotype	MP:0000183	decreased circulating LDL cholesterol level		0.00488	1	0.3066	1	7	81	CEBPA,ADIPOR2,PCSK9,FMO5,LDLR,ZFYVE28,SLC16A2
Hsdl2	0.0942365		GO: Cellular Component	GO:0022626	cytosolic ribosome		0.00231	1	0.03151	0.2219	12	119	RPL32,RPL36AL,RPL38,RPL39,RPL41,RPLP1,RPS2,RPS11,RPS15,RPS21,RPS25,RPL19		Sel1l3	0.0322883		Mouse Phenotype	MP:0005548	retinal pigment epithelium atrophy		0.005048	1	0.3066	1	3	14	HEPH,MERTK,CX3CR1
Hsp90b1	0.00067138		GO: Cellular Component	GO:0043679	axon terminus		0.002528	1	0.03376	0.2377	16	186	LRRK2,KCNIP3,PRSS12,SNCB,UNC13A,SRI,SEPT6,SYN1,SYP,NPY,NTSR1,P2RX4,CHRM4,FLRT3,DIXDC1,HCN4		Sema6a	0.090267		Mouse Phenotype	MP:0000010	abnormal abdominal fat pad morphology		0.005088	1	0.3066	1	14	248	CDKN1A,CEBPA,CHRM3,DHCR24,ADIPOR2,PNPLA2,GPR12,FMO5,DUSP1,PPARA,LDLR,IGF1R,TRIB1,RCAN2
Hspa5	0.000182777		GO: Cellular Component	GO:0005874	microtubule		0.002601	1	0.03402	0.2396	29	426	WDR81,REEP2,TUBA1B,TUBB3,TUBB4A,TUBB4B,MTUS1,DCTN2,SLC8A2,MT3,GRAMD2B,DYNLL1,HSPH1,TUBGCP2,SERP1,TUBA8,PSRC1,RUSC1,TUBA4A,TUBB2A,NEK7,CYLD,RASSF5,DLG1,KIF5B,DNM1,DYNC1H1,DYNC1I1,TUBD1		Serpinb8	0.00955973		Mouse Phenotype	MP:0005023	abnormal wound healing		0.005118	1	0.3066	1	12	197	DACT2,PTGS2,PER2,SDC4,NOV,POLR2A,PPARA,IGF1R,EGR1,IL6R,CX3CR1,GAB1
Hsph1	0.0764605		GO: Cellular Component	GO:0031970	organelle envelope lumen		0.00279	1	0.03576	0.2518	10	91	UQCC2,CACYBP,GOLPH3,NDUFB7,GFER,PDIA3,COX6B1,COX17,TIMM13,TIMM8B		Setbp1	0.0959914		Mouse Phenotype	MP:0004522	abnormal orientation of cochlear hair cell stereociliary bundles		0.005317	1	0.3066	1	5	44	USP53,VANGL2,CELSR1,DCHS1,FZD2
Htra1	0.0188954		GO: Cellular Component	GO:0031305	integral component of mitochondrial inner membrane		0.00292	1	0.03669	0.2584	5	26	L2HGDH,CHCHD6,SPG7,TMEM11,C19orf70		Sgk3	0.00308166		Mouse Phenotype	MP:0001322	abnormal iris morphology		0.005353	1	0.3066	1	9	126	SPNS2,CHRM3,PXDN,GLI3,JAG1,SDC4,COL4A1,NXN,PAX6
Hus1	0.0431429		GO: Cellular Component	GO:0031304	intrinsic component of mitochondrial inner membrane		0.00347	1	0.04233	0.298	5	27	L2HGDH,CHCHD6,SPG7,TMEM11,C19orf70		Sh3gl3	0.0767899		Mouse Phenotype	MP:0000037	abnormal lateral semicircular canal morphology		0.005501	1	0.3066	1	4	28	GLI3,JAG1,IGF1R,SLC25A13
Hyal2	0.0220718		GO: Cellular Component	GO:0005758	mitochondrial intermembrane space		0.0035	1	0.04233	0.298	9	79	UQCC2,GOLPH3,NDUFB7,GFER,PDIA3,COX6B1,COX17,TIMM13,TIMM8B		Slc10a7	0.0279777		Mouse Phenotype	MP:0003383	abnormal gluconeogenesis		0.005606	1	0.3066	1	6	63	CEBPA,MC2R,ADIPOR2,DUSP1,KLF15,SLC25A13
Hypk	0.0769385		GO: Cellular Component	GO:0044433	cytoplasmic vesicle part		0.003818	1	0.04532	0.3191	38	619	LRRK2,SELENOP,CDC37L1,RAB21,ATP6V1G2,HSPH1,SRI,STX1A,ABCC8,SYN1,SYP,SYT4,CA4,CAMK2G,OCRL,ATG12,PCSK1,TMEM67,HSP90B1,PDGFB,CHGA,WNT4,ZDHHC8,UBB,TMX3,SLC2A8,CPE,YWHAH,ATP6V0E2,PHACTR2,SPIRE1,ISLR,SLC30A3,SLC17A7,TMEM163,RAB27B,ZNRF2,LDLR		Slc16a2	0.0993416		Mouse Phenotype	MP:0003360	abnormal depression-related behavior		0.005635	1	0.3066	1	9	127	SLITRK1,KCNH1,SLC17A7,FKBP5,HTR1A,FOSB,DUSP1,GABBR2,FRZB
Id4	0.0773852		GO: Cellular Component	GO:0048471	perinuclear region of cytoplasm		0.003948	1	0.04601	0.3239	43	724	PLEKHG5,HHATL,MT1A,PACS1,MT2A,MT3,FUS,PTGES3,HYAL2,GALNT1,NXT2,NEDD4,NELL1,TAF8,PER2,DGAT2,SYT4,NPY,CA4,ANGEL1,CCNG1,P2RX4,HSP90B1,CHGA,ZDHHC8,DNAJA1,IGHMBP2,GSDMA,CYLD,SPIRE1,HEPH,TWF1,GDPD5,ANKRD13C,KCNH1,DLG1,KIF5B,DYNC1I1,PCSK9,RAC3,HCN4,FXR1,SEZ6		Slc17a7	0.0989615		Mouse Phenotype	MP:0003308	abnormal cochlear sensory epithelium morphology		0.005764	1	0.3066	1	12	200	CDKN1A,GJB6,NDP,JAG1,USP53,LFNG,VANGL2,CELSR1,IGF1R,SLC25A13,DCHS1,FZD2
Iffo1	0.0703007		GO: Cellular Component	GO:0031371	ubiquitin conjugating enzyme complex		0.004123	1	0.04719	0.3323	3	9	UBE2A,UBE2B,UBE2V1		Slc22a23	0.0261625		Mouse Phenotype	MP:0006059	decreased susceptibility to ischemic brain injury		0.005859	1	0.3066	1	5	45	IL18,PTGS2,PLD1,LDLR,EGR1
Ifrd1	0.0796121		GO: Cellular Component	GO:0097025	MPP7-DLG1-LIN7 complex		0.004413	1	0.04963	0.3495	2	3	LIN7C,DLG1		Slc24a6	0.0279514		Mouse Phenotype	MP:0004399	abnormal cochlear outer hair cell morphology		0.006068	1	0.3066	1	10	152	CDKN1A,NDP,JAG1,USP53,LFNG,VANGL2,CELSR1,IGF1R,DCHS1,FZD2
Ift80	0.0581472		GO: Cellular Component	GO:0044449	contractile fiber part		0.004503	1	0.04977	0.3504	17	215	ACTA1,ACTG1,S100A1,FHL2,SDC4,KLHL40,FHOD3,SRI,TMOD1,TNNC1,SYNPO2,IGFN1,CFL2,HOMER1,KCNN2,FXR1,ENO1		Slc25a13	0.00163953		Mouse Phenotype	MP:0000042	abnormal organ of Corti morphology		0.006229	1	0.3066	1	12	202	CDKN1A,GJB6,NDP,JAG1,USP53,LFNG,VANGL2,CELSR1,IGF1R,SLC25A13,DCHS1,FZD2
Igfn1	0.0893949		GO: Cellular Component	GO:0060076	excitatory synapse		0.004651	1	0.05036	0.3546	19	252	LIN7C,SIGMAR1,STX1B,CLSTN1,MT3,UNC13A,MPDZ,LIN7B,SYN1,SYP,GNG3,CAMK2G,P2RX4,RUSC1,CHRM4,HOMER1,ANKS1B,SLC17A7,DLG1		Slc25a33	0.0289398		Mouse Phenotype	MP:0000045	abnormal hair cell morphology		0.006229	1	0.3066	1	12	202	CDKN1A,GJB6,NDP,JAG1,USP53,LFNG,VANGL2,CELSR1,IGF1R,SLC25A13,DCHS1,FZD2
Ighmbp2	0.0527802		GO: Cellular Component	GO:0032592	integral component of mitochondrial membrane		0.004714	1	0.05036	0.3546	7	54	L2HGDH,FUNDC1,CHCHD6,SPG7,TMEM11,C19orf70,TOMM7		Slc29a2	0.0872598		Mouse Phenotype	MP:0010564	abnormal fetal ductus arteriosus morphology		0.006254	1	0.3066	1	4	29	PCSK5,PTGS2,JAG1,EDNRA
Igsf1	0.0619908		GO: Cellular Component	GO:0030426	growth cone		0.005058	1	0.05315	0.3742	15	182	SIGMAR1,LRRK2,BASP1,OLFM1,DCTN2,ORAI2,SNCB,THY1,FLRT3,IGHMBP2,RTN4R,GDPD5,STMN4,KIF5B,RAC3		Slc29a3	0.0957316		Mouse Phenotype	MP:0004407	increased cochlear hair cell number		0.006254	1	0.3066	1	4	29	CDKN1A,JAG1,LFNG,VANGL2
Il33	0.040646		GO: Cellular Component	GO:0005795	Golgi stack		0.005394	1	0.05576	0.3926	12	132	BET1L,FUT11,RAB21,GALNT1,GOLPH3,B4GALNT4,OCRL,B4GALT7,B4GALT5,RAB27B,APH1A,GOLGA7		Slc38a2	0.0385972		Mouse Phenotype	MP:0010258	polar cataracts		0.006338	1	0.3066	1	2	5	COL4A1,PAX6
Impa1	0.0917791		GO: Cellular Component	GO:0005868	cytoplasmic dynein complex		0.005507	1	0.05603	0.3945	4	19	DYNLL1,DYNC1H1,DYNC1I1,WDR34		Slc4a11	0.00278034		Mouse Phenotype	MP:0009800	abnormal mandibular nerve morphology		0.006338	1	0.3066	1	2	5	ERBB3,EDNRA
Insig1	0.000961672		GO: Cellular Component	GO:0098573	intrinsic component of mitochondrial membrane		0.005775	1	0.05784	0.4073	7	56	L2HGDH,FUNDC1,CHCHD6,SPG7,TMEM11,C19orf70,TOMM7		Slc7a8	0.0289398		Mouse Phenotype	MP:0010259	anterior polar cataracts		0.006338	1	0.3066	1	2	5	COL4A1,PAX6
Ints5	0.0873357		GO: Cellular Component	GO:0043197	dendritic spine		0.006106	1	0.06021	0.424	13	151	ASIC1,SLC8A2,MT3,FUS,SRI,NTSR1,P2RX4,NR1D1,ANKS1B,ITPKA,KCNN2,FXR1,SEZ6		Slitrk1	0.0123325		Mouse Phenotype	MP:0006200	vitreous body deposition		0.006338	1	0.3066	1	2	5	NDP,PXDN
Ipo7	0.0763474		GO: Cellular Component	GO:0030427	site of polarized growth		0.006468	1	0.06282	0.4423	15	187	SIGMAR1,LRRK2,BASP1,OLFM1,DCTN2,ORAI2,SNCB,THY1,FLRT3,IGHMBP2,RTN4R,GDPD5,STMN4,KIF5B,RAC3		Smim3	1.60864e-25		Mouse Phenotype	MP:0005529	abnormal renal vascular resistance		0.006338	1	0.3066	1	2	5	MAS1,NT5E
Ipo8	0.0842443		GO: Cellular Component	GO:0015935	small ribosomal subunit		0.006708	1	0.06413	0.4515	8	72	RPS2,RPS11,RPS15,RPS21,RPS25,MRPS28,MRPS18B,MRPS21		Snrnp48	0.018517		Mouse Phenotype	MP:0012523	abnormal upper lip morphology		0.006437	1	0.3066	1	5	46	DZIP1L,GLDC,GLI3,TCOF1,RSPO2
Irs4	0.0188762		GO: Cellular Component	GO:0044309	neuron spine		0.006803	1	0.06413	0.4515	13	153	ASIC1,SLC8A2,MT3,FUS,SRI,NTSR1,P2RX4,NR1D1,ANKS1B,ITPKA,KCNN2,FXR1,SEZ6		Sowaha	0.0234722		Mouse Phenotype	MP:0004426	abnormal cochlear labyrinth morphology		0.006535	1	0.3066	1	13	229	CDKN1A,GJB6,NDP,JAG1,USP53,LFNG,VANGL2,CELSR1,IGF1R,SLC25A13,DCHS1,FZD2,SLC4A11
Islr	0.0783716		GO: Cellular Component	GO:0044853	plasma membrane raft		0.007731	1	0.07182	0.5057	10	105	LRRK2,SORBS1,MYO1D,GNAQ,HK1,CORO1C,SLC5A7,JAK2,LDLR,SPRED1		Sox13	0.00858036		Mouse Phenotype	MP:0003169	abnormal scala media morphology		0.006535	1	0.3066	1	13	229	CDKN1A,GJB6,NDP,JAG1,USP53,LFNG,VANGL2,CELSR1,IGF1R,SLC25A13,DCHS1,FZD2,SLC4A11
Isoc1	0.0799804		GO: Cellular Component	GO:0043034	costamere		0.007996	1	0.07322	0.5155	4	21	ACTG1,SDC4,HOMER1,FXR1		Spns2	0.00280079		Mouse Phenotype	MP:0001302	eyelids open at birth		0.006766	1	0.3139	1	7	86	CEBPA,INHBB,SPNS2,GLI3,EDNRA,VANGL2,GAB1
Itpka	0.0762136		GO: Cellular Component	GO:0005912	adherens junction		0.00835	1	0.07539	0.5308	30	484	RPL38,LIN7C,RPLP1,RPS2,RPS11,RPS15,ACTG1,MME,FHL2,SDC4,SORBS1,RND3,RAB21,CADM3,TSPAN9,WASF1,PDIA3,OPRM1,THY1,HSP90B1,SYNPO2,CORO1C,CADM1,FLRT3,HSPA5,DIXDC1,AHI1,TWF1,DLG1,RPL19		Sprn	0.0145506		Mouse Phenotype	MP:0005253	abnormal eye physiology		0.006922	1	0.3175	1	23	512	CDO1,IL18,CEBPA,INHBB,SPNS2,HAPLN2,CCND1,CHRM3,HEPH,PXDN,PER2,UCHL3,SLC17A7,MERTK,COL4A1,CACNB2,L1CAM,LDLR,CRHR1,MFSD2A,EGR1,LHFPL2,PAX6
Jak2	0.0554796		GO: Cellular Component	GO:0032580	Golgi cisterna membrane		0.008546	1	0.07547	0.5314	8	75	FUT11,RAB21,GALNT1,GOLPH3,B4GALNT4,B4GALT7,B4GALT5,APH1A		Spry3	0.00507436		Mouse Phenotype	MP:0003864	abnormal midbrain development		0.007055	1	0.3175	1	5	47	ERBB3,PIK3C2A,TCOF1,VANGL2,EGR1
Kcnd1	0.0119961		GO: Cellular Component	GO:0005642	annulate lamellae		0.008595	1	0.07547	0.5314	2	4	NUP62,XPO1		Srgap2	0.0456939		Mouse Phenotype	MP:0005099	abnormal ciliary body morphology		0.007072	1	0.3175	1	4	30	SPNS2,HEPH,PXDN,PAX6
Kcnh1	0.0274938		GO: Cellular Component	GO:0034663	endoplasmic reticulum chaperone complex		0.009896	1	0.08572	0.6036	3	12	HSP90B1,HSPA5,PDIA4		Sstr2	0.000341597		Mouse Phenotype	MP:0001319	irregularly shaped pupil		0.007475	1	0.3285	1	3	16	JAG1,COL4A1,PAX6
Kcnh4	0.0266797		Mouse Phenotype	MP:0002206	abnormal CNS synaptic transmission		2.467e-06	0.01016	0.005739	0.05108	54	671	LIN7C,ASIC1,KCNIP3,STX1B,FABP7,SCN9A,TRIB2,SH3GL3,CLSTN1,TRIM3,SLC8A2,UNC13A,SST,LIN7B,NELL2,STX1A,SYN1,SYP,GNAQ,WASF1,DAGLA,NTSR1,GRM2,OPRM1,THY1,P2RX4,CD47,RIMBP2,SLC24A5,HMGN1,ZDHHC8,CHRM4,CHRNA4,CKMT1B,UBE2A,HOMER1,CPE,GABBR2,CRHR1,CRMP1,CTSK,RNF112,ANKS1B,ITPKA,SLC17A7,TMEM163,DNM1,RARB,PRRT2,MBNL2,SPRED1,UNC13C,EMX1,SEZ6		St3gal1	0.000690574		Mouse Phenotype	MP:0005239	abnormal Bruch membrane morphology		0.007475	1	0.3285	1	3	16	HEPH,LDLR,CX3CR1
Kcnip3	0.0474883		Mouse Phenotype	MP:0003635	abnormal synaptic transmission		2.787e-06	0.01148	0.005739	0.05108	59	762	LIN7C,ASIC1,LRRK2,KCNIP3,STX1B,FAAH,FABP7,SCN9A,TRIB2,SH3GL3,CLSTN1,TRIM3,SLC8A2,UNC13A,ARPP21,SST,SSTR2,LIN7B,NELL2,STX1A,SYN1,SYP,GNAQ,WASF1,DAGLA,NTSR1,GRM2,OPRM1,THY1,P2RX4,CD47,RIMBP2,SLC24A5,SLC5A7,HMGN1,ZDHHC8,CHRM4,CHRNA4,CKMT1B,UBE2A,HOMER1,CPE,GABBR2,CRHR1,CRMP1,CTSK,RNF112,ANKS1B,ITPKA,SLC17A7,TMEM163,DNM1,RARB,PRRT2,MBNL2,SPRED1,UNC13C,EMX1,SEZ6		St6galnac5	0.0147152		Mouse Phenotype	MP:0004192	abnormal kidney pyramid morphology		0.007958	1	0.3292	1	4	31	CDKN1A,PTGS2,COL4A1,ADAMTS1
Kcnk4	0.0508192		Mouse Phenotype	MP:0014114	abnormal cognition		6.748e-06	0.0278	0.009265	0.08247	54	694	ASIC1,DACT2,L2HGDH,KCNIP3,FABP7,S100A1,PTCHD1,SELENOP,TRIB2,ARSG,SLC8A2,SST,SSTR2,STX1A,PER2,SYN1,GMFB,SYT4,TACR3,UHRF2,WASF1,NPY,NPY2R,OPRM1,CD47,PBX3,PCP4,ZDHHC8,CHRNA4,CKMT1B,KL,UBE2A,HOMER1,ANAPC13,GNPTAB,GABBR2,CREM,CRHR1,CRMP1,RTN4R,SPIRE1,GDPD5,MOGS,SLC17A7,TMEM163,RAC3,RARB,LDLR,MBNL2,SPRED1,UNC13C,EMX1,RCAN2,SEZ6		Stxbp3a	0.0385972		Mouse Phenotype	MP:0005537	abnormal cerebral aqueduct morphology		0.007958	1	0.3292	1	4	31	DLG5,ERBB3,GLI3,L1CAM
Kcnn2	0.0188954		Mouse Phenotype	MP:0002063	abnormal learning/memory/conditioning		1.357e-05	0.05591	0.01398	0.1244	53	693	ASIC1,DACT2,L2HGDH,KCNIP3,FABP7,S100A1,PTCHD1,SELENOP,TRIB2,ARSG,SLC8A2,SST,SSTR2,STX1A,PER2,SYN1,GMFB,SYT4,TACR3,UHRF2,WASF1,NPY,NPY2R,OPRM1,CD47,PBX3,PCP4,ZDHHC8,CHRNA4,CKMT1B,KL,UBE2A,HOMER1,ANAPC13,GABBR2,CREM,CRHR1,CRMP1,RTN4R,SPIRE1,GDPD5,MOGS,SLC17A7,TMEM163,RAC3,RARB,LDLR,MBNL2,SPRED1,UNC13C,EMX1,RCAN2,SEZ6		Sult1a1	5.08767e-13		Mouse Phenotype	MP:0010684	abnormal hair follicle outer root sheath morphology		0.007958	1	0.3292	1	4	31	CEBPA,EZH2,SGK3,POLR2A
Kctd12b	0.0900094		Mouse Phenotype	MP:0002912	abnormal excitatory postsynaptic potential		3.877e-05	0.1597	0.03194	0.2843	15	107	ASIC1,TRIB2,CLSTN1,SST,STX1A,SYN1,WASF1,GRM2,OPRM1,CD47,SLC17A7,RARB,MBNL2,SPRED1,SEZ6		Svil	0.000162272		Mouse Phenotype	MP:0002206	abnormal CNS synaptic transmission		0.008069	1	0.3292	1	28	671	CDC42EP4,MAS1,NTSR2,ZDHHC8,CHRM3,PTGS2,CHRNA4,ADCY8,CHRNA7,CNIH3,NELL2,SRGAP3,RALBP1,SLC17A7,SYP,SEMA6A,WASF1,TNC,FOSB,L1CAM,SH3GL3,GABBR2,GRM2,CLSTN1,CRHR1,EDNRA,CCKBR,PAX6
Kif5b	0.0913722		Mouse Phenotype	MP:0012316	enhanced conditioning behavior		4.928e-05	0.203	0.03383	0.3011	9	42	KCNIP3,FABP7,SLC8A2,PER2,OPRM1,CHRNA4,HOMER1,SPIRE1,TMEM163		Swap70	0.0192294		Mouse Phenotype	MP:0000149	abnormal scapula morphology		0.008117	1	0.3292	1	6	68	CDKN1A,BMP2,GLI3,WNT7A,CXXC5,RSPO2
Kirrel2	0.000834428		Mouse Phenotype	MP:0004770	abnormal synaptic vesicle recycling		9.137e-05	0.3764	0.05377	0.4786	6	19	STX1B,SH3GL3,UNC13A,STX1A,SYN1,DNM1		Synpo2	0.000764317		Mouse Phenotype	MP:0010953	abnormal fatty acid oxidation		0.008413	1	0.3292	1	5	49	NADK2,PNPLA2,FMO5,PPARA,MFSD2A
Kitl	0.0757075		Mouse Phenotype	MP:0009355	increased liver triglyceride level		0.0001654	0.6814	0.08517	0.7581	14	108	TM6SF2,HKDC1,NADK2,GFER,NPY,NPY2R,GUCY2C,CHKA,NUS1,INSIG1,TMEM163,SESN2,LDLR,ABHD5		Syp	0.0824392		Mouse Phenotype	MP:0004406	abnormal cochlear hair cell number		0.008702	1	0.3292	1	6	69	CDKN1A,JAG1,LFNG,VANGL2,IGF1R,FZD2
Kl	0.0619908		Mouse Phenotype	MP:0002915	abnormal synaptic depression		0.0003304	1	0.1512	1	15	129	SH3GL3,SLC8A2,UNC13A,STX1A,SYN1,GNAQ,WASF1,DAGLA,GRM2,CHRM4,UBE2A,ANKS1B,RARB,SPRED1,EMX1		Tceal6	0.0324703		Mouse Phenotype	MP:0003843	abnormal sagittal suture morphology		0.008906	1	0.3292	1	3	17	GLI3,WNT9A,EDNRA
Klhl1	0.0497804		Mouse Phenotype	MP:0009713	enhanced conditioned place preference behavior		0.0005317	1	0.219	1	4	10	PER2,OPRM1,CHRNA4,HOMER1		Tcof1	0.0687999		Mouse Phenotype	MP:0001748	increased circulating adrenocorticotropin level		0.008906	1	0.3292	1	3	17	MC2R,SSTR2,CRHR1
Klhl40	0.000194161		Mouse Phenotype	MP:0002910	abnormal excitatory postsynaptic currents		0.0007929	1	0.2969	1	15	140	LIN7C,STX1B,SH3GL3,CLSTN1,UNC13A,LIN7B,STX1A,DAGLA,RIMBP2,GABBR2,ANKS1B,SLC17A7,DNM1,EMX1,SEZ6		Tesk2	0.0257858		Mouse Phenotype	MP:0006221	optic nerve hypoplasia		0.008906	1	0.3292	1	3	17	PXDN,COL4A1,PAX6
L2hgdh	0.0825058		Mouse Phenotype	MP:0002572	abnormal emotion/affect behavior		0.0009518	1	0.3199	1	44	645	MKKS,SIGMAR1,DACT2,KCNIP3,FAAH,FABP7,S100A1,PTCHD1,FKBP5,TRIB2,PRSS12,ARSG,GJB6,SSTR2,STX1A,PER3,SYN1,TACR3,WASF1,NPY,NPY2R,GRM2,OPRM1,CD47,PBX3,ZDHHC8,CHRNA4,B4GALT5,CKMT1B,ANAPC13,GABBR2,CREM,CRHR1,DIXDC1,AHI1,RTN4R,GDPD5,MOGS,KCNH1,SLC17A7,TMEM163,LDLR,SPRED1,EMX1		Tfcp2l1	0.00730342		Mouse Phenotype	MP:0003194	abnormal frequency of paradoxical sleep		0.008906	1	0.3292	1	3	17	CHRM3,HTR1A,FOSB
Lamtor2	0.060426		Mouse Phenotype	MP:0004994	abnormal brain wave pattern		0.00101	1	0.3199	1	10	74	SSTR2,PER3,PER2,SYN1,GNG3,CHRM4,CHRNA4,GABBR2,DNM1,EMX1		Tmeff2	0.0557718		Mouse Phenotype	MP:0002258	abnormal cricoid cartilage morphology		0.008906	1	0.3292	1	3	17	FGFRL1,ALDH1A2,RSPO2
Lamtor4	0.0729396		Mouse Phenotype	MP:0011270	decreased excitatory postsynaptic current amplitude		0.001119	1	0.3292	1	6	29	STX1B,SH3GL3,STX1A,RIMBP2,DNM1,SEZ6		Tmem120a	0.0964086		Mouse Phenotype	MP:0013544	abnormal merocrine gland morphology		0.009146	1	0.3292	1	7	91	CDKN1A,CHRNA7,TFCP2L1,PER2,GLI3,EDNRA,PAX6
Ldlr	0.00630081		Mouse Phenotype	MP:0000071	axial skeleton hypoplasia		0.001348	1	0.3484	1	3	6	FGFRL1,PAPSS2,PTPRS		Tmem184b	0.0630255		Mouse Phenotype	MP:0003014	abnormal kidney medulla morphology		0.009318	1	0.3292	1	6	70	CDKN1A,DZIP1L,PTGS2,SDC4,COL4A1,ADAMTS1
Leprel2	0.0580566		Mouse Phenotype	MP:0020167	abnormal vertical activity		0.001354	1	0.3484	1	20	226	L2HGDH,SELENOP,TRIB2,GJB6,SSTR2,NPY,NTSR1,OPRM1,MFSD2A,CDH4,HMGN1,CHRNA4,CKMT1B,CPE,NR1D1,DIXDC1,IMPA1,RTN4R,S1PR3,SEZ6		Tmem203	0.0170514		Mouse Phenotype	MP:0011987	abnormal GABAergic neuron physiology		0.009345	1	0.3292	1	2	6	CHRNA7,GRM2
Lgalsl	0.0482688		Mouse Phenotype	MP:0001898	abnormal long term depression		0.001915	1	0.4639	1	11	94	SLC8A2,UNC13A,GNAQ,WASF1,DAGLA,GRM2,UBE2A,ANKS1B,RARB,SPRED1,EMX1		Tmem97	0.044192		Mouse Phenotype	MP:0009555	abnormal hair follicle melanin granule distribution		0.009345	1	0.3292	1	2	6	ADAMTS20,MLPH
Lin7b	0.0962191		Mouse Phenotype	MP:0002207	abnormal long term potentiation		0.002161	1	0.4791	1	20	235	ASIC1,KCNIP3,TRIB2,CLSTN1,SLC8A2,NELL2,STX1A,SYP,WASF1,OPRM1,THY1,P2RX4,CRMP1,ITPKA,SLC17A7,TMEM163,RARB,MBNL2,SPRED1,EMX1		Tnc	0.0279514		Mouse Phenotype	MP:0013446	enlarged Harderian gland		0.009345	1	0.3292	1	2	6	CDKN1A,GLI3
Lin7c	0.0705894		Mouse Phenotype	MP:0010987	abnormal nephrogenic mesenchyme morphogenesis		0.002286	1	0.4791	1	3	7	FGFRL1,WNT4,RARB		Tnfrsf19	0.039523		Mouse Phenotype	MP:0008159	increased diameter of fibula		0.009345	1	0.3292	1	2	6	ZBTB16,CXXC5
Lin9	0.0757075		Mouse Phenotype	MP:0009538	abnormal synapse morphology		0.002525	1	0.4791	1	18	205	STX1B,BASP1,SH3GL3,RND3,UNC13A,STX1A,GPT2,SLC5A7,ZDHHC8,TMEM184B,GABBR2,IGHMBP2,SLC30A3,SLC17A7,DNM1,PRRT2,LDLR,MBNL2		Tpm3	0.0297521		Mouse Phenotype	MP:0002671	belted		0.009345	1	0.3292	1	2	6	GLI3,ADAMTS20
Lingo1	0.0466999		Mouse Phenotype	MP:0004859	abnormal synaptic plasticity		0.00254	1	0.4791	1	9	70	SLC8A2,STX1A,SYP,RIMBP2,PCP4,GABBR2,ANKS1B,PRRT2,MBNL2		Trabd2b	1.18276e-05		Mouse Phenotype	MP:0000640	adrenal gland hypoplasia		0.009345	1	0.3292	1	2	6	MC2R,CRHR1
Lonrf3	0.0177102		Mouse Phenotype	MP:0001468	abnormal temporal memory		0.002559	1	0.4791	1	17	189	KCNIP3,FABP7,PTCHD1,SLC8A2,STX1A,SYT4,UHRF2,NPY2R,KL,UBE2A,HOMER1,GABBR2,CREM,SPIRE1,SLC17A7,TMEM163,EMX1		Trib1	0.0432468		Mouse Phenotype	MP:0006394	abnormal vertebral epiphyseal plate morphology		0.009345	1	0.3292	1	2	6	LASP1,VANGL2
Lpcat4	0.0297954		Mouse Phenotype	MP:0001469	abnormal contextual conditioning behavior		0.002682	1	0.4802	1	15	158	KCNIP3,FABP7,PTCHD1,SLC8A2,STX1A,SYT4,UHRF2,KL,UBE2A,HOMER1,GABBR2,CREM,SPIRE1,TMEM163,EMX1		Trim36	0.00630689		Mouse Phenotype	MP:0008818	abnormal interfrontal bone morphology		0.009345	1	0.3292	1	2	6	GLI3,WNT9A
Lrrc58	0.0757075		Mouse Phenotype	MP:0002918	abnormal paired-pulse facilitation		0.003088	1	0.5145	1	9	72	SLC8A2,STX1A,SYN1,SYP,RIMBP2,RNF112,SPRED1,UNC13C,EMX1		Trp53bp2	0.0609979		Mouse Phenotype	MP:0002959	increased urine microalbumin level		0.009345	1	0.3292	1	2	6	MAS1,COL4A1
Lrrc8c	0.0884049		Mouse Phenotype	MP:0001463	abnormal spatial learning		0.003503	1	0.5145	1	20	245	ASIC1,L2HGDH,KCNIP3,SELENOP,ARSG,SLC8A2,TACR3,WASF1,NPY2R,OPRM1,CKMT1B,UBE2A,CRMP1,RTN4R,TMEM163,RARB,LDLR,SPRED1,EMX1,SEZ6		Tsc22d3	8.84322e-35		Mouse Phenotype	MP:0002864	abnormal ocular fundus morphology		0.00972	1	0.3292	1	29	712	IL18,SPNS2,CCND1,FJX1,NDP,SSTR2,PTGS2,CHRNA7,HEPH,PXDN,PER2,GLI3,UCHL3,JAG1,SEMA6A,MERTK,NOTCH4,COL4A1,CYP4V2,CACNB2,L1CAM,LDLR,S1PR1,LFNG,MFSD2A,EGR1,LHFPL2,PAX6,CX3CR1
Lrrc8d	0.0911091		Mouse Phenotype	MP:0009357	abnormal seizure response to inducing agent		0.003542	1	0.5145	1	17	195	L2HGDH,SCN9A,TRIM3,SYN1,GNG3,NPY,NPY2R,SLC7A8,CHRNA4,PLCL1,CREM,IMPA1,DNM1,PRRT2,MBNL2,EMX1,SEZ6		Tuba1a	0.098447		Mouse Phenotype	MP:0004860	dilated kidney collecting duct		0.009941	1	0.3292	1	4	33	DLG5,DZIP1L,COL4A1,DCHS1
Lrrk2	0.0787216		Mouse Phenotype	MP:0002665	decreased circulating corticosterone level		0.003578	1	0.5145	1	6	36	FKBP5,NPY2R,HMGN1,CRHR1,TSC22D3,LDLR		Uchl3	0.0127818		Mouse Phenotype	MP:0004394	abnormal cochlear inner hair cell number		0.009941	1	0.3292	1	4	33	CDKN1A,JAG1,LFNG,IGF1R
Lrrn3	0.0471429		Mouse Phenotype	MP:0002757	decreased vertical activity		0.003615	1	0.5145	1	15	163	SELENOP,TRIB2,GJB6,SSTR2,NPY,MFSD2A,CDH4,HMGN1,CKMT1B,CPE,NR1D1,DIXDC1,RTN4R,S1PR3,SEZ6		Usp40	0.0153685		Mouse Phenotype	MP:0004400	abnormal cochlear outer hair cell number		0.009941	1	0.3292	1	5	51	CDKN1A,JAG1,LFNG,VANGL2,IGF1R
Lrrtm3	0.0807361		Mouse Phenotype	MP:0009745	abnormal behavioral response to xenobiotic		0.003667	1	0.5145	1	23	298	LRRK2,L2HGDH,FAAH,TRIM3,MPDZ,PER2,NPY,NPY2R,GRM2,OPRM1,SLC7A8,CHRM4,CHRNA4,PLCL1,HOMER1,GABBR2,CRHR1,IMPA1,ANKS1B,PRRT2,MBNL2,EMX1,SEZ6		Usp43	0.0146244		Mouse Phenotype	MP:0004408	decreased cochlear hair cell number		0.009941	1	0.3292	1	5	51	CDKN1A,JAG1,LFNG,VANGL2,IGF1R
Lsm12	0.0274106		Mouse Phenotype	MP:0012315	impaired learning		0.003766	1	0.5145	1	10	88	L2HGDH,PTCHD1,ARSG,SYN1,SYT4,TACR3,UBE2A,GABBR2,TMEM163,EMX1		Usp53	0.0171374		Pathway	169353	Validated targets of C-MYC transcriptional repression	BioSystems: Pathway Interaction Database	0.0002481	0.364	0.1395	1	7	61	CDKN1A,CEBPA,CCND1,HMGCS2,TMEFF2,NFYA,MXD4
Map2k3	0.0856406		Mouse Phenotype	MP:0009453	enhanced contextual conditioning behavior		0.004086	1	0.5145	1	5	26	KCNIP3,FABP7,SLC8A2,SPIRE1,TMEM163		Usp54	0.00112599		Pathway	1268830	Voltage gated Potassium channels	BioSystems: REACTOME	0.0002668	0.3914	0.1395	1	6	44	KCNA6,KCNC4,KCND1,KCNF1,KCNH1,KCNS2
Map3k19	0.0177526		Mouse Phenotype	MP:0011267	abnormal excitatory postsynaptic current amplitude		0.004122	1	0.5145	1	6	37	STX1B,SH3GL3,STX1A,RIMBP2,DNM1,SEZ6		Vangl2	0.0160688		Pathway	83014	Nicotinate and nicotinamide metabolism	BioSystems: KEGG	0.0002853	0.4186	0.1395	1	5	29	NADK2,NUDT12,NT5E,CD38,NT5C2
Matn2	0.0560366		Mouse Phenotype	MP:0003368	decreased circulating glucocorticoid level		0.004122	1	0.5145	1	6	37	FKBP5,NPY2R,HMGN1,CRHR1,TSC22D3,LDLR		Vgll4	0.0396333		Pathway	83053	Neuroactive ligand-receptor interaction	BioSystems: KEGG	0.0006642	0.9744	0.2048	1	15	278	MAS1,MC2R,NTSR2,SSTR2,CHRM3,CHRNA4,CHRNA7,NMBR,HTR1A,GABBR2,GRM2,S1PR1,CRHR1,EDNRA,CCKBR
Mbnl2	0.0814652		Mouse Phenotype	MP:0008143	abnormal dendrite morphology		0.004416	1	0.5349	1	18	216	LRRK2,WDR81,ACTL6B,PRSS12,CLSTN1,CCND2,CD47,ZDHHC8,HOMER1,NR1D1,CRMP1,RNF112,SPIRE1,FJX1,DLG1,DNM1,EMX1,SEZ6		Vstm4	0.0989615		Pathway	1017634	cAMP signaling pathway	BioSystems: KEGG	0.0008389	1	0.2048	1	12	198	MC2R,SSTR2,ADCY8,GLI3,PLD1,NPY,HTR1A,PPARA,GABBR2,EDNRA,ATP1A1,PLCE1
Mcm5	0.0142202		Mouse Phenotype	MP:0013227	small brain ventricles		0.005152	1	0.5908	1	3	9	ID4,RBM8A,EMX1		Wasf1	0.0101912		Pathway	1268821	Potassium Channels	BioSystems: REACTOME	0.001071	1	0.2048	1	8	100	KCNA6,KCNC4,KCND1,KCNF1,KCNH1,KCNN2,KCNS2,GABBR2
Med27	0.0884049		Mouse Phenotype	MP:0014145	increased white adipose tissue mass		0.005164	1	0.5908	1	2	3	NPY,NPY2R		Wnt7a	8.12508e-05		Pathway	PW:0000074	lysine biosynthetic	Pathway Ontology	0.001256	1	0.2048	1	2	3	CROT,AASS
Mettl22	0.0830266		Mouse Phenotype	MP:0001362	abnormal anxiety-related response		0.005878	1	0.6416	1	25	346	KCNIP3,FAAH,FABP7,S100A1,FKBP5,PRSS12,GJB6,SSTR2,STX1A,WASF1,NPY,NPY2R,GRM2,OPRM1,CHRNA4,B4GALT5,GABBR2,CREM,CRHR1,DIXDC1,SLC17A7,TMEM163,LDLR,SPRED1,EMX1		Wnt9a	0.00248658		Pathway	1270201	FMO oxidises nucleophiles	BioSystems: REACTOME	0.001256	1	0.2048	1	2	3	FMO1,FMO2
Mettl9	0.0807361		Mouse Phenotype	MP:0002062	abnormal associative learning		0.005919	1	0.6416	1	23	310	ASIC1,KCNIP3,FABP7,PTCHD1,ARSG,SLC8A2,STX1A,PER2,GMFB,SYT4,TACR3,UHRF2,OPRM1,CD47,CHRNA4,KL,UBE2A,HOMER1,GABBR2,CREM,SPIRE1,TMEM163,EMX1		Xylt1	0.00910506		Pathway	PW:0000087	G1 phase	Pathway Ontology	0.001256	1	0.2048	1	2	3	CCND1,E2F5
Mex3c	0.0803935		Mouse Phenotype	MP:0001363	increased anxiety-related response		0.006149	1	0.6494	1	17	206	KCNIP3,FABP7,FKBP5,PRSS12,GJB6,SSTR2,NPY,OPRM1,CHRNA4,B4GALT5,GABBR2,CREM,CRHR1,DIXDC1,SLC17A7,SPRED1,EMX1		Zbtb16	2.44825e-21		Pathway	83105	Pathways in cancer	BioSystems: KEGG	0.001425	1	0.209	1	18	395	CDKN1A,TPM3,ZBTB16,CEBPA,CCND1,PTGS2,ADCY8,BMP2,RALBP1,GLI3,PLD1,COL4A1,WNT7A,WNT9A,CCDC6,EDNRA,IGF1R,FZD2
Mfap3	0.0769385		Mouse Phenotype	MP:0002065	abnormal fear/anxiety-related behavior		0.006576	1	0.6771	1	27	386	KCNIP3,FAAH,FABP7,S100A1,FKBP5,PRSS12,ARSG,GJB6,SSTR2,STX1A,TACR3,WASF1,NPY,NPY2R,GRM2,OPRM1,CHRNA4,B4GALT5,GABBR2,CREM,CRHR1,DIXDC1,SLC17A7,TMEM163,LDLR,SPRED1,EMX1		Zdhhc22	0.0279777		Pathway	P00012	Cadherin signaling pathway	PantherDB	0.001704	1	0.2272	1	10	159	ERBB3,PCDHGC5,PCDHGC4,PCDHGB3,PCDHGA4,WNT7A,WNT9A,CELSR1,DCHS1,FZD2
Mfsd2a	0.00174623		Mouse Phenotype	MP:0002573	behavioral despair		0.006922	1	0.6831	1	6	41	SIGMAR1,PER3,CD47,AHI1,SLC17A7,EMX1		Zdhhc8	0.0483563		Pathway	M5493	Genes related to Wnt-mediated signal transduction	MSigDB C2 BIOCARTA (v6.0)	0.002405	1	0.2423	1	7	89	KREMEN1,CCND1,RHOU,WNT7A,WNT9A,FRZB,FZD2
Mfsd4	0.00330834		Mouse Phenotype	MP:0002064	seizures		0.007031	1	0.6831	1	27	388	L2HGDH,STX1B,SCN9A,SH3GL3,TRIM3,RND3,ATOX1,SST,SYN1,SYP,GNAQ,GNG3,NPY,NPY2R,SLC7A8,CHRNA4,PLCL1,GABBR2,CREM,ZNF24,IMPA1,TMEM163,DNM1,PRRT2,MBNL2,EMX1,SEZ6		Zfand4	0.0112787		Pathway	1470923	Interleukin-4 and 13 signaling	BioSystems: REACTOME	0.002475	1	0.2423	1	8	114	CDKN1A,IL18,CCND1,BCL6,PTGS2,RHOU,S1PR1,IL6R
Mfsd8	0.032315		Mouse Phenotype	MP:0009774	abnormal behavioral withdrawal response		0.007131	1	0.6831	1	3	10	MPDZ,OPRM1,CRHR1		Zfp191	0.0245427		Pathway	545361	thyroid hormone metabolism II (via conjugation and/or degradation)	BioSystems: BIOCYC	0.002478	1	0.2423	1	2	4	SULT1A1,DIO2
Mgea5	0.0460074		Mouse Phenotype	MP:0002919	enhanced paired-pulse facilitation		0.007797	1	0.7299	1	6	42	SLC8A2,STX1A,SYN1,RIMBP2,SPRED1,UNC13C		Zfp940	0.0109665		Pathway	P02769	Purine metabolism	PantherDB	0.002478	1	0.2423	1	2	4	AMPD3,NT5E
Mgst3	0.0630565		Mouse Phenotype	MP:0002888	abnormal NMDA-mediated synaptic currents		0.008884	1	0.8132	1	5	31	FABP7,CLSTN1,WASF1,TMEM163,EMX1		Zfyve28	0.0220706		Pathway	946598	Thyroid hormone signaling pathway	BioSystems: KEGG	0.002759	1	0.2529	1	8	116	CCND1,DIO2,MED27,NOTCH4,SLC16A2,ATP1A1,RCAN2,PLCE1
Mical3	0.0630565		Mouse Phenotype	MP:0012778	abnormal liver triglyceride level		0.009861	1	0.8475	1	15	182	TM6SF2,HKDC1,NADK2,GFER,NPY,NPY2R,GUCY2C,CHKA,NR1D1,NUS1,INSIG1,TMEM163,SESN2,LDLR,ABHD5		Zmynd8	0.00330264		Pathway	1270154	Nicotinate metabolism	BioSystems: REACTOME	0.003186	1	0.275	1	4	30	PTGS2,NUDT12,NT5E,CD38
Micalcl	0.00682053		Pathway	82942	Oxidative phosphorylation	BioSystems: KEGG	1.021e-07	0.000198	0.000198	0.001613	21	133	ATP5F1E,ATP5ME,ATP5PF,ATP6V1G2,NDUFA1,NDUFA2,NDUFA3,NDUFA5,NDUFA6,NDUFB7,NDUFS6,UQCR11,ATP6V1F,UQCR10,COX6A1,COX6B1,COX6C,COX8A,ATP6V0E2,COX17,NDUFA13		Znrf1	0.0192294		Pathway	P00005	Angiogenesis	PantherDB	0.003925	1	0.3199	1	9	150	PIK3C2A,JAG1,PLD1,NOTCH4,WNT7A,PRR5,FRZB,PRKD1,FZD2
Mir682	0.000629081		Pathway	1270127	Respiratory electron transport, ATP synthesis by chemiosmotic coupling, and heat production by uncoupling proteins.	BioSystems: REACTOME	3.696e-06	0.007167	0.002672	0.02177	18	126	ATP5F1E,ATP5ME,ATP5PF,NDUFA1,NDUFA2,NDUFA3,NDUFA5,NDUFA6,NDUFB7,NDUFS6,UQCR11,UQCR10,COX6A1,NDUFAF3,COX6B1,COX6C,COX8A,NDUFA13					Pathway	83113	Basal cell carcinoma	BioSystems: KEGG	0.00541	1	0.4136	1	5	55	BMP2,GLI3,WNT7A,WNT9A,FZD2
Mkks	0.0564572		Pathway	83098	Parkinson's disease	BioSystems: KEGG	5.363e-06	0.0104	0.002672	0.02177	19	142	LRRK2,ATP5F1E,ATP5PF,NDUFA1,NDUFA2,NDUFA3,NDUFA5,NDUFA6,NDUFB7,NDUFS6,UQCR11,UQCR10,UBB,COX6A1,COX6B1,COX6C,COX8A,UBE2J2,NDUFA13					Pathway	M6682	CDK Regulation of DNA Replication	MSigDB C2 BIOCARTA (v6.0)	0.005639	1	0.4136	1	3	18	ORC6,MCM5,MCM7
Mlst8	0.0846813		Pathway	1268695	Cooperation of Prefoldin and TriC/CCT in actin and tubulin folding	BioSystems: REACTOME	6.449e-06	0.0125	0.002672	0.02177	9	34	TUBA1B,TUBB3,TUBB4A,TUBB4B,TUBA8,PFDN1,PFDN2,TUBA4A,TUBB2A					Pathway	545323	urate biosynthesis/inosine 5'-phosphate degradation	BioSystems: BIOCYC	0.006027	1	0.4211	1	2	6	NT5E,NT5C2
Mme	0.0119961		Pathway	1270121	The citric acid (TCA) cycle and respiratory electron transport	BioSystems: REACTOME	6.891e-06	0.01336	0.002672	0.02177	21	171	L2HGDH,ATP5F1E,ATP5ME,ATP5PF,NDUFA1,NDUFA2,NDUFA3,NDUFA5,NDUFA6,NDUFB7,NDUFS6,UQCR11,HAGH,PDK1,UQCR10,COX6A1,NDUFAF3,COX6B1,COX6C,COX8A,NDUFA13					Pathway	1269544	GPCR ligand binding	BioSystems: REACTOME	0.006369	1	0.4247	1	18	455	MC2R,NTSR2,SSTR2,CHRM3,NMBR,NPY,HTR1A,WNT7A,WNT9A,GABBR2,GRM2,S1PR1,CRHBP,CRHR1,EDNRA,CCKBR,FZD2,CX3CR1
Mmrn2	0.0939364		Pathway	1270128	Respiratory electron transport	BioSystems: REACTOME	1.876e-05	0.03637	0.006061	0.04938	15	103	NDUFA1,NDUFA2,NDUFA3,NDUFA5,NDUFA6,NDUFB7,NDUFS6,UQCR11,UQCR10,COX6A1,NDUFAF3,COX6B1,COX6C,COX8A,NDUFA13					Pathway	P00018	EGF receptor signaling pathway	PantherDB	0.008101	1	0.4697	1	7	111	SPRY3,ERBB3,PIK3C2A,RASA4,PRKD1,MAP2K6,GAB1
Mnf1	0.0791583		Pathway	1268700	Post-chaperonin tubulin folding pathway	BioSystems: REACTOME	2.602e-05	0.05045	0.007207	0.05872	7	23	TUBA1B,TUBB3,TUBB4A,TUBB4B,TUBA8,TUBA4A,TUBB2A					Pathway	1269767	Cyclin D associated events in G1	BioSystems: REACTOME	0.008275	1	0.4697	1	4	39	CDKN1A,CCND1,E2F5,PPP2R1B
Mogs	0.0592207		Pathway	1268697	Formation of tubulin folding intermediates by CCT/TriC	BioSystems: REACTOME	6.271e-05	0.1216	0.0152	0.1238	7	26	TUBA1B,TUBB3,TUBB4A,TUBB4B,TUBA8,TUBA4A,TUBB2A					Pathway	1269766	G1 Phase	BioSystems: REACTOME	0.008275	1	0.4697	1	4	39	CDKN1A,CCND1,E2F5,PPP2R1B
Mpdz	0.0814652		Pathway	83097	Alzheimer's disease	BioSystems: KEGG	7.588e-05	0.1471	0.01635	0.1332	19	171	MME,ATP5F1E,ATP5PF,NDUFA1,NDUFA2,NDUFA3,NDUFA5,NDUFA6,NDUFB7,NDUFS6,GNAQ,UQCR11,UQCR10,COX6A1,COX6B1,COX6C,COX8A,NDUFA13,APH1A					Pathway	1269940	Transport of nucleosides and free purine and pyrimidine bases across the plasma membrane	BioSystems: REACTOME	0.008324	1	0.4697	1	2	7	SLC29A3,SLC29A2
Mphosph10	0.0739191		Pathway	1269120	Viral mRNA Translation	BioSystems: REACTOME	0.0001033	0.2002	0.01929	0.1572	13	93	RPL32,RPL36AL,RPL38,RPL39,RPL41,RPLP1,RPS2,RPS11,RPS15,RPS21,RPS25,DNAJC3,RPL19					Pathway	782000	Proteoglycans in cancer	BioSystems: KEGG	0.009539	1	0.5183	1	10	203	CDKN1A,ERBB3,CCND1,SDC4,WNT7A,WNT9A,IGF1R,FZD2,GAB1,PLCE1
Mpp7	0.024643		Pathway	1269109	Influenza Life Cycle	BioSystems: REACTOME	0.0001094	0.2122	0.01929	0.1572	17	147	RPL32,RPL36AL,RPL38,RPL39,RPL41,RPLP1,RPS2,RPS11,RPS15,RPS21,RPS25,GTF2F1,NUP62,XPO1,DNAJC3,POM121,RPL19
Mroh7	0.0788113		Pathway	1427846	rRNA processing in the nucleus and cytosol	BioSystems: REACTOME	0.0001312	0.2545	0.01994	0.1625	20	193	RPL32,RPL36AL,RPL38,RPL39,RPL41,RPLP1,RPS2,RPS11,RPS15,RPS21,RPS25,NOP10,NOB1,RPP38,UTP6,RIOK3,RPP14,NOC4L,MPHOSPH10,RPL19
Mrpl2	0.0814652		Pathway	1268696	Prefoldin mediated transfer of substrate to CCT/TriC	BioSystems: REACTOME	0.0001337	0.2592	0.01994	0.1625	7	29	TUBB3,TUBB4A,TUBB4B,PFDN1,PFDN2,TUBA4A,TUBB2A
Mrpl50	0.0756484		Pathway	1383086	Major pathway of rRNA processing in the nucleolus and cytosol	BioSystems: REACTOME	0.0001622	0.3145	0.02172	0.177	19	181	RPL32,RPL36AL,RPL38,RPL39,RPL41,RPLP1,RPS2,RPS11,RPS15,RPS21,RPS25,NOB1,RPP38,UTP6,RIOK3,RPP14,NOC4L,MPHOSPH10,RPL19
Mrpl52	0.0353487		Pathway	1269115	Influenza Viral RNA Transcription and Replication	BioSystems: REACTOME	0.000168	0.3258	0.02172	0.177	16	138	RPL32,RPL36AL,RPL38,RPL39,RPL41,RPLP1,RPS2,RPS11,RPS15,RPS21,RPS25,GTF2F1,NUP62,DNAJC3,POM121,RPL19
Mrps18b	0.0619908		Pathway	PW:0000034	oxidative phosphorylation	Pathway Ontology	0.0002343	0.4543	0.02839	0.2313	9	52	ATP5PF,NDUFA2,NDUFA3,NDUFA5,NDUFA6,NDUFB7,NDUFS6,COX6C,COX17
Mrps21	0.0140644		Pathway	1383085	rRNA processing	BioSystems: REACTOME	0.0002596	0.5035	0.02844	0.2317	20	203	RPL32,RPL36AL,RPL38,RPL39,RPL41,RPLP1,RPS2,RPS11,RPS15,RPS21,RPS25,NOP10,NOB1,RPP38,UTP6,RIOK3,RPP14,NOC4L,MPHOSPH10,RPL19
Mrps28	0.0662001		Pathway	1269108	Influenza Infection	BioSystems: REACTOME	0.000264	0.5119	0.02844	0.2317	17	158	RPL32,RPL36AL,RPL38,RPL39,RPL41,RPLP1,RPS2,RPS11,RPS15,RPS21,RPS25,GTF2F1,NUP62,XPO1,DNAJC3,POM121,RPL19
Mt1	0.0319593		Pathway	1268689	SRP-dependent cotranslational protein targeting to membrane	BioSystems: REACTOME	0.0002787	0.5404	0.02844	0.2317	14	116	RPL32,RPL36AL,RPL38,RPL39,RPL41,RPLP1,RPS2,RPS11,RPS15,RPS21,RPS25,SRP14,SSR3,RPL19
Mt2	0.0563404		Pathway	1268691	Peptide chain elongation	BioSystems: REACTOME	0.0004048	0.7849	0.03749	0.3055	12	93	RPL32,RPL36AL,RPL38,RPL39,RPL41,RPLP1,RPS2,RPS11,RPS15,RPS21,RPS25,RPL19
Mt3	0.000275274		Pathway	1269716	Nonsense-Mediated Decay (NMD)	BioSystems: REACTOME	0.0004322	0.8381	0.03749	0.3055	14	121	RPL32,RPL36AL,RPL38,RPL39,RPL41,RPLP1,RPS2,RPS11,RPS15,RPS21,RPS25,EIF4A3,RBM8A,RPL19
Mtmr11	0.0032211		Pathway	1269717	Nonsense Mediated Decay (NMD) enhanced by the Exon Junction Complex (EJC)	BioSystems: REACTOME	0.0004322	0.8381	0.03749	0.3055	14	121	RPL32,RPL36AL,RPL38,RPL39,RPL41,RPLP1,RPS2,RPS11,RPS15,RPS21,RPS25,EIF4A3,RBM8A,RPL19
Mtus1	0.0900094		Pathway	1269959	Glucose metabolism	BioSystems: REACTOME	0.0004489	0.8705	0.03749	0.3055	11	81	GOT2,HK1,PGAM1,PGK1,PHKA1,UBB,UGP2,PPP1R3C,PPP2R1B,SLC25A10,ENO1
Mvd	0.0229516		Pathway	1339146	Complex I biogenesis	BioSystems: REACTOME	0.0004776	0.9261	0.03749	0.3055	9	57	NDUFA1,NDUFA2,NDUFA3,NDUFA5,NDUFA6,NDUFB7,NDUFS6,NDUFAF3,NDUFA13
Myeov2	0.000182777		Pathway	M15109	Glycolysis Pathway	MSigDB C2 BIOCARTA (v6.0)	0.0004834	0.9373	0.03749	0.3055	4	10	HK1,PGAM1,PGK1,ENO1
Myh7b	0.0757075		Pathway	1339149	Selenoamino acid metabolism	BioSystems: REACTOME	0.0005113	0.9914	0.03761	0.3064	14	123	RPL32,RPL36AL,RPL38,RPL39,RPL41,RPLP1,RPS2,RPS11,RPS15,RPS21,RPS25,PAPSS2,CTH,RPL19
Myo1d	0.0176169		Pathway	1269957	Metabolism of carbohydrates	BioSystems: REACTOME	0.0005396	1	0.03761	0.3064	25	297	SDC4,NDST2,SLC5A3,HYAL2,XYLT1,GOT2,PAPSS2,B4GALT7,HK1,NUP62,PGAM1,PGK1,B4GALT5,PHKA1,UBB,UGP2,PPP1R3C,PPP2R1B,SLC25A10,SLC35B2,POM121,XYLB,DSEL,ENO1,RPE
Mzt1	0.063202		Pathway	1339156	Selenocysteine synthesis	BioSystems: REACTOME	0.0005431	1	0.03761	0.3064	12	96	RPL32,RPL36AL,RPL38,RPL39,RPL41,RPLP1,RPS2,RPS11,RPS15,RPS21,RPS25,RPL19
Nadkd1	0.00261608		Pathway	1268692	Eukaryotic Translation Termination	BioSystems: REACTOME	0.0005973	1	0.03993	0.3254	12	97	RPL32,RPL36AL,RPL38,RPL39,RPL41,RPLP1,RPS2,RPS11,RPS15,RPS21,RPS25,RPL19
Ncln	0.0769385		Pathway	1268690	Eukaryotic Translation Elongation	BioSystems: REACTOME	0.0006559	1	0.04239	0.3454	12	98	RPL32,RPL36AL,RPL38,RPL39,RPL41,RPLP1,RPS2,RPS11,RPS15,RPS21,RPS25,RPL19
Ndst2	0.0898927		Pathway	1269718	Nonsense Mediated Decay (NMD) independent of the Exon Junction Complex (EJC)	BioSystems: REACTOME	0.0007876	1	0.04898	0.3991	12	100	RPL32,RPL36AL,RPL38,RPL39,RPL41,RPLP1,RPS2,RPS11,RPS15,RPS21,RPS25,RPL19
Ndufa1	0.000206893		Pathway	1383043	COPI-independent Golgi-to-ER retrograde traffic	BioSystems: REACTOME	0.0008084	1	0.04898	0.3991	6	28	DCTN2,DYNLL1,GALNT1,PAFAH1B3,DYNC1H1,DYNC1I1
Ndufa13	0.0771327		Pathway	83100	Huntington's disease	BioSystems: KEGG	0.0009925	1	0.05764	0.4696	18	193	DCTN2,ATP5F1E,ATP5PF,NDUFA1,NDUFA2,NDUFA3,NDUFA5,NDUFA6,NDUFB7,NDUFS6,GNAQ,UQCR11,UQCR10,COX6A1,COX6B1,COX6C,COX8A,NDUFA13
Ndufa2	0.000141449		Pathway	373900	Synaptic vesicle cycle	BioSystems: KEGG	0.001011	1	0.05764	0.4696	9	63	STX1B,UNC13A,ATP6V1G2,STX1A,ATP6V1F,ATP6V0E2,SLC17A7,DNM1,UNC13C
Ndufa3	0.00587948		Pathway	P00024	Glycolysis	PantherDB	0.001253	1	0.06941	0.5655	3	6	HK1,PGK1,ENO1
Ndufa5	0.0807361		Pathway	1268681	Formation of a pool of free 40S subunits	BioSystems: REACTOME	0.001435	1	0.07727	0.6296	12	107	RPL32,RPL36AL,RPL38,RPL39,RPL41,RPLP1,RPS2,RPS11,RPS15,RPS21,RPS25,RPL19
Ndufa6	0.0757075		Pathway	1269910	Sodium/Calcium exchangers	BioSystems: REACTOME	0.001492	1	0.07816	0.6368	4	13	SLC24A3,SLC8A2,SRI,SLC24A5
Ndufaf3	0.00445393		Pathway	1269056	Infectious disease	BioSystems: REACTOME	0.00165	1	0.08421	0.6861	29	393	RPL32,RPL36AL,RPL38,RPL39,RPL41,RPLP1,RPS2,RPS11,RPS15,RPS21,RPS25,STX1B,SH3GL3,PACS1,RNGTT,STX1A,ELOC,ELOB,GTF2F1,GUCY2C,NUP62,UBB,XPO1,MAP2K3,DNAJC3,PSMA7,POM121,PSMB11,RPL19
Ndufb7	0.0403426		Pathway	83103	Pathogenic Escherichia coli infection	BioSystems: KEGG	0.001695	1	0.08429	0.6868	8	55	ACTG1,TUBA1B,TUBB3,TUBB4A,TUBB4B,TUBA8,TUBA4A,TUBB2A
Ndufs6	0.033848		Pathway	P00016	Cytoskeletal regulation by Rho GTPase	PantherDB	0.001948	1	0.09442	0.7692	9	69	ACTA1,ACTG1,TUBB3,TUBB4A,TUBB4B,MYH7B,CFL2,TUBB2A,STMN4
Nek7	0.0339758		Pathway	P05734	Synaptic vesicle trafficking	PantherDB	0.002079	1	0.09814	0.7996	5	23	STX1B,STX1A,SYN1,SYP,UNC13C
Nell1	0.0897328		Pathway	664436	Nucleotide sugar biosynthesis, glucose => UDP-glucose	BioSystems: KEGG	0.002126	1	0.09814	0.7996	3	7	HKDC1,HK1,UGP2
Nell2	0.0882088		Pathway	1268694	Chaperonin-mediated protein folding	BioSystems: REACTOME	0.002408	1	0.1086	0.8847	11	99	TUBA1B,TUBB3,TUBB4A,TUBB4B,TUBA8,GNG12,GNG3,PFDN1,PFDN2,TUBA4A,TUBB2A
Neu2	0.0814652		Pathway	413340	Glycolysis (Embden-Meyerhof pathway), glucose => pyruvate	BioSystems: KEGG	0.003068	1	0.1352	1	5	25	HKDC1,HK1,PGAM1,PGK1,ENO1
Ngfrap1	0.0387834		Pathway	862188	Non-alcoholic fatty liver disease (NAFLD)	BioSystems: KEGG	0.003265	1	0.1407	1	14	149	NDUFA1,NDUFA2,NDUFA3,NDUFA5,NDUFA6,NDUFB7,NDUFS6,UQCR11,UQCR10,COX6A1,COX6B1,COX6C,COX8A,NDUFA13
Nkain1	0.090601		Pathway	1268688	L13a-mediated translational silencing of Ceruloplasmin expression	BioSystems: REACTOME	0.003529	1	0.1456	1	12	119	RPL32,RPL36AL,RPL38,RPL39,RPL41,RPLP1,RPS2,RPS11,RPS15,RPS21,RPS25,RPL19
Nob1	0.0325982		Pathway	1268686	GTP hydrolysis and joining of the 60S ribosomal subunit	BioSystems: REACTOME	0.003529	1	0.1456	1	12	119	RPL32,RPL36AL,RPL38,RPL39,RPL41,RPLP1,RPS2,RPS11,RPS15,RPS21,RPS25,RPL19
Noc4l	0.00588071		Pathway	1268693	Protein folding	BioSystems: REACTOME	0.003821	1	0.1544	1	11	105	TUBA1B,TUBB3,TUBB4A,TUBB4B,TUBA8,GNG12,GNG3,PFDN1,PFDN2,TUBA4A,TUBB2A
Nop10	0.0627194		Pathway	83036	Ribosome	BioSystems: KEGG	0.004397	1	0.17	1	14	154	RPL32,RPL36AL,RPL38,RPL39,RPL41,RPLP1,RPS2,RPS11,RPS15,RPS21,RPS25,MRPS21,MRPL2,RPL19
Npdc1	0.0992954		Pathway	1268768	Neurotransmitter Release Cycle	BioSystems: REACTOME	0.004552	1	0.17	1	7	51	LIN7C,LIN7B,STX1A,SYN1,SLC5A7,SLC38A2,SLC17A7
Nphp4	0.0717683		Pathway	P00015	Circadian clock system	PantherDB	0.004797	1	0.17	1	3	9	PER3,PER2,CRY1
Nphs2	0.00677379		Pathway	1270158	Metabolism of amino acids and derivatives	BioSystems: REACTOME	0.004834	1	0.17	1	26	367	RPL32,RPL36AL,RPL38,RPL39,RPL41,RPLP1,RPS2,RPS11,RPS15,RPS21,RPS25,FOLH1,OAZ3,GPT2,GOT2,PAPSS2,CKMT1B,SLC25A10,CTH,PSMA7,DBT,DIO2,PSMB11,AASS,SLC25A15,RPL19
Npy	0.00101548		Pathway	PW:0000074	lysine biosynthetic	Pathway Ontology	0.00491	1	0.17	1	2	3	CROT,AASS
Npy2r	0.000813534		Pathway	1270201	FMO oxidises nucleophiles	BioSystems: REACTOME	0.00491	1	0.17	1	2	3	FMO1,FMO2
Nr1d1	0.0209841		Pathway	1269150	Toxicity of botulinum toxin type C (BoNT/C)	BioSystems: REACTOME	0.00491	1	0.17	1	2	3	STX1B,STX1A
Nrp1	0.0814652		Pathway	1270209	Formation of the active cofactor, UDP-glucuronate	BioSystems: REACTOME	0.00491	1	0.17	1	2	3	UGDH,UGP2
Nt5c2	0.0825058		Pathway	1268680	Cap-dependent Translation Initiation	BioSystems: REACTOME	0.00596	1	0.1992	1	12	127	RPL32,RPL36AL,RPL38,RPL39,RPL41,RPLP1,RPS2,RPS11,RPS15,RPS21,RPS25,RPL19
Nt5dc2	0.0290018		Pathway	1268679	Eukaryotic Translation Initiation	BioSystems: REACTOME	0.00596	1	0.1992	1	12	127	RPL32,RPL36AL,RPL38,RPL39,RPL41,RPLP1,RPS2,RPS11,RPS15,RPS21,RPS25,RPL19
Ntng2	0.0941937		Pathway	1269907	SLC-mediated transmembrane transport	BioSystems: REACTOME	0.007553	1	0.2479	1	21	287	SLC24A3,SLC5A3,SLC8A2,SRI,SLCO1C1,SLC38A3,SLC7A8,SLC2A6,SLC24A5,HK1,SLC5A7,NUP62,SLC29A2,SLC38A2,SLC2A8,SLC25A10,SLC35B2,SLC30A3,HEPH,POM121,SLC17A7
Ntsr1	0.00175056		Pathway	1268847	Anchoring of the basal body to the plasma membrane	BioSystems: REACTOME	0.007872	1	0.2479	1	10	100	CEP76,TUBB4A,TUBB4B,DCTN2,DYNLL1,TMEM67,TUBA4A,AHI1,NPHP4,DYNC1H1
Nudcd2	0.064907		Pathway	1268821	Potassium Channels	BioSystems: REACTOME	0.007872	1	0.2479	1	10	100	GNG12,ABCC8,GNG3,KCNH4,GABBR2,KCNK4,KCND1,KCNH1,KCNN2,HCN4
Nudt12	0.0739191		Pathway	1268678	Translation	BioSystems: REACTOME	0.008015	1	0.2479	1	14	165	RPL32,RPL36AL,RPL38,RPL39,RPL41,RPLP1,RPS2,RPS11,RPS15,RPS21,RPS25,SRP14,SSR3,RPL19
Nudt16l1	0.0754845		Pathway	1269367	Platelet degranulation	BioSystems: REACTOME	0.008053	1	0.2479	1	12	132	TEX264,SELENOP,CDC37L1,CHID1,PDGFB,TUBA4A,PLEK,TMX3,HSPA5,PHACTR2,ISLR,RAB27B
Nudt21	0.00551436		Pathway	1269655	TP53 Regulates Metabolic Genes	BioSystems: REACTOME	0.008574	1	0.2525	1	9	86	LAMTOR2,LAMTOR4,MLST8,COX6A1,COX6B1,COX6C,COX8A,YWHAH,SESN2
Nup62	0.0696817		Pathway	MAP00190_Oxidative_phosphorylation	MAP00190 Oxidative phosphorylation	GenMAPP	0.008708	1	0.2525	1	6	44	ATP5F1E,ATP6V1G2,NDUFA5,ATP6V1F,COX6A1,COX6C
Nus1	0.0957292		Pathway	1339158	Metallothioneins bind metals	BioSystems: REACTOME	0.008863	1	0.2525	1	3	11	MT1A,MT2A,MT3
Nxt2	0.0639647		Pathway	1339157	Response to metal ions	BioSystems: REACTOME	0.008863	1	0.2525	1	3	11	MT1A,MT2A,MT3
Oaz3	0.00710319		Pathway	1269961	Gluconeogenesis	BioSystems: REACTOME	0.009188	1	0.2525	1	5	32	GOT2,PGAM1,PGK1,SLC25A10,ENO1
Ocrl	0.0992954		Pathway	1269960	Glycolysis	BioSystems: REACTOME	0.009188	1	0.2525	1	5	32	HK1,PGAM1,PGK1,PPP2R1B,ENO1
Odf3	0.0424215		Pathway	545361	thyroid hormone metabolism II (via conjugation and/or degradation)	BioSystems: BIOCYC	0.009547	1	0.2525	1	2	4	SULT1A1,DIO2
Olfm1	0.0696563		Pathway	PW:0000640	glycolysis pathway	Pathway Ontology	0.009623	1	0.2525	1	4	21	HK1,PGAM1,PGK1,ENO1
Olfm3	0.090507		Pathway	SMP00023	Steroid Biosynthesis	SMPDB	0.009623	1	0.2525	1	4	21	FDFT1,MVD,GGPS1,DHCR24
Olfr332	0.0619908		Pathway	83072	Gap junction	BioSystems: KEGG	0.009917	1	0.2525	1	9	88	TUBA1B,TUBB3,TUBB4A,TUBB4B,TUBA8,GNAQ,PDGFB,TUBA4A,TUBB2A
Oprm1	0.0275728
Orai2	0.0222739
Ost4	0.0569138
Otud6b	0.0809012
P2rx4	0.0500099
P4ha1	0.000316212
P4htm	0.0763474
Pacs1	0.0509529
Pafah1b3	0.0769385
Pamr1	0.0157259
Papola	0.0458239
Papss2	0.0748918
Paqr8	0.00763456
Pbx3	0.0783716
Pcdhgc4	0.0434981
Pcdhgc5	0.00363442
Pcp4	0.0814652
Pcsk1	0.0788113
Pcsk9	0.0177102
Pde7b	0.0305396
Pde8b	0.0911091
Pdgfb	0.0992954
Pdia3	0.00716962
Pdia4	0.0340182
Pdk1	0.0893949
Peg10	0.040646
Per2	0.0499053
Per3	0.0982952
Pfdn1	0.0972829
Pfdn2	0.0900094
Pgam1	0.0100813
Pgk1	0.0156637
Phactr2	0.0934505
Phf13	0.078256
Phka1	0.0213724
Pias4	0.0980877
Piezo1	0.0982952
Pigz	0.00363442
Pih1d1	0.060426
Plce1	0.00303959
Plcl1	0.0903711
Plek	0.0825058
Plekha3	0.00936332
Plekhg5	0.0893949
Plekho2	0.0679656
Plin4	6.52945e-07
Pllp	0.016939
Plxdc1	0.0757075
Pmepa1	0.0948147
Poglut1	0.0199512
Pom121	0.0630565
Pomgnt1	0.0903711
Ppid	0.0156637
Ppp1r3c	0.0884049
Ppp2r1b	0.0884049
Ppp2r5c	0.0211456
Pptc7	0.0630565
Pqlc2	0.0884049
Pramel6	0.0463289
Prom1	0.0167383
Prrt2	0.0466999
Prss12	0.0229709
Psma7	0.0704689
Psmb11	0.0671073
Psrc1	0.0671073
Ptchd1	0.0825058
Ptges3	0.0757075
Ptgr2	0.0931725
Ptma	0.0122811
Ptp4a2	0.0846813
Ptp4a3	0.0814652
Ptprs	0.078256
Ptrh2	0.0500099
R3hcc1l	0.0884049
Rab21	0.0897328
Rab27b	0.0679485
Rab28	0.060462
Rab33a	0.0176169
Rac3	0.0563404
Ramp3	0.0814652
Rarb	0.0836757
Rasgef1c	0.0160718
Rasl11b	0.000206893
Rassf3	0.0455046
Rbl2	0.0136256
Rbm8a	0.0231059
Rcan2	0.0799804
Reep2	0.0829872
Reep6	0.0589863
Rfk	0.078256
Rhbdl1	0.0483671
Rhov	0.0448507
Rimbp2	0.0344133
Riok3	0.081951
Ripk1	0.0814652
Ripk2	0.00682053
Rnaseh2c	0.0781979
Rnasek	0.0474883
Rnd3	0.0101032
Rnf112	0.0679656
Rnf19b	0.0982952
Rnf26	0.0474995
Rnf43	0.0323343
Rngtt	0.0627194
Romo1	0.00363442
Rpe	0.0206964
Rpf1	0.049865
Rpl19	0.0283219
Rpl32	0.0101209
Rpl36al	0.0639647
Rpl38	3.16297e-06
Rpl39	0.0222739
Rpl41	0.000118915
Rplp1	0.0825058
Rpp14	0.0814652
Rpp38	0.0954945
Rps11	0.0502754
Rps15	0.025325
Rps2	0.0325982
Rps21	7.68775e-05
Rps25	0.0306653
Rps6kl1	0.0873357
Rrp12	0.0766934
Rspry1	0.0833488
Rtn4r	0.0173233
Rusc1	0.0814652
Rwdd4a	0.0455046
S100a1	0.0567351
S1pr3	0.0884049
Sap130	0.0838551
Scamp4	0.00363442
Scn9a	0.0679656
Scube1	0.00216751
Sdc4	0.0340182
Sel1l3	0.0500099
Sema4a	0.0395493
Sepp1	0.0431429
Serp1	0.0757075
Sesn2	0.0807361
Sez6	0.0275728
Sh3bgrl3	0.0696817
Sh3bp5	0.0939364
Sh3gl3	0.0814652
Shisa5	0.0814652
Sigmar1	0.0188931
Slc17a7	0.0275728
Slc22a23	0.0554117
Slc24a3	0.0783716
Slc24a5	0.0963279
Slc25a10	0.0618024
Slc25a15	0.0541111
Slc29a2	0.0609833
Slc2a6	0.0814652
Slc2a8	0.0534929
Slc30a3	0.060426
Slc35a5	0.0467323
Slc35b2	0.0630565
Slc38a2	0.00659573
Slc38a3	0.0835315
Slc52a2	0.0982728
Slc5a3	0.00363442
Slc5a7	0.0788113
Slc7a8	0.021913
Slc8a2	0.0756024
Slco1c1	0.00587948
Smcr7	0.0671073
Smim12	0.0176169
Sncb	0.0836757
Snn	0.0814652
Snx27	0.0897328
Sorbs1	0.00793639
Sowaha	0.0515832
Sowahc	0.0982728
Spg7	0.0817266
Spire1	0.0424215
Spred1	0.0188954
Sprn	0.0681421
Spry3	4.96103e-05
Sptssa	0.0717683
Sri	0.0924776
Srp14	0.0982952
Srsf10	0.0788113
Ssr3	0.0893949
Sst	0.0893949
Sstr2	0.00319197
St6galnac3	0.0836757
St7	0.0917791
Stk38	0.0756342
Stmn4	0.096846
Stoml1	0.0788113
Stt3b	0.0879637
Stx1a	0.0860651
Stx1b	0.0962938
Stxbp4	0.0970894
Sugp1	0.0917791
Sult1a1	0.0814652
Susd2	0.095358
Svip	0.0542548
Sycp3	0.0913722
Syn1	0.0757075
Synpo2	0.0032211
Syp	0.0705004
Syt4	0.0814652
Tacr3	0.0627194
Taf5l	0.0942365
Taf8	0.0893949
Tango6	0.0705004
Tank	0.0696563
Tceal3	0.00247271
Tceal5	0.000335714
Tceal6	0.000251175
Tceb1	0.080348
Tceb2	0.0893949
Tex264	0.0836757
Tfpt	0.0369122
Thy1	0.0229709
Ticam1	0.0353487
Tifa	0.0636456
Timm13	0.0527802
Timm8b	0.000815987
Tm6sf2	0.0241439
Tmem11	0.0893949
Tmem132d	0.0884049
Tmem141	0.0466999
Tmem151a	0.0879586
Tmem163	0.0511897
Tmem167b	0.0606622
Tmem179	0.0814652
Tmem184b	0.00677379
Tmem223	0.0323343
Tmem255a	0.0244756
Tmem256	0.00175056
Tmem258	0.0846813
Tmem44	0.0783716
Tmem59l	0.0178419
Tmem67	0.0627194
Tmem86a	0.0106203
Tmem88b	0.0325982
Tmem97	0.0954945
Tmod1	0.0527802
Tmx3	0.0846813
Tnnc1	0.00489954
Tomm5	0.0339758
Tomm7	0.000511396
Tor2a	0.0497804
Tprkb	0.0329478
Tra2a	0.0306653
Tradd	0.0814652
Trappc13	0.0500099
Trib2	0.0226186
Trim11	0.0569287
Trim3	0.0836757
Trim7	0.0555184
Trpm4	0.0983756
Tsc22d3	0.0769385
Tspan11	0.0306653
Tspan12	0.080348
Tspan9	0.0771327
Ttc23	0.0846813
Tuba1b	1.64569e-05
Tuba4a	0.090507
Tuba8	0.0474995
Tubb2a	0.00291236
Tubb3	0.0960188
Tubb4a	0.00630081
Tubb4b	0.0900094
Tubd1	0.0630565
Tubgcp2	0.0897328
Twf1	0.068473
Ubald1	0.0941937
Ubb	0.0167745
Ube2a	0.0939364
Ube2b	0.063811
Ube2j2	0.00551436
Ube2q2	0.0942365
Ube2v1	0.0325982
Ubl5	0.017092
Ubxn2b	0.0884049
Ugdh	0.0188954
Ugp2	0.0717683
Uhrf2	0.095634
Unc13a	0.0220718
Unc13c	0.0900094
Uqcr10	0.0109892
Uqcr11	0.00649191
Usmg5	0.000958732
Usp27x	0.0339758
Usp40	0.0814652
Usp43	0.0286864
Usp53	0.0807361
Utp6	0.0606622
Vezf1	0.0724647
Vmn2r84	0.0653975
Vps26a	0.0653975
Wasf1	0.0502754
Wbp4	0.0531511
Wbscr27	0.0474883
Wdr34	0.0884049
Wdr54	0.0167745
Wdr81	0.0783716
Wdr83	0.0564572
Wnt4	0.0994136
Wnt9a	0.0237178
Xpo1	0.0325982
Xylb	0.0224716
Xylt1	0.0576885
Ywhah	0.00363442
Zbtb12	0.095634
Zbtb22	0.0396102
Zdbf2	0.0636456
Zdhhc22	0.00682053
Zdhhc8	0.00489954
Zfand2b	0.0398354
Zfp191	0.0290018
Zfp324	0.0814652
Zfp341	0.0814652
Zfp414	0.0893949
Zfp426	0.0856406
Zfp46	0.0757075
Zfp553	0.0893949
Zfp791	0.00849868
Zfp82	0.0954945
Zfp870	0.0606622
Zfp958	0.0884049
Zfyve28	0.00587948
Zhx1	0.0783716
Znrf2	0.0948147
Zscan29	0.0630565
Zxdb	0.0936907
