# Supplementary material for: Ethanol-Induced Behavioral Sensitization Alters the Synaptic Transcriptome and Exon Utilization in DBA/2J Mice
Source: Front Genet. 2018 Sep 24;9:402. doi: 10.3389/fgene.2018.00402 (PMC6166094; doi:10.3389/fgene.2018.00402)
Supplement: TABLE S9 — DEXSeq differential exon usage results (unfiltered data). [file Table_9.xlsx]

## Sheet: Supplemental Table S9
Supplemental Table S9: DEXSeq Differential Exon Usage Results (Unfiltered Data)
Ensembl_ID	Exon_bin	Gene_symbol	logFoldChange_SSP_SSS	padj_SSP_SSS	logFoldChange_SES_SSS	padj_SES_SSS	logFoldChange_EES_SSS	padj_EES_SSS	logFoldChange_SEP_SSP	padj_SEP_SSP	logFoldChange_EEP_SSP	padj_EEP_SSP
ENSMUSG00000000001	E001	Gnai3	-0.259891	7.32312e-32	-0.00863322	0.999962	-0.130031	2.00994e-05	0.0434392	0.499696	0.0468902	0.446204
ENSMUSG00000000001	E002	Gnai3	-0.124221	0.00459787	0.0194787	0.999962	-0.0977329	0.133314	0.0436321	0.78776	0.0835256	0.272409
ENSMUSG00000000001	E003	Gnai3	0.031781	0.501715			0.0650744	0.273376	0.0100587	0.987569	0.0249926	0.862793
ENSMUSG00000000001	E004	Gnai3	0.0652986	0.363894			0.0508546	0.367808	-0.0101844	0.989715	-0.000392316	0.973792
ENSMUSG00000000001	E005	Gnai3	0.133647	0.00225314			0.0292689	0.73204	-0.0247595	0.869857	0.0424042	0.6853
ENSMUSG00000000001	E006	Gnai3	0.202667	1.41643e-08			0.100857	0.0288674	-0.0413453	0.661351	-0.0328891	0.680093
ENSMUSG00000000001	E007	Gnai3	0.191545	9.18276e-05			0.0812049	0.310643	-0.0202748	0.916317	-0.137458	0.148426
ENSMUSG00000000001	E008	Gnai3	0.185116	0.0108669			0.109488	0.252157			-0.245766	0.114907
ENSMUSG00000000001	E009	Gnai3	0.279616	0.00112672			0.125974	0.0981827	-0.0733397	0.868806	-0.0730704	0.797466
ENSMUSG00000000003	E001	Pbsn
ENSMUSG00000000003	E002	Pbsn
ENSMUSG00000000003	E003	Pbsn
ENSMUSG00000000003	E004	Pbsn
ENSMUSG00000000003	E005	Pbsn
ENSMUSG00000000003	E006	Pbsn
ENSMUSG00000000003	E007	Pbsn
ENSMUSG00000000003	E008	Pbsn
ENSMUSG00000000003	E009	Pbsn
ENSMUSG00000000028	E001	Cdc45
ENSMUSG00000000028	E002	Cdc45
ENSMUSG00000000028	E003	Cdc45
ENSMUSG00000000028	E004	Cdc45
ENSMUSG00000000028	E005	Cdc45
ENSMUSG00000000028	E006	Cdc45	0.174899	0.79514
ENSMUSG00000000028	E007	Cdc45	-0.173884	0.70668
ENSMUSG00000000028	E008	Cdc45	-0.340946	0.291736
ENSMUSG00000000028	E009	Cdc45	-0.0317713	0.92742
ENSMUSG00000000028	E010	Cdc45	-0.0976366	0.725325
ENSMUSG00000000028	E011	Cdc45	-0.133459	0.615531
ENSMUSG00000000028	E012	Cdc45	-0.178335	0.501755
ENSMUSG00000000028	E013	Cdc45	0.103485	0.797763
ENSMUSG00000000028	E014	Cdc45	-0.0383199	0.888874
ENSMUSG00000000028	E015	Cdc45	0.120984	0.764275
ENSMUSG00000000028	E016	Cdc45	-0.216447	0.390977
ENSMUSG00000000028	E017	Cdc45	0.0822708	0.87053
ENSMUSG00000000028	E018	Cdc45	0.0626959	0.889686
ENSMUSG00000000028	E019	Cdc45	0.386904	0.381278
ENSMUSG00000000028	E020	Cdc45	0.195112	0.688249
ENSMUSG00000000028	E021	Cdc45	0.0924442	0.85399
ENSMUSG00000000028	E022	Cdc45	0.906174	0.0711324
ENSMUSG00000000028	E023	Cdc45	0.698121	0.454149
ENSMUSG00000000028	E024	Cdc45
ENSMUSG00000000028	E025	Cdc45
ENSMUSG00000000031	E001	H19
ENSMUSG00000000031	E002	H19
ENSMUSG00000000031	E003	H19
ENSMUSG00000000031	E004	H19
ENSMUSG00000000031	E005	H19
ENSMUSG00000000031	E006	H19
ENSMUSG00000000031	E007	H19
ENSMUSG00000000031	E008	H19
ENSMUSG00000000031	E009	H19
ENSMUSG00000000031	E010	H19
ENSMUSG00000000031	E011	H19
ENSMUSG00000000031	E012	H19
ENSMUSG00000000031	E013	H19
ENSMUSG00000000031	E014	H19
ENSMUSG00000000031	E015	H19
ENSMUSG00000000031	E016	H19
ENSMUSG00000000031	E017	H19
ENSMUSG00000000031	E018	H19
ENSMUSG00000000031	E019	H19
ENSMUSG00000000037	E001	Scml2
ENSMUSG00000000037	E002	Scml2
ENSMUSG00000000037	E003	Scml2
ENSMUSG00000000037	E004	Scml2
ENSMUSG00000000037	E005	Scml2
ENSMUSG00000000037	E006	Scml2
ENSMUSG00000000037	E007	Scml2
ENSMUSG00000000037	E008	Scml2
ENSMUSG00000000037	E009	Scml2
ENSMUSG00000000037	E010	Scml2
ENSMUSG00000000037	E011	Scml2	0.300911	0.957567
ENSMUSG00000000037	E012	Scml2
ENSMUSG00000000037	E013	Scml2	-0.0400148	0.629219
ENSMUSG00000000037	E014	Scml2
ENSMUSG00000000037	E015	Scml2
ENSMUSG00000000037	E016	Scml2
ENSMUSG00000000037	E017	Scml2
ENSMUSG00000000037	E018	Scml2
ENSMUSG00000000037	E019	Scml2
ENSMUSG00000000037	E020	Scml2
ENSMUSG00000000037	E021	Scml2
ENSMUSG00000000037	E022	Scml2
ENSMUSG00000000037	E023	Scml2
ENSMUSG00000000037	E024	Scml2
ENSMUSG00000000037	E025	Scml2
ENSMUSG00000000037	E026	Scml2
ENSMUSG00000000037	E027	Scml2
ENSMUSG00000000037	E028	Scml2
ENSMUSG00000000037	E029	Scml2
ENSMUSG00000000037	E030	Scml2
ENSMUSG00000000037	E031	Scml2
ENSMUSG00000000037	E032	Scml2
ENSMUSG00000000037	E033	Scml2	-0.0261392	0.721622
ENSMUSG00000000037	E034	Scml2	-0.284057	0.419227
ENSMUSG00000000037	E035	Scml2
ENSMUSG00000000037	E036	Scml2
ENSMUSG00000000037	E037	Scml2
ENSMUSG00000000037	E038	Scml2
ENSMUSG00000000037	E039	Scml2
ENSMUSG00000000037	E040	Scml2	0.00447173	0.670147
ENSMUSG00000000037	E041	Scml2
ENSMUSG00000000049	E001	Apoh
ENSMUSG00000000049	E002	Apoh
ENSMUSG00000000049	E003	Apoh
ENSMUSG00000000049	E004	Apoh
ENSMUSG00000000049	E005	Apoh
ENSMUSG00000000049	E006	Apoh
ENSMUSG00000000049	E007	Apoh
ENSMUSG00000000049	E008	Apoh
ENSMUSG00000000049	E009	Apoh
ENSMUSG00000000049	E010	Apoh
ENSMUSG00000000049	E011	Apoh
ENSMUSG00000000049	E012	Apoh
ENSMUSG00000000049	E013	Apoh
ENSMUSG00000000049	E014	Apoh
ENSMUSG00000000049	E015	Apoh
ENSMUSG00000000049	E016	Apoh
ENSMUSG00000000056	E001	Narf	0.152523	0.026619			0.0347551	0.867005			0.0221907	0.945123
ENSMUSG00000000056	E002	Narf	0.0955263	0.142936			0.0173052	0.941008			-0.0098375	0.953437
ENSMUSG00000000056	E003	Narf	0.0424829	0.575224			-0.0149924	0.998827	0.046146	0.861025	-0.0756357	0.595331
ENSMUSG00000000056	E004	Narf
ENSMUSG00000000056	E005	Narf	0.0217929	0.694033			0.024604	0.685365	0.0485176	0.821185	0.0263547	0.910278
ENSMUSG00000000056	E006	Narf	0.0894857	0.0695005			0.0347445	0.573443	0.00216774	0.99507	0.0113943	0.972724
ENSMUSG00000000056	E007	Narf	0.0481895	0.448582			0.0318119	0.647771			0.0514986	0.784291
ENSMUSG00000000056	E008	Narf	0.0157899	0.735518			0.0242732	0.670892	-0.00589698	0.977154	0.0952815	0.390946
ENSMUSG00000000056	E009	Narf	0.00297475	0.915369			0.0194404	0.820518
ENSMUSG00000000056	E010	Narf	-0.363065	0.567153
ENSMUSG00000000056	E011	Narf	0.0187313	0.688637	0.0481317	0.999962	0.0402866	0.420383	-0.0412797	0.817714	0.0626096	0.625654
ENSMUSG00000000056	E012	Narf	-0.0168535	0.939725			0.0621967	0.308576			-0.0414996	0.807541
ENSMUSG00000000056	E013	Narf	0.00922836	0.792446	0.0227768	0.999962	0.0201596	0.660146	-0.0491673	0.752787	-0.0784838	0.430968
ENSMUSG00000000056	E014	Narf	0.0071867	0.837425	-0.0390134	0.999962	-0.0601076	0.356135	-0.0815749	0.452177	-0.10015	0.38325
ENSMUSG00000000056	E015	Narf	-0.0936164	2.37702e-05	-0.01224	0.999962	-0.0608736	0.0939491	0.0352464	0.712558	0.0106551	0.953244
ENSMUSG00000000058	E001	Cav2	0.127049	0.171162			-0.0246014	0.953077
ENSMUSG00000000058	E002	Cav2	0.178439	0.0321944			0.0998602	0.531598
ENSMUSG00000000058	E003	Cav2	0.118915	0.00867841			0.0839786	0.315742	-0.00902571	0.913946	-0.0836647	0.393831
ENSMUSG00000000058	E004	Cav2	0.0492394	0.00371086			0.024482	0.392849	-0.0146351	0.682739	-0.129254	0.0047089
ENSMUSG00000000058	E005	Cav2
ENSMUSG00000000058	E006	Cav2	-0.0278671	0.108898	-0.000839105	0.999962	-0.0173879	0.884178	-0.00581721	0.585874	0.0407525	0.921147
ENSMUSG00000000058	E007	Cav2	-0.207534	0.000996381	0.00243202	0.999962	-0.0838202	0.356523	0.0641509	0.630325	0.136963	0.129926
ENSMUSG00000000078	E001	Klf6	0.234645	1.2011e-05			0.169822	0.0026369			-0.00345227	0.94363
ENSMUSG00000000078	E002	Klf6	0.103239	1.4869e-08	0.0163316	0.999962	0.0508117	0.0480249	-0.0407791	0.621447	-0.0022898	0.859401
ENSMUSG00000000078	E003	Klf6	0.0273321	0.0789046			-0.0282255	0.951798			-0.0285288	0.693646
ENSMUSG00000000078	E004	Klf6	-0.166731	3.66669e-09	-0.0124442	0.999962	-0.0510313	0.0107523	0.0399028	0.573444	0.0314971	0.852286
ENSMUSG00000000085	E001	Scmh1	-0.085138	0.911305
ENSMUSG00000000085	E002	Scmh1	0.0858959	0.765542
ENSMUSG00000000085	E003	Scmh1	0.0847312	0.75063
ENSMUSG00000000085	E004	Scmh1	0.00354465	0.989155			-0.013793	0.955656
ENSMUSG00000000085	E005	Scmh1	0.0159496	0.979906			0.0555424	0.861908
ENSMUSG00000000085	E006	Scmh1	-0.00466813	0.950534			0.0468666	0.856745
ENSMUSG00000000085	E007	Scmh1	-0.113852	0.455337			-0.104257	0.550821
ENSMUSG00000000085	E008	Scmh1
ENSMUSG00000000085	E009	Scmh1
ENSMUSG00000000085	E010	Scmh1	-0.090031	0.514205			-0.108922	0.585814
ENSMUSG00000000085	E011	Scmh1	-0.0760848	0.701128			-0.0382972	0.949603
ENSMUSG00000000085	E012	Scmh1	-0.204843	0.67819
ENSMUSG00000000085	E013	Scmh1	-0.0225684	0.874973			-0.0381351	0.73102			-0.0306232	0.935632
ENSMUSG00000000085	E014	Scmh1	-0.0471489	0.70679			-0.0944341	0.553462
ENSMUSG00000000085	E015	Scmh1	-0.0185832	0.880275			-0.0531264	0.790666
ENSMUSG00000000085	E016	Scmh1	0.0196394	0.910397			0.0303116	0.85673
ENSMUSG00000000085	E017	Scmh1	-0.00433258	0.993274			-0.0204739	0.959373			0.0840407	0.764159
ENSMUSG00000000085	E018	Scmh1	0.00992117	0.945802			0.0128662	0.913754
ENSMUSG00000000085	E019	Scmh1	-0.0411953	0.520999			-0.0697892	0.499534	0.0239374	0.889477	0.134539	0.105784
ENSMUSG00000000085	E020	Scmh1	-0.0251422	0.823987			-0.0517825	0.660091			0.0119433	0.931408
ENSMUSG00000000085	E021	Scmh1	0.0814006	0.127716			0.00909065	0.927096	0.01423	0.902861	0.0429821	0.586918
ENSMUSG00000000085	E022	Scmh1
ENSMUSG00000000085	E023	Scmh1	0.11077	0.0701617			0.0635137	0.502314	-0.00729473	0.993926	-0.0411526	0.862112
ENSMUSG00000000085	E024	Scmh1	0.120247	0.0397799			0.101232	0.332318	-0.00384519	0.983477	-0.0721969	0.65141
ENSMUSG00000000085	E025	Scmh1	0.151837	0.101088			0.108545	0.300166	-0.0321569	0.942191	-0.0251509	0.965099
ENSMUSG00000000085	E026	Scmh1	0.0668741	0.546382			0.0669511	0.227686	-0.00429718	0.980375	0.021849	0.848325
ENSMUSG00000000085	E027	Scmh1	0.0258493	0.881118			0.0515065	0.487225	0.0286052	0.88673	0.0707765	0.543033
ENSMUSG00000000085	E028	Scmh1
ENSMUSG00000000085	E029	Scmh1
ENSMUSG00000000085	E030	Scmh1	0.0555649	0.439845			0.0753194	0.262195	0.0237048	0.864426	-0.0431133	0.845857
ENSMUSG00000000085	E031	Scmh1	0.0252639	0.824962			0.0147063	0.908912	-0.000575317	0.975811	-0.0925107	0.555442
ENSMUSG00000000085	E032	Scmh1	-0.0442146	0.625436			0.0112994	0.946597			0.0402537	0.78881
ENSMUSG00000000085	E033	Scmh1	0.0367481	0.937253
ENSMUSG00000000085	E034	Scmh1	-0.0659211	0.271375			-0.0691798	0.500102	-0.0141452	0.99181	-0.0216376	0.964388
ENSMUSG00000000085	E035	Scmh1	-0.0962108	0.319951			-0.103811	0.441378
ENSMUSG00000000085	E036	Scmh1	-0.0567368	0.5348			-0.0684022	0.553881
ENSMUSG00000000085	E037	Scmh1	0.00802184	0.977849			0.0198193	0.932803
ENSMUSG00000000085	E038	Scmh1	0.00693463	0.98892			0.0474814	0.841646
ENSMUSG00000000085	E039	Scmh1	-0.0980096	0.112775			-0.0413443	0.723002	-0.0347526	0.923412	-0.0421889	0.858379
ENSMUSG00000000085	E040	Scmh1	-0.335153	0.0615631			-0.190651	0.195228
ENSMUSG00000000085	E041	Scmh1	-0.196127	0.124441			-0.150548	0.420312
ENSMUSG00000000085	E042	Scmh1	-0.134133	0.396867
ENSMUSG00000000085	E043	Scmh1	-0.296059	0.0308168
ENSMUSG00000000085	E044	Scmh1
ENSMUSG00000000085	E045	Scmh1
ENSMUSG00000000088	E001	Cox5a	0.00799637	0.885387	-0.0011824	0.999962	0.00244959	0.967301	-0.00721871	0.975284	0.00219959	0.98915
ENSMUSG00000000088	E002	Cox5a	-0.0216552	0.640132	-0.00784963	0.999962	0.00572085	0.911193	0.0175111	0.931033	-0.0429417	0.765711
ENSMUSG00000000088	E003	Cox5a	0.0133729	0.793219	0.00975398	0.999962	-0.00931394	0.86319	-0.00962515	0.968317	0.0385603	0.786997
ENSMUSG00000000088	E004	Cox5a
ENSMUSG00000000088	E005	Cox5a
ENSMUSG00000000093	E001	Tbx2
ENSMUSG00000000093	E002	Tbx2
ENSMUSG00000000093	E003	Tbx2
ENSMUSG00000000093	E004	Tbx2
ENSMUSG00000000093	E005	Tbx2
ENSMUSG00000000093	E006	Tbx2	-0.12825	0.931195
ENSMUSG00000000093	E007	Tbx2	0.169859	0.566869
ENSMUSG00000000094	E001	Tbx4
ENSMUSG00000000094	E002	Tbx4
ENSMUSG00000000094	E003	Tbx4
ENSMUSG00000000094	E004	Tbx4
ENSMUSG00000000094	E005	Tbx4
ENSMUSG00000000094	E006	Tbx4
ENSMUSG00000000094	E007	Tbx4
ENSMUSG00000000094	E008	Tbx4
ENSMUSG00000000094	E009	Tbx4
ENSMUSG00000000094	E010	Tbx4
ENSMUSG00000000094	E011	Tbx4
ENSMUSG00000000094	E012	Tbx4
ENSMUSG00000000103	E001	Zfy2
ENSMUSG00000000103	E002	Zfy2
ENSMUSG00000000103	E003	Zfy2
ENSMUSG00000000103	E004	Zfy2
ENSMUSG00000000103	E005	Zfy2
ENSMUSG00000000103	E006	Zfy2
ENSMUSG00000000103	E007	Zfy2
ENSMUSG00000000103	E008	Zfy2
ENSMUSG00000000103	E009	Zfy2
ENSMUSG00000000120	E001	Ngfr	-0.0456325	0.765542			0.0231001	0.849263				0.858379
ENSMUSG00000000120	E002	Ngfr	-0.10235	0.482175			-0.0916248	0.578805
ENSMUSG00000000120	E003	Ngfr	-0.00391594	0.979906			0.00664115	0.990315
ENSMUSG00000000120	E004	Ngfr	0.0688916	0.614025			0.026661	0.948443
ENSMUSG00000000120	E005	Ngfr	0.0888907	0.736695
ENSMUSG00000000120	E006	Ngfr	0.16834	0.583436
ENSMUSG00000000125	E001	Wnt3
ENSMUSG00000000125	E002	Wnt3	0.237854	0.678587
ENSMUSG00000000125	E003	Wnt3	0.303437	0.191784
ENSMUSG00000000125	E004	Wnt3	0.0427321	0.828923
ENSMUSG00000000125	E005	Wnt3	-0.19551	0.128385
ENSMUSG00000000126	E001	Wnt9a	-0.502053	0.369342
ENSMUSG00000000126	E002	Wnt9a	-0.0334098	0.999919
ENSMUSG00000000126	E003	Wnt9a	0.0575517	0.343438			-0.0194581	0.996401
ENSMUSG00000000126	E004	Wnt9a	0.159079	0.000632565			0.0504049	0.447082			-0.0609037	0.719817
ENSMUSG00000000126	E005	Wnt9a
ENSMUSG00000000126	E006	Wnt9a	0.0634313	0.51589			0.031385	0.814692
ENSMUSG00000000126	E007	Wnt9a	-0.0886388	0.0114235		0.999962	-0.0159691	0.97861		0.973682	0.0255006	0.767269
ENSMUSG00000000127	E001	Fer	0.198195	0.408922			0.181017	0.471512
ENSMUSG00000000127	E002	Fer	0.139004	0.435187			0.184652	0.326884
ENSMUSG00000000127	E003	Fer	0.0734224	0.699739
ENSMUSG00000000127	E004	Fer	0.102821	0.38156			0.0233177	0.931736
ENSMUSG00000000127	E005	Fer	0.008431	0.966114			-0.0521008	0.758279
ENSMUSG00000000127	E006	Fer	0.0325727	0.83604			-0.132953	0.439326
ENSMUSG00000000127	E007	Fer	-0.0187093	0.892835			-0.106579	0.359349
ENSMUSG00000000127	E008	Fer
ENSMUSG00000000127	E009	Fer	-0.0262502	0.831885			-0.0845772	0.467922			0.023643	0.765711
ENSMUSG00000000127	E010	Fer
ENSMUSG00000000127	E011	Fer
ENSMUSG00000000127	E012	Fer	-0.0450992	0.749956			0.0216511	0.92097
ENSMUSG00000000127	E013	Fer	-0.0342042	0.896995
ENSMUSG00000000127	E014	Fer	0.0657463	0.524147			0.0809192	0.572637			-0.0232085	0.953244
ENSMUSG00000000127	E015	Fer	0.0194577	0.906025			0.120152	0.310762
ENSMUSG00000000127	E016	Fer	-0.113231	0.407903			0.0328504	0.893447
ENSMUSG00000000127	E017	Fer	-0.104591	0.364104			-0.0992793	0.462089
ENSMUSG00000000127	E018	Fer	-0.185584	0.121146			-0.0676932	0.695096
ENSMUSG00000000127	E019	Fer	-0.0477244	0.758662			0.0891252	0.601959
ENSMUSG00000000127	E020	Fer	0.040843	0.796409			0.0122215	0.969463
ENSMUSG00000000127	E021	Fer	0.0285046	0.877404			0.0161293	0.959341
ENSMUSG00000000127	E022	Fer	-0.0575692	0.646193			-0.0721653	0.636466
ENSMUSG00000000131	E001	Xpo6	0.00388014	0.971031
ENSMUSG00000000131	E002	Xpo6	-0.0274633	0.941541
ENSMUSG00000000131	E003	Xpo6	-0.108986	0.780912
ENSMUSG00000000131	E004	Xpo6	-0.120148	0.221372			-0.0907432	0.393222			-0.0466008	0.857488
ENSMUSG00000000131	E005	Xpo6	-0.123049	0.0454777	-0.0334972	0.999962	-0.0909109	0.235141	-0.0189952	0.947655	-0.0305013	0.856092
ENSMUSG00000000131	E006	Xpo6	-0.138523	0.0372225			-0.0792305	0.645392			-0.014849	0.883131
ENSMUSG00000000131	E007	Xpo6	-0.178924	0.584202
ENSMUSG00000000131	E008	Xpo6	-0.495226	0.502759
ENSMUSG00000000131	E009	Xpo6	-0.149807	0.00667297			-0.0671442	0.65674	-0.00789428	0.959537	-0.0560364	0.586918
ENSMUSG00000000131	E010	Xpo6	-0.164035	0.00490661			-0.082917	0.404696			-0.0874973	0.430499
ENSMUSG00000000131	E011	Xpo6	-0.098615	0.184837			-0.0640235	0.572981			-0.152206	0.138412
ENSMUSG00000000131	E012	Xpo6	-0.140604	0.00238839	-0.0140819	0.999962	-0.0953812	0.129014	-0.0292319	0.891997	-0.0321718	0.736967
ENSMUSG00000000131	E013	Xpo6	-0.0761658	0.902879
ENSMUSG00000000131	E014	Xpo6	-0.116088	0.00886136	-0.0276142	0.999962	-0.0602731	0.495678	-0.0272613	0.88726	0.00211891	0.938143
ENSMUSG00000000131	E015	Xpo6	-0.0925769	0.175785			-0.0470909	0.656199	-0.0896897	0.35039	-0.0349429	0.689562
ENSMUSG00000000131	E016	Xpo6	-0.0905563	0.248204			-0.0112656	0.987216	-0.0502215	0.820366	0.00709541	0.984064
ENSMUSG00000000131	E017	Xpo6	-0.0762586	0.281564			-0.0445822	0.615961	-0.0424972	0.809611	0.0184129	0.983138
ENSMUSG00000000131	E018	Xpo6
ENSMUSG00000000131	E019	Xpo6	-0.027914	0.711102	-0.028666	0.999962	0.00761871	0.859963	-0.0136663	0.881324	0.0268177	0.929209
ENSMUSG00000000131	E020	Xpo6	-0.0191071	0.806567	-0.0256679	0.999962	0.0207343	0.660978	-0.0192042	0.818739	-0.0108756	0.826341
ENSMUSG00000000131	E021	Xpo6	-0.0969583	0.0451508	-0.0317561	0.999962	-0.063789	0.346462	-0.0143937	0.895552	-0.0672638	0.378663
ENSMUSG00000000131	E022	Xpo6	-0.0841834	0.183776			-0.0682724	0.5286	-0.0203315	0.859981	-0.119754	0.0917873
ENSMUSG00000000131	E023	Xpo6	-0.018379	0.879951			-0.00498926	0.97772	-0.0453127	0.681173	-0.0807441	0.293812
ENSMUSG00000000131	E024	Xpo6	-0.0450151	0.496595	-0.047651	0.999962	-0.0402771	0.642916	0.0171728	0.983015	0.022036	0.953244
ENSMUSG00000000131	E025	Xpo6	-0.123273	0.021122			-0.103576	0.112752	0.0551241	0.822741	0.0629811	0.717588
ENSMUSG00000000131	E026	Xpo6	-0.0513637	0.359166	-0.0410638	0.999962	-0.0560889	0.393415	-0.0191273	0.836282	-0.0147131	0.797398
ENSMUSG00000000131	E027	Xpo6	-0.00314406	0.988222			-0.00022675	0.948669	-0.0767014	0.479554	-0.0845302	0.384165
ENSMUSG00000000131	E028	Xpo6	0.0248453	0.838249			0.0219073	0.788079	-0.0101795	0.970969	-0.115244	0.473325
ENSMUSG00000000131	E029	Xpo6	0.0497617	0.602425			0.0182467	0.78597	-0.0169604	0.940204	-0.0483865	0.75
ENSMUSG00000000131	E030	Xpo6	0.0228641	0.848632	0.0548717	0.999962	0.00809575	0.848488	-0.00821493	0.971764	-0.0237891	0.866057
ENSMUSG00000000131	E031	Xpo6	0.0296721	0.622574	0.0451513	0.999962	0.0170324	0.704562	-0.0374238	0.75223	-0.0740783	0.400977
ENSMUSG00000000131	E032	Xpo6	0.393006	0.581674
ENSMUSG00000000131	E033	Xpo6	0.0478132	0.353117			0.0311429	0.593399	0.0206564	0.973576	-0.0462229	0.625561
ENSMUSG00000000131	E034	Xpo6	0.0171939	0.689244	0.0354371	0.999962	0.0377623	0.470728	0.0359786	0.875074	0.0177957	0.982693
ENSMUSG00000000131	E035	Xpo6	-0.0232006	0.821534			-0.0055992	0.992779	0.0484637	0.852812	0.0507974	0.796975
ENSMUSG00000000131	E036	Xpo6	0.0457077	0.403182			0.0672879	0.286711	0.0264555	0.956622	0.0385044	0.876846
ENSMUSG00000000131	E037	Xpo6	0.077178	0.382664			0.111196	0.208112			0.0683493	0.797848
ENSMUSG00000000131	E038	Xpo6	0.00206318	0.923059			-0.014018	0.945139	-0.0195106	0.884473	0.0421053	0.902741
ENSMUSG00000000131	E039	Xpo6	-0.0299539	0.776887			-0.0449866	0.641071	0.0228383	0.984409	0.0596255	0.73174
ENSMUSG00000000131	E040	Xpo6	0.00913665	0.898679			0.0054363	0.933425	0.0435465	0.946941	0.0410546	0.911622
ENSMUSG00000000131	E041	Xpo6	0.0378923	0.618686			0.0454565	0.59855			0.0616532	0.778104
ENSMUSG00000000131	E042	Xpo6	0.012736	0.821095			0.0178871	0.790308	0.0590675	0.778574	0.0533317	0.793172
ENSMUSG00000000131	E043	Xpo6	-0.0108258	0.966185			0.000601111	0.951905	0.0626581	0.774307	-0.0020728	0.91406
ENSMUSG00000000131	E044	Xpo6	-0.0359664	0.944964
ENSMUSG00000000131	E045	Xpo6	-0.266866	0.341721
ENSMUSG00000000131	E046	Xpo6	-0.458726	0.100242
ENSMUSG00000000131	E047	Xpo6	-0.275248	0.382522
ENSMUSG00000000131	E048	Xpo6	-0.0598121	0.930051
ENSMUSG00000000131	E049	Xpo6	-0.138517	0.776756
ENSMUSG00000000131	E050	Xpo6	0.0671708	0.0710627	0.0381818	0.999962	0.00185173	0.933032	-0.0202959	0.791567	0.0202662	0.970389
ENSMUSG00000000131	E051	Xpo6	0.119573	0.0010298	0.048617	0.999962	0.00390169	0.924769	-0.00099128	0.962792	0.0111577	0.986837
ENSMUSG00000000131	E052	Xpo6	0.204432	3.14915e-05			0.0845877	0.204261	-0.0345185	0.797981	-0.0648155	0.494631
ENSMUSG00000000131	E053	Xpo6	0.251168	6.07416e-05			0.155421	0.043898			-0.0922987	0.406968
ENSMUSG00000000131	E054	Xpo6	0.210109	4.26522e-06			0.0948554	0.212628	-0.0167137	0.85625	0.0752679	0.473061
ENSMUSG00000000131	E055	Xpo6	0.20002	0.00677131			0.0730173	0.598549			0.092586	0.595331
ENSMUSG00000000131	E056	Xpo6	0.222708	0.00241385			0.0842593	0.585375			0.0870413	0.625485
ENSMUSG00000000131	E057	Xpo6	0.18902	0.00147802			0.111503	0.106587	0.0262697	0.975574	0.0622846	0.766834
ENSMUSG00000000131	E058	Xpo6	0.151427	0.0116221			0.11974	0.0981451	0.028897	0.978169	0.0237621	0.980073
ENSMUSG00000000131	E059	Xpo6	0.161199	0.0298343			0.114236	0.153938	0.0323081	0.973545	0.0166788	0.997734
ENSMUSG00000000131	E060	Xpo6	0.153044	0.08136			0.124701	0.166098	0.0982485	0.777073	0.072515	0.828292
ENSMUSG00000000131	E061	Xpo6
ENSMUSG00000000131	E062	Xpo6	0.154048	0.110688			0.150709	0.112596	0.137818	0.63831	0.162403	0.490374
ENSMUSG00000000131	E063	Xpo6	0.0285377	0.843044			0.0778281	0.593032	0.160928	0.627754	0.179946	0.546374
ENSMUSG00000000131	E064	Xpo6	-0.450414	0.246867			-0.211964	0.73094
ENSMUSG00000000131	E065	Xpo6	-0.422459	0.352865			-0.348948	0.615961
ENSMUSG00000000131	E066	Xpo6	-0.413381	0.350751
ENSMUSG00000000131	E067	Xpo6	-0.499638	0.282635
ENSMUSG00000000134	E001	Tfe3
ENSMUSG00000000134	E002	Tfe3	-0.495603	0.324831
ENSMUSG00000000134	E003	Tfe3
ENSMUSG00000000134	E004	Tfe3
ENSMUSG00000000134	E005	Tfe3	0.132429	0.755799
ENSMUSG00000000134	E006	Tfe3	0.132429	0.755799
ENSMUSG00000000134	E007	Tfe3	0.201546	0.163069
ENSMUSG00000000134	E008	Tfe3	0.209296	7.07589e-07			0.148661	0.0209792	-0.027612	0.81198	0.0168084	0.957672
ENSMUSG00000000134	E009	Tfe3
ENSMUSG00000000134	E010	Tfe3
ENSMUSG00000000134	E011	Tfe3
ENSMUSG00000000134	E012	Tfe3
ENSMUSG00000000134	E013	Tfe3
ENSMUSG00000000134	E014	Tfe3
ENSMUSG00000000134	E015	Tfe3
ENSMUSG00000000134	E016	Tfe3
ENSMUSG00000000134	E017	Tfe3	0.160696	0.000177473			0.143732	0.00738678	-0.00522358	0.951506	-0.0361453	0.765769
ENSMUSG00000000134	E018	Tfe3
ENSMUSG00000000134	E019	Tfe3	0.0927191	0.213993			0.0974871	0.320549			0.0734414	0.734224
ENSMUSG00000000134	E020	Tfe3	0.139797	0.0145203			0.104465	0.168579			0.0357546	0.864709
ENSMUSG00000000134	E021	Tfe3	0.134692	0.00146747			0.0780743	0.199684	0.0074375	0.99181	-0.0212046	0.864709
ENSMUSG00000000134	E022	Tfe3	0.101927	0.196073			0.0430469	0.749822
ENSMUSG00000000134	E023	Tfe3	0.100779	0.246107			0.0615731	0.51075			0.0578802	0.869101
ENSMUSG00000000134	E024	Tfe3
ENSMUSG00000000134	E025	Tfe3	0.0992379	0.0213169			0.047265	0.356896	-0.039543	0.727357	0.02124	0.971932
ENSMUSG00000000134	E026	Tfe3	-0.100415	0.277719			-0.0520932	0.70267			-0.0483663	0.771689
ENSMUSG00000000134	E027	Tfe3	-0.0296359	0.937768			-0.041999	0.754859	-0.0649053	0.63785	0.000993084	0.989423
ENSMUSG00000000134	E028	Tfe3	-0.498466	0.060372
ENSMUSG00000000134	E029	Tfe3	-0.076591	0.545333			-0.0699732	0.602095			-0.0404907	0.826878
ENSMUSG00000000134	E030	Tfe3	-0.230916	0.73887
ENSMUSG00000000134	E031	Tfe3	-0.123714	0.247439			-0.0918559	0.603403			-0.0556999	0.727922
ENSMUSG00000000134	E032	Tfe3	-0.890694	0.115866
ENSMUSG00000000134	E033	Tfe3	-0.366153	0.205447
ENSMUSG00000000134	E034	Tfe3	-0.163986	0.00773782			-0.101803	0.208168	0.0290916	0.947566	0.00528036	0.986609
ENSMUSG00000000134	E035	Tfe3	-0.229996	0.74931
ENSMUSG00000000134	E036	Tfe3	-0.293697	2.34496e-09		0.999962	-0.132369	0.00196254	0.0995797	0.716449	0.0212038	0.965366
ENSMUSG00000000134	E037	Tfe3
ENSMUSG00000000134	E038	Tfe3
ENSMUSG00000000134	E039	Tfe3
ENSMUSG00000000142	E001	Axin2	0.0836379	0.817429
ENSMUSG00000000142	E002	Axin2	-0.159479	0.610416
ENSMUSG00000000142	E003	Axin2
ENSMUSG00000000142	E004	Axin2	1.2308	0.0231751
ENSMUSG00000000142	E005	Axin2	0.289627	0.146607
ENSMUSG00000000142	E006	Axin2	0.103794	0.434292			0.0212429	0.948537
ENSMUSG00000000142	E007	Axin2	-0.0141527	0.961202
ENSMUSG00000000142	E008	Axin2	0.0433089	0.838913
ENSMUSG00000000142	E009	Axin2	0.226741	0.010396			0.0445818	0.809614			-0.0885033	0.659274
ENSMUSG00000000142	E010	Axin2	0.303911	0.093303
ENSMUSG00000000142	E011	Axin2
ENSMUSG00000000142	E012	Axin2
ENSMUSG00000000142	E013	Axin2	0.478809	0.10408
ENSMUSG00000000142	E014	Axin2	0.147389	0.0774441			0.0897829	0.628804			0.00532491	0.971412
ENSMUSG00000000142	E015	Axin2	0.0198158	0.871994			0.036015	0.936891
ENSMUSG00000000142	E016	Axin2	0.0887749	0.360341			0.116207	0.449554			-0.0161072	0.977413
ENSMUSG00000000142	E017	Axin2
ENSMUSG00000000142	E018	Axin2	-0.0362153	0.747192			0.039672	0.768763			-0.0491751	0.805262
ENSMUSG00000000142	E019	Axin2	-0.113566	0.235192			-0.0935221	0.406337
ENSMUSG00000000142	E020	Axin2	-0.135525	0.0742347			-0.0693682	0.461085			0.00436037	0.974765
ENSMUSG00000000142	E021	Axin2	-0.16666	0.0329316			-0.0648162	0.547905			0.0876418	0.552394
ENSMUSG00000000142	E022	Axin2	-0.304603	0.0089048			-0.119715	0.533402			0.151219	0.626493
ENSMUSG00000000148	E001	Brat1
ENSMUSG00000000148	E002	Brat1	0.204043	0.48315
ENSMUSG00000000148	E003	Brat1	0.204043	0.48315
ENSMUSG00000000148	E004	Brat1	0.187868	0.412327
ENSMUSG00000000148	E005	Brat1	0.136737	0.471534
ENSMUSG00000000148	E006	Brat1	-0.0953703	0.791713
ENSMUSG00000000148	E007	Brat1	0.138775	0.262039			0.181201	0.222483
ENSMUSG00000000148	E008	Brat1	0.11037	0.507186			0.235533	0.200553
ENSMUSG00000000148	E009	Brat1	0.241861	0.503796
ENSMUSG00000000148	E010	Brat1	0.125433	0.245981			0.163549	0.227187
ENSMUSG00000000148	E011	Brat1	-0.0238009	0.82512			-0.00814223	0.880762			0.0515769	0.212243
ENSMUSG00000000148	E012	Brat1	-0.0494821	0.931075
ENSMUSG00000000148	E013	Brat1	0.0371371	0.965805
ENSMUSG00000000148	E014	Brat1	-0.07584	0.52695			-0.192019	0.0652627
ENSMUSG00000000148	E015	Brat1	-0.0101215	0.953964			-0.141454	0.282851
ENSMUSG00000000148	E016	Brat1	-0.0539138	0.674146			-0.0807037	0.483145
ENSMUSG00000000148	E017	Brat1	-0.059857	0.59334			-0.0454211	0.637628
ENSMUSG00000000148	E018	Brat1	0.0402139	0.74812			-0.0726117	0.656654
ENSMUSG00000000148	E019	Brat1	-0.169965	0.635956
ENSMUSG00000000148	E020	Brat1	-0.227312	0.936781
ENSMUSG00000000148	E021	Brat1	0.0136974	0.917506			-0.0273403	0.809945
ENSMUSG00000000148	E022	Brat1	0.0165154	0.904722			0.0186499	0.9948
ENSMUSG00000000148	E023	Brat1	0.0346793	0.753915			0.0505508	0.857963
ENSMUSG00000000148	E024	Brat1	0.335519	0.674628
ENSMUSG00000000148	E025	Brat1	-0.111267	0.0830211			0.0154445	0.988884		0.924275	-0.0446556	0.773828
ENSMUSG00000000148	E026	Brat1	-0.133977	0.778068
ENSMUSG00000000148	E027	Brat1	-0.341509	0.576042
ENSMUSG00000000149	E001	Gna12	-0.165816	0.0937292		0.999962	-0.166915	0.128287	0.0400818	0.834664	0.131409	0.127562
ENSMUSG00000000149	E002	Gna12	0.09336	0.0430429			0.117519	0.052538			0.0175555	0.609528
ENSMUSG00000000149	E003	Gna12	0.0380521	0.15355			0.033736	0.22859	-0.0428027	0.806942	-0.133905	0.0768312
ENSMUSG00000000149	E004	Gna12	0.0431468	0.13193			0.0469885	0.205363	-0.0130726	0.889984	-0.0727219	0.221175
ENSMUSG00000000154	E001	Slc22a18
ENSMUSG00000000154	E002	Slc22a18
ENSMUSG00000000154	E003	Slc22a18
ENSMUSG00000000154	E004	Slc22a18
ENSMUSG00000000154	E005	Slc22a18
ENSMUSG00000000154	E006	Slc22a18
ENSMUSG00000000154	E007	Slc22a18	-0.159127	0.81115
ENSMUSG00000000154	E008	Slc22a18
ENSMUSG00000000154	E009	Slc22a18	-0.167882	0.786175
ENSMUSG00000000154	E010	Slc22a18	0.535397	0.214945
ENSMUSG00000000154	E011	Slc22a18	0.334342	0.601569
ENSMUSG00000000154	E012	Slc22a18
ENSMUSG00000000154	E013	Slc22a18
ENSMUSG00000000154	E014	Slc22a18
ENSMUSG00000000154	E015	Slc22a18	-0.616471	0.244073
ENSMUSG00000000154	E016	Slc22a18
ENSMUSG00000000154	E017	Slc22a18
ENSMUSG00000000154	E018	Slc22a18
ENSMUSG00000000154	E019	Slc22a18
ENSMUSG00000000154	E020	Slc22a18
ENSMUSG00000000157	E001	Itgb2l
ENSMUSG00000000157	E002	Itgb2l
ENSMUSG00000000157	E003	Itgb2l
ENSMUSG00000000157	E004	Itgb2l
ENSMUSG00000000157	E005	Itgb2l
ENSMUSG00000000157	E006	Itgb2l
ENSMUSG00000000157	E007	Itgb2l
ENSMUSG00000000157	E008	Itgb2l
ENSMUSG00000000157	E009	Itgb2l
ENSMUSG00000000157	E010	Itgb2l
ENSMUSG00000000157	E011	Itgb2l
ENSMUSG00000000157	E012	Itgb2l
ENSMUSG00000000157	E013	Itgb2l
ENSMUSG00000000157	E014	Itgb2l
ENSMUSG00000000157	E015	Itgb2l
ENSMUSG00000000157	E016	Itgb2l
ENSMUSG00000000157	E017	Itgb2l
ENSMUSG00000000157	E018	Itgb2l
ENSMUSG00000000157	E019	Itgb2l
ENSMUSG00000000157	E020	Itgb2l
ENSMUSG00000000157	E021	Itgb2l
ENSMUSG00000000157	E022	Itgb2l
ENSMUSG00000000157	E023	Itgb2l
ENSMUSG00000000157	E024	Itgb2l
ENSMUSG00000000159	E001	Igsf5
ENSMUSG00000000159	E002	Igsf5
ENSMUSG00000000159	E003	Igsf5
ENSMUSG00000000159	E004	Igsf5
ENSMUSG00000000159	E005	Igsf5
ENSMUSG00000000159	E006	Igsf5
ENSMUSG00000000159	E007	Igsf5
ENSMUSG00000000159	E008	Igsf5
ENSMUSG00000000159	E009	Igsf5
ENSMUSG00000000159	E010	Igsf5
ENSMUSG00000000159	E011	Igsf5
ENSMUSG00000000159	E012	Igsf5
ENSMUSG00000000159	E013	Igsf5
ENSMUSG00000000159	E014	Igsf5
ENSMUSG00000000159	E015	Igsf5
ENSMUSG00000000159	E016	Igsf5
ENSMUSG00000000159	E017	Igsf5
ENSMUSG00000000167	E001	Pih1d2
ENSMUSG00000000167	E002	Pih1d2
ENSMUSG00000000167	E003	Pih1d2
ENSMUSG00000000167	E004	Pih1d2
ENSMUSG00000000167	E005	Pih1d2	0.668589	0.31429
ENSMUSG00000000167	E006	Pih1d2	-0.12051	0.84051
ENSMUSG00000000167	E007	Pih1d2	-0.119996	0.819507
ENSMUSG00000000167	E008	Pih1d2
ENSMUSG00000000167	E009	Pih1d2
ENSMUSG00000000167	E010	Pih1d2
ENSMUSG00000000167	E011	Pih1d2
ENSMUSG00000000167	E012	Pih1d2	0.213721	0.824177
ENSMUSG00000000167	E013	Pih1d2	-0.0158659	0.97823
ENSMUSG00000000167	E014	Pih1d2	0.248172	0.424263
ENSMUSG00000000167	E015	Pih1d2	-0.0203229	0.975447
ENSMUSG00000000167	E016	Pih1d2	-0.168956	0.707917
ENSMUSG00000000167	E017	Pih1d2	-0.0141458	0.996185
ENSMUSG00000000167	E018	Pih1d2	0.170132	0.543233
ENSMUSG00000000167	E019	Pih1d2	-0.195839	0.529553
ENSMUSG00000000167	E020	Pih1d2	-0.180516	0.727122
ENSMUSG00000000167	E021	Pih1d2	0.100348	0.828097
ENSMUSG00000000167	E022	Pih1d2	0.0134431	0.996591
ENSMUSG00000000167	E023	Pih1d2
ENSMUSG00000000168	E001	Dlat	-0.251321	8.9156e-08	-0.00515208	0.999962	-0.0707332	0.112153	0.0674081	0.674116	0.0991975	0.433853
ENSMUSG00000000168	E002	Dlat	-0.312847	8.96533e-05	-0.0158804	0.999962	-0.0991913	0.193363	0.142769	0.455524	0.0907346	0.746746
ENSMUSG00000000168	E003	Dlat	-0.218851	1.6742e-08	0.00905189	0.999962	-0.0786249	0.0137134	0.0668379	0.623965	0.0875638	0.46178
ENSMUSG00000000168	E004	Dlat	-0.123499	1.58694e-05	-0.00924356	0.999962	-0.0750309	0.00960752	0.0191212	0.948908	0.0241799	0.910109
ENSMUSG00000000168	E005	Dlat	-0.151998	0.873539
ENSMUSG00000000168	E006	Dlat	-0.109484	0.02748	-0.0281507	0.999962	-0.0428514	0.490392	0.0352243	0.906644	0.0265502	0.938991
ENSMUSG00000000168	E007	Dlat	-0.104268	0.00349516	-0.0331217	0.999962	-0.0543891	0.152496	0.00330706	0.978386	0.00318852	0.916075
ENSMUSG00000000168	E008	Dlat	-0.103268	0.122495	-0.0156441	0.999962	-0.0402712	0.652583	-0.0284017	0.848065	-0.020016	0.806301
ENSMUSG00000000168	E009	Dlat	-0.105067	0.0638042	0.00131803	0.999962	-0.0504744	0.440309	-0.0475297	0.803914	0.00392605	0.939217
ENSMUSG00000000168	E010	Dlat	-0.0966141	0.0415475	-0.0192632	0.999962	-0.0524325	0.295105	-0.0422457	0.821751	-0.0414003	0.522305
ENSMUSG00000000168	E011	Dlat
ENSMUSG00000000168	E012	Dlat	-0.0240512	0.96756	-0.0447852	0.999962	-0.0301878	0.684299	-0.024212	0.760969	-0.0302151	0.570388
ENSMUSG00000000168	E013	Dlat	0.0346839	0.172037	-0.0608377	0.999962	-0.00307056	0.999523	-0.0528284	0.609551	-0.0406922	0.494732
ENSMUSG00000000168	E014	Dlat
ENSMUSG00000000168	E015	Dlat
ENSMUSG00000000168	E016	Dlat
ENSMUSG00000000168	E017	Dlat	0.108961	0.0125756	0.0150848	0.999962	0.0278392	0.662621	-0.0792016	0.615006	-0.0521784	0.701657
ENSMUSG00000000168	E018	Dlat
ENSMUSG00000000168	E019	Dlat	0.133956	9.82666e-05	0.0111766	0.999962	0.068808	0.0155839	-0.0349118	0.800535	-0.0251483	0.836531
ENSMUSG00000000168	E020	Dlat	0.15345	0.000537459	0.0271738	0.999962	0.106737	0.000106806	-0.0136736	0.961794	-0.0908649	0.444783
ENSMUSG00000000168	E021	Dlat	0.177608	8.07243e-12	0.0137767	0.999962	0.112164	0.000116591	0.00318592	0.998148	0.00180891	0.973642
ENSMUSG00000000168	E022	Dlat	0.200301	1.02696e-17	0.0646949	0.999962	0.106953	9.18126e-05	0.0356827	0.770906	0.0453753	0.596564
ENSMUSG00000000168	E023	Dlat	0.187614	6.95083e-06	0.0327574	0.999962	0.0779273	0.186047	-0.00501785	0.978864	-0.0527814	0.60538
ENSMUSG00000000168	E024	Dlat	0.236698	3.90758e-09	0.0456733	0.999962	0.0840018	0.0818074	-0.0305564	0.868131	0.000813046	0.981989
ENSMUSG00000000171	E001	Sdhd	-0.0650921	0.0120853	0.00155952	0.999962	-0.0194363	0.315427	0.0217735	0.984009	0.0717936	0.207352
ENSMUSG00000000171	E002	Sdhd	-0.0538996	0.526434	0.0209077	0.999962	0.00612656	0.822257	0.0459453	0.608908	-0.0420252	0.425092
ENSMUSG00000000171	E003	Sdhd	0.0666706	0.0142998	9.33685e-05	0.999962	0.0218759	0.581092	-0.019518	0.897775	-0.014106	0.774836
ENSMUSG00000000171	E004	Sdhd	0.0943084	0.000804201	-0.0260497	0.999962	0.0264224	0.650655	-0.0654351	0.567723	-0.0548182	0.415285
ENSMUSG00000000182	E001	Fgf23
ENSMUSG00000000182	E002	Fgf23
ENSMUSG00000000182	E003	Fgf23
ENSMUSG00000000183	E001	Fgf6
ENSMUSG00000000183	E002	Fgf6
ENSMUSG00000000183	E003	Fgf6
ENSMUSG00000000184	E001	Ccnd2	-0.112188	0.00784372		0.999962	-0.0589407	0.468093	0.0211947	0.851394	0.0102061	0.755291
ENSMUSG00000000184	E002	Ccnd2	0.169969	2.40627e-05			0.0591969	0.438864	0.00383111	0.936039	-0.0410326	0.693185
ENSMUSG00000000184	E003	Ccnd2	0.234349	4.52697e-09			0.0614098	0.410403	-0.0273428	0.793659	-0.0547728	0.516526
ENSMUSG00000000184	E004	Ccnd2	-0.0284864	0.647253			0.00972263	0.773004	-0.0246831	0.864095	0.0085186	0.974521
ENSMUSG00000000184	E005	Ccnd2	-0.136443	0.385752			-0.0195938	0.93351	0.0114206	0.996712	0.0307802	0.831374
ENSMUSG00000000194	E001	Gpr107	0.100459	0.860606
ENSMUSG00000000194	E002	Gpr107	0.208843	0.295845
ENSMUSG00000000194	E003	Gpr107	0.209146	0.0399873			0.126352	0.452765			-0.0728695	0.806199
ENSMUSG00000000194	E004	Gpr107	0.0378908	0.692407			0.137539	0.25156	0.0524178	0.75263	-0.0130701	0.989423
ENSMUSG00000000194	E005	Gpr107
ENSMUSG00000000194	E006	Gpr107	-0.00303297	0.927876			0.0928243	0.668706			-0.034604	0.945956
ENSMUSG00000000194	E007	Gpr107	0.00601544	0.892162			0.0903103	0.660589			-0.052499	0.870106
ENSMUSG00000000194	E008	Gpr107	0.00179177	0.907793			0.00869358	0.915264	0.0579952	0.848777	-0.073426	0.763556
ENSMUSG00000000194	E009	Gpr107
ENSMUSG00000000194	E010	Gpr107	0.0652483	0.36785			0.0143824	0.901869	0.0109487	0.928842	-0.0427105	0.842652
ENSMUSG00000000194	E011	Gpr107
ENSMUSG00000000194	E012	Gpr107	0.179252	0.00933303			0.103496	0.362357	-0.060229	0.805647	-0.0290376	0.952705
ENSMUSG00000000194	E013	Gpr107	0.167215	0.00897314			0.150994	0.0472665	0.00975096	0.971756	0.0379814	0.756355
ENSMUSG00000000194	E014	Gpr107	0.0518911	0.382139			0.0757334	0.315052	0.0508841	0.589431	0.049156	0.551581
ENSMUSG00000000194	E015	Gpr107	-0.0378451	0.611921			0.00149747	0.989405	0.0580951	0.525064	0.0528095	0.372476
ENSMUSG00000000194	E016	Gpr107	0.0183733	0.824803			0.0144978	0.915107	0.0162716	0.922532	0.0756866	0.253896
ENSMUSG00000000194	E017	Gpr107	0.0109108	0.908115			0.0186443	0.901938	0.046474	0.769109	0.117209	0.0702322
ENSMUSG00000000194	E018	Gpr107	0.0344329	0.749338			0.0631676	0.701538			0.133388	0.102878
ENSMUSG00000000194	E019	Gpr107
ENSMUSG00000000194	E020	Gpr107	-0.00348422	0.983104			0.0362537	0.747013	-0.00583982	0.987493	0.0837217	0.265576
ENSMUSG00000000194	E021	Gpr107
ENSMUSG00000000194	E022	Gpr107	-0.105636	0.38085			-0.0912487	0.444507	-0.00238871	0.978158	0.0795992	0.597556
ENSMUSG00000000194	E023	Gpr107	-0.103231	0.27858			-0.122895	0.427552			0.0012935	0.928558
ENSMUSG00000000194	E024	Gpr107	-0.0801718	0.354215			-0.055007	0.663714			-0.0134081	0.980238
ENSMUSG00000000194	E025	Gpr107	-0.042409	0.67917			-0.0154829	0.915107	-0.0280743	0.957473	0.0143956	0.837603
ENSMUSG00000000194	E026	Gpr107
ENSMUSG00000000194	E027	Gpr107
ENSMUSG00000000194	E028	Gpr107	-1.07066	0.00117007
ENSMUSG00000000194	E029	Gpr107	-0.0975941	0.257158			-0.0772337	0.542778			0.00197924	0.914948
ENSMUSG00000000194	E030	Gpr107	-0.105173	0.26096			-0.0680035	0.678429			-0.00523185	0.952133
ENSMUSG00000000194	E031	Gpr107	-0.0559823	0.474867			-0.133931	0.0917913	-0.0206065	0.977884	-0.0794691	0.605358
ENSMUSG00000000194	E032	Gpr107
ENSMUSG00000000194	E033	Gpr107
ENSMUSG00000000194	E034	Gpr107
ENSMUSG00000000194	E035	Gpr107
ENSMUSG00000000194	E036	Gpr107	-0.021279	0.821631			-0.142976	0.0499738	-0.0524566	0.822885	-0.0907595	0.457273
ENSMUSG00000000194	E037	Gpr107	-0.0850398	0.434885			-0.153237	0.128647	-0.0519986	0.885805	-0.0541513	0.825405
ENSMUSG00000000194	E038	Gpr107	-0.0174017	0.809715		0.999962	0.00733309	0.86198	-0.0509472	0.689266	-0.100905	0.141693
ENSMUSG00000000194	E039	Gpr107	0.129699	0.783151
ENSMUSG00000000194	E040	Gpr107	0.0137506	0.970292
ENSMUSG00000000194	E041	Gpr107	0.244241	0.746258
ENSMUSG00000000197	E001	Nalcn	-0.232027	1.60241e-24	-0.012371	0.999962	-0.119534	0.00252916	0.0241295	0.827468	0.0165516	0.570981
ENSMUSG00000000197	E002	Nalcn	-0.0677004	0.291326	-0.0243874	0.999962	-0.00664992	0.976654	-0.0773993	0.593218	-0.130196	0.167358
ENSMUSG00000000197	E003	Nalcn	0.0169685	0.722875	-0.0161783	0.999962	0.0688103	0.104368	-0.0564616	0.718887	-0.108114	0.414525
ENSMUSG00000000197	E004	Nalcn	0.0112155	0.783401	-0.00763552	0.999962	0.0423043	0.385068	-0.0237984	0.919511	-0.0780209	0.56134
ENSMUSG00000000197	E005	Nalcn	0.000193134	0.861947	0.00134436	0.999962	0.0227398	0.416254	-0.0260769	0.895714	-0.0505497	0.760362
ENSMUSG00000000197	E006	Nalcn	-0.0585089	0.276514	0.00236583	0.999962	-0.0531062	0.400331	-0.014187	0.957182	0.0326068	0.550996
ENSMUSG00000000197	E007	Nalcn	-0.0745532	0.14193	0.0126723	0.999962	-0.0240266	0.9023	-0.00969277	0.977154	0.0432415	0.3852
ENSMUSG00000000197	E008	Nalcn	-0.0680742	0.271824	0.032502	0.999962	-0.0285994	0.888141	-0.0212322	0.848854	0.0305144	0.644954
ENSMUSG00000000197	E009	Nalcn	-0.0492783	0.4828	0.0147343	0.999962	-0.0692214	0.378449	-0.0242884	0.857732	0.0174028	0.786326
ENSMUSG00000000197	E010	Nalcn	-0.0470535	0.643326			-0.0442838	0.802183	0.00364323	0.998198	-0.0133961	0.91268
ENSMUSG00000000197	E011	Nalcn	-0.0197909	0.985802	0.0276809	0.999962	-0.0363725	0.780856	-0.0258334	0.817202	0.00048686	0.975673
ENSMUSG00000000197	E012	Nalcn	-0.0131842	0.998185			-0.0160793	0.984225	0.0195784	0.937109	-0.0119542	0.990804
ENSMUSG00000000197	E013	Nalcn	0.00692304	0.841617			-0.0108169	0.995889	0.00883061	0.981018	-0.0184765	0.92126
ENSMUSG00000000197	E014	Nalcn	0.0170375	0.543149			0.015116	0.765756	0.00751882	0.987569	-0.0486511	0.589587
ENSMUSG00000000197	E015	Nalcn	0.0291541	0.430323			0.0524467	0.396665	0.0243152	0.914501	0.000769436	0.992827
ENSMUSG00000000197	E016	Nalcn	0.0441319	0.461862			0.0253295	0.766049	0.00317454	0.985655	0.00767565	0.937106
ENSMUSG00000000197	E017	Nalcn	-0.0116342	0.961012			-0.00615438	0.966282	0.0228774	0.923634	0.0451786	0.681297
ENSMUSG00000000197	E018	Nalcn	-0.0370576	0.852249			-0.0217922	0.965373	0.00714001	0.990991	0.0489978	0.639598
ENSMUSG00000000197	E019	Nalcn	0.0671445	0.0784497			0.0771993	0.241471	0.0372982	0.824271	0.0849663	0.388858
ENSMUSG00000000197	E020	Nalcn	0.042902	0.404357			0.0633465	0.379307	0.0500553	0.812763	0.0900333	0.356612
ENSMUSG00000000197	E021	Nalcn	0.0405525	0.300965			0.0421886	0.565049	0.0537645	0.687812	0.0221816	0.836688
ENSMUSG00000000197	E022	Nalcn	0.120204	0.011851			0.0849114	0.462582	-0.00858274	0.962616	-0.0707285	0.51866
ENSMUSG00000000197	E023	Nalcn	0.117533	0.0269207			0.0481883	0.711667	-0.0417481	0.807791	-0.0693254	0.54574
ENSMUSG00000000197	E024	Nalcn	0.00187844	0.937047			-0.0583912	0.653593	0.0367623	0.865472	0.0258509	0.827939
ENSMUSG00000000197	E025	Nalcn	0.0169539	0.741524			-0.062417	0.64253	0.0124793	0.969967	0.0246445	0.830872
ENSMUSG00000000197	E026	Nalcn	0.00960136	0.769573			-0.0552943	0.686145	-0.0188476	0.945981	-0.0160079	0.932264
ENSMUSG00000000197	E027	Nalcn	0.00520686	0.784978			0.0167415	0.858456	0.0331011	0.902162	-0.0186705	0.915591
ENSMUSG00000000197	E028	Nalcn	0.0323504	0.687081			0.0145293	0.817541	0.0376752	0.882803	0.0184017	0.907457
ENSMUSG00000000197	E029	Nalcn	0.0665274	0.337078			0.00697189	0.878036	0.0629951	0.718285	0.00682998	0.947429
ENSMUSG00000000197	E030	Nalcn	0.0733779	0.262987			0.0177351	0.841747	0.0112308	0.985916	-0.0120814	0.952781
ENSMUSG00000000197	E031	Nalcn	0.076785	0.300124			0.00904055	0.871288	0.00795917	0.98723	-0.00692541	0.987652
ENSMUSG00000000197	E032	Nalcn	0.0323978	0.643107			0.000685365	0.975886	0.062917	0.65765	0.06946	0.553547
ENSMUSG00000000197	E033	Nalcn	0.0186532	0.844406			-0.002615	0.99463	0.0865447	0.684776	0.128706	0.271277
ENSMUSG00000000197	E034	Nalcn	0.146068	0.198923			0.0198385	0.893519	-0.0382667	0.934355	0.02437	0.905213
ENSMUSG00000000197	E035	Nalcn	0.268372	0.00086628			0.137865	0.0649417	-0.0532129	0.929809	-0.084938	0.680384
ENSMUSG00000000197	E036	Nalcn	0.261862	0.000736196			0.148571	0.0780945	-0.0953369	0.832591	-0.13915	0.337273
ENSMUSG00000000197	E037	Nalcn	0.328645	4.55799e-08			0.164365	0.0140734	-0.052461	0.895676	-0.0558431	0.807158
ENSMUSG00000000197	E038	Nalcn	0.166164	0.0117399			0.0302483	0.752915	-0.0294044	0.928	0.012656	0.942297
ENSMUSG00000000197	E039	Nalcn	0.0680019	0.444029			-0.0614849	0.743667			-0.00600125	0.996216
ENSMUSG00000000197	E040	Nalcn	0.107997	0.054045			-0.0091965	0.983033	0.0607004	0.803253	0.0478862	0.707029
ENSMUSG00000000197	E041	Nalcn	0.0880392	0.217706			-0.0121804	0.993654			0.0804881	0.543942
ENSMUSG00000000197	E042	Nalcn	0.133604	0.0602095			-0.00912551	0.979434	0.0620469	0.853187	0.00532862	0.94796
ENSMUSG00000000197	E043	Nalcn	0.126228	0.0968072			-0.0666687	0.784596			-0.0285285	0.933481
ENSMUSG00000000197	E044	Nalcn	0.143612	0.180776			-0.0725058	0.819803			-0.0240043	0.956462
ENSMUSG00000000202	E001	Btbd17	-0.319634	0.218597			-0.206989	0.493932	0.231734	0.710137	0.211663	0.745574
ENSMUSG00000000202	E002	Btbd17	-0.1649	0.405139			-0.138841	0.508099	0.147627	0.708935	0.12054	0.811159
ENSMUSG00000000202	E003	Btbd17	-0.0200055	0.62935			-0.0462012	0.98157	0.0598198	0.913273	0.0303716	0.964095
ENSMUSG00000000202	E004	Btbd17	0.0720088	0.18523			0.0411181	0.554255	-0.0511759	0.527167	0.00105945	0.961205
ENSMUSG00000000202	E005	Btbd17	0.0138697	0.522815			0.00439082	0.707414	-0.038298	0.655532	-0.0113092	0.945984
ENSMUSG00000000202	E006	Btbd17	-0.275283	0.785725
ENSMUSG00000000202	E007	Btbd17	-0.535743	0.0528183
ENSMUSG00000000202	E008	Btbd17	0.0283126	0.527648			0.0408361	0.757611	-0.083614	0.613964	-0.129218	0.486324
ENSMUSG00000000202	E009	Btbd17	0.21021	0.113053			0.229879	0.258544	-0.0943031	0.778529	-0.0612183	0.887033
ENSMUSG00000000202	E010	Btbd17	-0.00175427	0.871806
ENSMUSG00000000202	E011	Btbd17	0.0870722	0.477584			0.0573589	0.818761	-0.0775301	0.81615	-0.061409	0.928275
ENSMUSG00000000202	E012	Btbd17	0.107324	0.709692
ENSMUSG00000000202	E013	Btbd17	0.0622927	0.860555
ENSMUSG00000000202	E014	Btbd17	-0.0415351	0.981263
ENSMUSG00000000202	E015	Btbd17	0.0573893	0.885856
ENSMUSG00000000202	E016	Btbd17	0.206851	0.705338
ENSMUSG00000000204	E001	Slfn4
ENSMUSG00000000204	E002	Slfn4
ENSMUSG00000000204	E003	Slfn4
ENSMUSG00000000204	E004	Slfn4
ENSMUSG00000000204	E005	Slfn4
ENSMUSG00000000204	E006	Slfn4
ENSMUSG00000000204	E007	Slfn4
ENSMUSG00000000204	E008	Slfn4
ENSMUSG00000000204	E009	Slfn4
ENSMUSG00000000204	E010	Slfn4
ENSMUSG00000000204	E011	Slfn4
ENSMUSG00000000214	E001	Th	-0.0929874	0.87073
ENSMUSG00000000214	E002	Th	-0.236217	0.326738
ENSMUSG00000000214	E003	Th	-0.136338	0.611593
ENSMUSG00000000214	E004	Th	-0.261569	0.425706
ENSMUSG00000000214	E005	Th	-0.165765	0.735132
ENSMUSG00000000214	E006	Th	-0.197148	0.492119
ENSMUSG00000000214	E007	Th	0.213478	0.376855
ENSMUSG00000000214	E008	Th	0.0727374	0.777876
ENSMUSG00000000214	E009	Th	0.0163537	0.967794
ENSMUSG00000000214	E010	Th	-0.02989	0.861205
ENSMUSG00000000214	E011	Th	-0.455989	0.0210053
ENSMUSG00000000214	E012	Th	-0.223592	0.278772
ENSMUSG00000000214	E013	Th	-0.111445	0.665092
ENSMUSG00000000214	E014	Th	-0.0157922	0.857161
ENSMUSG00000000214	E015	Th	0.138011	0.488822
ENSMUSG00000000214	E016	Th	0.112205	0.45054				0.877517
ENSMUSG00000000214	E017	Th	0.190206	0.421255
ENSMUSG00000000214	E018	Th	0.183013	0.271378
ENSMUSG00000000214	E019	Th	0.160183	0.44712
ENSMUSG00000000214	E020	Th	0.197266	0.53217
ENSMUSG00000000214	E021	Th	0.172582	0.585179
ENSMUSG00000000214	E022	Th
ENSMUSG00000000214	E023	Th
ENSMUSG00000000215	E001	Ins2
ENSMUSG00000000215	E002	Ins2
ENSMUSG00000000215	E003	Ins2
ENSMUSG00000000215	E004	Ins2
ENSMUSG00000000215	E005	Ins2
ENSMUSG00000000215	E006	Ins2
ENSMUSG00000000215	E007	Ins2
ENSMUSG00000000215	E008	Ins2
ENSMUSG00000000215	E009	Ins2
ENSMUSG00000000215	E010	Ins2
ENSMUSG00000000215	E011	Ins2
ENSMUSG00000000215	E012	Ins2
ENSMUSG00000000215	E013	Ins2
ENSMUSG00000000215	E014	Ins2
ENSMUSG00000000215	E015	Ins2
ENSMUSG00000000215	E016	Ins2
ENSMUSG00000000215	E017	Ins2
ENSMUSG00000000215	E018	Ins2
ENSMUSG00000000215	E019	Ins2
ENSMUSG00000000215	E020	Ins2
ENSMUSG00000000216	E001	Scnn1g
ENSMUSG00000000216	E002	Scnn1g
ENSMUSG00000000216	E003	Scnn1g
ENSMUSG00000000216	E004	Scnn1g
ENSMUSG00000000216	E005	Scnn1g
ENSMUSG00000000216	E006	Scnn1g
ENSMUSG00000000216	E007	Scnn1g
ENSMUSG00000000216	E008	Scnn1g
ENSMUSG00000000216	E009	Scnn1g
ENSMUSG00000000216	E010	Scnn1g
ENSMUSG00000000216	E011	Scnn1g
ENSMUSG00000000216	E012	Scnn1g
ENSMUSG00000000216	E013	Scnn1g
ENSMUSG00000000223	E001	Drp2	0.262069	0.544214
ENSMUSG00000000223	E002	Drp2	0.431239	0.121815
ENSMUSG00000000223	E003	Drp2	0.1044	0.806506
ENSMUSG00000000223	E004	Drp2
ENSMUSG00000000223	E005	Drp2	0.366236	0.00390486
ENSMUSG00000000223	E006	Drp2	0.176322	0.158811			0.0784565	0.731414
ENSMUSG00000000223	E007	Drp2
ENSMUSG00000000223	E008	Drp2	0.100105	0.514744			0.038139	0.914646
ENSMUSG00000000223	E009	Drp2	0.199458	0.0483917			0.109152	0.45288
ENSMUSG00000000223	E010	Drp2	1.05584	0.000693544
ENSMUSG00000000223	E011	Drp2	0.121222	0.106868			0.0269211	0.81036			-0.150384	0.385184
ENSMUSG00000000223	E012	Drp2	0.0326779	0.544248			-0.0683656	0.65439			-0.105925	0.484558
ENSMUSG00000000223	E013	Drp2	0.0467073	0.309227			-0.0871787	0.456526			-0.118932	0.373524
ENSMUSG00000000223	E014	Drp2	0.0150656	0.47617			-0.0980922	0.194539	0.043885	0.724013	0.129478	0.0267508
ENSMUSG00000000223	E015	Drp2	-0.0166498	0.889445			-0.075599	0.520895	0.138633	0.119508	0.124808	0.142728
ENSMUSG00000000223	E016	Drp2	0.0840125	0.102164			0.043905	0.667532	0.0956809	0.449331	0.083856	0.40845
ENSMUSG00000000223	E017	Drp2
ENSMUSG00000000223	E018	Drp2	0.138761	0.00897832			0.0395162	0.745198			0.0196362	0.863417
ENSMUSG00000000223	E019	Drp2	0.0458674	0.344688			-0.0478219	0.777909			0.0256311	0.839082
ENSMUSG00000000223	E020	Drp2	0.0764309	0.11754			-0.0753626	0.556983			-0.032859	0.90803
ENSMUSG00000000223	E021	Drp2	0.122846	0.0115323			0.0515504	0.497703	-0.00689132	0.996768	0.0214577	0.799616
ENSMUSG00000000223	E022	Drp2	0.0932203	0.0587151			0.0617867	0.478202	-0.0340242	0.916095	-0.00919027	0.996277
ENSMUSG00000000223	E023	Drp2	-0.183799	0.375843			-0.0902014	0.698077
ENSMUSG00000000223	E024	Drp2	0.0460227	0.243255			0.0513554	0.472168	0.00929013	0.944712	-0.0573325	0.671758
ENSMUSG00000000223	E025	Drp2	0.0358274	0.235204			0.0385043	0.560526	-0.0456841	0.809945	-0.10872	0.238014
ENSMUSG00000000223	E026	Drp2	0.0220871	0.432283			0.0689403	0.262195	-0.012401	0.981156	2.58565e-05	0.951223
ENSMUSG00000000223	E027	Drp2	-0.0587385	0.672243			-0.0248156	0.893013	-0.0172207	0.968265	-0.0218649	0.950695
ENSMUSG00000000223	E028	Drp2	-0.0855401	0.538027			-0.035105	0.87428			-0.044458	0.873752
ENSMUSG00000000223	E029	Drp2	-0.0502738	0.833171			-0.0067449	0.979049			-0.0570856	0.78152
ENSMUSG00000000223	E030	Drp2	0.00332041	0.728262			0.0572771	0.284351	-0.0364938	0.912559	-0.0284883	0.940955
ENSMUSG00000000223	E031	Drp2	-0.0144562	0.925242	-0.0250334	0.999962	0.0429084	0.486901	-0.0265737	0.973545	-0.0116309	0.983358
ENSMUSG00000000223	E032	Drp2	-0.0637825	0.604697			0.0254195	0.66964	-0.025704	0.943878	-0.0532197	0.817637
ENSMUSG00000000223	E033	Drp2	-0.0408541	0.869779			0.0668172	0.371933	-0.0582638	0.767217	-0.080761	0.669124
ENSMUSG00000000223	E034	Drp2	-0.0624964	0.437104	0.00791676	0.999962	0.0484413	0.274508	-0.0147762	0.989259	0.0467173	0.393873
ENSMUSG00000000223	E035	Drp2	-0.125974	0.0194901	0.0400137	0.999962	-0.00149831	0.982157	0.0122346	0.926254	0.103241	0.0721313
ENSMUSG00000000223	E036	Drp2	-0.0238677	0.95331			-0.0184014	0.895141			0.030314	0.85036
ENSMUSG00000000223	E037	Drp2	-0.203991	0.00045496	-0.0159067	0.999962	-0.111632	0.000557396	0.0209917	0.906045	0.0215611	0.843688
ENSMUSG00000000244	E001	Tspan32
ENSMUSG00000000244	E002	Tspan32
ENSMUSG00000000244	E003	Tspan32
ENSMUSG00000000244	E004	Tspan32
ENSMUSG00000000244	E005	Tspan32
ENSMUSG00000000244	E006	Tspan32
ENSMUSG00000000244	E007	Tspan32
ENSMUSG00000000244	E008	Tspan32
ENSMUSG00000000244	E009	Tspan32
ENSMUSG00000000244	E010	Tspan32
ENSMUSG00000000244	E011	Tspan32
ENSMUSG00000000244	E012	Tspan32
ENSMUSG00000000244	E013	Tspan32
ENSMUSG00000000244	E014	Tspan32
ENSMUSG00000000244	E015	Tspan32
ENSMUSG00000000244	E016	Tspan32
ENSMUSG00000000244	E017	Tspan32
ENSMUSG00000000244	E018	Tspan32
ENSMUSG00000000244	E019	Tspan32
ENSMUSG00000000244	E020	Tspan32
ENSMUSG00000000244	E021	Tspan32
ENSMUSG00000000244	E022	Tspan32
ENSMUSG00000000247	E001	Lhx2	-0.822254	0.171502
ENSMUSG00000000247	E002	Lhx2	-0.882397	0.00447736
ENSMUSG00000000247	E003	Lhx2
ENSMUSG00000000247	E004	Lhx2	-0.0846569	0.687902			-0.0745689	0.701032	0.0549912	0.865099	0.0187507	0.946206
ENSMUSG00000000247	E005	Lhx2	0.0696402	0.17303			-0.0300308	0.894372	-0.0604831	0.508094	-0.0598965	0.389878
ENSMUSG00000000247	E006	Lhx2	0.038983	0.936379
ENSMUSG00000000247	E007	Lhx2
ENSMUSG00000000247	E008	Lhx2	-0.0589308	0.389976			-0.131423	0.0110635	-0.00906039	0.934731	0.0211446	0.935012
ENSMUSG00000000247	E009	Lhx2	-0.491871	0.484004
ENSMUSG00000000247	E010	Lhx2	-0.107921	0.769009
ENSMUSG00000000247	E011	Lhx2	0.0463325	0.206873			-0.0341635	0.734067	-0.0435784	0.623802	0.0169817	0.999171
ENSMUSG00000000247	E012	Lhx2	0.0771217	0.0812155			-0.0140826	0.955088	-0.098865	0.08582	-0.00269277	0.945777
ENSMUSG00000000247	E013	Lhx2	0.0515909	0.01681	-0.0186718	0.999962	0.0342847	0.498563	-0.00627745	0.901195	-0.001888	0.888813
ENSMUSG00000000247	E014	Lhx2	0.0905512	0.00211549			0.123777	0.00263909	0.0250951	0.882241	-0.0304924	0.450196
ENSMUSG00000000247	E015	Lhx2	0.0132776	0.393899	0.0156316	0.999962	0.0530597	0.115625	0.0050663	0.98891	-0.00736502	0.751447
ENSMUSG00000000247	E016	Lhx2	-0.0431671	0.778544			0.0431054	0.549696	0.00932337	0.989823	-0.0788867	0.205635
ENSMUSG00000000247	E017	Lhx2	-0.04344	0.322126	0.00157989	0.999962	0.0133197	0.749096	0.0310096	0.460324	0.0307224	0.604119
ENSMUSG00000000247	E018	Lhx2	-0.345879	1.03916e-05			-0.196378	0.00116512	0.130204	0.614293	0.222952	0.149241
ENSMUSG00000000248	E001	Clec2g
ENSMUSG00000000248	E002	Clec2g
ENSMUSG00000000248	E003	Clec2g
ENSMUSG00000000248	E004	Clec2g
ENSMUSG00000000248	E005	Clec2g
ENSMUSG00000000248	E006	Clec2g
ENSMUSG00000000248	E007	Clec2g
ENSMUSG00000000248	E008	Clec2g
ENSMUSG00000000248	E009	Clec2g
ENSMUSG00000000248	E010	Clec2g
ENSMUSG00000000248	E011	Clec2g
ENSMUSG00000000248	E012	Clec2g
ENSMUSG00000000248	E013	Clec2g
ENSMUSG00000000253	E001	Gmpr	0.0755894	0.148743	0.0325553	0.999962	0.0695889	0.138031	0.0121011	0.926101	-0.00180931	0.985321
ENSMUSG00000000253	E002	Gmpr
ENSMUSG00000000253	E003	Gmpr	0.0658657	0.194869	0.016513	0.999962	0.054915	0.292806	-0.00414327	0.989822	-0.127023	0.22914
ENSMUSG00000000253	E004	Gmpr	0.0528449	0.268464	0.0306828	0.999962	0.0466812	0.311499	-0.0102356	0.995997	-0.110757	0.272409
ENSMUSG00000000253	E005	Gmpr	-0.00911523	0.819576	0.0171557	0.999962	-0.0139314	0.661333	-0.0176421	0.977218	0.0490016	0.69202
ENSMUSG00000000253	E006	Gmpr	-0.0286807	0.584258	0.019445	0.999962	-0.00193433	0.924201	-0.00689997	0.989823	0.102287	0.35603
ENSMUSG00000000253	E007	Gmpr	-0.0247534	0.672451	-0.00533637	0.999962	-0.013237	0.780075	0.0186086	0.913337	-0.0154977	0.921782
ENSMUSG00000000253	E008	Gmpr	0.0845174	0.672294			-0.0714287	0.677341
ENSMUSG00000000253	E009	Gmpr	0.00262384	0.984755	-0.0287586	0.999962	-0.0366312	0.486974			-0.0559311	0.739704
ENSMUSG00000000253	E010	Gmpr	0.0228802	0.762755	-0.0110762	0.999962	0.0182978	0.837989			0.0368928	0.861463
ENSMUSG00000000253	E011	Gmpr	-0.0354934	0.539381	-0.0307228	0.999962	-0.0114811	0.952876			0.0234377	0.92649
ENSMUSG00000000253	E012	Gmpr	-0.108515	0.073402			-0.0698442	0.409715
ENSMUSG00000000253	E013	Gmpr	-0.0505162	0.261177	-0.0623928	0.999962	-0.0420932	0.27294	0.0180572	0.900929	0.0499218	0.758462
ENSMUSG00000000263	E001	Glra1
ENSMUSG00000000263	E002	Glra1
ENSMUSG00000000263	E003	Glra1
ENSMUSG00000000263	E004	Glra1
ENSMUSG00000000263	E005	Glra1	-0.0343525	0.835579
ENSMUSG00000000263	E006	Glra1
ENSMUSG00000000263	E007	Glra1	0.0246663	0.863858
ENSMUSG00000000263	E008	Glra1
ENSMUSG00000000263	E009	Glra1
ENSMUSG00000000263	E010	Glra1
ENSMUSG00000000263	E011	Glra1
ENSMUSG00000000263	E012	Glra1
ENSMUSG00000000266	E001	Mid2	0.2065	0.53247
ENSMUSG00000000266	E002	Mid2	0.765806	0.166073
ENSMUSG00000000266	E003	Mid2	0.484583	0.0216124
ENSMUSG00000000266	E004	Mid2	0.394791	0.00144071
ENSMUSG00000000266	E005	Mid2	0.265478	6.79715e-06			0.10515	0.108781	-0.136331	0.747589	-0.183767	0.446816
ENSMUSG00000000266	E006	Mid2	0.286055	0.0129249
ENSMUSG00000000266	E007	Mid2	0.239234	0.00124943			0.0731255	0.619523
ENSMUSG00000000266	E008	Mid2
ENSMUSG00000000266	E009	Mid2	0.161596	0.0673246
ENSMUSG00000000266	E010	Mid2	0.186835	0.00607517			0.102174	0.618563
ENSMUSG00000000266	E011	Mid2	0.1651	0.0214802			0.126701	0.586234
ENSMUSG00000000266	E012	Mid2
ENSMUSG00000000266	E013	Mid2	-0.024763	0.576927			-0.0484175	0.885103
ENSMUSG00000000266	E014	Mid2	-0.0143907	0.516302			-0.0986249	0.593385
ENSMUSG00000000266	E015	Mid2	-0.141391	0.918434
ENSMUSG00000000266	E016	Mid2
ENSMUSG00000000266	E017	Mid2	-0.101804	0.974584
ENSMUSG00000000266	E018	Mid2	-0.0541564	0.754791			-0.0358272	0.915139
ENSMUSG00000000266	E019	Mid2	0.0151892	0.143015			0.00649013	0.912997			-0.0334405	0.986079
ENSMUSG00000000266	E020	Mid2	-0.118222	0.752479			-0.0438717	0.803454	0.0241762	0.85625	0.0798371	0.219623
ENSMUSG00000000266	E021	Mid2	-0.253528	2.94011e-10		0.999962	-0.0452889	0.619805	0.0332465	0.479068	0.0218135	0.197441
ENSMUSG00000000275	E001	Trim25	0.404843	0.000458183
ENSMUSG00000000275	E002	Trim25	0.185434	0.269176
ENSMUSG00000000275	E003	Trim25	0.184897	0.148405
ENSMUSG00000000275	E004	Trim25	-0.0974513	0.859856
ENSMUSG00000000275	E005	Trim25	0.0800635	0.699093
ENSMUSG00000000275	E006	Trim25
ENSMUSG00000000275	E007	Trim25	0.0892241	0.771999
ENSMUSG00000000275	E008	Trim25	-0.019851	0.950153
ENSMUSG00000000275	E009	Trim25	0.0130001	0.882327
ENSMUSG00000000275	E010	Trim25	-0.260367	0.00073693				0.736344				0.255603
ENSMUSG00000000276	E001	Dgke	-0.238008	3.83575e-06	-0.0184125	0.999962	-0.0683165	0.0793064	0.0878637	0.601859	0.0507119	0.639304
ENSMUSG00000000276	E002	Dgke	-0.129383	0.0885426	0.0226949	0.999962	-0.0818332	0.0765204	0.0404135	0.869857	0.0407822	0.755637
ENSMUSG00000000276	E003	Dgke	-0.0633698	0.0781324	-0.00450625	0.999962	-0.0562986	0.0191907	-0.00534744	0.86136	-0.00826039	0.916209
ENSMUSG00000000276	E004	Dgke	0.0350401	0.437063			-0.0424227	0.751683	-0.0310106	0.857077	-0.0504973	0.730451
ENSMUSG00000000276	E005	Dgke	0.0693982	0.311077			-0.00368596	0.979833	-0.0286834	0.882803	-0.0574535	0.74859
ENSMUSG00000000276	E006	Dgke	0.0661827	0.281956			0.00486342	0.969671	-0.0167884	0.923467	-0.0399819	0.854045
ENSMUSG00000000276	E007	Dgke	-0.0196376	0.961053			-0.00754604	0.97598			0.0725969	0.678904
ENSMUSG00000000276	E008	Dgke	-0.128235	0.984569
ENSMUSG00000000276	E009	Dgke	0.0632815	0.250053			0.0534635	0.693835			0.0157856	0.96566
ENSMUSG00000000276	E010	Dgke	0.0459553	0.46245			0.0567762	0.767128			0.0357026	0.893361
ENSMUSG00000000276	E011	Dgke	-0.0117317	0.888795			0.0429643	0.823098	0.0457887	0.91527	0.0774431	0.543521
ENSMUSG00000000276	E012	Dgke	0.0784849	0.1704			0.151185	0.132046	-0.0150649	0.895183	0.0659171	0.567376
ENSMUSG00000000276	E013	Dgke	0.051592	0.35114			0.0851367	0.367938	0.00576154	0.97969	0.01197	0.973104
ENSMUSG00000000276	E014	Dgke	0.220276	1.82238e-06			0.21478	0.000358134	-0.0177404	0.885096	-0.113174	0.436569
ENSMUSG00000000276	E015	Dgke	0.33063	6.47392e-07			0.299818	0.000219375	-0.0445133	0.822173	-0.125567	0.573663
ENSMUSG00000000276	E016	Dgke	0.134244	0.859734
ENSMUSG00000000276	E017	Dgke
ENSMUSG00000000278	E001	Scpep1	-0.113496	0.132075			-0.0911189	0.374107			0.00241789	0.956351
ENSMUSG00000000278	E002	Scpep1	-0.206767	0.0106641			-0.078836	0.444916
ENSMUSG00000000278	E003	Scpep1	-0.163999	0.106534			-0.057738	0.692973
ENSMUSG00000000278	E004	Scpep1	-0.14717	0.0965128			-0.128252	0.201583
ENSMUSG00000000278	E005	Scpep1	-0.0185226	0.917689			-0.0246912	0.876057
ENSMUSG00000000278	E006	Scpep1	-0.289916	0.263796
ENSMUSG00000000278	E007	Scpep1	0.0928155	0.834988
ENSMUSG00000000278	E008	Scpep1	0.233595	0.0543615
ENSMUSG00000000278	E009	Scpep1	0.114457	0.378248			0.111144	0.56122
ENSMUSG00000000278	E010	Scpep1	0.101427	0.20413			0.0261548	0.91834			0.0388038	0.79039
ENSMUSG00000000278	E011	Scpep1	0.119338	0.154512			0.133608	0.252215
ENSMUSG00000000278	E012	Scpep1	0.109328	0.192308			0.072112	0.617475			-0.0452509	0.887349
ENSMUSG00000000278	E013	Scpep1	0.109709	0.23338			0.0531001	0.78378
ENSMUSG00000000282	E001	Mnt	-0.0100888	0.86192			0.0376355	0.918146			0.199117	0.501649
ENSMUSG00000000282	E002	Mnt
ENSMUSG00000000282	E003	Mnt	0.171265	5.22565e-07			0.0459431	0.600331	-0.00840939	0.896059	-0.00550569	0.958061
ENSMUSG00000000282	E004	Mnt	0.151372	0.0788309			0.0711119	0.800494			0.0535002	0.767594
ENSMUSG00000000282	E005	Mnt	0.215475	0.057889			0.105351	0.656518			0.0250693	0.907133
ENSMUSG00000000282	E006	Mnt	0.192924	8.15221e-05			0.131023	0.153006	-0.0656992	0.563723	-0.0282755	0.871242
ENSMUSG00000000282	E007	Mnt	0.140178	0.00154097			0.0843867	0.272029	-0.0355844	0.755367	-0.163479	0.0291793
ENSMUSG00000000282	E008	Mnt	0.103139	0.19846			0.0829369	0.475329
ENSMUSG00000000282	E009	Mnt	-0.0166059	0.957218	0.0234089	0.999962	0.0759963	0.0761516	0.0457487	0.75397	0.0351454	0.706356
ENSMUSG00000000282	E010	Mnt	-0.187918	6.38795e-05			-0.122231	0.0425052	-0.0026108	0.956302	-0.0237594	0.890686
ENSMUSG00000000282	E011	Mnt	-0.226618	7.4728e-14	-0.0239282	0.999962	-0.130057	7.97642e-05	0.0189948	0.997889	0.0440707	0.772832
ENSMUSG00000000290	E001	Itgb2
ENSMUSG00000000290	E002	Itgb2
ENSMUSG00000000290	E003	Itgb2	0.263555	0.802674
ENSMUSG00000000290	E004	Itgb2	0.38805	0.672932
ENSMUSG00000000290	E005	Itgb2	0.408698	0.304128
ENSMUSG00000000290	E006	Itgb2	0.464069	0.0505099
ENSMUSG00000000290	E007	Itgb2	0.389313	0.104133
ENSMUSG00000000290	E008	Itgb2
ENSMUSG00000000290	E009	Itgb2	0.0740995	0.729628
ENSMUSG00000000290	E010	Itgb2	0.039902	0.880964
ENSMUSG00000000290	E011	Itgb2	0.129671	0.499051
ENSMUSG00000000290	E012	Itgb2	0.0169165	0.948282
ENSMUSG00000000290	E013	Itgb2	-0.144271	0.384181
ENSMUSG00000000290	E014	Itgb2	0.0816936	0.698463
ENSMUSG00000000290	E015	Itgb2	0.0303524	0.911859
ENSMUSG00000000290	E016	Itgb2	-0.0598462	0.798893
ENSMUSG00000000290	E017	Itgb2	-0.110934	0.57994
ENSMUSG00000000290	E018	Itgb2	-0.141704	0.357646
ENSMUSG00000000290	E019	Itgb2	-0.166196	0.240355
ENSMUSG00000000290	E020	Itgb2	-0.149738	0.423795
ENSMUSG00000000290	E021	Itgb2	-0.0655848	0.790114
ENSMUSG00000000290	E022	Itgb2	0.115377	0.710633
ENSMUSG00000000290	E023	Itgb2	-0.183441	0.481623
ENSMUSG00000000290	E024	Itgb2
ENSMUSG00000000290	E025	Itgb2
ENSMUSG00000000295	E001	Hddc2	0.0765714	0.84053
ENSMUSG00000000295	E002	Hddc2	0.11109	0.725281
ENSMUSG00000000295	E003	Hddc2	-0.0125621	0.937974			-0.0800893	0.717836
ENSMUSG00000000295	E004	Hddc2	-0.0206653	0.922107			-0.0020111	0.969652
ENSMUSG00000000295	E005	Hddc2	0.137279	0.828594
ENSMUSG00000000295	E006	Hddc2	-0.0299449	0.850956			0.0259046	0.895141
ENSMUSG00000000295	E007	Hddc2	-0.0186657	0.922452			0.0445291	0.798062
ENSMUSG00000000295	E008	Hddc2
ENSMUSG00000000295	E009	Hddc2	-0.347681	0.581719
ENSMUSG00000000295	E010	Hddc2
ENSMUSG00000000295	E011	Hddc2	0.019159	0.917235			0.0145256	0.933869
ENSMUSG00000000295	E012	Hddc2
ENSMUSG00000000295	E013	Hddc2	-0.0114808	0.933989			-0.0255062	0.877776
ENSMUSG00000000295	E014	Hddc2	0.0361128	0.846445			-0.0218855	0.879844
ENSMUSG00000000295	E015	Hddc2
ENSMUSG00000000295	E016	Hddc2
ENSMUSG00000000296	E001	Tpd52l1	-0.0533424	0.760268			-0.0841134	0.68878
ENSMUSG00000000296	E002	Tpd52l1	-0.168807	0.166569			-0.122501	0.416106
ENSMUSG00000000296	E003	Tpd52l1	-0.200157	0.534808			-0.0786662	0.832008
ENSMUSG00000000296	E004	Tpd52l1	0.097433	0.183779			0.0615478	0.613185
ENSMUSG00000000296	E005	Tpd52l1	-0.0289524	0.762966			-0.0265856	0.974266				0.752283
ENSMUSG00000000296	E006	Tpd52l1	0.0513789	0.538677			0.0760558	0.363344
ENSMUSG00000000296	E007	Tpd52l1	0.0384817	0.650334			0.0129521	0.991289
ENSMUSG00000000301	E001	Pemt	0.008969	0.99304
ENSMUSG00000000301	E002	Pemt	-0.0844379	0.935652
ENSMUSG00000000301	E003	Pemt	-0.188909	0.846237
ENSMUSG00000000301	E004	Pemt	-0.0793627	0.939132
ENSMUSG00000000301	E005	Pemt
ENSMUSG00000000301	E006	Pemt	-0.0723914	0.850944
ENSMUSG00000000301	E007	Pemt	-0.0445916	0.942024
ENSMUSG00000000301	E008	Pemt	-0.0793286	0.855495
ENSMUSG00000000301	E009	Pemt	-0.300296	0.412693
ENSMUSG00000000301	E010	Pemt	-0.117507	0.690119
ENSMUSG00000000301	E011	Pemt	0.262112	0.360483
ENSMUSG00000000301	E012	Pemt
ENSMUSG00000000301	E013	Pemt
ENSMUSG00000000301	E014	Pemt
ENSMUSG00000000301	E015	Pemt	1.29022	0.00919848
ENSMUSG00000000301	E016	Pemt
ENSMUSG00000000301	E017	Pemt
ENSMUSG00000000301	E018	Pemt
ENSMUSG00000000301	E019	Pemt
ENSMUSG00000000301	E020	Pemt
ENSMUSG00000000301	E021	Pemt	0.111196	0.916331
ENSMUSG00000000301	E022	Pemt	-0.0738433	0.939622
ENSMUSG00000000301	E023	Pemt	0.0458618	0.921424
ENSMUSG00000000301	E024	Pemt	0.0458618	0.921424
ENSMUSG00000000303	E001	Cdh1
ENSMUSG00000000303	E002	Cdh1	0.201314	0.779775
ENSMUSG00000000303	E003	Cdh1
ENSMUSG00000000303	E004	Cdh1	0.14679	0.835692
ENSMUSG00000000303	E005	Cdh1	0.113591	0.815287
ENSMUSG00000000303	E006	Cdh1	0.321794	0.637358
ENSMUSG00000000303	E007	Cdh1	0.430716	0.362617
ENSMUSG00000000303	E008	Cdh1	0.733211	0.339003
ENSMUSG00000000303	E009	Cdh1	0.530329	0.218742
ENSMUSG00000000303	E010	Cdh1	-0.0797434	0.891135
ENSMUSG00000000303	E011	Cdh1	-0.137613	0.847217
ENSMUSG00000000303	E012	Cdh1	0.211774	0.742277
ENSMUSG00000000303	E013	Cdh1	0.474802	0.251593
ENSMUSG00000000303	E014	Cdh1	0.256669	0.613728
ENSMUSG00000000303	E015	Cdh1	-0.101733	0.852466
ENSMUSG00000000303	E016	Cdh1	-0.127209	0.793204
ENSMUSG00000000303	E017	Cdh1	-0.239221	0.653837
ENSMUSG00000000303	E018	Cdh1	-0.227459	0.452683
ENSMUSG00000000303	E019	Cdh1	-0.383103	0.26691
ENSMUSG00000000303	E020	Cdh1	-0.335456	0.562603
ENSMUSG00000000303	E021	Cdh1	-0.456107	0.0977867
ENSMUSG00000000305	E001	Cdh4	-0.0149589	0.883552
ENSMUSG00000000305	E002	Cdh4	0.110078	0.537832
ENSMUSG00000000305	E003	Cdh4
ENSMUSG00000000305	E004	Cdh4	-0.0455051	0.948719
ENSMUSG00000000305	E005	Cdh4
ENSMUSG00000000305	E006	Cdh4	-0.18073	0.542953
ENSMUSG00000000305	E007	Cdh4	-0.035066	0.892357
ENSMUSG00000000305	E008	Cdh4	-0.0585628	0.986063
ENSMUSG00000000305	E009	Cdh4	-0.0191984	0.835399
ENSMUSG00000000305	E010	Cdh4	0.0047085	0.558131			-0.0924054	0.667927			0.0875837	0.456734
ENSMUSG00000000305	E011	Cdh4	0.0570776	0.160253			-0.00866172	0.986485	0.0522411	0.883834	0.0709155	0.557763
ENSMUSG00000000305	E012	Cdh4
ENSMUSG00000000305	E013	Cdh4	0.126708	0.00869535			0.0722225	0.514727	0.000785788	0.959505	-0.017909	0.90074
ENSMUSG00000000305	E014	Cdh4	0.145133	0.00208514			0.036637	0.697144	-0.0404547	0.793444	0.00921784	0.937671
ENSMUSG00000000305	E015	Cdh4	0.102574	0.0155399			0.057899	0.522178	-0.013118	0.938611	-0.0540127	0.696787
ENSMUSG00000000305	E016	Cdh4	0.200991	0.000128205			0.214391	0.00937883	0.0128154	0.976872	0.0282967	0.85829
ENSMUSG00000000305	E017	Cdh4	0.0081555	0.609453			0.047893	0.680199			0.026543	0.886267
ENSMUSG00000000305	E018	Cdh4	-0.000830136	0.639668			-0.00598273	0.964307	-0.0138661	0.962525	0.06875	0.623354
ENSMUSG00000000305	E019	Cdh4	-0.0579231	0.981624			-0.0540754	0.841403	-0.0181547	0.934355	-0.0742438	0.620273
ENSMUSG00000000305	E020	Cdh4	-0.0343392	0.827043			0.0311005	0.746615			-0.0667867	0.686912
ENSMUSG00000000305	E021	Cdh4
ENSMUSG00000000305	E022	Cdh4
ENSMUSG00000000305	E023	Cdh4	0.0161575	0.464489			0.102945	0.322821			-0.06748	0.699317
ENSMUSG00000000305	E024	Cdh4	0.00707649	0.511973			0.113026	0.15103	-0.074601	0.778531	-0.0590021	0.754279
ENSMUSG00000000305	E025	Cdh4	-0.285286	3.45266e-07		0.999962	-0.116702	0.00247382	0.072237	0.788998	0.030754	0.891469
ENSMUSG00000000308	E001	Ckmt1
ENSMUSG00000000308	E002	Ckmt1	0.158609	0.770281
ENSMUSG00000000308	E003	Ckmt1	0.245138	0.559282
ENSMUSG00000000308	E004	Ckmt1	0.978495	0.0475124
ENSMUSG00000000308	E005	Ckmt1	0.32344	0.25934
ENSMUSG00000000308	E006	Ckmt1	0.13588	0.563062			0.0968304	0.425167			-0.00886434	0.964703
ENSMUSG00000000308	E007	Ckmt1	0.136077	0.48858			0.0827789	0.477064			-0.0181138	0.981989
ENSMUSG00000000308	E008	Ckmt1	0.128372	0.531764	-0.0302882	0.999962	0.0697116	0.57683			-0.0145737	0.971767
ENSMUSG00000000308	E009	Ckmt1	0.0923906	0.752225	0.0016841	0.999962	0.0500413	0.730258	-0.0765316	0.936039	0.00198086	0.940384
ENSMUSG00000000308	E010	Ckmt1	0.0569598	0.855079	-0.0269637	0.999962	-0.00280007	0.964784	-0.0388557	0.968019	0.0416066	0.879528
ENSMUSG00000000308	E011	Ckmt1	0.0522184	0.824567	-0.0365099	0.999962	0.0238905	0.90858	-0.0379161	0.949647	0.0161996	0.962816
ENSMUSG00000000308	E012	Ckmt1	0.0673286	0.416616	-0.0455458	0.999962	0.0668459	0.275788	-0.0558961	0.865895	-0.0248358	0.903073
ENSMUSG00000000308	E013	Ckmt1	0.0199549	0.779969	-0.0215709	0.999962	0.0385168	0.147257	-0.0472936	0.691501	-0.0352627	0.755895
ENSMUSG00000000308	E014	Ckmt1	-0.149454	0.824509
ENSMUSG00000000308	E015	Ckmt1	-0.170911	0.881315
ENSMUSG00000000308	E016	Ckmt1	0.0288338	0.369513	0.0118101	0.999962	0.00724336	0.851585	-0.024227	0.844395	0.00634354	0.906569
ENSMUSG00000000308	E017	Ckmt1	0.0206702	0.647136	0.00556082	0.999962	0.00659748	0.846063	-0.0126047	0.959931	-0.00886441	0.972722
ENSMUSG00000000308	E018	Ckmt1	-0.0071583	0.879639	-0.00392314	0.999962	-0.0106788	0.959482	0.00762773	0.986817	0.0375239	0.796727
ENSMUSG00000000308	E019	Ckmt1	0.231667	0.634949
ENSMUSG00000000308	E020	Ckmt1	-0.00633073	0.931703	0.0104517	0.999962	-0.0302596	0.353341	-0.0256641	0.864718	-0.0103449	0.895108
ENSMUSG00000000308	E021	Ckmt1	0.00197429	0.947683	0.0107468	0.999962	-0.0218351	0.13873	-0.0162468	0.913273	-0.00872502	0.903509
ENSMUSG00000000308	E022	Ckmt1	0.0165921	0.625613	0.0105081	0.999962	-0.0134068	0.501759	0.000727203	0.954455	-0.00067046	0.995235
ENSMUSG00000000308	E023	Ckmt1	0.0155605	0.915323	-0.00235202	0.999962	0.00784658	0.901164	0.00312002	0.893306	0.0303048	0.860796
ENSMUSG00000000308	E024	Ckmt1	-0.0194764	0.360262	-0.0063223	0.999962	-0.0138338	0.306074	-0.0285156	0.902284	0.0147888	0.946072
ENSMUSG00000000308	E025	Ckmt1	-0.0251408	0.158853	0.000622526	0.999962	-0.00584296	0.546296	0.0330751	0.709268	0.016351	0.876653
ENSMUSG00000000308	E026	Ckmt1	-0.0540237	0.00998878	0.000799466	0.999962	-0.0156185	0.85461	0.0759479	0.101023	-0.00528667	0.961309
ENSMUSG00000000308	E027	Ckmt1
ENSMUSG00000000308	E028	Ckmt1	-0.0820485	0.00619291	-0.00148294	0.999962	-0.025931	0.794936	0.0530124	0.622832	-0.0359052	0.782489
ENSMUSG00000000308	E029	Ckmt1	-0.0935019	8.52899e-05	-0.00728173	0.999962	0.00330539	0.80033	0.0822291	0.505587	-0.00660228	0.968714
ENSMUSG00000000308	E030	Ckmt1
ENSMUSG00000000317	E001	Bcl6b	-0.105207	0.416734
ENSMUSG00000000317	E002	Bcl6b	-0.104147	0.744931
ENSMUSG00000000317	E003	Bcl6b
ENSMUSG00000000317	E004	Bcl6b	0.154677	0.95112
ENSMUSG00000000317	E005	Bcl6b	-0.113224	0.719576
ENSMUSG00000000317	E006	Bcl6b	0.333122	0.72873
ENSMUSG00000000317	E007	Bcl6b
ENSMUSG00000000317	E008	Bcl6b
ENSMUSG00000000317	E009	Bcl6b
ENSMUSG00000000317	E010	Bcl6b
ENSMUSG00000000317	E011	Bcl6b
ENSMUSG00000000317	E012	Bcl6b
ENSMUSG00000000317	E013	Bcl6b
ENSMUSG00000000317	E014	Bcl6b
ENSMUSG00000000318	E001	Clec10a
ENSMUSG00000000318	E002	Clec10a
ENSMUSG00000000318	E003	Clec10a
ENSMUSG00000000318	E004	Clec10a
ENSMUSG00000000318	E005	Clec10a
ENSMUSG00000000318	E006	Clec10a
ENSMUSG00000000318	E007	Clec10a
ENSMUSG00000000318	E008	Clec10a
ENSMUSG00000000318	E009	Clec10a
ENSMUSG00000000318	E010	Clec10a
ENSMUSG00000000318	E011	Clec10a
ENSMUSG00000000318	E012	Clec10a	-0.0913077	0.931445
ENSMUSG00000000318	E013	Clec10a
ENSMUSG00000000318	E014	Clec10a	0.724799	0.183776
ENSMUSG00000000318	E015	Clec10a	-0.0740558	0.940568
ENSMUSG00000000318	E016	Clec10a	-0.00319331	0.986152
ENSMUSG00000000318	E017	Clec10a	-0.177206	0.772863
ENSMUSG00000000318	E018	Clec10a	-0.232948	0.741027
ENSMUSG00000000318	E019	Clec10a	0.0585733	0.90362
ENSMUSG00000000318	E020	Clec10a
ENSMUSG00000000318	E021	Clec10a	-0.374012	0.354289
ENSMUSG00000000318	E022	Clec10a
ENSMUSG00000000318	E023	Clec10a	-0.503881	0.418924
ENSMUSG00000000318	E024	Clec10a
ENSMUSG00000000318	E025	Clec10a	0.0840024	0.898848
ENSMUSG00000000318	E026	Clec10a	0.565954	0.30441
ENSMUSG00000000318	E027	Clec10a
ENSMUSG00000000318	E028	Clec10a
ENSMUSG00000000318	E029	Clec10a	0.725163	0.185143
ENSMUSG00000000318	E030	Clec10a
ENSMUSG00000000318	E031	Clec10a
ENSMUSG00000000318	E032	Clec10a
ENSMUSG00000000320	E001	Alox12
ENSMUSG00000000320	E002	Alox12
ENSMUSG00000000320	E003	Alox12
ENSMUSG00000000320	E004	Alox12
ENSMUSG00000000320	E005	Alox12
ENSMUSG00000000320	E006	Alox12
ENSMUSG00000000320	E007	Alox12
ENSMUSG00000000320	E008	Alox12
ENSMUSG00000000320	E009	Alox12
ENSMUSG00000000320	E010	Alox12
ENSMUSG00000000320	E011	Alox12
ENSMUSG00000000320	E012	Alox12
ENSMUSG00000000320	E013	Alox12
ENSMUSG00000000320	E014	Alox12
ENSMUSG00000000320	E015	Alox12
ENSMUSG00000000320	E016	Alox12
ENSMUSG00000000325	E001	Arvcf	0.0723475	0.788191
ENSMUSG00000000325	E002	Arvcf	-0.00104776	0.967335			0.0237815	0.932187
ENSMUSG00000000325	E003	Arvcf	0.232799	0.183817
ENSMUSG00000000325	E004	Arvcf
ENSMUSG00000000325	E005	Arvcf	0.10431	0.366805			0.0776085	0.562092
ENSMUSG00000000325	E006	Arvcf
ENSMUSG00000000325	E007	Arvcf	0.52516	0.0885426
ENSMUSG00000000325	E008	Arvcf	0.102571	0.483108			0.0151071	0.946592
ENSMUSG00000000325	E009	Arvcf	0.0558456	0.670447			-0.0410706	0.814267
ENSMUSG00000000325	E010	Arvcf	0.0747638	0.291947			-0.0478468	0.629466	0.000783557	0.7563	-0.00772604	0.973642
ENSMUSG00000000325	E011	Arvcf	0.14971	0.0551492			0.0516462	0.607459	0.00250718	0.786524	0.0450886	0.823872
ENSMUSG00000000325	E012	Arvcf	0.0456357	0.725945			0.0254649	0.87958
ENSMUSG00000000325	E013	Arvcf	0.132816	0.0293041			0.0872892	0.243934	-0.00313967	0.798715	0.0996432	0.338695
ENSMUSG00000000325	E014	Arvcf	0.122949	0.270475			0.0597343	0.70267
ENSMUSG00000000325	E015	Arvcf	0.0406598	0.7486			0.0686737	0.57206
ENSMUSG00000000325	E016	Arvcf	0.0371202	0.764008			0.0790607	0.474358
ENSMUSG00000000325	E017	Arvcf	0.0979972	0.249528			0.0671591	0.482073			-0.0622331	0.793133
ENSMUSG00000000325	E018	Arvcf	0.0971969	0.338684			0.0854981	0.331254			0.0204417	0.913875
ENSMUSG00000000325	E019	Arvcf	-0.00859146	0.935548			0.0399408	0.804622			0.00927901	0.919146
ENSMUSG00000000325	E020	Arvcf	0.719881	0.0979865
ENSMUSG00000000325	E021	Arvcf	-0.124197	0.379849			0.0107101	0.97127
ENSMUSG00000000325	E022	Arvcf
ENSMUSG00000000325	E023	Arvcf	-0.0104899	0.932267			0.0532137	0.624752			0.00783059	0.928731
ENSMUSG00000000325	E024	Arvcf	0.013208	0.915118			0.00598869	0.967233			-0.0897975	0.65141
ENSMUSG00000000325	E025	Arvcf	-0.0204575	0.822639			-0.0122359	0.927265			-0.0427383	0.895447
ENSMUSG00000000325	E026	Arvcf	-0.0693826	0.502552			-0.0434706	0.730207			-0.0641605	0.82425
ENSMUSG00000000325	E027	Arvcf	-0.050521	0.761094			-0.0618704	0.730587
ENSMUSG00000000325	E028	Arvcf	-0.0469366	0.687644			-0.0636344	0.64243
ENSMUSG00000000325	E029	Arvcf
ENSMUSG00000000325	E030	Arvcf	-0.11421	0.165378			-0.0533242	0.675676
ENSMUSG00000000325	E031	Arvcf	-0.106054	0.210647			-0.0152484	0.938866
ENSMUSG00000000325	E032	Arvcf	0.250033	0.677982
ENSMUSG00000000325	E033	Arvcf	-0.173987	0.0446035			-0.0819549	0.469162
ENSMUSG00000000325	E034	Arvcf
ENSMUSG00000000325	E035	Arvcf	-0.21489	0.00410942			-0.109541	0.317685
ENSMUSG00000000325	E036	Arvcf	-0.220832	0.0134304			-0.107542	0.287119
ENSMUSG00000000325	E037	Arvcf	0.358331	0.399509
ENSMUSG00000000325	E038	Arvcf	-0.17994	0.106675			-0.0939101	0.186951			0.0538929	0.860815
ENSMUSG00000000325	E039	Arvcf	-0.086256	0.657493
ENSMUSG00000000325	E040	Arvcf	-0.370654	0.56151
ENSMUSG00000000325	E041	Arvcf
ENSMUSG00000000326	E001	Comt	-0.190949	0.0122872			-0.167239	0.213041			0.0241193	0.862112
ENSMUSG00000000326	E002	Comt	-0.163263	0.538365
ENSMUSG00000000326	E003	Comt	-0.0597906	0.0118715	-0.0055714	0.999962	-0.0373252	0.445917	0.014422	0.830696	-0.000373407	0.926744
ENSMUSG00000000326	E004	Comt	-0.0588289	0.112427	0.00486464	0.999962	-0.0340421	0.591315	0.0114509	0.899343	0.0563002	0.351975
ENSMUSG00000000326	E005	Comt	-0.00512713	0.921391	0.00782378	0.999962	-0.00838597	0.999883	-0.000832308	0.967196	0.00715143	0.873752
ENSMUSG00000000326	E006	Comt	0.007638	0.86094	-0.0108836	0.999962	0.018105	0.601959	-0.00969866	0.996441	-0.0139362	0.978553
ENSMUSG00000000326	E007	Comt	0.083257	0.00525371	0.0126209	0.999962	0.0577578	0.088606	-0.0156502	0.975574	-0.0253241	0.89668
ENSMUSG00000000326	E008	Comt	-0.00877985	0.985249
ENSMUSG00000000326	E009	Comt	0.25705	0.00011904			0.0791798	0.375317			-0.0418006	0.89809
ENSMUSG00000000326	E010	Comt	0.179221	0.0540961			0.0266785	0.881056
ENSMUSG00000000326	E011	Comt	0.0862694	0.866435
ENSMUSG00000000339	E001	Rtca
ENSMUSG00000000339	E002	Rtca
ENSMUSG00000000339	E003	Rtca
ENSMUSG00000000339	E004	Rtca	-0.114095	0.251549			-0.11814	0.210022
ENSMUSG00000000339	E005	Rtca	-0.106288	0.24878			-0.0753703	0.420357
ENSMUSG00000000339	E006	Rtca	-0.0967069	0.208308			-0.0638857	0.385692
ENSMUSG00000000339	E007	Rtca	-0.121899	0.522495			-0.057278	0.712499
ENSMUSG00000000339	E008	Rtca
ENSMUSG00000000339	E009	Rtca	-0.0900994	0.150894			-0.0568077	0.454111			0.0731833	0.769493
ENSMUSG00000000339	E010	Rtca	-0.0640782	0.132512	-0.0608286	0.999962	-0.0521992	0.274873	0.00525039	0.909106	0.0516269	0.671215
ENSMUSG00000000339	E011	Rtca	-0.0304197	0.551435			-0.0119101	0.781482			-0.0390926	0.873122
ENSMUSG00000000339	E012	Rtca	0.015376	0.943724	0.026773	0.999962	-0.0122446	0.775515			-0.0382703	0.853386
ENSMUSG00000000339	E013	Rtca	0.0412508	0.738402			0.0113911	0.991444
ENSMUSG00000000339	E014	Rtca	0.0492727	0.518396	0.0418797	0.999962	0.0474244	0.526645	-0.00558323	0.968077	-0.0240149	0.909541
ENSMUSG00000000339	E015	Rtca	0.17808	0.716094
ENSMUSG00000000339	E016	Rtca	0.157712	0.03805			0.211532	0.000570174
ENSMUSG00000000339	E017	Rtca	0.195406	0.0574298			0.105504	0.469091
ENSMUSG00000000339	E018	Rtca	0.163065	0.307631			0.040258	0.900527
ENSMUSG00000000339	E019	Rtca	0.0670241	0.857063			0.145065	0.623262
ENSMUSG00000000339	E020	Rtca	0.264567	0.75732
ENSMUSG00000000340	E001	Dbt	0.135421	0.167791							-0.0187055	0.883791
ENSMUSG00000000340	E002	Dbt	0.101622	0.370735							0.0299509	0.899105
ENSMUSG00000000340	E003	Dbt	-0.0111256	0.955837							0.0364086	0.905414
ENSMUSG00000000340	E004	Dbt	0.130698	0.0466528			0.065609	0.61265	0.0354114	0.895391	0.00497629	0.984607
ENSMUSG00000000340	E005	Dbt	0.14527	0.0107078			0.16159	0.0675479	0.0396191	0.845734	0.0325339	0.830872
ENSMUSG00000000340	E006	Dbt	0.0813655	0.0730061			0.0336165	0.753534	-0.00100288	0.964781	-0.0371382	0.513142
ENSMUSG00000000340	E007	Dbt	-0.0206292	0.993529			-0.0360042	0.900199	-0.0224187	0.845734	-0.000340072	0.941358
ENSMUSG00000000340	E008	Dbt	0.000845437	0.850193			-0.0172053	0.99899	-0.0174687	0.918234	-0.0160966	0.859341
ENSMUSG00000000340	E009	Dbt	-0.00780909	0.899235			-0.00839638	0.967868	-0.0464869	0.693108	-0.0123247	0.863471
ENSMUSG00000000340	E010	Dbt	-0.0866644	0.579374			-0.126129	0.497889			-0.0389012	0.748172
ENSMUSG00000000340	E011	Dbt	-0.230354	4.37931e-07			-0.089743	0.578805	0.0184999	0.864968	0.0415913	0.646082
ENSMUSG00000000346	E001	Dazap2	0.137948	0.000539254	0.0320572	0.999962	0.0220538	0.698216	-0.017654	0.874639	0.000520312	0.610595
ENSMUSG00000000346	E002	Dazap2	0.0718883	0.00620147	0.0162148	0.999962	0.00612309	0.918117	-0.00225171	0.931557	0.00824431	0.653714
ENSMUSG00000000346	E003	Dazap2	-0.000444774	0.143165	-0.00324696	0.999962	0.0211377	0.510936	-0.00752201	0.635156	-0.0246877	2.57322e-05
ENSMUSG00000000346	E004	Dazap2	-0.0953483	3.56018e-05	-0.0133627	0.999962	-0.0141392	0.330488	0.0319132	0.784501	0.102922	0.144707
ENSMUSG00000000355	E001	Mcts1	0.280616	0.187438
ENSMUSG00000000355	E002	Mcts1	0.0567837	0.34651			0.00120793	0.969923			0.0924999	0.499112
ENSMUSG00000000355	E003	Mcts1	-0.040841	0.797643			0.0905375	0.310583
ENSMUSG00000000355	E004	Mcts1	-0.00627669	0.985632	0.00300025	0.999962	0.0271809	0.768241			-0.0493497	0.748036
ENSMUSG00000000355	E005	Mcts1	-0.0398703	0.719338	0.0444895	0.999962	0.0358666	0.796753			-0.0555984	0.793458
ENSMUSG00000000355	E006	Mcts1	-0.0416087	0.583425	-0.0169183	0.999962	-0.0337131	0.475217			0.0162222	0.909259
ENSMUSG00000000355	E007	Mcts1	0.320921	0.102735
ENSMUSG00000000355	E008	Mcts1	0.391104	0.200164
ENSMUSG00000000355	E009	Mcts1	0.558516	0.0384329
ENSMUSG00000000355	E010	Mcts1	0.385352	0.296625
ENSMUSG00000000355	E011	Mcts1	-0.040817	0.705544			-0.0113291	0.884936			0.0437766	0.823989
ENSMUSG00000000355	E012	Mcts1	-0.0445608	0.662224			-0.000331408	0.961683			-0.0460444	0.860131
ENSMUSG00000000355	E013	Mcts1	-0.0488708	0.834909			-0.204664	0.0734706
ENSMUSG00000000359	E001	Rem1
ENSMUSG00000000359	E002	Rem1
ENSMUSG00000000359	E003	Rem1
ENSMUSG00000000359	E004	Rem1
ENSMUSG00000000359	E005	Rem1
ENSMUSG00000000359	E006	Rem1
ENSMUSG00000000359	E007	Rem1
ENSMUSG00000000359	E008	Rem1
ENSMUSG00000000359	E009	Rem1
ENSMUSG00000000359	E010	Rem1
ENSMUSG00000000365	E001	Rnf17
ENSMUSG00000000365	E002	Rnf17
ENSMUSG00000000365	E003	Rnf17
ENSMUSG00000000365	E004	Rnf17
ENSMUSG00000000365	E005	Rnf17
ENSMUSG00000000365	E006	Rnf17
ENSMUSG00000000365	E007	Rnf17
ENSMUSG00000000365	E008	Rnf17
ENSMUSG00000000365	E009	Rnf17
ENSMUSG00000000365	E010	Rnf17
ENSMUSG00000000365	E011	Rnf17
ENSMUSG00000000365	E012	Rnf17
ENSMUSG00000000365	E013	Rnf17
ENSMUSG00000000365	E014	Rnf17
ENSMUSG00000000365	E015	Rnf17
ENSMUSG00000000365	E016	Rnf17
ENSMUSG00000000365	E017	Rnf17
ENSMUSG00000000365	E018	Rnf17
ENSMUSG00000000365	E019	Rnf17
ENSMUSG00000000365	E020	Rnf17
ENSMUSG00000000365	E021	Rnf17		0.679336
ENSMUSG00000000365	E022	Rnf17
ENSMUSG00000000365	E023	Rnf17
ENSMUSG00000000365	E024	Rnf17
ENSMUSG00000000365	E025	Rnf17
ENSMUSG00000000365	E026	Rnf17
ENSMUSG00000000365	E027	Rnf17
ENSMUSG00000000365	E028	Rnf17
ENSMUSG00000000365	E029	Rnf17
ENSMUSG00000000365	E030	Rnf17
ENSMUSG00000000365	E031	Rnf17
ENSMUSG00000000365	E032	Rnf17
ENSMUSG00000000365	E033	Rnf17
ENSMUSG00000000365	E034	Rnf17
ENSMUSG00000000365	E035	Rnf17
ENSMUSG00000000365	E036	Rnf17
ENSMUSG00000000365	E037	Rnf17
ENSMUSG00000000374	E001	Trappc10	-0.157808	9.95382e-16	-0.00901849	0.999962	-0.0443779	0.0809724	0.0272978	0.906045	0.0126855	0.828921
ENSMUSG00000000374	E002	Trappc10	-0.0110871	0.86973	0.0054393	0.999962	0.027153	0.579605	-0.0212813	0.888243	-0.00709821	0.972342
ENSMUSG00000000374	E003	Trappc10	-0.0350208	0.520266	-0.00614362	0.999962	0.0382604	0.424083	0.00587017	0.982192	0.0119074	0.899785
ENSMUSG00000000374	E004	Trappc10	0.00198348	0.958106	-0.0306911	0.999962	0.0374944	0.473708	-0.0294474	0.857252	-0.0103492	0.961061
ENSMUSG00000000374	E005	Trappc10	-0.00139191	0.977849	0.0132346	0.999962	0.0565085	0.191708	-0.0217327	0.877358	-0.0322676	0.794344
ENSMUSG00000000374	E006	Trappc10	-0.0270205	0.687488	-0.0580614	0.999962	0.00972112	0.893239	0.00316808	0.991241	-0.0688819	0.505264
ENSMUSG00000000374	E007	Trappc10	0.00633993	0.857376	-0.0306126	0.999962	0.0372874	0.417646	-0.0136628	0.931458	-0.00535347	0.978804
ENSMUSG00000000374	E008	Trappc10	-0.0138134	0.90741	-0.0326605	0.999962	-0.00280039	0.958161	-0.00555397	0.968382	0.00843666	0.956678
ENSMUSG00000000374	E009	Trappc10	-0.00934534	0.907637	-0.0117632	0.999962	-0.0506347	0.301555	-0.0135375	0.930947	0.0127872	0.880849
ENSMUSG00000000374	E010	Trappc10	0.0231387	0.520834	0.0117505	0.999962	-0.020799	0.641061	-0.0017852	0.982192	0.0144548	0.789379
ENSMUSG00000000374	E011	Trappc10	-0.0135737	0.881228	0.0234305	0.999962	-0.0210805	0.83791	0.0481784	0.748571	-0.00332576	0.996899
ENSMUSG00000000374	E012	Trappc10	-0.0445369	0.362751	-0.0028618	0.999962	-0.0521628	0.285348	-0.00201201	0.973665	0.0341892	0.720763
ENSMUSG00000000374	E013	Trappc10	-0.0357118	0.854391	0.00798502	0.999962	-0.09001	0.111737	-0.0062645	0.964337	0.00130401	0.981357
ENSMUSG00000000374	E014	Trappc10	-0.0536757	0.735497			-0.0720541	0.227552	0.0436928	0.926577	0.0275929	0.94036
ENSMUSG00000000374	E015	Trappc10	-0.0273979	0.81683	0.00260785	0.999962	-0.0456496	0.483717	0.030545	0.919511	0.0389295	0.797393
ENSMUSG00000000374	E016	Trappc10	0.110149	0.00859238	0.0278246	0.999962	0.0229779	0.786787	-0.0306604	0.862909	-0.00728401	0.967968
ENSMUSG00000000374	E017	Trappc10	0.146351	1.98123e-05	0.0611471	0.999962	0.058825	0.278996	0.00898556	0.971451	0.0202785	0.872438
ENSMUSG00000000374	E018	Trappc10	0.183365	4.82929e-05			0.0919688	0.129414	0.0188113	0.935577	-0.0343731	0.846661
ENSMUSG00000000374	E019	Trappc10	0.147933	3.86662e-05	0.0719383	0.999962	0.0633746	0.430893	0.00635794	0.984009	-0.0214967	0.870088
ENSMUSG00000000374	E020	Trappc10	0.0696432	0.308086	0.0332891	0.999962	0.0259286	0.738752	0.022633	0.975843	-0.0369844	0.823959
ENSMUSG00000000374	E021	Trappc10	0.0780653	0.333757			-0.0306792	0.757361	-0.00576731	0.972232	-0.0658638	0.701884
ENSMUSG00000000374	E022	Trappc10	0.113936	0.183687			0.0137203	0.913301			0.0202249	0.957936
ENSMUSG00000000374	E023	Trappc10	0.0815778	0.566774			-0.06405	0.857501			0.0711031	0.85254
ENSMUSG00000000378	E001	Ccm2	-0.438866	0.273133
ENSMUSG00000000378	E002	Ccm2	0.143685	0.00499971			0.0845349	0.121657	0.0335238	0.891131	0.127285	0.0310009
ENSMUSG00000000378	E003	Ccm2
ENSMUSG00000000378	E004	Ccm2
ENSMUSG00000000378	E005	Ccm2
ENSMUSG00000000378	E006	Ccm2	-0.0915144	0.882564
ENSMUSG00000000378	E007	Ccm2	-0.0901527	0.886535
ENSMUSG00000000378	E008	Ccm2
ENSMUSG00000000378	E009	Ccm2	0.0415258	0.387269	-0.0119239	0.999962	0.0525339	0.317636	0.0301007	0.85067	0.0443291	0.649205
ENSMUSG00000000378	E010	Ccm2	0.0475732	0.32172	0.0317781	0.999962	0.0582659	0.301374	0.0369197	0.930586	-0.00502698	0.898467
ENSMUSG00000000378	E011	Ccm2	0.041575	0.157219	-0.00213532	0.999962	0.0267399	0.462619	0.000643364	0.993768	0.0434604	0.455657
ENSMUSG00000000378	E012	Ccm2	0.0435705	0.339774	0.0013829	0.999962	0.0161262	0.76317	-0.007691	0.930807	0.00396772	0.992914
ENSMUSG00000000378	E013	Ccm2	0.0492614	0.220615	0.00823525	0.999962	0.0250883	0.624771	-0.0280682	0.798053	-0.0483017	0.492217
ENSMUSG00000000378	E014	Ccm2	0.0156658	0.69981	-0.0103422	0.999962	-0.00929627	0.876934	-0.00319851	0.961794	-0.0365131	0.512734
ENSMUSG00000000378	E015	Ccm2
ENSMUSG00000000378	E016	Ccm2	-0.0548424	0.397243			-0.0465552	0.719018	0.00437947	0.994046	-0.0267425	0.847387
ENSMUSG00000000378	E017	Ccm2	-0.0224289	0.669601	0.0225992	0.999962	-0.0196939	0.837006	0.00195822	0.996441	-0.0295869	0.772873
ENSMUSG00000000378	E018	Ccm2
ENSMUSG00000000378	E019	Ccm2
ENSMUSG00000000378	E020	Ccm2	-0.0120917	0.772057	0.00205899	0.999962	-0.0175026	0.746484	-0.00835312	0.947377	-0.00879371	0.910655
ENSMUSG00000000378	E021	Ccm2	-0.0541672	0.138462	-0.00914718	0.999962	-0.0491013	0.338069	-0.00985261	0.947702	-0.0408097	0.601262
ENSMUSG00000000378	E022	Ccm2	-0.116706	0.0660482			-0.0428212	0.595943	-0.0228829	0.920989	-0.0395781	0.778423
ENSMUSG00000000378	E023	Ccm2	-0.125048	2.90299e-05	-0.0127327	0.999962	-0.0633943	0.169782	-0.00624555	0.96821	-0.00973542	0.919987
ENSMUSG00000000378	E024	Ccm2	-0.611908	0.217713
ENSMUSG00000000378	E025	Ccm2
ENSMUSG00000000381	E001	Wap
ENSMUSG00000000381	E002	Wap
ENSMUSG00000000381	E003	Wap
ENSMUSG00000000381	E004	Wap
ENSMUSG00000000381	E005	Wap
ENSMUSG00000000381	E006	Wap
ENSMUSG00000000381	E007	Wap
ENSMUSG00000000381	E008	Wap
ENSMUSG00000000384	E001	Tbrg4	-0.525669	0.00101718
ENSMUSG00000000384	E002	Tbrg4	-0.186578	0.284597			-0.0509497	0.734879
ENSMUSG00000000384	E003	Tbrg4	-0.100225	0.468921			-0.0864381	0.253348
ENSMUSG00000000384	E004	Tbrg4	-0.0940372	0.449802			-0.116425	0.058746			0.0153315	0.972342
ENSMUSG00000000384	E005	Tbrg4
ENSMUSG00000000384	E006	Tbrg4	-0.153361	0.0642756			-0.155404	0.0400369
ENSMUSG00000000384	E007	Tbrg4	-0.0867198	0.228418			-0.11494	0.0725399			0.0114697	0.994121
ENSMUSG00000000384	E008	Tbrg4
ENSMUSG00000000384	E009	Tbrg4	-0.00201417	0.976977			-0.0527692	0.565205
ENSMUSG00000000384	E010	Tbrg4	0.0203101	0.81435			0.0351168	0.753162	-0.0104366	0.957585	0.00208755	0.983791
ENSMUSG00000000384	E011	Tbrg4	0.0306076	0.682469			0.0359626	0.761854	0.0108187	0.986664	-0.0437212	0.748367
ENSMUSG00000000384	E012	Tbrg4	-0.00535653	0.952285			0.0368491	0.761074
ENSMUSG00000000384	E013	Tbrg4	0.0214837	0.882859			0.0601024	0.706407
ENSMUSG00000000384	E014	Tbrg4	0.0225633	0.852073			-0.0159332	0.937809
ENSMUSG00000000384	E015	Tbrg4	0.131274	0.0673948			0.0589905	0.592195			-0.0184808	0.897637
ENSMUSG00000000384	E016	Tbrg4	0.171062	0.0706861			0.158461	0.0622428
ENSMUSG00000000384	E017	Tbrg4	0.0624033	0.376191			0.0544683	0.487955			0.0313616	0.908886
ENSMUSG00000000384	E018	Tbrg4	0.0661702	0.788766
ENSMUSG00000000384	E019	Tbrg4	0.145769	0.463041
ENSMUSG00000000384	E020	Tbrg4	0.632181	0.158864
ENSMUSG00000000384	E021	Tbrg4	0.430664	0.291018
ENSMUSG00000000384	E022	Tbrg4	0.0242319	0.796036			0.0703389	0.311655			-0.00329533	0.968825
ENSMUSG00000000384	E023	Tbrg4	0.0350258	0.756542			0.0415875	0.742047
ENSMUSG00000000384	E024	Tbrg4	-0.0434723	0.704509			-0.0568849	0.709663
ENSMUSG00000000384	E025	Tbrg4	-0.0232067	0.978622
ENSMUSG00000000384	E026	Tbrg4	-0.491237	0.268392
ENSMUSG00000000384	E027	Tbrg4	-0.0018779	0.973814			0.00434976	0.980489
ENSMUSG00000000384	E028	Tbrg4	-0.0176981	0.925698			0.0233781	0.869168			0.0259759	0.943781
ENSMUSG00000000384	E029	Tbrg4	-0.0469204	0.937069			0.0250043	0.964272
ENSMUSG00000000384	E030	Tbrg4	0.169509	0.702996
ENSMUSG00000000384	E031	Tbrg4	-0.0251715	0.956011			0.0546257	0.904775
ENSMUSG00000000384	E032	Tbrg4	0.0964914	0.819981
ENSMUSG00000000384	E033	Tbrg4	0.0734744	0.90547
ENSMUSG00000000385	E001	Tmprss2
ENSMUSG00000000385	E002	Tmprss2
ENSMUSG00000000385	E003	Tmprss2
ENSMUSG00000000385	E004	Tmprss2
ENSMUSG00000000385	E005	Tmprss2
ENSMUSG00000000385	E006	Tmprss2
ENSMUSG00000000385	E007	Tmprss2
ENSMUSG00000000385	E008	Tmprss2
ENSMUSG00000000385	E009	Tmprss2
ENSMUSG00000000385	E010	Tmprss2
ENSMUSG00000000385	E011	Tmprss2
ENSMUSG00000000385	E012	Tmprss2
ENSMUSG00000000385	E013	Tmprss2
ENSMUSG00000000385	E014	Tmprss2
ENSMUSG00000000386	E001	Mx1
ENSMUSG00000000386	E002	Mx1	-0.229224	0.236292
ENSMUSG00000000386	E003	Mx1	0.172429	0.631756
ENSMUSG00000000386	E004	Mx1
ENSMUSG00000000386	E005	Mx1
ENSMUSG00000000386	E006	Mx1
ENSMUSG00000000386	E007	Mx1
ENSMUSG00000000386	E008	Mx1
ENSMUSG00000000386	E009	Mx1
ENSMUSG00000000386	E010	Mx1
ENSMUSG00000000386	E011	Mx1
ENSMUSG00000000386	E012	Mx1
ENSMUSG00000000386	E013	Mx1
ENSMUSG00000000386	E014	Mx1
ENSMUSG00000000386	E015	Mx1
ENSMUSG00000000386	E016	Mx1
ENSMUSG00000000386	E017	Mx1
ENSMUSG00000000386	E018	Mx1
ENSMUSG00000000386	E019	Mx1
ENSMUSG00000000386	E020	Mx1
ENSMUSG00000000386	E021	Mx1
ENSMUSG00000000386	E022	Mx1
ENSMUSG00000000386	E023	Mx1
ENSMUSG00000000386	E024	Mx1
ENSMUSG00000000386	E025	Mx1
ENSMUSG00000000386	E026	Mx1
ENSMUSG00000000392	E001	Fap	-0.112808	0.809
ENSMUSG00000000392	E002	Fap
ENSMUSG00000000392	E003	Fap	0.189577	0.912049
ENSMUSG00000000392	E004	Fap	-0.659229	0.17526
ENSMUSG00000000392	E005	Fap	-0.160089	0.731649
ENSMUSG00000000392	E006	Fap
ENSMUSG00000000392	E007	Fap	0.0702446	0.960169
ENSMUSG00000000392	E008	Fap	0.0804209	0.94972
ENSMUSG00000000392	E009	Fap	-0.135374	0.799906
ENSMUSG00000000392	E010	Fap	-0.12022	0.756397
ENSMUSG00000000392	E011	Fap	-0.123993	0.775017
ENSMUSG00000000392	E012	Fap	-0.193355	0.561537
ENSMUSG00000000392	E013	Fap	-0.201255	0.692014
ENSMUSG00000000392	E014	Fap	-0.341448	0.437541
ENSMUSG00000000392	E015	Fap	-0.359446	0.494856
ENSMUSG00000000392	E016	Fap	-0.0955255	0.592595
ENSMUSG00000000392	E017	Fap	-0.194023	0.51339
ENSMUSG00000000392	E018	Fap	-0.140526	0.693512
ENSMUSG00000000392	E019	Fap	0.161326	0.811204
ENSMUSG00000000392	E020	Fap	0.324554	0.483244
ENSMUSG00000000392	E021	Fap
ENSMUSG00000000392	E022	Fap	0.190779	0.787836
ENSMUSG00000000392	E023	Fap	0.108979	0.897706
ENSMUSG00000000392	E024	Fap	-0.174954	0.527678
ENSMUSG00000000392	E025	Fap	-0.145951	0.592145
ENSMUSG00000000392	E026	Fap	-0.21313	0.532448
ENSMUSG00000000392	E027	Fap
ENSMUSG00000000392	E028	Fap
ENSMUSG00000000392	E029	Fap	0.656607	0.274388
ENSMUSG00000000392	E030	Fap
ENSMUSG00000000392	E031	Fap	0.934565	0.0806282
ENSMUSG00000000392	E032	Fap	0.975037	0.196553
ENSMUSG00000000392	E033	Fap	0.397473	0.575967
ENSMUSG00000000392	E034	Fap
ENSMUSG00000000392	E035	Fap
ENSMUSG00000000392	E036	Fap	0.427873	0.469566
ENSMUSG00000000392	E037	Fap
ENSMUSG00000000392	E038	Fap
ENSMUSG00000000392	E039	Fap	1.37813	0.0408587
ENSMUSG00000000392	E040	Fap
ENSMUSG00000000392	E041	Fap
ENSMUSG00000000394	E001	Gcg
ENSMUSG00000000394	E002	Gcg
ENSMUSG00000000394	E003	Gcg
ENSMUSG00000000394	E004	Gcg
ENSMUSG00000000394	E005	Gcg
ENSMUSG00000000394	E006	Gcg
ENSMUSG00000000394	E007	Gcg
ENSMUSG00000000394	E008	Gcg
ENSMUSG00000000394	E009	Gcg
ENSMUSG00000000394	E010	Gcg
ENSMUSG00000000394	E011	Gcg
ENSMUSG00000000399	E001	Ndufa9	0.0352034	0.73969	-0.0217304	0.999962	-0.038621	0.592681	-0.021188	0.957182	0.0420125	0.641581
ENSMUSG00000000399	E002	Ndufa9	0.0646241	0.193662	-0.0118905	0.999962	0.0646431	0.0359034	-0.0220938	0.947655	0.0033323	0.968336
ENSMUSG00000000399	E003	Ndufa9	2.40559e-05	0.907186	0.00524667	0.999962	0.0176719	0.629328	0.0424376	0.392306	0.0653958	0.115815
ENSMUSG00000000399	E004	Ndufa9	-0.0402707	0.231153	0.00201511	0.999962	-0.0106468	0.93061	0.0538682	0.409268	0.0267915	0.738545
ENSMUSG00000000399	E005	Ndufa9	-0.0193341	0.711265	-0.0150147	0.999962	0.0139264	0.694377	0.0346979	0.648646	-0.01991	0.817808
ENSMUSG00000000399	E006	Ndufa9	0.0121798	0.815545	-0.000282529	0.999962	0.0220185	0.3705	0.00462974	0.907584	-0.0477159	0.232388
ENSMUSG00000000399	E007	Ndufa9	-0.0212991	0.168146	-0.00406175	0.999962	-0.0312084	0.101326	-0.0027778	0.960723	0.043363	0.190497
ENSMUSG00000000399	E008	Ndufa9	-0.0120523	0.752273	0.00278729	0.999962	-0.0162799	0.765968	-0.0140096	0.950166	-0.00192844	0.981236
ENSMUSG00000000399	E009	Ndufa9	-0.0112734	0.79298	0.008461	0.999962	-0.00382731	0.985883	-0.0423447	0.724367	-0.11848	0.00944303
ENSMUSG00000000399	E010	Ndufa9	0.053159	0.572162	0.0241782	0.999962	-0.00284259	0.97661	-0.0798191	0.661161	-0.0227921	0.918692
ENSMUSG00000000399	E011	Ndufa9	0.0743214	0.549927	0.000996488	0.999962	-0.0231942	0.783261	-0.103965	0.708663	-0.040364	0.887504
ENSMUSG00000000402	E001	Egfl6	-0.0600324	0.92112
ENSMUSG00000000402	E002	Egfl6	0.206908	0.626355
ENSMUSG00000000402	E003	Egfl6	-0.442977	0.241028
ENSMUSG00000000402	E004	Egfl6	0.063761	0.949302
ENSMUSG00000000402	E005	Egfl6	-0.0804684	0.824054
ENSMUSG00000000402	E006	Egfl6	-0.0224703	0.974628
ENSMUSG00000000402	E007	Egfl6	-0.0949486	0.839685
ENSMUSG00000000402	E008	Egfl6	0.232737	0.559926
ENSMUSG00000000402	E009	Egfl6	0.268849	0.494104
ENSMUSG00000000402	E010	Egfl6	-0.340566	0.45291
ENSMUSG00000000402	E011	Egfl6	-0.0159989	0.982312
ENSMUSG00000000402	E012	Egfl6	0.499273	0.418314
ENSMUSG00000000409	E001	Lck
ENSMUSG00000000409	E002	Lck	-0.0821916	0.831746
ENSMUSG00000000409	E003	Lck	-0.278555	0.559267
ENSMUSG00000000409	E004	Lck	0.0504825	0.916925
ENSMUSG00000000409	E005	Lck	0.421346	0.150464
ENSMUSG00000000409	E006	Lck	-0.0171244	0.998382
ENSMUSG00000000409	E007	Lck	-0.0520812	0.952044
ENSMUSG00000000409	E008	Lck	-0.041553	0.942191
ENSMUSG00000000409	E009	Lck	-0.0892673	0.737471
ENSMUSG00000000409	E010	Lck	-0.239619	0.622629
ENSMUSG00000000409	E011	Lck	0.13992	0.517803
ENSMUSG00000000409	E012	Lck	0.45887	0.458288
ENSMUSG00000000409	E013	Lck	-0.190117	0.591375
ENSMUSG00000000409	E014	Lck	-0.0974377	0.887159
ENSMUSG00000000409	E015	Lck
ENSMUSG00000000409	E016	Lck
ENSMUSG00000000409	E017	Lck
ENSMUSG00000000409	E018	Lck
ENSMUSG00000000409	E019	Lck
ENSMUSG00000000409	E020	Lck
ENSMUSG00000000409	E021	Lck
ENSMUSG00000000409	E022	Lck
ENSMUSG00000000409	E023	Lck
ENSMUSG00000000409	E024	Lck
ENSMUSG00000000409	E025	Lck
ENSMUSG00000000411	E001	Tssk3
ENSMUSG00000000411	E002	Tssk3		0.931359
ENSMUSG00000000416	E001	Cttnbp2	-0.741717	0.270187
ENSMUSG00000000416	E002	Cttnbp2	-0.638472	0.231041
ENSMUSG00000000416	E003	Cttnbp2	-0.259684	0.272513
ENSMUSG00000000416	E004	Cttnbp2	-0.135212	0.0429225	0.0686755	0.999962	-0.0436482	0.547979	0.074748	0.790958	0.072647	0.565495
ENSMUSG00000000416	E005	Cttnbp2	0.00855924	0.974976			0.0814272	0.181622			0.0254489	0.823711
ENSMUSG00000000416	E006	Cttnbp2	-0.0326029	0.617197			0.0521917	0.384771			0.0359688	0.747846
ENSMUSG00000000416	E007	Cttnbp2	-0.0809945	0.210357			-0.0112313	0.964877			0.0142508	0.848738
ENSMUSG00000000416	E008	Cttnbp2	-0.0631703	0.335567			0.0404378	0.5302			0.0747007	0.510088
ENSMUSG00000000416	E009	Cttnbp2	-0.0578938	0.196316	0.0105646	0.999962	0.00586161	0.947898	0.0370558	0.779636	0.097114	0.135492
ENSMUSG00000000416	E010	Cttnbp2	-0.131446	0.00249281	-0.0169637	0.999962	-0.0690371	0.368598	0.0233498	0.876672	0.0934215	0.165898
ENSMUSG00000000416	E011	Cttnbp2	-0.037091	0.48445	-0.0265617	0.999962	-0.0318313	0.715169	0.0113027	0.93483	0.00459309	0.909696
ENSMUSG00000000416	E012	Cttnbp2	0.0357524	0.697003			-0.000250105	0.95842	-0.0259154	0.972258	0.0193654	0.837934
ENSMUSG00000000416	E013	Cttnbp2	0.0123378	0.905644	-0.00890911	0.999962	0.022794	0.613461	-0.0135458	0.978187	-0.00121323	0.936202
ENSMUSG00000000416	E014	Cttnbp2	-0.0189555	0.767348			0.0398586	0.520958	0.0115565	0.950174	-0.0299779	0.930128
ENSMUSG00000000416	E015	Cttnbp2	-0.0498667	0.477645	-0.00534183	0.999962	0.0181191	0.881127	0.0326927	0.864888	0.0854469	0.416024
ENSMUSG00000000416	E016	Cttnbp2	-0.0246908	0.649533	-0.0101021	0.999962	0.0396524	0.772757	0.0445923	0.780046	0.0376593	0.675748
ENSMUSG00000000416	E017	Cttnbp2	-0.0483188	0.370439			-0.0286061	0.792786	-0.00590165	0.996897	-0.0380607	0.882458
ENSMUSG00000000416	E018	Cttnbp2	-0.029492	0.636256			-0.00844254	0.980335	-0.00323427	0.99158	0.0394752	0.70557
ENSMUSG00000000416	E019	Cttnbp2	-0.0109601	0.855259	-0.0182387	0.999962	0.0067847	0.884472	0.005437	0.966383	0.0536976	0.673383
ENSMUSG00000000416	E020	Cttnbp2	-0.0321885	0.436325	0.00113715	0.999962	-0.0333465	0.622773	0.0301747	0.798307	0.0149537	0.833326
ENSMUSG00000000416	E021	Cttnbp2	-0.0202818	0.752358			-0.00148214	0.962261	0.0350799	0.832998	-0.0224079	0.957663
ENSMUSG00000000416	E022	Cttnbp2	-0.0421415	0.391908	0.00995299	0.999962	-0.0723472	0.198899	0.00201973	0.974791	-0.0384405	0.860416
ENSMUSG00000000416	E023	Cttnbp2	-0.0231027	0.665405	0.0221544	0.999962	-0.0691678	0.272956	-0.0520216	0.836727	-0.03979	0.931758
ENSMUSG00000000416	E024	Cttnbp2	-0.00513932	0.927383			-0.011547	0.978487
ENSMUSG00000000416	E025	Cttnbp2
ENSMUSG00000000416	E026	Cttnbp2
ENSMUSG00000000416	E027	Cttnbp2	-0.321191	0.152069
ENSMUSG00000000416	E028	Cttnbp2	-0.209484	0.419222
ENSMUSG00000000416	E029	Cttnbp2	-0.209276	0.0164707			-0.184787	0.185908			0.0858789	0.776019
ENSMUSG00000000416	E030	Cttnbp2	0.0442126	0.85937
ENSMUSG00000000416	E031	Cttnbp2	0.16161	0.000408378			0.0476175	0.732521	-0.0790069	0.746085	-0.124787	0.206572
ENSMUSG00000000416	E032	Cttnbp2	0.180348	0.00223643	-0.0295246	0.999962	0.0628034	0.429192	-0.059797	0.885813	-0.129392	0.401494
ENSMUSG00000000416	E033	Cttnbp2	0.185102	0.099884			0.00630984	0.982118	-0.102363	0.781107	-0.180079	0.444073
ENSMUSG00000000416	E034	Cttnbp2	0.185166	0.113626			-0.0418814	0.855547
ENSMUSG00000000416	E035	Cttnbp2	0.207957	0.00440841			0.0046055	0.947112			-0.200954	0.0865247
ENSMUSG00000000416	E036	Cttnbp2
ENSMUSG00000000416	E037	Cttnbp2	0.286923	0.000469824			0.105623	0.380407
ENSMUSG00000000416	E038	Cttnbp2
ENSMUSG00000000416	E039	Cttnbp2	0.326337	0.000110805			0.1172	0.356666
ENSMUSG00000000416	E040	Cttnbp2	0.341854	0.0357385
ENSMUSG00000000416	E041	Cttnbp2	0.405529	0.0480332
ENSMUSG00000000416	E042	Cttnbp2	0.461224	0.0979378
ENSMUSG00000000420	E001	Galnt1	-0.511982	0.202315
ENSMUSG00000000420	E002	Galnt1
ENSMUSG00000000420	E003	Galnt1	-0.0535554	0.815411
ENSMUSG00000000420	E004	Galnt1	-0.0760836	0.922742
ENSMUSG00000000420	E005	Galnt1
ENSMUSG00000000420	E006	Galnt1	-0.0191807	0.835992			-0.059299	0.851668			0.109967	0.640718
ENSMUSG00000000420	E007	Galnt1	-0.0385214	0.770316			-0.0693397	0.735829	0.0961957	0.724367	0.0958047	0.627054
ENSMUSG00000000420	E008	Galnt1	0.0114979	0.972815			0.0352146	0.9069	0.00668341	0.963199	-0.0460492	0.914182
ENSMUSG00000000420	E009	Galnt1	-0.0171085	0.968671			-0.0628675	0.757239	0.0104779	0.980368	-0.058912	0.571165
ENSMUSG00000000420	E010	Galnt1	-0.00471589	0.772948			0.00503755	0.919243	0.00664387	0.989259	-0.0117964	0.772933
ENSMUSG00000000420	E011	Galnt1	0.0695824	0.124966			0.0760765	0.481534	-0.00145514	0.942431	0.0122216	0.993316
ENSMUSG00000000420	E012	Galnt1	0.0490899	0.250011			0.044678	0.814692	-0.0248898	0.861726	0.0346836	0.849672
ENSMUSG00000000420	E013	Galnt1	0.0704017	0.164978	0.00938797	0.999962	0.0031539	0.908322	-0.0176939	0.971764	-0.0311328	0.84136
ENSMUSG00000000420	E014	Galnt1	0.0401756	0.365051	0.00387717	0.999962	-0.00525069	0.990049	-0.00615329	0.96538	-0.0515166	0.400737
ENSMUSG00000000420	E015	Galnt1	0.0478321	0.140397			-0.0201668	0.931373	-0.0407996	0.500918	-0.0980937	0.0190135
ENSMUSG00000000420	E016	Galnt1	0.0235959	0.346453			0.00813962	0.855605	-0.00510667	0.895676	0.00520744	0.990385
ENSMUSG00000000420	E017	Galnt1	0.0182906	0.271492			-0.000304167	0.937378	0.0147377	0.998198	0.000206286	0.838116
ENSMUSG00000000420	E018	Galnt1	0.0546003	0.328065			0.0263249	0.647029	0.0273333	0.798715	0.0121013	0.851967
ENSMUSG00000000420	E019	Galnt1	-0.0113515	0.9415	-0.00531703	0.999962	-0.0279511	0.817648	0.0212668	0.826583	0.033521	0.60348
ENSMUSG00000000420	E020	Galnt1	-0.0858999	0.348035			-0.00725929	0.989357	0.0360103	0.892937	0.0514885	0.636577
ENSMUSG00000000420	E021	Galnt1	-0.0387827	0.941846			0.0300319	0.820617	-0.00917038	0.846857	0.0343665	0.854418
ENSMUSG00000000420	E022	Galnt1	-0.00552916	0.768911			0.0676644	0.707776	0.0167716	0.998936	0.0170611	0.991906
ENSMUSG00000000420	E023	Galnt1	-0.0312784	0.977407			0.0169816	0.860794	-0.0188382	0.66686	0.0171287	0.973138
ENSMUSG00000000420	E024	Galnt1	-0.83791	0.157383
ENSMUSG00000000420	E025	Galnt1	-0.27736	0.727309
ENSMUSG00000000420	E026	Galnt1	-0.205672	0.844761
ENSMUSG00000000420	E027	Galnt1	-0.143798	0.00202407	-0.00730018	0.999962	-0.0521344	0.278945	-0.0225574	0.960185	-0.00375603	0.962722
ENSMUSG00000000420	E028	Galnt1
ENSMUSG00000000435	E001	Myf5
ENSMUSG00000000435	E002	Myf5
ENSMUSG00000000435	E003	Myf5
ENSMUSG00000000439	E001	Mkrn2	0.146445	0.504239			0.0101773	0.963353
ENSMUSG00000000439	E002	Mkrn2	0.0891801	0.646988			-0.022687	0.913221
ENSMUSG00000000439	E003	Mkrn2	0.112922	0.0598561			0.0545827	0.472281			-0.123255	0.286595
ENSMUSG00000000439	E004	Mkrn2	0.00325379	0.935919	0.00924709	0.999962	0.000236962	0.992365	-0.0451329	0.982346	0.0378643	0.663621
ENSMUSG00000000439	E005	Mkrn2	-0.0137825	0.883872	0.0296486	0.999962	0.0244212	0.695369	-0.0136764	0.943877	0.0236617	0.922481
ENSMUSG00000000439	E006	Mkrn2	-0.0836253	0.037297	-0.0343457	0.999962	-0.0108646	0.8873	0.0655831	0.284793	0.0210379	0.859556
ENSMUSG00000000439	E007	Mkrn2	-0.0272988	0.628243	-0.0287425	0.999962	-0.0130768	0.89751	0.00324331	0.808283	-0.0023114	0.993338
ENSMUSG00000000439	E008	Mkrn2	-0.00593771	0.835993	0.012493	0.999962	-0.0373645	0.524404	0.00363266	0.777181	0.00200956	0.970821
ENSMUSG00000000440	E001	Pparg	0.00955419	0.989441
ENSMUSG00000000440	E002	Pparg	-0.0998031	0.768532
ENSMUSG00000000440	E003	Pparg
ENSMUSG00000000440	E004	Pparg	-0.102165	0.636256
ENSMUSG00000000440	E005	Pparg	-0.210001	0.270723
ENSMUSG00000000440	E006	Pparg	-0.0586319	0.816733
ENSMUSG00000000440	E007	Pparg	0.199511	0.441525
ENSMUSG00000000440	E008	Pparg	0.172685	0.339596
ENSMUSG00000000440	E009	Pparg	0.0256323	0.968202
ENSMUSG00000000441	E001	Raf1
ENSMUSG00000000441	E002	Raf1	-0.0992389	0.00334542	-0.0453728	0.999962	-0.0566193	0.185878	0.0311474	0.951903	-0.0092993	0.905368
ENSMUSG00000000441	E003	Raf1	-0.0677676	0.0876447	-0.0645962	0.999962	-0.0664147	0.224264	-0.00372399	0.953024	-0.0377388	0.718185
ENSMUSG00000000441	E004	Raf1	-0.114545	0.00974864	-0.0597847	0.999962	-0.0522134	0.215172	0.0878754	0.596912	0.0143627	0.94469
ENSMUSG00000000441	E005	Raf1	-0.0773602	0.112754	-0.0389474	0.999962	-0.0664988	0.144023	0.0140646	0.986821	-0.0665698	0.553547
ENSMUSG00000000441	E006	Raf1	0.0226327	0.869048			-0.0891466	0.628663			0.123972	0.685159
ENSMUSG00000000441	E007	Raf1	-0.0641042	0.218206	-0.0179705	0.999962	-0.00362296	0.990621	0.0214429	0.971328	-0.0314914	0.825585
ENSMUSG00000000441	E008	Raf1	1.55709	0.0022771
ENSMUSG00000000441	E009	Raf1	-0.00324502	0.946888	0.00384059	0.999962	-0.0177247	0.79025	-0.00705745	0.934583	0.00398023	0.996899
ENSMUSG00000000441	E010	Raf1	-0.0721831	0.108509	-0.0146263	0.999962	-0.0420474	0.560825	0.000889926	0.982486	0.0297829	0.85124
ENSMUSG00000000441	E011	Raf1	-0.149597	0.805005
ENSMUSG00000000441	E012	Raf1	-0.0182341	0.757852	-0.0376544	0.999962	-0.067648	0.221294	-0.0268247	0.811581	-0.0242729	0.819222
ENSMUSG00000000441	E013	Raf1	-0.0182882	0.736859	0.009969	0.999962	-0.0556284	0.457938	-0.0265491	0.8167	0.00273299	0.993265
ENSMUSG00000000441	E014	Raf1	0.0294017	0.67097			-0.0487988	0.692346	-0.104249	0.336064	-0.034242	0.795173
ENSMUSG00000000441	E015	Raf1	-0.169008	0.555979
ENSMUSG00000000441	E016	Raf1	-0.202017	0.217415			-0.153825	0.322228
ENSMUSG00000000441	E017	Raf1	-0.133059	0.750076
ENSMUSG00000000441	E018	Raf1	-0.102418	0.581534
ENSMUSG00000000441	E019	Raf1	0.108253	0.000431098	0.0444584	0.999962	0.0588168	0.399714	-0.0353165	0.640066	-0.00518792	0.928124
ENSMUSG00000000441	E020	Raf1	0.0722416	0.0486532	0.0238746	0.999962	0.0645894	0.200282	0.0408139	0.835671	0.0298332	0.822565
ENSMUSG00000000441	E021	Raf1	0.046051	0.375893	0.0346786	0.999962	0.0391846	0.502935	0.0305857	0.926292	0.0365022	0.805262
ENSMUSG00000000441	E022	Raf1	0.0626802	0.191232	0.0646142	0.999962	0.0728927	0.121337	0.00810266	0.989336	-0.00975673	0.909146
ENSMUSG00000000441	E023	Raf1	0.083054	0.0740197	0.0543838	0.999962	0.0997846	0.0306159	-0.00683101	0.91753	-0.0180551	0.842652
ENSMUSG00000000441	E024	Raf1	0.105214	0.0238916	0.0633052	0.999962	0.125733	0.00536441	0.00508003	0.975574	0.0104477	0.987487
ENSMUSG00000000441	E025	Raf1	0.0856468	0.101415			0.111105	0.0271987	-0.0354741	0.803253	0.0666333	0.604008
ENSMUSG00000000441	E026	Raf1	-0.208903	0.704837
ENSMUSG00000000441	E027	Raf1
ENSMUSG00000000486	E001	Sept1
ENSMUSG00000000486	E002	Sept1
ENSMUSG00000000486	E003	Sept1
ENSMUSG00000000486	E004	Sept1
ENSMUSG00000000486	E005	Sept1	-0.131507	0.75425
ENSMUSG00000000486	E006	Sept1
ENSMUSG00000000486	E007	Sept1
ENSMUSG00000000486	E008	Sept1
ENSMUSG00000000486	E009	Sept1	0.127701	0.930192
ENSMUSG00000000486	E010	Sept1
ENSMUSG00000000486	E011	Sept1
ENSMUSG00000000486	E012	Sept1
ENSMUSG00000000486	E013	Sept1
ENSMUSG00000000486	E014	Sept1
ENSMUSG00000000486	E015	Sept1
ENSMUSG00000000486	E016	Sept1
ENSMUSG00000000486	E017	Sept1
ENSMUSG00000000486	E018	Sept1
ENSMUSG00000000486	E019	Sept1
ENSMUSG00000000486	E020	Sept1
ENSMUSG00000000486	E021	Sept1
ENSMUSG00000000486	E022	Sept1
ENSMUSG00000000486	E023	Sept1
ENSMUSG00000000486	E024	Sept1
ENSMUSG00000000486	E025	Sept1
ENSMUSG00000000486	E026	Sept1
ENSMUSG00000000486	E027	Sept1
ENSMUSG00000000486	E028	Sept1
ENSMUSG00000000486	E029	Sept1
ENSMUSG00000000486	E030	Sept1
ENSMUSG00000000489	E001	Pdgfb	-0.022283	0.787749			-0.0595099	0.417879		0.991354		0.557763
ENSMUSG00000000489	E002	Pdgfb	0.0315911	0.755218			-0.00105935	0.98165
ENSMUSG00000000489	E003	Pdgfb	0.00764338	0.931343			0.00612797	0.944508
ENSMUSG00000000489	E004	Pdgfb	0.0484779	0.581262			0.0580883	0.542607
ENSMUSG00000000489	E005	Pdgfb	0.0314574	0.818771			0.0538423	0.721795
ENSMUSG00000000489	E006	Pdgfb	-0.0198627	0.927269			0.0545186	0.759079
ENSMUSG00000000489	E007	Pdgfb	-0.134355	0.59906			-0.0471741	0.928116
ENSMUSG00000000530	E001	Acvrl1
ENSMUSG00000000530	E002	Acvrl1
ENSMUSG00000000530	E003	Acvrl1
ENSMUSG00000000530	E004	Acvrl1
ENSMUSG00000000530	E005	Acvrl1
ENSMUSG00000000530	E006	Acvrl1
ENSMUSG00000000530	E007	Acvrl1
ENSMUSG00000000530	E008	Acvrl1
ENSMUSG00000000530	E009	Acvrl1
ENSMUSG00000000530	E010	Acvrl1
ENSMUSG00000000530	E011	Acvrl1
ENSMUSG00000000530	E012	Acvrl1
ENSMUSG00000000530	E013	Acvrl1	0.0772044	0.851918
ENSMUSG00000000530	E014	Acvrl1	0.215811	0.628582
ENSMUSG00000000530	E015	Acvrl1	0.214248	0.601869
ENSMUSG00000000530	E016	Acvrl1	-0.153921	0.927798
ENSMUSG00000000530	E017	Acvrl1	-0.446409	0.525063
ENSMUSG00000000530	E018	Acvrl1	-0.242398	0.586583
ENSMUSG00000000530	E019	Acvrl1	0.0987618	0.74988
ENSMUSG00000000530	E020	Acvrl1
ENSMUSG00000000530	E021	Acvrl1	0.101675	0.572903
ENSMUSG00000000530	E022	Acvrl1	0.270073	0.227115
ENSMUSG00000000530	E023	Acvrl1	0.155481	0.467506
ENSMUSG00000000530	E024	Acvrl1	0.107539	0.460528
ENSMUSG00000000530	E025	Acvrl1	0.037801	0.778527			0.0161699	0.991538
ENSMUSG00000000530	E026	Acvrl1	-0.0560451	0.842853
ENSMUSG00000000530	E027	Acvrl1	-0.0420445	0.839014			-5.90033e-05	0.951515
ENSMUSG00000000530	E028	Acvrl1	-0.0629796	0.834848
ENSMUSG00000000530	E029	Acvrl1
ENSMUSG00000000530	E030	Acvrl1	-0.0203452	0.954069
ENSMUSG00000000530	E031	Acvrl1	-0.108871	0.827556
ENSMUSG00000000530	E032	Acvrl1	-0.0820946	0.876714
ENSMUSG00000000530	E033	Acvrl1	-0.377493	0.0424558			-0.0283966	0.921591
ENSMUSG00000000531	E001	Grasp	-0.177441	0.253491	0.0321364	0.999962	-0.0920282	0.542438	0.313587	0.378397	0.336765	0.322341
ENSMUSG00000000531	E002	Grasp	-0.107368	0.298923			-0.0400662	0.837585			0.210137	0.291532
ENSMUSG00000000531	E003	Grasp	-0.0579535	0.60682	-0.0191124	0.999962	-0.0442419	0.831398	0.131008	0.600196	0.114826	0.660708
ENSMUSG00000000531	E004	Grasp	0.0356835	0.193734	0.0306751	0.999962	-0.000795536	0.443757	0.00258186	0.831093	-0.00656028	0.748315
ENSMUSG00000000531	E005	Grasp	0.0807028	0.0227551	0.029061	0.999962	0.055109	0.0496646	-0.0480308	0.54059	-0.0578692	0.467329
ENSMUSG00000000531	E006	Grasp	0.0160813	0.462194	-0.0114719	0.999962	0.02904	0.193463	-0.00965716	0.758267	-0.0625066	0.318655
ENSMUSG00000000531	E007	Grasp	0.00387094	0.669834	-0.00214806	0.999962	0.0116374	0.594141	-0.0627412	0.376935	-0.0818881	0.250003
ENSMUSG00000000531	E008	Grasp	-0.0199448	0.925311	-0.0564629	0.999962	-0.0656827	0.423075	-0.024944	0.451911	-0.0205849	0.58691
ENSMUSG00000000532	E001	Acvr1b	0.230901	0.0234718			0.147675	0.291458	0.0135682	0.983066	0.00234183	0.986018
ENSMUSG00000000532	E002	Acvr1b	0.133962	0.00274152	0.0397033	0.999962	0.0715828	0.272286	-0.0131897	0.930456	-0.045299	0.650987
ENSMUSG00000000532	E003	Acvr1b	0.078758	0.000470328	0.0338333	0.999962	0.0122553	0.854123	0.00415531	0.955722	-0.00930489	0.914006
ENSMUSG00000000532	E004	Acvr1b	0.0169068	0.571918	-0.00295773	0.999962	-0.0217105	0.730485	0.00305476	0.966145	0.0175426	0.863298
ENSMUSG00000000532	E005	Acvr1b	0.0212002	0.516014	-0.00014626	0.999962	-0.0294706	0.49952	-0.0216395	0.733907	0.00209827	0.982325
ENSMUSG00000000532	E006	Acvr1b	0.0630061	0.0028981	0.000643034	0.999962	0.020046	0.658994	-0.00743843	0.963791	0.0190578	0.623914
ENSMUSG00000000532	E007	Acvr1b	0.0179425	0.711897	-0.0162755	0.999962	-0.002743	0.9536	-0.004597	0.999784	-0.00475064	0.975142
ENSMUSG00000000532	E008	Acvr1b	0.0390121	0.181446	0.0100376	0.999962	0.00923192	0.909374	-0.00649364	0.985047	-0.0100777	0.900283
ENSMUSG00000000532	E009	Acvr1b	-0.0657199	2.52991e-27	-0.0224547	0.999962	-0.0101748	0.624956	0.0194344	0.84543	-0.000447383	0.997209
ENSMUSG00000000538	E001	Tom1l2
ENSMUSG00000000538	E002	Tom1l2	-0.173794	2.30224e-37	-0.0118263	0.999962	-0.0931099	0.000115308	0.0347935	0.735409	0.00809793	0.599614
ENSMUSG00000000538	E003	Tom1l2	-0.0497608	0.957215	-0.0121366	0.999962	-0.0539683	0.285413	-0.00409437	0.84111	-0.00778907	0.885864
ENSMUSG00000000538	E004	Tom1l2	-0.000618457	0.0773848	-0.0137813	0.999962	-0.0108659	0.535847	0.00808351	0.987493	0.0228895	0.633819
ENSMUSG00000000538	E005	Tom1l2	0.151585	2.38452e-05			0.0259789	0.493555	0.0696562	0.551692	0.131664	0.0812993
ENSMUSG00000000538	E006	Tom1l2	0.0854943	0.605307
ENSMUSG00000000538	E007	Tom1l2	0.466277	2.22607e-12			-0.0670609	0.93043			-0.0958107	0.564703
ENSMUSG00000000538	E008	Tom1l2	0.616573	2.04979e-06
ENSMUSG00000000538	E009	Tom1l2	-1.02501	0.00542134
ENSMUSG00000000538	E010	Tom1l2	0.00687061	0.847389
ENSMUSG00000000538	E011	Tom1l2	0.0330138	0.784769
ENSMUSG00000000538	E012	Tom1l2	0.00150865	0.92867
ENSMUSG00000000538	E013	Tom1l2
ENSMUSG00000000538	E014	Tom1l2	-0.0374162	0.69428	-0.0266744	0.999962	-0.0283347	0.950535	0.0029368	0.981018	0.0230889	0.845898
ENSMUSG00000000538	E015	Tom1l2	0.0212154	0.0801984	-0.0102012	0.999962	0.0065062	0.55395	-0.00227061	0.939913	0.0458403	0.363272
ENSMUSG00000000538	E016	Tom1l2	0.0927172	1.66452e-06	0.026181	0.999962	0.0729814	0.00679925	-0.0222505	0.802625	0.00517281	0.893726
ENSMUSG00000000538	E017	Tom1l2	0.0844934	4.74305e-06	0.0373765	0.999962	0.092939	0.000513245	-0.0317913	0.693108	-0.0294629	0.796975
ENSMUSG00000000538	E018	Tom1l2	0.0511303	0.00338544	0.000433653	0.999962	0.052462	0.0539145	-0.0730976	0.426807	-0.120501	0.0340245
ENSMUSG00000000538	E019	Tom1l2	0.0218446	0.0163125	0.0154087	0.999962	0.0388012	0.0285574	-0.0345952	0.644758	-0.0671627	0.206663
ENSMUSG00000000538	E020	Tom1l2	0.26592	0.44108
ENSMUSG00000000538	E021	Tom1l2	-0.0816766	0.985321
ENSMUSG00000000538	E022	Tom1l2	0.0101356	0.114042	0.0279071	0.999962	0.034905	0.167882	-0.0200285	0.729277	-0.0402105	0.511956
ENSMUSG00000000538	E023	Tom1l2	0.0527739	3.8101e-08	0.0224924	0.999962	0.0279853	0.0397583	-0.0159688	0.723508	0.0287828	0.281179
ENSMUSG00000000538	E024	Tom1l2	0.066594	7.28409e-09	-0.00239761	0.999962	0.0203581	0.0580926	0.016415	0.947655	0.0247932	0.426373
ENSMUSG00000000538	E025	Tom1l2	0.0562599	0.00188194	0.0169409	0.999962	0.0378173	0.108958	0.0313429	0.929498	-0.0479201	0.336896
ENSMUSG00000000538	E026	Tom1l2	0.0637511	0.0533986	7.53453e-05	0.999962	0.041035	0.434865	0.012191	0.968317	-0.0823068	0.220855
ENSMUSG00000000538	E027	Tom1l2	0.0904551	2.37211e-07	0.0179061	0.999962	0.0593496	0.0315878	0.0168496	0.98723	-0.0082611	0.994342
ENSMUSG00000000538	E028	Tom1l2	0.0808721	0.000413503	-0.0281581	0.999962	0.0354454	0.321715	-0.00128427	0.954406	-0.00122437	0.970382
ENSMUSG00000000544	E001	Gpa33
ENSMUSG00000000544	E002	Gpa33
ENSMUSG00000000544	E003	Gpa33
ENSMUSG00000000544	E004	Gpa33
ENSMUSG00000000544	E005	Gpa33
ENSMUSG00000000544	E006	Gpa33
ENSMUSG00000000544	E007	Gpa33
ENSMUSG00000000544	E008	Gpa33	-0.439527	0.283241
ENSMUSG00000000544	E009	Gpa33	-0.0414282	0.900877
ENSMUSG00000000544	E010	Gpa33	-0.00368658	0.991965
ENSMUSG00000000544	E011	Gpa33	0.0121788	0.9558
ENSMUSG00000000544	E012	Gpa33	-0.00076467	0.996242
ENSMUSG00000000544	E013	Gpa33	0.1398	0.634588
ENSMUSG00000000544	E014	Gpa33	0.042252	0.799121
ENSMUSG00000000544	E015	Gpa33
ENSMUSG00000000552	E001	Zfp385a	0.014361	0.681278	0.0124172	0.999962	0.0762827	0.0664891	0.0688018	0.0216336	0.0779663	0.175993
ENSMUSG00000000552	E002	Zfp385a	0.108653	0.00452582	0.0134218	0.999962	0.126139	0.000928641	-0.0191885	0.900848	-0.0450932	0.575948
ENSMUSG00000000552	E003	Zfp385a	0.0655122	0.0394662	-0.00922613	0.999962	0.038968	0.551121	-0.0166545	0.899868	0.0224175	0.783315
ENSMUSG00000000552	E004	Zfp385a	-0.0206978	0.594243	0.00957879	0.999962	-0.075803	0.0754317	-0.0376484	0.654261	0.0166954	0.835425
ENSMUSG00000000552	E005	Zfp385a	-0.0485321	0.0805615	0.0190282	0.999962	-0.0592185	0.0261201	-0.0234409	0.854716	-0.0215929	0.807562
ENSMUSG00000000552	E006	Zfp385a	-0.0817649	0.192018	-0.0388801	0.999962	-0.0918503	0.12203	-0.0208333	0.899926	-0.0914225	0.352426
ENSMUSG00000000552	E007	Zfp385a	0.015389	0.897651	-0.0395051	0.999962	-0.0498595	0.245256	-0.0182547	0.940856	-0.0797352	0.407708
ENSMUSG00000000552	E008	Zfp385a	-0.245176	7.33894e-05			-0.0240493	0.790752
ENSMUSG00000000555	E001	Itga5	-0.256237	0.0254061				0.994987
ENSMUSG00000000555	E002	Itga5	-0.263188	0.0978173
ENSMUSG00000000555	E003	Itga5	-0.236167	0.20554
ENSMUSG00000000555	E004	Itga5	-0.0484186	0.837475
ENSMUSG00000000555	E005	Itga5	0.125594	0.612147
ENSMUSG00000000555	E006	Itga5	0.0858118	0.698073
ENSMUSG00000000555	E007	Itga5	-0.00266364	0.972435
ENSMUSG00000000555	E008	Itga5	-0.0881774	0.670002
ENSMUSG00000000555	E009	Itga5	-0.0667956	0.754173
ENSMUSG00000000555	E010	Itga5	-0.0360186	0.956456
ENSMUSG00000000555	E011	Itga5	0.0713694	0.751445
ENSMUSG00000000555	E012	Itga5	0.185361	0.654209
ENSMUSG00000000555	E013	Itga5	0.101549	0.697547
ENSMUSG00000000555	E014	Itga5	0.175692	0.41365
ENSMUSG00000000555	E015	Itga5	-0.0866037	0.714405
ENSMUSG00000000555	E016	Itga5	0.211554	0.238399
ENSMUSG00000000555	E017	Itga5	0.193789	0.430835
ENSMUSG00000000555	E018	Itga5	0.0119641	0.999728
ENSMUSG00000000555	E019	Itga5	-0.0151406	0.871079
ENSMUSG00000000555	E020	Itga5	0.125403	0.799929
ENSMUSG00000000555	E021	Itga5	-0.0565478	0.847136
ENSMUSG00000000555	E022	Itga5	-0.187161	0.583431
ENSMUSG00000000555	E023	Itga5	-0.200202	0.415934
ENSMUSG00000000555	E024	Itga5	-0.0302513	0.900502
ENSMUSG00000000555	E025	Itga5	-0.0305562	0.927269
ENSMUSG00000000555	E026	Itga5	-0.149664	0.513696
ENSMUSG00000000555	E027	Itga5	0.097825	0.712566
ENSMUSG00000000555	E028	Itga5	0.0362286	0.920182
ENSMUSG00000000555	E029	Itga5	0.277428	0.202423
ENSMUSG00000000555	E030	Itga5	0.434315	0.046978
ENSMUSG00000000560	E001	Gabra2	-0.0714393	3.28221e-06	-0.0364165	0.999962	-0.0227152	0.423929	-0.00341774	0.874639	0.0168297	0.240119
ENSMUSG00000000560	E002	Gabra2	0.0172621	0.416619	-0.0207892	0.999962	-0.00756067	0.922188	0.00536783	0.96162	-0.0127164	0.632724
ENSMUSG00000000560	E003	Gabra2	0.0333576	0.335065	0.0378062	0.999962	0.011513	0.877834	-0.00183715	0.975574	0.0227745	0.630392
ENSMUSG00000000560	E004	Gabra2	0.0324088	0.285749	0.0280972	0.999962	0.00952187	0.909931	-0.00070618	0.996267	0.0321204	0.506547
ENSMUSG00000000560	E005	Gabra2	0.0124838	0.703499			-0.000855987	0.997245	0.0212176	0.888314	0.0452397	0.475157
ENSMUSG00000000560	E006	Gabra2	0.00690471	0.739448	0.00786865	0.999962	0.0279512	0.715922	0.0186324	0.847414	-0.00583861	0.834028
ENSMUSG00000000560	E007	Gabra2	0.0272396	0.784754			0.0509233	0.618968	0.0165694	0.897713	-0.0566774	0.589919
ENSMUSG00000000560	E008	Gabra2	0.0723453	0.136894			0.0533829	0.591169	-0.0368139	0.771392	-0.0523503	0.340727
ENSMUSG00000000560	E009	Gabra2	0.0463533	0.439482			0.00126333	0.989844	-0.0972693	0.721775	-0.118747	0.027727
ENSMUSG00000000560	E010	Gabra2	0.0501084	0.816245			-0.101535	0.688674	-0.159086	0.746023	-0.214781	0.422254
ENSMUSG00000000561	E001	Wdr77
ENSMUSG00000000561	E002	Wdr77
ENSMUSG00000000561	E003	Wdr77
ENSMUSG00000000561	E004	Wdr77	0.152363	0.882881
ENSMUSG00000000561	E005	Wdr77	0.200604	0.733992
ENSMUSG00000000561	E006	Wdr77	0.334167	0.00104926			0.158503	0.342781
ENSMUSG00000000561	E007	Wdr77	0.352497	0.000126807			0.195644	0.187281
ENSMUSG00000000561	E008	Wdr77	0.162179	0.0732182			0.0719861	0.473622			0.042178	0.92264
ENSMUSG00000000561	E009	Wdr77	0.0583172	0.336345			0.00858551	0.895303
ENSMUSG00000000561	E010	Wdr77	0.114741	0.218193			0.0865666	0.505774
ENSMUSG00000000561	E011	Wdr77	0.0213199	0.45919			0.0267511	0.732191			-0.161919	0.152745
ENSMUSG00000000561	E012	Wdr77	0.0276448	0.331683			0.0371867	0.518461			-0.204835	0.0384585
ENSMUSG00000000561	E013	Wdr77	0.0105366	0.423793	0.0169352	0.999962	0.0184904	0.671573			-0.0599079	0.534021
ENSMUSG00000000561	E014	Wdr77	-0.0454395	0.9979
ENSMUSG00000000561	E015	Wdr77	0.0127906	0.353867	0.00616751	0.999962	0.00367591	0.833431	-0.0124672	0.927968	0.030794	0.965489
ENSMUSG00000000561	E016	Wdr77	0.0258554	0.426932			0.0223358	0.688636			0.00357387	0.963554
ENSMUSG00000000561	E017	Wdr77	0.130757	0.2988
ENSMUSG00000000561	E018	Wdr77	-0.0459496	0.98498
ENSMUSG00000000561	E019	Wdr77	0.0563287	0.615256
ENSMUSG00000000561	E020	Wdr77	-0.0535406	0.839332	-0.0190583	0.999962	-0.00954674	0.979542	0.0291746	0.956183	0.0438619	0.904201
ENSMUSG00000000561	E021	Wdr77	-0.0465683	0.870457	-0.00201132	0.999962	-0.0235979	0.860008	-0.0257201	0.771165	0.0159109	0.966988
ENSMUSG00000000561	E022	Wdr77	-0.139406	0.0939066	-0.00842218	0.999962	-0.0709585	0.458008	0.00566194	0.969668	0.0887781	0.57992
ENSMUSG00000000561	E023	Wdr77	-0.17452	0.0723196	0.00877886	0.999962	-0.0606628	0.435078	0.0436072	0.963306	0.101685	0.730643
ENSMUSG00000000561	E024	Wdr77	-0.0960021	0.915081
ENSMUSG00000000561	E025	Wdr77	0.549615	0.0203273
ENSMUSG00000000561	E026	Wdr77
ENSMUSG00000000562	E001	Adora3
ENSMUSG00000000562	E002	Adora3	-0.0295948	0.786468
ENSMUSG00000000562	E003	Adora3	0.0251251	0.906216
ENSMUSG00000000562	E004	Adora3
ENSMUSG00000000563	E001	Atp5f1	0.140763	0.829437
ENSMUSG00000000563	E002	Atp5f1	-0.0506971	0.0439163	0.00974539	0.999962	-0.0196752	0.214533	-0.00902878	0.966621	-0.0280122	0.883647
ENSMUSG00000000563	E003	Atp5f1	-0.0236304	0.26839	0.00243049	0.999962	-0.00755529	0.488932	0.0114254	0.927365	-0.0167464	0.92649
ENSMUSG00000000563	E004	Atp5f1	-0.00252863	0.977805	0.000485744	0.999962	0.00408651	0.971496	0.00423088	0.993471	0.0185415	0.553763
ENSMUSG00000000563	E005	Atp5f1	-1.10271	0.069976
ENSMUSG00000000563	E006	Atp5f1	0.0100063	0.97168
ENSMUSG00000000563	E007	Atp5f1	0.0150835	0.875806	0.00833891	0.999962	0.0167611	0.539139	-0.00725119	0.990184	-0.0214434	0.945984
ENSMUSG00000000563	E008	Atp5f1	-0.0563636	0.90101
ENSMUSG00000000563	E009	Atp5f1	0.00301185	0.940146	-0.0193788	0.999962	0.0335945	0.622956	-0.02066	0.97358	-0.122182	0.366166
ENSMUSG00000000563	E010	Atp5f1	0.0542102	0.0746158	-0.0344358	0.999962	0.0223165	0.66878	-0.0101537	0.920989	-0.0576949	0.410899
ENSMUSG00000000563	E011	Atp5f1
ENSMUSG00000000563	E012	Atp5f1	0.0956194	0.869701
ENSMUSG00000000563	E013	Atp5f1	0.0615713	0.144045	-0.00717833	0.999962	0.0202147	0.795372	0.00867516	0.95217	0.0424658	0.361992
ENSMUSG00000000563	E014	Atp5f1	0.0362041	0.671985	-0.0201773	0.999962	-0.00875425	0.862653	-0.00181614	0.99196	0.047272	0.425356
ENSMUSG00000000563	E015	Atp5f1	-0.0558462	0.559311			-0.112915	0.106686			0.0745492	0.736619
ENSMUSG00000000563	E016	Atp5f1	0.0638417	0.721496			-0.0373694	0.870102
ENSMUSG00000000563	E017	Atp5f1	-0.169127	0.65626
ENSMUSG00000000563	E018	Atp5f1
ENSMUSG00000000567	E001	Sox9	0.211209	4.34012e-11			0.106993	0.0217588	0.0406469	0.905956	-0.00699986	0.718741
ENSMUSG00000000567	E002	Sox9	0.229472	3.06717e-06			0.106968	0.0452761	-0.0616684	0.539826	-0.0421601	0.502648
ENSMUSG00000000567	E003	Sox9	-0.157039	6.56928e-31		0.999962	-0.0704572	2.22558e-05	0.0282664	0.939895	0.0685471	0.537927
ENSMUSG00000000568	E001	Hnrnpd	0.135265	0.00765191	0.026793	0.999962	-0.0725183	0.150336	-0.038927	0.936999	0.0398928	0.556551
ENSMUSG00000000568	E002	Hnrnpd	0.13348	0.775921			-0.152846	0.310002	0.0693413	0.741901	0.188589	0.315833
ENSMUSG00000000568	E003	Hnrnpd	-0.0765113	0.551001			-0.2192	0.377409
ENSMUSG00000000568	E004	Hnrnpd	-0.089021	0.513208			-0.205188	0.426558
ENSMUSG00000000568	E005	Hnrnpd	0.0265263	0.900805			-0.0502921	0.791414	0.131791	0.387465	0.250742	0.0366674
ENSMUSG00000000568	E006	Hnrnpd	0.032177	0.898059			-0.00920684	0.993143			0.199537	0.168796
ENSMUSG00000000568	E007	Hnrnpd	-0.0396747	0.303387	0.0271139	0.999962	0.0012167	0.778096	0.0649272	0.677966	0.137231	0.138108
ENSMUSG00000000568	E008	Hnrnpd	-0.377214	0.259149
ENSMUSG00000000568	E009	Hnrnpd	-0.0923558	0.728539
ENSMUSG00000000568	E010	Hnrnpd	-0.474601	0.0745186
ENSMUSG00000000568	E011	Hnrnpd	-0.271575	0.129645
ENSMUSG00000000568	E012	Hnrnpd	0.0067745	0.984746	0.0360191	0.999962	0.0520917	0.0967545	0.0513735	0.763561	-0.0112665	0.632496
ENSMUSG00000000568	E013	Hnrnpd	-0.0776972	0.0203729	0.0120967	0.999962	0.00681621	0.794531	0.0505259	0.754472	0.0586315	0.78407
ENSMUSG00000000568	E014	Hnrnpd	-0.0292442	0.473284	-0.0294983	0.999962	0.0505056	0.266925	0.014379	0.959765	0.0122663	0.902741
ENSMUSG00000000568	E015	Hnrnpd	0.0185795	0.837359	-0.00864157	0.999962	0.0575755	0.0127659	0.0040331	0.972164	0.0148279	0.853381
ENSMUSG00000000568	E016	Hnrnpd	-8.85761e-05	0.867535	-0.022676	0.999962	0.000691244	0.722261	-0.0271713	0.683351	-0.0228764	0.384486
ENSMUSG00000000568	E017	Hnrnpd	-0.0284741	0.533887	-0.00392112	0.999962	0.00150151	0.843543	-0.0397298	0.715471	-0.0884005	0.121313
ENSMUSG00000000568	E018	Hnrnpd	-0.0444818	0.219328	0.000872533	0.999962	0.0196473	0.647978	-0.00944324	0.889424	-0.0398811	0.330861
ENSMUSG00000000568	E019	Hnrnpd	-0.0426656	0.350893	-0.0240336	0.999962	0.00355212	0.881252	-0.0228063	0.846593	-0.0738573	0.291532
ENSMUSG00000000568	E020	Hnrnpd	-0.000824854	0.66081	-0.0172394	0.999962	-0.000757677	0.715353	-0.0251372	0.900929	-0.0575096	0.461541
ENSMUSG00000000568	E021	Hnrnpd	0.0925839	0.337119	0.0133207	0.999962	0.0741533	0.0503407	-0.022745	0.933144	-0.0842321	0.354014
ENSMUSG00000000568	E022	Hnrnpd
ENSMUSG00000000568	E023	Hnrnpd	0.0256767	0.971274	-0.013399	0.999962	0.0047614	0.703608	-0.0103132	0.937427	-0.0494232	0.488604
ENSMUSG00000000568	E024	Hnrnpd	-0.0443597	0.288593	-0.0285657	0.999962	-0.0700642	0.353189	-0.0477463	0.645308	-0.0493793	0.498151
ENSMUSG00000000568	E025	Hnrnpd	-0.117831	0.174614			-0.112942	0.306048			-0.0967818	0.687723
ENSMUSG00000000568	E026	Hnrnpd	-0.0532581	0.56916			-0.0906154	0.541399			-0.166966	0.535051
ENSMUSG00000000568	E027	Hnrnpd	0.0791029	0.70259			-0.0403709	0.838358			-0.179711	0.440394
ENSMUSG00000000568	E028	Hnrnpd	0.172844	0.391856
ENSMUSG00000000568	E029	Hnrnpd	0.241896	0.348878
ENSMUSG00000000568	E030	Hnrnpd
ENSMUSG00000000568	E031	Hnrnpd
ENSMUSG00000000568	E032	Hnrnpd
ENSMUSG00000000568	E033	Hnrnpd	-0.360031	0.618285
ENSMUSG00000000568	E034	Hnrnpd
ENSMUSG00000000568	E035	Hnrnpd
ENSMUSG00000000568	E036	Hnrnpd
ENSMUSG00000000568	E037	Hnrnpd
ENSMUSG00000000579	E001	Dynlt1c	-0.22426	0.664767
ENSMUSG00000000579	E002	Dynlt1c	-0.414687	0.17526
ENSMUSG00000000579	E003	Dynlt1c	-0.485497	0.0308
ENSMUSG00000000579	E004	Dynlt1c	-0.476933	0.0122935
ENSMUSG00000000579	E005	Dynlt1c	-0.198228	0.589656
ENSMUSG00000000579	E006	Dynlt1c	-0.342033	0.0273995
ENSMUSG00000000579	E007	Dynlt1c	-0.192801	0.367005			-0.153744	0.538195
ENSMUSG00000000579	E008	Dynlt1c	-0.0356772	0.906986
ENSMUSG00000000579	E009	Dynlt1c	0.128101	0.431891
ENSMUSG00000000579	E010	Dynlt1c	0.163474	0.496775
ENSMUSG00000000579	E011	Dynlt1c	0.232229	2.26098e-05			0.0576053	0.367476				0.85357
ENSMUSG00000000579	E012	Dynlt1c	0.436152	0.313701
ENSMUSG00000000581	E001	C1d	0.32622	0.00489995			0.114587	0.463155
ENSMUSG00000000581	E002	C1d	0.261442	0.0172358			0.0905916	0.473689
ENSMUSG00000000581	E003	C1d	0.095467	0.2262	-0.00125567	0.999962	0.024539	0.858456	-0.0239184	0.938463	0.0494903	0.753926
ENSMUSG00000000581	E004	C1d	0.264419	0.449682
ENSMUSG00000000581	E005	C1d	0.0206311	0.539714	-0.00178289	0.999962	0.0114789	0.839711	-0.00243987	0.92832	-0.00413095	0.94329
ENSMUSG00000000581	E006	C1d
ENSMUSG00000000581	E007	C1d	0.0116673	0.963712			0.0275713	0.741518
ENSMUSG00000000581	E008	C1d	-0.0302943	0.864469	-0.0167436	0.999962	0.0192828	0.757251			-0.157182	0.253297
ENSMUSG00000000581	E009	C1d
ENSMUSG00000000581	E010	C1d	-0.0522016	0.674279	0.00221737	0.999962	0.00854045	0.836812			-0.0591585	0.650896
ENSMUSG00000000581	E011	C1d	-0.283242	0.73469
ENSMUSG00000000581	E012	C1d	-0.0456453	0.70575	-0.00147961	0.999962	0.0173492	0.712064			-0.0256433	0.902712
ENSMUSG00000000581	E013	C1d	-0.0397572	0.640547	0.0047224	0.999962	-0.00920692	0.947424	-0.00516867	0.928939	0.0203278	0.919382
ENSMUSG00000000581	E014	C1d	-0.0619784	0.120038	0.00316613	0.999962	-0.0824991	0.0573143	0.0145203	0.977154	0.0566585	0.452256
ENSMUSG00000000594	E001	Gm2a	0.127209	0.0233915			0.100555	0.0297076	-0.0404862	0.809381	0.00137128	0.863697
ENSMUSG00000000594	E002	Gm2a	0.0466987	0.0282703			0.0597027	0.077125	-0.0119933	0.858826	-0.0500126	0.123856
ENSMUSG00000000594	E003	Gm2a	0.0297494	0.0420622	-0.00200887	0.999962	-0.000781209	0.668407	-0.0122096	0.807393	-0.00861956	0.460371
ENSMUSG00000000594	E004	Gm2a	-0.1121	0.000134255	0.00195147	0.999962	-0.0838625	0.0191907	0.0381123	0.655869	0.0758063	0.311248
ENSMUSG00000000600	E001	Krit1	0.40412	1.0685e-06			0.249501	0.002336			-0.0879679	0.718412
ENSMUSG00000000600	E002	Krit1	0.119488	0.503399			0.130255	0.407996
ENSMUSG00000000600	E003	Krit1	0.204612	0.0268877			0.157443	0.0646834
ENSMUSG00000000600	E004	Krit1	0.109208	0.252809			0.00855235	0.933797			-0.0180792	0.936725
ENSMUSG00000000600	E005	Krit1	0.233518	0.000432467			0.0805473	0.356633			-0.0972722	0.424347
ENSMUSG00000000600	E006	Krit1	0.158854	0.0148049			0.0617697	0.476518			-0.0743421	0.565895
ENSMUSG00000000600	E007	Krit1	0.108241	0.049716			0.0505771	0.455573	-0.0469468	0.864345	0.00527804	0.976866
ENSMUSG00000000600	E008	Krit1	0.0536286	0.524692			0.0574494	0.462678			0.0254928	0.943797
ENSMUSG00000000600	E009	Krit1	0.0753012	0.294326			0.0655584	0.35428			-0.0485548	0.719289
ENSMUSG00000000600	E010	Krit1	0.0611062	0.384897			0.0365591	0.654977			0.0363475	0.893726
ENSMUSG00000000600	E011	Krit1	-0.0452422	0.596027			-0.0105132	0.959863			0.0176468	0.983809
ENSMUSG00000000600	E012	Krit1	-0.0290225	0.728718			-0.0352261	0.741286			0.0139162	0.989423
ENSMUSG00000000600	E013	Krit1	-0.116836	0.0796805			-0.114914	0.0977553			0.0431851	0.884527
ENSMUSG00000000600	E014	Krit1	-0.24835	3.24447e-05			-0.151459	0.0169801			0.103055	0.600488
ENSMUSG00000000600	E015	Krit1	-0.313245	0.00272296			-0.0744192	0.543648
ENSMUSG00000000600	E016	Krit1	-0.261586	0.000113772			-0.0931802	0.272405
ENSMUSG00000000600	E017	Krit1	-0.338252	0.000112601			-0.110665	0.278247
ENSMUSG00000000600	E018	Krit1	-0.149505	0.000467773		0.999962	-0.0967364	0.116556	0.0495699	0.691106	0.0407144	0.813054
ENSMUSG00000000605	E001	Clcn4	-0.221829	3.94274e-08	-0.0162963	0.999962	-0.0695108	0.0134205	0.028609	0.897713	0.0173927	0.842024
ENSMUSG00000000605	E002	Clcn4	-0.135226	0.000398749	-0.0148419	0.999962	-0.0475312	0.302886	-0.00206605	0.869571	-0.00239881	0.982247
ENSMUSG00000000605	E003	Clcn4	-0.0505435	0.606123	0.00727693	0.999962	-0.000319584	0.533873	0.0038289	0.95257	0.0078017	0.839159
ENSMUSG00000000605	E004	Clcn4	-0.0262085	0.386659	0.0151125	0.999962	-0.0106686	0.905929	0.00203198	0.97774	0.023061	0.753262
ENSMUSG00000000605	E005	Clcn4	0.00173639	0.00874039	0.0111688	0.999962	-0.0176804	0.994802	0.0116917	0.97819	0.0328761	0.102651
ENSMUSG00000000605	E006	Clcn4	0.0228272	9.11964e-05	-0.00397574	0.999962	-0.010357	0.900271	0.0247931	0.899343	0.00557103	0.946618
ENSMUSG00000000605	E007	Clcn4	0.0456492	7.44014e-08	-0.0309856	0.999962	-0.0148283	0.960154	0.00248573	0.947655	0.0217142	0.566412
ENSMUSG00000000605	E008	Clcn4	0.05536	0.000233389	-0.0376332	0.999962	-0.0173987	0.979954	0.0125074	0.989823	-0.00996571	0.964095
ENSMUSG00000000605	E009	Clcn4	0.124505	3.38396e-08	0.0533626	0.999962	0.0776834	0.00306128	-0.0210966	0.79	-0.0471058	0.646629
ENSMUSG00000000605	E010	Clcn4	0.206099	2.46214e-07	0.04848	0.999962	0.194954	0.00420093	-0.0415826	0.45002	-0.16814	0.010932
ENSMUSG00000000605	E011	Clcn4	0.20442	1.23495e-12	0.0177522	0.999962	0.155778	0.000240209	-0.0149769	0.887814	-0.131514	0.15626
ENSMUSG00000000605	E012	Clcn4	0.227812	2.25781e-10			0.172342	0.00583007	-0.0287853	0.816402	-0.138506	0.22892
ENSMUSG00000000605	E013	Clcn4	0.162628	0.0967595
ENSMUSG00000000606	E001	Vmn2r88
ENSMUSG00000000606	E002	Vmn2r88
ENSMUSG00000000606	E003	Vmn2r88
ENSMUSG00000000606	E004	Vmn2r88
ENSMUSG00000000606	E005	Vmn2r88
ENSMUSG00000000606	E006	Vmn2r88
ENSMUSG00000000606	E007	Vmn2r88
ENSMUSG00000000606	E008	Vmn2r88
ENSMUSG00000000606	E009	Vmn2r88
ENSMUSG00000000606	E010	Vmn2r88
ENSMUSG00000000606	E011	Vmn2r88
ENSMUSG00000000606	E012	Vmn2r88
ENSMUSG00000000606	E013	Vmn2r88
ENSMUSG00000000617	E001	Grm6
ENSMUSG00000000617	E002	Grm6
ENSMUSG00000000617	E003	Grm6
ENSMUSG00000000617	E004	Grm6
ENSMUSG00000000617	E005	Grm6
ENSMUSG00000000617	E006	Grm6
ENSMUSG00000000617	E007	Grm6
ENSMUSG00000000617	E008	Grm6
ENSMUSG00000000617	E009	Grm6
ENSMUSG00000000617	E010	Grm6
ENSMUSG00000000617	E011	Grm6
ENSMUSG00000000617	E012	Grm6
ENSMUSG00000000617	E013	Grm6
ENSMUSG00000000617	E014	Grm6
ENSMUSG00000000617	E015	Grm6
ENSMUSG00000000617	E016	Grm6
ENSMUSG00000000627	E001	Sema4f	-0.123255	0.00870563		0.999962	-0.0870472	0.0676287	0.0381886	0.961383	-0.0362401	0.437151
ENSMUSG00000000627	E002	Sema4f	-0.27671	0.0382769			-0.139982	0.281639
ENSMUSG00000000627	E003	Sema4f	-0.21177	0.0585946			-0.162633	0.107289			0.0616876	0.859763
ENSMUSG00000000627	E004	Sema4f	-0.279688	0.381768
ENSMUSG00000000627	E005	Sema4f	-0.085693	0.339943			-0.0834121	0.382256	0.0168543	0.996729	0.0352544	0.823316
ENSMUSG00000000627	E006	Sema4f
ENSMUSG00000000627	E007	Sema4f	-0.0566654	0.607593			-0.0761053	0.495753	0.0266013	0.961949	0.0321585	0.882379
ENSMUSG00000000627	E008	Sema4f	0.0991246	0.0419788			0.0675487	0.32476	0.0236093	0.986817	-0.00136011	0.963018
ENSMUSG00000000627	E009	Sema4f	0.116404	0.0178902			0.122186	0.0107202	0.0144289	0.992052	-0.0850028	0.354752
ENSMUSG00000000627	E010	Sema4f	0.122765	0.00307234			0.137721	0.00269499	-0.0607782	0.456198	-0.066247	0.418209
ENSMUSG00000000627	E011	Sema4f	0.0940697	0.0355669			0.124231	0.020025	-0.0308099	0.785696	-0.000505056	0.983227
ENSMUSG00000000627	E012	Sema4f	0.0379376	0.450733			0.047857	0.504838	-0.0377702	0.766998	0.0320964	0.842924
ENSMUSG00000000627	E013	Sema4f	-0.0121479	0.954357			-0.0451307	0.799986	-0.0169055	0.908651	-0.00329738	0.952858
ENSMUSG00000000627	E014	Sema4f	-0.00832161	0.889352			-0.0761216	0.634953			0.0340086	0.958049
ENSMUSG00000000627	E015	Sema4f	0.00286195	0.815067			-0.034711	0.960038			0.144154	0.555924
ENSMUSG00000000627	E016	Sema4f	0.00479475	0.78916			-0.02726	0.986113			0.141627	0.572366
ENSMUSG00000000627	E017	Sema4f	-0.0821592	0.861695			-0.0871681	0.862186			0.267793	0.638165
ENSMUSG00000000628	E001	Hk2
ENSMUSG00000000628	E002	Hk2	-0.831922	0.0240005
ENSMUSG00000000628	E003	Hk2	-0.665076	1.54656e-05
ENSMUSG00000000628	E004	Hk2	-0.658078	0.00119375
ENSMUSG00000000628	E005	Hk2	-0.429755	0.00191693
ENSMUSG00000000628	E006	Hk2	0.147472	0.671735
ENSMUSG00000000628	E007	Hk2	0.129808	0.720032
ENSMUSG00000000628	E008	Hk2	0.417844	0.18982
ENSMUSG00000000628	E009	Hk2	0.1908	0.490128
ENSMUSG00000000628	E010	Hk2	0.206958	0.517275
ENSMUSG00000000628	E011	Hk2	0.264226	0.399175
ENSMUSG00000000628	E012	Hk2	0.193515	0.498752
ENSMUSG00000000628	E013	Hk2	-0.0553973	0.886956
ENSMUSG00000000628	E014	Hk2	0.321937	0.123253
ENSMUSG00000000628	E015	Hk2	0.456477	0.0905762
ENSMUSG00000000628	E016	Hk2	0.745874	0.0130232
ENSMUSG00000000628	E017	Hk2	0.552135	0.0497771
ENSMUSG00000000628	E018	Hk2	0.00356387	0.979881
ENSMUSG00000000628	E019	Hk2	-0.0740944	0.90824
ENSMUSG00000000628	E020	Hk2	-0.128773	0.792741
[truncated: 354,135+ more rows]
