# Supplementary material for: Ethanol-Induced Behavioral Sensitization Alters the Synaptic Transcriptome and Exon Utilization in DBA/2J Mice
Source: Front Genet. 2018 Sep 24;9:402. doi: 10.3389/fgene.2018.00402 (PMC6166094; doi:10.3389/fgene.2018.00402)
Supplement: TABLE S10 — EEP_SSP or SEP_SSP regulated exon genes (RNA-Seq, DEXSeq, padj < 0.01), ToppFun functional enrichment analysis summary. [file Table_10.xlsx]

## Sheet: Table S10
Supplemental Table S10: EEP_SSP or SEP_SSP Regulated Exon Genes (RNA-Seq, DEXSeq, padj < .01), ToppFun Functional Enrichment Analysis Summary
EEP_SSP: Gene List		EEP_SSP: ToppFun Analysis												SEP_SSP: Gene List		SEP_SSP: ToppFun Analysis
Gene Symbol		Category	ID	Name	Source	p-value	q-value Bonferroni	q-value FDR B&H	q-value FDR B&Y	Hit Count in Query List	Hit Count in Genome	Hit in Query List		Gene Symbol		Category	ID	Name	Source	p-value	q-value Bonferroni	q-value FDR B&H	q-value FDR B&Y	Hit Count in Query List	Hit Count in Genome	Hit in Query List
Dazap2		GO: Molecular Function	GO:0008092	cytoskeletal protein binding		7.905e-15	1.02e-11	1.02e-11	7.893e-11	86	886	GPHN,KLHL2,RAB11B,PDE4B,MAP1A,MAP2,MAP4,MAPT,RPS3,CFL1,GABARAP,SKA2,RABGAP1,PFN2,FMNL2,HNRNPK,ADD1,MKL2,CLTC,ALDOC,SDCBP,VBP1,CAP2,HSP90AA1,EZR,EVL,SORBS2,ANK2,ANK3,NEBL,ATCAY,APC,GAS7,SORBS1,RAB14,RAB6B,MAPRE1,PPP2CA,SIRT2,CCT5,DYNLL2,PARVA,LIMCH1,FUS,ATP1A1,SNCA,BRSK1,FYN,TOR1AIP1,SNX5,MYH10,MYO5A,MYO6,MYO10,SPTAN1,SPTBN1,KIF1B,HSPH1,MAP1LC3A,JMY,MPRIP,SYN1,DLG1,GMFB,KIF5B,KIF5C,MAP1LC3B,CAMSAP…		Vmp1		GO: Molecular Function	GO:0008574	ATP-dependent microtubule motor activity, plus-end-directed		0.0005106	0.1128	0.07076	0.423	2	17	KIF5A,KIF5B
Ndufa9		GO: Molecular Function	GO:0017111	nucleoside-triphosphatase activity		1.34e-13	1.729e-10	8.644e-11	6.69e-10	77	785	RAB11B,ABCA3,ABCF1,CHD3,TUBA1B,ATP8A1,ATP6V1D,DDX54,ATP5PD,HSPA8,VCP,HSP90AA1,PCYOX1,IPO8,RAB14,RAB6B,ARF1,ARHGAP5,ARL1,ATP6V1H,CHD5,ATP6V0E2,DYNLL2,EIF5B,DYNLL1,ATP1A1,ATP1A2,RAB21,ATP2A2,ATP2B1,YME1L1,ATP2B2,ATP5F1A,ATP5F1B,ATP5PF,ATP6V1C1,ATP6V1E1,MYH10,ATP6V0B,ATP6V1G2,ATP6AP1,ATRX,MYO5A,MYO6,MYO10,VPS4A,KIF1B,PSMC6,DHX9,TUBA1A,AFG3L2,KIF5B,KIF5C,DNM1,GNB2,RAB6A,DYNC1H1,DYNC1I2,RAC1,KRAS,RAP1…		Tlk2		GO: Molecular Function	GO:1990939	ATP-dependent microtubule motor activity		0.0006404	0.1415	0.07076	0.423	2	19	KIF5A,KIF5B
Rpl13		GO: Molecular Function	GO:0016462	pyrophosphatase activity		7.062e-13	9.11e-10	2.194e-10	1.698e-09	78	827	RAB11B,ABCA3,ABCF1,CHD3,TUBA1B,ATP8A1,ATP6V1D,DDX54,ATP5PD,HSPA8,VCP,HSP90AA1,PCYOX1,IPO8,RAB14,RAB6B,ARF1,ARHGAP5,ARL1,ATP6V1H,CHD5,ATP6V0E2,DYNLL2,EIF5B,DYNLL1,ATP1A1,ATP1A2,RAB21,ATP2A2,ATP2B1,YME1L1,ATP2B2,ATP5F1A,ATP5F1B,ATP5PF,ATP6V1C1,ATP6V1E1,MYH10,ATP6V0B,ATP6V1G2,ATP6AP1,ATRX,MYO5A,MYO6,MYO10,VPS4A,KIF1B,PSMC6,DHX9,TUBA1A,AFG3L2,KIF5B,KIF5C,DNM1,GNB2,RAB6A,DYNC1H1,DYNC1I2,RAC1,KRAS,RAP1…		Aldh6a1		GO: Molecular Function	GO:0005088	Ras guanyl-nucleotide exchange factor activity		0.001114	0.2462	0.08208	0.4906	4	232	GRIN1,PDGFRA,KALRN,ITSN1
Rpa1		GO: Molecular Function	GO:0016818	hydrolase activity, acting on acid anhydrides, in phosphorus-containing anhydrides		7.995e-13	1.031e-09	2.194e-10	1.698e-09	78	829	RAB11B,ABCA3,ABCF1,CHD3,TUBA1B,ATP8A1,ATP6V1D,DDX54,ATP5PD,HSPA8,VCP,HSP90AA1,PCYOX1,IPO8,RAB14,RAB6B,ARF1,ARHGAP5,ARL1,ATP6V1H,CHD5,ATP6V0E2,DYNLL2,EIF5B,DYNLL1,ATP1A1,ATP1A2,RAB21,ATP2A2,ATP2B1,YME1L1,ATP2B2,ATP5F1A,ATP5F1B,ATP5PF,ATP6V1C1,ATP6V1E1,MYH10,ATP6V0B,ATP6V1G2,ATP6AP1,ATRX,MYO5A,MYO6,MYO10,VPS4A,KIF1B,PSMC6,DHX9,TUBA1A,AFG3L2,KIF5B,KIF5C,DNM1,GNB2,RAB6A,DYNC1H1,DYNC1I2,RAC1,KRAS,RAP1…		Zdhhc20		GO: Molecular Function	GO:0016887	ATPase activity		0.001769	0.391	0.08446	0.5049	5	446	KIF5A,KIF5B,ATP1A1,ATRX,ATP2A2
Dnajc5		GO: Molecular Function	GO:0016817	hydrolase activity, acting on acid anhydrides		8.504e-13	1.097e-09	2.194e-10	1.698e-09	78	830	RAB11B,ABCA3,ABCF1,CHD3,TUBA1B,ATP8A1,ATP6V1D,DDX54,ATP5PD,HSPA8,VCP,HSP90AA1,PCYOX1,IPO8,RAB14,RAB6B,ARF1,ARHGAP5,ARL1,ATP6V1H,CHD5,ATP6V0E2,DYNLL2,EIF5B,DYNLL1,ATP1A1,ATP1A2,RAB21,ATP2A2,ATP2B1,YME1L1,ATP2B2,ATP5F1A,ATP5F1B,ATP5PF,ATP6V1C1,ATP6V1E1,MYH10,ATP6V0B,ATP6V1G2,ATP6AP1,ATRX,MYO5A,MYO6,MYO10,VPS4A,KIF1B,PSMC6,DHX9,TUBA1A,AFG3L2,KIF5B,KIF5C,DNM1,GNB2,RAB6A,DYNC1H1,DYNC1I2,RAC1,KRAS,RAP1…		Tsc22d1		GO: Molecular Function	GO:0015085	calcium ion transmembrane transporter activity		0.002255	0.4983	0.08446	0.5049	3	132	GRIN1,ATP2A2,JPH3
Hip1r		GO: Molecular Function	GO:0019900	kinase binding		9.804e-12	1.265e-08	2.108e-09	1.632e-08	67	691	ACACA,MAPT,RPS3,RPS6,RPS19,SLC12A5,WWC2,KIDINS220,CLTC,PPME1,AKT1,SDC4,MOB4,HSP90AA1,EZR,ANK2,GLRX3,ZBTB4,APC,SORBS1,ATF2,YWHAZ,PPP1CC,PPP2CA,ARHGDIA,ARRB1,RGS20,ELMO2,PRKACA,PRKAR1A,PRKCZ,CTNNB1,ATP1A1,BRSK1,NELL2,SNAP91,SYN1,DLG1,DLG4,KIF5B,DNM1,RAC1,NPM1,CACNB1,CALM1,CALM2,NSF,CAMK2B,NTRK2,GRB2,SPAG9,CAV2,LDHB,NCS1,EEF1A1,EEF1A2,GSTM5,GSTP1,TRAP1,THY1,PEBP1,PAK2,SPRED1,EMP2,CDC42,MAPK8IP2,CHP1		Pabpc1		GO: Molecular Function	GO:0043548	phosphatidylinositol 3-kinase binding		0.002571	0.5682	0.08446	0.5049	2	38	ATP1A1,PDGFRA
Chtop		GO: Molecular Function	GO:0019901	protein kinase binding		1.68e-11	2.167e-08	3.095e-09	2.396e-08	62	620	MAPT,RPS3,RPS6,RPS19,SLC12A5,KIDINS220,CLTC,PPME1,AKT1,SDC4,HSP90AA1,EZR,ANK2,GLRX3,ZBTB4,APC,SORBS1,ATF2,YWHAZ,PPP1CC,PPP2CA,ARHGDIA,ARRB1,RGS20,ELMO2,PRKACA,PRKAR1A,PRKCZ,CTNNB1,ATP1A1,BRSK1,NELL2,SNAP91,SYN1,DLG1,DLG4,KIF5B,DNM1,RAC1,NPM1,CACNB1,CALM1,CALM2,NSF,CAMK2B,NTRK2,GRB2,SPAG9,CAV2,NCS1,EEF1A1,EEF1A2,GSTM5,GSTP1,TRAP1,THY1,PEBP1,PAK2,SPRED1,EMP2,CDC42,MAPK8IP2		Senp2		GO: Molecular Function	GO:0015662	ATPase activity, coupled to transmembrane movement of ions, phosphorylative mechanism		0.002845	0.6288	0.08446	0.5049	2	40	ATP1A1,ATP2A2
Calm1		GO: Molecular Function	GO:0015399	primary active transmembrane transporter activity		3.594e-11	4.636e-08	5.151e-09	3.987e-08	24	119	ABCA3,TIMM23,ATP8A1,ATP6V1D,TIMM17A,PCYOX1,IPO8,ATP6V1H,ATP6V0E2,ATP1A1,ATP1A2,ATP2A2,ATP2B1,ATP2B2,ATP5F1A,ATP5F1B,ATP6V1C1,ATP6V1E1,ATP6V0B,ATP6V1G2,ATP6AP1,TOMM20,ABCA5,ATP6V0A2		Itsn1		GO: Molecular Function	GO:0005085	guanyl-nucleotide exchange factor activity		0.003057	0.6757	0.08446	0.5049	4	306	GRIN1,PDGFRA,KALRN,ITSN1
Pfdn5		GO: Molecular Function	GO:0015405	P-P-bond-hydrolysis-driven transmembrane transporter activity		3.594e-11	4.636e-08	5.151e-09	3.987e-08	24	119	ABCA3,TIMM23,ATP8A1,ATP6V1D,TIMM17A,PCYOX1,IPO8,ATP6V1H,ATP6V0E2,ATP1A1,ATP1A2,ATP2A2,ATP2B1,ATP2B2,ATP5F1A,ATP5F1B,ATP6V1C1,ATP6V1E1,ATP6V0B,ATP6V1G2,ATP6AP1,TOMM20,ABCA5,ATP6V0A2		Vti1a		GO: Molecular Function	GO:0072509	divalent inorganic cation transmembrane transporter activity		0.004827	1	0.1173	0.7012	3	173	GRIN1,ATP2A2,JPH3
Mef2d		GO: Molecular Function	GO:0016887	ATPase activity		3.077e-10	3.969e-07	3.969e-08	3.072e-07	48	446	ABCA3,ABCF1,CHD3,ATP8A1,ATP6V1D,DDX54,ATP5PD,HSPA8,VCP,HSP90AA1,PCYOX1,IPO8,ATP6V1H,CHD5,ATP6V0E2,ATP1A1,ATP1A2,ATP2A2,ATP2B1,YME1L1,ATP2B2,ATP5F1A,ATP5F1B,ATP5PF,ATP6V1C1,ATP6V1E1,MYH10,ATP6V0B,ATP6V1G2,ATP6AP1,ATRX,MYO10,VPS4A,KIF1B,PSMC6,DHX9,AFG3L2,KIF5B,KIF5C,DYNC1H1,NSF,ATP9A,KIF3A,G3BP1,ABCA5,EIF4A2,CRBN,ATP6V0A2		Huwe1		GO: Molecular Function	GO:0015616	DNA translocase activity		0.005937	1	0.1173	0.7012	1	3	ATRX
Npepps		GO: Molecular Function	GO:0003735	structural constituent of ribosome		4.883e-10	6.299e-07	5.727e-08	4.432e-07	31	216	RPL30,RPL27A,RPL35A,RPL36A,RPS3,RPS5,RPS6,RPS15,RPS15A,RPS17,RPS19,RPS21,RPS23,RPS24,RPL23,RPL7L1,SLC25A23,SLC25A22,RPL13A,RPL3,RPL4,RPL5,RPL6,RPL7A,RPL9,RPL11,RPL12,RPL13,RPL17,RPL18,RPL19		Jph3		GO: Molecular Function	GO:0005017	platelet-derived growth factor-activated receptor activity		0.005937	1	0.1173	0.7012	1	3	PDGFRA
Tcf25		GO: Molecular Function	GO:0019829	cation-transporting ATPase activity		1.492e-09	1.924e-06	1.604e-07	1.241e-06	16	62	ATP8A1,ATP6V1H,ATP6V0E2,ATP1A1,ATP1A2,ATP2A2,ATP2B1,ATP2B2,ATP5F1A,ATP5F1B,ATP6V1C1,ATP6V1E1,ATP6V0B,ATP6V1G2,ATP6AP1,ATP6V0A2		Map4k4		GO: Molecular Function	GO:0019829	cation-transporting ATPase activity		0.006712	1	0.1173	0.7012	2	62	ATP1A1,ATP2A2
Ergic1		GO: Molecular Function	GO:0042626	ATPase activity, coupled to transmembrane movement of substances		1.74e-09	2.244e-06	1.726e-07	1.336e-06	21	110	ABCA3,ATP8A1,ATP6V1D,PCYOX1,IPO8,ATP6V1H,ATP6V0E2,ATP1A1,ATP1A2,ATP2A2,ATP2B1,ATP2B2,ATP5F1A,ATP5F1B,ATP6V1C1,ATP6V1E1,ATP6V0B,ATP6V1G2,ATP6AP1,ABCA5,ATP6V0A2		Ptma		GO: Molecular Function	GO:0008092	cytoskeletal protein binding		0.007419	1	0.1173	0.7012	6	886	KLHL2,KIF5A,KIF5B,DBN1,ATP1A1,MAP4
Akt1		GO: Molecular Function	GO:0042625	ATPase coupled ion transmembrane transporter activity		3.209e-09	4.14e-06	2.957e-07	2.289e-06	17	74	ATP8A1,PCYOX1,ATP6V1H,ATP6V0E2,ATP1A1,ATP1A2,ATP2A2,ATP2B1,ATP2B2,ATP5F1A,ATP5F1B,ATP6V1C1,ATP6V1E1,ATP6V0B,ATP6V1G2,ATP6AP1,ATP6V0A2		Grin1		GO: Molecular Function	GO:0008017	microtubule binding		0.008673	1	0.1173	0.7012	3	214	KIF5A,KIF5B,MAP4
Chordc1		GO: Molecular Function	GO:0043492	ATPase activity, coupled to movement of substances		3.55e-09	4.579e-06	3.053e-07	2.363e-06	22	125	ABCA3,ATP8A1,ATP6V1D,PCYOX1,IPO8,ATP6V1H,ATP6V0E2,ATP1A1,ATP1A2,ATP2A2,ATP2B1,ATP2B2,ATP5F1A,ATP5F1B,ATP6V1C1,ATP6V1E1,ATP6V0B,ATP6V1G2,ATP6AP1,ATP9A,ABCA5,ATP6V0A2		Skil		GO: Molecular Function	GO:0042625	ATPase coupled ion transmembrane transporter activity		0.009445	1	0.1173	0.7012	2	74	ATP1A1,ATP2A2
Rac1		GO: Molecular Function	GO:0042623	ATPase activity, coupled		4.161e-09	5.368e-06	3.355e-07	2.597e-06	38	332	ABCA3,CHD3,ATP8A1,ATP6V1D,DDX54,HSPA8,PCYOX1,IPO8,ATP6V1H,CHD5,ATP6V0E2,ATP1A1,ATP1A2,ATP2A2,ATP2B1,YME1L1,ATP2B2,ATP5F1A,ATP5F1B,ATP6V1C1,ATP6V1E1,MYH10,ATP6V0B,ATP6V1G2,ATP6AP1,ATRX,MYO10,VPS4A,PSMC6,DHX9,AFG3L2,NSF,ATP9A,G3BP1,ABCA5,EIF4A2,CRBN,ATP6V0A2		Kpna4		GO: Molecular Function	GO:0046873	metal ion transmembrane transporter activity		0.009755	1	0.1173	0.7012	4	426	GRIN1,ATP1A1,ATP2A2,JPH3
Gria3		GO: Molecular Function	GO:0019904	protein domain specific binding		2.594e-08	3.346e-05	1.968e-06	1.524e-05	61	729	TCEAL3,MAPT,U2AF2,MEF2C,HNRNPK,CADM1,KIDINS220,UBE2I,QKI,DNAJA1,HSPA8,HPCAL4,VCP,HSP90AA1,EZR,EVL,SORBS2,SRSF5,SCAMP1,ATCAY,CALCOCO1,APP,YWHAE,YWHAZ,PPP1CC,CASK,ARHGAP5,PPP2CA,ARL1,RGS20,ELMO2,SSX2IP,DYNLL1,PRKCZ,ATP1A1,SNCA,RIMS2,ATP2B1,ATP2B2,ATRX,VPS4A,DAZAP2,NCAM1,GNG12,TUBA1A,DLG1,DLG4,MAP1LC3B,RAB6A,KRAS,CACNB1,CALM1,CALM2,NSF,GRB2,GRIA3,LAMP1,CIT,CCNG1,PLEKHA1,EPB41L2		Adgrb2		GO: Molecular Function	GO:0038085	vascular endothelial growth factor binding		0.009876	1	0.1173	0.7012	1	5	PDGFRA
Pnck		GO: Molecular Function	GO:0019843	rRNA binding		3.929e-08	5.068e-05	2.816e-06	2.179e-05	15	67	RPS3,RPS5,CIRBP,RPL23,NCL,NPM1,RPL3,RPL4,RPL5,RPL6,RPL9,RPL11,RPL12,RPL17,RPL19		Syf2		GO: Biological Process	GO:1903115	regulation of actin filament-based movement		8.308e-07	0.001122	0.001122	0.008732	4	37	DBN1,ATP1A1,ATP2A2,SUMO1
Bcap31		GO: Molecular Function	GO:0036442	proton-exporting ATPase activity		8.799e-08	0.0001135	5.974e-06	4.624e-05	10	29	ATP6V1H,ATP6V0E2,ATP5F1A,ATP5F1B,ATP6V1C1,ATP6V1E1,ATP6V0B,ATP6V1G2,ATP6AP1,ATP6V0A2		Pdgfra		GO: Biological Process	GO:0086004	regulation of cardiac muscle cell contraction		3.123e-05	0.04216	0.0146	0.1137	3	31	ATP1A1,ATP2A2,SUMO1
Acp2		GO: Molecular Function	GO:0046961	proton-transporting ATPase activity, rotational mechanism		1.106e-07	0.0001427	7.133e-06	5.521e-05	9	23	ATP6V1H,ATP6V0E2,ATP5F1A,ATP5F1B,ATP6V1C1,ATP6V1E1,ATP6V0B,ATP6AP1,ATP6V0A2		Atp2a2		GO: Biological Process	GO:0007409	axonogenesis		3.564e-05	0.04811	0.0146	0.1137	7	475	GRIN1,KIF5A,KIF5B,DBN1,SKIL,KALRN,RPL4
Rgs20		GO: Molecular Function	GO:0005516	calmodulin binding		1.33e-07	0.0001716	8.169e-06	6.323e-05	25	190	PDE1B,MAP2,ADCY1,ADD1,CASK,PNCK,ATP2B1,ATP2B2,MYH10,ARPP21,MYO5A,GAP43,MYO6,MYO10,SPTAN1,SPTBN1,PLCB1,SYT1,CAMSAP2,CACNA1A,NRGN,CAMK4,CAMK2A,CAMK2B,RGS4		Sec61a1		GO: Biological Process	GO:0070252	actin-mediated cell contraction		4.875e-05	0.06582	0.0146	0.1137	4	102	DBN1,ATP1A1,ATP2A2,SUMO1
Abhd3		GO: Molecular Function	GO:0003729	mRNA binding		1.655e-07	0.0002135	9.703e-06	7.51e-05	24	179	RPL30,RPS3,PAIP2,RPS5,RPS6,HNRNPK,CIRBP,NOCT,QKI,HSP90AA1,SRSF3,PABPC1,CELF1,LUC7L2,NCL,CALR,PUM2,EEF1A1,G3BP1,CELF3,UHMK1,RPL13A,RPL5,RPL6		Atrx		GO: Biological Process	GO:0061564	axon development		5.876e-05	0.07933	0.0146	0.1137	7	514	GRIN1,KIF5A,KIF5B,DBN1,SKIL,KALRN,RPL4
Hbp1		GO: Molecular Function	GO:0044769	ATPase activity, coupled to transmembrane movement of ions, rotational mechanism		2.575e-07	0.0003321	1.444e-05	0.0001118	9	25	ATP6V1H,ATP6V0E2,ATP5F1A,ATP5F1B,ATP6V1C1,ATP6V1E1,ATP6V0B,ATP6AP1,ATP6V0A2		Klhl2		GO: Biological Process	GO:0050804	modulation of chemical synaptic transmission		6.695e-05	0.09039	0.0146	0.1137	6	357	GRIN1,KIF5B,DBN1,KALRN,ATP2A2,JPH3
Hmgn2		GO: Molecular Function	GO:0022853	active ion transmembrane transporter activity		4.287e-07	0.0005531	2.305e-05	0.0001784	23	175	SLC12A5,ATP8A1,PCYOX1,SLC1A1,SLC1A2,ATP6V1H,ATP6V0E2,ATP1A1,ATP1A2,SLC4A4,ATP2A2,ATP2B1,ATP2B2,ATP5F1A,ATP5F1B,ATP6V1C1,ATP6V1E1,ATP6V0B,ATP6V1G2,ATP6AP1,SLC9A7,SLC4A10,ATP6V0A2		Rpl4		GO: Biological Process	GO:0031175	neuron projection development		7.874e-05	0.1063	0.0146	0.1137	9	953	GRIN1,KIF5A,KIF5B,DBN1,SKIL,KALRN,MAP4,MAP4K4,RPL4
Pafah1b2		GO: Molecular Function	GO:0015631	tubulin binding		6.458e-07	0.0008331	3.333e-05	0.0002579	31	293	PDE4B,MAP1A,MAP2,MAP4,MAPT,RPS3,GABARAP,SKA2,RABGAP1,VBP1,EZR,APC,MAPRE1,SIRT2,CCT5,SNCA,BRSK1,FYN,KIF1B,HSPH1,MAP1LC3A,KIF5B,KIF5C,MAP1LC3B,CAMSAP2,AGTPBP1,STMN2,TPPP,KIF3A,TTLL7,CHP1		Map4		GO: Biological Process	GO:0010769	regulation of cell morphogenesis involved in differentiation		8.654e-05	0.1168	0.0146	0.1137	6	374	GRIN1,DBN1,SKIL,TTC3,KALRN,RPL4
Sri		GO: Molecular Function	GO:0015078	proton transmembrane transporter activity		1.254e-06	0.001618	6.221e-05	0.0004815	17	109	UQCRH,ATP5PD,COX6A1,COX6B1,COX7C,ATP6V1H,ATP6V0E2,ATP5F1A,ATP5F1B,ATP5PF,ATP6V1C1,ATP6V1E1,ATP6V0B,ATP6V1G2,ATP6AP1,SLC9A7,ATP6V0A2		Atp1a1		GO: Biological Process	GO:0030048	actin filament-based movement		0.0001076	0.1453	0.01491	0.1161	4	125	DBN1,ATP1A1,ATP2A2,SUMO1
Cyth2		GO: Molecular Function	GO:0005198	structural molecule activity		1.348e-06	0.001738	6.438e-05	0.0004983	58	762	GPHN,RPL30,RPL27A,RPL35A,RPL36A,MAP1A,MAP2,MAP4,MAPT,RPS3,RPS5,RPS6,MBP,RPS15,RPS15A,ACTG1,RPS17,RPS19,RPS21,RPS23,RPS24,ADD1,RPL23,TUBA1B,WWC2,RPL7L1,CLTC,SLC25A23,MOBP,SORBS2,ANK2,ANK3,NEBL,SPTAN1,SPTBN1,ERBIN,CDC42SE2,TUBA1A,DLG1,DLG4,SPAG9,CAV2,SLC25A22,RPL13A,RPL3,RPL4,RPL5,RPL6,RPL7A,EPB41L2,RPL9,MAPK8IP2,RPL11,RPL12,RPL13,RPL17,RPL18,RPL19		Dbn1		GO: Biological Process	GO:0042391	regulation of membrane potential		0.0001105	0.1491	0.01491	0.1161	6	391	GRIN1,KIF5B,DBN1,ATP1A1,ATP2A2,SUMO1
Insig2		GO: Molecular Function	GO:0015662	ATPase activity, coupled to transmembrane movement of ions, phosphorylative mechanism		2.511e-06	0.003239	0.0001139	0.0008813	10	40	PCYOX1,ATP1A1,ATP1A2,ATP2A2,ATP2B1,ATP2B2,ATP6V1C1,ATP6V1E1,ATP6V0B,ATP6V1G2		Kazn		GO: Biological Process	GO:0010256	endomembrane system organization		0.0001225	0.1654	0.01503	0.117	7	578	VMP1,VTI1A,KIF5B,KALRN,SEC61A1,ATP2A2,SUMO1
Calr		GO: Molecular Function	GO:0044325	ion channel binding		2.56e-06	0.003302	0.0001139	0.0008813	18	127	PDE4B,AP2M1,FKBP1A,HSP90AA1,ANK2,ANK3,YWHAE,PPP2CA,NPTN,ARRB1,CTNNB1,RIMS2,FYN,SRI,KCNAB1,DLG1,CALM1,CALM2		Ttc3		GO: Biological Process	GO:0048667	cell morphogenesis involved in neuron differentiation		0.0001391	0.1878	0.01549	0.1206	7	590	GRIN1,KIF5A,KIF5B,DBN1,SKIL,KALRN,RPL4
Nfat5		GO: Molecular Function	GO:0051082	unfolded protein binding		2.708e-06	0.003493	0.0001164	0.0009012	16	103	HSP90B1,PFDN5,DNAJA1,HSPA8,HSP90AA1,SCG5,CCT2,CCT5,DNAJB11,TOMM20,AFG3L2,NPM1,CALR,DNAJB6,TRAP1,LRPAP1		C1galt1		GO: Biological Process	GO:0086003	cardiac muscle cell contraction		0.0001492	0.2014	0.01549	0.1206	3	52	ATP1A1,ATP2A2,SUMO1
Gstm5		GO: Molecular Function	GO:0044389	ubiquitin-like protein ligase binding		5.413e-06	0.006983	0.0002252	0.001743	28	277	ACTG1,GABARAP,TRIP4,TUBA1B,UBE2A,UBE2I,SPOP,DNAJA1,HSPA8,VCP,OTUB1,CCT2,YWHAE,YWHAZ,PRDX6,ARRB1,PRKACA,PRKAR1A,SUMO2,MAP1LC3A,MAP1LC3B,RBX1,ELOB,CALR,DNM1L,UBE2M,TMBIM6,AKTIP		Mlec		GO: Biological Process	GO:0022604	regulation of cell morphogenesis		0.0001692	0.2285	0.01632	0.1271	7	609	GRIN1,DBN1,SKIL,TTC3,KALRN,MAP4,RPL4
Cdip1		GO: Molecular Function	GO:0005543	phospholipid binding		1.093e-05	0.0141	0.0004406	0.00341	34	385	CFL1,HMGB1,PFN2,ZFYVE1,FAAH,AKT1,PITPNB,PREX1,HSPA8,RPH3A,WDFY3,SNCA,SNX2,SNX5,ARHGAP32,PSD,GAP43,MYO10,ARHGAP26,SPTBN1,MAP1LC3A,ITPR2,SNAP91,PLCB1,SYT1,GOT2,NPM1,NRGN,PCLO,HIP1R,THY1,PEBP1,NISCH,PLEKHA1		Ppp6r1		GO: Biological Process	GO:0000904	cell morphogenesis involved in differentiation		0.0001994	0.2692	0.01759	0.1369	8	840	GRIN1,KIF5A,KIF5B,DBN1,SKIL,TTC3,KALRN,RPL4
Psap		GO: Molecular Function	GO:0031625	ubiquitin protein ligase binding		1.183e-05	0.01527	0.0004626	0.003581	27	273	ACTG1,GABARAP,TUBA1B,UBE2A,UBE2I,SPOP,DNAJA1,HSPA8,VCP,OTUB1,CCT2,YWHAE,YWHAZ,PRDX6,ARRB1,PRKACA,PRKAR1A,SUMO2,MAP1LC3A,MAP1LC3B,RBX1,ELOB,CALR,DNM1L,UBE2M,TMBIM6,AKTIP		Kalrn		GO: Biological Process	GO:0048812	neuron projection morphogenesis		0.0002085	0.2814	0.01759	0.1369	7	630	GRIN1,KIF5A,KIF5B,DBN1,SKIL,KALRN,RPL4
Ppp1cc		GO: Molecular Function	GO:0030235	nitric-oxide synthase regulator activity		2.025e-05	0.02612	0.0007531	0.005829	5	10	AKT1,HSP90AA1,DYNLL1,CALM1,CALM2		Tacc1		GO: Biological Process	GO:0048168	regulation of neuronal synaptic plasticity		0.0002519	0.34	0.01773	0.1381	3	62	GRIN1,DBN1,JPH3
Dnajb11		GO: Molecular Function	GO:0022804	active transmembrane transporter activity		2.043e-05	0.02636	0.0007531	0.005829	32	363	ABCA3,TIMM23,SLC12A5,ATP8A1,ATP6V1D,TIMM17A,PCYOX1,IPO8,SLC36A4,SLC1A1,SLC1A2,ATP6V1H,ATP6V0E2,ATP1A1,ATP1A2,SLC4A4,ATP2A2,ATP2B1,ATP2B2,ATP5F1A,ATP5F1B,ATP6V1C1,ATP6V1E1,ATP6V0B,ATP6V1G2,ATP6AP1,TOMM20,SLC9A7,SLC25A22,ABCA5,SLC4A10,ATP6V0A2		Kif5a		GO: Biological Process	GO:0045664	regulation of neuron differentiation		0.0002645	0.357	0.01773	0.1381	7	655	GRIN1,DBN1,SKIL,TTC3,KALRN,MAP4K4,RPL4
Sgce		GO: Molecular Function	GO:0030507	spectrin binding		2.58e-05	0.03328	0.0009244	0.007155	8	32	ADD1,ANK2,ANK3,MYO10,SPTAN1,CAMSAP2,KIF3A,EPB41L2		Susd5		GO: Biological Process	GO:0031344	regulation of cell projection organization		0.0002694	0.3637	0.01773	0.1381	7	657	GRIN1,DBN1,SKIL,KALRN,MAP4,MAP4K4,RPL4
Dlst		GO: Molecular Function	GO:0008022	protein C-terminus binding		2.86e-05	0.03689	0.000997	0.007717	23	224	MID1IP1,UBE2I,CLTC,HPCAL4,SDCBP,CALCOCO1,PABPC1,PPP1CC,CASK,MAPRE1,PPP2CA,DYNLL1,CTNNB1,ATP2A2,ATP2B2,VPS4A,NCL,SYT1,DLG1,DLG4,DNM1,TCF4,NSF		Kif5b		GO: Biological Process	GO:0051960	regulation of nervous system development		0.0002759	0.3724	0.01773	0.1381	8	881	ADGRB2,GRIN1,DBN1,SKIL,TTC3,KALRN,MAP4K4,RPL4
Chd5		GO: Molecular Function	GO:0019208	phosphatase regulator activity		3.994e-05	0.05152	0.001356	0.01049	13	88	PPP1R1B,PPME1,PPP2R2B,PPP1R16B,ARPP19,ZEB2,B3GAT3,PTN,ANP32E,TESC,CALM1,CALM2,ENSA				GO: Biological Process	GO:0006937	regulation of muscle contraction		0.0002982	0.4026	0.01773	0.1381	4	163	DBN1,ATP1A1,ATP2A2,SUMO1
Slc1a2		GO: Molecular Function	GO:0003924	GTPase activity		6.473e-05	0.0835	0.002128	0.01647	23	236	RAB11B,TUBA1B,RAB14,RAB6B,ARF1,ARHGAP5,ARL1,EIF5B,RAB21,TUBA1A,DNM1,GNB2,RAB6A,RAC1,KRAS,RAP1A,RAP1B,DNM1L,EEF1A1,EEF1A2,SAR1B,EIF5,CDC42				GO: Biological Process	GO:0099537	trans-synaptic signaling		0.0003262	0.4403	0.01773	0.1381	7	678	GRIN1,KIF5A,KIF5B,DBN1,KALRN,ATP2A2,JPH3
Crbn		GO: Molecular Function	GO:0035254	glutamate receptor binding		6.598e-05	0.08512	0.002128	0.01647	9	46	FUS,CTNNB1,ATP2B2,DLG1,DLG4,CALM1,CALM2,CAMK2A,FLOT1				GO: Biological Process	GO:0098916	anterograde trans-synaptic signaling		0.0003262	0.4403	0.01773	0.1381	7	678	GRIN1,KIF5A,KIF5B,DBN1,KALRN,ATP2A2,JPH3
Mprip		GO: Molecular Function	GO:0000149	SNARE binding		7.874e-05	0.1016	0.002477	0.01917	16	134	STX7,RPH3A,NAPB,TMED9,VAMP4,SNPH,MYO5A,SPTAN1,CPLX1,VAMP1,SYT1,CACNA1A,NSF,VTI1A,CAV2,STX6				GO: Biological Process	GO:0007268	chemical synaptic transmission		0.0003262	0.4403	0.01773	0.1381	7	678	GRIN1,KIF5A,KIF5B,DBN1,KALRN,ATP2A2,JPH3
Prkaca		GO: Molecular Function	GO:0008047	enzyme activator activity		8.266e-05	0.1066	0.002539	0.01965	39	515	HMGB1,RABGAP1,CHN1,PREX1,PLXNB1,VCP,HACD3,APP,ARF1,ARHGAP5,ARHGDIA,ARL1,RAB3GAP1,ARRB1,RGS20,TOR1AIP1,ARHGAP42,ARHGAP32,GAPVD1,TBC1D9B,PSAP,ARHGAP26,RAP1GAP2,GDI2,B3GAT3,PLCB1,GMFB,RAB6A,CALM1,CALM2,KALRN,DNAJB6,RGS4,CYB5B,THY1,RABEP1,PAK2,ACAP2,MAPK8IP2				GO: Biological Process	GO:0048858	cell projection morphogenesis		0.0003284	0.4433	0.01773	0.1381	8	904	GRIN1,KIF5A,KIF5B,DBN1,SKIL,KALRN,MAP4,RPL4
Celf1		GO: Molecular Function	GO:0060589	nucleoside-triphosphatase regulator activity		0.0001091	0.1407	0.003272	0.02533	29	344	RABGAP1,PFN2,CHN1,PREX1,PLXNB1,HACD3,ARHGAP5,ARHGDIA,RAB3GAP1,ARRB1,RGS20,TOR1AIP1,ARHGAP42,ARHGAP32,GAPVD1,TBC1D9B,ARHGAP26,HSPH1,RAP1GAP2,GDI2,PLCB1,RAB6A,RALGDS,KALRN,DNAJB6,RGS4,THY1,RABEP1,ACAP2				GO: Biological Process	GO:0099536	synaptic signaling		0.0003533	0.4769	0.01784	0.1389	7	687	GRIN1,KIF5A,KIF5B,DBN1,KALRN,ATP2A2,JPH3
Ube2m		GO: Molecular Function	GO:0019905	syntaxin binding		0.0001245	0.1606	0.00365	0.02825	13	98	STX7,RPH3A,NAPB,TMED9,SNPH,MYO5A,SPTAN1,CPLX1,SYT1,CACNA1A,NSF,CAV2,STX6				GO: Biological Process	GO:0055117	regulation of cardiac muscle contraction		0.0003606	0.4868	0.01784	0.1389	3	70	ATP1A1,ATP2A2,SUMO1
Mef2c		GO: Molecular Function	GO:0035091	phosphatidylinositol binding		0.0001465	0.189	0.0042	0.03251	21	217	CFL1,PFN2,ZFYVE1,AKT1,RPH3A,WDFY3,SNX2,SNX5,ARHGAP32,GAP43,MYO10,ITPR2,SNAP91,PLCB1,SYT1,NPM1,NRGN,HIP1R,THY1,NISCH,PLEKHA1				GO: Biological Process	GO:0010975	regulation of neuron projection development		0.0003823	0.516	0.01784	0.1389	6	492	GRIN1,DBN1,SKIL,KALRN,MAP4K4,RPL4
Eif4g2		GO: Molecular Function	GO:0008289	lipid binding		0.0001553	0.2004	0.004356	0.03372	48	701	CFL1,CYTH2,HMGB1,PFN2,ZFYVE1,FAAH,AP2M1,AKT1,PITPNB,PREX1,HSPA8,VCP,NPC2,RPH3A,ARHGDIA,DROSHA,CLINT1,WDFY3,ATP1A1,ATP1A2,SNCA,SNX2,SNX5,ARHGAP32,PSAP,PSD,GAP43,MYO10,ARHGAP26,SPTBN1,MAP1LC3A,DBI,ITPR2,SNAP91,PLCB1,SYT1,GOT2,NPM1,NRGN,PCLO,HIP1R,DNM1L,GSTM5,THY1,PEBP1,NISCH,PLEKHA1,UNC13C				GO: Biological Process	GO:0032990	cell part morphogenesis		0.0003833	0.5174	0.01784	0.1389	8	925	GRIN1,KIF5A,KIF5B,DBN1,SKIL,KALRN,MAP4,RPL4
Apc		GO: Molecular Function	GO:0043274	phospholipase binding		0.0001612	0.2079	0.004424	0.03425	6	22	SRSF3,PRKCZ,SNCA,CALM1,CALM2,CAMK2B				GO: Biological Process	GO:0060134	prepulse inhibition		0.0003968	0.5356	0.01785	0.139	2	15	GRIN1,DBN1
Trap1		GO: Molecular Function	GO:0008565	protein transporter activity		0.0001697	0.2189	0.00456	0.03529	13	101	TIMM23,TSNAX,TIMM17A,VLDLR,IPO8,IPO9,VPS35,TOMM20,TOMM70,MLC1,RAP1A,LRP1,NUTF2				GO: Biological Process	GO:0010770	positive regulation of cell morphogenesis involved in differentiation		0.0004625	0.6244	0.01952	0.1519	4	183	DBN1,SKIL,KALRN,RPL4
Clint1		GO: Molecular Function	GO:0070325	lipoprotein particle receptor binding		0.0002109	0.272	0.005519	0.04272	6	23	HSP90B1,AP2M1,DNAJA1,SYT1,LRP1,LRPAP1				GO: Biological Process	GO:0051640	organelle localization		0.0004626	0.6245	0.01952	0.1519	6	510	TACC1,PPP6R1,KIF5B,MAP4,ATP2A2,ITSN1
Crip2		GO: Molecular Function	GO:0008135	translation factor activity, RNA binding		0.0002139	0.276	0.005519	0.04272	12	90	ABCF1,DENR,EIF5B,EIF3H,EEF1A1,EEF1A2,EEF1G,EIF1AX,EIF4A2,EIF4G2,EIF5,EIF5A				GO: Biological Process	GO:0072657	protein localization to membrane		0.0004871	0.6576	0.01977	0.1539	6	515	KIF5B,DBN1,KALRN,SEC61A1,RPL4,SUMO1
Nsmf		GO: Molecular Function	GO:0019788	NEDD8 transferase activity		0.0002383	0.3074	0.005702	0.04413	3	4	RNF7,RBX1,UBE2M				GO: Biological Process	GO:0050770	regulation of axonogenesis		0.000512	0.6912	0.01977	0.1539	4	188	GRIN1,DBN1,SKIL,RPL4
Cdc42		GO: Molecular Function	GO:0097100	supercoiled DNA binding		0.0002383	0.3074	0.005702	0.04413	3	4	RPS3,HMGB1,PSIP1				GO: Biological Process	GO:0061003	positive regulation of dendritic spine morphogenesis		0.0005126	0.6921	0.01977	0.1539	2	17	DBN1,KALRN
Pknox1		GO: Molecular Function	GO:0032051	clathrin light chain binding		0.0002383	0.3074	0.005702	0.04413	3	4	CLTC,NSG2,NSG1				GO: Biological Process	GO:0050772	positive regulation of axonogenesis		0.0005338	0.7207	0.01991	0.155	3	80	DBN1,SKIL,RPL4
Kif5b		GO: Molecular Function	GO:0005525	GTP binding		0.0002414	0.3114	0.005702	0.04413	30	378	RAB11B,TUBA1B,AK4,HSP90AA1,SCG5,RAB14,RAB6B,SAR1A,ARF1,ARHGAP5,ARL1,EIF5B,RAB21,ARL5A,SEPT8,TUBA1A,DNM1,RAB6A,RAC1,RAB12,KRAS,RAP1A,RAP1B,DNM1L,EEF1A1,EEF1A2,SAR1B,EIF5,DYNC1LI1,CDC42				GO: Biological Process	GO:0032970	regulation of actin filament-based process		0.0005456	0.7365	0.01991	0.155	5	342	DBN1,ATP1A1,PDGFRA,ATP2A2,SUMO1
Ctnnb1		GO: Molecular Function	GO:0015075	ion transmembrane transporter activity		0.0002459	0.3172	0.005702	0.04413	56	873	TTYH1,SLC22A17,SLC12A5,ATP8A1,SERINC1,UQCRH,ATP5PD,PCYOX1,VDAC3,SLC36A4,COX6A1,COX6B1,COX7C,SLC1A1,SLC1A2,SLC40A1,ATP6V1H,ATP6V0E2,ATP1A1,ATP1A2,SLC4A4,ATP2A2,ATP2B1,ATP2B2,ATP5F1A,GABRA1,ATP5F1B,GABRB3,GABRG2,ATP5PF,ATP6V1C1,ATP6V1E1,ATP6V0B,ATP6V1G2,ATP6AP1,ITPR2,MLC1,GLRB,SLC9A7,KCNAB1,SERINC3,DLG1,DLG4,NIPA1,CACNA1A,CACNB1,CALM1,CALM2,GRIA3,SLC39A10,NCS1,SLC25A22,MTMR6,SLC4A10,ATP6V0A2,JPH3				GO: Biological Process	GO:0055119	relaxation of cardiac muscle		0.000576	0.7776	0.02046	0.1593	2	18	ATP1A1,ATP2A2
Atp1a2		GO: Molecular Function	GO:0030276	clathrin binding		0.0002475	0.3193	0.005702	0.04413	10	66	AP2M1,CLTC,RPH3A,ARRB1,NSG2,NSG1,CLINT1,SNAP91,SYT1,HIP1R				GO: Biological Process	GO:0006942	regulation of striated muscle contraction		0.0006374	0.8605	0.02206	0.1718	3	85	ATP1A1,ATP2A2,SUMO1
Arpp19		GO: Molecular Function	GO:0008017	microtubule binding		0.0003314	0.4275	0.007499	0.05804	20	214	MAP1A,MAP2,MAP4,MAPT,RPS3,GABARAP,SKA2,EZR,APC,MAPRE1,SNCA,KIF1B,MAP1LC3A,KIF5B,KIF5C,MAP1LC3B,CAMSAP2,TPPP,KIF3A,CHP1				GO: Biological Process	GO:0055082	cellular chemical homeostasis		0.0006885	0.9295	0.02322	0.1808	7	768	GRIN1,KIF5B,ATP1A1,PDGFRA,MAP4K4,ATP2A2,JPH3
Mid1ip1		GO: Molecular Function	GO:0005521	lamin binding		0.0003946	0.5091	0.008685	0.06722	5	17	HNRNPK,PPP1CC,TOR1AIP1,PLCB1,SYNE1				GO: Biological Process	GO:0048013	ephrin receptor signaling pathway		0.0007053	0.9521	0.02322	0.1808	3	88	GRIN1,KALRN,ITSN1
Emc10		GO: Molecular Function	GO:0016247	channel regulator activity		0.0003993	0.5151	0.008685	0.06722	15	139	STX7,FKBP1A,HPCAL4,DPP10,YWHAE,TSPAN13,PRKCZ,ARPP19,SRI,KCNAB1,DLG1,GNB2,GPLD1,ENSA,CHP1				GO: Biological Process	GO:0048814	regulation of dendrite morphogenesis		0.0007289	0.984	0.02343	0.1824	3	89	GRIN1,DBN1,KALRN
Clstn3		GO: Molecular Function	GO:0048306	calcium-dependent protein binding		0.0004039	0.5211	0.008685	0.06722	10	70	VLDLR,NSMF,MYO5A,SYN1,SYN2,SYT1,CALM1,CALM2,STMN2,CHP1				GO: Biological Process	GO:0050767	regulation of neurogenesis		0.0007778	1	0.02442	0.1901	7	784	GRIN1,DBN1,SKIL,TTC3,KALRN,MAP4K4,RPL4
Nutf2		GO: Molecular Function	GO:0070180	large ribosomal subunit rRNA binding		0.0004188	0.5403	0.008857	0.06855	4	10	RPL23,RPL12,RPL17,RPL19				GO: Biological Process	GO:0090257	regulation of muscle system process		0.0009064	1	0.02781	0.2165	4	219	DBN1,ATP1A1,ATP2A2,SUMO1
Rps15a		GO: Molecular Function	GO:0003779	actin binding		0.0004811	0.6206	0.01001	0.07747	31	412	KLHL2,MAP1A,CFL1,PFN2,FMNL2,ADD1,MKL2,CAP2,EZR,EVL,NEBL,GAS7,SORBS1,PARVA,LIMCH1,MYH10,MYO5A,MYO6,MYO10,SPTAN1,SPTBN1,JMY,MPRIP,SYN1,GMFB,CAMK2B,SYNE1,CAPZA2,HIP1R,TMSB4X,EPB41L2				GO: Biological Process	GO:2001257	regulation of cation channel activity		0.001022	1	0.03067	0.2388	3	100	KIF5B,SUMO1,JPH3
Vdac3		GO: Molecular Function	GO:0005085	guanyl-nucleotide exchange factor activity		0.0005071	0.6541	0.01038	0.08036	25	306	CYTH2,FGFR1,PREX1,RAB3GAP1,FYN,GAPVD1,PSD,SPTAN1,SPTBN1,NCAM1,ARHGEF9,DLG4,RALGDS,RAP1A,CALM1,CALM2,KALRN,CAMK2A,CAMK2B,RAPGEF4,PSD3,GRB2,RASGEF1A,SPATA13,RAPGEFL1				GO: Biological Process	GO:2000463	positive regulation of excitatory postsynaptic potential		0.001211	1	0.03479	0.2709	2	26	GRIN1,DBN1
Dynll1		GO: Molecular Function	GO:0050750	low-density lipoprotein particle receptor binding		0.0005288	0.6821	0.01052	0.0814	5	18	HSP90B1,AP2M1,DNAJA1,SYT1,LRPAP1				GO: Biological Process	GO:0045822	negative regulation of heart contraction		0.001211	1	0.03479	0.2709	2	26	ATP1A1,ATP2A2
Syn2		GO: Molecular Function	GO:0015459	potassium channel regulator activity		0.0005299	0.6836	0.01052	0.0814	8	48	DPP10,YWHAE,PRKCZ,ARPP19,KCNAB1,DLG1,ENSA,CHP1				GO: Biological Process	GO:0010644	cell communication by electrical coupling		0.001307	1	0.03675	0.2861	2	27	DBN1,ATP1A1
Mkl2		GO: Molecular Function	GO:0051022	Rho GDP-dissociation inhibitor binding		0.000578	0.7456	0.0113	0.08744	3	5	HSP90AA1,RAC1,CDC42				GO: Biological Process	GO:0051650	establishment of vesicle localization		0.001522	1	0.04194	0.3265	4	252	PPP6R1,KIF5B,ATP2A2,ITSN1
Sardh		GO: Molecular Function	GO:0032561	guanyl ribonucleotide binding		0.0005966	0.7696	0.01149	0.0889	30	399	RAB11B,TUBA1B,AK4,HSP90AA1,SCG5,RAB14,RAB6B,SAR1A,ARF1,ARHGAP5,ARL1,EIF5B,RAB21,ARL5A,SEPT8,TUBA1A,DNM1,RAB6A,RAC1,RAB12,KRAS,RAP1A,RAP1B,DNM1L,EEF1A1,EEF1A2,SAR1B,EIF5,DYNC1LI1,CDC42				GO: Biological Process	GO:0019725	cellular homeostasis		0.001576	1	0.04244	0.3304	7	885	GRIN1,KIF5B,ATP1A1,PDGFRA,MAP4K4,ATP2A2,JPH3
Gabra1		GO: Molecular Function	GO:0019001	guanyl nucleotide binding		0.0006214	0.8016	0.01179	0.09124	30	400	RAB11B,TUBA1B,AK4,HSP90AA1,SCG5,RAB14,RAB6B,SAR1A,ARF1,ARHGAP5,ARL1,EIF5B,RAB21,ARL5A,SEPT8,TUBA1A,DNM1,RAB6A,RAC1,RAB12,KRAS,RAP1A,RAP1B,DNM1L,EEF1A1,EEF1A2,SAR1B,EIF5,DYNC1LI1,CDC42				GO: Biological Process	GO:0090075	relaxation of muscle		0.001613	1	0.04244	0.3304	2	30	ATP1A1,ATP2A2
Rps5		GO: Molecular Function	GO:0031748	D1 dopamine receptor binding		0.0006376	0.8225	0.01192	0.09226	4	11	PPP1R1B,DLG4,NSF,CAV2				GO: Biological Process	GO:0051656	establishment of organelle localization		0.001649	1	0.04244	0.3304	5	438	PPP6R1,KIF5B,MAP4,ATP2A2,ITSN1
Etv5		GO: Molecular Function	GO:0031489	myosin V binding		0.0006944	0.8958	0.0128	0.09905	5	19	RAB11B,RAB14,RAB6B,FUS,RAB6A				GO: Biological Process	GO:0050905	neuromuscular process		0.001728	1	0.04244	0.3304	3	120	GRIN1,DBN1,JPH3
Bcas1		GO: Molecular Function	GO:0019888	protein phosphatase regulator activity		0.0007862	1	0.01428	0.1106	10	76	PPP1R1B,PPME1,PPP2R2B,PPP1R16B,ARPP19,B3GAT3,PTN,CALM1,CALM2,ENSA				GO: Biological Process	GO:0060048	cardiac muscle contraction		0.001812	1	0.04244	0.3304	3	122	ATP1A1,ATP2A2,SUMO1
Timm23		GO: Molecular Function	GO:0017075	syntaxin-1 binding		0.0008961	1	0.01573	0.1217	5	20	SNPH,MYO5A,CPLX1,SYT1,NSF				GO: Biological Process	GO:0001964	startle response		0.001835	1	0.04244	0.3304	2	32	GRIN1,DBN1
Chp1		GO: Molecular Function	GO:0005096	GTPase activator activity		0.0008972	1	0.01573	0.1217	23	283	RABGAP1,CHN1,PREX1,PLXNB1,HACD3,ARHGAP5,ARHGDIA,RAB3GAP1,ARRB1,RGS20,ARHGAP42,ARHGAP32,GAPVD1,TBC1D9B,ARHGAP26,RAP1GAP2,GDI2,PLCB1,KALRN,RGS4,THY1,RABEP1,ACAP2				GO: Biological Process	GO:0098662	inorganic cation transmembrane transport		0.00186	1	0.04244	0.3304	6	667	GRIN1,KIF5B,ATP1A1,ATP2A2,SUMO1,JPH3
Tvp23b		GO: Molecular Function	GO:0022890	inorganic cation transmembrane transporter activity		0.0009094	1	0.01573	0.1217	37	542	TTYH1,SLC12A5,UQCRH,ATP5PD,COX6A1,COX6B1,COX7C,SLC1A1,SLC1A2,SLC40A1,ATP6V1H,ATP6V0E2,ATP1A1,ATP1A2,SLC4A4,ATP2A2,ATP2B1,ATP2B2,ATP5F1A,ATP5F1B,ATP5PF,ATP6V1C1,ATP6V1E1,ATP6V0B,ATP6V1G2,ATP6AP1,ITPR2,SLC9A7,KCNAB1,NIPA1,CACNA1A,CACNB1,SLC39A10,NCS1,MTMR6,ATP6V0A2,JPH3				GO: Biological Process	GO:0051648	vesicle localization		0.001881	1	0.04244	0.3304	4	267	PPP6R1,KIF5B,ATP2A2,ITSN1
Ube2i		GO: Molecular Function	GO:0008553	proton-exporting ATPase activity, phosphorylative mechanism		0.0009266	1	0.01573	0.1217	4	12	ATP6V1C1,ATP6V1E1,ATP6V0B,ATP6V1G2				GO: Biological Process	GO:0007613	memory		0.001942	1	0.04244	0.3304	3	125	GRIN1,KALRN,JPH3
Sirt2		GO: Molecular Function	GO:0097602	cullin family protein binding		0.0009266	1	0.01573	0.1217	4	12	RNF7,DCUN1D4,RBX1,KCTD17				GO: Biological Process	GO:0002026	regulation of the force of heart contraction		0.001951	1	0.04244	0.3304	2	33	ATP1A1,ATP2A2
Map2		GO: Molecular Function	GO:0031072	heat shock protein binding		0.0009689	1	0.01623	0.1256	12	106	MAPT,RPS3,HNRNPK,CLTC,DNAJA1,FKBP1A,HSPA8,CHORDC1,ARHGDIA,DLST,DNAJB6,ENO1				GO: Biological Process	GO:0061001	regulation of dendritic spine morphogenesis		0.001951	1	0.04244	0.3304	2	33	DBN1,KALRN
Hivep2		GO: Molecular Function	GO:0043531	ADP binding		0.001014	1	0.01655	0.1281	7	41	HSPA8,VCP,CHORDC1,ATP1A1,ATP5F1A,MYH10,MYO6				GO: Biological Process	GO:0033365	protein localization to organelle		0.001956	1	0.04244	0.3304	7	919	KPNA4,VTI1A,HUWE1,ATRX,SEC61A1,RPL4,SUMO1
Hspa8		GO: Molecular Function	GO:0019212	phosphatase inhibitor activity		0.001014	1	0.01655	0.1281	7	41	PPP1R1B,PPME1,ARPP19,PTN,ANP32E,TESC,ENSA				GO: Biological Process	GO:0070588	calcium ion transmembrane transport		0.001985	1	0.04244	0.3304	4	271	GRIN1,ATP2A2,SUMO1,JPH3
Capza2		GO: Molecular Function	GO:0051021	GDP-dissociation inhibitor binding		0.001122	1	0.01809	0.14	3	6	HSP90AA1,RAC1,CDC42				GO: Biological Process	GO:0050807	regulation of synapse organization		0.001986	1	0.04244	0.3304	3	126	ADGRB2,GRIN1,DBN1
Anp32e		GO: Molecular Function	GO:0042288	MHC class I protein binding		0.001138	1	0.01813	0.1403	5	21	VCP,ATP5F1A,ATP5F1B,PDIA3,BCAP31				GO: Biological Process	GO:0050803	regulation of synapse structure or activity		0.002012	1	0.04244	0.3304	4	272	ADGRB2,GRIN1,DBN1,JPH3
Ube2a		GO: Molecular Function	GO:0051020	GTPase binding		0.00131	1	0.02061	0.1595	25	327	RABGAP1,FMNL2,HSP90AA1,IPO8,RPH3A,ARHGDIA,RAB3GAP1,IPO9,PRKACA,RIMS2,TBC1D9B,ATP6AP1,MYO5A,VPS4A,SPTBN1,GDI2,GNB2,RAC1,RAP1A,NSF,RAPGEF4,CIT,NUTF2,ACAP2,ENO1				GO: Biological Process	GO:0098815	modulation of excitatory postsynaptic potential		0.002319	1	0.04816	0.375	2	36	GRIN1,DBN1
Eef1a2		GO: Molecular Function	GO:0090079	translation regulator activity, nucleic acid binding		0.001426	1	0.02163	0.1675	5	22	ABCF1,PAIP2,PABPC1,CELF1,PAIP2B				GO: Biological Process	GO:0010976	positive regulation of neuron projection development		0.002414	1	0.04938	0.3844	4	286	DBN1,SKIL,KALRN,RPL4
H3f3b		GO: Molecular Function	GO:0050998	nitric-oxide synthase binding		0.001426	1	0.02163	0.1675	5	22	CTNNB1,NOS1AP,DNM1,CALM1,CALM2				GO: Biological Process	GO:0001508	action potential		0.002573	1	0.05184	0.4036	3	138	ATP1A1,ATP2A2,SUMO1
Sdc4		GO: Molecular Function	GO:0050780	dopamine receptor binding		0.001426	1	0.02163	0.1675	5	22	PPP1R1B,DLG4,DNM1,NSF,CAV2				GO: Biological Process	GO:0048813	dendrite morphogenesis		0.00279	1	0.05538	0.4312	3	142	GRIN1,DBN1,KALRN
Aldoc		GO: Molecular Function	GO:0030695	GTPase regulator activity		0.001493	1	0.0224	0.1734	24	312	RABGAP1,CHN1,PREX1,PLXNB1,HACD3,ARHGAP5,ARHGDIA,RAB3GAP1,ARRB1,RGS20,ARHGAP42,ARHGAP32,GAPVD1,TBC1D9B,ARHGAP26,RAP1GAP2,GDI2,PLCB1,RALGDS,KALRN,RGS4,THY1,RABEP1,ACAP2				GO: Biological Process	GO:0060284	regulation of cell development		0.002894	1	0.05663	0.4409	7	985	GRIN1,DBN1,SKIL,TTC3,KALRN,MAP4K4,RPL4
Rpl19		GO: Molecular Function	GO:0031996	thioesterase binding		0.001759	1	0.02585	0.2001	4	14	RAC1,CALM1,CALM2,CDC42				GO: Biological Process	GO:0045823	positive regulation of heart contraction		0.003	1	0.05785	0.4504	2	41	ATP1A1,ATP2A2
Psmd11		GO: Molecular Function	GO:0008324	cation transmembrane transporter activity		0.001763	1	0.02585	0.2001	41	642	TTYH1,SLC12A5,ATP8A1,SERINC1,UQCRH,ATP5PD,SLC36A4,COX6A1,COX6B1,COX7C,SLC1A1,SLC1A2,SLC40A1,ATP6V1H,ATP6V0E2,ATP1A1,ATP1A2,SLC4A4,ATP2A2,ATP2B1,ATP2B2,ATP5F1A,ATP5F1B,ATP5PF,ATP6V1C1,ATP6V1E1,ATP6V0B,ATP6V1G2,ATP6AP1,ITPR2,SLC9A7,KCNAB1,SERINC3,NIPA1,CACNA1A,CACNB1,SLC39A10,NCS1,MTMR6,ATP6V0A2,JPH3				GO: Biological Process	GO:0098655	cation transmembrane transport		0.003087	1	0.05869	0.4569	6	738	GRIN1,KIF5B,ATP1A1,ATP2A2,SUMO1,JPH3
Elmo2		GO: Molecular Function	GO:0030165	PDZ domain binding		0.001828	1	0.02649	0.205	12	114	CADM1,KIDINS220,CASK,ATP2B1,ATP2B2,GNG12,DLG1,DLG4,NSF,GRIA3,CIT,PLEKHA1				GO: Biological Process	GO:0050775	positive regulation of dendrite morphogenesis		0.003146	1	0.05898	0.4592	2	42	DBN1,KALRN
Serinc3		GO: Molecular Function	GO:0008097	5S rRNA binding		0.001906	1	0.02732	0.2114	3	7	RPL3,RPL4,RPL5				GO: Biological Process	GO:0050773	regulation of dendrite development		0.003256	1	0.05932	0.4619	3	150	GRIN1,DBN1,KALRN
Pgs1		GO: Molecular Function	GO:0008137	NADH dehydrogenase (ubiquinone) activity		0.002035	1	0.02823	0.2185	7	46	NDUFA8,NDUFA9,NDUFB8,NDUFB9,NDUFS4,NDUFV2,NDUFA13				GO: Biological Process	GO:0060999	positive regulation of dendritic spine development		0.003295	1	0.05932	0.4619	2	43	DBN1,KALRN
Slc12a5		GO: Molecular Function	GO:0003954	NADH dehydrogenase activity		0.002035	1	0.02823	0.2185	7	46	NDUFA8,NDUFA9,NDUFB8,NDUFB9,NDUFS4,NDUFV2,NDUFA13				GO: Biological Process	GO:0006875	cellular metal ion homeostasis		0.003413	1	0.05932	0.4619	5	518	GRIN1,ATP1A1,PDGFRA,ATP2A2,JPH3
Cox7c		GO: Molecular Function	GO:0050136	NADH dehydrogenase (quinone) activity		0.002035	1	0.02823	0.2185	7	46	NDUFA8,NDUFA9,NDUFB8,NDUFB9,NDUFS4,NDUFV2,NDUFA13				GO: Biological Process	GO:0098660	inorganic ion transmembrane transport		0.003432	1	0.05932	0.4619	6	754	GRIN1,KIF5B,ATP1A1,ATP2A2,SUMO1,JPH3
Vmp1		GO: Molecular Function	GO:0019003	GDP binding		0.002128	1	0.02921	0.2261	8	59	RAB11B,RAB14,ARF1,RAB21,RAB12,KRAS,RAP1B,DYNC1LI1				GO: Biological Process	GO:0050806	positive regulation of synaptic transmission		0.003443	1	0.05932	0.4619	3	153	GRIN1,KIF5B,DBN1
Kif3a		GO: Molecular Function	GO:0003774	motor activity		0.002197	1	0.02983	0.2309	13	132	DYNLL2,DYNLL1,MYH10,MYO5A,MYO6,MYO10,KIF1B,KIF5B,KIF5C,DYNC1H1,DYNC1I2,KIF3A,DYNC1LI1				GO: Biological Process	GO:0007270	neuron-neuron synaptic transmission		0.003506	1	0.05932	0.4619	3	154	GRIN1,KIF5B,KALRN
Sept8		GO: Molecular Function	GO:0005088	Ras guanyl-nucleotide exchange factor activity		0.00222	1	0.02984	0.2309	19	232	FGFR1,PREX1,RAB3GAP1,FYN,SPTAN1,SPTBN1,NCAM1,ARHGEF9,DLG4,RAP1A,CALM1,CALM2,KALRN,CAMK2A,CAMK2B,RAPGEF4,GRB2,RASGEF1A,SPATA13				GO: Biological Process	GO:0007029	endoplasmic reticulum organization		0.003603	1	0.05932	0.4619	2	45	VMP1,SEC61A1
Mapt		GO: Molecular Function	GO:0051721	protein phosphatase 2A binding		0.002266	1	0.03	0.2322	6	35	MAPT,PPME1,AKT1,PPP2CA,ARPP19,ENSA				GO: Biological Process	GO:0045773	positive regulation of axon extension		0.003603	1	0.05932	0.4619	2	45	DBN1,RPL4
Chd3		GO: Molecular Function	GO:0047485	protein N-terminus binding		0.002279	1	0.03	0.2322	12	117	RPS21,SDCBP,PPP1CC,NCOR2,SNCA,GAD1,SPTAN1,MORF4L1,NPM1,CALM1,CALM2,EIF5A				GO: Biological Process	GO:0060997	dendritic spine morphogenesis		0.003603	1	0.05932	0.4619	2	45	DBN1,KALRN
Gabarap		GO: Molecular Function	GO:0050811	GABA receptor binding		0.002325	1	0.03029	0.2344	4	15	GABARAP,TRAK1,PPP2CA,TRAK2				GO: Biological Process	GO:1903523	negative regulation of blood circulation		0.003603	1	0.05932	0.4619	2	45	ATP1A1,ATP2A2
G3bp1		GO: Molecular Function	GO:0072542	protein phosphatase activator activity		0.00296	1	0.03819	0.2956	3	8	B3GAT3,CALM1,CALM2				GO: Biological Process	GO:0051962	positive regulation of nervous system development		0.003794	1	0.0617	0.4804	5	531	ADGRB2,DBN1,SKIL,KALRN,RPL4
Dync1h1		GO: Molecular Function	GO:0008093	cytoskeletal adaptor activity		0.003003	1	0.03836	0.2969	4	16	SDCBP,SORBS2,ANK2,ANK3				GO: Biological Process	GO:0098900	regulation of action potential		0.003925	1	0.06308	0.4911	2	47	ATP2A2,SUMO1
Zbtb4		GO: Molecular Function	GO:0019902	phosphatase binding		0.003112	1	0.03914	0.3029	16	187	HSP90B1,MAPT,PPME1,AKT1,VCP,HSP90AA1,PPP1CC,PPP2CA,CTNNB1,ARPP19,NCAM1,DLG1,DLG4,GRB2,SPRED1,ENSA				GO: Biological Process	GO:0006941	striated muscle contraction		0.003972	1	0.06309	0.4912	3	161	ATP1A1,ATP2A2,SUMO1
Abca5		GO: Molecular Function	GO:0035255	ionotropic glutamate receptor binding		0.003125	1	0.03914	0.3029	5	26	FUS,CTNNB1,DLG1,DLG4,FLOT1				GO: Biological Process	GO:0048167	regulation of synaptic plasticity		0.004549	1	0.07118	0.5542	3	169	GRIN1,DBN1,JPH3
Sult4a1		GO: Molecular Function	GO:0003743	translation initiation factor activity		0.003715	1	0.04607	0.3566	7	51	DENR,EIF5B,EIF3H,EIF1AX,EIF4A2,EIF4G2,EIF5				GO: Biological Process	GO:0006974	cellular response to DNA damage stimulus		0.004587	1	0.07118	0.5542	6	800	TLK2,HUWE1,SYF2,SKIL,ATRX,SUMO1
Arrb1		GO: Molecular Function	GO:0019903	protein phosphatase binding		0.00415	1	0.05099	0.3947	13	142	HSP90B1,MAPT,PPME1,AKT1,VCP,HSP90AA1,PPP1CC,PPP2CA,CTNNB1,ARPP19,DLG4,GRB2,ENSA				GO: Biological Process	GO:0086001	cardiac muscle cell action potential		0.004784	1	0.0734	0.5714	2	52	ATP1A1,ATP2A2
Slc25a22		GO: Molecular Function	GO:0015450	P-P-bond-hydrolysis-driven protein transmembrane transporter activity		0.004311	1	0.05246	0.406	3	9	TIMM23,TIMM17A,TOMM20				GO: Biological Process	GO:0006936	muscle contraction		0.004867	1	0.07348	0.572	4	348	DBN1,ATP1A1,ATP2A2,SUMO1
Atp6ap1		GO: Molecular Function	GO:1990932	5.8S rRNA binding		0.004553	1	0.05292	0.4096	2	3	RPL6,RPL19				GO: Biological Process	GO:0035176	social behavior		0.004966	1	0.07348	0.572	2	53	GRIN1,KALRN
Atp6v1e1		GO: Molecular Function	GO:0004069	L-aspartate:2-oxoglutarate aminotransferase activity		0.004553	1	0.05292	0.4096	2	3	GOT1,GOT2				GO: Biological Process	GO:0051703	intraspecies interaction between organisms		0.004966	1	0.07348	0.572	2	53	GRIN1,KALRN
Vip		GO: Molecular Function	GO:0080130	L-phenylalanine:2-oxoglutarate aminotransferase activity		0.004553	1	0.05292	0.4096	2	3	GOT1,GOT2				GO: Biological Process	GO:0097061	dendritic spine organization		0.00515	1	0.07348	0.572	2	54	DBN1,KALRN
Hint3		GO: Molecular Function	GO:0031800	type 3 metabotropic glutamate receptor binding		0.004553	1	0.05292	0.4096	2	3	CALM1,CALM2				GO: Biological Process	GO:0031346	positive regulation of cell projection organization		0.005866	1	0.07348	0.572	4	367	DBN1,SKIL,KALRN,RPL4
Sec63		GO: Molecular Function	GO:0031997	N-terminal myristoylation domain binding		0.004553	1	0.05292	0.4096	2	3	CALM1,CALM2				GO: Biological Process	GO:0038091	positive regulation of cell proliferation by VEGF-activated platelet derived growth factor receptor signaling pathway		0.005949	1	0.07348	0.572	1	3	PDGFRA
Fyn		GO: Molecular Function	GO:0032794	GTPase activating protein binding		0.004743	1	0.05447	0.4216	4	18	AKT1,PLXNB1,GAPVD1,CAMK2A				GO: Biological Process	GO:0072277	metanephric glomerular capillary formation		0.005949	1	0.07348	0.572	1	3	PDGFRA
Serinc1		GO: Molecular Function	GO:1901981	phosphatidylinositol phosphate binding		0.004772	1	0.05447	0.4216	12	128	CFL1,PFN2,ZFYVE1,AKT1,RPH3A,GAP43,MYO10,PLCB1,SYT1,NPM1,NRGN,PLEKHA1				GO: Biological Process	GO:0038086	VEGF-activated platelet-derived growth factor receptor signaling pathway		0.005949	1	0.07348	0.572	1	3	PDGFRA
Atp2b1		GO: Molecular Function	GO:0042826	histone deacetylase binding		0.005442	1	0.06158	0.4766	11	114	MEF2C,MEF2D,HSP90AA1,SFPQ,YWHAE,NCOR2,SIRT2,CHD5,CAMTA2,RAC1,SUDS3				GO: Biological Process	GO:0033292	T-tubule organization		0.005949	1	0.07348	0.572	1	3	ATP2A2
Epb41l2		GO: Molecular Function	GO:0019207	kinase regulator activity		0.005499	1	0.06168	0.4774	17	216	HMGB1,KIDINS220,PPP1R1B,LRRTM4,APC,BCCIP,PRKAR1A,GMFB,TESC,NPM1,CALM1,CALM2,GSTP1,PAK2,SPRED1,MAPK8IP2,CHP1				GO: Biological Process	GO:0006210	thymine catabolic process		0.005949	1	0.07348	0.572	1	3	ALDH6A1
Pde7b		GO: Molecular Function	GO:0045182	translation regulator activity		0.005799	1	0.06321	0.4893	6	42	ABCF1,PAIP2,CIRBP,PABPC1,CELF1,PAIP2B				GO: Biological Process	GO:0072275	metanephric glomerulus morphogenesis		0.005949	1	0.07348	0.572	1	3	PDGFRA
Stx7		GO: Molecular Function	GO:0019894	kinesin binding		0.005799	1	0.06321	0.4893	6	42	ATCAY,SNCA,KIF1B,SPAG9,KIF3A,MAPK8IP2				GO: Biological Process	GO:0098909	regulation of cardiac muscle cell action potential involved in regulation of contraction		0.005949	1	0.07348	0.572	1	3	ATP2A2
Hsp90b1		GO: Molecular Function	GO:0008320	protein transmembrane transporter activity		0.005822	1	0.06321	0.4893	4	19	TIMM23,TIMM17A,TOMM20,TOMM70				GO: Biological Process	GO:0008355	olfactory learning		0.005949	1	0.07348	0.572	1	3	GRIN1
Sar1a		GO: Molecular Function	GO:0004176	ATP-dependent peptidase activity		0.005978	1	0.06321	0.4893	3	10	YME1L1,AFG3L2,CRBN				GO: Biological Process	GO:0010643	cell communication by chemical coupling		0.005949	1	0.07348	0.572	1	3	DBN1
Rab21		GO: Molecular Function	GO:0070679	inositol 1,4,5 trisphosphate binding		0.005978	1	0.06321	0.4893	3	10	CYTH2,RPH3A,ITPR2				GO: Biological Process	GO:0021586	pons maturation		0.005949	1	0.07348	0.572	1	3	GRIN1
Nsg2		GO: Molecular Function	GO:0033130	acetylcholine receptor binding		0.005978	1	0.06321	0.4893	3	10	APP,ATP2B2,DLG4				GO: Biological Process	GO:1990036	calcium ion import into sarcoplasmic reticulum		0.005949	1	0.07348	0.572	1	3	ATP2A2
Sptbn1		GO: Molecular Function	GO:0043008	ATP-dependent protein binding		0.005978	1	0.06321	0.4893	3	10	DNAJC5,MYO5A,NSF				GO: Biological Process	GO:0006208	pyrimidine nucleobase catabolic process		0.005949	1	0.07348	0.572	1	3	ALDH6A1
Ccng1		GO: Molecular Function	GO:0001664	G-protein coupled receptor binding		0.006856	1	0.07139	0.5526	20	276	PENK,TSNAX,GRK2,PPP1R1B,DNAJA1,CX3CL1,HSPA8,SDCBP,ARRB1,CNIH4,FYN,ATP2A2,PSAP,DLG4,TAC1,DNM1,CALM1,CALM2,NSF,CAV2				GO: Biological Process	GO:0035790	platelet-derived growth factor receptor-alpha signaling pathway		0.005949	1	0.07348	0.572	1	3	PDGFRA
Acsl6		GO: Molecular Function	GO:0042287	MHC protein binding		0.006863	1	0.07139	0.5526	5	31	VCP,ATP5F1A,ATP5F1B,PDIA3,BCAP31				GO: Biological Process	GO:0072276	metanephric glomerulus vasculature morphogenesis		0.005949	1	0.07348	0.572	1	3	PDGFRA
Cyfip2		GO: Molecular Function	GO:0004674	protein serine/threonine kinase activity		0.007338	1	0.07573	0.5861	29	452	SPEG,CDK14,GRK2,AKT1,MAP4K4,NEK7,CASK,CSNK1E,PRKACA,MAST1,PNCK,PRKCZ,BRSK1,PRKX,MAST3,CDK19,BMPR1A,BMPR2,WNK2,TLK2,KALRN,CAMK4,CAMK2A,CAMK2B,GRK6,CIT,UHMK1,PAK2,DCLK1				GO: Biological Process	GO:1900673	olefin metabolic process		0.005949	1	0.07348	0.572	1	3	GRIN1
Ppp2ca		GO: Molecular Function	GO:0015077	monovalent inorganic cation transmembrane transporter activity		0.007764	1	0.07859	0.6083	25	375	SLC12A5,UQCRH,ATP5PD,COX6A1,COX6B1,COX7C,SLC1A1,SLC1A2,ATP6V1H,ATP6V0E2,ATP1A1,ATP1A2,SLC4A4,ATP5F1A,ATP5F1B,ATP5PF,ATP6V1C1,ATP6V1E1,ATP6V0B,ATP6V1G2,ATP6AP1,SLC9A7,KCNAB1,MTMR6,ATP6V0A2				GO: Biological Process	GO:0019859	thymine metabolic process		0.005949	1	0.07348	0.572	1	3	ALDH6A1
Sar1b		GO: Molecular Function	GO:0042803	protein homodimerization activity		0.007769	1	0.07859	0.6083	47	826	GPHN,KLHL2,ABAT,RPS19,NRN1,MEF2D,ADD1,FAAH,FASN,CADM1,FGFR1,USF2,FKBP1A,SDCBP,HSP90AA1,ZBTB4,BCAS1,ARF1,DROSHA,DYNLL1,SNX2,BMPR1A,PLCB1,SLC9A7,PYGB,TESC,ALDH5A1,GOT2,NPM1,ACSL6,TCF4,CAMK2A,CAMK2B,SYNE1,NTRK2,DNM1L,CAV2,ECE1,GSTM5,OXCT1,THRB,RNF4,SUDS3,RABEP1,PAFAH1B2,ENO1,TPD52				GO: Biological Process	GO:0030003	cellular cation homeostasis		0.005999	1	0.07348	0.572	5	592	GRIN1,ATP1A1,PDGFRA,ATP2A2,JPH3
Adcy1		GO: Molecular Function	GO:0060590	ATPase regulator activity		0.007874	1	0.07859	0.6083	5	32	PFN2,TOR1AIP1,HSPH1,RAB6A,DNAJB6				GO: Biological Process	GO:0055065	metal ion homeostasis		0.006041	1	0.07348	0.572	5	593	GRIN1,ATP1A1,PDGFRA,ATP2A2,JPH3
Gabrg2		GO: Molecular Function	GO:0046933	proton-transporting ATP synthase activity, rotational mechanism		0.007981	1	0.07859	0.6083	3	11	ATP5F1A,ATP5F1B,ATP6AP1				GO: Biological Process	GO:0010959	regulation of metal ion transport		0.006267	1	0.07553	0.5881	4	374	KIF5B,ATP1A1,SUMO1,JPH3
Rtn4		GO: Molecular Function	GO:0019211	phosphatase activator activity		0.007981	1	0.07859	0.6083	3	11	B3GAT3,CALM1,CALM2				GO: Biological Process	GO:0030001	metal ion transport		0.006323	1	0.07554	0.5881	6	855	GRIN1,KIF5B,ATP1A1,ATP2A2,SUMO1,JPH3
Dynll2		GO: Molecular Function	GO:0005388	calcium-transporting ATPase activity		0.007981	1	0.07859	0.6083	3	11	ATP2A2,ATP2B1,ATP2B2				GO: Biological Process	GO:0045666	positive regulation of neuron differentiation		0.006384	1	0.0756	0.5886	4	376	DBN1,SKIL,KALRN,RPL4
Ska2		GO: Molecular Function	GO:0017016	Ras GTPase binding		0.00829	1	0.08102	0.6271	20	281	RABGAP1,FMNL2,IPO8,RPH3A,ARHGDIA,RAB3GAP1,IPO9,PRKACA,RIMS2,TBC1D9B,ATP6AP1,MYO5A,VPS4A,RAC1,RAP1A,NSF,RAPGEF4,CIT,NUTF2,ACAP2				GO: Biological Process	GO:0006873	cellular ion homeostasis		0.006657	1	0.07814	0.6084	5	607	GRIN1,ATP1A1,PDGFRA,ATP2A2,JPH3
Acaca		GO: Molecular Function	GO:0003746	translation elongation factor activity		0.008445	1	0.08191	0.634	4	21	EEF1A1,EEF1A2,EEF1G,EIF5A				GO: Biological Process	GO:0032412	regulation of ion transmembrane transporter activity		0.007348	1	0.08293	0.6456	3	201	KIF5B,SUMO1,JPH3
Tspan13		GO: Molecular Function	GO:0050839	cell adhesion molecule binding		0.008575	1	0.08225	0.6366	16	208	CADM1,FGFR1,CX3CL1,SDCBP,EZR,ANK3,APC,NPTN,CTNNB1,ERBIN,PTPRD,CALR,THY1,ICAM5,NISCH,EMP2				GO: Biological Process	GO:0061178	regulation of insulin secretion involved in cellular response to glucose stimulus		0.007384	1	0.08293	0.6456	2	65	KIF5B,MAP4K4
Pum2		GO: Molecular Function	GO:0031267	small GTPase binding		0.008621	1	0.08225	0.6366	21	301	RABGAP1,FMNL2,IPO8,RPH3A,ARHGDIA,RAB3GAP1,IPO9,PRKACA,RIMS2,TBC1D9B,ATP6AP1,MYO5A,VPS4A,GDI2,RAC1,RAP1A,NSF,RAPGEF4,CIT,NUTF2,ACAP2				GO: Biological Process	GO:0060998	regulation of dendritic spine development		0.007384	1	0.08293	0.6456	2	65	DBN1,KALRN
Prkar1a		GO: Molecular Function	GO:0030628	pre-mRNA 3'-splice site binding		0.008863	1	0.08225	0.6366	2	4	U2AF2,HNRNPK				GO: Biological Process	GO:0043462	regulation of ATPase activity		0.007606	1	0.08293	0.6456	2	66	DBN1,SUMO1
Dld		GO: Molecular Function	GO:0070546	L-phenylalanine aminotransferase activity		0.008863	1	0.08225	0.6366	2	4	GOT1,GOT2				GO: Biological Process	GO:0060079	excitatory postsynaptic potential		0.00783	1	0.08293	0.6456	2	67	GRIN1,DBN1
Tlk2		GO: Molecular Function	GO:0005030	neurotrophin receptor activity		0.008863	1	0.08225	0.6366	2	4	SORT1,NTRK2				GO: Biological Process	GO:1903779	regulation of cardiac conduction		0.00783	1	0.08293	0.6456	2	67	ATP1A1,ATP2A2
Sumo2		GO: Molecular Function	GO:0047696	beta-adrenergic receptor kinase activity		0.008863	1	0.08225	0.6366	2	4	GRK2,GRK6				GO: Biological Process	GO:0022898	regulation of transmembrane transporter activity		0.00786	1	0.08293	0.6456	3	206	KIF5B,SUMO1,JPH3
Rabep1		GO: Molecular Function	GO:0016655	oxidoreductase activity, acting on NAD(P)H, quinone or similar compound as acceptor		0.00914	1	0.08422	0.6519	7	60	NDUFA8,NDUFA9,NDUFB8,NDUFB9,NDUFS4,NDUFV2,NDUFA13				GO: Biological Process	GO:1901896	positive regulation of calcium-transporting ATPase activity		0.007924	1	0.08293	0.6456	1	4	SUMO1
Ywhae		GO: Molecular Function	GO:0005509	calcium ion binding		0.009417	1	0.08615	0.6668	41	708	TTYH1,TPT1,HSP90B1,SPARCL1,SLC25A23,HPCAL4,VLDLR,PGS1,VSNL1,CHORDC1,RPH3A,SNCA,ATP2A2,ATP2B2,PCDHGA8,ATP5F1B,CLSTN3,TBC1D9B,MYO5A,SPTAN1,SRI,SPOCK2,NCL,ITPR2,NELL2,CCDC47,PLCB1,SYT1,TESC,CALM1,CALM2,CALR,CALU,PHF24,PCLO,NCS1,FSTL1,LRP1,CDH18,TPD52,CHP1				GO: Biological Process	GO:0006574	valine catabolic process		0.007924	1	0.08293	0.6456	1	4	ALDH6A1
Spag9		GO: Biological Process	GO:0099536	synaptic signaling		1.985e-25	1.149e-21	1.149e-21	1.061e-20	92	687	ABAT,MAPT,PAIP2,MBP,PENK,ETV5,GABARAP,RTN3,PFN2,MEF2C,HNRNPK,SLC12A5,GRK2,AKT1,CX3CL1,HSPA8,SDCBP,VDAC3,SLC1A1,SLC1A2,RPH3A,ARF1,CASK,NPTN,RAB3GAP1,NSMF,NAPB,PRKACA,DNAJC5,PRKCZ,CTNNB1,ATP1A2,SNCA,BRSK1,RIMS2,ATP2A2,PDE7B,ATP2B2,GABRA1,GABRB3,GABRG2,GAD1,CLSTN3,SNPH,MYO5A,MYO6,KIF1B,CPLX1,NCAM1,DBI,NCDN,PTN,PTPRD,SNAP91,PTPRN2,SV2B,GLRB,PLCB1,SYN1,SYN2,SYT1,DLG1,DLG4,TAC1,KIF5B,DNM1,RAC1,KRAS,CAC…				GO: Biological Process	GO:1990573	potassium ion import across plasma membrane		0.007924	1	0.08293	0.6456	1	4	ATP1A1
Cacnb1		GO: Biological Process	GO:0099537	trans-synaptic signaling		1.319e-24	7.633e-21	1.908e-21	1.763e-20	90	678	ABAT,MAPT,PAIP2,MBP,PENK,ETV5,GABARAP,RTN3,PFN2,MEF2C,HNRNPK,SLC12A5,AKT1,CX3CL1,HSPA8,SDCBP,VDAC3,SLC1A1,SLC1A2,RPH3A,ARF1,CASK,NPTN,RAB3GAP1,NSMF,NAPB,PRKACA,DNAJC5,PRKCZ,CTNNB1,ATP1A2,SNCA,BRSK1,RIMS2,ATP2A2,PDE7B,ATP2B2,GABRA1,GABRB3,GABRG2,GAD1,CLSTN3,SNPH,MYO5A,MYO6,KIF1B,CPLX1,NCAM1,DBI,NCDN,PTN,PTPRD,SNAP91,PTPRN2,SV2B,GLRB,SYN1,SYN2,SYT1,DLG1,DLG4,TAC1,KIF5B,DNM1,RAC1,KRAS,CACNA1A,CACNB1…				GO: Biological Process	GO:2000623	negative regulation of nuclear-transcribed mRNA catabolic process, nonsense-mediated decay		0.007924	1	0.08293	0.6456	1	4	PABPC1
Dlg4		GO: Biological Process	GO:0007268	chemical synaptic transmission		1.319e-24	7.633e-21	1.908e-21	1.763e-20	90	678	ABAT,MAPT,PAIP2,MBP,PENK,ETV5,GABARAP,RTN3,PFN2,MEF2C,HNRNPK,SLC12A5,AKT1,CX3CL1,HSPA8,SDCBP,VDAC3,SLC1A1,SLC1A2,RPH3A,ARF1,CASK,NPTN,RAB3GAP1,NSMF,NAPB,PRKACA,DNAJC5,PRKCZ,CTNNB1,ATP1A2,SNCA,BRSK1,RIMS2,ATP2A2,PDE7B,ATP2B2,GABRA1,GABRB3,GABRG2,GAD1,CLSTN3,SNPH,MYO5A,MYO6,KIF1B,CPLX1,NCAM1,DBI,NCDN,PTN,PTPRD,SNAP91,PTPRN2,SV2B,GLRB,SYN1,SYN2,SYT1,DLG1,DLG4,TAC1,KIF5B,DNM1,RAC1,KRAS,CACNA1A,CACNB1…				GO: Biological Process	GO:0090325	regulation of locomotion involved in locomotory behavior		0.007924	1	0.08293	0.6456	1	4	DBN1
Myh10		GO: Biological Process	GO:0098916	anterograde trans-synaptic signaling		1.319e-24	7.633e-21	1.908e-21	1.763e-20	90	678	ABAT,MAPT,PAIP2,MBP,PENK,ETV5,GABARAP,RTN3,PFN2,MEF2C,HNRNPK,SLC12A5,AKT1,CX3CL1,HSPA8,SDCBP,VDAC3,SLC1A1,SLC1A2,RPH3A,ARF1,CASK,NPTN,RAB3GAP1,NSMF,NAPB,PRKACA,DNAJC5,PRKCZ,CTNNB1,ATP1A2,SNCA,BRSK1,RIMS2,ATP2A2,PDE7B,ATP2B2,GABRA1,GABRB3,GABRG2,GAD1,CLSTN3,SNPH,MYO5A,MYO6,KIF1B,CPLX1,NCAM1,DBI,NCDN,PTN,PTPRD,SNAP91,PTPRN2,SV2B,GLRB,SYN1,SYN2,SYT1,DLG1,DLG4,TAC1,KIF5B,DNM1,RAC1,KRAS,CACNA1A,CACNB1…				GO: Biological Process	GO:1902897	regulation of postsynaptic density protein 95 clustering		0.007924	1	0.08293	0.6456	1	4	DBN1
Nmt1		GO: Biological Process	GO:0072657	protein localization to membrane		1.032e-23	5.97e-20	1.194e-20	1.103e-19	76	515	GPHN,RPL30,RPL27A,RAB11B,RPL35A,RPL36A,RPS3,RPS5,RPS6,RPS15,RPS15A,ETV5,RPS17,RPS19,RPS21,RPS23,RPS24,RFTN2,RPL23,AP2M1,LRRTM4,CLTC,AKT1,STX7,SEC61A1,SDCBP,HSP90AA1,EZR,DPP10,ANK2,ANK3,TMEM59,SORBS1,YWHAE,YWHAZ,RAB3GAP1,DYNLL2,DYNLL1,PRKCZ,VAMP4,MYO5A,VPS4A,SPTBN1,SSR3,PTN,GLRB,ARHGEF9,DLG1,DLG4,TESC,KIF5B,NMT1,PID1,RAC1,CACNA1A,CACNB1,KALRN,NSF,NDUFA13,EMP2,SEC63,RPL13A,FLOT1,RPL3,RPL4,RPL5,RPL6…				GO: Biological Process	GO:2000622	regulation of nuclear-transcribed mRNA catabolic process, nonsense-mediated decay		0.007924	1	0.08293	0.6456	1	4	PABPC1
Sel1l		GO: Biological Process	GO:0070972	protein localization to endoplasmic reticulum		1.254e-22	7.255e-19	1.209e-19	1.117e-18	37	125	RPL30,RPL27A,RPL35A,RPL36A,RPS3,RPS5,RPS6,RPS15,RPS15A,RPS17,RPS19,RPS21,RPS23,RPS24,RPL23,SEC61A1,ANK2,SPCS1,RAB3GAP1,SSR3,OS9,PDIA3,BCAP31,SEC63,RPL13A,RPL3,RPL4,RPL5,RPL6,RPL7A,RPL9,RPL11,RPL12,RPL13,RPL17,RPL18,RPL19				GO: Biological Process	GO:0006816	calcium ion transport		0.008259	1	0.08577	0.6678	4	405	GRIN1,ATP2A2,SUMO1,JPH3
Sptlc2		GO: Biological Process	GO:0072599	establishment of protein localization to endoplasmic reticulum		4.355e-21	2.52e-17	3.599e-18	3.326e-17	33	106	RPL30,RPL27A,RPL35A,RPL36A,RPS3,RPS5,RPS6,RPS15,RPS15A,RPS17,RPS19,RPS21,RPS23,RPS24,RPL23,SEC61A1,SPCS1,RAB3GAP1,SSR3,SEC63,RPL13A,RPL3,RPL4,RPL5,RPL6,RPL7A,RPL9,RPL11,RPL12,RPL13,RPL17,RPL18,RPL19				GO: Biological Process	GO:0006874	cellular calcium ion homeostasis		0.008688	1	0.08833	0.6877	4	411	GRIN1,PDGFRA,ATP2A2,JPH3
Tmx1		GO: Biological Process	GO:0006614	SRP-dependent cotranslational protein targeting to membrane		9.989e-21	5.78e-17	7.224e-18	6.676e-17	31	94	RPL30,RPL27A,RPL35A,RPL36A,RPS3,RPS5,RPS6,RPS15,RPS15A,RPS17,RPS19,RPS21,RPS23,RPS24,RPL23,SEC61A1,SSR3,SEC63,RPL13A,RPL3,RPL4,RPL5,RPL6,RPL7A,RPL9,RPL11,RPL12,RPL13,RPL17,RPL18,RPL19				GO: Biological Process	GO:1904375	regulation of protein localization to cell periphery		0.008757	1	0.08833	0.6877	2	71	KIF5B,KALRN
Rtn1		GO: Biological Process	GO:0045047	protein targeting to ER		1.331e-20	7.701e-17	8.557e-18	7.907e-17	32	102	RPL30,RPL27A,RPL35A,RPL36A,RPS3,RPS5,RPS6,RPS15,RPS15A,RPS17,RPS19,RPS21,RPS23,RPS24,RPL23,SEC61A1,SPCS1,SSR3,SEC63,RPL13A,RPL3,RPL4,RPL5,RPL6,RPL7A,RPL9,RPL11,RPL12,RPL13,RPL17,RPL18,RPL19				GO: Biological Process	GO:1903076	regulation of protein localization to plasma membrane		0.008757	1	0.08833	0.6877	2	71	KIF5B,KALRN
Atp6v1d		GO: Biological Process	GO:0090150	establishment of protein localization to membrane		7.264e-20	4.203e-16	4.203e-17	3.884e-16	59	377	RPL30,RPL27A,RAB11B,RPL35A,RPL36A,RPS3,RPS5,RPS6,RPS15,RPS15A,RPS17,RPS19,RPS21,RPS23,RPS24,RFTN2,RPL23,AKT1,SEC61A1,SDCBP,HSP90AA1,EZR,DPP10,ANK2,ANK3,TMEM59,SORBS1,YWHAE,YWHAZ,RAB3GAP1,DYNLL2,DYNLL1,VAMP4,SPTBN1,SSR3,DLG1,TESC,KIF5B,NMT1,PID1,CACNB1,NSF,NDUFA13,SEC63,RPL13A,FLOT1,RPL3,RPL4,RPL5,RPL6,RPL7A,RPL9,RPL11,RPL12,RPL13,RPL17,CHP1,RPL18,RPL19				GO: Biological Process	GO:0043065	positive regulation of apoptotic process		0.008767	1	0.08833	0.6877	5	649	TSC22D1,GRIN1,SKIL,KALRN,ITSN1
Srsf5		GO: Biological Process	GO:0006613	cotranslational protein targeting to membrane		1.103e-19	6.385e-16	5.804e-17	5.363e-16	31	101	RPL30,RPL27A,RPL35A,RPL36A,RPS3,RPS5,RPS6,RPS15,RPS15A,RPS17,RPS19,RPS21,RPS23,RPS24,RPL23,SEC61A1,SSR3,SEC63,RPL13A,RPL3,RPL4,RPL5,RPL6,RPL7A,RPL9,RPL11,RPL12,RPL13,RPL17,RPL18,RPL19				GO: Biological Process	GO:0043068	positive regulation of programmed cell death		0.009103	1	0.08929	0.6951	5	655	TSC22D1,GRIN1,SKIL,KALRN,ITSN1
Zmynd11		GO: Biological Process	GO:0006413	translational initiation		5.933e-19	3.433e-15	2.861e-16	2.643e-15	41	194	RPL30,RPL27A,RPL35A,ABCF1,RPL36A,RPS3,PAIP2,RPS5,RPS6,RPS15,RPS15A,RPS17,RPS19,RPS21,RPS23,RPS24,RPL23,PABPC1,DENR,EIF5B,EIF3H,PAIP2B,NPM1,EIF1AX,EIF4A2,UHMK1,EIF4G2,EIF5,RPL13A,RPL3,RPL4,RPL5,RPL6,RPL7A,RPL9,RPL11,RPL12,RPL13,RPL17,RPL18,RPL19				GO: Biological Process	GO:0035773	insulin secretion involved in cellular response to glucose stimulus		0.009237	1	0.08929	0.6951	2	73	KIF5B,MAP4K4
Lgmn		GO: Biological Process	GO:0000184	nuclear-transcribed mRNA catabolic process, nonsense-mediated decay		3.619e-17	2.094e-13	1.611e-14	1.489e-13	31	121	RPL30,RPL27A,RPL35A,RPL36A,RPS3,RPS5,RPS6,RPS15,RPS15A,RPS17,RPS19,RPS21,RPS23,RPS24,RPL23,PABPC1,PPP2CA,UHMK1,RPL13A,RPL3,RPL4,RPL5,RPL6,RPL7A,RPL9,RPL11,RPL12,RPL13,RPL17,RPL18,RPL19				GO: Biological Process	GO:1901019	regulation of calcium ion transmembrane transporter activity		0.009482	1	0.08929	0.6951	2	74	SUMO1,JPH3
Gdi2		GO: Biological Process	GO:0033365	protein localization to organelle		1.021e-16	5.908e-13	4.22e-14	3.9e-13	92	919	RPL30,RPL27A,RPL35A,RPL36A,RPS3,CFL1,RPS5,RPS6,RPS15,RPS15A,TIMM23,U2AF2,RPS17,RPS19,RPS21,RPS23,RPS24,RPL23,ATP6V1D,TIMM17A,AKT1,DNAJA1,SEC61A1,HSPA8,HSP90AA1,EZR,IPO8,ANK2,SPCS1,NPEPPS,CCT2,YWHAE,YWHAZ,MAPRE1,PPP2CA,ARL1,PPP2R2B,RAB3GAP1,RGS20,IPO9,CCT5,DYNLL2,DYNLL1,CTNNB1,FYN,TOR1AIP1,MXI1,ATRX,SPTBN1,HSPH1,SRI,TOMM20,SSR3,DHX9,OTUD7B,TOMM70,BMPR1A,AFG3L2,VPS13A,OS9,NMT1,RAB6A,NPM1,CALR,SYNE1…				GO: Biological Process	GO:0032409	regulation of transporter activity		0.009519	1	0.08929	0.6951	3	221	KIF5B,SUMO1,JPH3
Npc2		GO: Biological Process	GO:0006612	protein targeting to membrane		1.722e-16	9.966e-13	6.644e-14	6.139e-13	38	194	RPL30,RPL27A,RPL35A,RPL36A,RPS3,RPS5,RPS6,RPS15,RPS15A,RPS17,RPS19,RPS21,RPS23,RPS24,RPL23,SEC61A1,SDCBP,ANK2,ANK3,SPTBN1,SSR3,TESC,CACNB1,SEC63,RPL13A,RPL3,RPL4,RPL5,RPL6,RPL7A,RPL9,RPL11,RPL12,RPL13,RPL17,CHP1,RPL18,RPL19				GO: Biological Process	GO:0006813	potassium ion transport		0.009636	1	0.08929	0.6951	3	222	KIF5B,ATP1A1,SUMO1
Evl		GO: Biological Process	GO:0031175	neuron projection development		2.844e-15	1.645e-11	1.028e-12	9.503e-12	91	953	MAP2,MAP4,MAPT,CFL1,CYTH2,MBP,HMGB1,NRN1,CHN1,ADCY1,MEF2C,HNRNPK,SLC12A5,MKL2,KIDINS220,NEGR1,AKT1,FGFR1,QKI,MAP4K4,PREX1,PLXNB1,EZR,EVL,VLDLR,ANK3,ATCAY,APC,GAS7,APP,CPNE5,ARF1,ARHGDIA,NPTN,NSMF,PRKCZ,BRSK1,RAB21,RIMS2,FYN,NDRG4,MYH10,GAP43,MYO6,SPTAN1,SPTBN1,RAP1GAP2,NCAM1,ZEB2,NCDN,NRP2,PTN,BMPR2,PTPRD,SNAP91,PTPRZ1,AFG3L2,SYT1,DLG4,ITM2C,KIF5B,KIF5C,CAMSAP2,RAC1,KRAS,CACNA1A,ACSL6,RAP1A,KALRN…				GO: Biological Process	GO:0055074	calcium ion homeostasis		0.009745	1	0.08929	0.6951	4	425	GRIN1,PDGFRA,ATP2A2,JPH3
Meg3		GO: Biological Process	GO:0006605	protein targeting		1.429e-14	8.268e-11	4.863e-12	4.494e-11	75	723	RPL30,RPL27A,RPL35A,RPL36A,RPS3,CFL1,RPS5,RPS6,RPS15,RPS15A,TIMM23,GABARAP,U2AF2,RPS17,RPS19,RPS21,RPS23,RPS24,RPL23,TIMM17A,AKT1,SEC61A1,HSPA8,SDCBP,HSP90AA1,IPO8,ANK2,ANK3,SPCS1,NPEPPS,YWHAE,YWHAZ,TRAK1,PPP2CA,PPP2R2B,RGS20,IPO9,TRAK2,CTNNB1,MXI1,MYO6,SPTBN1,SRI,TOMM20,SSR3,ERBIN,TOMM70,BMPR1A,AFG3L2,VPS13A,OS9,TESC,RAB6A,CACNB1,VTI1A,PDIA3,NDUFA13,UBL5,SYNGR1,NUTF2,SEC63,RPL13A,RPL3,RPL4,RPL5,…				GO: Biological Process	GO:0050882	voluntary musculoskeletal movement		0.009896	1	0.08929	0.6951	1	5	VTI1A
Hsp90aa1		GO: Biological Process	GO:0000956	nuclear-transcribed mRNA catabolic process		2.351e-14	1.36e-10	7.558e-12	6.984e-11	36	202	RPL30,RPL27A,RPL35A,RPL36A,RPS3,RPS5,RPS6,RPS15,RPS15A,RPS17,RPS19,RPS21,RPS23,RPS24,RPL23,NOCT,TNRC6C,PABPC1,PPP2CA,THRAP3,PAPD5,EIF4A2,UHMK1,RPL13A,RPL3,RPL4,RPL5,RPL6,RPL7A,RPL9,RPL11,RPL12,RPL13,RPL17,RPL18,RPL19				GO: Biological Process	GO:0045875	negative regulation of sister chromatid cohesion		0.009896	1	0.08929	0.6951	1	5	ATRX
Eif5		GO: Biological Process	GO:0072594	establishment of protein localization to organelle		4.112e-14	2.379e-10	1.252e-11	1.157e-10	71	676	RPL30,RPL27A,RPL35A,RPL36A,RPS3,CFL1,RPS5,RPS6,RPS15,RPS15A,TIMM23,U2AF2,RPS17,RPS19,RPS21,RPS23,RPS24,RPL23,TIMM17A,AKT1,SEC61A1,HSPA8,HSP90AA1,IPO8,SPCS1,NPEPPS,CCT2,YWHAE,YWHAZ,PPP2CA,PPP2R2B,RAB3GAP1,RGS20,IPO9,CCT5,DYNLL2,DYNLL1,CTNNB1,MXI1,SPTBN1,HSPH1,SRI,TOMM20,SSR3,TOMM70,BMPR1A,AFG3L2,VPS13A,NMT1,RAB6A,LAMP1,VTI1A,PDIA3,NDUFA13,UBL5,NUTF2,SEC63,RPL13A,RPL3,RPL4,RPL5,RPL6,RPL7A,RPL9,RPL1…				GO: Biological Process	GO:0031944	negative regulation of glucocorticoid metabolic process		0.009896	1	0.08929	0.6951	1	5	ATP1A1
Gpld1		GO: Biological Process	GO:0050804	modulation of chemical synaptic transmission		9.125e-14	5.28e-10	2.64e-11	2.439e-10	48	357	ABAT,MAPT,PAIP2,PFN2,MEF2C,HNRNPK,ARF1,NPTN,RAB3GAP1,NSMF,NAPB,PRKACA,PRKCZ,ATP1A2,SNCA,RIMS2,ATP2A2,ATP2B2,CLSTN3,MYO6,NCAM1,DBI,NCDN,PTN,SYN1,SYT1,DLG4,TAC1,KIF5B,DNM1,KRAS,CACNA1A,RAP1A,RAP1B,NRGN,KALRN,CAMK2A,CAMK2B,NTRK2,RAPGEF4,SHISA7,NCS1,PEBP1,NISCH,SYNGR1,FLOT1,MAPK8IP2,JPH3				GO: Biological Process	GO:0032971	regulation of muscle filament sliding		0.009896	1	0.08929	0.6951	1	5	DBN1
Cap2		GO: Biological Process	GO:0006402	mRNA catabolic process		2.605e-13	1.507e-09	7.178e-11	6.633e-10	36	218	RPL30,RPL27A,RPL35A,RPL36A,RPS3,RPS5,RPS6,RPS15,RPS15A,RPS17,RPS19,RPS21,RPS23,RPS24,RPL23,NOCT,TNRC6C,PABPC1,PPP2CA,THRAP3,PAPD5,EIF4A2,UHMK1,RPL13A,RPL3,RPL4,RPL5,RPL6,RPL7A,RPL9,RPL11,RPL12,RPL13,RPL17,RPL18,RPL19				GO: Biological Process	GO:0072104	glomerular capillary formation		0.009896	1	0.08929	0.6951	1	5	PDGFRA
Ctsl		GO: Biological Process	GO:0034622	cellular protein-containing complex assembly		5.539e-13	3.205e-09	1.457e-10	1.346e-09	88	991	MAPT,RPS3,RPS5,RPS15,RPS17,HMGB1,RPS19,PFN2,ADD1,MTPN,CIRBP,MID1IP1,NOCT,FKBP1A,PREX1,VBP1,HSP90AA1,EVL,SRSF5,APC,GAS7,CCT2,SAR1A,SF1,DENR,ARF1,MAPRE1,GDA,RAB3GAP1,SIRT2,NSG2,CELF1,NAPB,LUC7L2,NSG1,CLINT1,EIF3H,SNCA,VAMP4,ATP6AP1,ATRX,SPTAN1,SPTBN1,PSMC6,NCAM1,TOMM20,PSMD5,PSMD11,NDUFA8,NDUFA9,NDUFB8,NDUFB9,JMY,NDUFS4,NDUFV2,SNAP91,FAM103A1,VAMP1,DLG1,GMFB,DYNC1H1,RAC1,RBX1,NPM1,TCF4,CALR,RTN4,CA…				GO: Biological Process	GO:0072103	glomerulus vasculature morphogenesis		0.009896	1	0.08929	0.6951	1	5	PDGFRA
Ptdss1		GO: Biological Process	GO:0006518	peptide metabolic process		7.928e-13	4.587e-09	1.994e-10	1.843e-09	79	847	RPL30,RPL27A,RPL35A,ABCF1,RPL36A,RPS3,PAIP2,RPS5,RPS6,MRPL30,RPS15,RPS15A,BACE1,RPS17,RPS19,RPS21,RPS23,RPS24,MTPN,CIRBP,RPL23,RPL7L1,AKT1,QKI,SLC25A23,SPCS1,SCG5,NPEPPS,TNRC6C,APP,PABPC1,DENR,NCOR2,CELF1,DROSHA,CSNK1E,MRPL48,EIF5B,GIGYF2,EIF3H,NACA,PAIP2B,SEC11C,DARS,GLO1,PCSK1N,ALDH5A1,NPM1,CALR,PUM2,ECE1,EEF1A1,EEF1A2,GSTM5,SLC25A22,GSTP1,EEF1G,TRAP1,EIF1AX,ATP6AP2,ZNF706,EIF4A2,UHMK1,EIF4G2,E…				GO: Biological Process	GO:0031947	negative regulation of glucocorticoid biosynthetic process		0.009896	1	0.08929	0.6951	1	5	ATP1A1
Hnrnpk		GO: Biological Process	GO:0006401	RNA catabolic process		2.576e-12	1.491e-08	6.135e-10	5.669e-09	37	247	RPL30,RPL27A,RPL35A,RPL36A,RPS3,RPS5,RPS6,RPS15,RPS15A,RPS17,RPS19,RPS21,RPS23,RPS24,RPL23,NOCT,TNRC6C,PABPC1,PPP2CA,DROSHA,THRAP3,PAPD5,EIF4A2,UHMK1,RPL13A,RPL3,RPL4,RPL5,RPL6,RPL7A,RPL9,RPL11,RPL12,RPL13,RPL17,RPL18,RPL19				GO: Biological Process	GO:0019482	beta-alanine metabolic process		0.009896	1	0.08929	0.6951	1	5	ALDH6A1
Agtpbp1		GO: Biological Process	GO:0031344	regulation of cell projection organization		2.651e-12	1.534e-08	6.135e-10	5.669e-09	66	657	MAP2,MAP4,MAPT,CFL1,CYTH2,MBP,RABGAP1,PFN2,CHN1,MEF2C,HNRNPK,KIDINS220,NEGR1,AKT1,FGFR1,QKI,MAP4K4,PREX1,PLXNB1,HSP90AA1,VDAC3,EZR,EVL,VLDLR,APC,CPNE5,ARF1,ARHGDIA,NPTN,NSMF,PPP1R16B,RAB21,RIMS2,FYN,NDRG4,TBC1D9B,GAP43,MYO10,RAP1GAP2,ZEB2,PTN,BMPR2,PTPRD,PTPRZ1,SYT1,ITM2C,RAC1,CACNA1A,ACSL6,RAP1A,KALRN,CAMK2B,SYNE1,NTRK2,RTN4,RAPGEF4,STMN2,CIT,NCS1,KCTD17,EEF1A1,THY1,EIF4G2,LRP1,CDC42,RPL4				GO: Biological Process	GO:1902373	negative regulation of mRNA catabolic process		0.009896	1	0.08929	0.6951	1	5	PABPC1
Tppp		GO: Biological Process	GO:0006412	translation		5.229e-12	3.025e-08	1.164e-09	1.075e-08	66	667	RPL30,RPL27A,RPL35A,ABCF1,RPL36A,RPS3,PAIP2,RPS5,RPS6,MRPL30,RPS15,RPS15A,RPS17,RPS19,RPS21,RPS23,RPS24,MTPN,CIRBP,RPL23,RPL7L1,AKT1,QKI,SLC25A23,TNRC6C,APP,PABPC1,DENR,NCOR2,CELF1,DROSHA,MRPL48,EIF5B,GIGYF2,EIF3H,NACA,PAIP2B,DARS,NPM1,CALR,PUM2,EEF1A1,EEF1A2,SLC25A22,EEF1G,TRAP1,EIF1AX,ZNF706,EIF4A2,UHMK1,EIF4G2,EIF5,EIF5A,RPL13A,RPL3,RPL4,RPL5,RPL6,RPL7A,RPL9,RPL11,RPL12,RPL13,RPL17,RPL18,RPL19				GO: Biological Process	GO:0043269	regulation of ion transport		0.009921	1	0.08929	0.6951	5	669	GRIN1,KIF5B,ATP1A1,SUMO1,JPH3
Sdha		GO: Biological Process	GO:0001505	regulation of neurotransmitter levels		1.784e-11	1.032e-07	3.823e-09	3.533e-08	33	214	ABAT,PDE1B,PFN2,MEF2C,HSPA8,RPH3A,CASK,RAB3GAP1,NAPB,DNAJC5,ATP1A2,SNCA,BRSK1,RIMS2,ATP2A2,GAD1,SNPH,CPLX1,SNAP91,PTPRN2,SYN1,SYN2,SYT1,ALDH5A1,AGTPBP1,CACNA1A,RAP1A,RAP1B,CAMK2A,NTRK2,PCLO,PIP5K1C,PEBP1				GO: Cellular Component	GO:0045202	synapse		3.235e-05	0.006955	0.005817	0.03461	9	870	VTI1A,GRIN1,DBN1,ATP1A1,KALRN,MAP4,ATP2A2,SUMO1,ITSN1
Aggf1		GO: Biological Process	GO:0016482	cytosolic transport		2.023e-11	1.171e-07	4.18e-09	3.863e-08	68	720	U2AF2,PFN2,SORT1,CLTC,FKBP1A,HSP90AA1,EZR,ANK2,NPEPPS,RAB14,RAB6B,SAR1A,RPH3A,ARF1,PPP1CC,PPP2CA,ARL1,RAB3GAP1,RGS20,NAPB,VPS35,PRKACA,DNAJC5,TMED9,CTNNB1,ATP1A2,SNCA,VAMP4,RAB21,RIMS2,ATP2A2,SNX2,MXI1,SNX5,SNPH,MYO5A,SRI,CPLX1,DBI,BMPR1A,YIPF5,VPS13A,SYN1,SYT1,OS9,DNM1,RAB6A,CACNA1A,RAP1A,RAP1B,CALM1,CALM2,CAMK4,PCLO,LAMP1,VTI1A,SPAG9,PIP5K1C,AKTIP,BCAP31,UBL5,THY1,UHMK1,NUTF2,EMP2,STX6,JPH3,CHP1				GO: Cellular Component	GO:0099572	postsynaptic specialization		8.117e-05	0.01745	0.005817	0.03461	5	232	GRIN1,DBN1,ATP1A1,KALRN,MAP4
Scamp1		GO: Biological Process	GO:0043043	peptide biosynthetic process		3.42e-11	1.979e-07	6.687e-09	6.179e-08	66	696	RPL30,RPL27A,RPL35A,ABCF1,RPL36A,RPS3,PAIP2,RPS5,RPS6,MRPL30,RPS15,RPS15A,RPS17,RPS19,RPS21,RPS23,RPS24,MTPN,CIRBP,RPL23,RPL7L1,AKT1,QKI,SLC25A23,TNRC6C,APP,PABPC1,DENR,NCOR2,CELF1,DROSHA,MRPL48,EIF5B,GIGYF2,EIF3H,NACA,PAIP2B,DARS,NPM1,CALR,PUM2,EEF1A1,EEF1A2,SLC25A22,EEF1G,TRAP1,EIF1AX,ZNF706,EIF4A2,UHMK1,EIF4G2,EIF5,EIF5A,RPL13A,RPL3,RPL4,RPL5,RPL6,RPL7A,RPL9,RPL11,RPL12,RPL13,RPL17,RPL18,RPL19				GO: Cellular Component	GO:0014069	postsynaptic density		8.117e-05	0.01745	0.005817	0.03461	5	232	GRIN1,DBN1,ATP1A1,KALRN,MAP4
Jmy		GO: Biological Process	GO:0016071	mRNA metabolic process		3.467e-11	2.006e-07	6.687e-09	6.179e-08	64	664	RPL30,RPL27A,RPL35A,RPL36A,RPS3,RPS5,RBM10,RPS6,RPS15,RPS15A,U2AF2,RPS17,RPS19,RPS21,RPS23,RPS24,HNRNPK,RPL23,ZRANB2,NOCT,QKI,HSPA8,SFPQ,SRSF3,SRSF5,SRSF7,TNRC6C,SYF2,APP,PABPC1,SF1,PPP2CA,CELF1,LUC7L2,PRKACA,FUS,CHTOP,DNAJB11,AHCYL1,DHX9,FAM103A1,PLCB1,THRAP3,NPM1,PAPD5,TMBIM6,UBL5,PSIP1,CELF3,EIF4A2,UHMK1,RPL13A,RPL3,RPL4,RPL5,RPL6,RPL7A,RPL9,RPL11,RPL12,RPL13,RPL17,RPL18,RPL19				GO: Cellular Component	GO:0060076	excitatory synapse		0.0001197	0.02575	0.006436	0.0383	5	252	GRIN1,DBN1,ATP1A1,KALRN,MAP4
Erbin		GO: Biological Process	GO:0019083	viral transcription		5.859e-11	3.39e-07	1.094e-08	1.011e-07	29	176	RPL30,RPL27A,RPL35A,RPL36A,RPS3,RPS5,RPS6,RPS15,RPS15A,RPS17,RPS19,RPS21,RPS23,RPS24,RPL23,USF2,RPL13A,RPL3,RPL4,RPL5,RPL6,RPL7A,RPL9,RPL11,RPL12,RPL13,RPL17,RPL18,RPL19				GO: Cellular Component	GO:0035253	ciliary rootlet		0.0001634	0.03513	0.007025	0.0418	2	10	KIF5A,KIF5B
Pdhb		GO: Biological Process	GO:0007270	neuron-neuron synaptic transmission		6.233e-11	3.607e-07	1.127e-08	1.041e-07	27	154	MEF2C,VDAC3,RAB3GAP1,NAPB,PRKACA,ATP1A2,SNCA,GABRA1,GABRB3,GABRG2,CLSTN3,KIF1B,DBI,GLRB,SYT1,TAC1,KIF5B,DNM1,RAC1,KRAS,CACNA1A,KALRN,CAMK4,NTRK2,NISCH,FLOT1,MAPK8IP2				GO: Cellular Component	GO:0033267	axon part		0.0003087	0.06638	0.01106	0.06583	5	309	VTI1A,GRIN1,KIF5B,DBN1,ITSN1
Fam107a		GO: Biological Process	GO:0099643	signal release from synapse		2.38e-10	1.377e-06	4.05e-08	3.742e-07	27	163	PFN2,MEF2C,HSPA8,RPH3A,CASK,RAB3GAP1,NAPB,DNAJC5,SNCA,BRSK1,RIMS2,ATP2A2,GAD1,SNPH,CPLX1,SNAP91,PTPRN2,SYN1,SYN2,SYT1,CACNA1A,RAP1A,RAP1B,CAMK2A,NTRK2,PCLO,PIP5K1C				GO: Cellular Component	GO:0044456	synapse part		0.0003684	0.07921	0.01132	0.06733	7	708	VTI1A,GRIN1,DBN1,ATP1A1,KALRN,MAP4,ITSN1
Ndufs4		GO: Biological Process	GO:0007269	neurotransmitter secretion		2.38e-10	1.377e-06	4.05e-08	3.742e-07	27	163	PFN2,MEF2C,HSPA8,RPH3A,CASK,RAB3GAP1,NAPB,DNAJC5,SNCA,BRSK1,RIMS2,ATP2A2,GAD1,SNPH,CPLX1,SNAP91,PTPRN2,SYN1,SYN2,SYT1,CACNA1A,RAP1A,RAP1B,CAMK2A,NTRK2,PCLO,PIP5K1C				GO: Cellular Component	GO:0090533	cation-transporting ATPase complex		0.0004325	0.09298	0.01162	0.06916	2	16	ATP1A1,ATP2A2
Thrb		GO: Biological Process	GO:0019080	viral gene expression		2.624e-10	1.518e-06	4.338e-08	4.008e-07	29	187	RPL30,RPL27A,RPL35A,RPL36A,RPS3,RPS5,RPS6,RPS15,RPS15A,RPS17,RPS19,RPS21,RPS23,RPS24,RPL23,USF2,RPL13A,RPL3,RPL4,RPL5,RPL6,RPL7A,RPL9,RPL11,RPL12,RPL13,RPL17,RPL18,RPL19				GO: Cellular Component	GO:0030424	axon		0.0007152	0.1538	0.01709	0.1017	6	567	VTI1A,GRIN1,KIF5A,KIF5B,DBN1,ITSN1
Bmpr1a		GO: Biological Process	GO:0006897	endocytosis		2.779e-10	1.608e-06	4.466e-08	4.127e-07	62	665	RAB11B,HSP90B1,CYTH2,ACTG1,HMGB1,LDLRAD3,HNRNPK,ADD1,SORT1,AP2M1,GRK2,CLTC,HSPA8,SDCBP,HSP90AA1,EZR,VLDLR,SCAMP1,APP,RAB14,CYFIP2,ARF1,ATP6V1H,ARRB1,ELMO2,CSNK1E,CLINT1,SNCA,RAB21,FYN,SNX2,ATP5F1B,SNX5,GAPVD1,SNPH,MYO6,MYO10,HSPH1,NCL,CDC42SE2,SNAP91,MLC1,SYT1,DLG4,DNM1,RAC1,RAP1A,CALR,SYNE1,HIP1R,GRB2,DNM1L,CAV2,ATP9A,PIP5K1C,KIF3A,RABEP1,ICAM5,LRP1,LRPAP1,FLOT1,CDC42				GO: Cellular Component	GO:0016605	PML body		0.0009289	0.1997	0.01916	0.114	3	99	SKIL,ATRX,SUMO1
Txndc16		GO: Biological Process	GO:0010975	regulation of neuron projection development		3.003e-10	1.738e-06	4.696e-08	4.339e-07	51	492	MAP2,MAPT,CFL1,CYTH2,MBP,CHN1,MEF2C,HNRNPK,KIDINS220,NEGR1,AKT1,FGFR1,QKI,MAP4K4,PREX1,PLXNB1,VLDLR,CPNE5,ARF1,ARHGDIA,NPTN,NSMF,RAB21,RIMS2,FYN,NDRG4,RAP1GAP2,ZEB2,PTN,BMPR2,PTPRD,PTPRZ1,SYT1,ITM2C,CACNA1A,ACSL6,RAP1A,KALRN,CAMK2B,SYNE1,NTRK2,RTN4,RAPGEF4,STMN2,CIT,NCS1,EEF1A1,THY1,EIF4G2,LRP1,RPL4				GO: Cellular Component	GO:0098533	ATPase dependent transmembrane transport complex		0.000985	0.2118	0.01916	0.114	2	24	ATP1A1,ATP2A2
Psmc6		GO: Biological Process	GO:0044265	cellular macromolecule catabolic process		3.725e-10	2.155e-06	5.672e-08	5.241e-07	80	977	RPL30,RPL27A,HSP90B1,RPL35A,RPL36A,RPS3,RPS5,RPS6,MARCH6,RPS15,RPS15A,RPS17,HMGB1,RPS19,RPS21,RPS23,RPS24,WAC,RPL23,UBE2A,UBE2I,AKT1,SPOP,NOCT,SDCBP,VCP,PCYOX1,SEL1L,EZR,RNF44,APC,TNRC6C,PABPC1,PPP2CA,RNF7,SIRT2,ARRB1,DROSHA,CSNK1E,PRKACA,UBR3,SUMO2,CTNNB1,CTSL,YME1L1,LGMN,VPS4A,PSMC6,PSMD5,PSMD11,OTUD7B,CCDC47,OS9,THRAP3,RBX1,RAB12,TLK2,PCNP,PAPD5,COP1,KCTD17,BCAP31,RNF4,EIF4A2,UHMK1,DYNC1LI1,RP…				GO: Cellular Component	GO:1904949	ATPase complex		0.001069	0.2299	0.01916	0.114	2	25	ATP1A1,ATP2A2
Nisch		GO: Biological Process	GO:0022613	ribonucleoprotein complex biogenesis		4.814e-10	2.786e-06	7.056e-08	6.52e-07	49	468	RPL30,RPL27A,RPL35A,ABCF1,RPL36A,RPS3,RPS5,RPS6,RPS15,RPS15A,RPS17,RPS19,RPS21,RPS23,RPS24,CIRBP,RPL23,RPL7L1,NOCT,SRSF5,SF1,DENR,IPO9,CELF1,DROSHA,CSNK1E,LUC7L2,EIF3H,NCL,FAM103A1,DYNC1H1,NPM1,PAPD5,PUM2,PSIP1,EIF5,RPL13A,RPL3,RPL4,RPL5,RPL6,RPL7A,RPL9,RPL11,RPL12,RPL13,RPL17,RPL18,RPL19				GO: Cellular Component	GO:0036477	somatodendritic compartment		0.001224	0.2632	0.02024	0.1204	7	867	VTI1A,GRIN1,KIF5A,DBN1,KALRN,PABPC1,SUMO1
Spcs1		GO: Biological Process	GO:0006887	exocytosis		4.878e-10	2.823e-06	7.056e-08	6.52e-07	47	438	RAB11B,PFN2,SDC4,SDCBP,MIA3,VSNL1,SCAMP1,APLP2,APP,YWHAZ,RPH3A,ARF1,RAB3GAP1,NAPB,DNAJC5,SNCA,VAMP4,RAB21,RIMS2,ATP2A2,MYH10,SNPH,ATP6AP1,PSAP,MYO5A,VPS4A,CPLX1,NCAM1,VAMP1,PLCB1,SYN1,SYT1,CACNA1A,VMP1,RAP1A,RAP1B,CALM1,CALM2,NSF,PCLO,RAPGEF4,LAMP1,PIP5K1C,NCS1,TMSB4X,UNC13C,CHP1				GO: Cellular Component	GO:0043195	terminal bouton		0.001327	0.2852	0.02037	0.1212	3	112	VTI1A,GRIN1,ITSN1
Mtmr6		GO: Biological Process	GO:0048812	neuron projection morphogenesis		6.47e-10	3.744e-06	8.904e-08	8.228e-07	59	630	MAP2,MAPT,CFL1,MBP,NRN1,CHN1,ADCY1,HNRNPK,KIDINS220,PLXNB1,EZR,EVL,VLDLR,ANK3,APC,GAS7,APP,CPNE5,ARHGDIA,NSMF,PRKCZ,BRSK1,RAB21,RIMS2,FYN,MYH10,GAP43,SPTAN1,SPTBN1,NCAM1,ZEB2,NRP2,BMPR2,PTPRD,SNAP91,PTPRZ1,AFG3L2,SYT1,DLG4,KIF5B,KIF5C,RAC1,KRAS,CACNA1A,KALRN,CAMK2A,CAMK2B,SYNE1,NTRK2,RTN4,GRB2,PIP5K1C,CIT,THY1,EIF4G2,FLOT1,RPL4,DCLK1,MAPK8IP2				GO: Cellular Component	GO:0044295	axonal growth cone		0.00144	0.3096	0.02064	0.1228	2	29	KIF5B,DBN1
Spata13		GO: Biological Process	GO:0043604	amide biosynthetic process		6.556e-10	3.794e-06	8.904e-08	8.228e-07	68	780	RPL30,RPL27A,RPL35A,ABCF1,RPL36A,RPS3,PAIP2,RPS5,RPS6,MRPL30,RPS15,RPS15A,RPS17,RPS19,RPS21,RPS23,RPS24,MTPN,CIRBP,RPL23,RPL7L1,AKT1,QKI,SLC25A23,SPTLC2,ST3GAL2,TNRC6C,APP,PABPC1,DENR,NCOR2,CELF1,DROSHA,MRPL48,EIF5B,GIGYF2,EIF3H,NACA,PAIP2B,DARS,NPM1,CALR,PUM2,EEF1A1,EEF1A2,SLC25A22,EEF1G,TRAP1,EIF1AX,ZNF706,EIF4A2,UHMK1,EIF4G2,EIF5,EIF5A,RPL13A,RPL3,RPL4,RPL5,RPL6,RPL7A,RPL9,RPL11,RPL12,RPL13,RP…				GO: Cellular Component	GO:0098794	postsynapse		0.001661	0.357	0.02231	0.1328	5	449	GRIN1,DBN1,ATP1A1,KALRN,MAP4
Sucla2		GO: Biological Process	GO:1903827	regulation of cellular protein localization		6.617e-10	3.829e-06	8.904e-08	8.228e-07	57	598	RAB11B,U2AF2,HNRNPK,AP2M1,CLTC,AKT1,STX7,HSP90AA1,EZR,DPP10,ANK3,NPEPPS,TMEM59,APC,CCT2,SORBS1,YWHAE,YWHAZ,PPP2CA,NPTN,SIRT2,RGS20,CCT5,CSNK1E,DYNLL2,PRKACA,DYNLL1,CTNNB1,VAMP4,FYN,MXI1,VPS4A,SPTBN1,HSPH1,SRI,B3GAT3,OTUD7B,PTN,BMPR1A,DLG1,OS9,KIF5B,NMT1,PID1,NPM1,KALRN,CAMK4,CAV2,KIF3A,BCAP31,UBL5,UHMK1,NUTF2,CDC42,DCLK1,STX6,CHP1				GO: Cellular Component	GO:0048471	perinuclear region of cytoplasm		0.0025	0.5375	0.03102	0.1845	6	724	TLK2,VTI1A,KIF5A,KIF5B,KALRN,ATP2A2
Oxct1		GO: Biological Process	GO:0060627	regulation of vesicle-mediated transport		9.233e-10	5.342e-06	1.209e-07	1.117e-06	51	508	RAB11B,HMGB1,RABGAP1,PFN2,HNRNPK,ADD1,HSPA8,SDC4,SDCBP,EZR,VSNL1,SAR1A,RPH3A,ARF1,RAB3GAP1,ARRB1,NAPB,SNCA,VAMP4,RAB21,RIMS2,ATP2A2,NDRG4,TBC1D9B,SNPH,ATP6AP1,MYO5A,VPS4A,CPLX1,NCAM1,YIPF5,SNAP91,PLCB1,SYN1,SYT1,DLG4,KIF5B,DNM1,RAC1,CACNA1A,RAP1A,RAP1B,NSF,CALR,SYNE1,PCLO,RAPGEF4,LAMP1,NCS1,KIF3A,FLOT1				GO: Cellular Component	GO:0033017	sarcoplasmic reticulum membrane		0.002597	0.5583	0.03102	0.1845	2	39	ATP2A2,JPH3
Drosha		GO: Biological Process	GO:0099531	presynaptic process involved in chemical synaptic transmission		9.401e-10	5.439e-06	1.209e-07	1.117e-06	27	173	PFN2,MEF2C,HSPA8,RPH3A,CASK,RAB3GAP1,NAPB,DNAJC5,SNCA,BRSK1,RIMS2,ATP2A2,GAD1,SNPH,CPLX1,SNAP91,PTPRN2,SYN1,SYN2,SYT1,CACNA1A,RAP1A,RAP1B,CAMK2A,NTRK2,PCLO,PIP5K1C				GO: Cellular Component	GO:0005875	microtubule associated complex		0.003407	0.7325	0.03856	0.2294	3	156	KIF5A,KIF5B,MAP4
Slc22a17		GO: Biological Process	GO:1901698	response to nitrogen compound		1.051e-09	6.08e-06	1.322e-07	1.221e-06	79	981	HSP90B1,ABAT,PDE4B,PDE1B,MAT2A,CFL1,PENK,RFTN2,ADCY1,MEF2C,HNRNPK,SORT1,GRK2,ATP6V1D,PPP1R1B,AKT1,FKBP1A,EZR,VLDLR,SRSF3,SRSF5,SORBS1,APP,SLC1A2,NCOR2,SIRT2,ATP6V1H,NSMF,DROSHA,ATP6V0E2,PRKACA,PRKAR1A,PRKCZ,CTNNB1,ATP1A2,SNCA,FYN,ATP2A2,GABRA1,GABRB3,GABRG2,ATP6V1C1,AHCYL1,ATP6V1E1,ATP6V0B,ATP6V1G2,ATP6AP1,ATRX,MYO5A,NCAM1,ERBIN,NDUFS4,ITPR2,PTN,GNG12,GLRB,PLCB1,DLG4,TAC1,GNB2,PID1,GOT1,NPM1,GPLD…				GO: Cellular Component	GO:1902495	transmembrane transporter complex		0.003595	0.7729	0.03864	0.2299	4	327	GRIN1,ATP1A1,ATP2A2,SUMO1
Sub1		GO: Biological Process	GO:1901699	cellular response to nitrogen compound		1.695e-09	9.805e-06	2.059e-07	1.902e-06	56	597	HSP90B1,PDE4B,PENK,ADCY1,MEF2C,HNRNPK,GRK2,ATP6V1D,AKT1,EZR,VLDLR,SRSF3,SRSF5,SORBS1,APP,NCOR2,SIRT2,ATP6V1H,NSMF,DROSHA,ATP6V0E2,PRKACA,PRKAR1A,PRKCZ,CTNNB1,SNCA,FYN,GABRA1,GABRB3,GABRG2,ATP6V1C1,AHCYL1,ATP6V1E1,ATP6V0B,ATP6V1G2,ATP6AP1,ATRX,MYO5A,ITPR2,GNG12,PLCB1,GNB2,PID1,GOT1,NPM1,GPLD1,RAP1A,RAP1B,CAMK2A,NTRK2,GRB2,CAV2,GSTP1,RNF4,FLOT1,ATP6V0A2				GO: Cellular Component	GO:1990351	transporter complex		0.003835	0.8246	0.03927	0.2336	4	333	GRIN1,ATP1A1,ATP2A2,SUMO1
Cct5		GO: Biological Process	GO:0019725	cellular homeostasis		1.708e-09	9.882e-06	2.059e-07	1.902e-06	73	885	TPT1,RAB11B,HSP90B1,HMGB1,SLC22A17,HNRNPK,ADD1,SLC12A5,ATP6V1D,TXNDC16,MAP4K4,FKBP1A,SLC25A23,VSNL1,ANK2,GLRX3,APC,APLP2,APP,SLC40A1,ARF1,PPP2CA,NPTN,ATP6V1H,ARRB1,ATP6V0E2,PRKACA,ATP1A1,ATP1A2,SNCA,SLC4A4,ATP2A2,ATP2B1,ATP2B2,GAA,ATP5F1B,ATP6V1C1,ATP6V1E1,ATP6V0B,ATP6V1G2,MYO5A,SRI,DBI,ITPR2,TMX1,NELL2,PTPRN2,DLD,DLG4,TAC1,TESC,KIF5B,CACNA1A,NPM1,GPLD1,RAP1A,CALM1,CALM2,CALR,SLC39A10,TMBIM6,PDIA…				GO: Cellular Component	GO:0005871	kinesin complex		0.005103	1	0.04507	0.2682	2	55	KIF5A,KIF5B
Laptm4b		GO: Biological Process	GO:0048667	cell morphogenesis involved in neuron differentiation		2.977e-09	1.723e-05	3.458e-07	3.195e-06	55	590	MAP2,MAPT,CFL1,MBP,NRN1,CHN1,ADCY1,MEF2C,KIDINS220,PLXNB1,EZR,EVL,VLDLR,ANK3,APC,APP,ARHGDIA,NSMF,BRSK1,RAB21,FYN,ATP2B2,MYH10,GAP43,SPTAN1,SPTBN1,NCAM1,ZEB2,NRP2,BMPR2,PTPRD,SNAP91,PTPRZ1,AFG3L2,DLG4,KIF5B,KIF5C,RAC1,KRAS,CACNA1A,KALRN,CAMK2A,CAMK2B,SYNE1,NTRK2,RTN4,GRB2,PIP5K1C,CIT,THY1,EIF4G2,FLOT1,RPL4,DCLK1,MAPK8IP2				GO: Cellular Component	GO:0030426	growth cone		0.005241	1	0.04507	0.2682	3	182	GRIN1,KIF5B,DBN1
Myo10		GO: Biological Process	GO:0044033	multi-organism metabolic process		2.988e-09	1.729e-05	3.458e-07	3.195e-06	29	207	RPL30,RPL27A,RPL35A,RPL36A,RPS3,RPS5,RPS6,RPS15,RPS15A,RPS17,RPS19,RPS21,RPS23,RPS24,RPL23,USF2,RPL13A,RPL3,RPL4,RPL5,RPL6,RPL7A,RPL9,RPL11,RPL12,RPL13,RPL17,RPL18,RPL19				GO: Cellular Component	GO:0043679	axon terminus		0.005567	1	0.04507	0.2682	3	186	VTI1A,GRIN1,ITSN1
Pabpc1		GO: Biological Process	GO:0034655	nucleobase-containing compound catabolic process		3.21e-09	1.857e-05	3.642e-07	3.365e-06	44	418	RPL30,RPL27A,RPL35A,PDE4B,RPL36A,PDE1B,RPS3,RPS5,RPS6,RPS15,RPS15A,RPS17,HMGB1,RPS19,RPS21,RPS23,RPS24,RPL23,NOCT,VCP,TNRC6C,PABPC1,PPP2CA,GDA,DROSHA,PDE7B,THRAP3,PAPD5,NUDT3,EIF4A2,UHMK1,RPL13A,RPL3,RPL4,RPL5,RPL6,RPL7A,RPL9,RPL11,RPL12,RPL13,RPL17,RPL18,RPL19				GO: Cellular Component	GO:0030027	lamellipodium		0.005567	1	0.04507	0.2682	3	186	KLHL2,DBN1,ITSN1
Ywhaz		GO: Biological Process	GO:0010243	response to organonitrogen compound		3.75e-09	2.169e-05	4.172e-07	3.855e-06	71	866	HSP90B1,ABAT,PDE4B,PDE1B,MAT2A,CFL1,PENK,ADCY1,MEF2C,HNRNPK,SORT1,ATP6V1D,PPP1R1B,AKT1,FKBP1A,EZR,VLDLR,SRSF3,SRSF5,SORBS1,APP,SLC1A2,SIRT2,ATP6V1H,NSMF,ATP6V0E2,PRKACA,PRKAR1A,PRKCZ,CTNNB1,ATP1A2,SNCA,FYN,ATP2A2,GABRA1,GABRB3,GABRG2,ATP6V1C1,AHCYL1,ATP6V1E1,ATP6V0B,ATP6V1G2,ATP6AP1,MYO5A,NCAM1,ERBIN,NDUFS4,ITPR2,PTN,GNG12,GLRB,PLCB1,DLG4,TAC1,GNB2,PID1,GOT1,GPLD1,RAP1A,RAP1B,CALM1,CALM2,KALRN,CA…				GO: Cellular Component	GO:0030427	site of polarized growth		0.00565	1	0.04507	0.2682	3	187	GRIN1,KIF5B,DBN1
Atp6v1c1		GO: Biological Process	GO:0051656	establishment of organelle localization		4.528e-09	2.62e-05	4.943e-07	4.568e-06	45	438	RAB11B,MAP4,MAPT,RPS15,PFN2,EZR,CHMP5,YWHAZ,RPH3A,ARF1,RAB3GAP1,NAPB,DNAJC5,TMED9,PRKCZ,CTNNB1,SNCA,RIMS2,ATP2A2,MYH10,SNPH,ATP6AP1,MYO5A,VPS4A,KIF1B,CPLX1,SYN1,SYT1,DLG1,KIF5B,DNM1,RAB6A,DYNC1H1,CACNA1A,NPM1,RAP1A,RAP1B,NSF,SYNE1,PCLO,LAMP1,PIP5K1C,KIF3A,SAR1B,CDC42				GO: Cellular Component	GO:0014704	intercalated disc		0.00566	1	0.04507	0.2682	2	58	ATP1A1,ATP2A2
Eif3h		GO: Biological Process	GO:0006836	neurotransmitter transport		5.213e-09	3.016e-05	5.586e-07	5.161e-06	29	212	PFN2,MEF2C,HSPA8,RPH3A,CASK,RAB3GAP1,NAPB,DNAJC5,ATP1A2,SNCA,BRSK1,RIMS2,ATP2A2,GAD1,SNPH,CPLX1,SNAP91,PTPRN2,SV2B,SYN1,SYN2,SYT1,CACNA1A,RAP1A,RAP1B,CAMK2A,NTRK2,PCLO,PIP5K1C				GO: Cellular Component	GO:0043025	neuronal cell body		0.006427	1	0.04808	0.2861	5	616	VTI1A,GRIN1,KIF5A,DBN1,KALRN
Ndufb9		GO: Biological Process	GO:0080135	regulation of cellular response to stress		5.546e-09	3.209e-05	5.741e-07	5.305e-06	64	752	TPT1,RPS3,U2AF2,HMGB1,HNRNPK,WAC,ATP6V1D,AKT1,HSBP1,SPOP,DNAJA1,MAP4K4,HSPA8,SDCBP,HSP90AA1,EZR,SFPQ,HACD3,NSD2,SPTLC2,OTUB1,CHORDC1,YWHAE,RAB3GAP1,ATP6V1H,ATP6V0E2,VPS35,WDFY3,SNCA,SNX5,ATP6V1C1,ATP6V1E1,ZMYND11,ATP6V0B,ATP6V1G2,PSAP,HSPH1,ZEB2,BMPR1A,PLCB1,SERINC3,DLG1,OS9,MAP1LC3B,RAB12,KRAS,NPM1,YPEL3,CAMK2A,CAMK2B,RTN4,DNAJB6,DNM1L,SPAG9,TMBIM6,GSTP1,TRAP1,BCAP31,PAFAH1B2,SPRED1,RPA1,CDC42,M…				GO: Cellular Component	GO:0031252	cell leading edge		0.006629	1	0.04808	0.2861	4	389	KLHL2,GRIN1,DBN1,ITSN1
Zhx1		GO: Biological Process	GO:0098662	inorganic cation transmembrane transport		5.556e-09	3.215e-05	5.741e-07	5.305e-06	59	667	TTYH1,PDE4B,ACACA,SLC12A5,UQCRH,FKBP1A,ATP5PD,DPP10,ANK2,ANK3,COX6A1,COX6B1,COX7C,YWHAE,SLC40A1,ARF1,PPP2CA,ATP6V1H,ATP6V0E2,PRKACA,TSPAN13,ATP1A1,ATP1A2,SNCA,SLC4A4,ATP2A2,ATP2B1,ATP2B2,ATP5F1A,ATP5F1B,NOS1AP,ATP5PF,ATP6V1C1,ATP6V1E1,ATP6V0B,ATP6AP1,MYO5A,SRI,DBI,ITPR2,PLCB1,SLC9A7,KCNAB1,DLG1,TESC,KIF5B,WNK2,CACNA1A,CACNB1,CALM1,CALM2,SLC39A10,NCS1,MTMR6,THY1,SLC4A10,ATP6V0A2,JPH3,CHP1				GO: Cellular Component	GO:0044306	neuron projection terminus		0.006708	1	0.04808	0.2861	3	199	VTI1A,GRIN1,ITSN1
Rbx1		GO: Biological Process	GO:0016358	dendrite development		5.688e-09	3.291e-05	5.774e-07	5.335e-06	31	239	MAP2,CFL1,CYTH2,MEF2C,HNRNPK,SLC12A5,KIDINS220,PREX1,VLDLR,APP,ARF1,NSMF,RAB21,FYN,MYO6,PTPRD,PTPRZ1,DLG4,RAC1,CACNA1A,KALRN,CAMK2A,CAMK2B,SYNE1,NTRK2,RAPGEF4,CIT,EIF4G2,PAK2,DCLK1,MAPK8IP2				GO: Cellular Component	GO:0016529	sarcoplasmic reticulum		0.007273	1	0.05044	0.3002	2	66	ATP2A2,JPH3
Syngr1		GO: Biological Process	GO:0030029	actin filament-based process		5.916e-09	3.423e-05	5.902e-07	5.454e-06	60	685	HSP90B1,PDE4B,CFL1,CYTH2,ACTG1,PFN2,FMNL2,MEF2C,ADD1,MTPN,MKL2,PREX1,SDC4,SDCBP,EZR,EVL,SORBS2,ANK2,NEBL,GAS7,SORBS1,ARF1,ARHGDIA,ARRB1,CSRP1,PARVA,PRKAR1A,DYNLL1,PRKCZ,LIMCH1,ATP1A1,ATP1A2,ATP2A2,NOS1AP,MYH10,MYO5A,MYO6,ARHGAP26,SPTAN1,SPTBN1,SRI,JMY,DLG1,GMFB,TAC1,RAC1,KRAS,CALR,CAPZA2,DNAJB6,GRB2,PIP5K1C,CIT,NISCH,LRP1,TMSB4X,EMP2,CDC42,ACAP2,EPB41L2				GO: Cellular Component	GO:0044308	axonal spine		0.007743	1	0.05044	0.3002	1	4	DBN1
Csnk1e		GO: Biological Process	GO:0098660	inorganic ion transmembrane transport		6.149e-09	3.558e-05	6.03e-07	5.572e-06	64	754	TTYH1,PDE4B,ACACA,SLC12A5,UQCRH,FKBP1A,ATP5PD,PCYOX1,DPP10,ANK2,ANK3,COX6A1,COX6B1,COX7C,YWHAE,SLC40A1,ARF1,PPP2CA,ATP6V1H,ATP6V0E2,PRKACA,TSPAN13,ATP1A1,ATP1A2,SNCA,SLC4A4,ATP2A2,ATP2B1,ATP2B2,ATP5F1A,GABRA1,ATP5F1B,NOS1AP,GABRB3,GABRG2,ATP5PF,ATP6V1C1,ATP6V1E1,ATP6V0B,ATP6AP1,MYO5A,SRI,DBI,ITPR2,GLRB,PLCB1,SLC9A7,KCNAB1,DLG1,TESC,KIF5B,WNK2,CACNA1A,CACNB1,CALM1,CALM2,SLC39A10,NCS1,MTMR6,THY1,SL…				GO: Cellular Component	GO:0031933	telomeric heterochromatin		0.007743	1	0.05044	0.3002	1	4	ATRX
Nell2		GO: Biological Process	GO:0016072	rRNA metabolic process		6.266e-09	3.625e-05	6.042e-07	5.583e-06	33	267	RPL30,RPL27A,RPL35A,RPL36A,RPS3,RPS5,RPS6,RPS15,RPS15A,RPS17,RPS19,RPS21,RPS23,RPS24,RPL23,RPL7L1,DROSHA,CSNK1E,NCL,PAPD5,RPL13A,RPL3,RPL4,RPL5,RPL6,RPL7A,RPL9,RPL11,RPL12,RPL13,RPL17,RPL18,RPL19				GO: Cellular Component	GO:0044291	cell-cell contact zone		0.008375	1	0.05223	0.3108	2	71	ATP1A1,ATP2A2
Desi1		GO: Biological Process	GO:0044087	regulation of cellular component biogenesis		8.041e-09	4.653e-05	7.627e-07	7.048e-06	68	829	MAP4,MAPT,RPS3,HMGB1,RABGAP1,PFN2,MEF2C,ADD1,MTPN,LRRTM4,PREX1,HSPA8,SDC4,SDCBP,VCP,HSP90AA1,VDAC3,EZR,EVL,CHMP5,APC,SAR1A,ARF1,MAPRE1,GDA,RAB3GAP1,SIRT2,NAPB,PRKACA,PPP1R16B,PRKCZ,CTNNB1,SNCA,CLSTN3,TBC1D9B,GAP43,MYO10,VPS4A,SPTAN1,SPTBN1,ADGRB2,PSMC6,NCAM1,NCL,JMY,DLG1,GMFB,TAC1,RAC1,RBX1,NPM1,RAP1A,RAP1B,NTRK2,CAPZA2,DNAJB6,STMN2,TPPP,GRB2,DNM1L,KCTD17,RNF4,H3F3B,RPL13A,FLOT1,RPA1,CDC42,CRBN				GO: Cellular Component	GO:0005911	cell-cell junction		0.008502	1	0.05223	0.3108	4	418	KAZN,DBN1,ATP1A1,ATP2A2
Aco2		GO: Biological Process	GO:0007611	learning or memory		9.099e-09	5.265e-05	8.491e-07	7.846e-06	33	271	PDE1B,PAIP2,ADCY1,MEF2C,MEIS2,SLC12A5,ATP8A1,PPP1R1B,VDAC3,VIP,VLDLR,APP,NPTN,PRKCZ,ATP1A2,FYN,NDRG4,NCAM1,DBI,PTN,PTPRZ1,PLCB1,KCNAB1,GMFB,DLG4,TAC1,KRAS,NRGN,KALRN,CAMK4,NTRK2,MAPK8IP2,JPH3				GO: Cellular Component	GO:0016528	sarcoplasm		0.00907	1	0.05417	0.3223	2	74	ATP2A2,JPH3
Pde1b		GO: Biological Process	GO:0017157	regulation of exocytosis		9.901e-09	5.729e-05	9.093e-07	8.402e-06	28	205	PFN2,SDC4,SDCBP,VSNL1,RPH3A,ARF1,RAB3GAP1,NAPB,SNCA,RAB21,RIMS2,ATP2A2,ATP6AP1,MYO5A,VPS4A,CPLX1,NCAM1,PLCB1,SYN1,SYT1,CACNA1A,RAP1A,RAP1B,NSF,PCLO,RAPGEF4,LAMP1,NCS1				GO: Cellular Component	GO:0042641	actomyosin		0.00979	1	0.05689	0.3385	2	77	KLHL2,DBN1
Emp2		GO: Biological Process	GO:0010959	regulation of metal ion transport		1.077e-08	6.229e-05	9.689e-07	8.953e-06	40	374	PDE4B,SELENOK,AKT1,FKBP1A,VIP,DPP10,ANK2,ANK3,HBP1,YWHAE,ARF1,CASK,PPP2CA,PRKACA,TSPAN13,SARAF,CTNNB1,ATP1A1,ATP1A2,SNCA,ATP2B2,NOS1AP,AHCYL1,MYO5A,SRI,DBI,PLCB1,KCNAB1,DLG1,TESC,KIF5B,WNK2,CACNB1,CALM1,CALM2,CAMK2A,CAMK2B,THY1,JPH3,CHP1				Mouse Phenotype	MP:0001468	abnormal temporal memory		9.613e-05	0.1206	0.06223	0.4799	5	187	GRIN1,ATRX,KALRN,ITSN1,JPH3
Mapk8ip2		GO: Biological Process	GO:0023061	signal release		1.089e-08	6.298e-05	9.689e-07	8.953e-06	48	498	RAB11B,ABAT,PFN2,MEF2C,FGFR1,MAP4K4,HSPA8,VIP,VSNL1,SCG5,YWHAZ,RPH3A,CASK,RAB3GAP1,ARRB1,NAPB,VPS35,DNAJC5,SNCA,BRSK1,RIMS2,ATP2A2,ILDR2,GAD1,SNPH,MYO5A,SRI,CPLX1,ITPR2,NELL2,SNAP91,PTPRN2,SYN1,SYN2,SYT1,TAC1,KIF5B,CACNA1A,GPLD1,RAP1A,RAP1B,CAMK2A,NTRK2,PCLO,RAPGEF4,PIP5K1C,OXCT1,ENSA				Mouse Phenotype	MP:0002062	abnormal associative learning		9.917e-05	0.1245	0.06223	0.4799	6	307	GRIN1,DBN1,ATRX,KALRN,ITSN1,JPH3
Yaf2		GO: Biological Process	GO:0032990	cell part morphogenesis		1.119e-08	6.472e-05	9.806e-07	9.062e-06	73	925	MAP2,MAP4,MAPT,CFL1,MBP,RABGAP1,NRN1,CHN1,ADCY1,HNRNPK,KIDINS220,ATP6V1D,C5orf30,PLXNB1,VDAC3,EZR,EVL,VLDLR,ANK3,APC,GAS7,APP,CPNE5,ARHGDIA,NSMF,SSX2IP,PARVA,DYNLL1,PRKCZ,BRSK1,RAB21,RIMS2,FYN,SNX2,MYH10,TBC1D9B,GAP43,SPTAN1,SPTBN1,NCAM1,ZEB2,NRP2,BMPR2,PTPRD,SNAP91,PTPRZ1,AFG3L2,SYT1,DLG4,KIF5B,KIF5C,PID1,RAC1,KRAS,CACNA1A,KALRN,CAMK2A,CAMK2B,SYNE1,NTRK2,RTN4,GRB2,DNM1L,PIP5K1C,CIT,KIF3A,KCTD17,…				Mouse Phenotype	MP:0012317	impaired conditioning behavior		0.0002426	0.3044	0.08111	0.6255	4	122	GRIN1,DBN1,ATRX,ITSN1
Tomm70a		GO: Biological Process	GO:0006364	rRNA processing		1.179e-08	6.819e-05	1.01e-06	9.333e-06	32	260	RPL30,RPL27A,RPL35A,RPL36A,RPS3,RPS5,RPS6,RPS15,RPS15A,RPS17,RPS19,RPS21,RPS23,RPS24,RPL23,RPL7L1,CSNK1E,NCL,PAPD5,RPL13A,RPL3,RPL4,RPL5,RPL6,RPL7A,RPL9,RPL11,RPL12,RPL13,RPL17,RPL18,RPL19				Mouse Phenotype	MP:0011129	decreased secondary ovarian follicle number		0.0002825	0.3545	0.08111	0.6255	2	10	C1GALT1,PDGFRA
Lztr1		GO: Biological Process	GO:0030001	metal ion transport		1.196e-08	6.922e-05	1.01e-06	9.333e-06	69	855	TTYH1,TPT1,RAB11B,PDE4B,SLC12A5,SELENOK,ATP6V1D,CLTC,AKT1,FKBP1A,VIP,DPP10,ANK2,ANK3,HBP1,YWHAE,SLC40A1,ARF1,CASK,PPP2CA,ATP6V1H,ATP6V0E2,PRKACA,TSPAN13,SARAF,CTNNB1,ATP1A1,ATP1A2,SNCA,SLC4A4,FYN,ATP2A2,ATP2B1,ATP2B2,NOS1AP,ATP6V1C1,AHCYL1,ATP6V1E1,ATP6V0B,ATP6V1G2,ATP6AP1,MYO5A,SRI,DBI,NDUFA9,ITPR2,PLCB1,SLC9A7,KCNAB1,DLG1,TESC,KIF5B,NIPA1,WNK2,CACNA1A,CACNB1,CALM1,CALM2,NSF,CAMK2A,CAMK2B,SLC39A…				Mouse Phenotype	MP:0002799	abnormal passive avoidance behavior		0.0003231	0.4055	0.08111	0.6255	3	53	GRIN1,KALRN,JPH3
Dlg1		GO: Biological Process	GO:0048167	regulation of synaptic plasticity		1.204e-08	6.969e-05	1.01e-06	9.333e-06	25	169	MAPT,PAIP2,MEF2C,HNRNPK,ARF1,NPTN,RAB3GAP1,NSMF,PRKCZ,SNCA,ATP2B2,MYO6,NCAM1,DBI,NCDN,PTN,DLG4,KRAS,NRGN,CAMK2A,CAMK2B,NTRK2,SHISA7,SYNGR1,JPH3				Mouse Phenotype	MP:0001473	reduced long term potentiation		0.0005606	0.7035	0.1001	0.7721	4	152	GRIN1,ATRX,KALRN,JPH3
Pak2		GO: Biological Process	GO:0071417	cellular response to organonitrogen compound		1.313e-08	7.595e-05	1.085e-06	1.003e-05	49	517	HSP90B1,PDE4B,PENK,ADCY1,MEF2C,HNRNPK,ATP6V1D,AKT1,EZR,VLDLR,SRSF3,SRSF5,SORBS1,APP,SIRT2,ATP6V1H,NSMF,ATP6V0E2,PRKACA,PRKAR1A,PRKCZ,CTNNB1,SNCA,FYN,GABRA1,GABRB3,GABRG2,ATP6V1C1,AHCYL1,ATP6V1E1,ATP6V0B,ATP6V1G2,ATP6AP1,MYO5A,ITPR2,GNG12,PLCB1,GNB2,PID1,GOT1,GPLD1,RAP1A,RAP1B,CAMK2A,NTRK2,GRB2,CAV2,GSTP1,ATP6V0A2				Mouse Phenotype	MP:0001469	abnormal contextual conditioning behavior		0.0006334	0.7949	0.1001	0.7721	4	157	GRIN1,ATRX,KALRN,ITSN1
Dnm1l		GO: Biological Process	GO:0098655	cation transmembrane transport		1.582e-08	9.151e-05	1.289e-06	1.191e-05	62	738	TTYH1,PDE4B,ACACA,SLC12A5,ATP8A1,UQCRH,FKBP1A,ATP5PD,DPP10,ANK2,ANK3,SLC36A4,COX6A1,COX6B1,COX7C,SLC1A1,YWHAE,SLC40A1,ARF1,PPP2CA,ATP6V1H,ATP6V0E2,PRKACA,TSPAN13,ATP1A1,ATP1A2,SNCA,SLC4A4,ATP2A2,ATP2B1,ATP2B2,ATP5F1A,ATP5F1B,NOS1AP,ATP5PF,ATP6V1C1,ATP6V1E1,ATP6V0B,ATP6AP1,MYO5A,SRI,DBI,ITPR2,PLCB1,SLC9A7,KCNAB1,DLG1,TESC,KIF5B,WNK2,CACNA1A,CACNB1,CALM1,CALM2,SLC39A10,NCS1,MTMR6,THY1,SLC4A10,ATP6V…				Mouse Phenotype	MP:0011003	reduced AMPA-mediated synaptic currents		0.0007462	0.9365	0.1001	0.7721	2	16	GRIN1,KALRN
Fstl1		GO: Biological Process	GO:0032386	regulation of intracellular transport		1.725e-08	9.981e-05	1.367e-06	1.263e-05	58	671	RAB11B,MAPT,U2AF2,PFN2,FKBP1A,HSP90AA1,EZR,ANK2,ANK3,NPEPPS,SAR1A,YWHAE,YWHAZ,ARF1,PPP1CC,PPP2CA,RAB3GAP1,RGS20,NAPB,VPS35,DYNLL2,PRKACA,DYNLL1,ATP1A2,SNCA,VAMP4,RAB21,RIMS2,ATP2A2,NDRG4,MXI1,MYO5A,SRI,DBI,B3GAT3,BMPR1A,YIPF5,MLC1,SYN1,OS9,KIF5B,DNM1,NMT1,RAP1A,RAP1B,CALM1,CALM2,CAMK4,LAMP1,KIF3A,BCAP31,UBL5,THY1,UHMK1,NUTF2,CDC42,JPH3,CHP1				Mouse Phenotype	MP:0011127	abnormal secondary ovarian follicle number		0.0007462	0.9365	0.1001	0.7721	2	16	C1GALT1,PDGFRA
Ap2m1		GO: Biological Process	GO:0007610	behavior		1.725e-08	9.981e-05	1.367e-06	1.263e-05	58	671	ABAT,PDE1B,MAPT,PAIP2,PENK,ETV5,ADCY1,MEF2C,MEIS2,PHF21A,SLC12A5,ATP8A1,NEGR1,PPP1R1B,VDAC3,VIP,VLDLR,APLP2,APP,SLC1A2,NPTN,CSNK1E,UBR3,GIGYF2,PRKCZ,ATP1A2,SNCA,FYN,ATP2B2,NDRG4,GAA,GABRG2,GAD1,MYO5A,MYO6,NCAM1,DBI,PTN,PTPRZ1,GLRB,VPS13A,PLCB1,KCNAB1,GMFB,DLG4,TAC1,DNM1,AGTPBP1,KRAS,CACNA1A,NRGN,KALRN,CAMK4,NTRK2,THRB,SLC4A10,MAPK8IP2,JPH3				Mouse Phenotype	MP:0008540	abnormal cerebral hemisphere morphology		0.0007976	1	0.1001	0.7721	7	632	VTI1A,GRIN1,HUWE1,DBN1,ATRX,KALRN,ITSN1
Eif4a2		GO: Biological Process	GO:0045664	regulation of neuron differentiation		1.818e-08	0.0001052	1.422e-06	1.314e-05	57	655	MAP2,MAPT,CFL1,CYTH2,MBP,ETV5,CHN1,MEF2C,HNRNPK,KIDINS220,NEGR1,AKT1,FGFR1,QKI,MAP4K4,PREX1,PLXNB1,VLDLR,APP,CPNE5,ARF1,ARHGDIA,NPTN,NSMF,RAB21,RIMS2,FYN,NDRG4,RAP1GAP2,ZEB2,PTN,BMPR2,PTPRD,PTPRZ1,SYT1,ITM2C,RAC1,CACNA1A,ACSL6,TCF4,RAP1A,KALRN,CALR,CAMK2B,SYNE1,NTRK2,RTN4,RAPGEF4,STMN2,SPAG9,CIT,NCS1,EEF1A1,THY1,EIF4G2,LRP1,RPL4				Mouse Phenotype	MP:0002084	abnormal developmental patterning		0.001065	1	0.117	0.9024	6	477	KIF5B,HUWE1,SYF2,ATRX,PDGFRA,MAP4K4
Atp5j		GO: Biological Process	GO:0042254	ribosome biogenesis		1.876e-08	0.0001085	1.447e-06	1.337e-05	36	322	RPL30,RPL27A,RPL35A,ABCF1,RPL36A,RPS3,RPS5,RPS6,RPS15,RPS15A,RPS17,RPS19,RPS21,RPS23,RPS24,RPL23,RPL7L1,IPO9,DROSHA,CSNK1E,NCL,NPM1,PAPD5,RPL13A,RPL3,RPL4,RPL5,RPL6,RPL7A,RPL9,RPL11,RPL12,RPL13,RPL17,RPL18,RPL19				Mouse Phenotype	MP:0002063	abnormal learning/memory/conditioning		0.001297	1	0.117	0.9024	7	686	GRIN1,DBN1,ATP1A1,ATRX,KALRN,ITSN1,JPH3
App		GO: Biological Process	GO:0048858	cell projection morphogenesis		2.192e-08	0.0001268	1.669e-06	1.542e-05	71	904	MAP2,MAP4,MAPT,CFL1,MBP,RABGAP1,NRN1,CHN1,ADCY1,HNRNPK,KIDINS220,ATP6V1D,C5orf30,PLXNB1,VDAC3,EZR,EVL,VLDLR,ANK3,APC,GAS7,APP,CPNE5,ARHGDIA,NSMF,SSX2IP,PARVA,DYNLL1,PRKCZ,BRSK1,RAB21,RIMS2,FYN,SNX2,MYH10,TBC1D9B,GAP43,SPTAN1,SPTBN1,NCAM1,ZEB2,NRP2,BMPR2,PTPRD,SNAP91,PTPRZ1,AFG3L2,SYT1,DLG4,KIF5B,KIF5C,RAC1,KRAS,CACNA1A,KALRN,CAMK2A,CAMK2B,SYNE1,NTRK2,RTN4,GRB2,PIP5K1C,CIT,KIF3A,KCTD17,THY1,EIF4G2…				Mouse Phenotype	MP:0014114	abnormal cognition		0.001308	1	0.117	0.9024	7	687	GRIN1,DBN1,ATP1A1,ATRX,KALRN,ITSN1,JPH3
Kansl2		GO: Biological Process	GO:0044270	cellular nitrogen compound catabolic process		2.311e-08	0.0001337	1.736e-06	1.604e-05	45	462	RPL30,RPL27A,RPL35A,PDE4B,RPL36A,PDE1B,ACADL,RPS3,RPS5,RPS6,RPS15,RPS15A,RPS17,HMGB1,RPS19,RPS21,RPS23,RPS24,RPL23,NOCT,VCP,TNRC6C,PABPC1,PPP2CA,GDA,DROSHA,PDE7B,THRAP3,PAPD5,NUDT3,EIF4A2,UHMK1,RPL13A,RPL3,RPL4,RPL5,RPL6,RPL7A,RPL9,RPL11,RPL12,RPL13,RPL17,RPL18,RPL19				Mouse Phenotype	MP:0001462	abnormal avoidance learning behavior		0.001335	1	0.117	0.9024	3	86	GRIN1,KALRN,JPH3
Tuba1b		GO: Biological Process	GO:0043254	regulation of protein complex assembly		2.375e-08	0.0001374	1.762e-06	1.628e-05	41	400	MAPT,RPS3,HMGB1,PFN2,ADD1,MTPN,PREX1,HSPA8,VCP,HSP90AA1,EVL,CHMP5,APC,SAR1A,ARF1,MAPRE1,GDA,RAB3GAP1,SIRT2,NAPB,PRKCZ,CTNNB1,SNCA,SPTAN1,SPTBN1,PSMC6,NCAM1,JMY,DLG1,GMFB,RAC1,RBX1,CAPZA2,STMN2,TPPP,GRB2,DNM1L,RNF4,RPA1,CDC42,CRBN				Mouse Phenotype	MP:0005418	abnormal circulating hormone level		0.001398	1	0.117	0.9024	8	908	VTI1A,C1GALT1,KIF5B,HUWE1,ATP1A1,PDGFRA,SEC61A1,ATP2A2
Tmbim6		GO: Biological Process	GO:0046700	heterocycle catabolic process		2.63e-08	0.0001522	1.926e-06	1.78e-05	45	464	RPL30,RPL27A,RPL35A,PDE4B,RPL36A,PDE1B,RPS3,RPS5,RPS6,RPS15,RPS15A,RPS17,HMGB1,RPS19,RPS21,RPS23,RPS24,RPL23,NOCT,VCP,TNRC6C,PABPC1,PPP2CA,GDA,DROSHA,PDE7B,THRAP3,GOT2,PAPD5,NUDT3,EIF4A2,UHMK1,RPL13A,RPL3,RPL4,RPL5,RPL6,RPL7A,RPL9,RPL11,RPL12,RPL13,RPL17,RPL18,RPL19				Mouse Phenotype	MP:0000807	abnormal hippocampus morphology		0.001961	1	0.1538	1	5	361	HUWE1,DBN1,ATRX,KALRN,ITSN1
Pcdhga8		GO: Biological Process	GO:0015991	ATP hydrolysis coupled proton transport		2.896e-08	0.0001676	2.069e-06	1.912e-05	11	33	ATP6V1H,ATP6V0E2,ATP1A1,ATP1A2,ATP5F1A,ATP5F1B,ATP6V1C1,ATP6V1E1,ATP6V0B,ATP6AP1,ATP6V0A2				Mouse Phenotype	MP:0000801	abnormal temporal lobe morphology		0.002109	1	0.1557	1	5	367	HUWE1,DBN1,ATRX,KALRN,ITSN1
Calcoco1		GO: Biological Process	GO:0015988	energy coupled proton transmembrane transport, against electrochemical gradient		2.896e-08	0.0001676	2.069e-06	1.912e-05	11	33	ATP6V1H,ATP6V0E2,ATP1A1,ATP1A2,ATP5F1A,ATP5F1B,ATP6V1C1,ATP6V1E1,ATP6V0B,ATP6AP1,ATP6V0A2				Mouse Phenotype	MP:0002207	abnormal long term potentiation		0.002646	1	0.1845	1	4	231	GRIN1,ATRX,KALRN,JPH3
Noct		GO: Biological Process	GO:0015980	energy derivation by oxidation of organic compounds		3.435e-08	0.0001987	2.424e-06	2.24e-05	33	286	PDHB,ACO2,HMGB1,AKT1,UQCRH,SLC25A23,SDHA,VCP,COX6A1,COX6B1,COX7C,SORBS1,PPP1CC,PRKACA,SNCA,GAA,NDUFA8,NDUFA9,SUCLA2,NDUFB8,NDUFB9,NDUFS4,NDUFV2,DLD,PYGB,DLST,ALDH5A1,PID1,CALM1,CALM2,NDUFA13,TRAP1,CYCS				Mouse Phenotype	MP:0002885	abnormal AMPA-mediated synaptic currents		0.003008	1	0.1987	1	2	32	GRIN1,KALRN
Denr		GO: Biological Process	GO:1990089	response to nerve growth factor		3.544e-08	0.0002051	2.471e-06	2.283e-05	12	41	RPS3,SORT1,KIDINS220,AKT1,APC,APP,PTN,TAC1,RAP1A,NTRK2,STMN2,ACAP2				Mouse Phenotype	MP:0004000	impaired passive avoidance behavior		0.003197	1	0.1999	1	2	33	GRIN1,KALRN
Scg5		GO: Biological Process	GO:1902600	proton transmembrane transport		4.022e-08	0.0002327	2.77e-06	2.56e-05	19	108	UQCRH,ATP5PD,COX6A1,COX6B1,COX7C,ATP6V1H,ATP6V0E2,ATP1A1,ATP1A2,ATP5F1A,ATP5F1B,ATP5PF,ATP6V1C1,ATP6V1E1,ATP6V0B,ATP6AP1,SLC9A7,SLC4A10,ATP6V0A2				Mouse Phenotype	MP:0004166	abnormal limbic system morphology		0.003346	1	0.1999	1	5	408	HUWE1,DBN1,ATRX,KALRN,ITSN1
Rab12		GO: Biological Process	GO:0019439	aromatic compound catabolic process		4.958e-08	0.0002869	3.375e-06	3.119e-05	45	474	RPL30,RPL27A,RPL35A,PDE4B,RPL36A,PDE1B,RPS3,RPS5,RPS6,RPS15,RPS15A,RPS17,HMGB1,RPS19,RPS21,RPS23,RPS24,RPL23,NOCT,VCP,ASRGL1,TNRC6C,PABPC1,PPP2CA,GDA,DROSHA,PDE7B,THRAP3,PAPD5,NUDT3,EIF4A2,UHMK1,RPL13A,RPL3,RPL4,RPL5,RPL6,RPL7A,RPL9,RPL11,RPL12,RPL13,RPL17,RPL18,RPL19				Mouse Phenotype	MP:0012312	impaired avoidance learning behavior		0.003796	1	0.2127	1	2	36	GRIN1,KALRN
Cpne5		GO: Biological Process	GO:0022604	regulation of cell morphogenesis		5.846e-08	0.0003382	3.933e-06	3.634e-05	53	609	MAP2,MAP4,MAPT,CFL1,MBP,RABGAP1,CHN1,FMNL2,HNRNPK,CFDP1,PREX1,SDCBP,PLXNB1,VDAC3,EZR,GAS7,CPNE5,PPP2CA,ARHGDIA,NSMF,CSNK1E,PARVA,CTNNB1,RAB21,RIMS2,FYN,MYH10,TBC1D9B,MYO10,ZEB2,PTN,BMPR2,PTPRD,CDC42SE2,PTPRZ1,SYT1,DLG1,RAC1,CACNA1A,KALRN,CALR,CAMK2B,SYNE1,NTRK2,RTN4,CIT,KIF3A,KCTD17,THY1,EIF4G2,CDC42,RPL4,EPB41L2				Mouse Phenotype	MP:0009363	abnormal secondary ovarian follicle morphology		0.004007	1	0.2127	1	2	37	C1GALT1,PDGFRA
Glo1		GO: Biological Process	GO:0051640	organelle localization		6.155e-08	0.0003561	4.094e-06	3.783e-05	47	510	RAB11B,MAP4,MAPT,RPS15,PFN2,STX7,EZR,ATCAY,CHMP5,YWHAZ,RPH3A,ARF1,RAB3GAP1,NAPB,DNAJC5,TMED9,PRKCZ,CTNNB1,SNCA,RIMS2,ATP2A2,MYH10,SNPH,ATP6AP1,MYO5A,VPS4A,KIF1B,CPLX1,SYN1,SYT1,DLG1,KIF5B,DNM1,RAB6A,DYNC1H1,CACNA1A,NPM1,RAP1A,RAP1B,NSF,SYNE1,PCLO,LAMP1,PIP5K1C,KIF3A,SAR1B,CDC42				Mouse Phenotype	MP:0000787	abnormal telencephalon morphology		0.004269	1	0.2127	1	7	844	VTI1A,GRIN1,HUWE1,DBN1,ATRX,KALRN,ITSN1
Srsf7		GO: Biological Process	GO:0009167	purine ribonucleoside monophosphate metabolic process		6.377e-08	0.000369	4.193e-06	3.875e-05	32	279	AK4,UQCRH,ALDOC,ATP5PD,SLC25A23,HSPA8,VCP,COX6A1,COX6B1,COX7C,CASK,ATP1A2,SNCA,ATP5F1A,ATP5F1B,ATP5PF,CHCHD10,NDUFA8,NDUFA9,NDUFB8,NDUFB9,NDUFS4,NDUFV2,DLD,DLG1,DLG4,PID1,DNM1L,NDUFA13,CYCS,ENO1,ATP6V0A2				Mouse Phenotype	MP:0005632	decreased circulating aspartate transaminase level		0.004671	1	0.2127	1	2	40	KAZN,DBN1
Ndufv2		GO: Biological Process	GO:0051345	positive regulation of hydrolase activity		6.491e-08	0.0003756	4.22e-06	3.9e-05	71	929	RPS3,CYTH2,HMGB1,RABGAP1,PFN2,CHN1,MEF2C,AKT1,FGFR1,CX3CL1,PREX1,PLXNB1,VCP,HACD3,APP,CYFIP2,ARHGAP5,PPP2CA,ARHGDIA,RNF7,ARL1,RAB3GAP1,ARRB1,RGS20,PRKCZ,SNCA,FYN,TOR1AIP1,CHTOP,ARHGAP42,DNAJB11,ARHGAP32,GAPVD1,TBC1D9B,PSD,ARHGAP26,SPTAN1,SPTBN1,RAP1GAP2,NCAM1,GDI2,ARHGEF9,PLCB1,DLG4,RAB6A,GPLD1,RALGDS,RAP1A,CALM1,CALM2,KALRN,CAMK2A,CAMK2B,RAPGEF4,DNAJB6,PSD3,GRB2,RASGEF1A,CAV2,SLC39A10,RGS4,NDUFA…				Mouse Phenotype	MP:0009142	decreased prepulse inhibition		0.005121	1	0.2127	1	3	138	GRIN1,KALRN,ATP2A2
Abca3		GO: Biological Process	GO:0055082	cellular chemical homeostasis		6.803e-08	0.0003936	4.373e-06	4.041e-05	62	768	TPT1,RAB11B,HSP90B1,HMGB1,SLC22A17,HNRNPK,SLC12A5,ATP6V1D,MAP4K4,FKBP1A,SLC25A23,VSNL1,ANK2,APLP2,APP,SLC40A1,ARF1,PPP2CA,NPTN,ATP6V1H,ARRB1,ATP6V0E2,PRKACA,ATP1A1,ATP1A2,SNCA,SLC4A4,ATP2A2,ATP2B1,ATP2B2,ATP5F1B,ATP6V1C1,ATP6V1E1,ATP6V0B,ATP6V1G2,MYO5A,SRI,DBI,ITPR2,PTPRN2,DLG4,TAC1,TESC,KIF5B,CACNA1A,GPLD1,RAP1A,CALM1,CALM2,CALR,SLC39A10,TMBIM6,KCTD17,RMDN3,BCAP31,OXCT1,THY1,EIF5A,SLC4A10,ATP6V0…				Mouse Phenotype	MP:0001447	abnormal nest building behavior		0.00514	1	0.2127	1	2	42	GRIN1,KALRN
Epas1		GO: Biological Process	GO:0009126	purine nucleoside monophosphate metabolic process		6.936e-08	0.0004013	4.41e-06	4.075e-05	32	280	AK4,UQCRH,ALDOC,ATP5PD,SLC25A23,HSPA8,VCP,COX6A1,COX6B1,COX7C,CASK,ATP1A2,SNCA,ATP5F1A,ATP5F1B,ATP5PF,CHCHD10,NDUFA8,NDUFA9,NDUFB8,NDUFB9,NDUFS4,NDUFV2,DLD,DLG1,DLG4,PID1,DNM1L,NDUFA13,CYCS,ENO1,ATP6V0A2				Mouse Phenotype	MP:0001559	hyperglycemia		0.005225	1	0.2127	1	3	139	KIF5B,HUWE1,SEC61A1
Nudt3		GO: Biological Process	GO:0033572	transferrin transport		8.069e-08	0.0004669	5.075e-06	4.689e-05	11	36	RAB11B,ATP6V1D,CLTC,ATP6V1H,ATP6V0E2,ATP6V1C1,ATP6V1E1,ATP6V0B,ATP6V1G2,ATP6AP1,ATP6V0A2				Mouse Phenotype	MP:0002206	abnormal CNS synaptic transmission		0.005511	1	0.2127	1	6	660	GRIN1,KIF5A,ATRX,KALRN,ATP2A2,JPH3
Wac		GO: Biological Process	GO:0007420	brain development		8.478e-08	0.0004905	5.265e-06	4.865e-05	61	755	ABAT,MAPT,MBP,HNRNPK,MTPN,MKL2,AK4,FGFR1,VLDLR,COX6B1,APLP2,APP,SLC1A2,YWHAE,RPH3A,NCOR2,RNF7,RAB3GAP1,SIRT2,CHD5,DYNLL1,CTNNB1,FYN,ATP2B1,ATP2B2,NDRG4,ATP5PF,MYH10,SNPH,ATRX,NCAM1,DBI,ZEB2,NDUFS4,NRP2,PTN,BMPR1A,BMPR2,GNG12,PTPRZ1,PLCB1,KCNAB1,SYT1,RAC1,AGTPBP1,KRAS,CACNA1A,CALM1,NRGN,CALM2,NTRK2,RTN4,KIF3A,OXCT1,SUDS3,PAFAH1B2,SLC4A10,LRP1,H3F3B,CDC42,DCLK1				Mouse Phenotype	MP:0008546	abnormal vesicle-mediated transport		0.005882	1	0.2127	1	2	45	KIF5A,KIF5B
Brd2		GO: Biological Process	GO:0044764	multi-organism cellular process		8.586e-08	0.0004968	5.265e-06	4.865e-05	62	773	RPL30,RPL27A,RPL35A,RPL36A,RPS3,CFL1,RPS5,RPS6,RPS15,RPS15A,RTN3,RPS17,RPS19,RPS21,RPS23,RPS24,HNRNPK,RPL23,GRK2,UBE2I,USF2,HSPA8,VCP,HACD3,CHMP5,PABPC1,YWHAE,ATP6V1H,ANKRD17,DYNLL1,FYN,ZMYND11,VPS4A,NACA,NCAM1,DLG1,RAB6A,DYNC1I2,RBX1,NPM1,GRB2,PUM2,LAMP1,CAV2,PSIP1,EIF4A2,TSPAN7,PAK2,DYNC1LI1,RPL13A,RPL3,RPL4,RPL5,RPL6,RPL7A,RPL9,RPL11,RPL12,RPL13,RPL17,RPL18,RPL19				Mouse Phenotype	MP:0001900	impaired synaptic plasticity		0.005882	1	0.2127	1	2	45	GRIN1,DBN1
Atp6v1g2		GO: Biological Process	GO:1904375	regulation of protein localization to cell periphery		8.736e-08	0.0005054	5.265e-06	4.865e-05	15	71	AP2M1,CLTC,AKT1,STX7,EZR,DPP10,TMEM59,SORBS1,VAMP4,VPS4A,SPTBN1,DLG1,KIF5B,PID1,KALRN				Mouse Phenotype	MP:0008797	facial cleft		0.005882	1	0.2127	1	2	45	PDGFRA,SUMO1
Mal2		GO: Biological Process	GO:1903076	regulation of protein localization to plasma membrane		8.736e-08	0.0005054	5.265e-06	4.865e-05	15	71	AP2M1,CLTC,AKT1,STX7,EZR,DPP10,TMEM59,SORBS1,VAMP4,VPS4A,SPTBN1,DLG1,KIF5B,PID1,KALRN				Mouse Phenotype	MP:0011084	lethality at weaning, incomplete penetrance		0.005882	1	0.2127	1	2	45	KIF5A,JPH3
Yipf5		GO: Biological Process	GO:0032412	regulation of ion transmembrane transporter activity		1.017e-07	0.0005884	5.988e-06	5.533e-05	26	201	PDE4B,MEF2C,FKBP1A,ANK2,ANK3,YWHAE,PPP2CA,PRKACA,ATP1A2,NOS1AP,AHCYL1,MYO5A,SRI,PLCB1,KCNAB1,DLG4,TESC,KIF5B,WNK2,CACNB1,CALM1,CALM2,GRK6,MAPK8IP2,JPH3,CHP1				Mouse Phenotype	MP:0001405	impaired coordination		0.005901	1	0.2127	1	5	466	GRIN1,KIF5A,KALRN,ITSN1,JPH3
Ppp2r2b		GO: Biological Process	GO:0016032	viral process		1.022e-07	0.0005912	5.988e-06	5.533e-05	61	759	RPL30,RPL27A,RPL35A,RPL36A,RPS3,CFL1,RPS5,RPS6,RPS15,RPS15A,RTN3,RPS17,RPS19,RPS21,RPS23,RPS24,HNRNPK,RPL23,GRK2,UBE2I,USF2,HSPA8,VCP,HACD3,CHMP5,PABPC1,YWHAE,ATP6V1H,ANKRD17,DYNLL1,FYN,ZMYND11,VPS4A,NACA,NCAM1,DLG1,RAB6A,DYNC1I2,RBX1,NPM1,GRB2,LAMP1,CAV2,PSIP1,EIF4A2,TSPAN7,PAK2,DYNC1LI1,RPL13A,RPL3,RPL4,RPL5,RPL6,RPL7A,RPL9,RPL11,RPL12,RPL13,RPL17,RPL18,RPL19				Mouse Phenotype	MP:0004811	abnormal neuron physiology		0.005931	1	0.2127	1	6	670	VTI1A,GRIN1,KIF5A,HUWE1,KALRN,ITSN1
Sec11c		GO: Biological Process	GO:0046034	ATP metabolic process		1.025e-07	0.0005928	5.988e-06	5.533e-05	29	242	AK4,UQCRH,ALDOC,ATP5PD,SLC25A23,HSPA8,VCP,COX6A1,COX6B1,COX7C,ATP1A2,SNCA,ATP5F1A,ATP5F1B,ATP5PF,CHCHD10,NDUFA8,NDUFA9,NDUFB8,NDUFB9,NDUFS4,NDUFV2,DLD,PID1,DNM1L,NDUFA13,CYCS,ENO1,ATP6V0A2				Mouse Phenotype	MP:0002164	abnormal gland physiology		0.006329	1	0.2182	1	6	679	C1GALT1,KIF5B,SKIL,KALRN,SEC61A1,ITSN1
Afg3l2		GO: Biological Process	GO:0090662	ATP hydrolysis coupled transmembrane transport		1.108e-07	0.0006409	6.409e-06	5.922e-05	11	37	ATP6V1H,ATP6V0E2,ATP1A1,ATP1A2,ATP5F1A,ATP5F1B,ATP6V1C1,ATP6V1E1,ATP6V0B,ATP6AP1,ATP6V0A2				Mouse Phenotype	MP:0005217	abnormal pancreatic beta cell morphology		0.006576	1	0.2182	1	3	151	KIF5B,HUWE1,SEC61A1
Camk2a		GO: Biological Process	GO:0046128	purine ribonucleoside metabolic process		1.155e-07	0.0006684	6.618e-06	6.115e-05	37	361	GPHN,ACACA,MAT2A,AK4,UQCRH,ALDOC,SULT4A1,ATP5PD,SLC25A23,HSPA8,VCP,COX6A1,COX6B1,COX7C,CASK,ATP1A2,SNCA,ATP5F1A,ATP5F1B,ATP5PF,AHCYL1,CHCHD10,NDUFA8,NDUFA9,NDUFB8,NDUFB9,NDUFS4,NDUFV2,DLD,DLG1,DLG4,PID1,DNM1L,NDUFA13,CYCS,ENO1,ATP6V0A2				Mouse Phenotype	MP:0003460	decreased fear-related response		0.006671	1	0.2182	1	2	48	GRIN1,KALRN
Psat1		GO: Biological Process	GO:0050803	regulation of synapse structure or activity		1.182e-07	0.000684	6.706e-06	6.197e-05	31	272	MAPT,PAIP2,ETV5,MEF2C,HNRNPK,LRRTM4,APP,ARF1,NPTN,RAB3GAP1,NSMF,PRKCZ,SNCA,ATP2B2,CLSTN3,MYO6,ADGRB2,NCAM1,DBI,NCDN,PTN,DLG4,KRAS,NRGN,CAMK2A,CAMK2B,NTRK2,SHISA7,SYNGR1,CDC42,JPH3				Mouse Phenotype	MP:0001901	absence of NMDA-mediated synaptic currents		0.007707	1	0.2182	1	1	3	GRIN1
Asrgl1		GO: Biological Process	GO:0050890	cognition		1.369e-07	0.0007919	7.688e-06	7.104e-05	33	303	PDE1B,PAIP2,ADCY1,MEF2C,MEIS2,SLC12A5,ATP8A1,PPP1R1B,VDAC3,VIP,VLDLR,APP,NPTN,PRKCZ,ATP1A2,FYN,NDRG4,NCAM1,DBI,PTN,PTPRZ1,PLCB1,KCNAB1,GMFB,DLG4,TAC1,KRAS,NRGN,KALRN,CAMK4,NTRK2,MAPK8IP2,JPH3				Mouse Phenotype	MP:0020548	decreased optic chiasm size		0.007707	1	0.2182	1	1	3	VTI1A
Fads2		GO: Biological Process	GO:0060322	head development		1.423e-07	0.0008231	7.781e-06	7.19e-05	63	802	ABAT,MAPT,MBP,HNRNPK,MTPN,MKL2,AK4,FGFR1,VLDLR,COX6B1,APLP2,APP,SLC1A2,YWHAE,RPH3A,NCOR2,RNF7,RAB3GAP1,SIRT2,CHD5,DYNLL1,CTNNB1,FYN,ATP2B1,ATP2B2,NDRG4,ATP5PF,MYH10,SNPH,ATRX,NCAM1,DBI,ZEB2,NDUFS4,NRP2,PTN,BMPR1A,BMPR2,GNG12,PTPRZ1,PLCB1,KCNAB1,SYT1,RAC1,AGTPBP1,KRAS,CACNA1A,CALM1,NRGN,CALM2,NTRK2,RTN4,KIF3A,OXCT1,SUDS3,ATP6AP2,PAFAH1B2,SLC4A10,LRP1,PLEKHA1,H3F3B,CDC42,DCLK1				Mouse Phenotype	MP:0011124	increased primary ovarian follicle number		0.007707	1	0.2182	1	1	3	C1GALT1
Tmem132a		GO: Biological Process	GO:0042278	purine nucleoside metabolic process		1.426e-07	0.0008249	7.781e-06	7.19e-05	37	364	GPHN,ACACA,MAT2A,AK4,UQCRH,ALDOC,SULT4A1,ATP5PD,SLC25A23,HSPA8,VCP,COX6A1,COX6B1,COX7C,CASK,ATP1A2,SNCA,ATP5F1A,ATP5F1B,ATP5PF,AHCYL1,CHCHD10,NDUFA8,NDUFA9,NDUFB8,NDUFB9,NDUFS4,NDUFV2,DLD,DLG1,DLG4,PID1,DNM1L,NDUFA13,CYCS,ENO1,ATP6V0A2				Mouse Phenotype	MP:0001448	abnormal huddling behavior		0.007707	1	0.2182	1	1	3	GRIN1
Rtn3		GO: Biological Process	GO:0045333	cellular respiration		1.432e-07	0.0008285	7.781e-06	7.19e-05	24	178	PDHB,ACO2,UQCRH,SLC25A23,SDHA,VCP,COX6A1,COX6B1,COX7C,PRKACA,SNCA,NDUFA8,NDUFA9,SUCLA2,NDUFB8,NDUFB9,NDUFS4,NDUFV2,DLD,DLST,ALDH5A1,NDUFA13,TRAP1,CYCS				Mouse Phenotype	MP:0001909	reduced NMDA receptor mediated synaptic activity in barrel cortex		0.007707	1	0.2182	1	1	3	GRIN1
Otub1		GO: Biological Process	GO:0030003	cellular cation homeostasis		1.439e-07	0.0008326	7.781e-06	7.19e-05	51	592	TPT1,HSP90B1,HMGB1,SLC22A17,SLC12A5,ATP6V1D,FKBP1A,SLC25A23,ANK2,APLP2,APP,SLC40A1,ARF1,NPTN,ATP6V1H,ATP6V0E2,PRKACA,ATP1A1,ATP1A2,SNCA,SLC4A4,ATP2A2,ATP2B1,ATP2B2,ATP5F1B,ATP6V1C1,ATP6V1E1,ATP6V0B,ATP6V1G2,MYO5A,SRI,DBI,ITPR2,DLG4,TAC1,TESC,CACNA1A,CALM1,CALM2,CALR,SLC39A10,TMBIM6,KCTD17,RMDN3,BCAP31,THY1,EIF5A,SLC4A10,ATP6V0A2,JPH3,CHP1				Mouse Phenotype	MP:0003492	abnormal involuntary movement		0.008048	1	0.2182	1	7	947	VTI1A,GRIN1,KIF5A,PDGFRA,KALRN,ATP2A2,JPH3
Adrbk1		GO: Biological Process	GO:1990090	cellular response to nerve growth factor stimulus		1.504e-07	0.00087	7.99e-06	7.383e-05	11	38	RPS3,SORT1,KIDINS220,AKT1,APC,APP,TAC1,RAP1A,NTRK2,STMN2,ACAP2				Mouse Phenotype	MP:0001697	abnormal embryo size		0.008174	1	0.2182	1	6	716	KIF5B,HUWE1,DBN1,ATRX,PDGFRA,ATP2A2
Drap1		GO: Biological Process	GO:0050806	positive regulation of synaptic transmission		1.505e-07	0.0008709	7.99e-06	7.383e-05	22	153	ABAT,PAIP2,HNRNPK,NPTN,RAB3GAP1,PRKCZ,SNCA,RIMS2,CLSTN3,DBI,PTN,SYT1,DLG4,TAC1,KIF5B,DNM1,NRGN,CAMK2B,NTRK2,NCS1,PEBP1,FLOT1				Mouse Phenotype	MP:0002727	decreased circulating insulin level		0.008418	1	0.2182	1	4	320	VTI1A,KIF5B,HUWE1,SEC61A1
Vldlr		GO: Biological Process	GO:0006396	RNA processing		1.541e-07	0.0008917	8.106e-06	7.49e-05	69	913	RPL30,RPL27A,RPL35A,RPL36A,RPS3,RPS5,RBM10,RPS6,RPS15,RPS15A,U2AF2,RPS17,RPS19,RPS21,RPS23,RPS24,HNRNPK,RPL23,RPL7L1,ZRANB2,DDX54,NOCT,QKI,HSPA8,SFPQ,SRSF3,SRSF5,SRSF7,TNRC6C,SYF2,APP,PABPC1,SF1,PPP2CA,NCOR2,CELF1,DROSHA,CSNK1E,LUC7L2,PRKACA,FUS,CHTOP,AHCYL1,NCL,DHX9,FAM103A1,PLCB1,THRAP3,NPM1,PAPD5,AGGF1,TMBIM6,UBL5,PSIP1,CELF3,UHMK1,RPL13A,RPL3,RPL4,RPL5,RPL6,RPL7A,RPL9,RPL11,RPL12,RPL13,RPL17,…				Mouse Phenotype	MP:0003339	decreased pancreatic beta cell number		0.008994	1	0.2182	1	2	56	HUWE1,SEC61A1
Slc1a1		GO: Biological Process	GO:1901361	organic cyclic compound catabolic process		1.602e-07	0.0009272	8.353e-06	7.719e-05	46	510	RPL30,RPL27A,RPL35A,PDE4B,RPL36A,PDE1B,RPS3,RPS5,RPS6,RPS15,RPS15A,RPS17,HMGB1,RPS19,RPS21,RPS23,RPS24,RPL23,NOCT,VCP,ASRGL1,TNRC6C,PABPC1,PPP2CA,GDA,DROSHA,PDE7B,THRAP3,GOT2,PAPD5,NUDT3,EIF4A2,UHMK1,RPL13A,RPL3,RPL4,RPL5,RPL6,RPL7A,RPL9,RPL11,RPL12,RPL13,RPL17,RPL18,RPL19				Mouse Phenotype	MP:0002088	abnormal embryonic growth/weight/body size		0.009313	1	0.2182	1	7	973	KIF5B,HUWE1,DBN1,ATRX,PDGFRA,MAP4K4,ATP2A2
Sf1		GO: Biological Process	GO:0022898	regulation of transmembrane transporter activity		1.669e-07	0.0009658	8.624e-06	7.969e-05	26	206	PDE4B,MEF2C,FKBP1A,ANK2,ANK3,YWHAE,PPP2CA,PRKACA,ATP1A2,NOS1AP,AHCYL1,MYO5A,SRI,PLCB1,KCNAB1,DLG4,TESC,KIF5B,WNK2,CACNB1,CALM1,CALM2,GRK6,MAPK8IP2,JPH3,CHP1				Pathway	83050	Calcium signaling pathway	BioSystems: KEGG	0.007695	1	0.1145	0.7468	3	182	GRIN1,PDGFRA,ATP2A2
Vti1a		GO: Biological Process	GO:0009161	ribonucleoside monophosphate metabolic process		1.697e-07	0.0009819	8.689e-06	8.029e-05	32	291	AK4,UQCRH,ALDOC,ATP5PD,SLC25A23,HSPA8,VCP,COX6A1,COX6B1,COX7C,CASK,ATP1A2,SNCA,ATP5F1A,ATP5F1B,ATP5PF,CHCHD10,NDUFA8,NDUFA9,NDUFB8,NDUFB9,NDUFS4,NDUFV2,DLD,DLG1,DLG4,PID1,DNM1L,NDUFA13,CYCS,ENO1,ATP6V0A2				Pathway	1017634	cAMP signaling pathway	BioSystems: KEGG	0.009686	1	0.1145	0.7468	3	198	GRIN1,ATP1A1,ATP2A2
Sorbs1		GO: Biological Process	GO:0055080	cation homeostasis		1.731e-07	0.001001	8.784e-06	8.117e-05	56	682	TPT1,HSP90B1,HMGB1,SLC22A17,SLC12A5,ATP6V1D,FKBP1A,SLC25A23,ANK2,ANK3,APLP2,APP,SLC40A1,ARF1,NPTN,ATP6V1H,ATP6V0E2,PRKACA,ATP1A1,ATP1A2,SNCA,SLC4A4,ATP2A2,ATP2B1,ATP2B2,ATP5F1B,ATP6V1C1,ATP6V1E1,ATP6V0B,ATP6V1G2,ATP6AP1,MYO5A,SRI,DBI,ITPR2,CCDC47,SLC9A7,DLG4,TAC1,TESC,CACNA1A,CALM1,CALM2,CALR,SLC39A10,TMBIM6,KCTD17,RMDN3,BCAP31,THY1,EIF5A,SLC4A10,EPAS1,ATP6V0A2,JPH3,CHP1				Pathway	138047	EPHB forward signaling	BioSystems: Pathway Interaction Database	5.313e-05	0.0203	0.0203	0.1324	3	33	KALRN,MAP4K4,ITSN1
Mxi1		GO: Biological Process	GO:0009205	purine ribonucleoside triphosphate metabolic process		1.853e-07	0.001072	9.323e-06	8.615e-05	30	263	GPHN,AK4,UQCRH,ALDOC,ATP5PD,SLC25A23,HSPA8,VCP,COX6A1,COX6B1,COX7C,ATP1A2,SNCA,ATP5F1A,ATP5F1B,ATP5PF,CHCHD10,NDUFA8,NDUFA9,NDUFB8,NDUFB9,NDUFS4,NDUFV2,DLD,PID1,DNM1L,NDUFA13,CYCS,ENO1,ATP6V0A2				Pathway	1270332	EPHB-mediated forward signaling	BioSystems: REACTOME	0.0001103	0.04213	0.02106	0.1374	3	42	GRIN1,KALRN,ITSN1
Fundc1		GO: Biological Process	GO:0032409	regulation of transporter activity		1.897e-07	0.001098	9.463e-06	8.745e-05	27	221	PDE4B,MEF2C,FKBP1A,ANK2,ANK3,YWHAE,PPP2CA,PRKACA,ATP1A2,SNCA,NOS1AP,AHCYL1,MYO5A,SRI,PLCB1,KCNAB1,DLG4,TESC,KIF5B,WNK2,CACNB1,CALM1,CALM2,GRK6,MAPK8IP2,JPH3,CHP1				Pathway	1269515	RHO GTPases activate KTN1	BioSystems: REACTOME	0.0002649	0.1012	0.03373	0.2201	2	11	KIF5A,KIF5B
Arhgdia		GO: Biological Process	GO:0010506	regulation of autophagy		2.014e-07	0.001165	9.96e-06	9.204e-05	30	264	MAPT,U2AF2,HMGB1,WAC,ATP6V1D,AKT1,SPTLC2,TMEM59,RAB3GAP1,SIRT2,ATP6V1H,ATP6V0E2,VPS35,WDFY3,SNCA,SNX5,ATP6V1C1,ATP6V1E1,ATP6V0B,ATP6V1G2,PSAP,MAP1LC3B,RAB12,TLK2,VMP1,DNM1L,EEF1A1,EEF1A2,PAFAH1B2,ATP6V0A2				Pathway	1270330	EPH-Ephrin signaling	BioSystems: REACTOME	0.001228	0.469	0.0788	0.5141	3	95	GRIN1,KALRN,ITSN1
Maged1		GO: Biological Process	GO:0048193	Golgi vesicle transport		2.287e-07	0.001323	1.121e-05	0.0001036	35	340	SORT1,ATP8A1,VCP,MIA3,ANK2,ANK3,SCAMP1,RAB14,RAB6B,SAR1A,ARF1,ARL1,CNIH4,DYNLL2,TMED9,DYNLL1,VAMP4,SNX2,MYO5A,SPTAN1,SPTBN1,YIPF5,VPS13A,RAB6A,DYNC1H1,DYNC1I2,NSF,LAMP1,VTI1A,ATP9A,KIF3A,ERGIC1,BCAP31,SAR1B,STX6				Pathway	1268747	Insulin processing	BioSystems: REACTOME	0.001778	0.6793	0.0788	0.5141	2	28	KIF5A,KIF5B
Fasn		GO: Biological Process	GO:0051932	synaptic transmission, GABAergic		2.425e-07	0.001403	1.179e-05	0.000109	12	48	GABRA1,GABRB3,GABRG2,CLSTN3,DBI,TAC1,KIF5B,DNM1,RAC1,KRAS,CACNA1A,NISCH				Pathway	1269378	Kinesins	BioSystems: REACTOME	0.004161	1	0.09933	0.648	2	43	KIF5A,KIF5B
Got1		GO: Biological Process	GO:1904062	regulation of cation transmembrane transport		2.498e-07	0.001445	1.199e-05	0.0001108	28	238	PDE4B,FKBP1A,DPP10,ANK2,ANK3,YWHAE,ARF1,PPP2CA,PRKACA,TSPAN13,ATP1A2,SNCA,NOS1AP,MYO5A,SRI,DBI,PLCB1,KCNAB1,DLG1,TESC,KIF5B,WNK2,CACNB1,CALM1,CALM2,THY1,JPH3,CHP1				Pathway	1268678	Translation	BioSystems: REACTOME	0.005871	1	0.1145	0.7468	3	165	SEC61A1,PABPC1,RPL4
Ndufb8		GO: Biological Process	GO:0051493	regulation of cytoskeleton organization		2.507e-07	0.001451	1.199e-05	0.0001108	42	452	MAP1A,MAPT,RPS3,CFL1,SKA2,PFN2,MEF2C,ADD1,MTPN,MID1IP1,PREX1,SDC4,PLXNB1,EZR,EVL,CHMP5,APC,CHORDC1,ARF1,MAPRE1,ARHGDIA,GDA,SIRT2,CTNNB1,SNCA,SPTAN1,SPTBN1,HSPH1,JMY,DLG1,GMFB,TAC1,RAC1,NPM1,CAPZA2,STMN2,GRB2,CIT,RNF4,LRP1,DYNC1LI1,CDC42				Pathway	1339121	Ion homeostasis	BioSystems: REACTOME	0.006969	1	0.1145	0.7468	2	56	ATP1A1,ATP2A2
Rps24		GO: Biological Process	GO:0017156	calcium ion regulated exocytosis		2.625e-07	0.001519	1.225e-05	0.0001132	20	133	PFN2,RPH3A,ARF1,RAB3GAP1,NAPB,DNAJC5,RIMS2,ATP2A2,SNPH,CPLX1,PLCB1,SYN1,SYT1,CACNA1A,RAP1A,RAP1B,PCLO,RAPGEF4,PIP5K1C,CHP1				Pathway	1269951	Ion transport by P-type ATPases	BioSystems: REACTOME	0.00746	1	0.1145	0.7468	2	58	ATP1A1,ATP2A2
Jph3		GO: Biological Process	GO:0097480	establishment of synaptic vesicle localization		2.625e-07	0.001519	1.225e-05	0.0001132	20	133	PFN2,RPH3A,ARF1,RAB3GAP1,NAPB,DNAJC5,CTNNB1,SNCA,RIMS2,ATP2A2,SNPH,CPLX1,SYN1,SYT1,DNM1,CACNA1A,RAP1A,RAP1B,PCLO,PIP5K1C				Pathway	1383038	Intra-Golgi and retrograde Golgi-to-ER traffic	BioSystems: REACTOME	0.007465	1	0.1145	0.7468	3	180	VTI1A,KIF5A,KIF5B
Atp5b		GO: Biological Process	GO:0048489	synaptic vesicle transport		2.625e-07	0.001519	1.225e-05	0.0001132	20	133	PFN2,RPH3A,ARF1,RAB3GAP1,NAPB,DNAJC5,CTNNB1,SNCA,RIMS2,ATP2A2,SNPH,CPLX1,SYN1,SYT1,DNM1,CACNA1A,RAP1A,RAP1B,PCLO,PIP5K1C				Pathway	1269448	NRAGE signals death through JNK	BioSystems: REACTOME	0.008486	1	0.1145	0.7468	2	62	KALRN,ITSN1
R3hdm2		GO: Biological Process	GO:0015682	ferric iron transport		2.688e-07	0.001555	1.234e-05	0.0001141	11	40	RAB11B,ATP6V1D,CLTC,ATP6V1H,ATP6V0E2,ATP6V1C1,ATP6V1E1,ATP6V0B,ATP6V1G2,ATP6AP1,ATP6V0A2				Pathway	1269171	Adaptive Immune System	BioSystems: REACTOME	0.008947	1	0.1145	0.7468	6	826	KLHL2,KIF5A,KIF5B,HUWE1,PDGFRA,SEC61A1
Atp5a1		GO: Biological Process	GO:0072512	trivalent inorganic cation transport		2.688e-07	0.001555	1.234e-05	0.0001141	11	40	RAB11B,ATP6V1D,CLTC,ATP6V1H,ATP6V0E2,ATP6V1C1,ATP6V1E1,ATP6V0B,ATP6V1G2,ATP6AP1,ATP6V0A2				Pathway	P06664	Gonadotropin-releasing hormone receptor pathway	PantherDB	0.006732	1	0.1145	0.7468	1	3	SKIL
Tnrc6c		GO: Biological Process	GO:0006873	cellular ion homeostasis		3.115e-07	0.001802	1.419e-05	0.0001311	51	607	TPT1,HSP90B1,HMGB1,SLC22A17,SLC12A5,ATP6V1D,FKBP1A,SLC25A23,ANK2,APLP2,APP,SLC40A1,ARF1,NPTN,ATP6V1H,ATP6V0E2,PRKACA,ATP1A1,ATP1A2,SNCA,SLC4A4,ATP2A2,ATP2B1,ATP2B2,ATP5F1B,ATP6V1C1,ATP6V1E1,ATP6V0B,ATP6V1G2,MYO5A,SRI,DBI,ITPR2,DLG4,TAC1,TESC,CACNA1A,CALM1,CALM2,CALR,SLC39A10,TMBIM6,KCTD17,RMDN3,BCAP31,THY1,EIF5A,SLC4A10,ATP6V0A2,JPH3,CHP1				Pathway	P00039	Metabotropic glutamate receptor group III pathway	PantherDB	0.009022	1	0.1145	0.7468	2	64	VTI1A,GRIN1
Gaa		GO: Biological Process	GO:0050767	regulation of neurogenesis		3.15e-07	0.001822	1.424e-05	0.0001316	61	784	MAP2,MAPT,CFL1,CYTH2,MBP,ETV5,CHN1,MEF2C,HNRNPK,KIDINS220,NEGR1,AKT1,FGFR1,QKI,MAP4K4,CX3CL1,PREX1,PLXNB1,VLDLR,APP,CPNE5,ARF1,ARHGDIA,NPTN,SIRT2,NSMF,CTNNB1,RAB21,RIMS2,FYN,NDRG4,RAP1GAP2,ZEB2,PTN,BMPR1A,BMPR2,PTPRD,PTPRZ1,SYT1,ITM2C,RAC1,CACNA1A,ACSL6,TCF4,RAP1A,KALRN,CALR,CAMK2B,SYNE1,NTRK2,RTN4,RAPGEF4,STMN2,SPAG9,CIT,NCS1,EEF1A1,THY1,EIF4G2,LRP1,RPL4				Pathway	PW:0000416	sentrinization	Pathway Ontology	0.006732	1	0.1145	0.7468	1	3	SUMO1
Arhgef9		GO: Biological Process	GO:0009199	ribonucleoside triphosphate metabolic process		3.287e-07	0.001902	1.474e-05	0.0001362	30	270	GPHN,AK4,UQCRH,ALDOC,ATP5PD,SLC25A23,HSPA8,VCP,COX6A1,COX6B1,COX7C,ATP1A2,SNCA,ATP5F1A,ATP5F1B,ATP5PF,CHCHD10,NDUFA8,NDUFA9,NDUFB8,NDUFB9,NDUFS4,NDUFV2,DLD,PID1,DNM1L,NDUFA13,CYCS,ENO1,ATP6V0A2				Pathway	SMP00327	Phenytoin (Antiarrhythmic) Pathway	SMPDB	0.003094	1	0.0788	0.5141	2	37	ATP1A1,ATP2A2
Stag2		GO: Biological Process	GO:0030036	actin cytoskeleton organization		3.314e-07	0.001917	1.475e-05	0.0001363	50	591	HSP90B1,CFL1,CYTH2,ACTG1,PFN2,FMNL2,MEF2C,ADD1,MTPN,MKL2,PREX1,SDC4,SDCBP,EZR,EVL,SORBS2,NEBL,GAS7,SORBS1,ARF1,ARHGDIA,ARRB1,CSRP1,PARVA,PRKAR1A,DYNLL1,PRKCZ,LIMCH1,MYH10,ARHGAP26,SPTAN1,SPTBN1,JMY,DLG1,GMFB,TAC1,RAC1,KRAS,CALR,CAPZA2,DNAJB6,GRB2,PIP5K1C,CIT,NISCH,LRP1,TMSB4X,EMP2,CDC42,EPB41L2				Pathway	SMP00332	Ibutilide Pathway	SMPDB	0.003094	1	0.0788	0.5141	2	37	ATP1A1,ATP2A2
4833439L19Rik		GO: Biological Process	GO:0009144	purine nucleoside triphosphate metabolic process		3.561e-07	0.00206	1.573e-05	0.0001453	30	271	GPHN,AK4,UQCRH,ALDOC,ATP5PD,SLC25A23,HSPA8,VCP,COX6A1,COX6B1,COX7C,ATP1A2,SNCA,ATP5F1A,ATP5F1B,ATP5PF,CHCHD10,NDUFA8,NDUFA9,NDUFB8,NDUFB9,NDUFS4,NDUFV2,DLD,PID1,DNM1L,NDUFA13,CYCS,ENO1,ATP6V0A2				Pathway	SMP00331	Flecainide Pathway	SMPDB	0.003094	1	0.0788	0.5141	2	37	ATP1A1,ATP2A2
Snca		GO: Biological Process	GO:0010976	positive regulation of neuron projection development		3.637e-07	0.002104	1.594e-05	0.0001473	31	286	MAPT,HNRNPK,KIDINS220,NEGR1,FGFR1,QKI,PLXNB1,VLDLR,CPNE5,ARF1,ARHGDIA,NPTN,RAB21,RIMS2,FYN,NDRG4,ZEB2,PTN,BMPR2,PTPRD,PTPRZ1,SYT1,ACSL6,RAP1A,KALRN,CAMK2B,NTRK2,STMN2,EEF1A1,EIF4G2,RPL4				Pathway	SMP00326	Fosphenytoin (Antiarrhythmic) Pathway	SMPDB	0.003094	1	0.0788	0.5141	2	37	ATP1A1,ATP2A2
Nrp2		GO: Biological Process	GO:0098771	inorganic ion homeostasis		3.686e-07	0.002133	1.604e-05	0.0001482	56	698	TPT1,HSP90B1,HMGB1,SLC22A17,SLC12A5,ATP6V1D,FKBP1A,SLC25A23,ANK2,ANK3,APLP2,APP,SLC40A1,ARF1,NPTN,ATP6V1H,ATP6V0E2,PRKACA,ATP1A1,ATP1A2,SNCA,SLC4A4,ATP2A2,ATP2B1,ATP2B2,ATP5F1B,ATP6V1C1,ATP6V1E1,ATP6V0B,ATP6V1G2,ATP6AP1,MYO5A,SRI,DBI,ITPR2,CCDC47,SLC9A7,DLG4,TAC1,TESC,CACNA1A,CALM1,CALM2,CALR,SLC39A10,TMBIM6,KCTD17,RMDN3,BCAP31,THY1,EIF5A,SLC4A10,EPAS1,ATP6V0A2,JPH3,CHP1				Pathway	SMP00324	Procainamide (Antiarrhythmic) Pathway	SMPDB	0.003094	1	0.0788	0.5141	2	37	ATP1A1,ATP2A2
Rftn2		GO: Biological Process	GO:0051960	regulation of nervous system development		3.998e-07	0.002313	1.726e-05	0.0001595	66	881	MAP2,MAPT,CFL1,CYTH2,MBP,ETV5,CHN1,MEF2C,HNRNPK,KIDINS220,NEGR1,LRRTM4,AKT1,FGFR1,QKI,MAP4K4,CX3CL1,PREX1,PLXNB1,VLDLR,APP,CPNE5,ARF1,ARHGDIA,NPTN,SIRT2,NSMF,PRKACA,CTNNB1,RAB21,RIMS2,FYN,NDRG4,CLSTN3,ADGRB2,RAP1GAP2,ZEB2,PTN,BMPR1A,BMPR2,PTPRD,PTPRZ1,SYT1,DLG1,ITM2C,RAC1,CACNA1A,ACSL6,TCF4,RAP1A,KALRN,CALR,CAMK2B,SYNE1,NTRK2,RTN4,RAPGEF4,STMN2,SPAG9,CIT,NCS1,EEF1A1,THY1,EIF4G2,LRP1,RPL4				Pathway	SMP00325	Disopyramide Pathway	SMPDB	0.003094	1	0.0788	0.5141	2	37	ATP1A1,ATP2A2
Mob4		GO: Biological Process	GO:0016079	synaptic vesicle exocytosis		4.061e-07	0.00235	1.741e-05	0.0001608	16	90	PFN2,RPH3A,RAB3GAP1,NAPB,DNAJC5,RIMS2,ATP2A2,SNPH,CPLX1,SYN1,SYT1,CACNA1A,RAP1A,RAP1B,PCLO,PIP5K1C				Pathway	SMP00323	Quinidine Pathway	SMPDB	0.003094	1	0.0788	0.5141	2	37	ATP1A1,ATP2A2
Slc39a10		GO: Biological Process	GO:1903729	regulation of plasma membrane organization		4.557e-07	0.002637	1.932e-05	0.0001785	15	80	AP2M1,CLTC,AKT1,STX7,EZR,DPP10,TMEM59,SORBS1,VAMP4,VPS4A,SPTBN1,DLG1,KIF5B,PID1,KALRN				Pathway	SMP00329	Mexiletine Pathway	SMPDB	0.003094	1	0.0788	0.5141	2	37	ATP1A1,ATP2A2
Slc40a1		GO: Biological Process	GO:0009123	nucleoside monophosphate metabolic process		4.575e-07	0.002647	1.932e-05	0.0001785	32	304	AK4,UQCRH,ALDOC,ATP5PD,SLC25A23,HSPA8,VCP,COX6A1,COX6B1,COX7C,CASK,ATP1A2,SNCA,ATP5F1A,ATP5F1B,ATP5PF,CHCHD10,NDUFA8,NDUFA9,NDUFB8,NDUFB9,NDUFS4,NDUFV2,DLD,DLG1,DLG4,PID1,DNM1L,NDUFA13,CYCS,ENO1,ATP6V0A2				Pathway	SMP00328	Lidocaine (Antiarrhythmic) Pathway	SMPDB	0.003094	1	0.0788	0.5141	2	37	ATP1A1,ATP2A2
Acadl		GO: Biological Process	GO:0043269	regulation of ion transport		4.963e-07	0.002871	2.081e-05	0.0001923	54	669	TTYH1,RAB11B,ABAT,PDE4B,MEF2C,SELENOK,ATP8A1,AKT1,FKBP1A,VDAC3,VIP,DPP10,ANK2,ANK3,HBP1,YWHAE,ARF1,CASK,PPP2CA,RAB3GAP1,PRKACA,TSPAN13,SARAF,CTNNB1,ATP1A1,ATP1A2,SNCA,ATP2B2,NOS1AP,AHCYL1,MYO5A,SRI,DBI,PLCB1,KCNAB1,DLG1,DLG4,TESC,KIF5B,WNK2,CACNA1A,ACSL6,CACNB1,CALM1,CALM2,CAMK2A,CAMK2B,RTN4,GRK6,THY1,CRBN,MAPK8IP2,JPH3,CHP1				Pathway	SMP00330	Tocainide Pathway	SMPDB	0.003094	1	0.0788	0.5141	2	37	ATP1A1,ATP2A2
Trak2		GO: Biological Process	GO:0031346	positive regulation of cell projection organization		5.013e-07	0.002901	2.087e-05	0.0001928	36	367	MAPT,HNRNPK,KIDINS220,NEGR1,FGFR1,QKI,PLXNB1,HSP90AA1,VLDLR,APC,CPNE5,ARF1,ARHGDIA,NPTN,RAB21,RIMS2,FYN,NDRG4,ZEB2,PTN,BMPR2,PTPRD,PTPRZ1,SYT1,RAC1,ACSL6,RAP1A,KALRN,CAMK2B,NTRK2,STMN2,KCTD17,EEF1A1,EIF4G2,CDC42,RPL4				Pathway	SMP00359	Diltiazem Pathway	SMPDB	0.007212	1	0.1145	0.7468	2	57	ATP1A1,ATP2A2
Map4k4		GO: Biological Process	GO:0006826	iron ion transport		5.691e-07	0.003293	2.352e-05	0.0002173	13	61	TTYH1,RAB11B,ATP6V1D,CLTC,SLC40A1,ATP6V1H,ATP6V0E2,ATP6V1C1,ATP6V1E1,ATP6V0B,ATP6V1G2,ATP6AP1,ATP6V0A2				Pathway	SMP00375	Verapamil Pathway	SMPDB	0.007212	1	0.1145	0.7468	2	57	ATP1A1,ATP2A2
Eif5b		GO: Biological Process	GO:0071375	cellular response to peptide hormone stimulus		6.439e-07	0.003726	2.642e-05	0.0002442	33	324	ADCY1,HNRNPK,ATP6V1D,AKT1,VLDLR,SRSF3,SRSF5,SORBS1,ATP6V1H,ATP6V0E2,PRKACA,PRKAR1A,PRKCZ,CTNNB1,FYN,ATP6V1C1,AHCYL1,ATP6V1E1,ATP6V0B,ATP6V1G2,ATP6AP1,MYO5A,GNG12,PLCB1,GNB2,PID1,GOT1,GPLD1,CAMK2A,GRB2,CAV2,GSTP1,ATP6V0A2
Mrpl30		GO: Biological Process	GO:0097479	synaptic vesicle localization		6.869e-07	0.003974	2.799e-05	0.0002586	20	141	PFN2,RPH3A,ARF1,RAB3GAP1,NAPB,DNAJC5,CTNNB1,SNCA,RIMS2,ATP2A2,SNPH,CPLX1,SYN1,SYT1,DNM1,CACNA1A,RAP1A,RAP1B,PCLO,PIP5K1C
Plekhb2		GO: Biological Process	GO:0006914	autophagy		7.489e-07	0.004333	3.03e-05	0.00028	49	590	MAP1A,MAPT,GABARAP,U2AF2,HMGB1,FUNDC1,ZFYVE1,WAC,ATP6V1D,AKT1,HSPA8,HSP90AA1,SPTLC2,TMEM59,EI24,RAB3GAP1,SIRT2,ATP6V1H,ATP6V0E2,VPS35,DYNLL2,DYNLL1,WDFY3,SNCA,LIX1,SNX5,ATP6V1C1,ATP6V1E1,ATP6V0B,ATP6V1G2,PSAP,VPS4A,MAP1LC3A,TOMM20,NDUFB9,TOMM70,MAP1LC3B,RAB12,TLK2,VMP1,DNM1L,LAMP1,VTI1A,TMBIM6,EEF1A1,EEF1A2,DZANK1,PAFAH1B2,ATP6V0A2
Speg		GO: Biological Process	GO:0006898	receptor-mediated endocytosis		7.593e-07	0.004393	3.051e-05	0.0002819	32	311	HSP90B1,LDLRAD3,HNRNPK,AP2M1,GRK2,CLTC,SDCBP,HSP90AA1,EZR,VLDLR,ARF1,ARRB1,SNCA,RAB21,ATP5F1B,HSPH1,SNAP91,MLC1,SYT1,DLG4,DNM1,RAC1,CALR,SYNE1,HIP1R,GRB2,CAV2,PIP5K1C,KIF3A,LRP1,LRPAP1,FLOT1
Itm2c		GO: Biological Process	GO:0051650	establishment of vesicle localization		8.081e-07	0.004676	3.225e-05	0.000298	28	252	RAB11B,PFN2,RPH3A,ARF1,RAB3GAP1,NAPB,DNAJC5,TMED9,PRKCZ,CTNNB1,SNCA,RIMS2,ATP2A2,SNPH,MYO5A,CPLX1,SYN1,SYT1,KIF5B,DNM1,CACNA1A,RAP1A,RAP1B,NSF,PCLO,PIP5K1C,KIF3A,SAR1B
Ncl		GO: Biological Process	GO:0009119	ribonucleoside metabolic process		8.401e-07	0.004861	3.329e-05	0.0003076	37	391	GPHN,ACACA,MAT2A,AK4,UQCRH,ALDOC,SULT4A1,ATP5PD,SLC25A23,HSPA8,VCP,COX6A1,COX6B1,COX7C,CASK,ATP1A2,SNCA,ATP5F1A,ATP5F1B,ATP5PF,AHCYL1,CHCHD10,NDUFA8,NDUFA9,NDUFB8,NDUFB9,NDUFS4,NDUFV2,DLD,DLG1,DLG4,PID1,DNM1L,NDUFA13,CYCS,ENO1,ATP6V0A2
2310035C23Rik		GO: Biological Process	GO:1902803	regulation of synaptic vesicle transport		8.527e-07	0.004934	3.356e-05	0.0003101	10	36	PFN2,RAB3GAP1,NAPB,SNCA,RIMS2,ATP2A2,SYN1,DNM1,RAP1A,RAP1B
Dars		GO: Biological Process	GO:0044403	symbiont process		8.708e-07	0.005038	3.381e-05	0.0003125	61	808	RPL30,RPL27A,RPL35A,RPL36A,RPS3,CFL1,RPS5,RPS6,RPS15,RPS15A,RTN3,RPS17,RPS19,RPS21,RPS23,RPS24,HNRNPK,RPL23,GRK2,UBE2I,USF2,HSPA8,VCP,HACD3,CHMP5,PABPC1,YWHAE,ATP6V1H,ANKRD17,DYNLL1,FYN,ZMYND11,VPS4A,NACA,NCAM1,DLG1,RAB6A,DYNC1I2,RBX1,NPM1,GRB2,LAMP1,CAV2,PSIP1,EIF4A2,TSPAN7,PAK2,DYNC1LI1,RPL13A,RPL3,RPL4,RPL5,RPL6,RPL7A,RPL9,RPL11,RPL12,RPL13,RPL17,RPL18,RPL19
Dbi		GO: Biological Process	GO:0044419	interspecies interaction between organisms		8.708e-07	0.005038	3.381e-05	0.0003125	61	808	RPL30,RPL27A,RPL35A,RPL36A,RPS3,CFL1,RPS5,RPS6,RPS15,RPS15A,RTN3,RPS17,RPS19,RPS21,RPS23,RPS24,HNRNPK,RPL23,GRK2,UBE2I,USF2,HSPA8,VCP,HACD3,CHMP5,PABPC1,YWHAE,ATP6V1H,ANKRD17,DYNLL1,FYN,ZMYND11,VPS4A,NACA,NCAM1,DLG1,RAB6A,DYNC1I2,RBX1,NPM1,GRB2,LAMP1,CAV2,PSIP1,EIF4A2,TSPAN7,PAK2,DYNC1LI1,RPL13A,RPL3,RPL4,RPL5,RPL6,RPL7A,RPL9,RPL11,RPL12,RPL13,RPL17,RPL18,RPL19
Nek7		GO: Biological Process	GO:0007409	axonogenesis		9.412e-07	0.005446	3.631e-05	0.0003355	42	475	MAP2,MAPT,MBP,NRN1,CHN1,ADCY1,PLXNB1,EZR,EVL,ANK3,APC,APP,ARHGDIA,BRSK1,RAB21,FYN,MYH10,GAP43,SPTAN1,SPTBN1,NCAM1,ZEB2,NRP2,BMPR2,SNAP91,PTPRZ1,AFG3L2,KIF5B,KIF5C,RAC1,KRAS,CACNA1A,KALRN,NTRK2,RTN4,GRB2,PIP5K1C,THY1,EIF4G2,FLOT1,RPL4,DCLK1
Csrp1		GO: Biological Process	GO:0006091	generation of precursor metabolites and energy		9.503e-07	0.005499	3.641e-05	0.0003365	37	393	PDHB,ACO2,HMGB1,AKT1,UQCRH,ALDOC,SLC25A23,SDHA,VCP,COX6A1,COX6B1,COX7C,SORBS1,PPP1CC,PRKACA,SNCA,GAA,ATP5F1B,CHCHD10,NDUFA8,NDUFA9,SUCLA2,NDUFB8,NDUFB9,NDUFS4,NDUFV2,DLD,PYGB,DLST,ALDH5A1,PID1,CALM1,CALM2,NDUFA13,TRAP1,CYCS,ENO1
Tor1aip1		GO: Biological Process	GO:0046928	regulation of neurotransmitter secretion		1.021e-06	0.005908	3.887e-05	0.0003591	13	64	PFN2,MEF2C,RAB3GAP1,NAPB,SNCA,RIMS2,ATP2A2,SYN1,CACNA1A,RAP1A,RAP1B,CAMK2A,NTRK2
Stx6		GO: Biological Process	GO:0006119	oxidative phosphorylation		1.068e-06	0.006177	4.037e-05	0.000373	17	108	UQCRH,SLC25A23,VCP,COX6A1,COX6B1,COX7C,SNCA,CHCHD10,NDUFA8,NDUFA9,NDUFB8,NDUFB9,NDUFS4,NDUFV2,DLD,NDUFA13,CYCS
Dcaf8		GO: Biological Process	GO:0050801	ion homeostasis		1.112e-06	0.006435	4.179e-05	0.0003861	58	759	TPT1,HSP90B1,HMGB1,SLC22A17,SLC12A5,ATP6V1D,FKBP1A,SLC25A23,ANK2,ANK3,APLP2,APP,SLC40A1,ARF1,NPTN,ATP6V1H,ATP6V0E2,PRKACA,ATP1A1,ATP1A2,SNCA,SLC4A4,ATP2A2,ATP2B1,ATP2B2,ATP5F1B,ATP6V1C1,ATP6V1E1,ATP6V0B,ATP6V1G2,ATP6AP1,MYO5A,SRI,DBI,ITPR2,CCDC47,SLC9A7,DLG4,TAC1,TESC,WNK2,GOT1,CACNA1A,CALM1,CALM2,CALR,SLC39A10,TMBIM6,KCTD17,RMDN3,BCAP31,THY1,EIF5A,SLC4A10,EPAS1,ATP6V0A2,JPH3,CHP1
Uhmk1		GO: Biological Process	GO:0099504	synaptic vesicle cycle		1.215e-06	0.00703	4.536e-05	0.0004191	18	121	PFN2,RPH3A,RAB3GAP1,NAPB,DNAJC5,SNCA,RIMS2,ATP2A2,SNPH,CPLX1,SYN1,SYT1,DNM1,CACNA1A,RAP1A,RAP1B,PCLO,PIP5K1C
Vamp4		GO: Biological Process	GO:1903530	regulation of secretion by cell		1.274e-06	0.007369	4.724e-05	0.0004365	57	744	ABAT,HMGB1,PFN2,MEF2C,SELENOK,CADM1,GRK2,FGFR1,MAP4K4,CX3CL1,SDC4,SDCBP,EZR,VSNL1,SCG5,RPH3A,ARF1,RAB3GAP1,ARRB1,NAPB,VPS35,PRKCZ,SNCA,RAB21,RIMS2,ATP2A2,ATP6AP1,MYO5A,VPS4A,SPTBN1,SRI,CPLX1,NCAM1,NCL,ITPR2,NELL2,PLCB1,SYN1,SYT1,TAC1,KIF5B,CACNA1A,GPLD1,RAP1A,RAP1B,NSF,CAMK2A,NTRK2,PCLO,RTN4,RAPGEF4,DNM1L,LAMP1,TMBIM6,NCS1,OXCT1,ENSA
Prdx6		GO: Biological Process	GO:0007034	vacuolar transport		1.298e-06	0.00751	4.783e-05	0.000442	30	288	RAB11B,SORT1,CLTC,FGFR1,HSPA8,EZR,CHMP5,RAB14,RAB6B,ARF1,TRAK1,ARL1,NSG1,VPS35,TMED9,RAB21,NDRG4,SNX2,SNX5,VPS4A,VPS13A,RAB6A,RAB12,LAMP1,VTI1A,SPAG9,AKTIP,EMP2,DCLK1,STX6
Kif5c		GO: Biological Process	GO:0070201	regulation of establishment of protein localization		1.334e-06	0.00772	4.886e-05	0.0004515	65	893	ABAT,U2AF2,HMGB1,SELENOK,CADM1,AKT1,DNAJA1,MAP4K4,CX3CL1,HSPA8,HSP90AA1,EZR,VSNL1,DPP10,ANK3,NSD2,NPEPPS,TMEM59,CCT2,SORBS1,YWHAE,YWHAZ,ARF1,PPP2CA,ARRB1,RGS20,CCT5,VPS35,DYNLL2,PRKACA,DYNLL1,PRKCZ,VAMP4,MXI1,GAPVD1,SPTBN1,HSPH1,SRI,NCL,B3GAT3,ITPR2,BMPR1A,SNAP91,DLG1,OS9,KIF5B,NMT1,PID1,CACNA1A,GPLD1,RAP1A,CAMK4,RAPGEF4,DNM1L,TMBIM6,KIF3A,BCAP31,UBL5,OXCT1,UHMK1,LRP1,NUTF2,CDC42,ENSA,CHP1
Yme1l1		GO: Biological Process	GO:0000904	cell morphogenesis involved in differentiation		1.5e-06	0.008677	5.457e-05	0.0005043	62	840	MAP2,MAPT,CFL1,MBP,NRN1,CHN1,ADCY1,MEF2C,KIDINS220,PREX1,SDCBP,PLXNB1,EZR,EVL,VLDLR,ANK3,APC,APP,PPP2CA,ARHGDIA,NSMF,PARVA,CTNNB1,BRSK1,RAB21,FYN,ATP2B2,MYH10,GAP43,SPTAN1,SPTBN1,NCAM1,ZEB2,NRP2,BMPR2,PTPRD,SNAP91,PTPRZ1,AFG3L2,DLG4,KIF5B,KIF5C,RAC1,KRAS,CACNA1A,KALRN,CALR,CAMK2A,CAMK2B,SYNE1,NTRK2,RTN4,GRB2,PIP5K1C,CIT,THY1,EIF4G2,FLOT1,CDC42,RPL4,DCLK1,MAPK8IP2
Ralgds		GO: Biological Process	GO:0009150	purine ribonucleotide metabolic process		1.595e-06	0.009229	5.768e-05	0.000533	45	536	GPHN,PDE4B,ACACA,PDE1B,ADCY1,AK4,UQCRH,ALDOC,SULT4A1,ATP5PD,SLC25A23,HSPA8,CAP2,VCP,VIP,COX6A1,COX6B1,COX7C,CASK,ATP1A2,SNCA,PDE7B,ATP2B2,ATP5F1A,ATP5F1B,ATP5PF,CHCHD10,NDUFA8,NDUFA9,NDUFB8,NDUFB9,NDUFS4,NDUFV2,DLD,DLG1,DLG4,PID1,CALM1,CALM2,DNM1L,ECE1,NDUFA13,CYCS,ENO1,ATP6V0A2
Dnm1		GO: Biological Process	GO:0007612	learning		1.642e-06	0.009502	5.902e-05	0.0005454	21	162	PDE1B,MEIS2,SLC12A5,ATP8A1,PPP1R1B,VDAC3,APP,NPTN,ATP1A2,FYN,NDRG4,PTN,PTPRZ1,GMFB,DLG4,TAC1,KRAS,NRGN,NTRK2,MAPK8IP2,JPH3
BC005624		GO: Biological Process	GO:0006163	purine nucleotide metabolic process		1.735e-06	0.01004	6.197e-05	0.0005727	46	555	GPHN,PDE4B,ACACA,PDE1B,ADCY1,AK4,UQCRH,ALDOC,SULT4A1,ATP5PD,SLC25A23,HSPA8,CAP2,VCP,VIP,COX6A1,COX6B1,COX7C,CASK,GDA,ATP1A2,SNCA,PDE7B,ATP2B2,ATP5F1A,ATP5F1B,ATP5PF,CHCHD10,NDUFA8,NDUFA9,NDUFB8,NDUFB9,NDUFS4,NDUFV2,DLD,DLG1,DLG4,PID1,CALM1,CALM2,DNM1L,ECE1,NDUFA13,CYCS,ENO1,ATP6V0A2
Gapvd1		GO: Biological Process	GO:0071826	ribonucleoprotein complex subunit organization		1.75e-06	0.01013	6.212e-05	0.000574	25	218	RPS5,RPS15,RPS17,RPS19,CIRBP,NOCT,SRSF5,SF1,DENR,CELF1,LUC7L2,EIF3H,FAM103A1,KIF5B,DYNC1H1,NPM1,PUM2,PSIP1,EIF5,RPL13A,RPL3,RPL5,RPL6,RPL11,RPL12
Psmd5		GO: Biological Process	GO:0051129	negative regulation of cellular component organization		1.828e-06	0.01058	6.448e-05	0.0005959	53	680	MAP1A,MAP4,CYTH2,MBP,HMGB1,PFN2,ADD1,MTPN,AP2M1,MID1IP1,CLTC,AKT1,MAP4K4,HSPA8,SDCBP,EVL,TMEM59,OTUB1,APC,SAR1A,MAPRE1,PPP2CA,ARHGDIA,SIRT2,PRKAR1A,PRKCZ,CTNNB1,SNCA,SNPH,ATRX,SPTAN1,SPTBN1,RAP1GAP2,PTN,PTPRZ1,GMFB,DLG4,ITM2C,PID1,RAC1,NPM1,RTN4,CAPZA2,DNAJB6,STMN2,CIT,THY1,LRP1,DYNC1LI1,H3F3B,RPL13A,CDC42,CRBN
Zeb2		GO: Biological Process	GO:1901653	cellular response to peptide		1.888e-06	0.01092	6.619e-05	0.0006117	33	340	ADCY1,HNRNPK,ATP6V1D,AKT1,VLDLR,SRSF3,SRSF5,SORBS1,ATP6V1H,ATP6V0E2,PRKACA,PRKAR1A,PRKCZ,CTNNB1,FYN,ATP6V1C1,AHCYL1,ATP6V1E1,ATP6V0B,ATP6V1G2,ATP6AP1,MYO5A,GNG12,PLCB1,GNB2,PID1,GOT1,GPLD1,CAMK2A,GRB2,CAV2,GSTP1,ATP6V0A2
Rab14		GO: Biological Process	GO:0051588	regulation of neurotransmitter transport		1.902e-06	0.01101	6.63e-05	0.0006127	14	78	PFN2,MEF2C,RAB3GAP1,NAPB,ATP1A2,SNCA,RIMS2,ATP2A2,SYN1,CACNA1A,RAP1A,RAP1B,CAMK2A,NTRK2
Ndufa8		GO: Biological Process	GO:0034765	regulation of ion transmembrane transport		1.973e-06	0.01142	6.837e-05	0.0006318	40	455	PDE4B,MEF2C,AKT1,FKBP1A,VDAC3,DPP10,ANK2,ANK3,YWHAE,ARF1,CASK,PPP2CA,PRKACA,TSPAN13,CTNNB1,ATP1A2,SNCA,NOS1AP,AHCYL1,MYO5A,SRI,DBI,PLCB1,KCNAB1,DLG1,DLG4,TESC,KIF5B,WNK2,CACNA1A,ACSL6,CACNB1,CALM1,CALM2,GRK6,THY1,CRBN,MAPK8IP2,JPH3,CHP1
Slc4a10		GO: Biological Process	GO:0009141	nucleoside triphosphate metabolic process		2.135e-06	0.01236	7.355e-05	0.0006796	30	295	GPHN,AK4,UQCRH,ALDOC,ATP5PD,SLC25A23,HSPA8,VCP,COX6A1,COX6B1,COX7C,ATP1A2,SNCA,ATP5F1A,ATP5F1B,ATP5PF,CHCHD10,NDUFA8,NDUFA9,NDUFB8,NDUFB9,NDUFS4,NDUFV2,DLD,PID1,DNM1L,NDUFA13,CYCS,ENO1,ATP6V0A2
Dync1i2		GO: Biological Process	GO:0008286	insulin receptor signaling pathway		2.214e-06	0.01281	7.581e-05	0.0007006	18	126	ATP6V1D,AKT1,SRSF3,SORBS1,ATP6V1H,ATP6V0E2,PRKCZ,ATP6V1C1,ATP6V1E1,ATP6V0B,ATP6V1G2,ATP6AP1,PLCB1,PID1,GPLD1,GRB2,CAV2,ATP6V0A2
Atf2		GO: Biological Process	GO:0043065	positive regulation of apoptotic process		2.27e-06	0.01313	7.726e-05	0.0007139	51	649	RPS3,RBM10,RPS6,HMGB1,MEF2C,SORT1,AES,AKT1,SPOP,DNAJA1,VCP,SFPQ,MAGED1,EI24,APC,IFIT2,ATF2,YWHAE,YWHAZ,PPP2CA,RNF7,PPP2R2B,SIRT2,ARRB1,DYNLL2,DYNLL1,CTNNB1,SNCA,CDK19,JMY,PTN,ARHGEF9,SERINC3,ITM2C,NMT1,RAC1,GPLD1,KALRN,CAMK2A,CAMK2B,DNM1L,UBE2M,PDIA3,EEF1A2,NDUFA13,BCAP31,SUDS3,CYCS,EIF5A,PAK2,CDC42
Trim44		GO: Biological Process	GO:0045666	positive regulation of neuron differentiation		2.415e-06	0.01397	8.172e-05	0.0007551	35	376	MAPT,ETV5,MEF2C,HNRNPK,KIDINS220,NEGR1,FGFR1,QKI,PLXNB1,VLDLR,CPNE5,ARF1,ARHGDIA,NPTN,RAB21,RIMS2,FYN,NDRG4,ZEB2,PTN,BMPR2,PTPRD,PTPRZ1,SYT1,ACSL6,TCF4,RAP1A,KALRN,CAMK2B,NTRK2,STMN2,SPAG9,EEF1A1,EIF4G2,RPL4
Myef2		GO: Biological Process	GO:0032869	cellular response to insulin stimulus		2.519e-06	0.01457	8.424e-05	0.0007784	24	208	HNRNPK,ATP6V1D,AKT1,VLDLR,SRSF3,SRSF5,SORBS1,ATP6V1H,ATP6V0E2,PRKCZ,ATP6V1C1,ATP6V1E1,ATP6V0B,ATP6V1G2,ATP6AP1,MYO5A,PLCB1,PID1,GOT1,GPLD1,GRB2,CAV2,GSTP1,ATP6V0A2
Cops2		GO: Biological Process	GO:0022618	ribonucleoprotein complex assembly		2.519e-06	0.01457	8.424e-05	0.0007784	24	208	RPS5,RPS15,RPS17,RPS19,CIRBP,NOCT,SRSF5,SF1,DENR,CELF1,LUC7L2,EIF3H,FAM103A1,DYNC1H1,NPM1,PUM2,PSIP1,EIF5,RPL13A,RPL3,RPL5,RPL6,RPL11,RPL12
Meis2		GO: Biological Process	GO:0051648	vesicle localization		2.555e-06	0.01478	8.495e-05	0.000785	28	267	RAB11B,PFN2,RPH3A,ARF1,RAB3GAP1,NAPB,DNAJC5,TMED9,PRKCZ,CTNNB1,SNCA,RIMS2,ATP2A2,SNPH,MYO5A,CPLX1,SYN1,SYT1,KIF5B,DNM1,CACNA1A,RAP1A,RAP1B,NSF,PCLO,PIP5K1C,KIF3A,SAR1B
Pdia3		GO: Biological Process	GO:0015672	monovalent inorganic cation transport		2.681e-06	0.01551	8.865e-05	0.0008192	49	617	ABAT,ACACA,SLC12A5,ATP6V1D,AKT1,UQCRH,ATP5PD,VIP,DPP10,ANK2,ANK3,COX6A1,COX6B1,COX7C,HBP1,YWHAE,YWHAZ,ARF1,ATP6V1H,ATP6V0E2,ATP1A1,ATP1A2,SNCA,SLC4A4,ATP5F1A,ATP5F1B,NOS1AP,ATP5PF,ATP6V1C1,AHCYL1,ATP6V1E1,ATP6V0B,ATP6V1G2,ATP6AP1,NDUFA9,PLCB1,SLC9A7,KCNAB1,DLG1,TESC,KIF5B,WNK2,CACNA1A,NSF,RTN4,MTMR6,SLC4A10,ATP6V0A2,CHP1
Map1a		GO: Biological Process	GO:0051046	regulation of secretion		2.785e-06	0.01611	9.156e-05	0.000846	59	800	ABAT,HMGB1,PFN2,MEF2C,SELENOK,CADM1,GRK2,FGFR1,MAP4K4,CX3CL1,SDC4,SDCBP,EZR,VSNL1,SCG5,RPH3A,ARF1,RAB3GAP1,ARRB1,NAPB,VPS35,PRKCZ,SNCA,RAB21,RIMS2,ATP2A2,ATP6AP1,MYO5A,MYO6,VPS4A,SPTBN1,SRI,CPLX1,NCAM1,NCL,ITPR2,NELL2,PLCB1,SYN1,SYT1,TAC1,KIF5B,MAP1LC3B,CACNA1A,GPLD1,RAP1A,RAP1B,NSF,CAMK2A,NTRK2,PCLO,RTN4,RAPGEF4,DNM1L,LAMP1,TMBIM6,NCS1,OXCT1,ENSA
Chgb		GO: Biological Process	GO:0043068	positive regulation of programmed cell death		2.956e-06	0.0171	9.662e-05	0.0008928	51	655	RPS3,RBM10,RPS6,HMGB1,MEF2C,SORT1,AES,AKT1,SPOP,DNAJA1,VCP,SFPQ,MAGED1,EI24,APC,IFIT2,ATF2,YWHAE,YWHAZ,PPP2CA,RNF7,PPP2R2B,SIRT2,ARRB1,DYNLL2,DYNLL1,CTNNB1,SNCA,CDK19,JMY,PTN,ARHGEF9,SERINC3,ITM2C,NMT1,RAC1,GPLD1,KALRN,CAMK2A,CAMK2B,DNM1L,UBE2M,PDIA3,EEF1A2,NDUFA13,BCAP31,SUDS3,CYCS,EIF5A,PAK2,CDC42
Spred1		GO: Biological Process	GO:0061564	axon development		2.983e-06	0.01726	9.696e-05	0.000896	43	514	MAP2,MAPT,MBP,NRN1,CHN1,ADCY1,PLXNB1,EZR,EVL,ANK3,APC,APP,ARHGDIA,BRSK1,RAB21,FYN,MYH10,GAP43,SPTAN1,SPTBN1,NCAM1,ZEB2,NRP2,BMPR2,SNAP91,PTPRZ1,AFG3L2,KIF5B,KIF5C,RAC1,KRAS,CACNA1A,KALRN,CALU,NTRK2,RTN4,GRB2,PIP5K1C,THY1,EIF4G2,FLOT1,RPL4,DCLK1
Snx5		GO: Biological Process	GO:0022904	respiratory electron transport chain		3.004e-06	0.01738	9.711e-05	0.0008974	16	104	UQCRH,SDHA,COX6A1,COX6B1,COX7C,SNCA,NDUFA8,NDUFA9,NDUFB8,NDUFB9,NDUFS4,NDUFV2,DLD,ALDH5A1,NDUFA13,CYCS
Napb		GO: Biological Process	GO:0009116	nucleoside metabolic process		3.083e-06	0.01784	9.91e-05	0.0009157	37	413	GPHN,ACACA,MAT2A,AK4,UQCRH,ALDOC,SULT4A1,ATP5PD,SLC25A23,HSPA8,VCP,COX6A1,COX6B1,COX7C,CASK,ATP1A2,SNCA,ATP5F1A,ATP5F1B,ATP5PF,AHCYL1,CHCHD10,NDUFA8,NDUFA9,NDUFB8,NDUFB9,NDUFS4,NDUFV2,DLD,DLG1,DLG4,PID1,DNM1L,NDUFA13,CYCS,ENO1,ATP6V0A2
Snph		GO: Biological Process	GO:0048813	dendrite morphogenesis		3.168e-06	0.01833	0.0001012	0.0009354	19	142	MAP2,CFL1,KIDINS220,VLDLR,NSMF,RAB21,FYN,PTPRD,PTPRZ1,DLG4,RAC1,CACNA1A,KALRN,CAMK2A,CAMK2B,SYNE1,CIT,DCLK1,MAPK8IP2
Mapre1		GO: Biological Process	GO:0072521	purine-containing compound metabolic process		3.184e-06	0.01842	0.0001012	0.0009354	48	603	GPHN,PDE4B,ACACA,PDE1B,MAT2A,ADCY1,AK4,UQCRH,ALDOC,SULT4A1,ATP5PD,SLC25A23,HSPA8,CAP2,VCP,VIP,COX6A1,COX6B1,COX7C,CASK,GDA,ATP1A2,SNCA,PDE7B,ATP2B2,ATP5F1A,ATP5F1B,ATP5PF,AHCYL1,CHCHD10,NDUFA8,NDUFA9,NDUFB8,NDUFB9,NDUFS4,NDUFV2,DLD,DLG1,DLG4,PID1,CALM1,CALM2,DNM1L,ECE1,NDUFA13,CYCS,ENO1,ATP6V0A2
Stmn2		GO: Biological Process	GO:0009259	ribonucleotide metabolic process		3.325e-06	0.01924	0.0001049	0.0009689	45	551	GPHN,PDE4B,ACACA,PDE1B,ADCY1,AK4,UQCRH,ALDOC,SULT4A1,ATP5PD,SLC25A23,HSPA8,CAP2,VCP,VIP,COX6A1,COX6B1,COX7C,CASK,ATP1A2,SNCA,PDE7B,ATP2B2,ATP5F1A,ATP5F1B,ATP5PF,CHCHD10,NDUFA8,NDUFA9,NDUFB8,NDUFB9,NDUFS4,NDUFV2,DLD,DLG1,DLG4,PID1,CALM1,CALM2,DNM1L,ECE1,NDUFA13,CYCS,ENO1,ATP6V0A2
Tpd52		GO: Biological Process	GO:0032271	regulation of protein polymerization		3.334e-06	0.01929	0.0001049	0.0009689	22	183	MAPT,RPS3,PFN2,ADD1,MTPN,PREX1,EVL,APC,ARF1,MAPRE1,GDA,SNCA,SPTAN1,SPTBN1,JMY,DLG1,GMFB,RAC1,CAPZA2,STMN2,TPPP,GRB2
Atp9a		GO: Biological Process	GO:0007017	microtubule-based process		3.367e-06	0.01948	0.0001053	0.0009731	51	658	MAP1A,MAP2,MAP4,MAPT,RPS3,GABARAP,SKA2,CHD3,TUBA1B,AP2M1,MID1IP1,CLTC,VBP1,EZR,CHMP5,NEK7,APC,CHORDC1,APP,MAPRE1,GDA,SIRT2,SSX2IP,DYNLL2,DYNLL1,PRKCZ,CTNNB1,SNCA,BRSK1,VAMP4,RAB21,VPS4A,KIF1B,HSPH1,TUBA1A,DLG1,KIF5B,KIF5C,CAMSAP2,RAB6A,DYNC1H1,DYNC1I2,NPM1,STMN2,TPPP,LAMP1,KIF3A,RNF4,DYNC1LI1,CDC42,CHP1
Map1lc3a		GO: Biological Process	GO:0010942	positive regulation of cell death		3.473e-06	0.02009	0.000108	0.0009982	53	695	RPS3,RBM10,RPS6,HMGB1,MEF2C,SORT1,AES,AKT1,SPOP,DNAJA1,VCP,SFPQ,MAGED1,EI24,APC,IFIT2,ATF2,YWHAE,YWHAZ,PPP2CA,RNF7,PPP2R2B,SIRT2,ARRB1,DYNLL2,DYNLL1,CTNNB1,SNCA,CDK19,JMY,PTN,PTPRZ1,ARHGEF9,SERINC3,ITM2C,NMT1,RAC1,GPLD1,KALRN,CAMK2A,CAMK2B,DNM1L,UBE2M,PDIA3,EEF1A1,EEF1A2,NDUFA13,BCAP31,SUDS3,CYCS,EIF5A,PAK2,CDC42
Ndrg3		GO: Biological Process	GO:0070507	regulation of microtubule cytoskeleton organization		3.521e-06	0.02037	0.0001087	0.001004	19	143	MAP1A,MAPT,RPS3,SKA2,MID1IP1,CHMP5,APC,CHORDC1,MAPRE1,GDA,SIRT2,CTNNB1,SNCA,HSPH1,NPM1,STMN2,RNF4,DYNC1LI1,CDC42
Ufm1		GO: Biological Process	GO:0042775	mitochondrial ATP synthesis coupled electron transport		3.532e-06	0.02043	0.0001087	0.001004	14	82	UQCRH,COX6A1,COX6B1,COX7C,SNCA,NDUFA8,NDUFA9,NDUFB8,NDUFB9,NDUFS4,NDUFV2,DLD,NDUFA13,CYCS
Dclk1		GO: Biological Process	GO:1903829	positive regulation of cellular protein localization		3.657e-06	0.02116	0.000112	0.001035	35	383	U2AF2,HNRNPK,AKT1,HSP90AA1,EZR,DPP10,ANK3,NPEPPS,CCT2,SORBS1,YWHAE,YWHAZ,NPTN,SIRT2,CCT5,DYNLL2,PRKACA,DYNLL1,FYN,SPTBN1,B3GAT3,PTN,BMPR1A,DLG1,KIF5B,NMT1,NPM1,CAMK4,CAV2,KIF3A,BCAP31,UBL5,NUTF2,CDC42,CHP1
Pfn2		GO: Biological Process	GO:1903649	regulation of cytoplasmic transport		3.82e-06	0.0221	0.0001163	0.001075	43	519	U2AF2,PFN2,FKBP1A,HSP90AA1,EZR,ANK2,NPEPPS,SAR1A,ARF1,PPP1CC,PPP2CA,RAB3GAP1,RGS20,NAPB,VPS35,PRKACA,ATP1A2,SNCA,VAMP4,RAB21,RIMS2,ATP2A2,MXI1,MYO5A,SRI,DBI,BMPR1A,YIPF5,SYN1,OS9,DNM1,RAP1A,RAP1B,CALM1,CALM2,CAMK4,BCAP31,UBL5,THY1,UHMK1,NUTF2,JPH3,CHP1
Kcnab1		GO: Biological Process	GO:0030004	cellular monovalent inorganic cation homeostasis		3.88e-06	0.02245	0.0001175	0.001086	16	106	SLC12A5,ATP6V1D,ATP6V1H,ATP6V0E2,ATP1A1,ATP1A2,SLC4A4,ATP5F1B,ATP6V1C1,ATP6V1E1,ATP6V0B,ATP6V1G2,TESC,SLC4A10,ATP6V0A2,CHP1
Ssr3		GO: Biological Process	GO:0010720	positive regulation of cell development		3.904e-06	0.02259	0.0001176	0.001087	46	572	MAPT,ETV5,MEF2C,HNRNPK,KIDINS220,NEGR1,FGFR1,QKI,CX3CL1,PREX1,SDCBP,PLXNB1,VLDLR,CPNE5,ARF1,ARHGDIA,NPTN,SIRT2,NSMF,CTNNB1,RAB21,RIMS2,FYN,NDRG4,ATP6AP1,ZEB2,PTN,BMPR2,PTPRD,PTPRZ1,SYT1,RAC1,ACSL6,TCF4,RAP1A,KALRN,CALR,CAMK2B,NTRK2,RTN4,STMN2,SPAG9,EEF1A1,EIF4G2,CDC42,RPL4
Ahcyl1		GO: Biological Process	GO:0032886	regulation of microtubule-based process		3.947e-06	0.02284	0.0001183	0.001093	21	171	MAP1A,MAPT,RPS3,SKA2,MID1IP1,CHMP5,APC,CHORDC1,MAPRE1,GDA,SIRT2,CTNNB1,SNCA,HSPH1,NPM1,STMN2,LAMP1,KIF3A,RNF4,DYNC1LI1,CDC42
Glrb		GO: Biological Process	GO:0050808	synapse organization		3.999e-06	0.02314	0.0001193	0.001102	27	258	GPHN,ETV5,MEF2C,HNRNPK,CADM1,LRRTM4,ANK3,APP,CTNNB1,SNCA,ATP2B2,CLSTN3,MYO5A,MYO6,ADGRB2,SPOCK2,PTN,PTPRD,GLRB,AFG3L2,DLG4,CACNA1A,CACNB1,CAMK2B,NTRK2,PCLO,CDC42
Celf3		GO: Biological Process	GO:0016197	endosomal transport		4.301e-06	0.02489	0.0001276	0.001179	27	259	RAB11B,SORT1,CLTC,EZR,CHMP5,RAB14,RAB6B,ARF1,TRAK1,ARL1,NSG1,VPS35,TMED9,RAB21,NDRG4,SNX2,SNX5,VPS4A,VPS13A,RAB6A,RAB12,VTI1A,SPAG9,AKTIP,EMP2,DCLK1,STX6
Zranb2		GO: Biological Process	GO:0022900	electron transport chain		4.398e-06	0.02545	0.0001298	0.0012	16	107	UQCRH,SDHA,COX6A1,COX6B1,COX7C,SNCA,NDUFA8,NDUFA9,NDUFB8,NDUFB9,NDUFS4,NDUFV2,DLD,ALDH5A1,NDUFA13,CYCS
Sdcbp		GO: Biological Process	GO:0048168	regulation of neuronal synaptic plasticity		4.533e-06	0.02623	0.0001331	0.00123	12	62	NPTN,RAB3GAP1,NSMF,SNCA,NCDN,DLG4,KRAS,CAMK2A,CAMK2B,SHISA7,SYNGR1,JPH3
Ptprd		GO: Biological Process	GO:2000300	regulation of synaptic vesicle exocytosis		4.657e-06	0.02695	0.0001361	0.001258	8	26	PFN2,RAB3GAP1,NAPB,RIMS2,ATP2A2,SYN1,RAP1A,RAP1B
Dnaja1		GO: Biological Process	GO:0060284	regulation of cell development		4.712e-06	0.02727	0.000137	0.001266	68	985	MAP2,MAPT,CFL1,CYTH2,MBP,ETV5,RPS19,CHN1,MEF2C,HNRNPK,KIDINS220,NEGR1,AKT1,FGFR1,QKI,MAP4K4,CX3CL1,PREX1,SDCBP,PLXNB1,VLDLR,APP,CPNE5,ARF1,PPP2CA,ARHGDIA,NPTN,SIRT2,NSMF,CTNNB1,RAB21,RIMS2,FYN,NDRG4,ATP6AP1,NACA,RAP1GAP2,ZEB2,PTN,BMPR1A,BMPR2,PTPRD,PTPRZ1,SYT1,ITM2C,RAC1,CACNA1A,ACSL6,TCF4,RAP1A,KALRN,CALR,CAMK2B,SYNE1,NTRK2,RTN4,RAPGEF4,STMN2,SPAG9,CIT,NCS1,EEF1A1,THY1,ZNF706,EIF4G2,LRP1,CDC42,R…
Chmp5		GO: Biological Process	GO:0034762	regulation of transmembrane transport		5.094e-06	0.02948	0.0001474	0.001362	40	473	PDE4B,MEF2C,AKT1,FKBP1A,VDAC3,DPP10,ANK2,ANK3,YWHAE,ARF1,CASK,PPP2CA,PRKACA,TSPAN13,CTNNB1,ATP1A2,SNCA,NOS1AP,AHCYL1,MYO5A,SRI,DBI,PLCB1,KCNAB1,DLG1,DLG4,TESC,KIF5B,WNK2,CACNA1A,ACSL6,CACNB1,CALM1,CALM2,GRK6,THY1,CRBN,MAPK8IP2,JPH3,CHP1
Vcp		GO: Biological Process	GO:0010256	endomembrane system organization		5.142e-06	0.02975	0.000148	0.001368	46	578	RTN3,AP2M1,CLTC,AKT1,STX7,SEC61A1,EZR,DPP10,ANK2,ANK3,CHMP5,TMEM59,SORBS1,YWHAZ,PPP2CA,ARL1,RAB3GAP1,TMED9,PRKCZ,VAMP4,ATP2A2,TOR1AIP1,MYH10,MYO5A,VPS4A,SPTBN1,CCDC47,DLG1,TESC,KIF5B,DNM1,PID1,RAC1,VMP1,KALRN,NSF,SYNE1,RTN4,VTI1A,CAV2,CIT,AKTIP,EMP2,FLOT1,CDC42,STX6
Psip1		GO: Biological Process	GO:0042773	ATP synthesis coupled electron transport		5.471e-06	0.03166	0.0001567	0.001448	14	85	UQCRH,COX6A1,COX6B1,COX7C,SNCA,NDUFA8,NDUFA9,NDUFB8,NDUFB9,NDUFS4,NDUFV2,DLD,NDUFA13,CYCS
Rps6		GO: Biological Process	GO:0035304	regulation of protein dephosphorylation		5.594e-06	0.03237	0.0001595	0.001473	20	161	HSP90B1,ZFYVE1,MEF2C,PPME1,FKBP1A,YWHAE,PPP2CA,PPP2R2B,NSMF,PPP1R16B,ARPP19,MPRIP,GPLD1,CALM1,CALM2,SLC39A10,SPRED1,ENSA,RPL5,CHP1
Pde4b		GO: Biological Process	GO:1901019	regulation of calcium ion transmembrane transporter activity		5.658e-06	0.03274	0.0001605	0.001483	13	74	PDE4B,FKBP1A,ANK2,PPP2CA,PRKACA,ATP1A2,NOS1AP,MYO5A,SRI,CACNB1,CALM1,CALM2,JPH3
Ak4		GO: Biological Process	GO:0006470	protein dephosphorylation		6.582e-06	0.03808	0.0001858	0.001717	32	344	HSP90B1,ACP2,ZFYVE1,MEF2C,PPM1H,PPME1,FKBP1A,YWHAE,PPM1G,PPP1CC,PPP2CA,PPP2R2B,NSMF,PPP1R16B,ARPP19,MPRIP,PTPRD,PTPRN2,PTPRZ1,DLG1,GPLD1,CALM1,CALM2,SLC39A10,CTDSP2,MTMR6,RPRD1A,CYCS,SPRED1,ENSA,RPL5,CHP1
Tmem59		GO: Biological Process	GO:0019693	ribose phosphate metabolic process		6.683e-06	0.03867	0.0001877	0.001735	45	566	GPHN,PDE4B,ACACA,PDE1B,ADCY1,AK4,UQCRH,ALDOC,SULT4A1,ATP5PD,SLC25A23,HSPA8,CAP2,VCP,VIP,COX6A1,COX6B1,COX7C,CASK,ATP1A2,SNCA,PDE7B,ATP2B2,ATP5F1A,ATP5F1B,ATP5PF,CHCHD10,NDUFA8,NDUFA9,NDUFB8,NDUFB9,NDUFS4,NDUFV2,DLD,DLG1,DLG4,PID1,CALM1,CALM2,DNM1L,ECE1,NDUFA13,CYCS,ENO1,ATP6V0A2
Akr1a1		GO: Biological Process	GO:1902307	positive regulation of sodium ion transmembrane transport		7.101e-06	0.04108	0.0001985	0.001834	7	20	ANK3,ARF1,PLCB1,TESC,KIF5B,WNK2,CHP1
Ddost		GO: Biological Process	GO:0006888	ER to Golgi vesicle-mediated transport		7.456e-06	0.04314	0.0002072	0.001914	21	178	VCP,MIA3,ANK2,ANK3,SAR1A,ARF1,CNIH4,DYNLL2,TMED9,DYNLL1,VAMP4,SPTAN1,SPTBN1,YIPF5,DYNC1H1,DYNC1I2,NSF,VTI1A,ERGIC1,BCAP31,SAR1B
Adgrb2		GO: Biological Process	GO:0032870	cellular response to hormone stimulus		7.484e-06	0.0433	0.0002072	0.001914	51	677	ACACA,ADCY1,TRIP4,MEF2C,HNRNPK,UBE2I,ATP6V1D,DDX54,AKT1,DNAJA1,VLDLR,SRSF3,SRSF5,CALCOCO1,SORBS1,UFM1,ATP6V1H,NSMF,ATP6V0E2,PRKACA,PRKAR1A,PRKCZ,CTNNB1,ATP1A1,ATP1A2,FYN,ATP2B1,CTSL,ATP6V1C1,AHCYL1,ATP6V1E1,ATP6V0B,ATP6V1G2,ATP6AP1,MYO5A,GNG12,PLCB1,GNB2,PID1,THRAP3,GOT1,GPLD1,CALR,CAMK2A,NTRK2,GRB2,CAV2,GSTP1,THRB,RNF4,ATP6V0A2
Sfpq		GO: Biological Process	GO:0050885	neuromuscular process controlling balance		7.585e-06	0.04389	0.000209	0.001931	12	65	EI24,APLP2,APP,GIGYF2,ATP2B2,GAA,MYH10,MYO5A,DLG4,CACNA1A,CAMK2B,JPH3
Syf2		GO: Biological Process	GO:0019058	viral life cycle		7.764e-06	0.04492	0.0002129	0.001967	38	447	RPL30,RPL27A,RPL35A,RPL36A,RPS3,RPS5,RPS6,RPS15,RPS15A,RPS17,RPS19,RPS21,RPS23,RPS24,RPL23,GRK2,USF2,VCP,HACD3,CHMP5,PABPC1,VPS4A,NCAM1,LAMP1,CAV2,RPL13A,RPL3,RPL4,RPL5,RPL6,RPL7A,RPL9,RPL11,RPL12,RPL13,RPL17,RPL18,RPL19
Tmem50a		GO: Biological Process	GO:0050769	positive regulation of neurogenesis		8.102e-06	0.04688	0.0002211	0.002043	39	465	MAPT,ETV5,MEF2C,HNRNPK,KIDINS220,NEGR1,FGFR1,QKI,CX3CL1,PLXNB1,VLDLR,CPNE5,ARF1,ARHGDIA,NPTN,NSMF,CTNNB1,RAB21,RIMS2,FYN,NDRG4,ZEB2,PTN,BMPR2,PTPRD,PTPRZ1,SYT1,ACSL6,TCF4,RAP1A,KALRN,CAMK2B,NTRK2,RTN4,STMN2,SPAG9,EEF1A1,EIF4G2,RPL4
Ncdn		GO: Biological Process	GO:0090383	phagosome acidification		8.639e-06	0.04999	0.0002347	0.002169	8	28	ATP6V1D,ATP6V1H,ATP6V0E2,ATP6V1C1,ATP6V1E1,ATP6V0B,ATP6V1G2,ATP6V0A2
Cdk14		GO: Biological Process	GO:0007169	transmembrane receptor protein tyrosine kinase signaling pathway		9.005e-06	0.0521	0.0002435	0.00225	52	700	ACTG1,CHN1,SORT1,AP2M1,ATP6V1D,AKT1,FGFR1,SDCBP,HSP90AA1,SRSF3,APLP2,SORBS1,APP,RAB14,CYFIP2,NPTN,SIRT2,ATP6V1H,ELMO2,ATP6V0E2,GIGYF2,PRKCZ,CTNNB1,SNCA,FYN,NDRG4,LGMN,ATP6V1C1,ATP6V1E1,ATP6V0B,ATP6V1G2,ATP6AP1,ERBIN,NRP2,BMPR2,PLCB1,DNM1,PID1,RAC1,KRAS,GPLD1,TCF4,KALRN,NTRK2,GRB2,CAV2,LRP1,PAK2,PLEKHA1,SPRED1,CDC42,ATP6V0A2
Prkcz		GO: Biological Process	GO:1903522	regulation of blood circulation		9.568e-06	0.05536	0.0002575	0.002379	31	334	PDE4B,GRK2,AKT1,CX3CL1,HSP90AA1,VIP,ANK2,GLRX3,SLC1A1,YWHAE,PRKACA,ATP1A1,ATP1A2,ATP2A2,ATP2B1,ATP2B2,GAA,NOS1AP,ARHGAP42,AHCYL1,SRI,ITPR2,BMPR2,TAC1,CACNB1,CALM1,CALM2,ECE1,THRB,PEBP1,EPAS1
Lrpap1		GO: Biological Process	GO:0035303	regulation of dephosphorylation		9.759e-06	0.05647	0.0002614	0.002416	20	167	HSP90B1,ZFYVE1,MEF2C,PPME1,FKBP1A,YWHAE,PPP2CA,PPP2R2B,NSMF,PPP1R16B,ARPP19,MPRIP,GPLD1,CALM1,CALM2,SLC39A10,SPRED1,ENSA,RPL5,CHP1
Add1		GO: Biological Process	GO:0072659	protein localization to plasma membrane		9.842e-06	0.05694	0.0002624	0.002425	24	225	AP2M1,CLTC,AKT1,STX7,EZR,DPP10,ANK2,ANK3,TMEM59,SORBS1,PRKCZ,VAMP4,MYO5A,VPS4A,SPTBN1,DLG1,TESC,KIF5B,PID1,RAC1,KALRN,NSF,EMP2,FLOT1
Rnf4		GO: Biological Process	GO:1901657	glycosyl compound metabolic process		1.008e-05	0.05835	0.0002676	0.002473	37	435	GPHN,ACACA,MAT2A,AK4,UQCRH,ALDOC,SULT4A1,ATP5PD,SLC25A23,HSPA8,VCP,COX6A1,COX6B1,COX7C,CASK,ATP1A2,SNCA,ATP5F1A,ATP5F1B,ATP5PF,AHCYL1,CHCHD10,NDUFA8,NDUFA9,NDUFB8,NDUFB9,NDUFS4,NDUFV2,DLD,DLG1,DLG4,PID1,DNM1L,NDUFA13,CYCS,ENO1,ATP6V0A2
Nsg1		GO: Biological Process	GO:1903779	regulation of cardiac conduction		1.051e-05	0.0608	0.0002776	0.002565	12	67	ANK2,PRKACA,ATP1A1,ATP1A2,ATP2A2,ATP2B1,ATP2B2,AHCYL1,SRI,ITPR2,CALM1,CALM2
Dnajb6		GO: Biological Process	GO:0006885	regulation of pH		1.072e-05	0.06203	0.000282	0.002605	15	102	SLC12A5,ATP6V1D,ATP6V1H,ATP6V0E2,SLC4A4,ATP5F1B,ATP6V1C1,ATP6V1E1,ATP6V0B,ATP6V1G2,ATP6AP1,SLC9A7,SLC4A10,ATP6V0A2,CHP1
Ppm1g		GO: Biological Process	GO:0016050	vesicle organization		1.118e-05	0.0647	0.0002928	0.002705	32	353	RABGAP1,SORT1,ATP8A1,STX7,SDC4,SDCBP,CHMP5,RAB14,SAR1A,RPH3A,ARF1,NSG2,NSG1,TMED9,CLINT1,VAMP4,SNX2,SNX5,TBC1D9B,SNPH,VPS4A,ZEB2,SNAP91,VAMP1,SYT1,DLG4,KIF5B,NSF,VTI1A,CAV2,SAR1B,STX6
Ociad1		GO: Biological Process	GO:0008016	regulation of heart contraction		1.132e-05	0.06548	0.000295	0.002726	25	242	PDE4B,GRK2,HSP90AA1,ANK2,GLRX3,SLC1A1,YWHAE,PRKACA,ATP1A1,ATP1A2,ATP2A2,ATP2B1,ATP2B2,GAA,NOS1AP,AHCYL1,SRI,ITPR2,TAC1,CACNB1,CALM1,CALM2,THRB,PEBP1,EPAS1
Sparcl1		GO: Biological Process	GO:1990778	protein localization to cell periphery		1.143e-05	0.06615	0.0002966	0.002741	24	227	AP2M1,CLTC,AKT1,STX7,EZR,DPP10,ANK2,ANK3,TMEM59,SORBS1,PRKCZ,VAMP4,MYO5A,VPS4A,SPTBN1,DLG1,TESC,KIF5B,PID1,RAC1,KALRN,NSF,EMP2,FLOT1
Tesc		GO: Biological Process	GO:0021762	substantia nigra development		1.173e-05	0.06788	0.000303	0.0028	10	47	MBP,COX6B1,YWHAE,SIRT2,DYNLL1,ATP5PF,CALM1,CALM2,SUDS3,CDC42
Fam168a		GO: Biological Process	GO:0071407	cellular response to organic cyclic compound		1.188e-05	0.06872	0.0003048	0.002816	44	561	HSP90B1,PDE4B,PENK,ADCY1,TRIP4,MEF2C,HNRNPK,UBE2I,DDX54,AKT1,DNAJA1,EZR,CALCOCO1,APP,UFM1,NCOR2,SIRT2,RGS20,DROSHA,PRKACA,CTNNB1,ATP1A1,ATP1A2,SNCA,ATP2B1,GABRA1,GABRB3,GABRG2,ITPR2,PTN,MLC1,THRAP3,NPM1,GPLD1,RAP1A,RAP1B,CALR,NTRK2,PDIA3,GSTP1,THRB,RNF4,PAK2,FLOT1
Atp2a2		GO: Biological Process	GO:0051453	regulation of intracellular pH		1.191e-05	0.06888	0.0003048	0.002816	13	79	SLC12A5,ATP6V1D,ATP6V1H,ATP6V0E2,SLC4A4,ATP5F1B,ATP6V1C1,ATP6V1E1,ATP6V0B,ATP6V1G2,SLC4A10,ATP6V0A2,CHP1
Ncor2		GO: Biological Process	GO:0051258	protein polymerization		1.216e-05	0.07033	0.0003098	0.002863	25	243	MAPT,RPS3,PFN2,ADD1,MTPN,MID1IP1,PREX1,EVL,APC,GAS7,ARF1,MAPRE1,GDA,SNCA,SPTAN1,SPTBN1,JMY,DLG1,GMFB,RAC1,CAPZA2,STMN2,TPPP,GRB2,DNM1L
Cit		GO: Biological Process	GO:0010608	posttranscriptional regulation of gene expression		1.325e-05	0.07665	0.0003362	0.003107	39	475	ABCF1,RPS3,PAIP2,RPS5,RBM10,MTPN,CIRBP,AKT1,NOCT,QKI,HSPA8,VIP,TNRC6C,APP,PABPC1,YWHAZ,NCOR2,CELF1,DROSHA,EIF5B,GIGYF2,EIF3H,PAIP2B,PSMC6,PSMD5,PSMD11,DHX9,THRAP3,NPM1,CALR,PUM2,TRAP1,ZNF706,EIF4A2,UHMK1,EIF4G2,EIF5,EIF5A,RPL13A
Ddx54		GO: Biological Process	GO:2000651	positive regulation of sodium ion transmembrane transporter activity		1.355e-05	0.07838	0.0003423	0.003163	6	15	ANK3,PLCB1,TESC,KIF5B,WNK2,CHP1
Rph3a		GO: Biological Process	GO:0030900	forebrain development		1.381e-05	0.07991	0.0003469	0.003206	35	407	HNRNPK,MKL2,FGFR1,VLDLR,APLP2,APP,SLC1A2,YWHAE,NCOR2,RNF7,RAB3GAP1,CHD5,CTNNB1,FYN,MYH10,ATRX,NCAM1,DBI,ZEB2,NRP2,PTN,BMPR1A,GNG12,PTPRZ1,PLCB1,RAC1,AGTPBP1,KRAS,NRGN,NTRK2,RTN4,KIF3A,SLC4A10,LRP1,DCLK1
Rpl6		GO: Biological Process	GO:1903513	endoplasmic reticulum to cytosol transport		1.387e-05	0.08022	0.0003469	0.003206	11	58	HSP90B1,VCP,SEL1L,ANK2,PRKACA,ATP1A2,SRI,OS9,CALM1,CALM2,BCAP31
Hsph1		GO: Biological Process	GO:0060047	heart contraction		1.391e-05	0.08049	0.0003469	0.003206	27	276	PDE4B,GRK2,HSP90AA1,ANK2,GLRX3,SLC1A1,YWHAE,PRKACA,ATP1A1,ATP1A2,ATP2A2,ATP2B1,ATP2B2,GAA,NOS1AP,AHCYL1,SRI,ITPR2,TAC1,CACNB1,CALM1,CALM2,DNM1L,THRB,PEBP1,CDC42,EPAS1
Gnb2		GO: Biological Process	GO:1904951	positive regulation of establishment of protein localization		1.416e-05	0.08192	0.0003516	0.003249	44	565	ABAT,U2AF2,HMGB1,SELENOK,CADM1,AKT1,HSP90AA1,EZR,VSNL1,DPP10,ANK3,NPEPPS,CCT2,SORBS1,YWHAE,YWHAZ,ARF1,ARRB1,CCT5,VPS35,DYNLL2,PRKACA,DYNLL1,PRKCZ,SPTBN1,SRI,NCL,B3GAT3,BMPR1A,DLG1,KIF5B,NMT1,GPLD1,CAMK4,RAPGEF4,DNM1L,KIF3A,BCAP31,UBL5,OXCT1,LRP1,NUTF2,CDC42,CHP1
Calu		GO: Biological Process	GO:0016241	regulation of macroautophagy		1.526e-05	0.0883	0.0003757	0.003471	19	158	U2AF2,WAC,ATP6V1D,SPTLC2,RAB3GAP1,ATP6V1H,ATP6V0E2,VPS35,WDFY3,SNX5,ATP6V1C1,ATP6V1E1,ATP6V0B,ATP6V1G2,MAP1LC3B,RAB12,DNM1L,PAFAH1B2,ATP6V0A2
Klhdc10		GO: Biological Process	GO:0055067	monovalent inorganic cation homeostasis		1.526e-05	0.0883	0.0003757	0.003471	19	158	SLC12A5,ATP6V1D,ATP6V1H,ATP6V0E2,ATP1A1,ATP1A2,SLC4A4,ATP5F1B,ATP6V1C1,ATP6V1E1,ATP6V0B,ATP6V1G2,ATP6AP1,SLC9A7,TAC1,TESC,SLC4A10,ATP6V0A2,CHP1
Luc7l2		GO: Biological Process	GO:0051962	positive regulation of nervous system development		1.532e-05	0.08866	0.0003757	0.003471	42	531	MAPT,ETV5,MEF2C,HNRNPK,KIDINS220,NEGR1,LRRTM4,FGFR1,QKI,CX3CL1,PLXNB1,VLDLR,CPNE5,ARF1,ARHGDIA,NPTN,NSMF,CTNNB1,RAB21,RIMS2,FYN,NDRG4,CLSTN3,ADGRB2,ZEB2,PTN,BMPR2,PTPRD,PTPRZ1,SYT1,ACSL6,TCF4,RAP1A,KALRN,CAMK2B,NTRK2,RTN4,STMN2,SPAG9,EEF1A1,EIF4G2,RPL4
Ptn		GO: Biological Process	GO:0030641	regulation of cellular pH		1.575e-05	0.09113	0.0003845	0.003553	13	81	SLC12A5,ATP6V1D,ATP6V1H,ATP6V0E2,SLC4A4,ATP5F1B,ATP6V1C1,ATP6V1E1,ATP6V0B,ATP6V1G2,SLC4A10,ATP6V0A2,CHP1
Mtpn		GO: Biological Process	GO:0090382	phagosome maturation		1.599e-05	0.09252	0.0003887	0.003592	9	39	ATP6V1D,RAB14,ATP6V1H,ATP6V0E2,ATP6V1C1,ATP6V1E1,ATP6V0B,ATP6V1G2,ATP6V0A2
Mkrn1		GO: Biological Process	GO:1990542	mitochondrial transmembrane transport		1.644e-05	0.09514	0.0003981	0.003678	11	59	ACACA,TIMM23,TIMM17A,ATP5PD,HSP90AA1,ATP5F1A,ATP5F1B,ATP5PF,TOMM20,AFG3L2,NDUFA13
Pcyox1		GO: Biological Process	GO:0003015	heart process		1.691e-05	0.09782	0.0004076	0.003766	27	279	PDE4B,GRK2,HSP90AA1,ANK2,GLRX3,SLC1A1,YWHAE,PRKACA,ATP1A1,ATP1A2,ATP2A2,ATP2B1,ATP2B2,GAA,NOS1AP,AHCYL1,SRI,ITPR2,TAC1,CACNB1,CALM1,CALM2,DNM1L,THRB,PEBP1,CDC42,EPAS1
Pole4		GO: Biological Process	GO:0007626	locomotory behavior		1.901e-05	0.11	0.0004561	0.004214	24	234	ABAT,PDE1B,MAPT,PENK,ETV5,NEGR1,APLP2,APP,GIGYF2,ATP1A2,SNCA,ATP2B2,GAA,GAD1,MYO5A,MYO6,GLRB,VPS13A,GMFB,DLG4,DNM1,AGTPBP1,CACNA1A,SLC4A10
Cnbp		GO: Biological Process	GO:1903169	regulation of calcium ion transmembrane transport		1.908e-05	0.1104	0.0004561	0.004214	17	133	PDE4B,FKBP1A,ANK2,PPP2CA,PRKACA,TSPAN13,ATP1A2,SNCA,NOS1AP,MYO5A,SRI,DBI,CACNB1,CALM1,CALM2,THY1,JPH3
Sec61a1		GO: Biological Process	GO:0031333	negative regulation of protein complex assembly		1.957e-05	0.1132	0.0004659	0.004305	16	120	HMGB1,PFN2,ADD1,MTPN,EVL,SAR1A,MAPRE1,SIRT2,PRKCZ,SNCA,SPTAN1,SPTBN1,CAPZA2,STMN2,CDC42,CRBN
Ptms		GO: Biological Process	GO:0061684	chaperone-mediated autophagy		2.005e-05	0.116	0.0004734	0.004375	5	10	HSPA8,HSP90AA1,SNCA,EEF1A1,EEF1A2
Rasgef1a		GO: Biological Process	GO:1901841	regulation of high voltage-gated calcium channel activity		2.005e-05	0.116	0.0004734	0.004375	5	10	PDE4B,NOS1AP,SRI,CALM1,CALM2
Ldhb		GO: Biological Process	GO:0032868	response to insulin		2.027e-05	0.1173	0.0004767	0.004405	26	266	HNRNPK,SORT1,ATP6V1D,AKT1,VLDLR,SRSF3,SRSF5,SORBS1,ATP6V1H,ATP6V0E2,PRKCZ,ATP6V1C1,ATP6V1E1,ATP6V0B,ATP6V1G2,ATP6AP1,MYO5A,PLCB1,PID1,GOT1,GPLD1,GRB2,CAV2,GSTP1,INSIG2,ATP6V0A2
Kras		GO: Biological Process	GO:0030901	midbrain development		2.046e-05	0.1184	0.0004793	0.004429	14	95	MBP,FGFR1,COX6B1,APLP2,YWHAE,SIRT2,DYNLL1,CTNNB1,ATP5PF,RAC1,CALM1,CALM2,SUDS3,CDC42
Itpr2		GO: Biological Process	GO:0030705	cytoskeleton-dependent intracellular transport		2.106e-05	0.1219	0.0004914	0.00454	17	134	MAPT,TUBA1B,APP,SSX2IP,DYNLL1,PRKCZ,RAB21,MYO5A,MYO10,KIF1B,TUBA1A,KIF5B,KIF5C,RAB6A,LAMP1,KIF3A,CDC42
Atp2b2		GO: Biological Process	GO:0045055	regulated exocytosis		2.144e-05	0.1241	0.0004982	0.004604	29	315	RAB11B,PFN2,APLP2,APP,YWHAZ,RPH3A,ARF1,RAB3GAP1,NAPB,DNAJC5,RIMS2,ATP2A2,SNPH,PSAP,CPLX1,PLCB1,SYN1,SYT1,CACNA1A,RAP1A,RAP1B,CALM1,CALM2,PCLO,RAPGEF4,LAMP1,PIP5K1C,TMSB4X,CHP1
Vamp1		GO: Biological Process	GO:0043270	positive regulation of ion transport		2.322e-05	0.1344	0.0005375	0.004967	27	284	ABAT,ATP8A1,AKT1,ANK2,ANK3,HBP1,ARF1,CASK,RAB3GAP1,SNCA,ATP2B2,NOS1AP,AHCYL1,SRI,DBI,PLCB1,DLG1,TESC,KIF5B,WNK2,ACSL6,CALM1,CALM2,CAMK2A,RTN4,THY1,CHP1
Ttyh1		GO: Biological Process	GO:0043547	positive regulation of GTPase activity		2.369e-05	0.1371	0.0005461	0.005047	47	632	CYTH2,RABGAP1,CHN1,FGFR1,CX3CL1,PREX1,PLXNB1,HACD3,ARHGAP5,ARHGDIA,RAB3GAP1,ARRB1,RGS20,FYN,ARHGAP42,ARHGAP32,GAPVD1,TBC1D9B,PSD,ARHGAP26,SPTAN1,SPTBN1,RAP1GAP2,NCAM1,GDI2,ARHGEF9,PLCB1,DLG4,RALGDS,RAP1A,CALM1,CALM2,KALRN,CAMK2A,CAMK2B,RAPGEF4,PSD3,GRB2,RASGEF1A,CAV2,RGS4,THY1,RABEP1,EIF5,ACAP2,SPATA13,RAPGEFL1
U2af2		GO: Biological Process	GO:0045851	pH reduction		2.511e-05	0.1453	0.0005765	0.005327	10	51	SLC12A5,ATP6V1D,ATP6V1H,ATP6V0E2,ATP6V1C1,ATP6V1E1,ATP6V0B,ATP6V1G2,ATP6AP1,ATP6V0A2
Psd3		GO: Biological Process	GO:0010638	positive regulation of organelle organization		2.61e-05	0.151	0.0005955	0.005502	46	616	MAPT,RPS3,CFL1,U2AF2,PFN2,SDC4,SDCBP,EVL,SFPQ,NPEPPS,NEK7,APC,CCT2,YWHAE,YWHAZ,ARF1,GDA,RAB3GAP1,SIRT2,ARRB1,CCT5,DYNLL2,TMED9,DYNLL1,KDM2A,CTNNB1,CHTOP,ATRX,VPS4A,JMY,PLCB1,SYT1,DLG1,GMFB,TAC1,KIF5B,NMT1,RAC1,NPM1,CAMK2B,STMN2,GRB2,DNM1L,KCTD17,UBL5,PEBP1
1110004F10Rik		GO: Biological Process	GO:0050773	regulation of dendrite development		2.614e-05	0.1512	0.0005955	0.005502	18	150	CFL1,CYTH2,MEF2C,HNRNPK,PREX1,VLDLR,ARF1,NSMF,RAB21,PTPRD,PTPRZ1,KALRN,CAMK2B,SYNE1,NTRK2,RAPGEF4,CIT,EIF4G2
Rab6a		GO: Biological Process	GO:0009117	nucleotide metabolic process		2.786e-05	0.1612	0.0006322	0.005842	50	692	GPHN,PDE4B,ACACA,PDE1B,PDHB,ADCY1,AK4,UQCRH,ALDOC,SULT4A1,ATP5PD,SLC25A23,HSPA8,CAP2,VCP,VIP,COX6A1,COX6B1,COX7C,CASK,GDA,ATP1A2,SNCA,PDE7B,ATP2B2,ATP5F1A,ATP5F1B,ATP5PF,CHCHD10,NDUFA8,NDUFA9,NDUFB8,NDUFB9,NDUFS4,NDUFV2,DLD,DLG1,DLG4,DLST,PID1,CALM1,CALM2,DNM1L,ECE1,LDHB,NDUFA13,NUDT3,CYCS,ENO1,ATP6V0A2
Mrpl48		GO: Biological Process	GO:0010921	regulation of phosphatase activity		2.817e-05	0.163	0.000636	0.005877	17	137	HSP90B1,ZFYVE1,MEF2C,PPME1,FKBP1A,PPP2CA,PPP2R2B,ARPP19,MPRIP,GPLD1,CALM1,CALM2,SLC39A10,SPRED1,ENSA,RPL5,CHP1
Ppme1		GO: Biological Process	GO:0043112	receptor metabolic process		2.825e-05	0.1634	0.000636	0.005877	19	165	RAB11B,HNRNPK,GRK2,CLTC,SDCBP,EZR,CHMP5,ARF1,ARRB1,NSG1,SNCA,LGMN,DLG4,DNM1,NSF,GRB2,GRIA3,ECE1,FLOT1
Rps3		GO: Biological Process	GO:0051208	sequestering of calcium ion		2.96e-05	0.1712	0.0006637	0.006133	16	124	HSP90B1,FKBP1A,SLC25A23,ANK2,PRKACA,ATP1A2,SNCA,MYO5A,SRI,DBI,ITPR2,CALM1,CALM2,CALR,THY1,JPH3
Parva		GO: Biological Process	GO:0019932	second-messenger-mediated signaling		3.153e-05	0.1824	0.0007043	0.006508	25	257	ADCY1,SELENOK,FKBP1A,ANK2,PPP2CA,PRKACA,ATP1A2,RIMS2,NFAT5,ATP2A2,NOS1AP,MYO5A,SRI,NCAM1,NDUFS4,ITPR2,CALM1,CALM2,NTRK2,PCLO,RAPGEF4,BCAP31,PEBP1,JPH3,CHP1
Rnf141		GO: Biological Process	GO:0043434	response to peptide hormone		3.354e-05	0.194	0.0007463	0.006896	36	442	ADCY1,HNRNPK,SORT1,ATP6V1D,AKT1,VLDLR,SRSF3,SRSF5,SORBS1,ATP6V1H,ATP6V0E2,PRKACA,PRKAR1A,PRKCZ,CTNNB1,FYN,ATP2A2,ATP6V1C1,AHCYL1,ATP6V1E1,ATP6V0B,ATP6V1G2,ATP6AP1,MYO5A,GNG12,PLCB1,GNB2,PID1,GOT1,GPLD1,CAMK2A,GRB2,CAV2,GSTP1,INSIG2,ATP6V0A2
Fus		GO: Biological Process	GO:0051924	regulation of calcium ion transport		3.531e-05	0.2043	0.0007827	0.007232	24	243	PDE4B,SELENOK,FKBP1A,ANK2,CASK,PPP2CA,PRKACA,TSPAN13,SARAF,CTNNB1,ATP1A2,SNCA,ATP2B2,NOS1AP,MYO5A,SRI,DBI,CACNB1,CALM1,CALM2,CAMK2A,CAMK2B,THY1,JPH3
Nomo1		GO: Biological Process	GO:0007009	plasma membrane organization		3.567e-05	0.2064	0.0007877	0.007279	27	291	AP2M1,CLTC,AKT1,STX7,EZR,DPP10,ANK2,ANK3,TMEM59,SORBS1,PRKCZ,VAMP4,ATP2A2,MYH10,MYO5A,VPS4A,SPTBN1,DLG1,TESC,KIF5B,PID1,RAC1,KALRN,NSF,CAV2,EMP2,FLOT1
Bccip		GO: Biological Process	GO:2001257	regulation of cation channel activity		3.689e-05	0.2134	0.0008116	0.007499	14	100	PDE4B,FKBP1A,ANK2,ANK3,PRKACA,NOS1AP,MYO5A,SRI,KCNAB1,KIF5B,CACNB1,CALM1,CALM2,JPH3
Atp6ap2		GO: Biological Process	GO:0007264	small GTPase mediated signal transduction		3.716e-05	0.215	0.0008144	0.007525	44	588	RAB11B,CFL1,CYTH2,CHN1,PREX1,SDCBP,HACD3,RAB14,RAB6B,ARF1,ARHGAP5,ARHGDIA,ARL1,ARRB1,SSX2IP,RAB21,ARHGAP42,ARHGAP32,ARPP19,PSD,ARHGAP26,RAP1GAP2,GDI2,ARL5A,ARHGEF9,RAB6A,RAC1,RAB12,KRAS,RALGDS,RAP1A,RAP1B,KALRN,RAPGEF4,PSD3,GRB2,RASGEF1A,G3BP1,NISCH,FLOT1,CDC42,SPATA13,RAPGEFL1,CHP1
Cask		GO: Biological Process	GO:0009894	regulation of catabolic process		3.873e-05	0.2241	0.0008457	0.007815	54	777	MAPT,U2AF2,HMGB1,WAC,ATP6V1D,AKT1,SDCBP,VCP,EZR,VIP,SPTLC2,TMEM59,APC,TNRC6C,PABPC1,PPP2CA,RAB3GAP1,SIRT2,ATP6V1H,CSNK1E,ATP6V0E2,VPS35,PRKACA,SUMO2,WDFY3,SNCA,FYN,SNX5,ATP6V1C1,ATP6V1E1,ATP6V0B,ATP6V1G2,PSAP,PSMC6,PSMD5,PSMD11,DBI,OS9,MAP1LC3B,RAB12,TLK2,VMP1,GPLD1,NSF,COP1,DNM1L,EEF1A1,EEF1A2,NDUFA13,BCAP31,PAFAH1B2,DYNC1LI1,CDC42,ATP6V0A2
Rbm10		GO: Biological Process	GO:0006753	nucleoside phosphate metabolic process		4.033e-05	0.2334	0.0008773	0.008107	50	702	GPHN,PDE4B,ACACA,PDE1B,PDHB,ADCY1,AK4,UQCRH,ALDOC,SULT4A1,ATP5PD,SLC25A23,HSPA8,CAP2,VCP,VIP,COX6A1,COX6B1,COX7C,CASK,GDA,ATP1A2,SNCA,PDE7B,ATP2B2,ATP5F1A,ATP5F1B,ATP5PF,CHCHD10,NDUFA8,NDUFA9,NDUFB8,NDUFB9,NDUFS4,NDUFV2,DLD,DLG1,DLG4,DLST,PID1,CALM1,CALM2,DNM1L,ECE1,LDHB,NDUFA13,NUDT3,CYCS,ENO1,ATP6V0A2
Glrx3		GO: Biological Process	GO:0000226	microtubule cytoskeleton organization		4.116e-05	0.2381	0.0008919	0.008241	37	464	MAP1A,MAP2,MAP4,MAPT,RPS3,GABARAP,SKA2,CHD3,TUBA1B,MID1IP1,CLTC,EZR,CHMP5,NEK7,APC,CHORDC1,MAPRE1,GDA,SIRT2,SSX2IP,PRKCZ,CTNNB1,SNCA,BRSK1,VAMP4,VPS4A,HSPH1,DLG1,CAMSAP2,DYNC1H1,NPM1,STMN2,TPPP,RNF4,DYNC1LI1,CDC42,CHP1
Wdr13		GO: Biological Process	GO:0010765	positive regulation of sodium ion transport		4.484e-05	0.2595	0.0009681	0.008946	9	44	AKT1,ANK3,ARF1,AHCYL1,PLCB1,TESC,KIF5B,WNK2,CHP1
Vbp1		GO: Biological Process	GO:0043087	regulation of GTPase activity		4.821e-05	0.2789	0.001037	0.009582	49	688	CYTH2,RABGAP1,CHN1,FGFR1,CX3CL1,PREX1,PLXNB1,HACD3,ARHGAP5,ARHGDIA,RAB3GAP1,ARRB1,RGS20,FYN,ARHGAP42,ARHGAP32,GAPVD1,TBC1D9B,PSD,ARHGAP26,SPTAN1,SPTBN1,RAP1GAP2,NCAM1,GDI2,PTPRN2,ARHGEF9,PLCB1,DLG4,RALGDS,RAP1A,CALM1,CALM2,KALRN,CAMK2A,CAMK2B,NTRK2,RAPGEF4,PSD3,GRB2,RASGEF1A,CAV2,RGS4,THY1,RABEP1,EIF5,ACAP2,SPATA13,RAPGEFL1
Atrx		GO: Biological Process	GO:0051705	multi-organism behavior		4.98e-05	0.2881	0.001067	0.009861	13	90	PENK,PHF21A,PPP1R1B,APLP2,APP,UBR3,GAD1,VPS13A,DLG4,KRAS,KALRN,THRB,MAPK8IP2
Morf4l2		GO: Biological Process	GO:1904064	positive regulation of cation transmembrane transport		5.08e-05	0.2939	0.001085	0.01002	15	116	ANK2,ANK3,ARF1,SNCA,NOS1AP,SRI,DBI,PLCB1,TESC,KIF5B,WNK2,CALM1,CALM2,THY1,CHP1
Lamp1		GO: Biological Process	GO:0034470	ncRNA processing		5.243e-05	0.3034	0.001115	0.01031	33	399	RPL30,RPL27A,RPL35A,RPL36A,RPS3,RPS5,RPS6,RPS15,RPS15A,RPS17,RPS19,RPS21,RPS23,RPS24,RPL23,RPL7L1,DROSHA,CSNK1E,NCL,PAPD5,RPL13A,RPL3,RPL4,RPL5,RPL6,RPL7A,RPL9,RPL11,RPL12,RPL13,RPL17,RPL18,RPL19
Saraf		GO: Biological Process	GO:1903523	negative regulation of blood circulation		5.411e-05	0.3131	0.001147	0.0106	9	45	GRK2,CX3CL1,ATP1A1,ATP1A2,ATP2A2,ARHGAP42,SRI,BMPR2,TAC1
Wwc2		GO: Biological Process	GO:0048589	developmental growth		5.555e-05	0.3214	0.001173	0.01084	48	673	MAPT,NRN1,MEF2C,HNRNPK,ADD1,SLC12A5,MTPN,WWC2,CADM1,FGFR1,PLXNB1,EZR,SORBS2,APP,CPNE5,SLC1A2,CELF1,PRKAR1A,GIGYF2,KDM2A,PRKCZ,CTNNB1,RAB21,RIMS2,NDRG4,LGMN,PSAP,ATRX,GAP43,NACA,NCAM1,ZEB2,NRP2,BMPR1A,BMPR2,DHCR7,AFG3L2,PLCB1,SYT1,DLG1,RTN4,EIF4G2,SLC4A10,PLEKHA1,H3F3B,CDC42,RPL4,DCLK1
Fgfr1		GO: Biological Process	GO:0043666	regulation of phosphoprotein phosphatase activity		5.67e-05	0.3281	0.001193	0.01102	11	67	HSP90B1,PPME1,FKBP1A,PPP2CA,PPP2R2B,ARPP19,MPRIP,CALM1,CALM2,SLC39A10,ENSA
Msmo1		GO: Biological Process	GO:0006457	protein folding		6.275e-05	0.3631	0.001315	0.01216	23	236	HSP90B1,PFDN5,SELENOF,DNAJA1,FKBP1A,HSPA8,VBP1,HSP90AA1,CCT2,CHORDC1,CCT5,DNAJB11,MLEC,HSPH1,TMX1,GANAB,GNB2,CALR,DNAJB6,PDIA3,TRAP1,TMX4,LRPAP1
Klhl2		GO: Biological Process	GO:0044839	cell cycle G2/M phase transition		6.316e-05	0.3654	0.001319	0.01219	21	205	CDK14,HSP90AA1,SYF2,APP,YWHAE,MAPRE1,CSNK1E,PRKACA,DYNLL1,BRSK1,ARPP19,TUBA1A,PLCB1,DYNC1H1,DYNC1I2,NPM1,CALM1,CALM2,CIT,CCNG1,ENSA
Sorbs2		GO: Biological Process	GO:0048255	mRNA stabilization		6.361e-05	0.3681	0.001324	0.01223	8	36	RBM10,CIRBP,NOCT,QKI,VIP,PABPC1,DHX9,THRAP3
Aktip		GO: Biological Process	GO:0010644	cell communication by electrical coupling		6.391e-05	0.3698	0.001325	0.01225	7	27	ANK3,PRKACA,ATP1A1,ATP1A2,SRI,CALM1,CALM2
Got2		GO: Biological Process	GO:0010498	proteasomal protein catabolic process		6.828e-05	0.3951	0.001411	0.01304	34	422	HSP90B1,MARCH6,WAC,UBE2A,UBE2I,AKT1,SPOP,SDCBP,VCP,SEL1L,RNF44,APC,RNF7,SIRT2,ARRB1,CSNK1E,PRKACA,UBR3,SUMO2,CTNNB1,PSMC6,PSMD5,PSMD11,CCDC47,OS9,RBX1,TLK2,PCNP,COP1,KCTD17,BCAP31,RNF4,DYNC1LI1,CRBN
Vps35		GO: Biological Process	GO:0042255	ribosome assembly		6.856e-05	0.3967	0.001412	0.01305	10	57	RPS5,RPS15,RPS17,RPS19,NPM1,RPL3,RPL5,RPL6,RPL11,RPL12
St3gal2		GO: Biological Process	GO:1901652	response to peptide		7.34e-05	0.4247	0.001506	0.01392	37	477	ADCY1,HNRNPK,SORT1,ATP6V1D,AKT1,VLDLR,SRSF3,SRSF5,SORBS1,ATP6V1H,ATP6V0E2,PRKACA,PRKAR1A,PRKCZ,CTNNB1,FYN,ATP2A2,ATP6V1C1,AHCYL1,ATP6V1E1,ATP6V0B,ATP6V1G2,ATP6AP1,MYO5A,ERBIN,GNG12,PLCB1,GNB2,PID1,GOT1,GPLD1,CAMK2A,GRB2,CAV2,GSTP1,INSIG2,ATP6V0A2
Cx3cl1		GO: Biological Process	GO:0050905	neuromuscular process		7.547e-05	0.4367	0.001543	0.01426	15	120	PENK,EI24,APLP2,APP,GIGYF2,ATP2B2,GAA,MYH10,MYO5A,GLRB,DLG4,AGTPBP1,CACNA1A,CAMK2B,JPH3
Map1lc3b		GO: Biological Process	GO:0032071	regulation of endodeoxyribonuclease activity		7.617e-05	0.4407	0.001552	0.01434	4	7	RPS3,HMGB1,AKT1,NPM1
Emc8		GO: Biological Process	GO:0031329	regulation of cellular catabolic process		7.676e-05	0.4441	0.001558	0.0144	47	663	MAPT,U2AF2,HMGB1,WAC,ATP6V1D,AKT1,SDCBP,VCP,EZR,SPTLC2,TMEM59,APC,TNRC6C,PABPC1,RAB3GAP1,SIRT2,ATP6V1H,CSNK1E,ATP6V0E2,VPS35,PRKACA,SUMO2,WDFY3,SNCA,SNX5,ATP6V1C1,ATP6V1E1,ATP6V0B,ATP6V1G2,PSAP,PSMC6,PSMD5,PSMD11,DBI,MAP1LC3B,RAB12,TLK2,VMP1,GPLD1,COP1,DNM1L,EEF1A1,EEF1A2,BCAP31,PAFAH1B2,DYNC1LI1,ATP6V0A2
Mast3		GO: Biological Process	GO:0043489	RNA stabilization		7.838e-05	0.4535	0.001586	0.01465	8	37	RBM10,CIRBP,NOCT,QKI,VIP,PABPC1,DHX9,THRAP3
Hsbp1		GO: Biological Process	GO:0070585	protein localization to mitochondrion		7.98e-05	0.4617	0.001609	0.01487	20	193	TIMM23,U2AF2,TIMM17A,AKT1,DNAJA1,HSP90AA1,NPEPPS,YWHAE,YWHAZ,PPP2R2B,DYNLL2,DYNLL1,HSPH1,TOMM20,TOMM70,AFG3L2,NMT1,DNM1L,NDUFA13,UBL5
Vps4a		GO: Biological Process	GO:0043393	regulation of protein binding		8.576e-05	0.4962	0.001711	0.01581	20	194	MEF2C,HNRNPK,ADD1,AES,FKBP1A,APLP2,APP,IFIT2,MAPRE1,ARRB1,CSNK1E,PRKACA,MAP1LC3B,SPAG9,TMBIM6,AKTIP,LRPAP1,FLOT1,CDC42,CRBN
Cyb5b		GO: Biological Process	GO:0048857	neural nucleus development		8.577e-05	0.4963	0.001711	0.01581	11	70	MBP,COX6B1,YWHAE,SIRT2,DYNLL1,ATP5PF,CACNA1A,CALM1,CALM2,SUDS3,CDC42
Cfdp1		GO: Biological Process	GO:0055117	regulation of cardiac muscle contraction		8.577e-05	0.4963	0.001711	0.01581	11	70	PDE4B,HSP90AA1,ANK2,PRKACA,ATP1A1,ATP1A2,ATP2A2,NOS1AP,SRI,CALM1,CALM2
Aplp2		GO: Biological Process	GO:0017158	regulation of calcium ion-dependent exocytosis		8.828e-05	0.5108	0.001755	0.01622	13	95	PFN2,RPH3A,ARF1,RAB3GAP1,NAPB,RIMS2,ATP2A2,PLCB1,SYN1,SYT1,CACNA1A,RAP1A,RAP1B
Thy1		GO: Biological Process	GO:0055086	nucleobase-containing small molecule metabolic process		8.887e-05	0.5142	0.001761	0.01627	52	763	GPHN,PDE4B,ACACA,PDE1B,PDHB,MAT2A,ADCY1,AK4,UQCRH,ALDOC,SULT4A1,ATP5PD,SLC25A23,HSPA8,CAP2,VCP,VIP,COX6A1,COX6B1,COX7C,CASK,GDA,ATP1A2,SNCA,PDE7B,ATP2B2,ATP5F1A,ATP5F1B,ATP5PF,AHCYL1,CHCHD10,NDUFA8,NDUFA9,NDUFB8,NDUFB9,NDUFS4,NDUFV2,DLD,DLG1,DLG4,DLST,PID1,CALM1,CALM2,DNM1L,ECE1,LDHB,NDUFA13,NUDT3,CYCS,ENO1,ATP6V0A2
Cadm1		GO: Biological Process	GO:0043161	proteasome-mediated ubiquitin-dependent protein catabolic process		9.098e-05	0.5264	0.001797	0.0166	32	393	HSP90B1,WAC,UBE2A,UBE2I,AKT1,SPOP,SDCBP,VCP,SEL1L,RNF44,APC,RNF7,SIRT2,ARRB1,CSNK1E,UBR3,SUMO2,CTNNB1,PSMC6,PSMD5,PSMD11,CCDC47,OS9,RBX1,TLK2,PCNP,COP1,KCTD17,BCAP31,RNF4,DYNC1LI1,CRBN
Bace1		GO: Biological Process	GO:0035307	positive regulation of protein dephosphorylation		9.215e-05	0.5332	0.001807	0.0167	9	48	MEF2C,PPP2CA,NSMF,PPP1R16B,GPLD1,CALM1,CALM2,SLC39A10,RPL5
Stt3a		GO: Biological Process	GO:0051452	intracellular pH reduction		9.215e-05	0.5332	0.001807	0.0167	9	48	SLC12A5,ATP6V1D,ATP6V1H,ATP6V0E2,ATP6V1C1,ATP6V1E1,ATP6V0B,ATP6V1G2,ATP6V0A2
Icam5		GO: Biological Process	GO:0032970	regulation of actin filament-based process		9.504e-05	0.5499	0.001858	0.01717	29	342	PDE4B,CFL1,PFN2,MEF2C,ADD1,MTPN,PREX1,SDC4,EZR,EVL,ANK2,ARF1,ARHGDIA,ATP1A1,ATP1A2,ATP2A2,NOS1AP,SPTAN1,SPTBN1,SRI,JMY,DLG1,GMFB,TAC1,RAC1,CAPZA2,GRB2,CIT,LRP1
Acsbg1		GO: Biological Process	GO:0034767	positive regulation of ion transmembrane transport		0.0001058	0.6123	0.002059	0.01903	17	152	ANK2,ANK3,ARF1,CASK,SNCA,NOS1AP,SRI,DBI,PLCB1,TESC,KIF5B,WNK2,ACSL6,CALM1,CALM2,THY1,CHP1
Ube2q2		GO: Biological Process	GO:0000086	G2/M transition of mitotic cell cycle		0.0001061	0.6137	0.002059	0.01903	20	197	CDK14,HSP90AA1,SYF2,APP,YWHAE,MAPRE1,CSNK1E,PRKACA,DYNLL1,BRSK1,ARPP19,TUBA1A,PLCB1,DYNC1H1,DYNC1I2,CALM1,CALM2,CIT,CCNG1,ENSA
Tspan3		GO: Biological Process	GO:0006120	mitochondrial electron transport, NADH to ubiquinone		0.000109	0.6306	0.002102	0.01942	9	49	SNCA,NDUFA8,NDUFA9,NDUFB8,NDUFB9,NDUFS4,NDUFV2,DLD,NDUFA13
Nptn		GO: Biological Process	GO:0035306	positive regulation of dephosphorylation		0.000109	0.6306	0.002102	0.01942	9	49	MEF2C,PPP2CA,NSMF,PPP1R16B,GPLD1,CALM1,CALM2,SLC39A10,RPL5
Elovl5		GO: Biological Process	GO:0051238	sequestering of metal ion		0.0001094	0.633	0.002103	0.01943	16	138	HSP90B1,FKBP1A,SLC25A23,ANK2,PRKACA,ATP1A2,SNCA,MYO5A,SRI,DBI,ITPR2,CALM1,CALM2,CALR,THY1,JPH3
Trip4		GO: Biological Process	GO:0050684	regulation of mRNA processing		0.0001178	0.6816	0.002257	0.02085	14	111	RBM10,U2AF2,HNRNPK,HSPA8,SRSF3,SRSF7,TNRC6C,PABPC1,AHCYL1,THRAP3,NPM1,TMBIM6,CELF3,UHMK1
Rpl4		GO: Biological Process	GO:0006942	regulation of striated muscle contraction		0.0001206	0.698	0.002304	0.02129	12	85	PDE4B,GRK2,HSP90AA1,ANK2,PRKACA,ATP1A1,ATP1A2,ATP2A2,NOS1AP,SRI,CALM1,CALM2
Dync1li1		GO: Biological Process	GO:1903532	positive regulation of secretion by cell		0.0001222	0.707	0.002323	0.02146	33	417	ABAT,HMGB1,SELENOK,CADM1,GRK2,FGFR1,SDC4,SDCBP,EZR,VSNL1,ARF1,RAB3GAP1,ARRB1,VPS35,PRKCZ,SNCA,ATP6AP1,VPS4A,SPTBN1,SRI,NCL,NELL2,PLCB1,SYT1,TAC1,KIF5B,GPLD1,RTN4,RAPGEF4,DNM1L,LAMP1,NCS1,OXCT1
Map4		GO: Biological Process	GO:0006417	regulation of translation		0.0001224	0.7084	0.002323	0.02146	29	347	ABCF1,RPS3,PAIP2,RPS5,MTPN,CIRBP,AKT1,QKI,TNRC6C,APP,PABPC1,NCOR2,CELF1,DROSHA,EIF5B,GIGYF2,EIF3H,PAIP2B,NPM1,CALR,PUM2,TRAP1,ZNF706,EIF4A2,UHMK1,EIF4G2,EIF5,EIF5A,RPL13A
Arpp21		GO: Biological Process	GO:0031110	regulation of microtubule polymerization or depolymerization		0.0001242	0.7188	0.002349	0.02171	10	61	MAP1A,MAPT,RPS3,SKA2,MID1IP1,APC,MAPRE1,GDA,SNCA,STMN2
Mobp		GO: Biological Process	GO:0032104	regulation of response to extracellular stimulus		0.0001251	0.7238	0.00235	0.02171	19	184	U2AF2,WAC,ATP6V1D,SPTLC2,RAB3GAP1,ATP6V1H,ATP6V0E2,VPS35,WDFY3,SNX5,ATP6V1C1,ATP6V1E1,ATP6V0B,ATP6V1G2,MAP1LC3B,RAB12,DNM1L,PAFAH1B2,ATP6V0A2
Pccb		GO: Biological Process	GO:0032107	regulation of response to nutrient levels		0.0001251	0.7238	0.00235	0.02171	19	184	U2AF2,WAC,ATP6V1D,SPTLC2,RAB3GAP1,ATP6V1H,ATP6V0E2,VPS35,WDFY3,SNX5,ATP6V1C1,ATP6V1E1,ATP6V0B,ATP6V1G2,MAP1LC3B,RAB12,DNM1L,PAFAH1B2,ATP6V0A2
Trak1		GO: Biological Process	GO:0010922	positive regulation of phosphatase activity		0.0001322	0.7647	0.002475	0.02287	7	30	MEF2C,PPP2CA,GPLD1,CALM1,CALM2,SLC39A10,RPL5
Rab6b		GO: Biological Process	GO:0034976	response to endoplasmic reticulum stress		0.0001385	0.8011	0.002584	0.02388	24	265	HSP90B1,MARCH6,ADD1,SELENOK,SPOP,SEC61A1,VCP,SEL1L,UFM1,ATP2A2,DNAJB11,PSMC6,TMX1,CCDC47,SERINC3,OS9,CALR,TMBIM6,PDIA3,CTDSP2,BCAP31,TMX4,SEC63,FLOT1
Manf		GO: Biological Process	GO:0042147	retrograde transport, endosome to Golgi		0.0001436	0.8311	0.002672	0.02469	11	74	CLTC,RAB6B,ARL1,VPS35,TMED9,SNX2,SNX5,RAB6A,VTI1A,SPAG9,STX6
Nicn1		GO: Biological Process	GO:0051235	maintenance of location		0.0001445	0.836	0.00268	0.02476	27	316	HSP90B1,AKT1,FKBP1A,SLC25A23,EZR,ANK2,ANK3,PRKACA,ATP1A2,SNCA,GAA,MXI1,MYO5A,SRI,DBI,MPRIP,ITPR2,VPS13A,OS9,CALM1,CALM2,CALR,SYNE1,PIP5K1C,PDIA3,THY1,JPH3
Ank2		GO: Biological Process	GO:0032070	regulation of deoxyribonuclease activity		0.0001476	0.8539	0.002728	0.02521	4	8	RPS3,HMGB1,AKT1,NPM1
Pebp1		GO: Biological Process	GO:0051279	regulation of release of sequestered calcium ion into cytosol		0.0001514	0.8759	0.002789	0.02578	12	87	FKBP1A,ANK2,PRKACA,ATP1A2,SNCA,MYO5A,SRI,DBI,CALM1,CALM2,THY1,JPH3
Fkbp1a		GO: Biological Process	GO:0086064	cell communication by electrical coupling involved in cardiac conduction		0.0001594	0.9223	0.002928	0.02706	6	22	PRKACA,ATP1A1,ATP1A2,SRI,CALM1,CALM2
Foxj3		GO: Biological Process	GO:0032272	negative regulation of protein polymerization		0.000164	0.9491	0.003003	0.02775	10	63	PFN2,ADD1,MTPN,EVL,MAPRE1,SNCA,SPTAN1,SPTBN1,CAPZA2,STMN2
Pygb		GO: Biological Process	GO:0086004	regulation of cardiac muscle cell contraction		0.0001649	0.9544	0.003011	0.02782	7	31	PDE4B,ANK2,ATP1A1,ATP1A2,ATP2A2,NOS1AP,SRI
Gas7		GO: Biological Process	GO:0002028	regulation of sodium ion transport		0.0001691	0.9784	0.003077	0.02843	12	88	AKT1,ANK3,ARF1,ATP1A1,ATP1A2,AHCYL1,PLCB1,DLG1,TESC,KIF5B,WNK2,CHP1
Atp1a1		GO: Biological Process	GO:0006875	cellular metal ion homeostasis		0.0001864	1	0.003382	0.03125	38	518	TPT1,HSP90B1,HMGB1,SLC22A17,FKBP1A,SLC25A23,ANK2,APLP2,APP,SLC40A1,ARF1,NPTN,PRKACA,ATP1A1,ATP1A2,SNCA,ATP2A2,ATP2B1,ATP2B2,MYO5A,SRI,DBI,ITPR2,DLG4,TAC1,TESC,CACNA1A,CALM1,CALM2,CALR,SLC39A10,TMBIM6,KCTD17,RMDN3,BCAP31,THY1,EIF5A,JPH3
Kctd17		GO: Biological Process	GO:0051494	negative regulation of cytoskeleton organization		0.0001876	1	0.003391	0.03134	15	130	MAP1A,PFN2,ADD1,MTPN,MID1IP1,EVL,APC,MAPRE1,SNCA,SPTAN1,SPTBN1,GMFB,NPM1,CAPZA2,STMN2
Atp6v0b		GO: Biological Process	GO:0016311	dephosphorylation		0.0001893	1	0.003413	0.03154	34	445	HSP90B1,ACP2,ZFYVE1,MEF2C,PPM1H,PPME1,FKBP1A,YWHAE,PPM1G,PPP1CC,PPP2CA,PPP2R2B,NSMF,PPP1R16B,ATP1A1,ARPP19,MPRIP,PTPRD,PTPRN2,PTPRZ1,PIP4P1,DLG1,GPLD1,CALM1,CALM2,SLC39A10,CTDSP2,MTMR6,RPRD1A,CYCS,SPRED1,ENSA,RPL5,CHP1
Snap91		GO: Biological Process	GO:0010769	regulation of cell morphogenesis involved in differentiation		0.000194	1	0.003486	0.03222	30	374	MAP2,MAPT,CFL1,MBP,CHN1,PREX1,SDCBP,PLXNB1,PPP2CA,ARHGDIA,NSMF,CTNNB1,RAB21,ZEB2,BMPR2,PTPRD,PTPRZ1,RAC1,CACNA1A,KALRN,CALR,CAMK2B,SYNE1,NTRK2,RTN4,CIT,THY1,EIF4G2,CDC42,RPL4
Myo6		GO: Biological Process	GO:0034764	positive regulation of transmembrane transport		0.0001983	1	0.003552	0.03282	17	160	ANK2,ANK3,ARF1,CASK,SNCA,NOS1AP,SRI,DBI,PLCB1,TESC,KIF5B,WNK2,ACSL6,CALM1,CALM2,THY1,CHP1
Cplx1		GO: Biological Process	GO:1902305	regulation of sodium ion transmembrane transport		0.0002043	1	0.003636	0.0336	9	53	ANK3,ARF1,ATP1A2,PLCB1,DLG1,TESC,KIF5B,WNK2,CHP1
Hacd3		GO: Biological Process	GO:0043113	receptor clustering		0.0002043	1	0.003636	0.0336	9	53	GPHN,ETV5,LRRTM4,PTN,GLRB,ARHGEF9,DLG1,DLG4,CACNA1A
Gabrb3		GO: Biological Process	GO:0010882	regulation of cardiac muscle contraction by calcium ion signaling		0.0002085	1	0.003701	0.0342	6	23	ANK2,PRKACA,ATP1A2,ATP2A2,CALM1,CALM2
Atp6v1h		GO: Biological Process	GO:0060291	long-term synaptic potentiation		0.000214	1	0.003787	0.035	10	65	PAIP2,HNRNPK,NPTN,PRKCZ,SNCA,DBI,PTN,NRGN,CAMK2B,NTRK2
Cct2		GO: Biological Process	GO:0042692	muscle cell differentiation		0.0002161	1	0.003813	0.03523	32	412	SPEG,ACTG1,MEF2C,MTPN,SORT1,MKL2,AKT1,QKI,SORBS2,ANK2,NEBL,MORF4L2,PRKAR1A,ANKRD17,CTNNB1,ATP2A2,MYH10,NACA,MYEF2,AFG3L2,PLCB1,KCNAB1,KRAS,CALR,SYNE1,SPAG9,CAV2,EIF5A,H3F3B,FLOT1,CDC42,EPAS1
Faah		GO: Biological Process	GO:1903047	mitotic cell cycle process		0.000219	1	0.003851	0.03558	59	931	TTYH1,MAP4,RPS3,CFL1,RPS6,SKA2,CDK14,UBE2I,CLTC,AKT1,FGFR1,HSP90AA1,ANK3,CHMP5,APC,SYF2,APP,ATF2,YWHAE,MAPRE1,PPP2CA,SIRT2,CSNK1E,PRKACA,ANKRD17,GIGYF2,DYNLL1,BRSK1,STAG2,MYH10,ARPP19,ATRX,VPS4A,SPTBN1,PSMC6,PSMD5,PSMD11,TUBA1A,PLCB1,DLG1,PID1,DYNC1H1,DYNC1I2,NPM1,PAPD5,CALM1,CALM2,CAMK2A,CAMK2B,CAV2,CIT,CTDSP2,CCNG1,PEBP1,DYNC1LI1,RPA1,CDC42,ENSA,RPL17
Nsf		GO: Biological Process	GO:0000041	transition metal ion transport		0.0002269	1	0.003979	0.03677	14	118	TTYH1,RAB11B,ATP6V1D,CLTC,SLC40A1,ATP6V1H,ATP6V0E2,ATP6V1C1,ATP6V1E1,ATP6V0B,ATP6V1G2,ATP6AP1,SLC39A10,ATP6V0A2
Snx2		GO: Biological Process	GO:0051047	positive regulation of secretion		0.0002332	1	0.004077	0.03767	34	450	ABAT,HMGB1,SELENOK,CADM1,GRK2,FGFR1,SDC4,SDCBP,EZR,VSNL1,ARF1,RAB3GAP1,ARRB1,VPS35,PRKCZ,SNCA,ATP6AP1,VPS4A,SPTBN1,SRI,NCL,NELL2,PLCB1,SYT1,TAC1,KIF5B,MAP1LC3B,GPLD1,RTN4,RAPGEF4,DNM1L,LAMP1,NCS1,OXCT1
Atp5h		GO: Biological Process	GO:0032388	positive regulation of intracellular transport		0.0002351	1	0.004098	0.03786	31	396	U2AF2,HSP90AA1,EZR,ANK3,NPEPPS,YWHAE,YWHAZ,ARF1,DYNLL2,PRKACA,DYNLL1,SNCA,RAB21,SRI,DBI,B3GAT3,BMPR1A,MLC1,KIF5B,DNM1,NMT1,CALM1,CALM2,CAMK4,KIF3A,BCAP31,UBL5,THY1,NUTF2,CDC42,CHP1
Myo5a		GO: Biological Process	GO:1903753	negative regulation of p38MAPK cascade		0.0002369	1	0.004116	0.03803	3	4	EZR,HSPH1,DLG1
Ppm1h		GO: Biological Process	GO:0002026	regulation of the force of heart contraction		0.0002502	1	0.004322	0.03993	7	33	GRK2,GLRX3,ATP1A1,ATP1A2,ATP2A2,GAA,PEBP1
Gpatch8		GO: Biological Process	GO:0031113	regulation of microtubule polymerization		0.0002502	1	0.004322	0.03993	7	33	MAPT,RPS3,APC,MAPRE1,GDA,SNCA,STMN2
Cacna1a		GO: Biological Process	GO:0034248	regulation of cellular amide metabolic process		0.0002552	1	0.004394	0.0406	30	380	ABCF1,RPS3,PAIP2,RPS5,MTPN,CIRBP,AKT1,QKI,TNRC6C,APP,PABPC1,NCOR2,CELF1,DROSHA,CSNK1E,EIF5B,GIGYF2,EIF3H,PAIP2B,NPM1,CALR,PUM2,TRAP1,ZNF706,EIF4A2,UHMK1,EIF4G2,EIF5,EIF5A,RPL13A
Tmx4		GO: Biological Process	GO:0007015	actin filament organization		0.0002589	1	0.004445	0.04107	28	345	HSP90B1,CFL1,PFN2,ADD1,MTPN,PREX1,SDC4,EZR,EVL,SORBS2,NEBL,GAS7,SORBS1,ARF1,ARRB1,SPTAN1,SPTBN1,JMY,DLG1,GMFB,TAC1,RAC1,CAPZA2,GRB2,CIT,TMSB4X,EMP2,CDC42
Nrip3		GO: Biological Process	GO:1901880	negative regulation of protein depolymerization		0.0002763	1	0.004715	0.04357	10	67	MAP1A,ADD1,MTPN,MID1IP1,EVL,APC,SPTAN1,SPTBN1,CAPZA2,STMN2
Pip5k1c		GO: Biological Process	GO:0007632	visual behavior		0.0002763	1	0.004715	0.04357	10	67	PDE1B,MEIS2,PPP1R1B,APP,SLC1A2,NPTN,ATP1A2,NDRG4,PTPRZ1,KRAS
Rnf44		GO: Biological Process	GO:0070838	divalent metal ion transport		0.000286	1	0.004867	0.04497	34	455	TPT1,PDE4B,SELENOK,FKBP1A,ANK2,SLC40A1,CASK,PPP2CA,PRKACA,TSPAN13,SARAF,CTNNB1,ATP1A2,SNCA,FYN,ATP2A2,ATP2B1,ATP2B2,NOS1AP,MYO5A,SRI,DBI,ITPR2,NIPA1,CACNA1A,CACNB1,CALM1,CALM2,CAMK2A,CAMK2B,SLC39A10,NCS1,THY1,JPH3
Atcay		GO: Biological Process	GO:0023014	signal transduction by protein phosphorylation		0.0002943	1	0.004984	0.04605	60	962	RPS3,HMGB1,MEF2C,KIDINS220,AKT1,FGFR1,DNAJA1,MAP4K4,CX3CL1,SDCBP,EZR,MAGED1,HACD3,APC,PPP2CA,NPTN,ARRB1,PRKCZ,CTNNB1,FYN,NDRG4,ZMYND11,ATP6AP1,PSAP,SPTAN1,SPTBN1,HSPH1,PSMC6,NCAM1,PSMD5,PSMD11,ZEB2,BMPR1A,BMPR2,PLCB1,DLG1,DLG4,WNK2,RBX1,KRAS,RAP1A,RAP1B,CALM1,CALM2,CAMK2A,CAMK2B,NTRK2,GRB2,RASGEF1A,SPAG9,CAV2,ECE1,RGS4,GSTP1,PEBP1,ATP6AP2,PAK2,SPRED1,CDC42,MAPK8IP2
Arhgap5		GO: Biological Process	GO:0090279	regulation of calcium ion import		0.0002954	1	0.004984	0.04605	14	121	FKBP1A,ANK2,CASK,PRKACA,CTNNB1,ATP1A2,SNCA,MYO5A,SRI,DBI,CALM1,CALM2,THY1,JPH3
Brsk1		GO: Biological Process	GO:0051282	regulation of sequestering of calcium ion		0.0002954	1	0.004984	0.04605	14	121	FKBP1A,SLC25A23,ANK2,PRKACA,ATP1A2,SNCA,MYO5A,SRI,DBI,ITPR2,CALM1,CALM2,THY1,JPH3
Rabgap1		GO: Biological Process	GO:0032410	negative regulation of transporter activity		0.0003127	1	0.005259	0.04859	10	68	FKBP1A,ANK3,PPP2CA,ATP1A2,SNCA,SRI,KCNAB1,CALM1,CALM2,GRK6
Prkx		GO: Biological Process	GO:0031400	negative regulation of protein modification process		0.000317	1	0.005317	0.04913	45	666	RPS3,ZFYVE1,PPP1R1B,LRRTM4,AKT1,DNAJA1,FKBP1A,EZR,TMEM59,OTUB1,APC,CHORDC1,YWHAE,PPP2CA,SIRT2,ARRB1,PPP1R16B,PRKAR1A,PRKCZ,CTNNB1,SNCA,FYN,ZMYND11,HSPH1,PSMC6,PSMD5,PSMD11,MPRIP,DLG1,GMFB,TESC,PID1,WNK2,NPM1,CALM1,CALM2,RGS4,CTDSP2,GSTP1,THY1,RNF4,PEBP1,PAK2,SPRED1,CHP1
Mlc1		GO: Biological Process	GO:0051098	regulation of binding		0.0003207	1	0.005363	0.04955	27	332	HMGB1,MEF2C,HNRNPK,ADD1,AES,FKBP1A,APLP2,APP,IFIT2,MAPRE1,SIRT2,ARRB1,CSNK1E,PRKACA,CTNNB1,SRI,MAP1LC3B,CALM1,CALM2,SPAG9,TMBIM6,AKTIP,LRPAP1,FLOT1,CDC42,ENO1,CRBN
Ids		GO: Biological Process	GO:0072507	divalent inorganic cation homeostasis		0.0003225	1	0.005363	0.04955	34	458	TPT1,HSP90B1,HMGB1,FKBP1A,SLC25A23,ANK2,ANK3,APP,NPTN,PRKACA,ATP1A2,SNCA,ATP2A2,ATP2B1,ATP2B2,MYO5A,SRI,DBI,ITPR2,CCDC47,DLG4,TAC1,CACNA1A,CALM1,CALM2,CALR,SLC39A10,TMBIM6,KCTD17,RMDN3,BCAP31,THY1,EIF5A,JPH3
Syt1		GO: Biological Process	GO:0072511	divalent inorganic cation transport		0.0003225	1	0.005363	0.04955	34	458	TPT1,PDE4B,SELENOK,FKBP1A,ANK2,SLC40A1,CASK,PPP2CA,PRKACA,TSPAN13,SARAF,CTNNB1,ATP1A2,SNCA,FYN,ATP2A2,ATP2B1,ATP2B2,NOS1AP,MYO5A,SRI,DBI,ITPR2,NIPA1,CACNA1A,CACNB1,CALM1,CALM2,CAMK2A,CAMK2B,SLC39A10,NCS1,THY1,JPH3
Aldh5a1		GO: Biological Process	GO:0007265	Ras protein signal transduction		0.0003363	1	0.005575	0.05152	27	333	CFL1,CYTH2,PREX1,SDCBP,HACD3,ARHGAP5,ARHGDIA,ARRB1,SSX2IP,ARHGAP42,ARHGAP32,ARPP19,PSD,ARHGEF9,RAC1,KRAS,RALGDS,RAP1A,RAP1B,KALRN,PSD3,GRB2,RASGEF1A,G3BP1,NISCH,FLOT1,SPATA13
Tmem55b		GO: Biological Process	GO:0010770	positive regulation of cell morphogenesis involved in differentiation		0.000341	1	0.005638	0.0521	18	183	MAPT,PREX1,SDCBP,PLXNB1,ARHGDIA,CTNNB1,RAB21,ZEB2,BMPR2,PTPRD,RAC1,KALRN,CALR,CAMK2B,NTRK2,EIF4G2,CDC42,RPL4
Tmem63b		GO: Biological Process	GO:0006816	calcium ion transport		0.0003472	1	0.005723	0.05288	31	405	TPT1,PDE4B,SELENOK,FKBP1A,ANK2,CASK,PPP2CA,PRKACA,TSPAN13,SARAF,CTNNB1,ATP1A2,SNCA,FYN,ATP2A2,ATP2B1,ATP2B2,NOS1AP,MYO5A,SRI,DBI,ITPR2,CACNA1A,CACNB1,CALM1,CALM2,CAMK2A,CAMK2B,NCS1,THY1,JPH3
Fmnl2		GO: Biological Process	GO:0006892	post-Golgi vesicle-mediated transport		0.0003502	1	0.005757	0.0532	12	95	SORT1,ANK3,SCAMP1,RAB14,ARF1,VAMP4,MYO5A,SPTBN1,VPS13A,NSF,LAMP1,VTI1A
Phf24		GO: Biological Process	GO:0006839	mitochondrial transport		0.0003512	1	0.005757	0.0532	24	282	ACACA,TIMM23,U2AF2,TIMM17A,ATP5PD,HSP90AA1,NPEPPS,ATF2,YWHAE,YWHAZ,PPP2R2B,DYNLL2,DYNLL1,ATP5F1A,ATP5F1B,ATP5PF,TOMM20,TOMM70,AFG3L2,KIF5B,NMT1,CAMK2A,NDUFA13,UBL5
Arl5a		GO: Biological Process	GO:0051261	protein depolymerization		0.0003572	1	0.005838	0.05395	13	109	MAP1A,CFL1,ADD1,MTPN,MID1IP1,HSPA8,EVL,APC,VPS4A,SPTAN1,SPTBN1,CAPZA2,STMN2
Rab3gap1		GO: Biological Process	GO:0055065	metal ion homeostasis		0.0003646	1	0.005943	0.05492	41	593	TPT1,HSP90B1,HMGB1,SLC22A17,FKBP1A,SLC25A23,ANK2,ANK3,APLP2,APP,SLC40A1,ARF1,NPTN,PRKACA,ATP1A1,ATP1A2,SNCA,ATP2A2,ATP2B1,ATP2B2,MYO5A,SRI,DBI,ITPR2,CCDC47,DLG4,TAC1,TESC,CACNA1A,CALM1,CALM2,CALR,SLC39A10,TMBIM6,KCTD17,RMDN3,BCAP31,THY1,EIF5A,EPAS1,JPH3
Ndufa13		GO: Biological Process	GO:0070296	sarcoplasmic reticulum calcium ion transport		0.0003678	1	0.005978	0.05524	7	35	ANK2,PRKACA,ATP1A2,ATP2A2,SRI,CALM1,CALM2
BC031181		GO: Biological Process	GO:0055074	calcium ion homeostasis		0.0003744	1	0.006068	0.05607	32	425	TPT1,HSP90B1,HMGB1,FKBP1A,SLC25A23,ANK2,APP,NPTN,PRKACA,ATP1A2,SNCA,ATP2A2,ATP2B1,ATP2B2,MYO5A,SRI,DBI,ITPR2,CCDC47,DLG4,TAC1,CACNA1A,CALM1,CALM2,CALR,TMBIM6,KCTD17,RMDN3,BCAP31,THY1,EIF5A,JPH3
Kidins220		GO: Biological Process	GO:0001933	negative regulation of protein phosphorylation		0.0003901	1	0.006304	0.05825	32	426	PPP1R1B,LRRTM4,AKT1,DNAJA1,FKBP1A,EZR,APC,CHORDC1,PPP2CA,SIRT2,ARRB1,PRKAR1A,PRKCZ,SNCA,ZMYND11,HSPH1,DLG1,GMFB,TESC,PID1,WNK2,NPM1,CALM1,CALM2,RGS4,CTDSP2,GSTP1,THY1,PEBP1,PAK2,SPRED1,CHP1
Gng12		GO: Biological Process	GO:0043242	negative regulation of protein complex disassembly		0.0003975	1	0.006406	0.0592	10	70	MAP1A,ADD1,MTPN,MID1IP1,EVL,APC,SPTAN1,SPTBN1,CAPZA2,STMN2
Calm2		GO: Biological Process	GO:0035249	synaptic transmission, glutamatergic		0.0004026	1	0.006452	0.05962	11	83	MEF2C,RAB3GAP1,NAPB,PRKACA,ATP1A2,CLSTN3,SYT1,CACNA1A,KALRN,NTRK2,MAPK8IP2
Arhgap26		GO: Biological Process	GO:1901879	regulation of protein depolymerization		0.0004026	1	0.006452	0.05962	11	83	MAP1A,CFL1,ADD1,MTPN,MID1IP1,EVL,APC,SPTAN1,SPTBN1,CAPZA2,STMN2
Ndrg4		GO: Biological Process	GO:0043244	regulation of protein complex disassembly		0.0004252	1	0.006797	0.0628	12	97	MAP1A,CFL1,ADD1,MTPN,MID1IP1,EVL,APC,SPTAN1,SPTBN1,CAPZA2,STMN2,EIF5A
Tbc1d9b		GO: Biological Process	GO:0023058	adaptation of signaling pathway		0.0004299	1	0.006797	0.0628	6	26	GRK2,ARRB1,DNM1,CAMK2B,GRK6,RDH11
Ttll7		GO: Biological Process	GO:0071709	membrane assembly		0.0004299	1	0.006797	0.0628	6	26	ANK3,SPTBN1,PTPRD,CAV2,EMP2,FLOT1
Cox6b1		GO: Biological Process	GO:1901020	negative regulation of calcium ion transmembrane transporter activity		0.0004299	1	0.006797	0.0628	6	26	FKBP1A,PPP2CA,ATP1A2,SRI,CALM1,CALM2
Papd5		GO: Biological Process	GO:0045822	negative regulation of heart contraction		0.0004299	1	0.006797	0.0628	6	26	GRK2,ATP1A1,ATP1A2,ATP2A2,SRI,TAC1
Dpp10		GO: Biological Process	GO:0001881	receptor recycling		0.0004412	1	0.006956	0.06428	7	36	RAB11B,CHMP5,NSG1,SNCA,NSF,GRIA3,ECE1
Ssx2ip		GO: Biological Process	GO:0006874	cellular calcium ion homeostasis		0.0004461	1	0.007002	0.06471	31	411	TPT1,HSP90B1,HMGB1,FKBP1A,SLC25A23,ANK2,APP,NPTN,PRKACA,ATP1A2,SNCA,ATP2A2,ATP2B1,ATP2B2,MYO5A,SRI,DBI,ITPR2,DLG4,TAC1,CACNA1A,CALM1,CALM2,CALR,TMBIM6,KCTD17,RMDN3,BCAP31,THY1,EIF5A,JPH3
Zfp39		GO: Biological Process	GO:0048024	regulation of mRNA splicing, via spliceosome		0.0004466	1	0.007002	0.06471	10	71	RBM10,U2AF2,HNRNPK,HSPA8,SRSF3,SRSF7,THRAP3,NPM1,CELF3,UHMK1
Paip2		GO: Biological Process	GO:0032413	negative regulation of ion transmembrane transporter activity		0.0004693	1	0.007319	0.06763	9	59	FKBP1A,ANK3,PPP2CA,ATP1A2,SRI,KCNAB1,CALM1,CALM2,GRK6
Sep15		GO: Biological Process	GO:0042273	ribosomal large subunit biogenesis		0.0004693	1	0.007319	0.06763	9	59	RPL35A,RPL7L1,NPM1,RPL3,RPL5,RPL6,RPL7A,RPL11,RPL12
Psd		GO: Biological Process	GO:0072655	establishment of protein localization to mitochondrion		0.0004726	1	0.007351	0.06793	18	188	TIMM23,U2AF2,TIMM17A,AKT1,HSP90AA1,NPEPPS,YWHAE,YWHAZ,PPP2R2B,DYNLL2,DYNLL1,HSPH1,TOMM20,TOMM70,AFG3L2,NMT1,NDUFA13,UBL5
E330009J07Rik		GO: Biological Process	GO:0070588	calcium ion transmembrane transport		0.0004807	1	0.007457	0.0689	23	271	PDE4B,FKBP1A,ANK2,PPP2CA,PRKACA,TSPAN13,ATP1A2,SNCA,ATP2A2,ATP2B1,ATP2B2,NOS1AP,MYO5A,SRI,DBI,ITPR2,CACNA1A,CACNB1,CALM1,CALM2,NCS1,THY1,JPH3
Syn1		GO: Biological Process	GO:0032535	regulation of cellular component size		0.0004914	1	0.007602	0.07024	29	377	MAPT,CFL1,PFN2,ADD1,MTPN,AKT1,PREX1,HSP90AA1,EZR,EVL,ARF1,ARHGAP5,RAB21,ATP2B2,SPTAN1,SPTBN1,RAP1GAP2,JMY,BMPR2,DLG1,GMFB,RAC1,NPM1,RTN4,CAPZA2,GRB2,CIT,EIF4G2,RPL4
Mxd4		GO: Biological Process	GO:0050848	regulation of calcium-mediated signaling		0.0004955	1	0.007626	0.07046	11	85	SELENOK,FKBP1A,PRKACA,NFAT5,MYO5A,SRI,NCAM1,CALM1,CALM2,JPH3,CHP1
Dzank1		GO: Biological Process	GO:0048259	regulation of receptor-mediated endocytosis		0.0004955	1	0.007626	0.07046	11	85	HNRNPK,SDCBP,ARF1,ARRB1,RAB21,SNAP91,DLG4,RAC1,SYNE1,KIF3A,FLOT1
Slc9a7		GO: Biological Process	GO:0009991	response to extracellular stimulus		0.0005042	1	0.007738	0.07151	42	622	MAPT,PENK,GABARAP,U2AF2,RPS19,ZFYVE1,WAC,AES,ATP6V1D,AKT1,NOCT,USF2,HSPA8,VLDLR,SPTLC2,SLC1A2,RAB3GAP1,SIRT2,ATP6V1H,ATP6V0E2,VPS35,WDFY3,ATP2B1,SNX5,ATP6V1C1,ATP6V1E1,ATP6V0B,ATP6V1G2,MAP1LC3A,PTN,BMPR2,PCSK1N,MAP1LC3B,RAB12,DNM1L,PDIA3,GSTP1,OXCT1,FSTL1,PAFAH1B2,ENSA,ATP6V0A2
Rims2		GO: Biological Process	GO:0006754	ATP biosynthetic process		0.0005228	1	0.007997	0.0739	8	48	ATP5PD,VCP,ATP5F1A,ATP5F1B,ATP5PF,CHCHD10,PID1,ATP6V0A2
Atp8a1		GO: Biological Process	GO:0071871	response to epinephrine		0.0005238	1	0.007997	0.0739	5	18	PDE4B,PENK,SIRT2,PRKACA,SNCA
Limch1		GO: Biological Process	GO:1903115	regulation of actin filament-based movement		0.0005259	1	0.008007	0.07399	7	37	PDE4B,ANK2,ATP1A1,ATP1A2,ATP2A2,NOS1AP,SRI
Eef1a1		GO: Biological Process	GO:0010880	regulation of release of sequestered calcium ion into cytosol by sarcoplasmic reticulum		0.0005345	1	0.008054	0.07442	6	27	ANK2,PRKACA,ATP1A2,SRI,CALM1,CALM2
Ppp1r16b		GO: Biological Process	GO:0001919	regulation of receptor recycling		0.0005345	1	0.008054	0.07442	6	27	CHMP5,NSG1,SNCA,NSF,GRIA3,ECE1
Smim14		GO: Biological Process	GO:1901385	regulation of voltage-gated calcium channel activity		0.0005345	1	0.008054	0.07442	6	27	PDE4B,NOS1AP,SRI,CACNB1,CALM1,CALM2
Wnk2		GO: Biological Process	GO:0060314	regulation of ryanodine-sensitive calcium-release channel activity		0.0005345	1	0.008054	0.07442	6	27	FKBP1A,PRKACA,SRI,CALM1,CALM2,JPH3
Hpf1		GO: Biological Process	GO:0001649	osteoblast differentiation		0.0005494	1	0.008256	0.07629	20	223	PENK,RPS15,MEF2C,MEF2D,FASN,CLTC,AKT1,FGFR1,NOCT,APC,PRKACA,CTNNB1,ATP5F1B,ATP6AP1,DHX9,BMPR1A,BMPR2,CCDC47,TMSB4X,H3F3B
Fam120a		GO: Biological Process	GO:0045597	positive regulation of cell differentiation		0.000559	1	0.008346	0.07712	59	966	MAPT,ETV5,HMGB1,MEF2C,HNRNPK,KIDINS220,NEGR1,AKT1,FGFR1,NOCT,QKI,CX3CL1,PREX1,SDCBP,PLXNB1,HSP90AA1,VLDLR,APC,CPNE5,ARF1,ARHGDIA,NPTN,SIRT2,NSMF,MORF4L2,PRKCZ,CTNNB1,RAB21,RIMS2,FYN,NDRG4,ATP6AP1,ZEB2,PTN,BMPR1A,BMPR2,PTPRD,PTPRZ1,PLCB1,SYT1,TESC,RAC1,ACSL6,TCF4,RAP1A,KALRN,CALR,CAMK2B,NTRK2,RTN4,STMN2,SPAG9,EEF1A1,THRB,EIF4G2,EIF5A,FLOT1,CDC42,RPL4
Rapgefl1		GO: Biological Process	GO:0072503	cellular divalent inorganic cation homeostasis		0.000559	1	0.008346	0.07712	32	435	TPT1,HSP90B1,HMGB1,FKBP1A,SLC25A23,ANK2,APP,NPTN,PRKACA,ATP1A2,SNCA,ATP2A2,ATP2B1,ATP2B2,MYO5A,SRI,DBI,ITPR2,DLG4,TAC1,CACNA1A,CALM1,CALM2,CALR,SLC39A10,TMBIM6,KCTD17,RMDN3,BCAP31,THY1,EIF5A,JPH3
Atp6v0a2		GO: Biological Process	GO:0022406	membrane docking		0.00056	1	0.008346	0.07712	10	73	STX7,EZR,NDRG4,SNPH,NCAM1,SYT1,NSF,CAV2,STX6,CHP1
Camk4		GO: Biological Process	GO:0044772	mitotic cell cycle phase transition		0.0005611	1	0.008346	0.07712	37	529	RPS6,CDK14,AKT1,HSP90AA1,APC,SYF2,APP,YWHAE,MAPRE1,SIRT2,CSNK1E,PRKACA,ANKRD17,GIGYF2,DYNLL1,BRSK1,ARPP19,PSMC6,PSMD5,PSMD11,TUBA1A,PLCB1,PID1,DYNC1H1,DYNC1I2,NPM1,CALM1,CALM2,CAMK2A,CAMK2B,CIT,CTDSP2,CCNG1,DYNC1LI1,RPA1,ENSA,RPL17
Tmem181a		GO: Biological Process	GO:0043488	regulation of mRNA stability		0.0005699	1	0.008455	0.07813	15	144	RBM10,CIRBP,AKT1,NOCT,QKI,HSPA8,VIP,PABPC1,YWHAZ,PSMC6,PSMD5,PSMD11,DHX9,THRAP3,PUM2
Pcp4l1		GO: Biological Process	GO:0032417	positive regulation of sodium:proton antiporter activity		0.0005745	1	0.00848	0.07836	3	5	PLCB1,TESC,CHP1
Mllt6		GO: Biological Process	GO:0009448	gamma-aminobutyric acid metabolic process		0.0005745	1	0.00848	0.07836	3	5	ABAT,GAD1,ALDH5A1
Nos1ap		GO: Biological Process	GO:0032273	positive regulation of protein polymerization		0.0006016	1	0.008858	0.08185	13	115	MAPT,RPS3,PFN2,EVL,APC,ARF1,GDA,JMY,DLG1,GMFB,RAC1,TPPP,GRB2
Cdk19		GO: Biological Process	GO:0000165	MAPK cascade		0.0006041	1	0.008872	0.08198	57	928	RPS3,HMGB1,MEF2C,KIDINS220,AKT1,FGFR1,DNAJA1,MAP4K4,CX3CL1,SDCBP,EZR,MAGED1,HACD3,APC,PPP2CA,NPTN,ARRB1,PRKCZ,CTNNB1,FYN,NDRG4,ZMYND11,ATP6AP1,PSAP,SPTAN1,SPTBN1,HSPH1,PSMC6,NCAM1,PSMD5,PSMD11,ZEB2,PLCB1,DLG1,DLG4,WNK2,RBX1,KRAS,RAP1A,RAP1B,CALM1,CALM2,CAMK2A,CAMK2B,NTRK2,GRB2,RASGEF1A,SPAG9,CAV2,ECE1,RGS4,GSTP1,PEBP1,ATP6AP2,SPRED1,CDC42,MAPK8IP2
Otud7b		GO: Biological Process	GO:0034766	negative regulation of ion transmembrane transport		0.0006058	1	0.008875	0.08201	11	87	AKT1,FKBP1A,ANK3,PPP2CA,ATP1A2,SRI,KCNAB1,CALM1,CALM2,GRK6,CRBN
Tbkbp1		GO: Biological Process	GO:0061025	membrane fusion		0.0006153	1	0.008964	0.08283	20	225	RABGAP1,STX7,RPH3A,NAPB,VAMP4,TBC1D9B,SNPH,VPS4A,AFG3L2,VAMP1,SYT1,KIF5B,PID1,NSF,DNM1L,VTI1A,CAV2,RABEP1,STX6,CHP1
Rgs4		GO: Biological Process	GO:0007030	Golgi organization		0.0006164	1	0.008964	0.08283	12	101	CLTC,YWHAZ,ARL1,TMED9,VAMP4,MYO5A,VMP1,SYNE1,VTI1A,CIT,CDC42,STX6
Ensa		GO: Biological Process	GO:1903311	regulation of mRNA metabolic process		0.0006166	1	0.008964	0.08283	14	130	RBM10,U2AF2,HNRNPK,HSPA8,SRSF3,SRSF7,TNRC6C,PABPC1,AHCYL1,THRAP3,NPM1,TMBIM6,CELF3,UHMK1
Fam103a1		GO: Biological Process	GO:0006105	succinate metabolic process		0.0006327	1	0.009152	0.08457	4	11	SDHA,GAD1,SUCLA2,ALDH5A1
Abcf1		GO: Biological Process	GO:0072578	neurotransmitter-gated ion channel clustering		0.0006327	1	0.009152	0.08457	4	11	GPHN,LRRTM4,GLRB,DLG4
Rap1gap2		GO: Biological Process	GO:0021537	telencephalon development		0.0006581	1	0.009495	0.08774	22	260	HNRNPK,FGFR1,VLDLR,SLC1A2,YWHAE,NCOR2,RNF7,CTNNB1,MYH10,DBI,ZEB2,NRP2,GNG12,PTPRZ1,PLCB1,RAC1,AGTPBP1,NRGN,NTRK2,RTN4,KIF3A,LRP1
Rpl12		GO: Biological Process	GO:0061337	cardiac conduction		0.0006659	1	0.009561	0.08835	14	131	ANK2,YWHAE,PRKACA,ATP1A1,ATP1A2,ATP2A2,ATP2B1,ATP2B2,AHCYL1,SRI,ITPR2,CACNB1,CALM1,CALM2
Sccpdh		GO: Biological Process	GO:0010469	regulation of signaling receptor activity		0.0006659	1	0.009561	0.08835	14	131	MEF2C,UBE2I,FKBP1A,APLP2,APP,PPP2CA,PRKACA,MYO5A,SRI,DLG4,CALM1,CALM2,MAPK8IP2,JPH3
Rps21		GO: Biological Process	GO:0008542	visual learning		0.0006822	1	0.00977	0.09028	9	62	PDE1B,MEIS2,PPP1R1B,APP,NPTN,ATP1A2,NDRG4,PTPRZ1,KRAS
March6		GO: Biological Process	GO:0010881	regulation of cardiac muscle contraction by regulation of the release of sequestered calcium ion		0.000688	1	0.009781	0.09038	5	19	ANK2,PRKACA,ATP1A2,CALM1,CALM2
Nrn1		GO: Biological Process	GO:0009068	aspartate family amino acid catabolic process		0.000688	1	0.009781	0.09038	5	19	ASRGL1,DLD,DLST,GOT1,GOT2
Lgi2		GO: Biological Process	GO:0050849	negative regulation of calcium-mediated signaling		0.000688	1	0.009781	0.09038	5	19	FKBP1A,SRI,CALM1,CALM2,CHP1
Prrc2b		GO: Biological Process	GO:0007528	neuromuscular junction development		0.0006941	1	0.009843	0.09095	8	50	GPHN,ETV5,ANK3,APP,PTN,AFG3L2,CACNB1,NTRK2
Pcsk1n		GO: Biological Process	GO:0051495	positive regulation of cytoskeleton organization		0.0007292	1	0.01026	0.09484	18	195	MAPT,RPS3,CFL1,PFN2,SDC4,EVL,APC,ARF1,GDA,SIRT2,JMY,DLG1,GMFB,TAC1,RAC1,NPM1,STMN2,GRB2
Atp6v0e2		GO: Biological Process	GO:0019722	calcium-mediated signaling		0.0007301	1	0.01026	0.09484	16	163	SELENOK,FKBP1A,ANK2,PRKACA,ATP1A2,NFAT5,ATP2A2,MYO5A,SRI,NCAM1,CALM1,CALM2,NTRK2,BCAP31,JPH3,CHP1
Zdhhc2		GO: Biological Process	GO:1904377	positive regulation of protein localization to cell periphery		0.0007337	1	0.01026	0.09484	7	39	AKT1,EZR,DPP10,SORBS1,SPTBN1,DLG1,KIF5B
Ncam1		GO: Biological Process	GO:1903078	positive regulation of protein localization to plasma membrane		0.0007337	1	0.01026	0.09484	7	39	AKT1,EZR,DPP10,SORBS1,SPTBN1,DLG1,KIF5B
Ubald1		GO: Biological Process	GO:0031623	receptor internalization		0.0007359	1	0.01026	0.09484	11	89	GRK2,CLTC,SDCBP,EZR,ARF1,ARRB1,SNCA,DLG4,DNM1,GRB2,FLOT1
Prex1		GO: Biological Process	GO:0070509	calcium ion import		0.0007361	1	0.01026	0.09484	17	179	FKBP1A,ANK2,CASK,PRKACA,CTNNB1,ATP1A2,SNCA,ATP2A2,MYO5A,SRI,DBI,ITPR2,CACNA1A,CALM1,CALM2,THY1,JPH3
Ipo8		GO: Biological Process	GO:0007006	mitochondrial membrane organization		0.0007362	1	0.01026	0.09484	12	103	HSP90AA1,ATF2,YWHAE,YWHAZ,DYNLL2,DYNLL1,SNCA,TOMM20,AFG3L2,NMT1,CAMK2A,NDUFA13
Negr1		GO: Biological Process	GO:0008015	blood circulation		0.0007593	1	0.01052	0.09716	38	557	ABAT,PDE4B,GRK2,AKT1,CX3CL1,HSP90AA1,VIP,ANK2,GLRX3,SLC1A1,YWHAE,PRKACA,ATP1A1,ATP1A2,ATP2A2,ATP2B1,ATP2B2,GAA,NOS1AP,ARHGAP42,AHCYL1,SRI,ITPR2,BMPR2,MANF,TAC1,CACNB1,CALM1,CALM2,DNM1L,ECE1,THRB,PEBP1,ATP6AP2,NISCH,EMP2,CDC42,EPAS1
Lrp1		GO: Biological Process	GO:0008360	regulation of cell shape		0.0007596	1	0.01052	0.09716	15	148	CFDP1,PLXNB1,EZR,GAS7,ARHGDIA,CSNK1E,PARVA,FYN,MYH10,MYO10,PTN,CDC42SE2,DLG1,KIF3A,EPB41L2
Plekha1		GO: Biological Process	GO:0043487	regulation of RNA stability		0.0007596	1	0.01052	0.09716	15	148	RBM10,CIRBP,AKT1,NOCT,QKI,HSPA8,VIP,PABPC1,YWHAZ,PSMC6,PSMD5,PSMD11,DHX9,THRAP3,PUM2
Dtx3		GO: Biological Process	GO:1900034	regulation of cellular response to heat		0.0007739	1	0.01069	0.09875	10	76	HSBP1,HSPA8,HSP90AA1,CHORDC1,YWHAE,HSPH1,CAMK2A,CAMK2B,DNAJB6,RPA1
Cdh18		GO: Biological Process	GO:0035264	multicellular organism growth		0.0007839	1	0.0108	0.09979	17	180	ADD1,SLC12A5,EZR,APP,SLC1A2,CELF1,GIGYF2,KDM2A,LGMN,ATRX,DHCR7,AFG3L2,DLG1,SLC4A10,PLEKHA1,H3F3B,CDC42
Rprd1a		GO: Biological Process	GO:1903335	regulation of vacuolar transport		0.0008021	1	0.01095	0.1011	6	29	RAB11B,EZR,ARF1,VPS35,RAB21,NDRG4
Os9		GO: Biological Process	GO:0050690	regulation of defense response to virus by virus		0.0008021	1	0.01095	0.1011	6	29	AP2M1,ARF1,ATP6V1H,FYN,RAC1,PAK2
Otud6b		GO: Biological Process	GO:0006099	tricarboxylic acid cycle		0.0008021	1	0.01095	0.1011	6	29	PDHB,ACO2,SDHA,SUCLA2,DLD,DLST
Kazn		GO: Biological Process	GO:0035640	exploration behavior		0.0008021	1	0.01095	0.1011	6	29	ABAT,PENK,GAD1,DLG4,SLC4A10,JPH3
Ildr2		GO: Biological Process	GO:0003013	circulatory system process		0.0008387	1	0.01142	0.1055	38	560	ABAT,PDE4B,GRK2,AKT1,CX3CL1,HSP90AA1,VIP,ANK2,GLRX3,SLC1A1,YWHAE,PRKACA,ATP1A1,ATP1A2,ATP2A2,ATP2B1,ATP2B2,GAA,NOS1AP,ARHGAP42,AHCYL1,SRI,ITPR2,BMPR2,MANF,TAC1,CACNB1,CALM1,CALM2,DNM1L,ECE1,THRB,PEBP1,ATP6AP2,NISCH,EMP2,CDC42,EPAS1
Camta2		GO: Biological Process	GO:0030073	insulin secretion		0.0008557	1	0.01162	0.1074	20	231	RAB11B,ABAT,MAP4K4,VSNL1,ARRB1,RIMS2,ILDR2,MYO5A,SRI,CPLX1,ITPR2,PTPRN2,KIF5B,CACNA1A,GPLD1,RAP1A,PCLO,RAPGEF4,OXCT1,ENSA
Rfwd2		GO: Biological Process	GO:2001233	regulation of apoptotic signaling pathway		0.0008606	1	0.01166	0.1078	30	409	TPT1,RPS3,HNRNPK,AKT1,FGFR1,SPOP,CX3CL1,SFPQ,MAGED1,EI24,YWHAE,YWHAZ,DYNLL2,DYNLL1,CTNNB1,FYN,ZMYND11,HSPH1,SERINC3,ITM2C,NMT1,CAMK2B,DNM1L,TMBIM6,PDIA3,GSTP1,NDUFA13,TRAP1,BCAP31,PAK2
Rps19		GO: Biological Process	GO:0034504	protein localization to nucleus		0.0008768	1	0.01185	0.1095	29	391	CFL1,RPL23,AKT1,HSPA8,HSP90AA1,IPO8,CCT2,PPP2CA,RGS20,IPO9,CCT5,CTNNB1,FYN,TOR1AIP1,MXI1,SPTBN1,SRI,OTUD7B,BMPR1A,NPM1,CALR,SYNE1,DNAJB6,CAV2,PDIA3,NUTF2,DCLK1,RPL11,CHP1
Ghitm		GO: Biological Process	GO:0051283	negative regulation of sequestering of calcium ion		0.0009014	1	0.01213	0.1121	13	120	FKBP1A,ANK2,PRKACA,ATP1A2,SNCA,MYO5A,SRI,DBI,ITPR2,CALM1,CALM2,THY1,JPH3
Arhgap32		GO: Biological Process	GO:0051209	release of sequestered calcium ion into cytosol		0.0009014	1	0.01213	0.1121	13	120	FKBP1A,ANK2,PRKACA,ATP1A2,SNCA,MYO5A,SRI,DBI,ITPR2,CALM1,CALM2,THY1,JPH3
Camsap2		GO: Biological Process	GO:0061077	chaperone-mediated protein folding		0.0009079	1	0.01219	0.1126	8	52	FKBP1A,HSPA8,CCT2,CHORDC1,HSPH1,CALR,DNAJB6,TRAP1
Sepw1		GO: Biological Process	GO:0060315	negative regulation of ryanodine-sensitive calcium-release channel activity		0.0009195	1	0.01232	0.1138	4	12	FKBP1A,SRI,CALM1,CALM2
Mbp		GO: Biological Process	GO:0010522	regulation of calcium ion transport into cytosol		0.0009519	1	0.01272	0.1175	12	106	FKBP1A,ANK2,PRKACA,ATP1A2,SNCA,MYO5A,SRI,DBI,CALM1,CALM2,THY1,JPH3
Cox6a1		GO: Biological Process	GO:0014808	release of sequestered calcium ion into cytosol by sarcoplasmic reticulum		0.0009695	1	0.01287	0.1189	6	30	ANK2,PRKACA,ATP1A2,SRI,CALM1,CALM2
Pi4ka		GO: Biological Process	GO:0042133	neurotransmitter metabolic process		0.0009695	1	0.01287	0.1189	6	30	ABAT,GAD1,ALDH5A1,AGTPBP1,CACNA1A,PEBP1
Coq5		GO: Biological Process	GO:1903514	release of sequestered calcium ion into cytosol by endoplasmic reticulum		0.0009695	1	0.01287	0.1189	6	30	ANK2,PRKACA,ATP1A2,SRI,CALM1,CALM2
Ipo9		GO: Biological Process	GO:0008306	associative learning		0.0009738	1	0.01287	0.1189	11	92	PDE1B,MEIS2,PPP1R1B,APP,NPTN,ATP1A2,NDRG4,PTPRZ1,TAC1,KRAS,NRGN
Dmtf1		GO: Biological Process	GO:0021987	cerebral cortex development		0.0009744	1	0.01287	0.1189	13	121	HNRNPK,FGFR1,VLDLR,YWHAE,RNF7,CTNNB1,NRP2,GNG12,PLCB1,RAC1,NTRK2,RTN4,LRP1
Ubap2l		GO: Biological Process	GO:0008064	regulation of actin polymerization or depolymerization		0.001011	1	0.01332	0.1231	16	168	CFL1,PFN2,ADD1,MTPN,PREX1,EVL,ARF1,SPTAN1,SPTBN1,JMY,DLG1,GMFB,RAC1,CAPZA2,GRB2,CIT
Zfyve1		GO: Biological Process	GO:0007618	mating		0.001033	1	0.01355	0.1252	8	53	ABAT,PPP1R1B,VIP,APLP2,APP,TAC1,THRB,MAPK8IP2
Ypel3		GO: Biological Process	GO:0014047	glutamate secretion		0.001033	1	0.01355	0.1252	8	53	SLC1A1,SLC1A2,RAB3GAP1,SNCA,MYO6,CPLX1,SYT1,NTRK2
Selk		GO: Biological Process	GO:0044057	regulation of system process		0.001036	1	0.01355	0.1252	39	586	ABAT,PDE4B,MTPN,GRK2,AKT1,FGFR1,CX3CL1,HSP90AA1,VIP,ANK2,GLRX3,SLC1A1,YWHAE,PRKACA,ATP1A1,ATP1A2,ATP2A2,ATP2B1,ATP2B2,GAA,NOS1AP,ARHGAP42,AHCYL1,SRI,NCAM1,ITPR2,BMPR2,TAC1,CACNB1,CALM1,CALM2,CAMK2B,RTN4,RAPGEF4,ECE1,THRB,PEBP1,EMP2,EPAS1
Dhx9		GO: Biological Process	GO:0008277	regulation of G-protein coupled receptor protein signaling pathway		0.001038	1	0.01355	0.1252	14	137	GRK2,ARRB1,RGS20,SNCA,PLCB1,DNM1,NMT1,CALM1,CALM2,CAMK2B,GRK6,CAV2,ECE1,RGS4
Dpy19l1		GO: Biological Process	GO:0032414	positive regulation of ion transmembrane transporter activity		0.001051	1	0.01362	0.1259	10	79	ANK2,ANK3,NOS1AP,PLCB1,TESC,KIF5B,WNK2,CALM1,CALM2,CHP1
Chd3os		GO: Biological Process	GO:1902656	calcium ion import into cytosol		0.001052	1	0.01362	0.1259	13	122	FKBP1A,ANK2,PRKACA,ATP1A2,SNCA,MYO5A,SRI,DBI,ITPR2,CALM1,CALM2,THY1,JPH3
Zc2hc1a		GO: Biological Process	GO:0097553	calcium ion transmembrane import into cytosol		0.001052	1	0.01362	0.1259	13	122	FKBP1A,ANK2,PRKACA,ATP1A2,SNCA,MYO5A,SRI,DBI,ITPR2,CALM1,CALM2,THY1,JPH3
Dpy19l3		GO: Biological Process	GO:0060048	cardiac muscle contraction		0.001052	1	0.01362	0.1259	13	122	PDE4B,GRK2,HSP90AA1,ANK2,PRKACA,ATP1A1,ATP1A2,ATP2A2,GAA,NOS1AP,SRI,CALM1,CALM2
Slc36a4		GO: Biological Process	GO:0048002	antigen processing and presentation of peptide antigen		0.001064	1	0.01374	0.127	17	185	AP2M1,CLTC,ARF1,DYNLL2,DYNLL1,CTSL,LGMN,PSMC6,PSMD5,PSMD11,DYNC1H1,DYNC1I2,CALR,PDIA3,KIF3A,BCAP31,SAR1B
Wdfy3		GO: Biological Process	GO:0030832	regulation of actin filament length		0.001077	1	0.01388	0.1282	16	169	CFL1,PFN2,ADD1,MTPN,PREX1,EVL,ARF1,SPTAN1,SPTBN1,JMY,DLG1,GMFB,RAC1,CAPZA2,GRB2,CIT
Thrap3		GO: Biological Process	GO:0051668	localization within membrane		0.001114	1	0.01428	0.1319	14	138	GPHN,ETV5,RFTN2,LRRTM4,SAR1A,PTN,GLRB,ARHGEF9,DLG1,DLG4,RAC1,CACNA1A,NSF,SAR1B
Ubr3		GO: Biological Process	GO:0044854	plasma membrane raft assembly		0.001115	1	0.01428	0.1319	3	6	CAV2,EMP2,FLOT1
Tceal3		GO: Biological Process	GO:0044857	plasma membrane raft organization		0.001115	1	0.01428	0.1319	3	6	CAV2,EMP2,FLOT1
D1Ertd622e		GO: Biological Process	GO:0099565	chemical synaptic transmission, postsynaptic		0.001123	1	0.01431	0.1323	12	108	ABAT,MEF2C,AKT1,CX3CL1,RAB3GAP1,PRKCZ,SNCA,RIMS2,GABRB3,GABRG2,DLG4,MAPK8IP2
Cirbp		GO: Biological Process	GO:0051651	maintenance of location in cell		0.001123	1	0.01431	0.1323	12	108	AKT1,EZR,ANK3,GAA,MXI1,SRI,MPRIP,VPS13A,OS9,SYNE1,PIP5K1C,PDIA3
Penk		GO: Biological Process	GO:0032469	endoplasmic reticulum calcium ion homeostasis		0.001128	1	0.01434	0.1325	5	21	APP,ATP2A2,TMBIM6,KCTD17,BCAP31
Frrs1l		GO: Biological Process	GO:0042326	negative regulation of phosphorylation		0.00114	1	0.01447	0.1337	33	473	PPP1R1B,LRRTM4,AKT1,DNAJA1,FKBP1A,EZR,APC,CHORDC1,PPP2CA,SIRT2,ARRB1,PRKAR1A,DYNLL1,PRKCZ,SNCA,ZMYND11,HSPH1,DLG1,GMFB,TESC,PID1,WNK2,NPM1,CALM1,CALM2,RGS4,CTDSP2,GSTP1,THY1,PEBP1,PAK2,SPRED1,CHP1
Pid1		GO: Biological Process	GO:0033119	negative regulation of RNA splicing		0.001163	1	0.01472	0.136	6	31	RBM10,U2AF2,HNRNPK,SRSF7,NPM1,TMBIM6
Paip2b		GO: Biological Process	GO:0019886	antigen processing and presentation of exogenous peptide antigen via MHC class II		0.001165	1	0.01472	0.136	11	94	AP2M1,CLTC,ARF1,DYNLL2,DYNLL1,CTSL,LGMN,DYNC1H1,DYNC1I2,KIF3A,SAR1B
Ifit2		GO: Biological Process	GO:0071806	protein transmembrane transport		0.001171	1	0.01477	0.1365	8	54	TIMM23,TIMM17A,HSPA8,HSP90AA1,TOMM20,TOMM70,AFG3L2,NDUFA13
Hpcal4		GO: Biological Process	GO:0071496	cellular response to external stimulus		0.001211	1	0.01523	0.1407	23	290	PENK,GABARAP,ZFYVE1,MTPN,AES,AKT1,USF2,HSPA8,VLDLR,SLC1A2,ARHGDIA,SIRT2,CTNNB1,ATP1A1,ATP1A2,ATP2B1,MAP1LC3A,PTN,BMPR2,MAP1LC3B,RAC1,PDIA3,GSTP1
Vps13a		GO: Biological Process	GO:0043484	regulation of RNA splicing		0.001218	1	0.01529	0.1413	12	109	RBM10,U2AF2,HNRNPK,HSPA8,SRSF3,SRSF7,CELF1,THRAP3,NPM1,TMBIM6,CELF3,UHMK1
Slc25a23		GO: Biological Process	GO:0032507	maintenance of protein location in cell		0.001272	1	0.01583	0.1463	11	95	AKT1,EZR,ANK3,MXI1,SRI,MPRIP,VPS13A,OS9,SYNE1,PIP5K1C,PDIA3
Rpl27a		GO: Biological Process	GO:0031109	microtubule polymerization or depolymerization		0.001272	1	0.01583	0.1463	11	95	MAP1A,MAPT,RPS3,SKA2,MID1IP1,APC,MAPRE1,GDA,SNCA,STMN2,TPPP
Nipa1		GO: Biological Process	GO:0034763	negative regulation of transmembrane transport		0.001272	1	0.01583	0.1463	11	95	AKT1,FKBP1A,ANK3,PPP2CA,ATP1A2,SRI,KCNAB1,CALM1,CALM2,GRK6,CRBN
Cltc		GO: Biological Process	GO:0070925	organelle assembly		0.001273	1	0.01583	0.1463	42	652	MAP4,RPS3,RPS5,RPS15,ACTG1,GABARAP,RPS17,RPS19,RABGAP1,MEF2C,CIRBP,ATP6V1D,CLTC,NOCT,STX7,SDC4,SDCBP,VDAC3,EZR,NEBL,CHMP5,NEK7,RAB14,RAB3GAP1,SSX2IP,PRKAR1A,MYH10,TBC1D9B,VPS4A,MAP1LC3A,MAP1LC3B,DYNC1H1,NPM1,PUM2,KIF3A,KCTD17,RNF4,RPL3,RPL5,RPL6,RPL11,RPL12
Rpl9		GO: Biological Process	GO:0010649	regulation of cell communication by electrical coupling		0.001287	1	0.01595	0.1473	4	13	ANK3,SRI,CALM1,CALM2
Gap43		GO: Biological Process	GO:0045116	protein neddylation		0.001287	1	0.01595	0.1473	4	13	RNF7,DCUN1D4,RBX1,UBE2M
Gphn		GO: Biological Process	GO:0030048	actin filament-based movement		0.001317	1	0.01629	0.1505	13	125	PDE4B,EVL,ANK2,PARVA,ATP1A1,ATP1A2,ATP2A2,NOS1AP,MYH10,MYO5A,MYO6,SRI,EMP2
Tmem41b		GO: Biological Process	GO:0051223	regulation of protein transport		0.001324	1	0.01633	0.1509	50	815	ABAT,U2AF2,HMGB1,SELENOK,CADM1,DNAJA1,MAP4K4,CX3CL1,HSPA8,HSP90AA1,EZR,VSNL1,ANK3,NPEPPS,ARF1,PPP2CA,ARRB1,RGS20,VPS35,PRKACA,PRKCZ,VAMP4,MXI1,GAPVD1,SPTBN1,SRI,NCL,B3GAT3,ITPR2,BMPR1A,SNAP91,OS9,KIF5B,CACNA1A,GPLD1,RAP1A,CAMK4,RAPGEF4,DNM1L,TMBIM6,KIF3A,BCAP31,UBL5,OXCT1,UHMK1,LRP1,NUTF2,CDC42,ENSA,CHP1
Lix1		GO: Biological Process	GO:0044770	cell cycle phase transition		0.001338	1	0.01647	0.1522	37	555	RPS6,CDK14,AKT1,HSP90AA1,APC,SYF2,APP,YWHAE,MAPRE1,SIRT2,CSNK1E,PRKACA,ANKRD17,GIGYF2,DYNLL1,BRSK1,ARPP19,PSMC6,PSMD5,PSMD11,TUBA1A,PLCB1,PID1,DYNC1H1,DYNC1I2,NPM1,CALM1,CALM2,CAMK2A,CAMK2B,CIT,CTDSP2,CCNG1,DYNC1LI1,RPA1,ENSA,RPL17
Gigyf2		GO: Biological Process	GO:2000649	regulation of sodium ion transmembrane transporter activity		0.001341	1	0.01648	0.1523	7	43	ANK3,ATP1A2,PLCB1,TESC,KIF5B,WNK2,CHP1
Ldlrad3		GO: Biological Process	GO:0016236	macroautophagy		0.001356	1	0.01662	0.1536	30	421	MAP1A,GABARAP,U2AF2,ZFYVE1,WAC,ATP6V1D,SPTLC2,RAB3GAP1,ATP6V1H,ATP6V0E2,VPS35,DYNLL2,DYNLL1,WDFY3,LIX1,SNX5,ATP6V1C1,ATP6V1E1,ATP6V0B,ATP6V1G2,MAP1LC3A,TOMM20,NDUFB9,TOMM70,MAP1LC3B,RAB12,DNM1L,DZANK1,PAFAH1B2,ATP6V0A2
Arf1		GO: Biological Process	GO:0007411	axon guidance		0.001366	1	0.01671	0.1544	20	240	CHN1,PLXNB1,EZR,EVL,ANK3,APP,FYN,MYH10,GAP43,SPTAN1,SPTBN1,NCAM1,NRP2,BMPR2,KIF5B,KIF5C,RAC1,KRAS,GRB2,FLOT1
Asb8		GO: Biological Process	GO:1903170	negative regulation of calcium ion transmembrane transport		0.001384	1	0.01682	0.1554	6	32	FKBP1A,PPP2CA,ATP1A2,SRI,CALM1,CALM2
Mlec		GO: Biological Process	GO:0044091	membrane biogenesis		0.001384	1	0.01682	0.1554	6	32	ANK3,SPTBN1,PTPRD,CAV2,EMP2,FLOT1
Rapgef4		GO: Biological Process	GO:0006536	glutamate metabolic process		0.001384	1	0.01682	0.1554	6	32	ATCAY,APC,GAD1,ALDH5A1,GOT1,GOT2
Acap2		GO: Biological Process	GO:0006397	mRNA processing		0.001404	1	0.01699	0.157	33	479	RBM10,U2AF2,HNRNPK,ZRANB2,NOCT,QKI,HSPA8,SFPQ,SRSF3,SRSF5,SRSF7,TNRC6C,SYF2,APP,PABPC1,SF1,CELF1,LUC7L2,PRKACA,FUS,CHTOP,AHCYL1,DHX9,FAM103A1,PLCB1,THRAP3,NPM1,PAPD5,TMBIM6,UBL5,PSIP1,CELF3,UHMK1
Chchd10		GO: Biological Process	GO:0071705	nitrogen compound transport		0.001404	1	0.01699	0.157	53	879	RAB11B,ABAT,ACACA,U2AF2,RFTN2,SLC12A5,GRK2,SERINC1,QKI,MAP4K4,SLC25A23,VDAC3,VIP,VSNL1,SRSF3,SRSF5,SRSF7,SLC36A4,SLC1A1,SLC1A2,YWHAZ,RAB3GAP1,ARRB1,ATP1A2,SNCA,RIMS2,CHTOP,ILDR2,MYO5A,MYO6,SRI,CPLX1,TOMM20,ITPR2,PTPRN2,SYT1,SERINC3,KIF5B,KIF5C,CACNA1A,NPM1,GPLD1,RAP1A,NTRK2,PCLO,RTN4,RAPGEF4,SLC25A22,OXCT1,NISCH,EIF5A,FLOT1,ENSA
Rps23		GO: Biological Process	GO:0006458	'de novo' protein folding		0.001413	1	0.01703	0.1573	5	22	SELENOF,FKBP1A,HSPA8,CCT2,HSPH1
Tmsb4x		GO: Biological Process	GO:0051000	positive regulation of nitric-oxide synthase activity		0.001413	1	0.01703	0.1573	5	22	AKT1,NOS1AP,KRAS,CALM1,CALM2
Pitpnb		GO: Biological Process	GO:0097485	neuron projection guidance		0.001436	1	0.01728	0.1596	20	241	CHN1,PLXNB1,EZR,EVL,ANK3,APP,FYN,MYH10,GAP43,SPTAN1,SPTBN1,NCAM1,NRP2,BMPR2,KIF5B,KIF5C,RAC1,KRAS,GRB2,FLOT1
Lypd6		GO: Biological Process	GO:0051056	regulation of small GTPase mediated signal transduction		0.001516	1	0.0182	0.1682	23	295	CYTH2,CHN1,PREX1,ARHGAP5,ARHGDIA,ARRB1,SSX2IP,ARHGAP42,ARHGAP32,ARPP19,PSD,ARHGAP26,RAP1GAP2,GDI2,ARHGEF9,RAC1,KRAS,KALRN,PSD3,RASGEF1A,FLOT1,CDC42,SPATA13
Arhgap42		GO: Biological Process	GO:1903312	negative regulation of mRNA metabolic process		0.001542	1	0.01847	0.1707	7	44	RBM10,U2AF2,HNRNPK,SRSF7,PABPC1,NPM1,TMBIM6
Plcb1		GO: Biological Process	GO:0021543	pallium development		0.001554	1	0.01858	0.1717	16	175	HNRNPK,FGFR1,VLDLR,YWHAE,RNF7,CTNNB1,ZEB2,NRP2,GNG12,PTPRZ1,PLCB1,RAC1,NTRK2,RTN4,KIF3A,LRP1
Rnf7		GO: Biological Process	GO:0018209	peptidyl-serine modification		0.001575	1	0.01878	0.1736	22	278	PFN2,GRK2,AKT1,ARRB1,CSNK1E,PRKACA,MAST1,PRKCZ,SNCA,BRSK1,PRKX,MAST3,SPOCK2,TLK2,CAMK4,CAMK2A,CAMK2B,NTRK2,UHMK1,PAK2,CDC42,DCLK1
Dcun1d4		GO: Biological Process	GO:0008154	actin polymerization or depolymerization		0.001597	1	0.01901	0.1756	17	192	CFL1,PFN2,ADD1,MTPN,PREX1,EVL,GAS7,ARF1,SPTAN1,SPTBN1,JMY,DLG1,GMFB,RAC1,CAPZA2,GRB2,CIT
Cdc42se2		GO: Biological Process	GO:0006101	citrate metabolic process		0.001636	1	0.01943	0.1796	6	33	PDHB,ACO2,SDHA,SUCLA2,DLD,DLST
Ezr		GO: Biological Process	GO:0002027	regulation of heart rate		0.001641	1	0.01946	0.1798	11	98	ANK2,SLC1A1,YWHAE,PRKACA,ATP2A2,NOS1AP,SRI,TAC1,CALM1,CALM2,EPAS1
Lrrtm4		GO: Biological Process	GO:0016049	cell growth		0.001665	1	0.01963	0.1814	37	562	MAPT,NRN1,NDRG3,HNRNPK,MTPN,CADM1,AKT1,SEC61A1,SDCBP,PLXNB1,SORBS2,EI24,APP,CPNE5,PPP2CA,ATP6V0E2,PRKCZ,RAB21,RIMS2,NDRG4,CLSTN3,ERBIN,ZEB2,NRP2,BMPR2,SYT1,CACNA1A,NPM1,RTN4,NDUFA13,FAM107A,EIF4G2,H3F3B,CDC42,ENO1,RPL4,DCLK1
Rap1b		GO: Biological Process	GO:0010970	transport along microtubule		0.001666	1	0.01963	0.1814	12	113	MAPT,APP,SSX2IP,DYNLL1,PRKCZ,RAB21,KIF1B,KIF5B,RAB6A,LAMP1,KIF3A,CDC42
Sv2b		GO: Biological Process	GO:0034605	cellular response to heat		0.001666	1	0.01963	0.1814	12	113	HSBP1,HSPA8,HSP90AA1,CHORDC1,YWHAE,ARPP21,HSPH1,DHX9,CAMK2A,CAMK2B,DNAJB6,RPA1
Nrgn		GO: Biological Process	GO:1903305	regulation of regulated secretory pathway		0.001678	1	0.01973	0.1823	14	144	PFN2,RPH3A,ARF1,RAB3GAP1,NAPB,RIMS2,ATP2A2,PLCB1,SYN1,SYT1,CACNA1A,RAP1A,RAP1B,LAMP1
Tcf4		GO: Biological Process	GO:2001235	positive regulation of apoptotic signaling pathway		0.001688	1	0.01979	0.1828	17	193	RPS3,SPOP,SFPQ,MAGED1,EI24,YWHAE,YWHAZ,DYNLL2,DYNLL1,SERINC3,ITM2C,NMT1,CAMK2B,DNM1L,PDIA3,BCAP31,PAK2
Shisa7		GO: Biological Process	GO:0006446	regulation of translational initiation		0.001689	1	0.01979	0.1828	10	84	PAIP2,EIF5B,EIF3H,PAIP2B,NPM1,EIF4A2,UHMK1,EIF4G2,EIF5,RPL13A
Plxnb1		GO: Biological Process	GO:0035641	locomotory exploration behavior		0.001746	1	0.0203	0.1876	4	14	PENK,GAD1,DLG4,SLC4A10
Mast1		GO: Biological Process	GO:0071872	cellular response to epinephrine stimulus		0.001746	1	0.0203	0.1876	4	14	PDE4B,SIRT2,PRKACA,SNCA
Nebl		GO: Biological Process	GO:0032069	regulation of nuclease activity		0.001747	1	0.0203	0.1876	5	23	RPS3,HMGB1,AKT1,NPM1,TMBIM6
Nudcd3		GO: Biological Process	GO:0000027	ribosomal large subunit assembly		0.001747	1	0.0203	0.1876	5	23	RPL3,RPL5,RPL6,RPL11,RPL12
Mat2a		GO: Biological Process	GO:0032873	negative regulation of stress-activated MAPK cascade		0.001765	1	0.02038	0.1883	7	45	AKT1,DNAJA1,EZR,ZMYND11,HSPH1,DLG1,GSTP1
Aes		GO: Biological Process	GO:0007029	endoplasmic reticulum organization		0.001765	1	0.02038	0.1883	7	45	RTN3,SEC61A1,RAB3GAP1,CCDC47,VMP1,RTN4,CAV2
Vsnl1		GO: Biological Process	GO:0070303	negative regulation of stress-activated protein kinase signaling cascade		0.001765	1	0.02038	0.1883	7	45	AKT1,DNAJA1,EZR,ZMYND11,HSPH1,DLG1,GSTP1
Kdm2a		GO: Biological Process	GO:0002495	antigen processing and presentation of peptide antigen via MHC class II		0.001782	1	0.02054	0.1898	11	99	AP2M1,CLTC,ARF1,DYNLL2,DYNLL1,CTSL,LGMN,DYNC1H1,DYNC1I2,KIF3A,SAR1B
Ankrd17		GO: Biological Process	GO:0043271	negative regulation of ion transport		0.001792	1	0.02061	0.1904	14	145	ABAT,AKT1,FKBP1A,VIP,ANK3,PPP2CA,ATP1A2,SNCA,SRI,KCNAB1,CALM1,CALM2,GRK6,CRBN
Ntrk2		GO: Biological Process	GO:0042391	regulation of membrane potential		0.001797	1	0.02063	0.1906	28	391	ABAT,MEF2C,CX3CL1,VCP,ANK2,ANK3,YWHAE,RAB3GAP1,PRKCZ,ATP1A1,ATP1A2,SNCA,RIMS2,ATP2A2,NOS1AP,GABRB3,SRI,PTN,GLRB,DLD,DLG1,DLG4,TAC1,KIF5B,PID1,CACNA1A,RAPGEF4,MAPK8IP2
Tceb2		GO: Biological Process	GO:0018105	peptidyl-serine phosphorylation		0.001869	1	0.02141	0.1979	21	264	PFN2,GRK2,AKT1,ARRB1,CSNK1E,PRKACA,MAST1,PRKCZ,SNCA,BRSK1,PRKX,MAST3,TLK2,CAMK4,CAMK2A,CAMK2B,NTRK2,UHMK1,PAK2,CDC42,DCLK1
Emc7		GO: Biological Process	GO:0046785	microtubule polymerization		0.00188	1	0.0215	0.1986	8	58	MAPT,RPS3,APC,MAPRE1,GDA,SNCA,STMN2,TPPP
Mia3		GO: Biological Process	GO:0032415	regulation of sodium:proton antiporter activity		0.001895	1	0.02151	0.1988	3	7	PLCB1,TESC,CHP1
Cfl1		GO: Biological Process	GO:1904714	regulation of chaperone-mediated autophagy		0.001895	1	0.02151	0.1988	3	7	SNCA,EEF1A1,EEF1A2
Synpr		GO: Biological Process	GO:0006538	glutamate catabolic process		0.001895	1	0.02151	0.1988	3	7	GAD1,GOT1,GOT2
Chn1		GO: Biological Process	GO:0055114	oxidation-reduction process		0.001896	1	0.02151	0.1988	58	996	ACADL,PDHB,ACO2,HMGB1,AKR1A1,FASN,MSMO1,FADS2,AKT1,UQCRH,ALDOC,SLC25A23,SDHA,VCP,PCYOX1,GLRX3,COX6A1,COX6B1,COX7C,SORBS1,PRDX6,PPP1CC,PRKACA,KDM2A,SNCA,GAA,DBI,NDUFA8,NDUFA9,SUCLA2,GDI2,NDUFB8,NDUFB9,NDUFS4,NDUFV2,TMX1,DHCR7,KCNAB1,DLD,PYGB,DLST,SARDH,ALDH5A1,PID1,CALM1,CALM2,KIAA1191,LDHB,PDIA3,NDUFA13,CYB5B,TRAP1,SCCPDH,RDH11,CYCS,TMX4,HADHB,ENO1
Ptprn2		GO: Biological Process	GO:0001941	postsynaptic membrane organization		0.001921	1	0.02167	0.2002	6	34	GPHN,ETV5,LRRTM4,PTN,GLRB,DLG4
Tsnax		GO: Biological Process	GO:0031111	negative regulation of microtubule polymerization or depolymerization		0.001921	1	0.02167	0.2002	6	34	MAP1A,MID1IP1,APC,MAPRE1,SNCA,STMN2
Npm1		GO: Biological Process	GO:0048169	regulation of long-term neuronal synaptic plasticity		0.001921	1	0.02167	0.2002	6	34	NPTN,SNCA,DLG4,KRAS,CAMK2B,SYNGR1
Whsc1		GO: Biological Process	GO:0002504	antigen processing and presentation of peptide or polysaccharide antigen via MHC class II		0.001933	1	0.02175	0.201	11	100	AP2M1,CLTC,ARF1,DYNLL2,DYNLL1,CTSL,LGMN,DYNC1H1,DYNC1I2,KIF3A,SAR1B
Spop		GO: Biological Process	GO:1905114	cell surface receptor signaling pathway involved in cell-cell signaling		0.001936	1	0.02175	0.201	12	115	ABAT,MEF2C,AKT1,CX3CL1,RAB3GAP1,PRKCZ,SNCA,RIMS2,GABRB3,GABRG2,DLG4,MAPK8IP2
Ece1		GO: Biological Process	GO:0046879	hormone secretion		0.002042	1	0.0229	0.2116	26	357	RAB11B,ABAT,FGFR1,MAP4K4,VIP,VSNL1,SCG5,YWHAZ,ARRB1,RIMS2,ILDR2,MYO5A,SRI,CPLX1,ITPR2,NELL2,PTPRN2,TAC1,KIF5B,CACNA1A,GPLD1,RAP1A,PCLO,RAPGEF4,OXCT1,ENSA
Sptan1		GO: Biological Process	GO:0051966	regulation of synaptic transmission, glutamatergic		0.002101	1	0.02343	0.2165	8	59	MEF2C,RAB3GAP1,PRKACA,ATP1A2,SYT1,KALRN,NTRK2,MAPK8IP2
Abat		GO: Biological Process	GO:0009206	purine ribonucleoside triphosphate biosynthetic process		0.002101	1	0.02343	0.2165	8	59	ATP5PD,VCP,ATP5F1A,ATP5F1B,ATP5PF,CHCHD10,PID1,ATP6V0A2
Camk2b		GO: Biological Process	GO:0035637	multicellular organismal signaling		0.002101	1	0.02343	0.2165	17	197	ANK2,ANK3,YWHAE,PRKACA,ATP1A1,ATP1A2,ATP2A2,ATP2B1,ATP2B2,AHCYL1,SRI,ITPR2,CACNA1A,CACNB1,CALM1,CALM2,RAPGEF4
Usf2		GO: Biological Process	GO:0022401	negative adaptation of signaling pathway		0.002136	1	0.02364	0.2185	5	24	GRK2,ARRB1,DNM1,CAMK2B,GRK6
Tspan7		GO: Biological Process	GO:0031112	positive regulation of microtubule polymerization or depolymerization		0.002136	1	0.02364	0.2185	5	24	MAPT,RPS3,APC,GDA,STMN2
Spock2		GO: Biological Process	GO:0002029	desensitization of G-protein coupled receptor protein signaling pathway		0.002136	1	0.02364	0.2185	5	24	GRK2,ARRB1,DNM1,CAMK2B,GRK6
Phf21a		GO: Biological Process	GO:0030041	actin filament polymerization		0.002141	1	0.02364	0.2185	15	164	PFN2,ADD1,MTPN,PREX1,EVL,GAS7,ARF1,SPTAN1,SPTBN1,JMY,DLG1,GMFB,RAC1,CAPZA2,GRB2
Dhcr7		GO: Biological Process	GO:0044089	positive regulation of cellular component biogenesis		0.002141	1	0.02364	0.2185	31	453	MAPT,RPS3,PFN2,LRRTM4,SDC4,SDCBP,VCP,HSP90AA1,EVL,APC,ARF1,GDA,RAB3GAP1,CTNNB1,CLSTN3,VPS4A,ADGRB2,PSMC6,JMY,DLG1,GMFB,TAC1,RAC1,RBX1,NTRK2,TPPP,GRB2,KCTD17,FLOT1,RPA1,CDC42
Rpl5		GO: Biological Process	GO:0030833	regulation of actin filament polymerization		0.002172	1	0.02394	0.2212	14	148	PFN2,ADD1,MTPN,PREX1,EVL,ARF1,SPTAN1,SPTBN1,JMY,DLG1,GMFB,RAC1,CAPZA2,GRB2
Tmed9		GO: Biological Process	GO:0007163	establishment or maintenance of cell polarity		0.002198	1	0.02414	0.2231	16	181	MAP2,MAP4,CFL1,CAP2,EZR,APC,PARVA,PRKCZ,BRSK1,ERBIN,SNAP91,DLG1,DLG4,RAP1B,KIF3A,CDC42
Rpl30		GO: Biological Process	GO:0051983	regulation of chromosome segregation		0.002203	1	0.02414	0.2231	10	87	SFPQ,APC,SIRT2,CTNNB1,ATRX,PUM2,CIT,RNF4,DYNC1LI1,CDC42
Gda		GO: Biological Process	GO:0060996	dendritic spine development		0.002203	1	0.02414	0.2231	10	87	CFL1,MEF2C,HNRNPK,SLC12A5,ARF1,DLG4,KALRN,CAMK2B,EIF4G2,PAK2
Rpl18		GO: Biological Process	GO:0035773	insulin secretion involved in cellular response to glucose stimulus		0.002224	1	0.02433	0.2248	9	73	RAB11B,MAP4K4,VSNL1,ARRB1,SRI,PTPRN2,KIF5B,GPLD1,OXCT1
Mfsd4a		GO: Biological Process	GO:0071869	response to catecholamine		0.002242	1	0.02448	0.2262	6	35	PDE4B,PENK,APP,SIRT2,PRKACA,SNCA
Ddn		GO: Biological Process	GO:0031667	response to nutrient levels		0.00226	1	0.02455	0.2268	38	592	MAPT,PENK,GABARAP,U2AF2,ZFYVE1,WAC,ATP6V1D,AKT1,USF2,HSPA8,VLDLR,SPTLC2,RAB3GAP1,SIRT2,ATP6V1H,ATP6V0E2,VPS35,WDFY3,ATP2B1,SNX5,ATP6V1C1,ATP6V1E1,ATP6V0B,ATP6V1G2,MAP1LC3A,PTN,BMPR2,PCSK1N,MAP1LC3B,RAB12,DNM1L,PDIA3,GSTP1,OXCT1,FSTL1,PAFAH1B2,ENSA,ATP6V0A2
Zc3h4		GO: Biological Process	GO:0046129	purine ribonucleoside biosynthetic process		0.002265	1	0.02455	0.2268	11	102	ACACA,MAT2A,AK4,ATP5PD,VCP,ATP5F1A,ATP5F1B,ATP5PF,CHCHD10,PID1,ATP6V0A2
Rpl11		GO: Biological Process	GO:0042451	purine nucleoside biosynthetic process		0.002265	1	0.02455	0.2268	11	102	ACACA,MAT2A,AK4,ATP5PD,VCP,ATP5F1A,ATP5F1B,ATP5PF,CHCHD10,PID1,ATP6V0A2
Hadhb		GO: Biological Process	GO:0006835	dicarboxylic acid transport		0.002265	1	0.02455	0.2268	11	102	ABAT,SLC1A1,SLC1A2,RAB3GAP1,ATP1A2,SNCA,MYO6,CPLX1,SYT1,NTRK2,SLC25A22
Flot1		GO: Biological Process	GO:0045744	negative regulation of G-protein coupled receptor protein signaling pathway		0.002285	1	0.02462	0.2275	7	47	GRK2,ARRB1,SNCA,DNM1,CAMK2B,GRK6,RGS4
Grb2		GO: Biological Process	GO:0086065	cell communication involved in cardiac conduction		0.002285	1	0.02462	0.2275	7	47	ANK2,PRKACA,ATP1A1,ATP1A2,SRI,CALM1,CALM2
Atxn7l3		GO: Biological Process	GO:0008333	endosome to lysosome transport		0.002285	1	0.02462	0.2275	7	47	SORT1,CHMP5,ARF1,TRAK1,VPS35,RAB12,AKTIP
Rpl3		GO: Biological Process	GO:0045760	positive regulation of action potential		0.002307	1	0.02472	0.2284	4	15	ANK3,NOS1AP,TAC1,RAPGEF4
Tpt1		GO: Biological Process	GO:0048268	clathrin coat assembly		0.002307	1	0.02472	0.2284	4	15	NSG2,NSG1,CLINT1,SNAP91
Casc4		GO: Biological Process	GO:0001921	positive regulation of receptor recycling		0.002307	1	0.02472	0.2284	4	15	NSG1,SNCA,NSF,ECE1
Rpl35a		GO: Biological Process	GO:0048639	positive regulation of developmental growth		0.002324	1	0.02486	0.2297	16	182	MAPT,MEF2C,HNRNPK,FGFR1,EZR,CPNE5,CELF1,RIMS2,NACA,NCAM1,BMPR2,PLCB1,SYT1,DLG1,EIF4G2,RPL4
Gstp1		GO: Biological Process	GO:0048278	vesicle docking		0.002343	1	0.02496	0.2307	8	60	STX7,NDRG4,SNPH,NCAM1,SYT1,NSF,CAV2,STX6
Arl1		GO: Biological Process	GO:0009145	purine nucleoside triphosphate biosynthetic process		0.002343	1	0.02496	0.2307	8	60	ATP5PD,VCP,ATP5F1A,ATP5F1B,ATP5PF,CHCHD10,PID1,ATP6V0A2
Slc4a4		GO: Biological Process	GO:0009127	purine nucleoside monophosphate biosynthetic process		0.002446	1	0.02597	0.2399	9	74	AK4,ATP5PD,VCP,ATP5F1A,ATP5F1B,ATP5PF,CHCHD10,PID1,ATP6V0A2
Naca		GO: Biological Process	GO:0009168	purine ribonucleoside monophosphate biosynthetic process		0.002446	1	0.02597	0.2399	9	74	AK4,ATP5PD,VCP,ATP5F1A,ATP5F1B,ATP5PF,CHCHD10,PID1,ATP6V0A2
Pclo		GO: Biological Process	GO:0006865	amino acid transport		0.002553	1	0.02701	0.2496	15	167	ABAT,SERINC1,SLC36A4,SLC1A1,SLC1A2,RAB3GAP1,ATP1A2,SNCA,MYO6,CPLX1,SYT1,SERINC3,CACNA1A,NTRK2,SLC25A22
Gdpd1		GO: Biological Process	GO:1990138	neuron projection extension		0.002553	1	0.02701	0.2496	15	167	MAPT,NRN1,HNRNPK,PLXNB1,CPNE5,PRKCZ,RAB21,RIMS2,NRP2,BMPR2,SYT1,RTN4,EIF4G2,RPL4,DCLK1
Ppp1r1b		GO: Biological Process	GO:0043457	regulation of cellular respiration		0.002585	1	0.02715	0.2509	5	25	SLC25A23,VCP,PRKACA,SNCA,TRAP1
Kalrn		GO: Biological Process	GO:0015986	ATP synthesis coupled proton transport		0.002585	1	0.02715	0.2509	5	25	ATP5PD,ATP5F1A,ATP5F1B,ATP5PF,ATP6V0A2
Tac1		GO: Biological Process	GO:0015985	energy coupled proton transport, down electrochemical gradient		0.002585	1	0.02715	0.2509	5	25	ATP5PD,ATP5F1A,ATP5F1B,ATP5PF,ATP6V0A2
Rps17		GO: Biological Process	GO:0065002	intracellular protein transmembrane transport		0.002586	1	0.02715	0.2509	7	48	TIMM23,TIMM17A,HSPA8,HSP90AA1,TOMM20,AFG3L2,NDUFA13
Gmfb		GO: Biological Process	GO:0048873	homeostasis of number of cells within a tissue		0.002603	1	0.02723	0.2516	6	36	ADD1,GIGYF2,ILDR2,RAC1,KRAS,RPA1
Qk		GO: Biological Process	GO:2001258	negative regulation of cation channel activity		0.002603	1	0.02723	0.2516	6	36	FKBP1A,ANK3,SRI,KCNAB1,CALM1,CALM2
Unc13c		GO: Biological Process	GO:0032411	positive regulation of transporter activity		0.002611	1	0.02727	0.252	10	89	ANK2,ANK3,NOS1AP,PLCB1,TESC,KIF5B,WNK2,CALM1,CALM2,CHP1
Cnih4		GO: Biological Process	GO:0060401	cytosolic calcium ion transport		0.002617	1	0.02728	0.2521	14	151	FKBP1A,ANK2,PRKACA,ATP1A2,SNCA,ATP2A2,MYO5A,SRI,DBI,ITPR2,CALM1,CALM2,THY1,JPH3
Morf4l1		GO: Biological Process	GO:0009266	response to temperature stimulus		0.00263	1	0.02737	0.2529	19	236	SLC12A5,CIRBP,AKT1,HSBP1,DNAJA1,HSPA8,HSP90AA1,CHORDC1,YWHAE,ATP2B1,ARPP21,HSPH1,DHX9,PCSK1N,CAMK2A,CAMK2B,DNAJB6,PSIP1,RPA1
Rpl17		GO: Biological Process	GO:0090257	regulation of muscle system process		0.002694	1	0.02799	0.2586	18	219	ABAT,PDE4B,MTPN,GRK2,HSP90AA1,ANK2,GLRX3,PRKACA,ATP1A1,ATP1A2,ATP2A2,NOS1AP,ARHGAP42,SRI,CALM1,CALM2,CAMK2B,ECE1
Zfp706		GO: Biological Process	GO:0030163	protein catabolic process		0.002716	1	0.02816	0.2602	50	844	HSP90B1,MARCH6,BACE1,WAC,UBE2A,UBE2I,AKT1,SPOP,SDCBP,VCP,PCYOX1,SEL1L,EZR,VIP,RNF44,APC,PPP2CA,RNF7,SIRT2,ARRB1,CSNK1E,PRKACA,UBR3,SUMO2,CTNNB1,FYN,CTSL,YME1L1,LGMN,VPS4A,PSMC6,PSMD5,PSMD11,OTUD7B,CCDC47,OS9,RBX1,RAB12,TLK2,PCNP,GPLD1,NSF,COP1,KCTD17,NDUFA13,BCAP31,RNF4,DYNC1LI1,CDC42,CRBN
Timm17a		GO: Biological Process	GO:0051099	positive regulation of binding		0.002781	1	0.02878	0.266	14	152	HMGB1,MEF2C,ADD1,FKBP1A,MAPRE1,SIRT2,ARRB1,MAP1LC3B,CALM1,CALM2,AKTIP,FLOT1,ENO1,CRBN
Rpl7a		GO: Biological Process	GO:0071333	cellular response to glucose stimulus		0.002809	1	0.02903	0.2682	13	136	RAB11B,HNRNPK,MAP4K4,VSNL1,PPP2CA,ARRB1,PRKACA,SRI,PTPRN2,KIF5B,GPLD1,RAP1A,OXCT1
Ncs1		GO: Biological Process	GO:0006790	sulfur compound metabolic process		0.00287	1	0.0296	0.2735	28	404	ACACA,PDHB,MAT2A,ELOVL5,AKR1A1,FASN,SULT4A1,PCYOX1,ST3GAL2,IDS,SMS,CTNNB1,SNCA,AHCYL1,SPOCK2,SUCLA2,B3GAT3,ACSBG1,GLO1,DLD,DLST,ALDH5A1,CACNA1A,ACSL6,GSTM5,GSTP1,EEF1G,PCCB
Ei24		GO: Biological Process	GO:0071616	acyl-CoA biosynthetic process		0.00289	1	0.0297	0.2744	8	62	ACACA,PDHB,ELOVL5,FASN,SNCA,ACSBG1,DLD,ACSL6
Actg1		GO: Biological Process	GO:0035384	thioester biosynthetic process		0.00289	1	0.0297	0.2744	8	62	ACACA,PDHB,ELOVL5,FASN,SNCA,ACSBG1,DLD,ACSL6
Kif1b		GO: Biological Process	GO:0045927	positive regulation of growth		0.002918	1	0.02994	0.2767	21	274	MAPT,MEF2C,HNRNPK,MTPN,AKT1,FGFR1,SDCBP,EZR,CPNE5,CELF1,RIMS2,NACA,NCAM1,BMPR2,PLCB1,SYT1,DLG1,EIF4G2,H3F3B,CDC42,RPL4
Rps15		GO: Biological Process	GO:0071420	cellular response to histamine		0.002943	1	0.03014	0.2785	3	8	GABRA1,GABRB3,GABRG2
Eno1		GO: Biological Process	GO:0002764	immune response-regulating signaling pathway		0.002964	1	0.03026	0.2796	33	502	HSP90B1,PDE4B,ACTG1,HMGB1,RFTN2,MEF2C,HSP90AA1,EZR,CYFIP2,ELMO2,PRKACA,ANKRD17,FYN,CTSL,LGMN,MYO10,PSMC6,PSMD5,PSMD11,ERBIN,RAC1,KRAS,GPLD1,CALM1,CALM2,GRB2,PUM2,SLC39A10,THY1,PAK2,PLEKHA1,FLOT1,CDC42
Cycs		GO: Biological Process	GO:0006900	vesicle budding from membrane		0.002969	1	0.03026	0.2796	12	121	ATP8A1,CHMP5,SAR1A,ARF1,NSG2,NSG1,TMED9,CLINT1,VPS4A,SNAP91,NSF,SAR1B
Uqcrh		GO: Biological Process	GO:0010801	negative regulation of peptidyl-threonine phosphorylation		0.002981	1	0.03026	0.2796	4	16	SIRT2,CALM1,CALM2,SPRED1
Rpl7l1		GO: Biological Process	GO:0007035	vacuolar acidification		0.002981	1	0.03026	0.2796	4	16	ATP6V1H,ATP6V0E2,ATP6V0B,ATP6V0A2
Rdh11		GO: Biological Process	GO:0006123	mitochondrial electron transport, cytochrome c to oxygen		0.002981	1	0.03026	0.2796	4	16	COX6A1,COX6B1,COX7C,CYCS
Hmgb1		GO: Biological Process	GO:0035774	positive regulation of insulin secretion involved in cellular response to glucose stimulus		0.003005	1	0.03034	0.2804	6	37	VSNL1,ARRB1,SRI,KIF5B,GPLD1,OXCT1
Suds3		GO: Biological Process	GO:0050686	negative regulation of mRNA processing		0.003005	1	0.03034	0.2804	6	37	RBM10,U2AF2,HNRNPK,SRSF7,NPM1,TMBIM6
Eif1ax		GO: Biological Process	GO:0071867	response to monoamine		0.003005	1	0.03034	0.2804	6	37	PDE4B,PENK,APP,SIRT2,PRKACA,SNCA
Bmpr2		GO: Biological Process	GO:0045185	maintenance of protein location		0.00307	1	0.03094	0.2859	11	106	AKT1,EZR,ANK3,MXI1,SRI,MPRIP,VPS13A,OS9,SYNE1,PIP5K1C,PDIA3
3110035E14Rik		GO: Biological Process	GO:0043266	regulation of potassium ion transport		0.003076	1	0.03096	0.286	10	91	VIP,DPP10,ANK2,ANK3,HBP1,YWHAE,NOS1AP,KCNAB1,DLG1,KIF5B
Sort1		GO: Biological Process	GO:0048025	negative regulation of mRNA splicing, via spliceosome		0.003098	1	0.03112	0.2875	5	26	RBM10,U2AF2,HNRNPK,SRSF7,NPM1
Ptprz1		GO: Biological Process	GO:0048588	developmental cell growth		0.003118	1	0.03127	0.2889	18	222	MAPT,NRN1,HNRNPK,PLXNB1,SORBS2,APP,CPNE5,PRKCZ,RAB21,RIMS2,ZEB2,NRP2,BMPR2,SYT1,RTN4,EIF4G2,RPL4,DCLK1
Rap1a		GO: Biological Process	GO:0007005	mitochondrion organization		0.003142	1	0.03145	0.2906	46	767	MAP1A,MRPL30,TIMM23,GABARAP,U2AF2,FUNDC1,TIMM17A,AKT1,HSP90AA1,NPEPPS,ATCAY,IFIT2,ATF2,YWHAE,YWHAZ,RNF7,PPP2R2B,MRPL48,DYNLL2,DYNLL1,SNCA,YME1L1,ATP5F1B,CHCHD10,MAP1LC3A,TOMM20,NDUFA8,NDUFA9,NDUFB8,NDUFB9,NDUFS4,NDUFV2,TOMM70,AFG3L2,MAP1LC3B,NMT1,PID1,AGTPBP1,CAMK2A,DNM1L,CAV2,NDUFA13,DZANK1,UBL5,CYCS,EPAS1
Ank3		GO: Biological Process	GO:0001935	endothelial cell proliferation		0.003178	1	0.03175	0.2934	12	122	HMGB1,AKT1,VIP,PPP1R16B,PRKX,ATP5F1A,NRP2,BMPR1A,BMPR2,DLG1,AGGF1,CAV2
Msi2		GO: Biological Process	GO:0090066	regulation of anatomical structure size		0.003187	1	0.03177	0.2936	35	544	MAPT,CFL1,PFN2,ADD1,MTPN,AKT1,CX3CL1,PREX1,HSP90AA1,EZR,VIP,EVL,ARF1,ARHGAP5,ATP1A2,RAB21,ATP2B2,ARHGAP42,SPTAN1,SPTBN1,RAP1GAP2,JMY,BMPR2,MANF,DLG1,GMFB,RAC1,NPM1,RTN4,CAPZA2,GRB2,ECE1,CIT,EIF4G2,RPL4
Rmdn3		GO: Biological Process	GO:0071331	cellular response to hexose stimulus		0.003191	1	0.03177	0.2936	13	138	RAB11B,HNRNPK,MAP4K4,VSNL1,PPP2CA,ARRB1,PRKACA,SRI,PTPRN2,KIF5B,GPLD1,RAP1A,OXCT1
Gad1		GO: Biological Process	GO:0009060	aerobic respiration		0.003198	1	0.03179	0.2937	8	63	PDHB,ACO2,UQCRH,SDHA,VCP,SUCLA2,DLD,DLST
Srsf3		GO: Biological Process	GO:0009408	response to heat		0.003203	1	0.03179	0.2937	15	171	AKT1,HSBP1,DNAJA1,HSPA8,HSP90AA1,CHORDC1,YWHAE,ARPP21,HSPH1,DHX9,CAMK2A,CAMK2B,DNAJB6,PSIP1,RPA1
Rpl23		GO: Biological Process	GO:0009142	nucleoside triphosphate biosynthetic process		0.003217	1	0.03187	0.2945	9	77	AK4,ATP5PD,VCP,ATP5F1A,ATP5F1B,ATP5PF,CHCHD10,PID1,ATP6V0A2
Pcnp		GO: Biological Process	GO:0009914	hormone transport		0.003316	1	0.0328	0.303	26	370	RAB11B,ABAT,FGFR1,MAP4K4,VIP,VSNL1,SCG5,YWHAZ,ARRB1,RIMS2,ILDR2,MYO5A,SRI,CPLX1,ITPR2,NELL2,PTPRN2,TAC1,KIF5B,CACNA1A,GPLD1,RAP1A,PCLO,RAPGEF4,OXCT1,ENSA
Eef1g		GO: Biological Process	GO:0097190	apoptotic signaling pathway		0.003339	1	0.03297	0.3046	39	626	TPT1,MAPT,RPS3,GABARAP,HNRNPK,SORT1,SELENOK,AKT1,FGFR1,SPOP,CX3CL1,CDIP1,SFPQ,MAGED1,EI24,YWHAE,YWHAZ,RNF7,DYNLL2,DYNLL1,CTNNB1,FYN,ZMYND11,HSPH1,JMY,SERINC3,ITM2C,NMT1,CAMK2B,DNM1L,LAMP1,TMBIM6,PDIA3,GSTP1,NDUFA13,TRAP1,BCAP31,CYCS,PAK2
B3gat3		GO: Biological Process	GO:0002757	immune response-activating signal transduction		0.003383	1	0.03335	0.3082	31	467	HSP90B1,PDE4B,ACTG1,HMGB1,RFTN2,MEF2C,HSP90AA1,EZR,CYFIP2,ELMO2,PRKACA,ANKRD17,FYN,CTSL,LGMN,MYO10,PSMC6,PSMD5,PSMD11,ERBIN,RAC1,KRAS,GPLD1,GRB2,PUM2,SLC39A10,THY1,PAK2,PLEKHA1,FLOT1,CDC42
Ganab		GO: Biological Process	GO:0071326	cellular response to monosaccharide stimulus		0.003397	1	0.03342	0.3088	13	139	RAB11B,HNRNPK,MAP4K4,VSNL1,PPP2CA,ARRB1,PRKACA,SRI,PTPRN2,KIF5B,GPLD1,RAP1A,OXCT1
Sms		GO: Biological Process	GO:0072350	tricarboxylic acid metabolic process		0.003451	1	0.0338	0.3123	6	38	PDHB,ACO2,SDHA,SUCLA2,DLD,DLST
Tuba1a		GO: Biological Process	GO:0048791	calcium ion-regulated exocytosis of neurotransmitter		0.003451	1	0.0338	0.3123	6	38	RPH3A,RAB3GAP1,RIMS2,ATP2A2,SYT1,CACNA1A
1500011B03Rik		GO: Biological Process	GO:0051222	positive regulation of protein transport		0.003452	1	0.0338	0.3123	33	507	ABAT,U2AF2,HMGB1,SELENOK,CADM1,HSP90AA1,EZR,VSNL1,ANK3,NPEPPS,ARF1,ARRB1,VPS35,PRKACA,PRKCZ,SPTBN1,SRI,NCL,B3GAT3,BMPR1A,KIF5B,GPLD1,CAMK4,RAPGEF4,DNM1L,KIF3A,BCAP31,UBL5,OXCT1,LRP1,NUTF2,CDC42,CHP1
Rpl13a		GO: Biological Process	GO:0032984	protein-containing complex disassembly		0.003459	1	0.0338	0.3124	21	278	MAP1A,CFL1,MRPL30,ADD1,MTPN,MID1IP1,HSPA8,EVL,CHMP5,APC,DENR,NAPB,MRPL48,CTNNB1,VPS4A,SPTAN1,SPTBN1,KIF5B,CAPZA2,STMN2,EIF5A
Grk6		GO: Biological Process	GO:0007041	lysosomal transport		0.003512	1	0.03427	0.3167	9	78	SORT1,HSPA8,CHMP5,ARF1,TRAK1,VPS35,RAB12,LAMP1,AKTIP
Rab11b		GO: Biological Process	GO:0006611	protein export from nucleus		0.003532	1	0.0344	0.3179	8	64	PRKACA,AHCYL1,CALR,CAMK4,UHMK1,EIF5A,NUTF2,CHP1
Ctdsp2		GO: Biological Process	GO:0045921	positive regulation of exocytosis		0.003606	1	0.03506	0.324	10	93	SDC4,SDCBP,VSNL1,ARF1,ATP6AP1,VPS4A,PLCB1,SYT1,LAMP1,NCS1
Ccdc47		GO: Biological Process	GO:0030100	regulation of endocytosis		0.003767	1	0.03644	0.3367	18	226	HMGB1,HNRNPK,ADD1,HSPA8,SDCBP,ARF1,ARRB1,SNCA,RAB21,SNPH,SNAP91,DLG4,RAC1,RAP1A,CALR,SYNE1,KIF3A,FLOT1
Eif5a		GO: Biological Process	GO:0051280	negative regulation of release of sequestered calcium ion into cytosol		0.003778	1	0.03644	0.3367	4	17	FKBP1A,SRI,CALM1,CALM2
Zfp664		GO: Biological Process	GO:0001967	suckling behavior		0.003778	1	0.03644	0.3367	4	17	PHF21A,APLP2,APP,UBR3
Rpl36a		GO: Biological Process	GO:0042776	mitochondrial ATP synthesis coupled proton transport		0.003778	1	0.03644	0.3367	4	17	ATP5PD,ATP5F1A,ATP5F1B,ATP5PF
Ubl5		GO: Biological Process	GO:0032516	positive regulation of phosphoprotein phosphatase activity		0.003778	1	0.03644	0.3367	4	17	PPP2CA,CALM1,CALM2,SLC39A10
Lin52		GO: Biological Process	GO:0042274	ribosomal small subunit biogenesis		0.003892	1	0.03726	0.3443	8	65	RPS5,RPS6,RPS15,RPS17,RPS19,RPS21,RPS24,NPM1
Umad1		GO: Biological Process	GO:0072384	organelle transport along microtubule		0.003892	1	0.03726	0.3443	8	65	MAPT,PRKCZ,KIF1B,KIF5B,RAB6A,LAMP1,KIF3A,CDC42
Tomm20		GO: Biological Process	GO:0009201	ribonucleoside triphosphate biosynthetic process		0.003892	1	0.03726	0.3443	8	65	ATP5PD,VCP,ATP5F1A,ATP5F1B,ATP5PF,CHCHD10,PID1,ATP6V0A2
Syne1		GO: Biological Process	GO:0033238	regulation of cellular amine metabolic process		0.003896	1	0.03726	0.3443	10	94	ABAT,PDE1B,ATCAY,APC,SNCA,PSMC6,PSMD5,PSMD11,PEBP1,EPAS1
Cav2		GO: Biological Process	GO:0045740	positive regulation of DNA replication		0.003896	1	0.03726	0.3443	10	94	FGFR1,NEK7,CCT2,CCT5,CTNNB1,ATRX,RAC1,NPM1,CALR,CDC42
		GO: Biological Process	GO:0051270	regulation of cellular component movement		0.00393	1	0.03741	0.3457	50	860	PDE4B,MAPT,HMGB1,RPS19,PFN2,SELENOK,ATP8A1,AKT1,FGFR1,CX3CL1,SDC4,SDCBP,C5orf30,PLXNB1,EVL,MIA3,ANK2,APC,MAPRE1,ARHGAP5,ARHGDIA,NSMF,SSX2IP,ATP1A1,ATP1A2,ATP2A2,PRKX,NDRG4,NOS1AP,SRI,NRP2,PTN,BMPR2,PTPRZ1,PLCB1,TAC1,RAC1,GPLD1,CALR,RTN4,RAPGEF4,LAMP1,SPAG9,KIF3A,THY1,NISCH,LRP1,TMSB4X,EMP2,SPATA13
		GO: Biological Process	GO:0007223	Wnt signaling pathway, calcium modulating pathway		0.003945	1	0.03741	0.3457	6	39	TNRC6C,CTNNB1,PLCB1,CALM1,CALM2,CAMK2A
		GO: Biological Process	GO:0032527	protein exit from endoplasmic reticulum		0.003945	1	0.03741	0.3457	6	39	HSP90B1,VCP,SEL1L,TMED9,OS9,BCAP31
		GO: Biological Process	GO:0051693	actin filament capping		0.003945	1	0.03741	0.3457	6	39	ADD1,MTPN,EVL,SPTAN1,SPTBN1,CAPZA2
		GO: Biological Process	GO:0009416	response to light stimulus		0.003951	1	0.03741	0.3457	24	337	PDE1B,MEIS2,CIRBP,UBE2A,PPP1R1B,AKT1,EI24,APP,SLC1A2,PPP1CC,NPTN,ARRB1,ATP1A2,BRSK1,NDRG4,PTN,PTPRZ1,NMT1,KRAS,CALM1,CALM2,NTRK2,RDH11,SLC4A10
		GO: Biological Process	GO:0010639	negative regulation of organelle organization		0.003951	1	0.03741	0.3457	24	337	MAP1A,MAP4,PFN2,ADD1,MTPN,MID1IP1,AKT1,EVL,OTUB1,APC,SAR1A,MAPRE1,PRKAR1A,SNCA,ATRX,SPTAN1,SPTBN1,GMFB,PID1,NPM1,CAPZA2,STMN2,DYNC1LI1,H3F3B
		GO: Biological Process	GO:0044257	cellular protein catabolic process		0.003981	1	0.03763	0.3478	42	694	HSP90B1,MARCH6,WAC,UBE2A,UBE2I,AKT1,SPOP,SDCBP,VCP,PCYOX1,SEL1L,EZR,RNF44,APC,RNF7,SIRT2,ARRB1,CSNK1E,PRKACA,UBR3,SUMO2,CTNNB1,CTSL,YME1L1,LGMN,VPS4A,PSMC6,PSMD5,PSMD11,OTUD7B,CCDC47,OS9,RBX1,RAB12,TLK2,PCNP,COP1,KCTD17,BCAP31,RNF4,DYNC1LI1,CRBN
		GO: Biological Process	GO:0050821	protein stabilization		0.00408	1	0.03835	0.3544	13	142	PFN2,HSP90AA1,SEL1L,ANK2,CCT2,RAB3GAP1,IPO9,CCT5,TESC,NPM1,CALR,LAMP1,CHP1
		GO: Biological Process	GO:0030072	peptide hormone secretion		0.00408	1	0.03835	0.3544	21	282	RAB11B,ABAT,MAP4K4,VIP,VSNL1,ARRB1,RIMS2,ILDR2,MYO5A,SRI,CPLX1,ITPR2,PTPRN2,KIF5B,CACNA1A,GPLD1,RAP1A,PCLO,RAPGEF4,OXCT1,ENSA
		GO: Biological Process	GO:0007507	heart development		0.004093	1	0.03835	0.3544	37	593	SPEG,MEF2C,MEF2D,MKL2,GRK2,FGFR1,FKBP1A,VLDLR,SORBS2,ANK2,NEBL,NSD2,ATF2,NCOR2,PARVA,TCF25,PRKAR1A,KDM2A,CTNNB1,NDRG4,GAA,MYH10,NACA,SRI,NCAM1,NDUFV2,NRP2,PTN,BMPR1A,KCNAB1,CALR,RTN4,ECE1,KIF3A,OXCT1,LRP1,CDC42
		GO: Biological Process	GO:0072583	clathrin-dependent endocytosis		0.004103	1	0.03835	0.3544	7	52	AP2M1,SNCA,SNAP91,SYT1,DNM1,HIP1R,PIP5K1C
		GO: Biological Process	GO:0086001	cardiac muscle cell action potential		0.004103	1	0.03835	0.3544	7	52	ANK2,ANK3,YWHAE,ATP1A1,ATP1A2,ATP2A2,NOS1AP
		GO: Biological Process	GO:0030837	negative regulation of actin filament polymerization		0.004103	1	0.03835	0.3544	7	52	PFN2,ADD1,MTPN,EVL,SPTAN1,SPTBN1,CAPZA2
		GO: Biological Process	GO:0086003	cardiac muscle cell contraction		0.004103	1	0.03835	0.3544	7	52	PDE4B,ANK2,ATP1A1,ATP1A2,ATP2A2,NOS1AP,SRI
		GO: Biological Process	GO:1901615	organic hydroxy compound metabolic process		0.004115	1	0.03841	0.3549	36	573	ABAT,PDE1B,ACADL,MTPN,MSMO1,FGFR1,VLDLR,PSAT1,SPTLC2,APLP2,NPC2,APP,CNBP,SNCA,ATP2B2,LGMN,MYO5A,ABHD3,DBI,ZEB2,GLO1,DHCR7,PLCB1,SARDH,GOT1,CACNA1A,GPLD1,CALM1,CALM2,LDHB,THRB,NUDT3,RDH11,LRP1,INSIG2,EPAS1
		GO: Biological Process	GO:0031334	positive regulation of protein complex assembly		0.004132	1	0.0385	0.3557	18	228	MAPT,RPS3,PFN2,VCP,EVL,APC,ARF1,GDA,CTNNB1,PSMC6,JMY,DLG1,GMFB,RAC1,RBX1,TPPP,GRB2,RPA1
		GO: Biological Process	GO:0035567	non-canonical Wnt signaling pathway		0.00418	1	0.03889	0.3593	14	159	AP2M1,CLTC,TNRC6C,CSNK1E,CTNNB1,PSMC6,PSMD5,PSMD11,PLCB1,RAC1,CALM1,CALM2,CAMK2A,CDC42
		GO: Biological Process	GO:0038180	nerve growth factor signaling pathway		0.004286	1	0.03974	0.3672	3	9	SORT1,KIDINS220,RAP1A
		GO: Biological Process	GO:1901844	regulation of cell communication by electrical coupling involved in cardiac conduction		0.004286	1	0.03974	0.3672	3	9	SRI,CALM1,CALM2
		GO: Biological Process	GO:0032956	regulation of actin cytoskeleton organization		0.004333	1	0.04009	0.3704	22	302	CFL1,PFN2,MEF2C,ADD1,MTPN,PREX1,SDC4,EZR,EVL,ARF1,ARHGDIA,SPTAN1,SPTBN1,JMY,DLG1,GMFB,TAC1,RAC1,CAPZA2,GRB2,CIT,LRP1
		GO: Biological Process	GO:0030970	retrograde protein transport, ER to cytosol		0.004337	1	0.04009	0.3704	5	28	HSP90B1,VCP,SEL1L,OS9,BCAP31
		GO: Biological Process	GO:0061061	muscle structure development		0.004415	1	0.04066	0.3757	40	657	SPEG,ACTG1,COPS2,MEF2C,MEF2D,MTPN,SORT1,MKL2,AKT1,FGFR1,QKI,FKBP1A,SORBS2,ANK2,NEBL,SIRT2,MORF4L2,PRKAR1A,ANKRD17,CTNNB1,ATP2A2,MYH10,NACA,SRI,NCAM1,MYEF2,AFG3L2,PLCB1,KCNAB1,SGCE,KRAS,CALR,SYNE1,SPAG9,CAV2,EIF5A,H3F3B,FLOT1,CDC42,EPAS1
		GO: Biological Process	GO:2001242	regulation of intrinsic apoptotic signaling pathway		0.00442	1	0.04066	0.3757	14	160	TPT1,RPS3,HNRNPK,AKT1,SPOP,SFPQ,EI24,HSPH1,SERINC3,DNM1L,TMBIM6,NDUFA13,TRAP1,BCAP31
		GO: Biological Process	GO:0001764	neuron migration		0.00442	1	0.04066	0.3757	14	160	MAPT,MEF2C,MKL2,FGFR1,HSP90AA1,YWHAE,NSMF,CTNNB1,FYN,MYH10,NRP2,PTPRZ1,NTRK2,DCLK1
		GO: Biological Process	GO:1902309	negative regulation of peptidyl-serine dephosphorylation		0.004535	1	0.04074	0.3765	2	3	YWHAE,PPP1R16B
		GO: Biological Process	GO:0006532	aspartate biosynthetic process		0.004535	1	0.04074	0.3765	2	3	GOT1,GOT2
		GO: Biological Process	GO:2000211	regulation of glutamate metabolic process		0.004535	1	0.04074	0.3765	2	3	ATCAY,APC
		GO: Biological Process	GO:0060699	regulation of endoribonuclease activity		0.004535	1	0.04074	0.3765	2	3	NPM1,TMBIM6
		GO: Biological Process	GO:0071787	endoplasmic reticulum tubular network formation		0.004535	1	0.04074	0.3765	2	3	RTN3,RTN4
		GO: Biological Process	GO:2000468	regulation of peroxidase activity		0.004535	1	0.04074	0.3765	2	3	SNCA,GSTP1
		GO: Biological Process	GO:0097212	lysosomal membrane organization		0.004535	1	0.04074	0.3765	2	3	HSPA8,ARF1
		GO: Biological Process	GO:0048371	lateral mesodermal cell differentiation		0.004535	1	0.04074	0.3765	2	3	FGFR1,BMPR1A
		GO: Biological Process	GO:0009449	gamma-aminobutyric acid biosynthetic process		0.004535	1	0.04074	0.3765	2	3	ABAT,GAD1
		GO: Biological Process	GO:0006624	vacuolar protein processing		0.004535	1	0.04074	0.3765	2	3	VPS35,LGMN
		GO: Biological Process	GO:1903334	positive regulation of protein folding		0.004535	1	0.04074	0.3765	2	3	HSPA8,PDIA3
		GO: Biological Process	GO:0032079	positive regulation of endodeoxyribonuclease activity		0.004535	1	0.04074	0.3765	2	3	RPS3,AKT1
		GO: Biological Process	GO:0033292	T-tubule organization		0.004535	1	0.04074	0.3765	2	3	ANK2,ATP2A2
		GO: Biological Process	GO:0006106	fumarate metabolic process		0.004535	1	0.04074	0.3765	2	3	GOT1,GOT2
		GO: Biological Process	GO:0061738	late endosomal microautophagy		0.004535	1	0.04074	0.3765	2	3	HSPA8,VPS4A
		GO: Biological Process	GO:0043624	cellular protein complex disassembly		0.004692	1	0.04191	0.3873	17	213	MAP1A,CFL1,MRPL30,ADD1,MTPN,MID1IP1,HSPA8,EVL,APC,NAPB,MRPL48,VPS4A,SPTAN1,SPTBN1,CAPZA2,STMN2,EIF5A
		GO: Biological Process	GO:1904063	negative regulation of cation transmembrane transport		0.004696	1	0.04191	0.3873	8	67	FKBP1A,ANK3,PPP2CA,ATP1A2,SRI,KCNAB1,CALM1,CALM2
		GO: Biological Process	GO:0051084	'de novo' posttranslational protein folding		0.004708	1	0.04191	0.3873	4	18	SELENOF,HSPA8,CCT2,HSPH1
		GO: Biological Process	GO:0031579	membrane raft organization		0.004708	1	0.04191	0.3873	4	18	DLG1,CAV2,EMP2,FLOT1
		GO: Biological Process	GO:0055119	relaxation of cardiac muscle		0.004708	1	0.04191	0.3873	4	18	PDE4B,ATP1A1,ATP1A2,ATP2A2
		GO: Biological Process	GO:0051284	positive regulation of sequestering of calcium ion		0.004708	1	0.04191	0.3873	4	18	FKBP1A,SRI,CALM1,CALM2
		GO: Biological Process	GO:0010563	negative regulation of phosphorus metabolic process		0.00481	1	0.04269	0.3944	37	599	ZFYVE1,PPP1R1B,LRRTM4,AKT1,DNAJA1,FKBP1A,EZR,APC,CHORDC1,YWHAE,PPP2CA,SIRT2,ARRB1,PPP1R16B,PRKAR1A,DYNLL1,PRKCZ,SNCA,ZMYND11,HSPH1,MPRIP,DLG1,GMFB,TESC,PID1,WNK2,NPM1,CALM1,CALM2,RGS4,CTDSP2,GSTP1,THY1,PEBP1,PAK2,SPRED1,CHP1
		GO: Biological Process	GO:0045936	negative regulation of phosphate metabolic process		0.00481	1	0.04269	0.3944	37	599	ZFYVE1,PPP1R1B,LRRTM4,AKT1,DNAJA1,FKBP1A,EZR,APC,CHORDC1,YWHAE,PPP2CA,SIRT2,ARRB1,PPP1R16B,PRKAR1A,DYNLL1,PRKCZ,SNCA,ZMYND11,HSPH1,MPRIP,DLG1,GMFB,TESC,PID1,WNK2,NPM1,CALM1,CALM2,RGS4,CTDSP2,GSTP1,THY1,PEBP1,PAK2,SPRED1,CHP1
		GO: Biological Process	GO:0017148	negative regulation of translation		0.00487	1	0.04315	0.3987	13	145	RPS3,PAIP2,CIRBP,QKI,TNRC6C,NCOR2,CELF1,DROSHA,GIGYF2,PAIP2B,CALR,PUM2,RPL13A
		GO: Biological Process	GO:0031345	negative regulation of cell projection organization		0.004912	1	0.04345	0.4015	15	179	MAP4,CYTH2,MBP,PFN2,MAP4K4,EVL,ARHGDIA,RAP1GAP2,PTPRZ1,ITM2C,RTN4,STMN2,CIT,THY1,LRP1
		GO: Biological Process	GO:0019882	antigen processing and presentation		0.004948	1	0.0437	0.4039	18	232	AP2M1,CLTC,ARF1,DYNLL2,DYNLL1,CTSL,LGMN,PSMC6,PSMD5,PSMD11,RAB6A,DYNC1H1,DYNC1I2,CALR,PDIA3,KIF3A,BCAP31,SAR1B
		GO: Biological Process	GO:0006820	anion transport		0.004955	1	0.0437	0.4039	39	641	TTYH1,RAB11B,ABAT,ACACA,SLC22A17,SLC12A5,ATP8A1,SERINC1,AKT1,PITPNB,FGFR1,PCYOX1,VDAC3,SLC36A4,NPC2,SLC1A1,SLC1A2,RAB3GAP1,ATP1A2,SNCA,SLC4A4,GABRA1,GABRB3,GABRG2,AHCYL1,MYO6,CPLX1,GLRB,SYT1,SERINC3,GOT2,CACNA1A,ACSL6,NTRK2,RTN4,GRK6,ATP9A,SLC25A22,SLC4A10
		GO: Biological Process	GO:0008637	apoptotic mitochondrial changes		0.004997	1	0.04401	0.4067	12	129	AKT1,IFIT2,ATF2,YWHAE,YWHAZ,RNF7,PPP2R2B,DYNLL2,DYNLL1,NMT1,CAMK2A,DNM1L
		GO: Biological Process	GO:0051603	proteolysis involved in cellular protein catabolic process		0.005012	1	0.04407	0.4072	40	662	HSP90B1,MARCH6,WAC,UBE2A,UBE2I,AKT1,SPOP,SDCBP,VCP,PCYOX1,SEL1L,RNF44,APC,RNF7,SIRT2,ARRB1,CSNK1E,PRKACA,UBR3,SUMO2,CTNNB1,CTSL,YME1L1,LGMN,VPS4A,PSMC6,PSMD5,PSMD11,OTUD7B,CCDC47,OS9,RBX1,TLK2,PCNP,COP1,KCTD17,BCAP31,RNF4,DYNC1LI1,CRBN
		GO: Biological Process	GO:0032770	positive regulation of monooxygenase activity		0.005074	1	0.04424	0.4088	5	29	AKT1,NOS1AP,KRAS,CALM1,CALM2
		GO: Biological Process	GO:0006896	Golgi to vacuole transport		0.005074	1	0.04424	0.4088	5	29	SORT1,RAB14,VPS13A,LAMP1,VTI1A
		GO: Biological Process	GO:0015800	acidic amino acid transport		0.005074	1	0.04424	0.4088	5	29	ABAT,SLC1A1,SLC1A2,ATP1A2,SLC25A22
		GO: Biological Process	GO:0044705	multi-organism reproductive behavior		0.005074	1	0.04424	0.4088	5	29	PPP1R1B,APLP2,APP,THRB,MAPK8IP2
		GO: Biological Process	GO:0007617	mating behavior		0.005074	1	0.04424	0.4088	5	29	PPP1R1B,APLP2,APP,THRB,MAPK8IP2
		GO: Biological Process	GO:0030834	regulation of actin filament depolymerization		0.005077	1	0.04424	0.4088	7	54	CFL1,ADD1,MTPN,EVL,SPTAN1,SPTBN1,CAPZA2
		GO: Biological Process	GO:0044743	protein transmembrane import into intracellular organelle		0.005088	1	0.04427	0.4091	6	41	TIMM23,TIMM17A,HSP90AA1,TOMM20,AFG3L2,NDUFA13
		GO: Biological Process	GO:0006937	regulation of muscle contraction		0.005208	1	0.04524	0.4181	14	163	ABAT,PDE4B,GRK2,HSP90AA1,ANK2,PRKACA,ATP1A1,ATP1A2,ATP2A2,NOS1AP,ARHGAP42,SRI,CALM1,CALM2
		GO: Biological Process	GO:0048010	vascular endothelial growth factor receptor signaling pathway		0.005248	1	0.04539	0.4195	10	98	ACTG1,HSP90AA1,CYFIP2,ELMO2,FYN,NRP2,BMPR2,RAC1,PAK2,CDC42
		GO: Biological Process	GO:0035383	thioester metabolic process		0.005248	1	0.04539	0.4195	10	98	ACACA,PDHB,ELOVL5,FASN,SNCA,SUCLA2,ACSBG1,DLD,DLST,ACSL6
		GO: Biological Process	GO:0006637	acyl-CoA metabolic process		0.005248	1	0.04539	0.4195	10	98	ACACA,PDHB,ELOVL5,FASN,SNCA,SUCLA2,ACSBG1,DLD,DLST,ACSL6
		GO: Biological Process	GO:0032092	positive regulation of protein binding		0.005324	1	0.04596	0.4247	9	83	MEF2C,ADD1,FKBP1A,MAPRE1,ARRB1,MAP1LC3B,AKTIP,FLOT1,CRBN
		GO: Biological Process	GO:0009306	protein secretion		0.00533	1	0.04596	0.4247	34	542	RAB11B,ABAT,HMGB1,SELENOK,CADM1,MAP4K4,CX3CL1,EZR,VIP,VSNL1,ARF1,ARRB1,VPS35,PRKCZ,RIMS2,ILDR2,MYO5A,SPTBN1,SRI,CPLX1,NCL,ITPR2,PTPRN2,KIF5B,CACNA1A,GPLD1,RAP1A,PCLO,RAPGEF4,DNM1L,TVP23B,TMBIM6,OXCT1,ENSA
		GO: Biological Process	GO:0051169	nuclear transport		0.005356	1	0.04611	0.4261	32	502	CFL1,RPS15,U2AF2,RPL23,AKT1,HSPA8,HSP90AA1,SRSF3,SRSF5,IPO8,SRSF7,PPP1CC,PPP2CA,RGS20,IPO9,PRKACA,CTNNB1,CHTOP,MXI1,AHCYL1,SPTBN1,SRI,BMPR1A,NPM1,CALR,CAMK4,PDIA3,PSIP1,UHMK1,EIF5A,NUTF2,CHP1
		GO: Biological Process	GO:0051347	positive regulation of transferase activity		0.005401	1	0.04644	0.4291	40	665	RPS3,HMGB1,ADCY1,KIDINS220,UBE2I,SERINC1,AKT1,FGFR1,SDC4,VLDLR,MAGED1,HACD3,NEK7,CCT2,PPP2CA,ARRB1,PRKACA,PRKAR1A,PRKCZ,CTNNB1,SNCA,HSPH1,PSMC6,PSMD5,PSMD11,DCUN1D4,ZEB2,DLG1,RAC1,KRAS,NPM1,RAP1A,CALM1,CALM2,SPAG9,EEF1A2,PAK2,EMP2,CDC42,MAPK8IP2
		GO: Biological Process	GO:0034660	ncRNA metabolic process		0.005444	1	0.04674	0.4319	35	563	RPL30,RPL27A,RPL35A,RPL36A,RPS3,RPS5,RPS6,RPS15,RPS15A,RPS17,RPS19,RPS21,RPS23,RPS24,RPL23,RPL7L1,DROSHA,CSNK1E,DARS,NCL,PAPD5,RPRD1A,RPL13A,RPL3,RPL4,RPL5,RPL6,RPL7A,RPL9,RPL11,RPL12,RPL13,RPL17,RPL18,RPL19
		GO: Biological Process	GO:0001503	ossification		0.005484	1	0.04701	0.4344	27	404	PENK,RPS15,MEF2C,MEF2D,SORT1,FASN,CLTC,AKT1,FGFR1,NOCT,PLXNB1,MIA3,APC,PRKACA,CTNNB1,ATP5F1B,ATP6AP1,DHX9,PTN,BMPR1A,BMPR2,CCDC47,TAC1,GPLD1,THRB,TMSB4X,H3F3B
		GO: Biological Process	GO:0008361	regulation of cell size		0.005577	1	0.04774	0.4411	16	199	MAPT,CFL1,ADD1,AKT1,HSP90AA1,EZR,ARHGAP5,RAB21,ATP2B2,RAP1GAP2,BMPR2,RAC1,NPM1,RTN4,EIF4G2,RPL4
		GO: Biological Process	GO:0002790	peptide secretion		0.005603	1	0.04789	0.4425	21	290	RAB11B,ABAT,MAP4K4,VIP,VSNL1,ARRB1,RIMS2,ILDR2,MYO5A,SRI,CPLX1,ITPR2,PTPRN2,KIF5B,CACNA1A,GPLD1,RAP1A,PCLO,RAPGEF4,OXCT1,ENSA
		GO: Biological Process	GO:0002768	immune response-regulating cell surface receptor signaling pathway		0.005624	1	0.04799	0.4435	25	366	PDE4B,ACTG1,RFTN2,MEF2C,HSP90AA1,EZR,CYFIP2,ELMO2,PRKACA,FYN,MYO10,PSMC6,PSMD5,PSMD11,RAC1,KRAS,GPLD1,CALM1,CALM2,GRB2,SLC39A10,THY1,PAK2,PLEKHA1,CDC42
		GO: Biological Process	GO:0034284	response to monosaccharide		0.005641	1	0.04802	0.4437	17	217	RAB11B,HNRNPK,MAP4K4,VSNL1,PPP2CA,ARRB1,PRKACA,ILDR2,SRI,PTPRN2,PLCB1,KIF5B,GPLD1,RAP1A,GSTP1,OXCT1,ENSA
		GO: Biological Process	GO:0007018	microtubule-based movement		0.005643	1	0.04802	0.4437	18	235	MAP4,MAPT,AP2M1,APP,SSX2IP,DYNLL1,PRKCZ,RAB21,KIF1B,KIF5B,KIF5C,RAB6A,DYNC1H1,DYNC1I2,LAMP1,KIF3A,DYNC1LI1,CDC42
		GO: Biological Process	GO:0010658	striated muscle cell apoptotic process		0.005742	1	0.04879	0.4508	6	42	QKI,HSPA8,HSP90AA1,NACA,CAMK2A,EIF5A
		GO: Biological Process	GO:1900006	positive regulation of dendrite development		0.00576	1	0.04886	0.4515	9	84	HNRNPK,VLDLR,ARF1,RAB21,PTPRD,PTPRZ1,KALRN,CAMK2B,EIF4G2
		GO: Biological Process	GO:0031116	positive regulation of microtubule polymerization		0.00578	1	0.04889	0.4518	4	19	MAPT,RPS3,APC,GDA
		GO: Biological Process	GO:0042053	regulation of dopamine metabolic process		0.00578	1	0.04889	0.4518	4	19	ABAT,PDE1B,SNCA,EPAS1
		GO: Biological Process	GO:0051051	negative regulation of transport		0.005819	1	0.04915	0.4542	33	525	ABAT,MAPT,HMGB1,AKT1,MAP4K4,CX3CL1,FKBP1A,SDCBP,EZR,VIP,VSNL1,ANK3,SAR1A,PPP2CA,VPS35,ATP1A2,SNCA,MXI1,SNPH,SRI,KCNAB1,OS9,DLG4,PID1,RAC1,RAP1A,RAP1B,CALM1,CALM2,GRK6,TMBIM6,CRBN,CHP1
		GO: Biological Process	GO:0046578	regulation of Ras protein signal transduction		0.005848	1	0.04929	0.4554	16	200	CYTH2,PREX1,ARHGDIA,ARRB1,SSX2IP,ARHGAP42,ARPP19,PSD,ARHGEF9,RAC1,KRAS,KALRN,PSD3,RASGEF1A,FLOT1,SPATA13
		GO: Biological Process	GO:0043523	regulation of neuron apoptotic process		0.005892	1	0.04929	0.4554	18	236	MEF2C,ATF2,PPP2R2B,NSMF,DNAJC5,CTNNB1,SNCA,FYN,GABRB3,LGMN,HSPH1,KRAS,CACNA1A,NPM1,NTRK2,UBE2M,LRP1,CDC42
		GO: Biological Process	GO:1900739	regulation of protein insertion into mitochondrial membrane involved in apoptotic signaling pathway		0.005895	1	0.04929	0.4554	5	30	YWHAE,YWHAZ,DYNLL2,DYNLL1,NMT1
		GO: Biological Process	GO:0090075	relaxation of muscle		0.005895	1	0.04929	0.4554	5	30	PDE4B,ATP1A1,ATP1A2,ATP2A2,SRI
		GO: Biological Process	GO:1900740	positive regulation of protein insertion into mitochondrial membrane involved in apoptotic signaling pathway		0.005895	1	0.04929	0.4554	5	30	YWHAE,YWHAZ,DYNLL2,DYNLL1,NMT1
		GO: Biological Process	GO:0005980	glycogen catabolic process		0.005895	1	0.04929	0.4554	5	30	HMGB1,GAA,PYGB,CALM1,CALM2
		GO: Biological Process	GO:0006376	mRNA splice site selection		0.005895	1	0.04929	0.4554	5	30	SRSF5,SF1,CELF1,LUC7L2,PSIP1
		GO: Biological Process	GO:0001765	membrane raft assembly		0.005944	1	0.04935	0.456	3	10	CAV2,EMP2,FLOT1
		GO: Biological Process	GO:0019732	antifungal humoral response		0.005944	1	0.04935	0.456	3	10	VIP,APP,TAC1
		GO: Biological Process	GO:0034063	stress granule assembly		0.005944	1	0.04935	0.456	3	10	CIRBP,DYNC1H1,PUM2
		GO: Biological Process	GO:0051938	L-glutamate import		0.005944	1	0.04935	0.456	3	10	SLC1A1,SLC1A2,ATP1A2
		GO: Biological Process	GO:0046322	negative regulation of fatty acid oxidation		0.005944	1	0.04935	0.456	3	10	ACADL,AKT1,DBI
		GO: Biological Process	GO:0035725	sodium ion transmembrane transport		0.005995	1	0.0497	0.4592	12	132	ANK3,ARF1,ATP1A1,ATP1A2,SLC4A4,PLCB1,SLC9A7,DLG1,TESC,KIF5B,WNK2,CHP1
		GO: Biological Process	GO:0060078	regulation of postsynaptic membrane potential		0.00605	1	0.05008	0.4627	10	100	ABAT,MEF2C,CX3CL1,RAB3GAP1,PRKCZ,SNCA,RIMS2,GABRB3,DLG4,MAPK8IP2
		GO: Biological Process	GO:0044070	regulation of anion transport		0.006104	1	0.05022	0.464	14	166	TTYH1,RAB11B,ABAT,ATP8A1,AKT1,VDAC3,RAB3GAP1,ATP1A2,SNCA,AHCYL1,CACNA1A,ACSL6,RTN4,GRK6
		GO: Biological Process	GO:0043409	negative regulation of MAPK cascade		0.006104	1	0.05022	0.464	14	166	AKT1,DNAJA1,EZR,APC,PPP2CA,ARRB1,ZMYND11,HSPH1,DLG1,WNK2,RGS4,GSTP1,PEBP1,SPRED1
		GO: Biological Process	GO:0002478	antigen processing and presentation of exogenous peptide antigen		0.006104	1	0.05022	0.464	14	166	AP2M1,CLTC,ARF1,DYNLL2,DYNLL1,CTSL,LGMN,PSMC6,PSMD5,PSMD11,DYNC1H1,DYNC1I2,KIF3A,SAR1B
		GO: Biological Process	GO:0071322	cellular response to carbohydrate stimulus		0.00611	1	0.05022	0.464	13	149	RAB11B,HNRNPK,MAP4K4,VSNL1,PPP2CA,ARRB1,PRKACA,SRI,PTPRN2,KIF5B,GPLD1,RAP1A,OXCT1
		GO: Biological Process	GO:0060402	calcium ion transport into cytosol		0.00611	1	0.05022	0.464	13	149	FKBP1A,ANK2,PRKACA,ATP1A2,SNCA,MYO5A,SRI,DBI,ITPR2,CALM1,CALM2,THY1,JPH3
		GO: Biological Process	GO:0031647	regulation of protein stability		0.00615	1	0.05047	0.4664	18	237	PFN2,HSPA8,HSP90AA1,SEL1L,ANK2,CCT2,RAB3GAP1,IPO9,CCT5,VPS35,SNCA,TESC,KRAS,NPM1,CALR,LAMP1,CDC42,CHP1
		GO: Biological Process	GO:0045859	regulation of protein kinase activity		0.006193	1	0.05057	0.4673	45	775	RPS3,HMGB1,ADCY1,KIDINS220,PPP1R1B,LRRTM4,AKT1,FGFR1,DNAJA1,SDC4,VLDLR,MAGED1,HACD3,APC,BCCIP,APLP2,CHORDC1,APP,PPP2CA,ARRB1,PRKACA,PRKAR1A,PRKCZ,SNCA,HSPH1,ZEB2,DLG1,GMFB,TESC,KRAS,NPM1,RAP1A,CALM1,CALM2,SPAG9,RGS4,CCNG1,GSTP1,THY1,PAK2,SPRED1,EMP2,CDC42,MAPK8IP2,CHP1
		GO: Biological Process	GO:0010257	NADH dehydrogenase complex assembly		0.006214	1	0.05057	0.4673	7	56	NDUFA8,NDUFA9,NDUFB8,NDUFB9,NDUFS4,NDUFV2,NDUFA13
		GO: Biological Process	GO:0032981	mitochondrial respiratory chain complex I assembly		0.006214	1	0.05057	0.4673	7	56	NDUFA8,NDUFA9,NDUFB8,NDUFB9,NDUFS4,NDUFV2,NDUFA13
		GO: Biological Process	GO:0080171	lytic vacuole organization		0.006214	1	0.05057	0.4673	7	56	ACP2,HSPA8,CHMP5,RAB14,ARF1,GAA,AKTIP
		GO: Biological Process	GO:0007040	lysosome organization		0.006214	1	0.05057	0.4673	7	56	ACP2,HSPA8,CHMP5,RAB14,ARF1,GAA,AKTIP
		GO: Biological Process	GO:0009066	aspartate family amino acid metabolic process		0.006214	1	0.05057	0.4673	7	56	ASRGL1,SMS,AHCYL1,DLD,DLST,GOT1,GOT2
		GO: Biological Process	GO:0042180	cellular ketone metabolic process		0.006331	1	0.05145	0.4754	19	256	ACADL,PDHB,MID1IP1,AKT1,COQ5,ATCAY,APC,NCOR2,SNCA,PSMC6,PSMD5,PSMD11,DBI,NDUFA9,GLO1,DLD,GOT2,OXCT1,INSIG2
		GO: Biological Process	GO:1903650	negative regulation of cytoplasmic transport		0.006361	1	0.05162	0.477	12	133	FKBP1A,SAR1A,PPP2CA,VPS35,MXI1,SRI,OS9,RAP1A,RAP1B,CALM1,CALM2,CHP1
		GO: Biological Process	GO:0048284	organelle fusion		0.006421	1	0.05204	0.4808	16	202	RABGAP1,STX7,RPH3A,VAMP4,LIX1,TBC1D9B,SNPH,VPS4A,AFG3L2,VAMP1,SYT1,KIF5B,PID1,VTI1A,CAV2,STX6
		GO: Biological Process	GO:0001662	behavioral fear response		0.006456	1	0.05224	0.4827	6	43	PENK,MEF2C,VDAC3,DBI,KALRN,MAPK8IP2
		GO: Biological Process	GO:0002429	immune response-activating cell surface receptor signaling pathway		0.006542	1	0.05287	0.4885	23	332	PDE4B,ACTG1,RFTN2,MEF2C,HSP90AA1,EZR,CYFIP2,ELMO2,PRKACA,FYN,MYO10,PSMC6,PSMD5,PSMD11,RAC1,KRAS,GPLD1,GRB2,SLC39A10,THY1,PAK2,PLEKHA1,CDC42
		GO: Biological Process	GO:0010657	muscle cell apoptotic process		0.00668	1	0.05391	0.4981	8	71	RBM10,QKI,HSPA8,HSP90AA1,ARRB1,NACA,CAMK2A,EIF5A
		GO: Biological Process	GO:0009156	ribonucleoside monophosphate biosynthetic process		0.006714	1	0.05411	0.5	9	86	AK4,ATP5PD,VCP,ATP5F1A,ATP5F1B,ATP5PF,CHCHD10,PID1,ATP6V0A2
		GO: Biological Process	GO:0045807	positive regulation of endocytosis		0.006744	1	0.0542	0.5008	12	134	HNRNPK,ADD1,HSPA8,ARF1,ARRB1,SNCA,RAB21,RAP1A,CALR,SYNE1,KIF3A,FLOT1
		GO: Biological Process	GO:0051017	actin filament bundle assembly		0.006744	1	0.0542	0.5008	12	134	HSP90B1,PFN2,ADD1,SDC4,EZR,EVL,GAS7,SORBS1,ARRB1,TAC1,RAC1,CDC42
		GO: Biological Process	GO:0009251	glucan catabolic process		0.006805	1	0.05453	0.5039	5	31	HMGB1,GAA,PYGB,CALM1,CALM2
		GO: Biological Process	GO:0044247	cellular polysaccharide catabolic process		0.006805	1	0.05453	0.5039	5	31	HMGB1,GAA,PYGB,CALM1,CALM2
		GO: Biological Process	GO:0048872	homeostasis of number of cells		0.006973	1	0.05558	0.5136	20	277	PDE4B,RPS6,RPS17,HMGB1,RPS19,RPS24,MEF2C,ADD1,PKNOX1,AKT1,SLC40A1,GIGYF2,ILDR2,UBAP2L,PLCB1,RAC1,KRAS,KIF3A,RPA1,EPAS1
		GO: Biological Process	GO:0051016	barbed-end actin filament capping		0.007003	1	0.05558	0.5136	4	20	ADD1,MTPN,EVL,CAPZA2
		GO: Biological Process	GO:0000028	ribosomal small subunit assembly		0.007003	1	0.05558	0.5136	4	20	RPS5,RPS15,RPS17,RPS19
		GO: Biological Process	GO:1903859	regulation of dendrite extension		0.007003	1	0.05558	0.5136	4	20	HNRNPK,CPNE5,RIMS2,SYT1
		GO: Biological Process	GO:1903861	positive regulation of dendrite extension		0.007003	1	0.05558	0.5136	4	20	HNRNPK,CPNE5,RIMS2,SYT1
		GO: Biological Process	GO:0042069	regulation of catecholamine metabolic process		0.007003	1	0.05558	0.5136	4	20	ABAT,PDE1B,SNCA,EPAS1
		GO: Biological Process	GO:0098901	regulation of cardiac muscle cell action potential		0.007003	1	0.05558	0.5136	4	20	ANK2,ANK3,ATP2A2,NOS1AP
		GO: Biological Process	GO:0006813	potassium ion transport		0.007041	1	0.05573	0.515	17	222	SLC12A5,VIP,DPP10,ANK2,ANK3,HBP1,YWHAE,ATP1A1,ATP1A2,NOS1AP,SLC9A7,KCNAB1,DLG1,KIF5B,NSF,MTMR6,CHP1
		GO: Biological Process	GO:0032872	regulation of stress-activated MAPK cascade		0.007041	1	0.05573	0.515	17	222	RPS3,HMGB1,AKT1,DNAJA1,MAP4K4,SDCBP,EZR,HACD3,ZMYND11,HSPH1,ZEB2,PLCB1,DLG1,SPAG9,GSTP1,CDC42,MAPK8IP2
		GO: Biological Process	GO:0006906	vesicle fusion		0.007196	1	0.05677	0.5246	13	152	RABGAP1,STX7,RPH3A,VAMP4,TBC1D9B,SNPH,VPS4A,VAMP1,SYT1,KIF5B,VTI1A,CAV2,STX6
		GO: Biological Process	GO:0051281	positive regulation of release of sequestered calcium ion into cytosol		0.007232	1	0.05677	0.5246	6	44	SNCA,SRI,DBI,CALM1,CALM2,THY1
		GO: Biological Process	GO:0032781	positive regulation of ATPase activity		0.007232	1	0.05677	0.5246	6	44	PFN2,TOR1AIP1,CHTOP,DNAJB11,RAB6A,DNAJB6
		GO: Biological Process	GO:1901998	toxin transport		0.007232	1	0.05677	0.5246	6	44	TRIP4,DNAJA1,CCT2,CCT5,VAMP4,DNM1
		GO: Biological Process	GO:0030835	negative regulation of actin filament depolymerization		0.007232	1	0.05677	0.5246	6	44	ADD1,MTPN,EVL,SPTAN1,SPTBN1,CAPZA2
		GO: Biological Process	GO:0002209	behavioral defense response		0.007232	1	0.05677	0.5246	6	44	PENK,MEF2C,VDAC3,DBI,KALRN,MAPK8IP2
		GO: Biological Process	GO:0070302	regulation of stress-activated protein kinase signaling cascade		0.007353	1	0.05765	0.5327	17	223	RPS3,HMGB1,AKT1,DNAJA1,MAP4K4,SDCBP,EZR,HACD3,ZMYND11,HSPH1,ZEB2,PLCB1,DLG1,SPAG9,GSTP1,CDC42,MAPK8IP2
		GO: Biological Process	GO:0009896	positive regulation of catabolic process		0.00751	1	0.0588	0.5433	27	414	HMGB1,WAC,AKT1,VCP,EZR,VIP,SPTLC2,TMEM59,APC,TNRC6C,PABPC1,RAB3GAP1,SIRT2,CSNK1E,SUMO2,WDFY3,SNCA,PSMC6,PSMD5,PSMD11,RAB12,GPLD1,NSF,COP1,NDUFA13,BCAP31,PAFAH1B2
		GO: Biological Process	GO:0030042	actin filament depolymerization		0.007531	1	0.05888	0.5441	7	58	CFL1,ADD1,MTPN,EVL,SPTAN1,SPTBN1,CAPZA2
		GO: Biological Process	GO:0006913	nucleocytoplasmic transport		0.007541	1	0.05889	0.5441	31	494	CFL1,RPS15,U2AF2,RPL23,AKT1,HSPA8,HSP90AA1,SRSF3,SRSF5,IPO8,SRSF7,PPP1CC,PPP2CA,RGS20,IPO9,PRKACA,CTNNB1,CHTOP,MXI1,AHCYL1,SPTBN1,SRI,BMPR1A,NPM1,CALR,CAMK4,PDIA3,UHMK1,EIF5A,NUTF2,CHP1
		GO: Biological Process	GO:0060560	developmental growth involved in morphogenesis		0.007579	1	0.0591	0.5461	18	242	MAPT,NRN1,HNRNPK,CADM1,PLXNB1,APP,CPNE5,PRKCZ,RAB21,RIMS2,ZEB2,NRP2,BMPR2,SYT1,RTN4,EIF4G2,RPL4,DCLK1
		GO: Biological Process	GO:0050770	regulation of axonogenesis		0.007649	1	0.05948	0.5497	15	188	MAP2,MAPT,MBP,CHN1,PLXNB1,ARHGDIA,RAB21,ZEB2,BMPR2,CACNA1A,NTRK2,RTN4,THY1,EIF4G2,RPL4
		GO: Biological Process	GO:0051168	nuclear export		0.007649	1	0.05948	0.5497	15	188	RPS15,U2AF2,SRSF3,SRSF5,SRSF7,PRKACA,CHTOP,AHCYL1,NPM1,CALR,CAMK4,UHMK1,EIF5A,NUTF2,CHP1
		GO: Biological Process	GO:0038093	Fc receptor signaling pathway		0.007704	1	0.05983	0.5529	16	206	ACTG1,HSP90AA1,CYFIP2,ELMO2,FYN,MYO10,PSMC6,PSMD5,PSMD11,RAC1,KRAS,CALM1,CALM2,GRB2,PAK2,CDC42
		GO: Biological Process	GO:0051402	neuron apoptotic process		0.00773	1	0.05996	0.554	19	261	MEF2C,APP,ATF2,PPP2R2B,NSMF,DNAJC5,CTNNB1,SNCA,FYN,GABRB3,LGMN,HSPH1,KRAS,CACNA1A,NPM1,NTRK2,UBE2M,LRP1,CDC42
		GO: Biological Process	GO:0048013	ephrin receptor signaling pathway		0.007785	1	0.06022	0.5565	9	88	ACTG1,CHN1,AP2M1,SDCBP,FYN,DNM1,RAC1,KALRN,CDC42
		GO: Biological Process	GO:0007616	long-term memory		0.007808	1	0.06022	0.5565	5	32	ADCY1,PRKCZ,TAC1,CAMK4,NTRK2
		GO: Biological Process	GO:0001844	protein insertion into mitochondrial membrane involved in apoptotic signaling pathway		0.007808	1	0.06022	0.5565	5	32	YWHAE,YWHAZ,DYNLL2,DYNLL1,NMT1
		GO: Biological Process	GO:0071870	cellular response to catecholamine stimulus		0.007808	1	0.06022	0.5565	5	32	PDE4B,APP,SIRT2,PRKACA,SNCA
		GO: Biological Process	GO:0007204	positive regulation of cytosolic calcium ion concentration		0.007817	1	0.06022	0.5565	20	280	HMGB1,FKBP1A,ANK2,NPTN,PRKACA,ATP1A2,SNCA,MYO5A,SRI,DBI,ITPR2,DLG4,TAC1,CACNA1A,CALM1,CALM2,BCAP31,THY1,EIF5A,JPH3
		GO: Biological Process	GO:0034776	response to histamine		0.007936	1	0.06066	0.5605	3	11	GABRA1,GABRB3,GABRG2
		GO: Biological Process	GO:0015810	aspartate transmembrane transport		0.007936	1	0.06066	0.5605	3	11	ABAT,SLC1A1,SLC1A2
		GO: Biological Process	GO:0090161	Golgi ribbon formation		0.007936	1	0.06066	0.5605	3	11	VAMP4,VTI1A,STX6
		GO: Biological Process	GO:0031115	negative regulation of microtubule polymerization		0.007936	1	0.06066	0.5605	3	11	MAPRE1,SNCA,STMN2
		GO: Biological Process	GO:0034975	protein folding in endoplasmic reticulum		0.007936	1	0.06066	0.5605	3	11	HSP90B1,CALR,PDIA3
		GO: Biological Process	GO:0007016	cytoskeletal anchoring at plasma membrane		0.007936	1	0.06066	0.5605	3	11	EZR,ANK3,PIP5K1C
		GO: Biological Process	GO:0010564	regulation of cell cycle process		0.007949	1	0.06067	0.5607	36	598	AKT1,FGFR1,SFPQ,CHMP5,APC,CHORDC1,SYF2,APP,SIRT2,PRKACA,PRKAR1A,ANKRD17,GIGYF2,CTNNB1,STAG2,ATRX,VPS4A,PSMC6,PSMD5,PSMD11,PLCB1,PID1,NPM1,CALM1,CALM2,CALR,CAMK2B,CAV2,CIT,CTDSP2,CCNG1,RNF4,PEBP1,DYNC1LI1,CDC42,RPL17
		GO: Biological Process	GO:0090174	organelle membrane fusion		0.008	1	0.06091	0.5628	13	154	RABGAP1,STX7,RPH3A,VAMP4,TBC1D9B,SNPH,VPS4A,VAMP1,SYT1,KIF5B,VTI1A,CAV2,STX6
		GO: Biological Process	GO:0034249	negative regulation of cellular amide metabolic process		0.008	1	0.06091	0.5628	13	154	RPS3,PAIP2,CIRBP,QKI,TNRC6C,NCOR2,CELF1,DROSHA,GIGYF2,PAIP2B,CALR,PUM2,RPL13A
		GO: Biological Process	GO:2001259	positive regulation of cation channel activity		0.008073	1	0.0613	0.5664	6	45	ANK2,ANK3,NOS1AP,KIF5B,CALM1,CALM2
		GO: Biological Process	GO:0051445	regulation of meiotic cell cycle		0.008073	1	0.0613	0.5664	6	45	SIRT2,PRKACA,PRKAR1A,PLCB1,CALR,CAMK2B
		GO: Biological Process	GO:0006275	regulation of DNA replication		0.008267	1	0.06269	0.5793	14	172	FGFR1,NEK7,CCT2,PPP2CA,CCT5,ANKRD17,CTNNB1,STAG2,ATRX,PID1,RAC1,NPM1,CALR,CDC42
		GO: Biological Process	GO:0042552	myelination		0.008319	1	0.06285	0.5808	11	121	MBP,AKT1,QKI,ANK2,SIRT2,CTNNB1,FYN,MYO5A,ACSBG1,AFG3L2,DLG1
		GO: Biological Process	GO:0042455	ribonucleoside biosynthetic process		0.008319	1	0.06285	0.5808	11	121	ACACA,MAT2A,AK4,ATP5PD,VCP,ATP5F1A,ATP5F1B,ATP5PF,CHCHD10,PID1,ATP6V0A2
		GO: Biological Process	GO:0048814	regulation of dendrite morphogenesis		0.008368	1	0.06285	0.5808	9	89	CFL1,NSMF,RAB21,PTPRD,PTPRZ1,KALRN,CAMK2B,SYNE1,CIT
		GO: Biological Process	GO:0071305	cellular response to vitamin D		0.008386	1	0.06285	0.5808	4	21	PENK,ATP2B1,PTN,PDIA3
		GO: Biological Process	GO:0010523	negative regulation of calcium ion transport into cytosol		0.008386	1	0.06285	0.5808	4	21	FKBP1A,SRI,CALM1,CALM2
		GO: Biological Process	GO:0042762	regulation of sulfur metabolic process		0.008386	1	0.06285	0.5808	4	21	PDHB,CTNNB1,SNCA,DLD
		GO: Biological Process	GO:0006103	2-oxoglutarate metabolic process		0.008386	1	0.06285	0.5808	4	21	DLD,DLST,GOT1,GOT2
		GO: Biological Process	GO:0060080	inhibitory postsynaptic potential		0.008386	1	0.06285	0.5808	4	21	ABAT,CX3CL1,RIMS2,GABRB3
		GO: Biological Process	GO:0010661	positive regulation of muscle cell apoptotic process		0.008386	1	0.06285	0.5808	4	21	RBM10,ARRB1,CAMK2A,EIF5A
		GO: Biological Process	GO:0061572	actin filament bundle organization		0.008462	1	0.06326	0.5845	12	138	HSP90B1,PFN2,ADD1,SDC4,EZR,EVL,GAS7,SORBS1,ARRB1,TAC1,RAC1,CDC42
		GO: Biological Process	GO:0009108	coenzyme biosynthetic process		0.008462	1	0.06326	0.5845	12	138	GPHN,ACACA,PDHB,MAT2A,ELOVL5,FASN,COQ5,SNCA,NDUFA9,ACSBG1,DLD,ACSL6
		GO: Biological Process	GO:0046777	protein autophosphorylation		0.008558	1	0.06389	0.5904	18	245	AKT1,FGFR1,HSPA8,PPP2CA,PRKACA,FYN,PRKX,WNK2,CALM1,CALM2,CAMK4,CAMK2A,CAMK2B,NTRK2,THY1,UHMK1,PAK2,CHP1
		GO: Biological Process	GO:0019884	antigen processing and presentation of exogenous antigen		0.00868	1	0.06413	0.5926	14	173	AP2M1,CLTC,ARF1,DYNLL2,DYNLL1,CTSL,LGMN,PSMC6,PSMD5,PSMD11,DYNC1H1,DYNC1I2,KIF3A,SAR1B
		GO: Biological Process	GO:0044106	cellular amine metabolic process		0.008795	1	0.06413	0.5926	16	209	ABAT,PDE1B,SPTLC2,ATCAY,APC,SMS,SNCA,ABHD3,PSMC6,PSMD5,PSMD11,DBI,SARDH,GPLD1,PEBP1,EPAS1
		GO: Biological Process	GO:0070777	D-aspartate transport		0.008828	1	0.06413	0.5926	2	4	SLC1A1,SLC1A2
		GO: Biological Process	GO:1902822	regulation of late endosome to lysosome transport		0.008828	1	0.06413	0.5926	2	4	ARF1,VPS35
		GO: Biological Process	GO:0043622	cortical microtubule organization		0.008828	1	0.06413	0.5926	2	4	EZR,DLG1
		GO: Biological Process	GO:0097112	gamma-aminobutyric acid receptor clustering		0.008828	1	0.06413	0.5926	2	4	GPHN,GLRB
		GO: Biological Process	GO:0048370	lateral mesoderm formation		0.008828	1	0.06413	0.5926	2	4	FGFR1,BMPR1A
		GO: Biological Process	GO:1990573	potassium ion import across plasma membrane		0.008828	1	0.06413	0.5926	2	4	ATP1A1,ATP1A2
		GO: Biological Process	GO:1903553	positive regulation of extracellular exosome assembly		0.008828	1	0.06413	0.5926	2	4	SDC4,SDCBP
		GO: Biological Process	GO:1903751	negative regulation of intrinsic apoptotic signaling pathway in response to hydrogen peroxide		0.008828	1	0.06413	0.5926	2	4	HSPH1,TRAP1
		GO: Biological Process	GO:0051660	establishment of centrosome localization		0.008828	1	0.06413	0.5926	2	4	EZR,DLG1
		GO: Biological Process	GO:0007621	negative regulation of female receptivity		0.008828	1	0.06413	0.5926	2	4	PPP1R1B,THRB
		GO: Biological Process	GO:1901856	negative regulation of cellular respiration		0.008828	1	0.06413	0.5926	2	4	SNCA,TRAP1
		GO: Biological Process	GO:0048369	lateral mesoderm morphogenesis		0.008828	1	0.06413	0.5926	2	4	FGFR1,BMPR1A
		GO: Biological Process	GO:1990791	dorsal root ganglion development		0.008828	1	0.06413	0.5926	2	4	CTNNB1,NRP2
		GO: Biological Process	GO:1903750	regulation of intrinsic apoptotic signaling pathway in response to hydrogen peroxide		0.008828	1	0.06413	0.5926	2	4	HSPH1,TRAP1
		GO: Biological Process	GO:0070779	D-aspartate import across plasma membrane		0.008828	1	0.06413	0.5926	2	4	SLC1A1,SLC1A2
		GO: Biological Process	GO:0090427	activation of meiosis		0.008828	1	0.06413	0.5926	2	4	PLCB1,CAMK2B
		GO: Biological Process	GO:0006533	aspartate catabolic process		0.008828	1	0.06413	0.5926	2	4	GOT1,GOT2
		GO: Biological Process	GO:0032077	positive regulation of deoxyribonuclease activity		0.008828	1	0.06413	0.5926	2	4	RPS3,AKT1
		GO: Biological Process	GO:2001270	regulation of cysteine-type endopeptidase activity involved in execution phase of apoptosis		0.008828	1	0.06413	0.5926	2	4	RPS3,PAK2
		GO: Biological Process	GO:0010762	regulation of fibroblast migration		0.008911	1	0.06413	0.5926	5	33	AKT1,FGFR1,SDC4,C5orf30,RAC1
		GO: Biological Process	GO:0040020	regulation of meiotic nuclear division		0.008911	1	0.06413	0.5926	5	33	SIRT2,PRKAR1A,PLCB1,CALR,CAMK2B
		GO: Biological Process	GO:0000272	polysaccharide catabolic process		0.008911	1	0.06413	0.5926	5	33	HMGB1,GAA,PYGB,CALM1,CALM2
		GO: Biological Process	GO:0030866	cortical actin cytoskeleton organization		0.008911	1	0.06413	0.5926	5	33	FMNL2,EZR,DLG1,CALR,EPB41L2
		GO: Biological Process	GO:0071868	cellular response to monoamine stimulus		0.008911	1	0.06413	0.5926	5	33	PDE4B,APP,SIRT2,PRKACA,SNCA
		GO: Biological Process	GO:0033120	positive regulation of RNA splicing		0.008911	1	0.06413	0.5926	5	33	U2AF2,HNRNPK,HSPA8,THRAP3,CELF3
		GO: Biological Process	GO:0006929	substrate-dependent cell migration		0.008911	1	0.06413	0.5926	5	33	FGFR1,SDCBP,ATP5F1B,MYH10,NRP2
		GO: Biological Process	GO:0051204	protein insertion into mitochondrial membrane		0.008911	1	0.06413	0.5926	5	33	YWHAE,YWHAZ,DYNLL2,DYNLL1,NMT1
		GO: Biological Process	GO:1902652	secondary alcohol metabolic process		0.008941	1	0.06426	0.5938	12	139	ACADL,MSMO1,FGFR1,VLDLR,APLP2,NPC2,APP,CNBP,DHCR7,THRB,LRP1,INSIG2
		GO: Biological Process	GO:0060563	neuroepithelial cell differentiation		0.008982	1	0.06448	0.5958	9	90	MEF2C,FGFR1,BCCIP,KDM2A,ATP2B2,MYO5A,MYO6,ZEB2,RAC1
		GO: Biological Process	GO:1902108	regulation of mitochondrial membrane permeability involved in apoptotic process		0.009044	1	0.06484	0.5992	7	60	ATF2,YWHAE,YWHAZ,DYNLL2,DYNLL1,NMT1,CAMK2A
		GO: Biological Process	GO:0060491	regulation of cell projection assembly		0.009109	1	0.06515	0.602	14	174	MAP4,RABGAP1,PFN2,HSP90AA1,VDAC3,EVL,APC,PPP1R16B,TBC1D9B,GAP43,MYO10,RAC1,KCTD17,CDC42
		GO: Biological Process	GO:0006986	response to unfolded protein		0.009109	1	0.06515	0.602	14	174	HSP90B1,ADD1,DNAJA1,SEC61A1,HSPA8,VCP,HSP90AA1,DNAJB11,HSPH1,MANF,CALR,TMBIM6,CTDSP2,SEC63
		GO: Biological Process	GO:0007272	ensheathment of neurons		0.009361	1	0.06679	0.6172	11	123	MBP,AKT1,QKI,ANK2,SIRT2,CTNNB1,FYN,MYO5A,ACSBG1,AFG3L2,DLG1
		GO: Biological Process	GO:0008366	axon ensheathment		0.009361	1	0.06679	0.6172	11	123	MBP,AKT1,QKI,ANK2,SIRT2,CTNNB1,FYN,MYO5A,ACSBG1,AFG3L2,DLG1
		GO: Biological Process	GO:0002433	immune response-regulating cell surface receptor signaling pathway involved in phagocytosis		0.00963	1	0.06854	0.6333	9	91	ACTG1,HSP90AA1,CYFIP2,ELMO2,FYN,MYO10,RAC1,GRB2,CDC42
		GO: Biological Process	GO:0038096	Fc-gamma receptor signaling pathway involved in phagocytosis		0.00963	1	0.06854	0.6333	9	91	ACTG1,HSP90AA1,CYFIP2,ELMO2,FYN,MYO10,RAC1,GRB2,CDC42
		GO: Biological Process	GO:0000398	mRNA splicing, via spliceosome		0.009715	1	0.06897	0.6373	21	305	RBM10,U2AF2,HNRNPK,HSPA8,SFPQ,SRSF3,SRSF5,SRSF7,SYF2,PABPC1,SF1,CELF1,LUC7L2,FUS,DHX9,THRAP3,NPM1,UBL5,PSIP1,CELF3,UHMK1
		GO: Biological Process	GO:0000377	RNA splicing, via transesterification reactions with bulged adenosine as nucleophile		0.009715	1	0.06897	0.6373	21	305	RBM10,U2AF2,HNRNPK,HSPA8,SFPQ,SRSF3,SRSF5,SRSF7,SYF2,PABPC1,SF1,CELF1,LUC7L2,FUS,DHX9,THRAP3,NPM1,UBL5,PSIP1,CELF3,UHMK1
		GO: Biological Process	GO:0001678	cellular glucose homeostasis		0.009822	1	0.06964	0.6435	13	158	RAB11B,HNRNPK,MAP4K4,VSNL1,PPP2CA,ARRB1,PRKACA,SRI,PTPRN2,KIF5B,GPLD1,RAP1A,OXCT1
		GO: Biological Process	GO:0046847	filopodium assembly		0.009878	1	0.06978	0.6448	7	61	TTYH1,EZR,PPP1R16B,GAP43,MYO10,CDC42,SPATA13
		GO: Biological Process	GO:0032768	regulation of monooxygenase activity		0.009878	1	0.06978	0.6448	7	61	AKT1,HSP90AA1,SNCA,NOS1AP,KRAS,CALM1,CALM2
		GO: Biological Process	GO:2001244	positive regulation of intrinsic apoptotic signaling pathway		0.009878	1	0.06978	0.6448	7	61	RPS3,SPOP,SFPQ,EI24,SERINC3,DNM1L,BCAP31
		GO: Biological Process	GO:1904376	negative regulation of protein localization to cell periphery		0.009935	1	0.06978	0.6448	4	22	AP2M1,CLTC,TMEM59,PID1
		GO: Biological Process	GO:0097435	supramolecular fiber organization		0.009935	1	0.06978	0.6448	4	22	FKBP1A,HSPA8,APP,SNCA
		GO: Biological Process	GO:1903077	negative regulation of protein localization to plasma membrane		0.009935	1	0.06978	0.6448	4	22	AP2M1,CLTC,TMEM59,PID1
		GO: Biological Process	GO:0046326	positive regulation of glucose import		0.009962	1	0.06978	0.6448	6	47	AKT1,SORBS1,SLC1A2,PRKCZ,ARPP19,RAP1A
		GO: Biological Process	GO:0098900	regulation of action potential		0.009962	1	0.06978	0.6448	6	47	ANK2,ANK3,ATP2A2,NOS1AP,TAC1,RAPGEF4
		GO: Biological Process	GO:0060038	cardiac muscle cell proliferation		0.009962	1	0.06978	0.6448	6	47	MEF2C,FGFR1,PRKAR1A,CTNNB1,NDRG4,NCAM1
		GO: Biological Process	GO:0042596	fear response		0.009962	1	0.06978	0.6448	6	47	PENK,MEF2C,VDAC3,DBI,KALRN,MAPK8IP2
		GO: Biological Process	GO:0090559	regulation of membrane permeability		0.009982	1	0.06984	0.6454	8	76	HSPA8,ATF2,YWHAE,YWHAZ,DYNLL2,DYNLL1,NMT1,CAMK2A
		GO: Cellular Component	GO:0045202	synapse		1.433e-38	1.05e-35	1.05e-35	7.535e-35	125	870	GPHN,RAB11B,PDE4B,MAP1A,MAP2,MAP4,MAPT,PENK,PFN2,NRN1,SYNPR,MEF2C,HNRNPK,ADD1,AP2M1,CADM1,GRK2,UBE2I,FRRS1L,LRRTM4,CLTC,AKT1,SPARCL1,STX7,CX3CL1,HSPA8,MOB4,CAP2,VDAC3,SORBS2,ANK2,ANK3,SCAMP1,ATCAY,APC,BCAS1,APP,SLC1A2,SLC40A1,YWHAZ,RPH3A,CYFIP2,ARF1,PPP1CC,CASK,PPP2CA,NPTN,RAB3GAP1,ARRB1,RGS20,NSMF,NSG1,VPS35,PRKACA,PRKAR1A,DNAJC5,FUS,CTNNB1,ATP1A1,ATP1A2,SNCA,BRSK1,RIMS2,FYN,ATP2A2,ATP2B1,ATP2B2…
		GO: Cellular Component	GO:0044456	synapse part		1.353e-35	9.918e-33	4.959e-33	3.558e-32	108	708	GPHN,RAB11B,PDE4B,MAP1A,MAP2,MAP4,MAPT,PFN2,SYNPR,MEF2C,HNRNPK,ADD1,AP2M1,CADM1,GRK2,LRRTM4,CLTC,AKT1,STX7,CX3CL1,HSPA8,MOB4,CAP2,VDAC3,SORBS2,ANK2,ANK3,SCAMP1,BCAS1,APP,SLC1A2,SLC40A1,YWHAZ,RPH3A,ARF1,PPP1CC,CASK,PPP2CA,NPTN,RAB3GAP1,ARRB1,RGS20,NSMF,NSG1,VPS35,DNAJC5,FUS,ATP1A1,ATP1A2,SNCA,BRSK1,RIMS2,FYN,ATP2B1,GABRA1,GABRB3,GABRG2,GAD1,ARHGAP32,CLSTN3,MYH10,ATP6V1G2,SNPH,MYO5A,GAP43,SPTBN1,SR…
		GO: Cellular Component	GO:0043209	myelin sheath		1.946e-28	1.427e-25	4.756e-26	3.412e-25	52	202	ACO2,MBP,ACTG1,TUBA1B,CLTC,ATP5PD,HSPA8,MOBP,SDHA,VCP,HSP90AA1,EZR,COX6A1,CCT2,SIRT2,CCT5,NAPB,PRKCZ,ATP1A1,ATP1A2,ATP5F1A,ATP5F1B,SPTAN1,NCAM1,SUCLA2,GDI2,NDUFV2,ITPR2,SEPT8,TUBA1A,PLCB1,SYN1,SYN2,DLD,DLG1,DLST,DNM1,GNB2,GOT2,RAP1A,NSF,RTN4,TPPP,LDHB,PDIA3,EEF1A1,EEF1A2,GSTM5,THY1,PEBP1,CDC42,ENO1
		GO: Cellular Component	GO:0098794	postsynapse		9.868e-24	7.233e-21	1.808e-21	1.297e-20	70	449	GPHN,PDE4B,MAP1A,MAP2,MAP4,MAPT,MEF2C,HNRNPK,ADD1,GRK2,LRRTM4,AKT1,CX3CL1,HSPA8,MOB4,CAP2,SORBS2,ANK2,ANK3,BCAS1,APP,SLC1A2,YWHAZ,ARF1,PPP1CC,PPP2CA,NPTN,RAB3GAP1,ARRB1,RGS20,NSMF,NSG1,VPS35,FUS,ATP1A1,ATP1A2,SNCA,FYN,GABRA1,GABRB3,GABRG2,ARHGAP32,CLSTN3,MYH10,GAP43,SPTBN1,SRI,BMPR2,SNAP91,PTPRZ1,GLRB,SYN1,SYN2,DLG1,DLG4,NRGN,KALRN,NSF,CAMK2A,CAMK2B,SYNE1,NTRK2,PCLO,RTN4,RAPGEF4,PSD3,GRIA3,NCS1,D…
		GO: Cellular Component	GO:0036477	somatodendritic compartment		1.43e-22	1.048e-19	2.096e-20	1.504e-19	99	867	GPHN,PDE4B,PDE1B,MAP2,MAPT,RPS3,RPS6,MBP,PENK,ELOVL5,HNRNPK,ADD1,SLC12A5,SORT1,CADM1,GRK2,UBE2I,NEGR1,PPP1R1B,PREX1,HSPA8,MOB4,HSP90AA1,VIP,SORBS2,ANK3,GLRX3,ATCAY,APC,APP,CPNE5,SLC1A2,PABPC1,PPP1CC,CASK,NPTN,SIRT2,ARRB1,NSMF,CSNK1E,PRKCZ,FUS,CTNNB1,ATP1A2,ATP2B1,ATP2B2,ARHGAP32,MYH10,SNPH,MYO5A,MYO6,MYO10,SRI,CPLX1,DDN,NCAM1,NCDN,BMPR1A,NELL2,BMPR2,PTPRZ1,GLRB,SYN1,KCNAB1,SGCE,DLG4,TAC1,MAP1LC3B…
		GO: Cellular Component	GO:0030424	axon		3.451e-22	2.53e-19	4.217e-20	3.025e-19	77	567	TTYH1,MAPT,MBP,PENK,BACE1,PFN2,HNRNPK,MTPN,AP2M1,CADM1,GRK2,CLTC,STX7,ALDOC,FKBP1A,HSPA8,ANK3,SCAMP1,ATCAY,APC,APP,SLC1A2,YWHAE,PPP2CA,SIRT2,DNAJC5,PRKCZ,SNCA,RAB21,GABRB3,GABRG2,GAD1,MYH10,MYO5A,GAP43,MYO6,SPTAN1,SPTBN1,KIF1B,SRI,CPLX1,NCAM1,NCDN,NRP2,ITPR2,SNAP91,PTPRN2,SV2B,PTPRZ1,VAMP1,SYN1,SYN2,KCNAB1,SYT1,PYGB,DLG1,DLG4,TAC1,KIF5B,MAP1LC3B,DNM1,GOT1,NRGN,CAMK2A,NTRK2,PCLO,RAPGEF4,STMN2,GRIA…
		GO: Cellular Component	GO:0030055	cell-substrate junction		1.656e-21	1.214e-18	1.734e-19	1.244e-18	63	403	RPL30,HSP90B1,RPS3,CFL1,RPS5,RPS15,ACTG1,RPS17,RPS19,HNRNPK,ADD1,RPL23,PI4KA,CLTC,HSPA8,SDC4,SDCBP,EZR,EVL,SORBS2,HACD3,SORBS1,PABPC1,YWHAE,YWHAZ,ARF1,PPP1CC,CASK,CSRP1,PARVA,CTNNB1,RAB21,ARHGAP26,GDI2,ERBIN,MPRIP,GNB2,RAC1,KRAS,NPM1,CALR,COP1,CAV2,PIP5K1C,PDIA3,THY1,G3BP1,LRP1,RPL13A,FLOT1,CDC42,RPL3,RPL4,RPL5,RPL6,RPL7A,EPB41L2,RPL9,RPL12,ATP6V0A2,CHP1,RPL18,RPL19
		GO: Cellular Component	GO:0005925	focal adhesion		2.164e-21	1.586e-18	1.982e-19	1.422e-18	62	393	RPL30,HSP90B1,RPS3,CFL1,RPS5,RPS15,ACTG1,RPS17,RPS19,HNRNPK,ADD1,RPL23,PI4KA,CLTC,HSPA8,SDC4,SDCBP,EZR,EVL,SORBS2,HACD3,SORBS1,PABPC1,YWHAE,YWHAZ,ARF1,PPP1CC,CASK,CSRP1,PARVA,CTNNB1,RAB21,ARHGAP26,GDI2,MPRIP,GNB2,RAC1,KRAS,NPM1,CALR,COP1,CAV2,PIP5K1C,PDIA3,THY1,G3BP1,LRP1,RPL13A,FLOT1,CDC42,RPL3,RPL4,RPL5,RPL6,RPL7A,EPB41L2,RPL9,RPL12,ATP6V0A2,CHP1,RPL18,RPL19
		GO: Cellular Component	GO:0005924	cell-substrate adherens junction		4.231e-21	3.102e-18	3.446e-19	2.473e-18	62	398	RPL30,HSP90B1,RPS3,CFL1,RPS5,RPS15,ACTG1,RPS17,RPS19,HNRNPK,ADD1,RPL23,PI4KA,CLTC,HSPA8,SDC4,SDCBP,EZR,EVL,SORBS2,HACD3,SORBS1,PABPC1,YWHAE,YWHAZ,ARF1,PPP1CC,CASK,CSRP1,PARVA,CTNNB1,RAB21,ARHGAP26,GDI2,MPRIP,GNB2,RAC1,KRAS,NPM1,CALR,COP1,CAV2,PIP5K1C,PDIA3,THY1,G3BP1,LRP1,RPL13A,FLOT1,CDC42,RPL3,RPL4,RPL5,RPL6,RPL7A,EPB41L2,RPL9,RPL12,ATP6V0A2,CHP1,RPL18,RPL19
		GO: Cellular Component	GO:0005912	adherens junction		7.328e-20	5.371e-17	5.371e-18	3.854e-17	67	484	RPL30,HSP90B1,RPS3,CFL1,RPS5,RPS15,ACTG1,RPS17,RPS19,HNRNPK,ADD1,RPL23,CADM1,PI4KA,CLTC,HSPA8,SDC4,SDCBP,EZR,EVL,SORBS2,HACD3,APC,SORBS1,PABPC1,YWHAE,YWHAZ,ARF1,PPP1CC,CASK,CSRP1,SSX2IP,PARVA,CTNNB1,RAB21,ARHGAP26,SPTAN1,GDI2,MPRIP,DLG1,GNB2,RAC1,KRAS,NPM1,CALR,COP1,CAV2,PIP5K1C,PDIA3,THY1,G3BP1,LRP1,RPL13A,FLOT1,CDC42,RPL3,RPL4,RPL5,RPL6,RPL7A,EPB41L2,RPL9,RPL12,ATP6V0A2,CHP1,RPL18,RPL19
		GO: Cellular Component	GO:0070161	anchoring junction		1.409e-19	1.033e-16	9.386e-18	6.735e-17	68	503	RPL30,HSP90B1,RPS3,CFL1,RPS5,RPS15,ACTG1,RPS17,RPS19,HNRNPK,ADD1,RPL23,CADM1,PI4KA,CLTC,HSPA8,SDC4,SDCBP,EZR,EVL,SORBS2,HACD3,APC,SORBS1,PABPC1,YWHAE,YWHAZ,ARF1,PPP1CC,CASK,CSRP1,SSX2IP,PARVA,CTNNB1,RAB21,ARHGAP26,SPTAN1,GDI2,MPRIP,DLG1,KAZN,GNB2,RAC1,KRAS,NPM1,CALR,COP1,CAV2,PIP5K1C,PDIA3,THY1,G3BP1,LRP1,RPL13A,FLOT1,CDC42,RPL3,RPL4,RPL5,RPL6,RPL7A,EPB41L2,RPL9,RPL12,ATP6V0A2,CHP1,RPL18,RPL19
		GO: Cellular Component	GO:0060076	excitatory synapse		1.027e-18	7.529e-16	6.274e-17	4.502e-16	46	252	PDE4B,MAP1A,MAP2,MAP4,MAPT,HNRNPK,ADD1,HSPA8,CAP2,SORBS2,BCAS1,YWHAZ,ARF1,PPP2CA,NPTN,ARRB1,RGS20,NSMF,VPS35,ATP1A1,FYN,ARHGAP32,CLSTN3,GAP43,SPTBN1,BMPR2,SNAP91,SYN1,SYN2,SYT1,DLG1,DLG4,NRGN,KALRN,NSF,CAMK2A,CAMK2B,NTRK2,PCLO,RTN4,RAPGEF4,PSD3,GRIA3,NCS1,DCLK1,MAPK8IP2
		GO: Cellular Component	GO:0033267	axon part		1.204e-18	8.824e-16	6.293e-17	4.515e-16	51	309	MAPT,MBP,PENK,PFN2,HNRNPK,AP2M1,CADM1,CLTC,STX7,FKBP1A,HSPA8,ANK3,SCAMP1,APC,APP,SLC1A2,PPP2CA,SIRT2,DNAJC5,PRKCZ,SNCA,RAB21,GABRB3,GAD1,SPTAN1,SPTBN1,KIF1B,SRI,CPLX1,SNAP91,PTPRN2,SV2B,VAMP1,SYN1,SYN2,KCNAB1,SYT1,DLG1,DLG4,KIF5B,DNM1,GOT1,NTRK2,PCLO,RAPGEF4,GRIA3,VTI1A,KIF3A,PEBP1,SYNGR1,STX6
		GO: Cellular Component	GO:0099572	postsynaptic specialization		1.288e-18	9.44e-16	6.293e-17	4.515e-16	44	232	PDE4B,MAP1A,MAP2,MAP4,MAPT,HNRNPK,ADD1,HSPA8,CAP2,SORBS2,BCAS1,YWHAZ,ARF1,PPP2CA,NPTN,ARRB1,RGS20,NSMF,VPS35,ATP1A1,FYN,ARHGAP32,CLSTN3,GAP43,SPTBN1,BMPR2,SNAP91,SYN1,SYN2,DLG1,DLG4,NRGN,KALRN,NSF,CAMK2A,CAMK2B,NTRK2,PCLO,RTN4,PSD3,GRIA3,NCS1,DCLK1,MAPK8IP2
		GO: Cellular Component	GO:0014069	postsynaptic density		1.288e-18	9.44e-16	6.293e-17	4.515e-16	44	232	PDE4B,MAP1A,MAP2,MAP4,MAPT,HNRNPK,ADD1,HSPA8,CAP2,SORBS2,BCAS1,YWHAZ,ARF1,PPP2CA,NPTN,ARRB1,RGS20,NSMF,VPS35,ATP1A1,FYN,ARHGAP32,CLSTN3,GAP43,SPTBN1,BMPR2,SNAP91,SYN1,SYN2,DLG1,DLG4,NRGN,KALRN,NSF,CAMK2A,CAMK2B,NTRK2,PCLO,RTN4,PSD3,GRIA3,NCS1,DCLK1,MAPK8IP2
		GO: Cellular Component	GO:0030425	dendrite		3.735e-18	2.738e-15	1.711e-16	1.228e-15	72	590	GPHN,PDE4B,MAP2,MAPT,RPS3,RPS6,PENK,ELOVL5,HNRNPK,ADD1,SLC12A5,SORT1,CADM1,GRK2,UBE2I,NEGR1,PREX1,HSPA8,MOB4,SORBS2,ANK3,GLRX3,ATCAY,APC,APP,SLC1A2,PABPC1,PPP1CC,CASK,NPTN,ARRB1,NSMF,FUS,CTNNB1,ATP1A2,ATP2B2,ARHGAP32,MYH10,SRI,CPLX1,DDN,NCDN,BMPR1A,NELL2,BMPR2,PTPRZ1,GLRB,SYN1,KCNAB1,SGCE,DLG4,MAP1LC3B,CACNA1A,NRGN,NSF,CAMK2A,CAMK2B,SYNE1,NTRK2,PCLO,RAPGEF4,PUM2,GRIA3,LAMP1,NCS1,TTLL7,CCNG1,THY1,…
		GO: Cellular Component	GO:0098793	presynapse		1.859e-17	1.363e-14	8.015e-16	5.751e-15	52	341	RAB11B,PDE4B,PFN2,SYNPR,AP2M1,CADM1,CLTC,STX7,HSPA8,VDAC3,SCAMP1,APP,SLC1A2,SLC40A1,RPH3A,CASK,PPP2CA,NPTN,DNAJC5,SNCA,BRSK1,RIMS2,GABRB3,GAD1,ATP6V1G2,SNPH,MYO5A,CPLX1,DBI,SNAP91,PTPRN2,SV2B,VAMP1,SYN1,SYN2,SYT1,DLG1,DLG4,DNM1,CACNA1A,CAMK2A,NTRK2,PCLO,DNM1L,GRIA3,LAMP1,VTI1A,PIP5K1C,PEBP1,SYNGR1,UNC13C,STX6
		GO: Cellular Component	GO:0048471	perinuclear region of cytoplasm		1.917e-16	1.405e-13	7.806e-15	5.601e-14	78	724	HSP90B1,PDE4B,RPS6,GABARAP,TSNAX,ZFYVE1,MEIS2,ADD1,MTPN,SORT1,FGFR1,NOCT,STX7,DNAJA1,CX3CL1,PREX1,HSPA8,MOBP,MOB4,VCP,HSP90AA1,EZR,VLDLR,SORBS2,APP,RAB14,YWHAZ,CYFIP2,ARF1,SIRT2,PRKACA,PPP1R16B,CLINT1,PRKCZ,FUS,CTNNB1,SNCA,ATP2A2,NOS1AP,MYO6,VPS4A,RAP1GAP2,DBI,PTN,MLC1,SERINC3,DLG1,ITM2C,KIF5B,GNB2,TLK2,RAP1A,KALRN,CALR,SYNE1,PCLO,DNAJB6,HIP1R,STMN2,TPPP,AGGF1,PUM2,DNM1L,LAMP1,VTI1A,SPAG9,CAV2,AT…
		GO: Cellular Component	GO:0022626	cytosolic ribosome		1.024e-15	7.508e-13	3.952e-14	2.835e-13	29	119	RPL30,RPL27A,RPL35A,RPL36A,RPS3,RPS5,RPS6,RPS15,RPS15A,RPS17,RPS19,RPS21,RPS23,RPS24,RPL23,RPL7L1,RPL13A,RPL3,RPL4,RPL5,RPL6,RPL7A,RPL9,RPL11,RPL12,RPL13,RPL17,RPL18,RPL19
		GO: Cellular Component	GO:0044297	cell body		1.666e-15	1.221e-12	6.106e-14	4.381e-13	74	691	GPHN,PDE1B,MAP2,MAPT,RPS6,MBP,PENK,ELOVL5,GABARAP,SLC12A5,SORT1,NEGR1,PPP1R1B,HSPA8,MOB4,HSP90AA1,EZR,VIP,SORBS2,APC,CCT2,CPNE5,SIRT2,NSMF,CCT5,CSNK1E,PRKCZ,FUS,ATP2B1,ATP2B2,MYH10,SNPH,MYO5A,MYO6,MYO10,CPLX1,DDN,NCAM1,NCDN,BMPR1A,NELL2,BMPR2,PTPRZ1,KCNAB1,TAC1,MAP1LC3B,GNB2,GOT2,CACNA1A,NRGN,KALRN,CAMK2A,CAMK2B,NTRK2,PCLO,RTN4,RAPGEF4,STMN2,PUM2,GRIA3,LAMP1,VTI1A,CIT,KIF3A,TTLL7,EEF1A2,CCNG1,PEB…
		GO: Cellular Component	GO:0044306	neuron projection terminus		4.895e-14	3.588e-11	1.709e-12	1.226e-11	35	199	PENK,PFN2,HNRNPK,AP2M1,CLTC,STX7,FKBP1A,HSPA8,SCAMP1,APC,APP,PPP2CA,DNAJC5,SNCA,GABRB3,GAD1,SRI,CPLX1,SNAP91,PTPRN2,SV2B,VAMP1,SYN1,SYN2,SYT1,DLG4,GOT1,NTRK2,PCLO,RAPGEF4,GRIA3,VTI1A,PEBP1,SYNGR1,STX6
		GO: Cellular Component	GO:0043025	neuronal cell body		6.087e-14	4.462e-11	2.028e-12	1.455e-11	66	616	GPHN,PDE1B,MAP2,MBP,PENK,ELOVL5,SLC12A5,SORT1,NEGR1,PPP1R1B,HSPA8,MOB4,HSP90AA1,VIP,SORBS2,APC,CPNE5,SIRT2,NSMF,CSNK1E,PRKCZ,FUS,ATP2B1,ATP2B2,MYH10,SNPH,MYO5A,MYO6,MYO10,CPLX1,DDN,NCAM1,NCDN,BMPR1A,NELL2,BMPR2,PTPRZ1,KCNAB1,TAC1,MAP1LC3B,GOT2,CACNA1A,NRGN,KALRN,CAMK2A,CAMK2B,NTRK2,PCLO,RTN4,RAPGEF4,STMN2,PUM2,GRIA3,LAMP1,VTI1A,CIT,KIF3A,TTLL7,EEF1A2,CCNG1,PEBP1,EIF5A,SLC4A10,LRP1,CDC42,MAPK8IP2
		GO: Cellular Component	GO:0043679	axon terminus		2.018e-13	1.479e-10	6.432e-12	4.615e-11	33	186	PENK,PFN2,HNRNPK,AP2M1,CLTC,STX7,FKBP1A,HSPA8,SCAMP1,APP,PPP2CA,DNAJC5,SNCA,GABRB3,GAD1,SRI,CPLX1,SNAP91,PTPRN2,SV2B,VAMP1,SYN1,SYN2,SYT1,GOT1,NTRK2,PCLO,RAPGEF4,GRIA3,VTI1A,PEBP1,SYNGR1,STX6
		GO: Cellular Component	GO:0044437	vacuolar part		3.005e-13	2.203e-10	9.178e-12	6.585e-11	70	700	ZDHHC2,RAB11B,ACP2,BACE1,GABARAP,SLC22A17,SORT1,AP2M1,ATP6V1D,CLTC,STX7,HSPA8,SDC4,HSP90AA1,PCYOX1,SCAMP1,CHMP5,TMEM59,APP,IDS,RAB14,ATP6V1H,ARRB1,NSG2,NAPB,ATP6V0E2,VPS35,DNAJC5,WDFY3,RAB21,CTSL,SNX2,GAA,SNX5,LGMN,ARHGAP32,ATP6V1C1,ATP6V1E1,ATP6V0B,ATP6V1G2,ATP6AP1,PSAP,MYO6,VPS4A,MAP1LC3A,PIP4P1,VAMP1,SLC9A7,DLD,ITM2C,MAP1LC3B,GNB2,RAC1,RAB12,PLEKHB2,VMP1,GPLD1,NSF,NTRK2,LAMP1,VTI1A,ATP9A,ECE1,…
		GO: Cellular Component	GO:0005774	vacuolar membrane		3.438e-13	2.52e-10	1.008e-11	7.233e-11	63	593	ZDHHC2,RAB11B,ACP2,BACE1,GABARAP,SLC22A17,SORT1,AP2M1,ATP6V1D,CLTC,STX7,HSPA8,PCYOX1,SCAMP1,CHMP5,TMEM59,RAB14,ATP6V1H,ARRB1,NSG2,NAPB,ATP6V0E2,VPS35,DNAJC5,WDFY3,RAB21,SNX2,GAA,SNX5,ARHGAP32,ATP6V1C1,ATP6V1E1,ATP6V0B,ATP6V1G2,ATP6AP1,PSAP,MYO6,VPS4A,MAP1LC3A,PIP4P1,VAMP1,SLC9A7,ITM2C,MAP1LC3B,GNB2,RAC1,RAB12,PLEKHB2,VMP1,GPLD1,NSF,NTRK2,LAMP1,VTI1A,ATP9A,ECE1,EEF1A1,EEF1A2,ABCA5,LRP1,FLOT1,ACAP2…
		GO: Cellular Component	GO:0043195	terminal bouton		8.352e-13	6.122e-10	2.355e-11	1.689e-10	25	112	PFN2,AP2M1,CLTC,STX7,HSPA8,SCAMP1,APP,PPP2CA,DNAJC5,SNCA,GABRB3,CPLX1,SNAP91,PTPRN2,SV2B,VAMP1,SYN1,SYN2,SYT1,NTRK2,PCLO,GRIA3,VTI1A,SYNGR1,STX6
		GO: Cellular Component	GO:0008021	synaptic vesicle		1.742e-12	1.277e-09	4.729e-11	3.393e-10	29	156	RAB11B,PDE4B,SYNPR,CADM1,HSPA8,VDAC3,SCAMP1,SLC40A1,RPH3A,DNAJC5,SNCA,BRSK1,ATP6V1G2,MYO5A,DBI,SNAP91,PTPRN2,SV2B,VAMP1,SYN1,SYN2,SYT1,DLG4,DNM1,DNM1L,LAMP1,VTI1A,PEBP1,SYNGR1
		GO: Cellular Component	GO:0070382	exocytic vesicle		3.985e-12	2.921e-09	1.043e-10	7.485e-10	30	172	RAB11B,PDE4B,SYNPR,CADM1,HSPA8,VDAC3,SCAMP1,SLC40A1,RPH3A,DNAJC5,SNCA,BRSK1,ATP6V1G2,MYO5A,DBI,SNAP91,PTPRN2,SV2B,VAMP1,SYN1,SYN2,SYT1,DLG4,DNM1,RAB6A,DNM1L,LAMP1,VTI1A,PEBP1,SYNGR1
		GO: Cellular Component	GO:0022625	cytosolic large ribosomal subunit		4.955e-12	3.632e-09	1.252e-10	8.986e-10	19	67	RPL30,RPL27A,RPL35A,RPL36A,RPL23,RPL7L1,RPL13A,RPL3,RPL4,RPL5,RPL6,RPL7A,RPL9,RPL11,RPL12,RPL13,RPL17,RPL18,RPL19
		GO: Cellular Component	GO:0044391	ribosomal subunit		6.298e-12	4.616e-09	1.539e-10	1.104e-09	30	175	RPL30,RPL27A,RPL35A,RPL36A,RPS3,RPS5,RPS6,RPS15,RPS15A,RPS17,RPS19,RPS21,RPS23,RPS24,RPL23,RPL7L1,NPM1,RPL13A,RPL3,RPL4,RPL5,RPL6,RPL7A,RPL9,RPL11,RPL12,RPL13,RPL17,RPL18,RPL19
		GO: Cellular Component	GO:0005840	ribosome		7.357e-12	5.393e-09	1.74e-10	1.248e-09	35	235	RPL30,RPL27A,RPL35A,ABCF1,RPL36A,RPS3,RPS5,RPS6,MRPL30,RPS15,RPS15A,RPS17,RPS19,RPS21,RPS23,RPS24,RPL23,RPL7L1,SF1,MRPL48,SNCA,NPM1,RPL13A,RPL3,RPL4,RPL5,RPL6,RPL7A,RPL9,RPL11,RPL12,RPL13,RPL17,RPL18,RPL19
		GO: Cellular Component	GO:0044445	cytosolic part		1.455e-10	1.067e-07	3.333e-09	2.391e-08	33	235	RPL30,RPL27A,RPL35A,RPL36A,RPS3,RPS5,RPS6,RPS15,RPS15A,RPS17,RPS19,RPS21,RPS23,RPS24,RPL23,RPL7L1,CCT2,CCT5,PSMC6,RPL13A,ENO1,RPL3,RPL4,RPL5,RPL6,RPL7A,RPL9,RPL11,RPL12,RPL13,RPL17,RPL18,RPL19
		GO: Cellular Component	GO:0031252	cell leading edge		1.929e-10	1.414e-07	4.285e-09	3.074e-08	44	389	KLHL2,RPS3,CFL1,CYTH2,SLC12A5,HSP90AA1,EZR,EVL,SORBS2,APC,GAS7,APP,SLC1A2,YWHAZ,ARF1,SSX2IP,PARVA,PRKCZ,CTNNB1,ATP2B1,SNX2,SNX5,GABRG2,MYH10,PSD,MYO5A,MYO6,MYO10,SPTBN1,DDN,JMY,PTPRZ1,SGCE,TESC,RAC1,STMN2,PIP5K1C,CIT,EEF1A1,PLEKHA1,FLOT1,CDC42,ACAP2,SPATA13
		GO: Cellular Component	GO:0099503	secretory vesicle		3.72e-10	2.727e-07	8.021e-09	5.755e-08	53	535	RAB11B,ABCA3,PDE4B,CHGB,SYNPR,AP2M1,CADM1,ATP8A1,STX7,HSPA8,VDAC3,SCG5,SCAMP1,APLP2,APP,RAB14,SLC40A1,RPH3A,DNAJC5,SNCA,BRSK1,ATP6V1G2,MYO5A,SRI,DBI,SNAP91,PTPRN2,SV2B,VAMP1,VPS13A,SYN1,SYN2,SYT1,DLD,DLG4,PCSK1N,DNM1,RAB6A,RAB12,CALR,DNM1L,LAMP1,VTI1A,SPAG9,CAV2,ECE1,PDIA3,NCS1,PEBP1,SYNGR1,TMSB4X,CDC42,ATP6V0A2
		GO: Cellular Component	GO:0030133	transport vesicle		6.277e-10	4.601e-07	1.315e-08	9.432e-08	42	374	RAB11B,PDE4B,SYNPR,SORT1,CADM1,CLTC,HSPA8,VDAC3,SCAMP1,APP,RAB14,SLC40A1,RPH3A,DNAJC5,TMED9,SNCA,BRSK1,VAMP4,ATP6V1G2,MYO5A,DBI,YIPF5,SNAP91,PTPRN2,SV2B,VAMP1,SYN1,SYN2,SYT1,DLG4,DNM1,RAB6A,NRGN,PCLO,DNM1L,LAMP1,VTI1A,CAV2,PEBP1,SAR1B,SYNGR1,CHP1
		GO: Cellular Component	GO:0015934	large ribosomal subunit		3.164e-09	2.319e-06	6.441e-08	4.622e-07	20	105	RPL30,RPL27A,RPL35A,RPL36A,RPL23,RPL7L1,NPM1,RPL13A,RPL3,RPL4,RPL5,RPL6,RPL7A,RPL9,RPL11,RPL12,RPL13,RPL17,RPL18,RPL19
		GO: Cellular Component	GO:0044433	cytoplasmic vesicle part		3.372e-09	2.472e-06	6.658e-08	4.777e-07	56	619	RAB11B,HSP90B1,ABCA3,BACE1,SYNPR,AP2M1,ATP8A1,PI4KA,CLTC,HSPA8,HSP90AA1,SCAMP1,APLP2,APP,RAB14,YWHAE,YWHAZ,RPH3A,ARRB1,NSG2,ATP6V0E2,DNAJC5,SNCA,RAB21,SNX5,GAD1,ATP6V0B,ATP6V1G2,MYO6,KIF1B,HSPH1,SRI,SNAP91,PTPRN2,SV2B,VAMP1,SYN1,SYN2,SYT1,DLD,DLG4,NRGN,CALR,CAMK2A,CAMK2B,HIP1R,DNM1L,GRIA3,LAMP1,VTI1A,CAV2,SAR1B,SYNGR1,LRP1,TMSB4X,ATP6V0A2
		GO: Cellular Component	GO:0005768	endosome		3.452e-09	2.53e-06	6.658e-08	4.777e-07	68	826	ZDHHC2,TPT1,RAB11B,BACE1,HMGB1,SORT1,AP2M1,KIDINS220,CLTC,STX7,HSPA8,EZR,SCAMP1,CHMP5,TMEM59,APP,RAB14,SLC40A1,ARF1,TRAK1,NSG2,ATP6V0E2,NSG1,VPS35,PRKCZ,TRAK2,ATP1A1,ATP1A2,VAMP4,RAB21,FYN,CTSL,SNX2,SNX5,LGMN,ARHGAP32,ATP6V1E1,GAPVD1,ATP6V0B,ATP6AP1,MYO5A,VPS4A,MAP1LC3A,OCIAD1,TUBA1A,MLC1,PIP4P1,SLC9A7,NIPA1,RAC1,RAB12,PLEKHB2,RAP1A,NTRK2,STMN2,GRB2,LAMP1,VTI1A,ATP9A,ECE1,ABCA5,RABEP1,NISCH,LRP1,…
		GO: Cellular Component	GO:0012506	vesicle membrane		8.37e-09	6.135e-06	1.573e-07	1.129e-06	50	535	RAB11B,ABCA3,BACE1,SYNPR,AP2M1,ATP8A1,PI4KA,CLTC,HSPA8,SCAMP1,APLP2,RAB14,YWHAE,YWHAZ,RPH3A,ARRB1,NSG2,ATP6V0E2,DNAJC5,SNCA,RAB21,ATP2A2,SNX5,GAD1,ATP6V0B,MYO6,KIF1B,SRI,SNAP91,PTPRN2,SV2B,VAMP1,SYN1,SYN2,SYT1,DLG4,NRGN,CAMK2A,CAMK2B,HIP1R,GRB2,DNM1L,GRIA3,LAMP1,VTI1A,CAV2,SAR1B,SYNGR1,LRP1,ATP6V0A2
		GO: Cellular Component	GO:0005765	lysosomal membrane		1.028e-08	7.536e-06	1.821e-07	1.307e-06	33	277	ACP2,SORT1,AP2M1,ATP6V1D,CLTC,STX7,HSPA8,TMEM59,RAB14,ATP6V1H,ARRB1,VPS35,DNAJC5,GAA,ATP6V1C1,ATP6V1E1,PSAP,MYO6,PIP4P1,VAMP1,ITM2C,GNB2,RAB12,GPLD1,NSF,LAMP1,ECE1,EEF1A1,EEF1A2,ABCA5,LRP1,FLOT1,ATP6V0A2
		GO: Cellular Component	GO:0098852	lytic vacuole membrane		1.028e-08	7.536e-06	1.821e-07	1.307e-06	33	277	ACP2,SORT1,AP2M1,ATP6V1D,CLTC,STX7,HSPA8,TMEM59,RAB14,ATP6V1H,ARRB1,VPS35,DNAJC5,GAA,ATP6V1C1,ATP6V1E1,PSAP,MYO6,PIP4P1,VAMP1,ITM2C,GNB2,RAB12,GPLD1,NSF,LAMP1,ECE1,EEF1A1,EEF1A2,ABCA5,LRP1,FLOT1,ATP6V0A2
		GO: Cellular Component	GO:0005764	lysosome		1.068e-08	7.83e-06	1.821e-07	1.307e-06	50	539	ACP2,GABARAP,SORT1,AP2M1,ATP6V1D,CLTC,STX7,HSPA8,SDC4,HSP90AA1,PCYOX1,ANK3,TMEM59,NPC2,IDS,RAB14,YWHAZ,PRDX6,ATP6V1H,ARRB1,VPS35,DNAJC5,SNCA,VAMP4,CTSL,GAA,LGMN,ATP6V1C1,ATP6V1E1,PSAP,MYO5A,MYO6,VPS4A,MLC1,PIP4P1,VAMP1,ITM2C,GNB2,GOT1,RAB12,GPLD1,NSF,LAMP1,ECE1,EEF1A1,EEF1A2,ABCA5,LRP1,FLOT1,ATP6V0A2
		GO: Cellular Component	GO:0000323	lytic vacuole		1.068e-08	7.83e-06	1.821e-07	1.307e-06	50	539	ACP2,GABARAP,SORT1,AP2M1,ATP6V1D,CLTC,STX7,HSPA8,SDC4,HSP90AA1,PCYOX1,ANK3,TMEM59,NPC2,IDS,RAB14,YWHAZ,PRDX6,ATP6V1H,ARRB1,VPS35,DNAJC5,SNCA,VAMP4,CTSL,GAA,LGMN,ATP6V1C1,ATP6V1E1,PSAP,MYO5A,MYO6,VPS4A,MLC1,PIP4P1,VAMP1,ITM2C,GNB2,GOT1,RAB12,GPLD1,NSF,LAMP1,ECE1,EEF1A1,EEF1A2,ABCA5,LRP1,FLOT1,ATP6V0A2
		GO: Cellular Component	GO:0030659	cytoplasmic vesicle membrane		1.616e-08	1.184e-05	2.692e-07	1.931e-06	48	513	RAB11B,ABCA3,BACE1,SYNPR,AP2M1,ATP8A1,PI4KA,CLTC,HSPA8,SCAMP1,APLP2,RAB14,YWHAE,YWHAZ,RPH3A,ARRB1,NSG2,ATP6V0E2,DNAJC5,SNCA,RAB21,SNX5,GAD1,ATP6V0B,MYO6,KIF1B,SRI,SNAP91,PTPRN2,SV2B,VAMP1,SYN1,SYN2,SYT1,DLG4,NRGN,CAMK2A,CAMK2B,HIP1R,DNM1L,GRIA3,LAMP1,VTI1A,CAV2,SAR1B,SYNGR1,LRP1,ATP6V0A2
		GO: Cellular Component	GO:0097060	synaptic membrane		1.841e-08	1.35e-05	2.945e-07	2.113e-06	34	298	GPHN,LRRTM4,ANK2,ANK3,SLC1A2,ARF1,CASK,NPTN,ARRB1,NSMF,NSG1,RIMS2,ATP2B1,GABRA1,GABRB3,GABRG2,ARHGAP32,CLSTN3,SNPH,DDN,SNAP91,PTPRZ1,GLRB,SYT1,DLG1,DLG4,CAMK2A,SYNE1,NTRK2,PSD3,GRIA3,NCS1,UNC13C,ENO1
		GO: Cellular Component	GO:0042470	melanosome		1.888e-08	1.384e-05	2.945e-07	2.113e-06	19	105	HSP90B1,FASN,CLTC,HSPA8,SDCBP,HSP90AA1,YWHAE,YWHAZ,DNAJC5,ATP1A1,ATP6V1G2,MYO5A,GANAB,RAC1,CALU,LAMP1,PDIA3,SYNGR1,FLOT1
		GO: Cellular Component	GO:0048770	pigment granule		1.888e-08	1.384e-05	2.945e-07	2.113e-06	19	105	HSP90B1,FASN,CLTC,HSPA8,SDCBP,HSP90AA1,YWHAE,YWHAZ,DNAJC5,ATP1A1,ATP6V1G2,MYO5A,GANAB,RAC1,CALU,LAMP1,PDIA3,SYNGR1,FLOT1
		GO: Cellular Component	GO:0016469	proton-transporting two-sector ATPase complex		2.179e-08	1.597e-05	3.328e-07	2.388e-06	13	48	ATP6V1D,ATP5PD,ATP6V1H,ATP6V0E2,ATP5F1A,ATP5F1B,ATP5PF,ATP6V1C1,ATP6V1E1,ATP6V0B,ATP6V1G2,ATP6AP1,ATP6V0A2
		GO: Cellular Component	GO:0005789	endoplasmic reticulum membrane		4.814e-08	3.529e-05	7.201e-07	5.167e-06	74	994	TTYH1,HSP90B1,MARCH6,ELOVL5,RTN3,EMC8,RTN1,FAAH,SORT1,SELENOK,MSMO1,SMIM14,SERINC1,FADS2,PITPNB,DNAJA1,SEC61A1,FKBP1A,SDCBP,VCP,SEL1L,MIA3,HACD3,SPCS1,SPTLC2,EI24,RAB3GAP1,TMED9,SARAF,RAB21,ATP2A2,NDRG4,NOS1AP,ILDR2,ARHGAP32,AHCYL1,CLSTN3,EMC7,MLEC,SRI,PTDSS1,DDN,SEC11C,SSR3,DDOST,STT3A,ITPR2,TMX1,YIPF5,DHCR7,TMEM132A,DLG1,OS9,EMC10,RAB6A,RAC1,ACSL6,CALR,CALU,CAMK2B,RTN4,VTI1A,TMBIM6,PDIA3,NOMO1,…
		GO: Cellular Component	GO:0030529	intracellular ribonucleoprotein complex		6.631e-08	4.861e-05	9.531e-07	6.838e-06	60	745	RPL30,RPL27A,RPL35A,ABCF1,RPL36A,MAPT,RPS3,RPS5,RPS6,MRPL30,RPS15,RPS15A,U2AF2,RPS17,RPS19,RPS21,RPS23,RPS24,HNRNPK,WAC,CIRBP,RPL23,RPL7L1,NOCT,HSPA8,VBP1,SYF2,PABPC1,SF1,CELF1,CSNK1E,LUC7L2,MRPL48,FUS,EIF3H,SNCA,NCL,DHX9,MSI2,TUBA1A,RAC1,NPM1,CALR,PUM2,G3BP1,UHMK1,RPL13A,CDC42,RPL3,RPL4,RPL5,RPL6,RPL7A,RPL9,RPL11,RPL12,RPL13,RPL17,RPL18,RPL19
		GO: Cellular Component	GO:1990904	ribonucleoprotein complex		6.631e-08	4.861e-05	9.531e-07	6.838e-06	60	745	RPL30,RPL27A,RPL35A,ABCF1,RPL36A,MAPT,RPS3,RPS5,RPS6,MRPL30,RPS15,RPS15A,U2AF2,RPS17,RPS19,RPS21,RPS23,RPS24,HNRNPK,WAC,CIRBP,RPL23,RPL7L1,NOCT,HSPA8,VBP1,SYF2,PABPC1,SF1,CELF1,CSNK1E,LUC7L2,MRPL48,FUS,EIF3H,SNCA,NCL,DHX9,MSI2,TUBA1A,RAC1,NPM1,CALR,PUM2,G3BP1,UHMK1,RPL13A,CDC42,RPL3,RPL4,RPL5,RPL6,RPL7A,RPL9,RPL11,RPL12,RPL13,RPL17,RPL18,RPL19
		GO: Cellular Component	GO:0005874	microtubule		8.499e-08	6.23e-05	1.198e-06	8.596e-06	41	426	MAP1A,MAP2,MAP4,MAPT,GABARAP,SKA2,TUBA1B,MID1IP1,HSPA8,NICN1,NEK7,APC,CCT2,MAPRE1,SIRT2,RGS20,CCT5,DYNLL2,DYNLL1,SNPH,MYO5A,KIF1B,HSPH1,MAP1LC3A,TUBA1A,DLG1,KIF5B,KIF5C,MAP1LC3B,DNM1,CAMSAP2,DYNC1H1,DYNC1I2,CALM1,CALM2,TPPP,DNM1L,KIF3A,TTLL7,RMDN3,DYNC1LI1
		GO: Cellular Component	GO:0043197	dendritic spine		8.752e-08	6.415e-05	1.21e-06	8.684e-06	22	151	PDE4B,HNRNPK,ADD1,GRK2,HSPA8,MOB4,APP,SLC1A2,PPP1CC,ARRB1,FUS,ATP1A2,ARHGAP32,MYH10,SRI,PTPRZ1,DLG4,NRGN,SYNE1,NTRK2,RAPGEF4,GRIA3
		GO: Cellular Component	GO:0044309	neuron spine		1.111e-07	8.144e-05	1.508e-06	1.082e-05	22	153	PDE4B,HNRNPK,ADD1,GRK2,HSPA8,MOB4,APP,SLC1A2,PPP1CC,ARRB1,FUS,ATP1A2,ARHGAP32,MYH10,SRI,PTPRZ1,DLG4,NRGN,SYNE1,NTRK2,RAPGEF4,GRIA3
		GO: Cellular Component	GO:0099568	cytoplasmic region		1.544e-07	0.0001132	2.058e-06	1.477e-05	34	325	CFL1,HNRNPK,EZR,GLRX3,APC,CRIP2,MAPRE1,RGS20,NSMF,PRKCZ,CTNNB1,SNCA,RAB21,GAD1,ARHGAP32,MYH10,MYO6,MYO10,SPTAN1,SPTBN1,KIF1B,NCL,ITPR2,ARHGEF9,KCNAB1,DLG4,CAMK2A,PCLO,CAPZA2,KIF3A,EEF1A1,UHMK1,FLOT1,EPB41L2
		GO: Cellular Component	GO:0031256	leading edge membrane		3.406e-07	0.0002497	4.459e-06	3.199e-05	21	150	RPS3,CFL1,SLC12A5,HSP90AA1,EZR,APC,SLC1A2,ATP2B1,GABRG2,MYO6,SPTBN1,DDN,PTPRZ1,SGCE,TESC,RAC1,PIP5K1C,EEF1A1,PLEKHA1,CDC42,SPATA13
		GO: Cellular Component	GO:0001726	ruffle		6.473e-07	0.0004745	8.324e-06	5.973e-05	22	169	KLHL2,RPS3,CFL1,CYTH2,HSP90AA1,EZR,APC,GAS7,SNX5,PSD,MYO5A,MYO6,MYO10,PTPRZ1,TESC,RAC1,PIP5K1C,CIT,EEF1A1,PLEKHA1,ACAP2,SPATA13
		GO: Cellular Component	GO:0030136	clathrin-coated vesicle		1.242e-06	0.0009102	1.569e-05	0.0001126	21	162	SORT1,AP2M1,CLTC,HSPA8,SCAMP1,RAB14,DNAJC5,TMED9,CLINT1,GAD1,MYO6,SNAP91,MLC1,SYT1,NRGN,HIP1R,VTI1A,ECE1,BCAP31,LRP1,STX6
		GO: Cellular Component	GO:0098798	mitochondrial protein complex		1.274e-06	0.0009338	1.583e-05	0.0001136	20	149	TIMM23,TIMM17A,ATP5PD,SDHA,COX6A1,SNCA,ATP5F1A,ATP5F1B,ATP5PF,TOMM20,NDUFA8,NDUFA9,NDUFB8,NDUFB9,NDUFS4,NDUFV2,TOMM70,AFG3L2,NDUFA13,HADHB
		GO: Cellular Component	GO:0098800	inner mitochondrial membrane protein complex		1.415e-06	0.001037	1.708e-05	0.0001226	17	112	TIMM23,TIMM17A,ATP5PD,SDHA,COX6A1,SNCA,ATP5F1A,ATP5F1B,ATP5PF,NDUFA8,NDUFA9,NDUFB8,NDUFB9,NDUFS4,NDUFV2,AFG3L2,NDUFA13
		GO: Cellular Component	GO:0033176	proton-transporting V-type ATPase complex		1.422e-06	0.001042	1.708e-05	0.0001226	8	23	ATP6V1D,ATP6V1H,ATP6V0E2,ATP6V1C1,ATP6V0B,ATP6V1G2,ATP6AP1,ATP6V0A2
		GO: Cellular Component	GO:0098857	membrane microdomain		1.567e-06	0.001149	1.824e-05	0.0001308	33	343	RFTN2,ADCY1,GRK2,HSPA8,SDC4,SDCBP,EZR,ANK2,SORBS1,APP,PRKACA,PRKAR1A,PRKCZ,CTNNB1,ATP1A1,ATP1A2,FYN,ATP2B1,ATP2B2,NOS1AP,BMPR1A,BMPR2,MLC1,DLG1,KRAS,RAP1B,CAV2,LDHB,MAL2,THY1,SPRED1,EMP2,FLOT1
		GO: Cellular Component	GO:0045121	membrane raft		1.567e-06	0.001149	1.824e-05	0.0001308	33	343	RFTN2,ADCY1,GRK2,HSPA8,SDC4,SDCBP,EZR,ANK2,SORBS1,APP,PRKACA,PRKAR1A,PRKCZ,CTNNB1,ATP1A1,ATP1A2,FYN,ATP2B1,ATP2B2,NOS1AP,BMPR1A,BMPR2,MLC1,DLG1,KRAS,RAP1B,CAV2,LDHB,MAL2,THY1,SPRED1,EMP2,FLOT1
		GO: Cellular Component	GO:0005938	cell cortex		1.692e-06	0.00124	1.938e-05	0.0001391	28	266	CFL1,HNRNPK,EZR,GLRX3,APC,CRIP2,MAPRE1,RGS20,NSMF,PRKCZ,CTNNB1,SNCA,GAD1,ARHGAP32,MYH10,MYO6,MYO10,SPTAN1,SPTBN1,NCL,ITPR2,ARHGEF9,DLG4,PCLO,CAPZA2,EEF1A1,FLOT1,EPB41L2
		GO: Cellular Component	GO:0044853	plasma membrane raft		2.726e-06	0.001998	3.074e-05	0.0002206	16	105	GRK2,EZR,SORBS1,PRKACA,PRKAR1A,CTNNB1,ATP1A1,ATP1A2,NOS1AP,BMPR1A,BMPR2,MLC1,CAV2,SPRED1,EMP2,FLOT1
		GO: Cellular Component	GO:0030672	synaptic vesicle membrane		3.161e-06	0.002317	3.458e-05	0.0002481	12	61	RAB11B,SYNPR,SCAMP1,RPH3A,PTPRN2,SV2B,VAMP1,SYN1,SYN2,SYT1,DNM1L,SYNGR1
		GO: Cellular Component	GO:0099501	exocytic vesicle membrane		3.161e-06	0.002317	3.458e-05	0.0002481	12	61	RAB11B,SYNPR,SCAMP1,RPH3A,PTPRN2,SV2B,VAMP1,SYN1,SYN2,SYT1,DNM1L,SYNGR1
		GO: Cellular Component	GO:0044449	contractile fiber part		3.339e-06	0.002448	3.6e-05	0.0002583	24	215	PDE4B,ACTG1,FKBP1A,SDC4,SORBS2,ANK2,ANK3,NEBL,GLRX3,ARF1,PARVA,CTNNB1,NOS1AP,SPTAN1,SPTBN1,SRI,CALM1,CALM2,SYNE1,DNAJB6,ENO1,RPL4,RPL6,RPL17
		GO: Cellular Component	GO:0031984	organelle subcompartment		3.822e-06	0.002802	4.06e-05	0.0002913	32	341	BACE1,ZFYVE1,SORT1,ATP8A1,CLTC,FKBP1A,MOB4,SCAMP1,TMEM59,ST3GAL2,APP,RAB14,ARF1,ARL1,RAB3GAP1,RGS20,NSG2,VAMP4,RAB21,YIPF5,SLC9A7,PCSK1N,RAB6A,RAC1,NSF,PCLO,VTI1A,ATP9A,CIT,BCAP31,SAR1B,STX6
		GO: Cellular Component	GO:0044455	mitochondrial membrane part		4.286e-06	0.003142	4.488e-05	0.000322	22	189	TIMM23,FUNDC1,TIMM17A,UQCRH,ATP5PD,SDHA,COQ5,COX6A1,SNCA,ATP5F1A,ATP5F1B,ATP5PF,TOMM20,NDUFA8,NDUFA9,NDUFB8,NDUFB9,NDUFS4,NDUFV2,TOMM70,AFG3L2,NDUFA13
		GO: Cellular Component	GO:0043292	contractile fiber		4.63e-06	0.003394	4.757e-05	0.0003413	25	234	PDE4B,ACTG1,FKBP1A,SDC4,SORBS2,ANK2,ANK3,NEBL,GLRX3,ARF1,PARVA,CTNNB1,NOS1AP,SPTAN1,SPTBN1,SRI,DBI,CALM1,CALM2,SYNE1,DNAJB6,ENO1,RPL4,RPL6,RPL17
		GO: Cellular Component	GO:0044304	main axon		4.672e-06	0.003425	4.757e-05	0.0003413	13	74	MAPT,MBP,CADM1,ANK3,APP,SLC1A2,SIRT2,SPTAN1,SPTBN1,KCNAB1,DLG1,DLG4,DNM1
		GO: Cellular Component	GO:0030016	myofibril		4.987e-06	0.003655	5.007e-05	0.0003593	24	220	PDE4B,ACTG1,FKBP1A,SDC4,SORBS2,ANK2,ANK3,NEBL,GLRX3,ARF1,PARVA,CTNNB1,NOS1AP,SPTAN1,SPTBN1,SRI,CALM1,CALM2,SYNE1,DNAJB6,ENO1,RPL4,RPL6,RPL17
		GO: Cellular Component	GO:0022627	cytosolic small ribosomal subunit		5.352e-06	0.003923	5.301e-05	0.0003804	10	44	RPS3,RPS5,RPS6,RPS15,RPS15A,RPS17,RPS19,RPS21,RPS23,RPS24
		GO: Cellular Component	GO:0016529	sarcoplasmic reticulum		7.481e-06	0.005483	7.311e-05	0.0005246	12	66	FKBP1A,ANK3,SAR1A,ATP2A2,NOS1AP,SRI,ITPR2,CACNB1,CALR,CALU,CAMK2B,JPH3
		GO: Cellular Component	GO:0030135	coated vesicle		7.8e-06	0.005717	7.523e-05	0.0005398	25	241	SORT1,AP2M1,CLTC,HSPA8,SCAMP1,APP,RAB14,ARF1,DNAJC5,TMED9,CLINT1,GAD1,MYO6,YIPF5,SNAP91,MLC1,SYT1,NRGN,HIP1R,VTI1A,ECE1,BCAP31,SAR1B,LRP1,STX6
		GO: Cellular Component	GO:0030426	growth cone		8.082e-06	0.005924	7.693e-05	0.000552	21	182	MAPT,CYTH2,PREX1,APC,APP,SIRT2,CSNK1E,SNCA,MYH10,MYO5A,GAP43,NCAM1,PTPRZ1,KIF5B,CALM1,CALM2,NTRK2,PCLO,RAPGEF4,STMN2,THY1
		GO: Cellular Component	GO:0030017	sarcomere		9.131e-06	0.006693	8.513e-05	0.0006108	22	198	PDE4B,FKBP1A,SORBS2,ANK2,ANK3,NEBL,GLRX3,ARF1,PARVA,CTNNB1,NOS1AP,SPTAN1,SPTBN1,SRI,CALM1,CALM2,SYNE1,DNAJB6,ENO1,RPL4,RPL6,RPL17
		GO: Cellular Component	GO:0031966	mitochondrial membrane		9.175e-06	0.006726	8.513e-05	0.0006108	51	694	ACADL,RPS3,MRPL30,TIMM23,FUNDC1,TIMM17A,UQCRH,ATP5PD,SLC25A23,SDHA,VDAC3,PGS1,COQ5,ATCAY,COX6A1,COX6B1,COX7C,ATF2,PPP1CC,PPP2R2B,MRPL48,GHITM,SNCA,YME1L1,ATP5F1A,ATP5F1B,ATP5PF,SNPH,TOMM20,NDUFA8,NDUFA9,NDUFB8,NDUFB9,NDUFS4,NDUFV2,TOMM70,AFG3L2,VAMP1,GOT2,ACSL6,NRGN,DNM1L,TMBIM6,SLC25A22,NDUFA13,CYB5B,RMDN3,TRAP1,PEBP1,CYCS,HADHB
		GO: Cellular Component	GO:0005740	mitochondrial envelope		1.084e-05	0.007948	9.935e-05	0.0007128	53	736	ACADL,RPS3,MRPL30,TIMM23,FUNDC1,TIMM17A,UQCRH,ATP5PD,SLC25A23,SDHA,VDAC3,PGS1,COQ5,ATCAY,COX6A1,COX6B1,COX7C,ATF2,PPP1CC,PPP2R2B,MRPL48,GHITM,SNCA,YME1L1,ATP5F1A,ATP5F1B,ATP5PF,CHCHD10,SNPH,TOMM20,NDUFA8,NDUFA9,NDUFB8,NDUFB9,NDUFS4,NDUFV2,TOMM70,AFG3L2,VAMP1,GOT2,ACSL6,NRGN,DNM1L,TMBIM6,PDIA3,SLC25A22,NDUFA13,CYB5B,RMDN3,TRAP1,PEBP1,CYCS,HADHB
		GO: Cellular Component	GO:0098791	Golgi subcompartment		1.12e-05	0.008211	0.0001014	0.0007273	30	326	BACE1,ZFYVE1,SORT1,ATP8A1,CLTC,MOB4,SCAMP1,TMEM59,ST3GAL2,APP,RAB14,ARF1,ARL1,RGS20,NSG2,VAMP4,RAB21,YIPF5,SLC9A7,PCSK1N,RAB6A,RAC1,NSF,PCLO,VTI1A,ATP9A,CIT,BCAP31,SAR1B,STX6
		GO: Cellular Component	GO:0030427	site of polarized growth		1.231e-05	0.009025	0.0001101	0.0007897	21	187	MAPT,CYTH2,PREX1,APC,APP,SIRT2,CSNK1E,SNCA,MYH10,MYO5A,GAP43,NCAM1,PTPRZ1,KIF5B,CALM1,CALM2,NTRK2,PCLO,RAPGEF4,STMN2,THY1
		GO: Cellular Component	GO:0005790	smooth endoplasmic reticulum		1.389e-05	0.01018	0.0001226	0.0008799	9	39	TTYH1,HSP90B1,MAP2,GABARAP,RTN1,APP,SRI,CALR,PDIA3
		GO: Cellular Component	GO:0044440	endosomal part		1.569e-05	0.0115	0.0001369	0.0009824	36	434	ZDHHC2,RAB11B,BACE1,SORT1,AP2M1,CLTC,STX7,SCAMP1,CHMP5,TMEM59,APP,RAB14,NSG2,ATP6V0E2,VPS35,RAB21,CTSL,SNX2,SNX5,ARHGAP32,ATP6V0B,ATP6AP1,VPS4A,PIP4P1,SLC9A7,RAC1,RAB12,PLEKHB2,NTRK2,LAMP1,VTI1A,ATP9A,ECE1,ABCA5,ACAP2,ATP6V0A2
		GO: Cellular Component	GO:0032587	ruffle membrane		1.958e-05	0.01435	0.0001688	0.001211	13	84	RPS3,CFL1,HSP90AA1,EZR,APC,MYO6,PTPRZ1,TESC,RAC1,PIP5K1C,EEF1A1,PLEKHA1,SPATA13
		GO: Cellular Component	GO:0015629	actin cytoskeleton		2.165e-05	0.01587	0.0001845	0.001324	38	476	KLHL2,ACACA,CFL1,TMEM63B,ACTG1,GABARAP,HNRNPK,ADD1,MTPN,EZR,SORBS2,NEBL,GAS7,SORBS1,CASK,CSRP1,DYNLL2,PRKCZ,SNCA,FYN,STAG2,ARHGAP32,MYH10,MYO5A,MYO6,MYO10,SPTAN1,SPTBN1,MPRIP,GNG12,NMT1,RAC1,KALRN,CAPZA2,CIT,EEF1A1,FLOT1,EPB41L2
		GO: Cellular Component	GO:0045211	postsynaptic membrane		2.259e-05	0.01656	0.0001903	0.001366	23	225	GPHN,LRRTM4,ANK2,ANK3,ARF1,ARRB1,NSMF,NSG1,GABRA1,GABRB3,GABRG2,ARHGAP32,CLSTN3,SNAP91,PTPRZ1,GLRB,DLG1,DLG4,SYNE1,NTRK2,PSD3,GRIA3,NCS1
		GO: Cellular Component	GO:0016528	sarcoplasm		2.512e-05	0.01842	0.0002093	0.001501	12	74	FKBP1A,ANK3,SAR1A,ATP2A2,NOS1AP,SRI,ITPR2,CACNB1,CALR,CALU,CAMK2B,JPH3
		GO: Cellular Component	GO:0033178	proton-transporting two-sector ATPase complex, catalytic domain		2.832e-05	0.02076	0.0002333	0.001674	6	17	ATP6V1H,ATP5F1A,ATP5F1B,ATP6V1C1,ATP6V1E1,ATP6AP1
		GO: Cellular Component	GO:0044429	mitochondrial part		3.653e-05	0.02677	0.0002969	0.00213	64	987	ABAT,ACADL,PDHB,RPS3,ACO2,MRPL30,TIMM23,FUNDC1,TIMM17A,AK4,UQCRH,ATP5PD,SLC25A23,SDHA,VDAC3,PGS1,COQ5,ATCAY,COX6A1,COX6B1,COX7C,ATF2,PPP1CC,PPP2R2B,MRPL48,GHITM,SNCA,YME1L1,ATP5F1A,ATP5F1B,ATP5PF,CHCHD10,SNPH,TOMM20,NDUFA8,NDUFA9,SUCLA2,NDUFB8,NDUFB9,NDUFS4,NDUFV2,TOMM70,AFG3L2,VAMP1,DLD,DLST,SARDH,ALDH5A1,GOT2,ACSL6,NRGN,DNM1L,TMBIM6,PDIA3,SLC25A22,NDUFA13,CYB5B,RMDN3,TRAP1,OXCT1,PEBP1,CYCS,HADH…
		GO: Cellular Component	GO:0099513	polymeric cytoskeletal fiber		3.706e-05	0.02717	0.0002969	0.00213	50	712	MAP1A,MAP2,MAP4,MAPT,ACTG1,GABARAP,SKA2,TUBA1B,MID1IP1,HSPA8,EZR,NICN1,NEK7,APC,GAS7,CCT2,MAPRE1,SIRT2,RGS20,CCT5,DYNLL2,DYNLL1,PRKCZ,FYN,SNPH,MYO5A,MYO6,KIF1B,HSPH1,MAP1LC3A,GNG12,TUBA1A,DLG1,KIF5B,KIF5C,MAP1LC3B,DNM1,CAMSAP2,DYNC1H1,DYNC1I2,RAC1,TLK2,CALM1,CALM2,TPPP,DNM1L,KIF3A,TTLL7,RMDN3,DYNC1LI1
		GO: Cellular Component	GO:0010008	endosome membrane		3.727e-05	0.02732	0.0002969	0.00213	33	399	ZDHHC2,RAB11B,BACE1,SORT1,AP2M1,CLTC,STX7,SCAMP1,CHMP5,TMEM59,RAB14,NSG2,ATP6V0E2,RAB21,SNX2,SNX5,ARHGAP32,ATP6V0B,ATP6AP1,VPS4A,PIP4P1,SLC9A7,RAC1,RAB12,PLEKHB2,NTRK2,LAMP1,VTI1A,ATP9A,ECE1,ABCA5,ACAP2,ATP6V0A2
		GO: Cellular Component	GO:0031253	cell projection membrane		4.103e-05	0.03008	0.0003234	0.002321	29	332	TTYH1,RPS3,CFL1,SLC12A5,HSP90AA1,EZR,APC,SLC1A2,CASK,MAPRE1,CTNNB1,ATP2B1,NDRG4,GABRG2,GAP43,MYO6,MYO10,SPTBN1,DDN,PTPRZ1,DLG1,SGCE,TESC,RAC1,PIP5K1C,EEF1A1,RDH11,PLEKHA1,SPATA13
		GO: Cellular Component	GO:0099512	supramolecular fiber		5.104e-05	0.03741	0.000398	0.002856	50	721	MAP1A,MAP2,MAP4,MAPT,ACTG1,GABARAP,SKA2,TUBA1B,MID1IP1,HSPA8,EZR,NICN1,NEK7,APC,GAS7,CCT2,MAPRE1,SIRT2,RGS20,CCT5,DYNLL2,DYNLL1,PRKCZ,FYN,SNPH,MYO5A,MYO6,KIF1B,HSPH1,MAP1LC3A,GNG12,TUBA1A,DLG1,KIF5B,KIF5C,MAP1LC3B,DNM1,CAMSAP2,DYNC1H1,DYNC1I2,RAC1,TLK2,CALM1,CALM2,TPPP,DNM1L,KIF3A,TTLL7,RMDN3,DYNC1LI1
		GO: Cellular Component	GO:0005905	clathrin-coated pit		6.394e-05	0.04687	0.0004933	0.00354	11	69	SORT1,AP2M1,CLTC,VLDLR,APP,ARRB1,MYO6,SNAP91,HIP1R,DNM1L,LRP1
		GO: Cellular Component	GO:0060077	inhibitory synapse		8.029e-05	0.05886	0.0006131	0.004399	6	20	GPHN,NPTN,GABRB3,GABRG2,GAD1,PCLO
		GO: Cellular Component	GO:0005901	caveola		8.247e-05	0.06045	0.0006232	0.004471	13	96	GRK2,SORBS1,CTNNB1,ATP1A1,ATP1A2,NOS1AP,BMPR1A,BMPR2,MLC1,CAV2,SPRED1,EMP2,FLOT1
		GO: Cellular Component	GO:0030141	secretory granule		9.144e-05	0.06702	0.0006816	0.004891	32	400	ABCA3,CHGB,AP2M1,ATP8A1,STX7,SCG5,SCAMP1,APLP2,APP,RAB14,RPH3A,SNCA,MYO5A,SRI,PTPRN2,SV2B,VAMP1,VPS13A,SYT1,DLD,PCSK1N,RAB12,CALR,LAMP1,SPAG9,CAV2,ECE1,PDIA3,NCS1,TMSB4X,CDC42,ATP6V0A2
		GO: Cellular Component	GO:0043198	dendritic shaft		9.299e-05	0.06816	0.0006816	0.004891	10	60	MAP2,SLC12A5,GRK2,PREX1,HSPA8,APP,SLC1A2,CTNNB1,NSF,GRIA3
		GO: Cellular Component	GO:0030315	T-tubule		9.299e-05	0.06816	0.0006816	0.004891	10	60	CLTC,EZR,ANK2,ANK3,ATP1A1,ATP1A2,NOS1AP,SRI,DLG1,CACNB1
		GO: Cellular Component	GO:0005844	polysome		9.523e-05	0.0698	0.0006854	0.004918	9	49	ABCF1,RPS3,RPS6,VBP1,FUS,MSI2,CALR,RPL7A,RPL17
		GO: Cellular Component	GO:0015935	small ribosomal subunit		9.537e-05	0.06991	0.0006854	0.004918	11	72	RPS3,RPS5,RPS6,RPS15,RPS15A,RPS17,RPS19,RPS21,RPS23,RPS24,NPM1
		GO: Cellular Component	GO:0005875	microtubule associated complex		0.000118	0.0865	0.0008398	0.006026	17	156	MAP1A,MAP2,MAP4,MAPT,GABARAP,RABGAP1,YWHAE,DYNLL2,DYNLL1,KIF1B,KIF5B,KIF5C,MAP1LC3B,DYNC1H1,DYNC1I2,KIF3A,DYNC1LI1
		GO: Cellular Component	GO:0043204	perikaryon		0.0001253	0.09185	0.0008832	0.006337	16	142	PENK,SLC12A5,HSPA8,CPNE5,SIRT2,NSMF,FUS,DDN,NELL2,KCNAB1,GOT2,CACNA1A,CAMK2B,NTRK2,GRIA3,TTLL7
		GO: Cellular Component	GO:0061202	clathrin-sculpted gamma-aminobutyric acid transport vesicle membrane		0.0001377	0.101	0.0009525	0.006834	4	8	HSPA8,DNAJC5,GAD1,SYT1
		GO: Cellular Component	GO:0061200	clathrin-sculpted gamma-aminobutyric acid transport vesicle		0.0001377	0.101	0.0009525	0.006834	4	8	HSPA8,DNAJC5,GAD1,SYT1
		GO: Cellular Component	GO:0005746	mitochondrial respiratory chain		0.0001391	0.102	0.0009532	0.006839	11	75	UQCRH,SDHA,COX6A1,SNCA,NDUFA8,NDUFA9,NDUFB8,NDUFB9,NDUFS4,NDUFV2,NDUFA13
		GO: Cellular Component	GO:0070469	respiratory chain		0.0001783	0.1307	0.00121	0.008683	12	90	UQCRH,SDHA,COX6A1,SNCA,NDUFA8,NDUFA9,NDUFB8,NDUFB9,NDUFS4,NDUFV2,NDUFA13,CYCS
		GO: Cellular Component	GO:0000153	cytoplasmic ubiquitin ligase complex		0.0001864	0.1367	0.001254	0.008996	5	15	MARCH6,SEL1L,OS9,RBX1,ELOB
		GO: Cellular Component	GO:0031201	SNARE complex		0.0002074	0.152	0.001374	0.009858	9	54	STX7,NAPB,VAMP4,CPLX1,VAMP1,SYN2,SYT1,VTI1A,STX6
		GO: Cellular Component	GO:0045271	respiratory chain complex I		0.0002118	0.1553	0.001374	0.009858	8	43	SNCA,NDUFA8,NDUFA9,NDUFB8,NDUFB9,NDUFS4,NDUFV2,NDUFA13
		GO: Cellular Component	GO:0030964	NADH dehydrogenase complex		0.0002118	0.1553	0.001374	0.009858	8	43	SNCA,NDUFA8,NDUFA9,NDUFB8,NDUFB9,NDUFS4,NDUFV2,NDUFA13
		GO: Cellular Component	GO:0005747	mitochondrial respiratory chain complex I		0.0002118	0.1553	0.001374	0.009858	8	43	SNCA,NDUFA8,NDUFA9,NDUFB8,NDUFB9,NDUFS4,NDUFV2,NDUFA13
		GO: Cellular Component	GO:0016323	basolateral plasma membrane		0.0002159	0.1582	0.001388	0.009959	22	244	CADM1,GRK2,HSP90AA1,EZR,ANK2,ANK3,SLC40A1,CASK,ARRB1,CTNNB1,ATP1A1,SLC4A4,ATP2B1,NDRG4,ERBIN,BMPR2,MLC1,DLG1,DLG4,RAPGEF4,SLC4A10,FLOT1
		GO: Cellular Component	GO:0019898	extrinsic component of membrane		0.0002199	0.1612	0.001402	0.01006	24	278	GPHN,ZFYVE1,EZR,COQ5,APC,RPH3A,ARRB1,WDFY3,CTNNB1,FYN,ATP2A2,SNX2,SNX5,GNG12,VPS13A,KCNAB1,DLG4,GNB2,NMT1,RAC1,KRAS,CAV2,ENO1,EPB41L2
		GO: Cellular Component	GO:0031300	intrinsic component of organelle membrane		0.00023	0.1686	0.001453	0.01043	25	296	MARCH6,TIMM23,FUNDC1,EMC8,RTN1,SLC22A17,SYNPR,TIMM17A,SEC61A1,SPCS1,ST3GAL2,SARAF,EMC7,ATP6V1G2,TOMM20,DHCR7,AFG3L2,EMC10,CALR,RTN4,TVP23B,ECE1,PDIA3,BCAP31,INSIG2
		GO: Cellular Component	GO:0098803	respiratory chain complex		0.0002398	0.1757	0.001502	0.01078	10	67	SDHA,COX6A1,SNCA,NDUFA8,NDUFA9,NDUFB8,NDUFB9,NDUFS4,NDUFV2,NDUFA13
		GO: Cellular Component	GO:0030139	endocytic vesicle		0.0002732	0.2003	0.001697	0.01218	23	265	RAB11B,HSP90B1,AP2M1,CLTC,STX7,HSP90AA1,RAB14,ATP6V0E2,ATP6V0B,MYO6,HSPH1,SNAP91,DLG4,KIF5B,CALR,CAMK2A,CAMK2B,GRIA3,LAMP1,RABEP1,LRP1,STX6,ATP6V0A2
		GO: Cellular Component	GO:0031301	integral component of organelle membrane		0.0002866	0.2101	0.001765	0.01267	24	283	MARCH6,TIMM23,FUNDC1,EMC8,RTN1,SLC22A17,SYNPR,TIMM17A,SEC61A1,SPCS1,ST3GAL2,SARAF,EMC7,ATP6V1G2,TOMM20,DHCR7,AFG3L2,EMC10,CALR,RTN4,TVP23B,PDIA3,BCAP31,INSIG2
		GO: Cellular Component	GO:0098562	cytoplasmic side of membrane		0.0002951	0.2163	0.001802	0.01293	18	184	GPHN,DNAJA1,EZR,ARRB1,RAB21,FYN,ATP2A2,ATP2B1,SNX5,GNG12,KCNAB1,DLG1,DLG4,GNB2,KRAS,CAV2,EEF1A1,EEF1A2
		GO: Cellular Component	GO:0000139	Golgi membrane		0.0003032	0.2222	0.001837	0.01318	47	716	CYTH2,GABARAP,RTN3,SORT1,ATP8A1,PI4KA,CLTC,PITPNB,MOB4,TMEM59,ST3GAL2,APP,RAB14,RAB6B,ARF1,ARL1,ARRB1,NSG2,NSG1,TMED9,VAMP4,RAB21,ARHGAP32,CLSTN3,NCAM1,B3GAT3,YIPF5,TMEM132A,SLC9A7,SERINC3,RAB6A,RAC1,RAB12,NRGN,NSF,COP1,VTI1A,TVP23B,CAV2,ERGIC1,BCAP31,ABCA5,SAR1B,EMP2,CDC42,STX6,CHP1
		GO: Cellular Component	GO:0055037	recycling endosome		0.0003507	0.257	0.002107	0.01512	15	140	ZDHHC2,RAB11B,STX7,SCAMP1,RAB14,MYO5A,TUBA1A,MLC1,SLC9A7,RAB12,PLEKHB2,ATP9A,RABEP1,NISCH,STX6
		GO: Cellular Component	GO:0019866	organelle inner membrane		0.0003568	0.2615	0.002126	0.01526	39	564	RPS3,MRPL30,TIMM23,TIMM17A,UQCRH,ATP5PD,SLC25A23,SDHA,VDAC3,PGS1,COQ5,COX6A1,COX6B1,COX7C,MRPL48,GHITM,SNCA,YME1L1,TOR1AIP1,ATP5F1A,ATP5F1B,ATP5PF,DPY19L3,NDUFA8,NDUFA9,NDUFB8,NDUFB9,NDUFS4,NDUFV2,AFG3L2,GOT2,DPY19L1,CAV2,SLC25A22,NDUFA13,CYB5B,TRAP1,CYCS,HADHB
		GO: Cellular Component	GO:1990204	oxidoreductase complex		0.0003628	0.2659	0.002127	0.01526	12	97	PDHB,SDHA,SNCA,NDUFA8,NDUFA9,NDUFB8,NDUFB9,NDUFS4,NDUFV2,DLD,DLST,NDUFA13
		GO: Cellular Component	GO:0030863	cortical cytoskeleton		0.0003628	0.2659	0.002127	0.01526	12	97	CFL1,EZR,MAPRE1,NSMF,SPTAN1,SPTBN1,DLG4,PCLO,CAPZA2,EEF1A1,FLOT1,EPB41L2
		GO: Cellular Component	GO:0030658	transport vesicle membrane		0.0004281	0.3138	0.00249	0.01787	16	158	RAB11B,SYNPR,CLTC,SCAMP1,RPH3A,PTPRN2,SV2B,VAMP1,SYN1,SYN2,SYT1,NRGN,DNM1L,VTI1A,SAR1B,SYNGR1
		GO: Cellular Component	GO:0005770	late endosome		0.000466	0.3416	0.002686	0.01927	20	224	TPT1,BACE1,KIDINS220,STX7,HSPA8,TMEM59,RAB14,SLC40A1,ARF1,NSG2,VPS35,LGMN,MYO5A,VPS4A,MAP1LC3A,PIP4P1,RAP1A,LAMP1,VTI1A,ABCA5
		GO: Cellular Component	GO:0031594	neuromuscular junction		0.000469	0.3438	0.002686	0.01927	9	60	ANK3,APP,PRKACA,PRKAR1A,MYH10,PTN,DLG1,PCLO,SYNGR1
		GO: Cellular Component	GO:0031968	organelle outer membrane		0.0006316	0.463	0.003589	0.02575	18	196	FUNDC1,VDAC3,ATF2,PPP1CC,PPP2R2B,SNCA,TOMM20,TOMM70,DHCR7,VAMP1,ACSL6,SYNE1,DNM1L,CYB5B,RMDN3,PEBP1,HADHB,NUTF2
		GO: Cellular Component	GO:0033017	sarcoplasmic reticulum membrane		0.0006606	0.4842	0.003725	0.02673	7	39	FKBP1A,ATP2A2,NOS1AP,SRI,ITPR2,CAMK2B,JPH3
		GO: Cellular Component	GO:0042734	presynaptic membrane		0.0006754	0.4951	0.003754	0.02693	10	76	SLC1A2,CASK,NPTN,RIMS2,SNPH,SNAP91,SYT1,DLG1,CAMK2A,UNC13C
		GO: Cellular Component	GO:0044431	Golgi apparatus part		0.000676	0.4955	0.003754	0.02693	56	928	CYTH2,BACE1,GABARAP,RTN3,ZFYVE1,SORT1,ATP8A1,PI4KA,CLTC,PITPNB,SDC4,MOB4,SCAMP1,TMEM59,ST3GAL2,APP,RAB14,RAB6B,ARF1,ARL1,ARRB1,RGS20,NSG2,NSG1,TMED9,VAMP4,RAB21,ARHGAP32,CLSTN3,NCAM1,B3GAT3,YIPF5,TMEM132A,SLC9A7,SERINC3,PCSK1N,RAB6A,RAC1,RAB12,NRGN,NSF,PCLO,COP1,VTI1A,TVP23B,CAV2,ATP9A,CIT,ERGIC1,BCAP31,ABCA5,SAR1B,EMP2,CDC42,STX6,CHP1
		GO: Cellular Component	GO:0030018	Z disc		0.0007078	0.5188	0.003901	0.02799	13	119	PDE4B,FKBP1A,SORBS2,ANK2,ANK3,NEBL,GLRX3,PARVA,CTNNB1,NOS1AP,SPTAN1,SRI,DNAJB6
		GO: Cellular Component	GO:0005743	mitochondrial inner membrane		0.0007246	0.5312	0.003964	0.02844	35	507	RPS3,MRPL30,TIMM23,TIMM17A,UQCRH,ATP5PD,SLC25A23,SDHA,VDAC3,PGS1,COQ5,COX6A1,COX6B1,COX7C,MRPL48,GHITM,SNCA,YME1L1,ATP5F1A,ATP5F1B,ATP5PF,NDUFA8,NDUFA9,NDUFB8,NDUFB9,NDUFS4,NDUFV2,AFG3L2,GOT2,SLC25A22,NDUFA13,CYB5B,TRAP1,CYCS,HADHB
		GO: Cellular Component	GO:0005802	trans-Golgi network		0.0007667	0.562	0.004163	0.02987	19	216	BACE1,ATP8A1,CLTC,SCAMP1,APP,RAB14,ARF1,ARL1,RGS20,VAMP4,RAB21,SLC9A7,PCSK1N,RAB6A,RAC1,PCLO,VTI1A,ATP9A,STX6
		GO: Cellular Component	GO:0019897	extrinsic component of plasma membrane		0.0008374	0.6138	0.004511	0.03236	15	152	GPHN,APC,ARRB1,CTNNB1,FYN,ATP2A2,SNX5,GNG12,KCNAB1,DLG4,GNB2,RAC1,KRAS,CAV2,ENO1
		GO: Cellular Component	GO:0005791	rough endoplasmic reticulum		0.0008431	0.618	0.004511	0.03236	11	92	MAP2,SEC61A1,VDAC3,APP,RAB14,SNCA,CCDC47,NTRK2,BCAP31,PEBP1,LRPAP1
		GO: Cellular Component	GO:0060198	clathrin-sculpted vesicle		0.0008602	0.6305	0.004569	0.03278	4	12	HSPA8,DNAJC5,GAD1,SYT1
		GO: Cellular Component	GO:0030176	integral component of endoplasmic reticulum membrane		0.0008758	0.642	0.004619	0.03314	14	137	MARCH6,EMC8,RTN1,SEC61A1,SPCS1,SARAF,EMC7,DHCR7,EMC10,CALR,RTN4,PDIA3,BCAP31,INSIG2
		GO: Cellular Component	GO:0030027	lamellipodium		0.0009321	0.6832	0.00488	0.03501	17	186	KLHL2,CFL1,EVL,SORBS2,APC,APP,PARVA,CTNNB1,SNX2,MYH10,MYO10,PTPRZ1,TESC,RAC1,STMN2,FLOT1,SPATA13
		GO: Cellular Component	GO:0019867	outer membrane		0.0009513	0.6973	0.004946	0.03549	18	203	FUNDC1,VDAC3,ATF2,PPP1CC,PPP2R2B,SNCA,TOMM20,TOMM70,DHCR7,VAMP1,ACSL6,SYNE1,DNM1L,CYB5B,RMDN3,PEBP1,HADHB,NUTF2
		GO: Cellular Component	GO:0000835	ER ubiquitin ligase complex		0.001059	0.7762	0.005391	0.03868	3	6	MARCH6,SEL1L,OS9
		GO: Cellular Component	GO:0042584	chromaffin granule membrane		0.001059	0.7762	0.005391	0.03868	3	6	ATP8A1,SRI,SYT1
		GO: Cellular Component	GO:0031466	Cul5-RING ubiquitin ligase complex		0.001059	0.7762	0.005391	0.03868	3	6	RNF7,RBX1,ELOB
		GO: Cellular Component	GO:0031227	intrinsic component of endoplasmic reticulum membrane		0.001243	0.9112	0.006284	0.04509	14	142	MARCH6,EMC8,RTN1,SEC61A1,SPCS1,SARAF,EMC7,DHCR7,EMC10,CALR,RTN4,PDIA3,BCAP31,INSIG2
		GO: Cellular Component	GO:0005730	nucleolus		0.001286	0.943	0.006459	0.04634	53	891	ACACA,MAP2,RPS3,RPS6,RPS19,CHD3,RPS23,CIRBP,RPL23,RPL7L1,UBE2I,DDX54,HSPA8,EZR,SRSF5,PPP1CC,CASK,CCT5,MORF4L2,DROSHA,KDM2A,STAG2,CHTOP,MXI1,MYO10,SPTBN1,NCL,DHX9,TMX1,SUB1,NPM1,VMP1,YPEL3,PAPD5,CAMK4,GRB2,EEF1A1,AKTIP,PSIP1,PAFAH1B2,LRP1,RPL13A,RPL3,RPL4,RPL5,RPL6,CRBN,RPL7A,RPL9,RPL11,RPL12,RPL18,RPL19
		GO: Cellular Component	GO:0045177	apical part of cell		0.001335	0.9786	0.006657	0.04777	30	428	AKR1A1,GRK2,HSP90AA1,EZR,VLDLR,SORBS2,ANK2,APP,RAB14,SLC1A1,PRKCZ,CTNNB1,ATP1A1,ATP2B1,ATP2B2,LGMN,ATP6V1C1,AHCYL1,ATP6V1E1,MYO6,BMPR2,MLC1,RAPGEF4,PDIA3,MAL2,THY1,PEBP1,EMP2,FLOT1,CDC42
		GO: Cellular Component	GO:0030665	clathrin-coated vesicle membrane		0.001351	0.9903	0.006691	0.04801	10	83	AP2M1,CLTC,HSPA8,DNAJC5,GAD1,MYO6,SNAP91,SYT1,NRGN,HIP1R
		GO: Cellular Component	GO:0036464	cytoplasmic ribonucleoprotein granule		0.001422	1	0.006997	0.0502	14	144	MAPT,RPS6,CIRBP,NOCT,PABPC1,NCL,DHX9,TUBA1A,RAC1,PUM2,G3BP1,UHMK1,CDC42,RPL6
		GO: Cellular Component	GO:0033177	proton-transporting two-sector ATPase complex, proton-transporting domain		0.001615	1	0.007865	0.05643	5	23	ATP5PD,ATP6V0E2,ATP5PF,ATP6V0B,ATP6V0A2
		GO: Cellular Component	GO:0044291	cell-cell contact zone		0.00162	1	0.007865	0.05643	9	71	ANK2,ANK3,CTNNB1,ATP1A1,ATP1A2,ATP2A2,SPTAN1,DLG1,FLOT1
		GO: Cellular Component	GO:0016471	vacuolar proton-transporting V-type ATPase complex		0.001635	1	0.007885	0.05658	4	14	ATP6V1H,ATP6V0B,ATP6V1G2,ATP6V0A2
		GO: Cellular Component	GO:0014704	intercalated disc		0.001682	1	0.008057	0.05781	8	58	ANK2,ANK3,CTNNB1,ATP1A1,ATP1A2,ATP2A2,SPTAN1,DLG1
		GO: Cellular Component	GO:0008180	COP9 signalosome		0.001756	1	0.008357	0.05996	6	34	COPS2,DYNLL1,ATP5F1A,GRB2,FLOT1,EPB41L2
		GO: Cellular Component	GO:0005795	Golgi stack		0.001848	1	0.00874	0.06271	13	132	ZFYVE1,SORT1,MOB4,TMEM59,ST3GAL2,RAB14,NSG2,RAB21,YIPF5,NSF,CIT,BCAP31,SAR1B
		GO: Cellular Component	GO:0005819	spindle		0.002112	1	0.009925	0.07122	23	308	MAP4,RPS3,SKA2,CLTC,AKT1,NEK7,APP,MAPRE1,PPP2CA,SIRT2,DYNLL1,CTNNB1,MYH10,VPS4A,NPM1,CALM1,CALM2,CAMK2B,SYNE1,KIF3A,RMDN3,DYNC1LI1,CDC42
		GO: Cellular Component	GO:0033270	paranode region of axon		0.002162	1	0.01009	0.07242	4	15	ANK3,SIRT2,SPTAN1,DLG1
		GO: Cellular Component	GO:0031674	I band		0.002259	1	0.01048	0.07521	13	135	PDE4B,FKBP1A,SORBS2,ANK2,ANK3,NEBL,GLRX3,PARVA,CTNNB1,NOS1AP,SPTAN1,SRI,DNAJB6
		GO: Cellular Component	GO:0030667	secretory granule membrane		0.002296	1	0.01059	0.07596	10	89	ABCA3,ATP8A1,SCAMP1,APLP2,SNCA,SRI,PTPRN2,VAMP1,SYT1,CAV2
		GO: Cellular Component	GO:0035770	ribonucleoprotein granule		0.002369	1	0.01085	0.07788	14	152	MAPT,RPS6,CIRBP,NOCT,PABPC1,NCL,DHX9,TUBA1A,RAC1,PUM2,G3BP1,UHMK1,CDC42,RPL6
		GO: Cellular Component	GO:0009898	cytoplasmic side of plasma membrane		0.002422	1	0.01103	0.07911	15	169	GPHN,EZR,ARRB1,RAB21,FYN,ATP2A2,ATP2B1,SNX5,GNG12,KCNAB1,DLG1,DLG4,GNB2,KRAS,CAV2
		GO: Cellular Component	GO:0032589	neuron projection membrane		0.002641	1	0.01195	0.08575	7	49	SLC12A5,SLC1A2,ATP2B1,GABRG2,SPTBN1,DDN,SGCE
		GO: Cellular Component	GO:0044448	cell cortex part		0.002743	1	0.01229	0.08821	13	138	CFL1,EZR,MAPRE1,NSMF,PRKCZ,SPTAN1,SPTBN1,DLG4,PCLO,CAPZA2,EEF1A1,FLOT1,EPB41L2
		GO: Cellular Component	GO:0048786	presynaptic active zone		0.002751	1	0.01229	0.08821	6	37	RIMS2,GAD1,SYN1,NTRK2,PCLO,UNC13C
		GO: Cellular Component	GO:0031234	extrinsic component of cytoplasmic side of plasma membrane		0.002886	1	0.01282	0.09198	11	107	GPHN,ARRB1,FYN,ATP2A2,SNX5,GNG12,KCNAB1,DLG4,GNB2,KRAS,CAV2
		GO: Cellular Component	GO:0071682	endocytic vesicle lumen		0.003544	1	0.01565	0.1123	4	17	HSP90B1,HSP90AA1,HSPH1,CALR
		GO: Cellular Component	GO:0000421	autophagosome membrane		0.004021	1	0.01717	0.1232	5	28	GABARAP,WDFY3,MAP1LC3A,MAP1LC3B,VMP1
		GO: Cellular Component	GO:0097208	alveolar lamellar body		0.004076	1	0.01717	0.1232	3	9	ABCA3,RAB14,LAMP1
		GO: Cellular Component	GO:0097470	ribbon synapse		0.004076	1	0.01717	0.1232	3	9	ATP2A2,PCLO,KIF3A
		GO: Cellular Component	GO:0033180	proton-transporting V-type ATPase, V1 domain		0.004076	1	0.01717	0.1232	3	9	ATP6V1H,ATP6V1C1,ATP6AP1
		GO: Cellular Component	GO:0035748	myelin sheath abaxonal region		0.004076	1	0.01717	0.1232	3	9	SIRT2,PRKCZ,DLG1
		GO: Cellular Component	GO:0008290	F-actin capping protein complex		0.004076	1	0.01717	0.1232	3	9	ADD1,MTPN,CAPZA2
		GO: Cellular Component	GO:0042583	chromaffin granule		0.004076	1	0.01717	0.1232	3	9	ATP8A1,SRI,SYT1
		GO: Cellular Component	GO:0008091	spectrin		0.004076	1	0.01717	0.1232	3	9	SPTAN1,SPTBN1,EPB41L2
		GO: Cellular Component	GO:0098574	cytoplasmic side of lysosomal membrane		0.004378	1	0.01814	0.1302	2	3	EEF1A1,EEF1A2
		GO: Cellular Component	GO:0034750	Scrib-APC-beta-catenin complex		0.004378	1	0.01814	0.1302	2	3	APC,CTNNB1
		GO: Cellular Component	GO:0005776	autophagosome		0.004381	1	0.01814	0.1302	9	82	GABARAP,ZFYVE1,HSPA8,WDFY3,MAP1LC3A,MAP1LC3B,RAB12,VMP1,VTI1A
		GO: Cellular Component	GO:1902495	transmembrane transporter complex		0.00444	1	0.01828	0.1312	23	327	TTYH1,PDE4B,NRN1,LRRTM4,DPP10,PRKACA,ATP1A1,ATP1A2,ATP2A2,GABRA1,NOS1AP,GABRB3,GABRG2,GLRB,KCNAB1,DLG1,DLG4,CACNA1A,CACNB1,CALM1,CALM2,GRIA3,SHISA7
		GO: Cellular Component	GO:0005913	cell-cell adherens junction		0.004628	1	0.01895	0.136	8	68	CADM1,APC,SORBS1,SSX2IP,CTNNB1,SPTAN1,DLG1,FLOT1
		GO: Cellular Component	GO:0031985	Golgi cisterna		0.005357	1	0.0218	0.1564	10	100	SORT1,MOB4,TMEM59,ST3GAL2,NSG2,RAB21,YIPF5,CIT,BCAP31,SAR1B
		GO: Cellular Component	GO:0005868	cytoplasmic dynein complex		0.005428	1	0.0218	0.1564	4	19	DYNLL1,DYNC1H1,DYNC1I2,DYNC1LI1
		GO: Cellular Component	GO:0001891	phagocytic cup		0.005428	1	0.0218	0.1564	4	19	SNX5,CDC42SE2,RAC1,PIP5K1C
		GO: Cellular Component	GO:0032281	AMPA glutamate receptor complex		0.005471	1	0.0218	0.1564	5	30	NRN1,LRRTM4,DLG4,GRIA3,SHISA7
		GO: Cellular Component	GO:0030140	trans-Golgi network transport vesicle		0.005471	1	0.0218	0.1564	5	30	SORT1,CLTC,RAB14,TMED9,NRGN
		GO: Cellular Component	GO:1990351	transporter complex		0.005516	1	0.02182	0.1566	23	333	TTYH1,PDE4B,NRN1,LRRTM4,DPP10,PRKACA,ATP1A1,ATP1A2,ATP2A2,GABRA1,NOS1AP,GABRB3,GABRG2,GLRB,KCNAB1,DLG1,DLG4,CACNA1A,CACNB1,CALM1,CALM2,GRIA3,SHISA7
		GO: Cellular Component	GO:0005769	early endosome		0.005562	1	0.02182	0.1566	22	314	HMGB1,SORT1,STX7,RAB14,TRAK1,VPS35,TRAK2,RAB21,SNX2,SNX5,MYO5A,VPS4A,MLC1,NIPA1,RAC1,RAP1A,ATP9A,ECE1,RABEP1,NISCH,FLOT1,STX6
		GO: Cellular Component	GO:0044224	juxtaparanode region of axon		0.005656	1	0.02182	0.1566	3	10	SIRT2,KCNAB1,DLG4
		GO: Cellular Component	GO:0035253	ciliary rootlet		0.005656	1	0.02182	0.1566	3	10	APP,KIF5B,KIF5C
		GO: Cellular Component	GO:0072546	ER membrane protein complex		0.005656	1	0.02182	0.1566	3	10	EMC8,EMC7,EMC10
		GO: Cellular Component	GO:0033179	proton-transporting V-type ATPase, V0 domain		0.005656	1	0.02182	0.1566	3	10	ATP6V0E2,ATP6V0B,ATP6V0A2
		GO: Cellular Component	GO:0031672	A band		0.005931	1	0.02276	0.1633	6	43	ANK2,SPTBN1,ENO1,RPL4,RPL6,RPL17
		GO: Cellular Component	GO:0005635	nuclear envelope		0.005989	1	0.02286	0.164	29	454	ABCF1,SORT1,UBE2I,IPO8,HACD3,EI24,APC,APP,IPO9,NSMF,PRKCZ,WDFY3,SNCA,TOR1AIP1,NOS1AP,DPY19L3,MYO6,RAP1GAP2,ERBIN,DHCR7,PLCB1,DPY19L1,SYNE1,RTN4,PUM2,CAV2,MTMR6,EIF5A,NUTF2
		GO: Cellular Component	GO:0030175	filopodium		0.006155	1	0.02338	0.1677	10	102	TTYH1,EZR,APP,MYO5A,GAP43,MYO10,PTPRZ1,DYNC1H1,CDC42,SPATA13
		GO: Cellular Component	GO:0042383	sarcolemma		0.006239	1	0.02357	0.1691	13	152	CLTC,EZR,ANK2,ANK3,ATP1A1,ATP1A2,NOS1AP,SRI,DLG1,SGCE,CACNB1,LAMP1,FLOT1
		GO: Cellular Component	GO:0032590	dendrite membrane		0.00632	1	0.02376	0.1704	5	31	SLC12A5,ATP2B1,GABRG2,DDN,SGCE
		GO: Cellular Component	GO:0005741	mitochondrial outer membrane		0.006783	1	0.02537	0.182	14	171	FUNDC1,VDAC3,ATF2,PPP1CC,PPP2R2B,TOMM20,TOMM70,VAMP1,ACSL6,DNM1L,CYB5B,RMDN3,PEBP1,HADHB
		GO: Cellular Component	GO:0043202	lysosomal lumen		0.006966	1	0.02592	0.186	9	88	ACP2,HSPA8,SDC4,HSP90AA1,IDS,CTSL,GAA,LGMN,PSAP
		GO: Cellular Component	GO:0005815	microtubule organizing center		0.007098	1	0.02628	0.1885	38	646	RAB11B,PDE4B,CHD3,RABGAP1,TRIP4,ATP6V1D,AKT1,EZR,NEK7,APC,SORBS1,MAPRE1,SIRT2,CCT5,SSX2IP,DYNLL2,PRKACA,DYNLL1,PRKCZ,CTNNB1,BRSK1,VPS4A,RAP1GAP2,DHX9,KIF5B,CAMSAP2,DYNC1H1,DYNC1I2,NPM1,CALM1,CALM2,CAMK2B,COP1,SPAG9,KIF3A,DYNC1LI1,FLOT1,CDC42
		GO: Cellular Component	GO:0055038	recycling endosome membrane		0.007425	1	0.02735	0.1962	6	45	ZDHHC2,RAB11B,SCAMP1,SLC9A7,RAB12,PLEKHB2
		GO: Cellular Component	GO:0016600	flotillin complex		0.007555	1	0.02755	0.1977	3	11	SORBS1,CTNNB1,FLOT1
		GO: Cellular Component	GO:0031462	Cul2-RING ubiquitin ligase complex		0.007555	1	0.02755	0.1977	3	11	RNF7,RBX1,ELOB
		GO: Cellular Component	GO:0030666	endocytic vesicle membrane		0.007713	1	0.02799	0.2008	13	156	RAB11B,AP2M1,CLTC,ATP6V0E2,ATP6V0B,SNAP91,DLG4,CAMK2A,CAMK2B,GRIA3,LAMP1,LRP1,ATP6V0A2
		GO: Cellular Component	GO:0005753	mitochondrial proton-transporting ATP synthase complex		0.007884	1	0.02819	0.2023	4	21	ATP5PD,ATP5F1A,ATP5F1B,ATP5PF
		GO: Cellular Component	GO:0032839	dendrite cytoplasm		0.007884	1	0.02819	0.2023	4	21	KCNAB1,DLG4,CAMK2A,UHMK1
		GO: Cellular Component	GO:0043034	costamere		0.007884	1	0.02819	0.2023	4	21	ACTG1,SDC4,ANK2,ANK3
		GO: Cellular Component	GO:0032580	Golgi cisterna membrane		0.00835	1	0.02971	0.2132	8	75	SORT1,MOB4,ST3GAL2,NSG2,RAB21,YIPF5,BCAP31,SAR1B
		GO: Cellular Component	GO:0032437	cuticular plate		0.008527	1	0.02976	0.2136	2	4	SPTAN1,SPTBN1
		GO: Cellular Component	GO:0030905	retromer, tubulation complex		0.008527	1	0.02976	0.2136	2	4	SNX2,SNX5
		GO: Cellular Component	GO:0044316	cone cell pedicle		0.008527	1	0.02976	0.2136	2	4	PCLO,RAPGEF4
		GO: Cellular Component	GO:0005853	eukaryotic translation elongation factor 1 complex		0.008527	1	0.02976	0.2136	2	4	EEF1A1,EEF1A2
		GO: Cellular Component	GO:0030662	coated vesicle membrane		0.009211	1	0.032	0.2296	12	142	AP2M1,CLTC,HSPA8,DNAJC5,GAD1,MYO6,SNAP91,SYT1,NRGN,HIP1R,VTI1A,SAR1B
		GO: Cellular Component	GO:0031965	nuclear membrane		0.009391	1	0.03247	0.233	20	290	SORT1,HACD3,EI24,APC,NSMF,WDFY3,SNCA,TOR1AIP1,NOS1AP,DPY19L3,MYO6,RAP1GAP2,ERBIN,DHCR7,PLCB1,DPY19L1,SYNE1,PUM2,CAV2,NUTF2
		GO: Cellular Component	GO:0098797	plasma membrane protein complex		0.009468	1	0.03258	0.2338	32	532	PDE4B,NRN1,AP2M1,LRRTM4,CLTC,SDCBP,DPP10,APC,SORBS1,ARRB1,CTNNB1,ATP1A1,ATP1A2,NOS1AP,NDUFV2,BMPR1A,GNG12,SNAP91,GLRB,KCNAB1,DLG1,SGCE,DLG4,GNB2,CACNA1A,CACNB1,CALM1,CALM2,GRB2,GRIA3,SHISA7,FLOT1
		GO: Cellular Component	GO:0034702	ion channel complex		0.009731	1	0.03306	0.2372	20	291	TTYH1,PDE4B,NRN1,LRRTM4,DPP10,PRKACA,GABRA1,NOS1AP,GABRB3,GABRG2,GLRB,KCNAB1,DLG1,DLG4,CACNA1A,CACNB1,CALM1,CALM2,GRIA3,SHISA7
		GO: Cellular Component	GO:0070852	cell body fiber		0.009787	1	0.03306	0.2372	3	12	PENK,CADM1,APC
		GO: Cellular Component	GO:0001931	uropod		0.009787	1	0.03306	0.2372	3	12	EZR,PIP5K1C,FLOT1
		GO: Cellular Component	GO:0031254	cell trailing edge		0.009787	1	0.03306	0.2372	3	12	EZR,PIP5K1C,FLOT1
		Mouse Phenotype	MP:0003635	abnormal synaptic transmission		9.661e-19	4.442e-15	4.442e-15	4.003e-14	96	751	PDE4B,MAPT,MAT2A,LAPTM4B,MBP,BACE1,PFN2,NRN1,ADCY1,MEF2C,MEF2D,FAAH,SLC12A5,UBE2A,KIDINS220,PPP1R1B,LRRTM4,AKT1,PREX1,VDAC3,VLDLR,SORBS2,APLP2,APP,YWHAZ,CYFIP2,PPM1G,CASK,RAB3GAP1,ARRB1,NAPB,VPS35,DNAJC5,CTNNB1,ATP1A2,SNCA,RIMS2,FYN,ATP2A2,ATP2B2,GABRA1,GABRB3,GABRG2,GAD1,ARHGAP32,ATP6V1C1,CLSTN3,SNPH,ARPP21,PSAP,ATRX,MYO5A,PTDSS1,CPLX1,NCAM1,DARS,NCDN,PTN,NELL2,YIPF5,SNAP91,SV2B,PTPRZ1,DHCR7,AFG…
		Mouse Phenotype	MP:0002206	abnormal CNS synaptic transmission		9.102e-17	4.185e-13	2.093e-13	1.886e-12	85	660	PDE4B,MAPT,MAT2A,LAPTM4B,MBP,BACE1,PFN2,NRN1,ADCY1,MEF2C,MEF2D,SLC12A5,UBE2A,KIDINS220,PPP1R1B,LRRTM4,AKT1,PREX1,VDAC3,VLDLR,SORBS2,APP,YWHAZ,CYFIP2,PPM1G,RAB3GAP1,ARRB1,NAPB,VPS35,CTNNB1,FYN,ATP2A2,ATP2B2,GABRA1,GABRB3,GABRG2,GAD1,ARHGAP32,ATP6V1C1,CLSTN3,PSAP,ATRX,MYO5A,PTDSS1,CPLX1,NCAM1,DARS,NCDN,PTN,NELL2,YIPF5,SNAP91,SV2B,PTPRZ1,DHCR7,ARHGEF9,PLCB1,SYN1,SYN2,KCNAB1,SYT1,DLG4,DNM1,CACNA1A,RA…
		Mouse Phenotype	MP:0002207	abnormal long term potentiation		1.949e-10	8.963e-07	2.988e-07	2.692e-06	37	231	PDE4B,MAPT,ADCY1,MEF2C,MEF2D,PPP1R1B,VDAC3,VLDLR,APP,VPS35,CTNNB1,FYN,PSAP,ATRX,NCAM1,NCDN,PTN,NELL2,PTPRZ1,ARHGEF9,KCNAB1,DLG4,RAP1A,RAP1B,KALRN,CAMK2A,CAMK2B,NTRK2,GRIA3,THRB,THY1,ICAM5,SYNGR1,TSPAN7,LRP1,SPRED1,JPH3
		Mouse Phenotype	MP:0002918	abnormal paired-pulse facilitation		5.587e-10	2.569e-06	6.422e-07	5.787e-06	19	69	MAPT,BACE1,PFN2,MEF2C,MEF2D,VDAC3,RAB3GAP1,SNPH,PTN,SNAP91,SYN1,DLG4,CACNA1A,RAP1A,RAP1B,CAMK2A,SYNGR1,SPRED1,UNC13C
		Mouse Phenotype	MP:0008415	abnormal neurite morphology		2.294e-09	1.055e-05	1.908e-06	1.72e-05	52	434	PDE4B,MAP1A,MAPT,CFL1,ACP2,MBP,BACE1,NRN1,SLC12A5,KIDINS220,QKI,PREX1,SDCBP,EVL,SORBS2,ANK3,EI24,YWHAZ,CYFIP2,CTNNB1,SNCA,GABRB3,MYH10,SNPH,PSAP,MYO5A,GAP43,SPTAN1,SPTBN1,NCAM1,ERBIN,NRP2,SEPT8,TUBA1A,MLC1,AFG3L2,DLG1,DLG4,DNM1,AGTPBP1,CACNA1A,KALRN,CAMK4,CAMK2A,NTRK2,DNM1L,TSPAN7,LRP1,DYNC1LI1,DCLK1,MAPK8IP2,CHP1
		Mouse Phenotype	MP:0008143	abnormal dendrite morphology		2.49e-09	1.145e-05	1.908e-06	1.72e-05	33	208	PDE4B,MAP1A,MAPT,ACP2,BACE1,NRN1,SLC12A5,KIDINS220,PREX1,SDCBP,SORBS2,YWHAZ,CYFIP2,CTNNB1,GABRB3,MYH10,MYO5A,NRP2,TUBA1A,AFG3L2,DLG1,DLG4,DNM1,AGTPBP1,CACNA1A,KALRN,CAMK4,CAMK2A,NTRK2,TSPAN7,LRP1,DYNC1LI1,MAPK8IP2
		Mouse Phenotype	MP:0001516	abnormal motor coordination/balance		5.028e-09	2.312e-05	3.303e-06	2.976e-05	81	851	RPL27A,MAP1A,MAPT,CFL1,ACP2,MBP,BACE1,TIMM23,PFDN5,CHN1,MEF2D,FAAH,FGFR1,QKI,PREX1,VCP,VLDLR,ANK3,ATCAY,COX6A1,EI24,GAS7,APLP2,NPC2,APP,IFIT2,ATF2,TRAK1,SIRT2,NAPB,DNAJC5,GIGYF2,CTNNB1,SNCA,ATP2A2,ATP2B2,GAA,GABRA1,GABRB3,GABRG2,GAD1,ARHGAP32,MYH10,SNPH,PSAP,MYO5A,MYO6,KIF1B,CPLX1,NCDN,NDUFS4,MLC1,PTPRZ1,GLRB,AFG3L2,VAMP1,VPS13A,GMFB,SGCE,DLG4,DNM1,ALDH5A1,DYNC1H1,AGTPBP1,CACNA1A,KALRN,CAMK4,CAMK…
		Mouse Phenotype	MP:0000877	abnormal Purkinje cell morphology		1.287e-08	5.919e-05	7.398e-06	6.667e-05	34	233	RPL27A,MAP1A,MAP2,ACP2,PFDN5,SLC12A5,SPARCL1,QKI,PREX1,ANK3,EI24,NPC2,APP,ATF2,RNF7,ATP2B2,GABRA1,MYH10,PSAP,MYO5A,NDUFS4,GLRB,AFG3L2,SGCE,DNM1,AGTPBP1,CACNA1A,CAMK4,NTRK2,DNM1L,EEF1A2,THRB,MAPK8IP2,CHP1
		Mouse Phenotype	MP:0000875	abnormal cerebellar Purkinje cell layer		1.757e-08	8.079e-05	8.976e-06	8.088e-05	36	259	RPL27A,MAP1A,MAP2,ACP2,PFDN5,SLC12A5,SPARCL1,QKI,PREX1,VLDLR,ANK3,EI24,NPC2,APP,ATF2,RNF7,ATP2B2,GABRA1,MYH10,PSAP,MYO5A,NDUFS4,GLRB,AFG3L2,SGCE,DNM1,AGTPBP1,CACNA1A,CAMK4,NTRK2,DNM1L,CIT,EEF1A2,THRB,MAPK8IP2,CHP1
		Mouse Phenotype	MP:0002063	abnormal learning/memory/conditioning		2.143e-08	9.855e-05	9.27e-06	8.353e-05	68	686	PDE4B,PDE1B,MAP2,MAPT,MBP,PENK,BACE1,PFN2,NRN1,ADCY1,SLC12A5,UBE2A,PPP1R1B,PREX1,VDAC3,VLDLR,SORBS2,MAGED1,APP,IDS,FOXJ3,YWHAZ,VPS35,CTNNB1,ATP1A1,ATP1A2,FYN,NDRG4,GABRA1,GABRB3,GABRG2,ARHGAP32,PSAP,ATRX,MYO5A,NCAM1,NCDN,TUBA1A,PTPRZ1,ARHGEF9,PLCB1,SYN1,SYN2,KCNAB1,GMFB,SGCE,DLG4,DLST,RAP1A,RAP1B,KALRN,CAMK4,CAMK2A,CAMK2B,NTRK2,RGS4,THRB,ICAM5,TSPAN7,SLC4A10,LRP1,DYNC1LI1,LRPAP1,SPRED1,UNC13C,CRB…
		Mouse Phenotype	MP:0014114	abnormal cognition		2.273e-08	0.0001045	9.27e-06	8.353e-05	68	687	PDE4B,PDE1B,MAP2,MAPT,MBP,PENK,BACE1,PFN2,NRN1,ADCY1,SLC12A5,UBE2A,PPP1R1B,PREX1,VDAC3,VLDLR,SORBS2,MAGED1,APP,IDS,FOXJ3,YWHAZ,VPS35,CTNNB1,ATP1A1,ATP1A2,FYN,NDRG4,GABRA1,GABRB3,GABRG2,ARHGAP32,PSAP,ATRX,MYO5A,NCAM1,NCDN,TUBA1A,PTPRZ1,ARHGEF9,PLCB1,SYN1,SYN2,KCNAB1,GMFB,SGCE,DLG4,DLST,RAP1A,RAP1B,KALRN,CAMK4,CAMK2A,CAMK2B,NTRK2,RGS4,THRB,ICAM5,TSPAN7,SLC4A10,LRP1,DYNC1LI1,LRPAP1,SPRED1,UNC13C,CRB…
		Mouse Phenotype	MP:0002919	enhanced paired-pulse facilitation		2.419e-08	0.0001112	9.27e-06	8.353e-05	13	39	MAPT,BACE1,MEF2C,MEF2D,RAB3GAP1,SNPH,PTN,SNAP91,SYN1,DLG4,CACNA1A,SPRED1,UNC13C
		Mouse Phenotype	MP:0001473	reduced long term potentiation		2.642e-08	0.0001215	9.343e-06	8.419e-05	26	152	MAPT,ADCY1,PPP1R1B,VDAC3,VLDLR,APP,VPS35,CTNNB1,FYN,PSAP,ATRX,NCAM1,NCDN,RAP1A,RAP1B,KALRN,CAMK2A,CAMK2B,NTRK2,THRB,THY1,SYNGR1,TSPAN7,LRP1,SPRED1,JPH3
		Mouse Phenotype	MP:0002064	seizures		6.32e-08	0.0002906	2.076e-05	0.000187	45	385	MAPT,CFL1,ACP2,MBP,CHN1,SYNPR,SLC12A5,USF2,QKI,VCP,ANK3,SCG5,ATCAY,SLC1A2,NAPB,CTNNB1,FYN,GABRA1,GABRB3,GABRG2,ARHGAP32,PSAP,MYO5A,CPLX1,NCDN,NDUFS4,NRP2,SNAP91,SV2B,PLCB1,SYN1,SYN2,SGCE,DNM1,ALDH5A1,DMTF1,CACNA1A,CAMK2A,NTRK2,TPPP,GRIA3,CIT,THRB,SYNGR1,SLC4A10
		Mouse Phenotype	MP:0001405	impaired coordination		6.914e-08	0.0003179	2.119e-05	0.000191	51	466	RPL27A,MAPT,MBP,BACE1,TIMM23,MEF2D,FGFR1,QKI,PREX1,VCP,COX6A1,EI24,GAS7,APP,TRAK1,SIRT2,DNAJC5,GIGYF2,CTNNB1,SNCA,ATP2B2,GAA,GABRA1,GABRB3,GABRG2,GAD1,ARHGAP32,MYH10,SNPH,PSAP,MYO5A,KIF1B,NCDN,NDUFS4,PTPRZ1,AFG3L2,VPS13A,SGCE,DLG4,DYNC1H1,CACNA1A,KALRN,CAMK4,CAMK2B,SYNE1,GRIA3,RGS4,EEF1A2,LRP1,MAPK8IP2,JPH3
		Mouse Phenotype	MP:0003312	abnormal locomotor coordination		1.231e-07	0.000566	3.537e-05	0.0003187	65	673	RPL27A,MAP1A,MAPT,CFL1,ACP2,MBP,BACE1,PFDN5,CHN1,MEF2C,SLC12A5,FRRS1L,FGFR1,QKI,PREX1,VLDLR,ANK3,NPEPPS,ATCAY,EI24,NEK7,APLP2,NPC2,APP,IDS,IFIT2,ATF2,TRAK1,NAPB,DNAJC5,SNCA,ATP2B2,NDRG4,GAA,GABRB3,GABRG2,GAD1,CLSTN3,MYH10,PSAP,MYO5A,MYO6,CPLX1,NDUFS4,MLC1,GLRB,AFG3L2,VAMP1,VPS13A,EMC10,DNM1,ALDH5A1,DYNC1H1,AGTPBP1,CACNA1A,CAMK4,CAMK2B,GRIA3,CIT,CYCS,LRP1,DYNC1LI1,SPRED1,MAPK8IP2,CHP1
		Mouse Phenotype	MP:0004753	abnormal miniature excitatory postsynaptic currents		2.107e-07	0.0009688	5.699e-05	0.0005135	20	106	MAPT,PFN2,NRN1,ADCY1,SLC12A5,LRRTM4,SORBS2,CYFIP2,VPS35,CLSTN3,CPLX1,SNAP91,SYN2,SYT1,DNM1,CACNA1A,KALRN,PIP5K1C,TSPAN7,MAPK8IP2
		Mouse Phenotype	MP:0003492	abnormal involuntary movement		2.788e-07	0.001282	7.121e-05	0.0006416	82	947	MAPT,ACP2,LAPTM4B,MBP,TMEM63B,BACE1,ACTG1,CHN1,ADCY1,FAAH,SLC12A5,PI4KA,FRRS1L,FGFR1,QKI,DNAJA1,PREX1,C5orf30,EVL,VLDLR,SORBS2,ANK3,ATCAY,EI24,APLP2,NPC2,APP,ATF2,YWHAZ,CYFIP2,TRAK1,RNF7,DNAJC5,CTNNB1,ATP1A2,SNCA,BRSK1,FYN,ATP2A2,ATP2B2,NDRG4,GABRA1,GABRB3,GABRG2,GAD1,ARHGAP32,CLSTN3,PSAP,MYO5A,MYO6,MYO10,KIF1B,ERBIN,NDUFS4,SNAP91,GLRB,AFG3L2,VAMP1,PLCB1,DLG4,DNM1,AGTPBP1,DMTF1,CACNA1A,YPEL3,KALR…
		Mouse Phenotype	MP:0000947	convulsive seizures		5.413e-07	0.002489	0.000131	0.00118	26	176	ACP2,MBP,CHN1,SLC12A5,QKI,VCP,ANK3,SCG5,SLC1A2,FYN,GABRA1,PSAP,MYO5A,NDUFS4,NRP2,SNAP91,PLCB1,SYN1,SYN2,SGCE,DNM1,ALDH5A1,CACNA1A,TPPP,CIT,THRB
		Mouse Phenotype	MP:0004859	abnormal synaptic plasticity		7.225e-07	0.003322	0.0001661	0.001497	15	67	ADCY1,VLDLR,VPS35,CPLX1,NRP2,SNAP91,ARHGEF9,DLG4,CAMK2A,CAMK2B,NTRK2,GRIA3,PIP5K1C,THRB,SYNGR1
		Mouse Phenotype	MP:0002912	abnormal excitatory postsynaptic potential		9.702e-07	0.004461	0.0002124	0.001914	19	106	MAPT,ADCY1,LRRTM4,VPS35,FYN,GAD1,CLSTN3,SNAP91,ARHGEF9,SYN1,SYN2,CACNA1A,RAP1A,RAP1B,CAMK2A,NTRK2,GRIA3,SPRED1,JPH3
		Mouse Phenotype	MP:0009956	abnormal cerebellar layer morphology		1.299e-06	0.005971	0.0002665	0.002401	37	320	RPL27A,MAP1A,MAP2,ACP2,PFDN5,SLC12A5,SPARCL1,QKI,PREX1,PLXNB1,VLDLR,ANK3,EI24,NPC2,APP,ATF2,RNF7,ATP2B2,GABRA1,MYH10,PSAP,MYO5A,NDUFS4,GLRB,AFG3L2,SGCE,DNM1,AGTPBP1,CACNA1A,CAMK4,NTRK2,DNM1L,CIT,EEF1A2,THRB,MAPK8IP2,CHP1
		Mouse Phenotype	MP:0004097	abnormal cerebellar cortex morphology		1.333e-06	0.006129	0.0002665	0.002401	40	360	RPL27A,MAP1A,MAP2,ACP2,PFDN5,SLC12A5,SPARCL1,FGFR1,QKI,PREX1,PLXNB1,VLDLR,ANK3,EI24,NPC2,APP,ATF2,RNF7,ATP2B2,GABRA1,GABRB3,MYH10,PSAP,MYO5A,NDUFS4,GLRB,AFG3L2,SGCE,DNM1,AGTPBP1,CACNA1A,CAMK4,NTRK2,DNM1L,CIT,EEF1A2,THRB,DCLK1,MAPK8IP2,CHP1
		Mouse Phenotype	MP:0001468	abnormal temporal memory		1.769e-06	0.008134	0.0003389	0.003054	26	187	MAP2,MAPT,NRN1,ADCY1,UBE2A,PREX1,VDAC3,VLDLR,SORBS2,APP,YWHAZ,CTNNB1,GABRB3,ATRX,PTPRZ1,SYN2,DLG4,KALRN,CAMK4,CAMK2A,CAMK2B,NTRK2,TSPAN7,LRP1,CRBN,JPH3
		Mouse Phenotype	MP:0001469	abnormal contextual conditioning behavior		2.847e-06	0.01309	0.0005237	0.004719	23	157	MAP2,MAPT,NRN1,ADCY1,UBE2A,PREX1,VDAC3,VLDLR,SORBS2,APP,CTNNB1,GABRB3,ATRX,PTPRZ1,DLG4,KALRN,CAMK4,CAMK2A,CAMK2B,NTRK2,TSPAN7,LRP1,CRBN
		Mouse Phenotype	MP:0002062	abnormal associative learning		3.503e-06	0.01611	0.0006194	0.005582	35	307	PDE4B,MAP2,MAPT,PENK,BACE1,NRN1,ADCY1,UBE2A,PPP1R1B,PREX1,VDAC3,VLDLR,SORBS2,APP,CTNNB1,FYN,GABRA1,GABRB3,ATRX,MYO5A,PTPRZ1,GMFB,DLG4,RAP1A,RAP1B,KALRN,CAMK4,CAMK2A,CAMK2B,NTRK2,RGS4,TSPAN7,LRP1,CRBN,JPH3
		Mouse Phenotype	MP:0002915	abnormal synaptic depression		4.672e-06	0.02148	0.0007957	0.00717	20	128	PDE4B,MAPT,BACE1,UBE2A,PREX1,MYO5A,NCAM1,NCDN,SV2B,ARHGEF9,SYN1,SYN2,SYT1,CAMK4,CAMK2A,CAMK2B,PCLO,GRIA3,PIP5K1C,SPRED1
		Mouse Phenotype	MP:0001393	ataxia		5.681e-06	0.02612	0.000933	0.008407	36	327	RPL27A,MAP1A,MAPT,CFL1,ACP2,MBP,PFDN5,QKI,VLDLR,ANK3,ATCAY,EI24,APLP2,NPC2,APP,IFIT2,ATF2,NAPB,DNAJC5,ATP2B2,MYH10,PSAP,MYO5A,CPLX1,NDUFS4,MLC1,DNM1,ALDH5A1,AGTPBP1,CACNA1A,CAMK4,CAMK2B,GRIA3,CIT,MAPK8IP2,CHP1
		Mouse Phenotype	MP:0009538	abnormal synapse morphology		6.276e-06	0.02886	0.000995	0.008966	26	200	GPHN,MAPT,PFN2,NRN1,SLC12A5,GAS7,APLP2,APP,NAPB,DNAJC5,RIMS2,GABRA1,GABRG2,KIF1B,SNAP91,AFG3L2,SYN2,DNM1,CACNA1A,KALRN,CAMK2A,SYNE1,NTRK2,PCLO,EEF1A2,LRP1
		Mouse Phenotype	MP:0008540	abnormal cerebral hemisphere morphology		6.999e-06	0.03218	0.001073	0.009666	57	632	MAP2,MAPT,CFL1,MBP,BACE1,CHN1,ADCY1,MKL2,CADM1,LRRTM4,FGFR1,PLXNB1,VLDLR,ANK3,EI24,APP,SLC1A2,YWHAE,YWHAZ,ARHGAP5,NCOR2,WDFY3,CTNNB1,SNCA,BRSK1,FYN,ATP2B2,GABRB3,GAD1,CLSTN3,MYH10,PSAP,ATRX,GAP43,KIF1B,NCAM1,NCDN,NRP2,TUBA1A,MLC1,DHCR7,PLCB1,SYN1,DLG4,RAC1,AGTPBP1,KRAS,KALRN,NTRK2,VTI1A,CIT,RGS4,KIF3A,CYCS,TSPAN7,LRP1,DCLK1
		Mouse Phenotype	MP:0000849	abnormal cerebellum morphology		8.189e-06	0.03765	0.001179	0.01062	45	458	RPL27A,MAP1A,MAP2,ACP2,MBP,PFDN5,SLC12A5,SPARCL1,FGFR1,QKI,PREX1,PLXNB1,VLDLR,ANK3,EI24,NPC2,APP,ATF2,RNF7,CTNNB1,ATP2B2,GABRA1,GABRB3,MYH10,PSAP,MYO5A,NCAM1,NDUFS4,MLC1,GLRB,AFG3L2,SGCE,DNM1,AGTPBP1,CACNA1A,CAMK4,NTRK2,DNM1L,CIT,EEF1A2,THRB,DCLK1,EPB41L2,MAPK8IP2,CHP1
		Mouse Phenotype	MP:0000813	abnormal hippocampus layer morphology		8.208e-06	0.03774	0.001179	0.01062	18	111	MAP2,MAPT,MKL2,EI24,SLC1A2,YWHAE,YWHAZ,FYN,CLSTN3,PSAP,ATRX,NCAM1,TUBA1A,SYN1,DLG4,RAC1,KALRN,DCLK1
		Mouse Phenotype	MP:0001463	abnormal spatial learning		8.639e-06	0.03972	0.001179	0.01062	29	241	PDE1B,MAPT,MBP,BACE1,NRN1,ADCY1,SLC12A5,UBE2A,PREX1,APP,VPS35,CTNNB1,ATP1A2,FYN,NDRG4,NCAM1,NCDN,PTPRZ1,ARHGEF9,PLCB1,KCNAB1,DLG4,DLST,CAMK2A,NTRK2,THRB,TSPAN7,LRPAP1,SPRED1
		Mouse Phenotype	MP:0001399	hyperactivity		8.956e-06	0.04118	0.001179	0.01062	46	474	PDE1B,MAPT,TMEM63B,BACE1,CHN1,FASN,FRRS1L,PPP1R1B,AKT1,VLDLR,ZBTB4,APP,IFIT2,SLC1A2,ATF2,YWHAZ,CYFIP2,SIRT2,SNCA,NDRG4,GABRA1,GABRB3,GABRG2,PSAP,MYO5A,MYO6,KIF1B,ADGRB2,GDI2,NCDN,SNAP91,TUBA1A,PLCB1,EMC10,KALRN,CAMK2A,NTRK2,GRK6,TPPP,RGS4,GSTM5,AKTIP,THRB,EIF4G2,LRP1,NUTF2
		Mouse Phenotype	MP:0001961	abnormal reflex		8.974e-06	0.04126	0.001179	0.01062	66	776	MAPT,LAPTM4B,MBP,TMEM63B,BACE1,ACTG1,CHN1,ADCY1,FAAH,SLC12A5,PI4KA,FRRS1L,FGFR1,DNAJA1,PREX1,C5orf30,EVL,SORBS2,ATCAY,EI24,APLP2,APP,YWHAZ,CYFIP2,RNF7,DNAJC5,ATP1A2,SNCA,BRSK1,FYN,ATP2A2,ATP2B2,NDRG4,GABRA1,GABRB3,GABRG2,GAD1,ARHGAP32,PSAP,MYO5A,MYO6,MYO10,KIF1B,ERBIN,NDUFS4,SNAP91,GLRB,AFG3L2,VAMP1,PLCB1,DLG4,DMTF1,CACNA1A,YPEL3,KALRN,CAMK4,NTRK2,DNM1L,GRIA3,VTI1A,PIP5K1C,FSTL1,PSIP1,LRP1,CRBN,J…
		Mouse Phenotype	MP:0008284	abnormal hippocampus pyramidal cell layer		2.194e-05	0.1009	0.002803	0.02525	15	87	MAPT,MKL2,EI24,SLC1A2,YWHAE,YWHAZ,FYN,CLSTN3,ATRX,NCAM1,TUBA1A,SYN1,DLG4,RAC1,KALRN
		Mouse Phenotype	MP:0000847	abnormal metencephalon morphology		2.468e-05	0.1135	0.003067	0.02763	46	493	RPL27A,MAP1A,MAP2,ACP2,MBP,PFDN5,SLC12A5,SPARCL1,FGFR1,QKI,PREX1,PLXNB1,VLDLR,ANK3,EI24,NPC2,APP,ATF2,RNF7,CTNNB1,ATP2B2,GABRA1,GABRB3,MYH10,PSAP,MYO5A,NCAM1,NDUFS4,MLC1,GLRB,AFG3L2,GMFB,SGCE,DNM1,AGTPBP1,CACNA1A,CAMK4,NTRK2,DNM1L,CIT,EEF1A2,THRB,DCLK1,EPB41L2,MAPK8IP2,CHP1
		Mouse Phenotype	MP:0002067	abnormal sensory capabilities/reflexes/nociception		2.613e-05	0.1201	0.003161	0.02849	75	947	GPHN,MAPT,LAPTM4B,MBP,PENK,TMEM63B,BACE1,ACTG1,CHN1,ADCY1,FAAH,SLC12A5,PI4KA,FRRS1L,FGFR1,DNAJA1,PREX1,C5orf30,EVL,SORBS2,NPEPPS,ATCAY,EI24,APLP2,APP,SLC40A1,YWHAZ,CYFIP2,RNF7,DNAJC5,ATP1A2,SNCA,BRSK1,FYN,ATP2A2,ATP2B2,NDRG4,GABRA1,GABRB3,GABRG2,GAD1,ARHGAP32,PSAP,MYO5A,MYO6,MYO10,KIF1B,ERBIN,NDUFS4,SNAP91,PTPRZ1,GLRB,AFG3L2,VAMP1,PLCB1,DLG4,TAC1,DMTF1,CACNA1A,YPEL3,KALRN,CAMK4,NTRK2,PHF24,DNM1L,…
		Mouse Phenotype	MP:0002065	abnormal fear/anxiety-related behavior		2.72e-05	0.1251	0.003207	0.0289	38	379	PDE4B,MAP2,MAPT,PENK,BACE1,ADCY1,FAAH,SLC12A5,NPEPPS,APP,IDS,YWHAZ,CYFIP2,PRKCZ,CTNNB1,ATP1A1,ATP1A2,FYN,GABRA1,GABRG2,PSAP,SNAP91,TUBA1A,ARHGEF9,EMC10,DLG4,TAC1,PCSK1N,KALRN,CAMK4,CAMK2A,CAMK2B,NTRK2,TPPP,SLC4A10,DYNC1LI1,SPRED1,MAPK8IP2
		Mouse Phenotype	MP:0004166	abnormal limbic system morphology		2.801e-05	0.1288	0.00322	0.02901	40	408	MAP2,MAPT,BACE1,FAAH,MKL2,CADM1,LRRTM4,VLDLR,ANK3,EI24,SLC1A2,YWHAE,YWHAZ,CTNNB1,ATP1A2,SNCA,BRSK1,FYN,GABRB3,CLSTN3,PSAP,ATRX,KIF1B,NCAM1,NCDN,NRP2,TUBA1A,PLCB1,SYN1,DLG4,RAC1,AGTPBP1,KRAS,KALRN,NTRK2,CIT,RGS4,CYCS,TSPAN7,DCLK1
		Mouse Phenotype	MP:0010733	abnormal axon initial segment morphology		2.917e-05	0.1341	0.003271	0.02948	4	5	MAP1A,ANK3,SPTAN1,SPTBN1
		Mouse Phenotype	MP:0000801	abnormal temporal lobe morphology		3.085e-05	0.1418	0.003377	0.03043	37	367	MAP2,MAPT,BACE1,MKL2,CADM1,LRRTM4,VLDLR,ANK3,EI24,SLC1A2,YWHAE,YWHAZ,CTNNB1,SNCA,BRSK1,FYN,ATP2B2,GABRB3,CLSTN3,PSAP,ATRX,KIF1B,NCAM1,NCDN,NRP2,TUBA1A,PLCB1,SYN1,DLG4,RAC1,AGTPBP1,KRAS,KALRN,CIT,RGS4,TSPAN7,DCLK1
		Mouse Phenotype	MP:0009939	abnormal hippocampus neuron morphology		3.883e-05	0.1785	0.004075	0.03672	18	124	MAPT,BACE1,MKL2,ANK3,EI24,SLC1A2,YWHAZ,CTNNB1,FYN,GABRB3,ATRX,NRP2,TUBA1A,PLCB1,SYN1,DLG4,KALRN,TSPAN7
		Mouse Phenotype	MP:0004811	abnormal neuron physiology		3.9e-05	0.1793	0.004075	0.03672	57	670	MAPT,CFL1,MBP,MEF2C,MEF2D,MKL2,KIDINS220,FGFR1,CX3CL1,PLXNB1,VLDLR,MAGED1,EI24,GAS7,YWHAE,YWHAZ,CASK,NCOR2,RNF7,NAPB,CSNK1E,KDM2A,WDFY3,CTNNB1,SNCA,RIMS2,ATP2B2,GABRG2,GAD1,MYH10,SNPH,PSAP,GAP43,KIF1B,CPLX1,NDUFS4,NRP2,SNAP91,TUBA1A,SYN1,SYT1,DNM1,DYNC1H1,KRAS,TCF4,KALRN,NTRK2,DNM1L,VTI1A,PIP5K1C,CIT,GSTM5,THRB,G3BP1,SLC4A10,DYNC1LI1,EPAS1
		Mouse Phenotype	MP:0000807	abnormal hippocampus morphology		4.983e-05	0.2291	0.005091	0.04588	36	361	MAP2,MAPT,BACE1,MKL2,CADM1,LRRTM4,VLDLR,ANK3,EI24,SLC1A2,YWHAE,YWHAZ,CTNNB1,SNCA,BRSK1,FYN,GABRB3,CLSTN3,PSAP,ATRX,KIF1B,NCAM1,NCDN,NRP2,TUBA1A,PLCB1,SYN1,DLG4,RAC1,AGTPBP1,KRAS,KALRN,CIT,RGS4,TSPAN7,DCLK1
		Mouse Phenotype	MP:0004262	abnormal physical strength		6.95e-05	0.3196	0.006832	0.06156	44	484	MAPT,BACE1,TIMM23,NEGR1,FRRS1L,AKT1,QKI,DNAJA1,CAP2,VCP,HSP90AA1,GAS7,APLP2,APP,TRAK1,ARHGDIA,SIRT2,DNAJC5,SNCA,ATP2B2,GAA,GAD1,PSAP,DBI,NDUFA8,BMPR1A,BMPR2,MLC1,DHCR7,DLG4,DYNC1H1,AGTPBP1,CACNA1A,NSF,CAMK2B,SYNE1,EEF1A2,PSIP1,CYCS,EIF4G2,LRP1,DYNC1LI1,H3F3B,MAPK8IP2
		Mouse Phenotype	MP:0000787	abnormal telencephalon morphology		6.984e-05	0.3211	0.006832	0.06156	67	844	MAP2,MAPT,CFL1,MBP,BACE1,PFN2,CHN1,ADCY1,MKL2,CADM1,LRRTM4,FGFR1,QKI,PLXNB1,EVL,VLDLR,ANK3,EI24,APC,APP,SLC1A2,YWHAE,YWHAZ,CNBP,ARHGAP5,NCOR2,RNF7,WDFY3,CTNNB1,ATP1A2,SNCA,BRSK1,FYN,ATP2B2,GABRB3,GAD1,CLSTN3,MYH10,PSAP,ATRX,GAP43,SPTAN1,KIF1B,NCAM1,NCDN,NDUFS4,NRP2,TUBA1A,MLC1,DHCR7,VPS13A,PLCB1,SYN1,DLG4,RAC1,AGTPBP1,KRAS,KALRN,NTRK2,VTI1A,CIT,RGS4,KIF3A,CYCS,TSPAN7,LRP1,DCLK1
		Mouse Phenotype	MP:0001362	abnormal anxiety-related response		7.647e-05	0.3516	0.007325	0.06601	34	340	PDE4B,MAPT,PENK,BACE1,FAAH,SLC12A5,NPEPPS,APP,IDS,YWHAZ,CYFIP2,PRKCZ,CTNNB1,ATP1A1,ATP1A2,GABRG2,PSAP,SNAP91,TUBA1A,ARHGEF9,EMC10,DLG4,TAC1,PCSK1N,KALRN,CAMK4,CAMK2A,CAMK2B,NTRK2,TPPP,SLC4A10,DYNC1LI1,SPRED1,MAPK8IP2
		Mouse Phenotype	MP:0000841	abnormal hindbrain morphology		0.0001166	0.536	0.01094	0.09856	48	556	RPL27A,MAP1A,MAP2,MAPT,ACP2,MBP,PFDN5,SLC12A5,SPARCL1,FGFR1,QKI,PREX1,PLXNB1,VLDLR,ANK3,EI24,NPC2,APP,ATF2,CYFIP2,RNF7,CTNNB1,ATP2B2,GABRA1,GABRB3,MYH10,PSAP,MYO5A,NCAM1,NDUFS4,MLC1,GLRB,AFG3L2,GMFB,SGCE,DNM1,AGTPBP1,CACNA1A,CAMK4,NTRK2,DNM1L,CIT,EEF1A2,THRB,DCLK1,EPB41L2,MAPK8IP2,CHP1
		Mouse Phenotype	MP:0002572	abnormal emotion/affect behavior		0.0001276	0.5865	0.01167	0.1051	53	636	PDE4B,PDE1B,MAP2,MAPT,PENK,BACE1,PFN2,ADCY1,FAAH,SLC12A5,QKI,MAGED1,NPEPPS,APP,IDS,FOXJ3,YWHAZ,CYFIP2,PRKCZ,CTNNB1,ATP1A1,ATP1A2,FYN,GABRA1,GABRB3,GABRG2,ARHGAP32,EMC7,PSAP,ADGRB2,NDUFS4,SNAP91,TUBA1A,ARHGEF9,SYN1,SYN2,EMC10,DLG4,TAC1,PCSK1N,KALRN,CAMK4,CAMK2A,CAMK2B,NTRK2,TPPP,RGS4,TSPAN7,SLC4A10,DYNC1LI1,SPRED1,MAPK8IP2,JPH3
		Mouse Phenotype	MP:0002924	delayed CNS synapse formation		0.0001294	0.5951	0.01167	0.1051	3	3	NRN1,SYN1,SYN2
		Mouse Phenotype	MP:0000745	tremors		0.0001326	0.6098	0.01173	0.1057	31	307	MAPT,ACP2,MBP,QKI,VLDLR,ANK3,EI24,NPC2,ATF2,TRAK1,CTNNB1,ATP2B2,GABRA1,GABRB3,GABRG2,CLSTN3,PSAP,NDUFS4,GLRB,AFG3L2,DNM1,AGTPBP1,CACNA1A,CAMK4,GRIA3,CIT,EEF1A2,THRB,ABCA5,LRP1,CHP1
		Mouse Phenotype	MP:0002910	abnormal excitatory postsynaptic currents		0.000146	0.6711	0.01266	0.1141	18	137	PFN2,ADCY1,RAB3GAP1,NAPB,GABRB3,CPLX1,SNAP91,PLCB1,SYT1,DNM1,CACNA1A,KALRN,CAMK4,CAMK2A,PCLO,THRB,FSTL1,MAPK8IP2
		Mouse Phenotype	MP:0000878	abnormal Purkinje cell number		0.0001644	0.7558	0.014	0.1261	13	81	PFDN5,ANK3,EI24,NPC2,ATF2,ATP2B2,GABRA1,PSAP,AGTPBP1,CACNA1A,CAMK4,DNM1L,THRB
		Mouse Phenotype	MP:0005445	abnormal neurotransmitter secretion		0.0001867	0.8583	0.0156	0.1406	13	82	CASK,RAB3GAP1,SNCA,CPLX1,SYN1,SYT1,DLG4,CACNA1A,RAP1A,RAP1B,PCLO,EEF1A2,MAPK8IP2
		Mouse Phenotype	MP:0009454	impaired contextual conditioning behavior		0.0002022	0.9296	0.01654	0.149	12	72	MAPT,NRN1,UBE2A,SORBS2,CTNNB1,ATRX,CAMK4,CAMK2A,CAMK2B,TSPAN7,LRP1,CRBN
		Mouse Phenotype	MP:0000859	abnormal somatosensory cortex morphology		0.0002051	0.9428	0.01654	0.149	8	34	MAPT,ADCY1,WDFY3,FYN,GAP43,TUBA1A,RAC1,NTRK2
		Mouse Phenotype	MP:0008572	abnormal Purkinje cell dendrite morphology		0.0002313	1	0.01802	0.1624	12	73	MAP1A,ACP2,PREX1,MYH10,MYO5A,AFG3L2,DNM1,AGTPBP1,CACNA1A,CAMK4,NTRK2,MAPK8IP2
		Mouse Phenotype	MP:0009357	abnormal seizure response to inducing agent		0.000233	1	0.01802	0.1624	22	193	MAPT,MBP,SLC12A5,SLC1A2,CTNNB1,FYN,GABRA1,GABRB3,GABRG2,ARHGAP32,NDUFS4,NRP2,PLCB1,SYN1,SYN2,DNM1,CACNA1A,NTRK2,GRIA3,CIT,THRB,SLC4A10
		Mouse Phenotype	MP:0001513	limb grasping		0.0002384	1	0.01802	0.1624	26	247	MAPT,MBP,TMEM63B,ACTG1,FRRS1L,PREX1,EI24,DNAJC5,ATP2B2,NDRG4,GABRB3,GABRG2,GAD1,ARHGAP32,PSAP,NDUFS4,SNAP91,GLRB,AFG3L2,DMTF1,CACNA1A,CAMK4,VTI1A,PSIP1,LRP1,JPH3
		Mouse Phenotype	MP:0012315	impaired learning		0.0002391	1	0.01802	0.1624	13	84	BACE1,ADCY1,SLC12A5,UBE2A,PREX1,APP,GABRA1,ARHGAP32,SYN1,KALRN,CAMK2A,THRB,TSPAN7
		Mouse Phenotype	MP:0001364	decreased anxiety-related response		0.0002636	1	0.01955	0.1761	19	156	PDE4B,MAPT,BACE1,FAAH,YWHAZ,PRKCZ,PSAP,SNAP91,TUBA1A,DLG4,TAC1,PCSK1N,KALRN,CAMK4,CAMK2A,CAMK2B,TPPP,SLC4A10,MAPK8IP2
		Mouse Phenotype	MP:0001900	impaired synaptic plasticity		0.0003101	1	0.02202	0.1984	9	45	ADCY1,VLDLR,VPS35,CPLX1,CAMK2A,NTRK2,PIP5K1C,THRB,SYNGR1
		Mouse Phenotype	MP:0000890	thin cerebellar molecular layer		0.000313	1	0.02202	0.1984	8	36	MAP1A,ANK3,EI24,ATP2B2,AFG3L2,CACNA1A,THRB,MAPK8IP2
		Mouse Phenotype	MP:0005112	abnormal spinal cord ventral horn morphology		0.0003144	1	0.02202	0.1984	6	20	SNCA,RIMS2,KIF1B,GLRB,DYNC1H1,EEF1A2
		Mouse Phenotype	MP:0000937	abnormal motor neuron morphology		0.0003161	1	0.02202	0.1984	21	184	GPHN,MAPT,PFN2,CHN1,FAAH,SORT1,KIDINS220,FGFR1,VCP,ATCAY,GAS7,SLC1A2,GIGYF2,CTNNB1,RIMS2,BMPR2,AFG3L2,KIF5C,DYNC1H1,NTRK2,EEF1A2
		Mouse Phenotype	MP:0009745	abnormal behavioral response to xenobiotic		0.000324	1	0.02224	0.2004	29	294	MAPT,MBP,PENK,BACE1,FAAH,SLC12A5,PPP1R1B,SLC1A2,CYFIP2,CTNNB1,ATP1A1,FYN,GABRA1,GABRB3,GABRG2,ARHGAP32,NCDN,NRP2,PLCB1,DLG4,CACNA1A,CAMK4,NTRK2,GRK6,GRIA3,CIT,RGS4,GSTM5,SLC4A10
		Mouse Phenotype	MP:0008026	abnormal brain white matter morphology		0.0003376	1	0.02283	0.2057	24	225	MAP2,MBP,MKL2,FGFR1,QKI,PLXNB1,EVL,ATCAY,EI24,APP,ARHGAP5,CTNNB1,FYN,PSAP,KIF1B,NRP2,MLC1,DHCR7,AFG3L2,RAC1,DNM1L,VTI1A,KIF3A,DCLK1
		Mouse Phenotype	MP:0001436	abnormal suckling behavior		0.0003782	1	0.0252	0.2271	16	123	GPHN,PHF21A,PPME1,CASK,UBR3,CTNNB1,FYN,GAD1,MYH10,ATRX,BMPR1A,DHCR7,SYT1,DNM1,DYNC1H1,NTRK2
		Mouse Phenotype	MP:0002862	altered righting response		0.0003868	1	0.02533	0.2282	18	148	BACE1,CHN1,FAAH,ATCAY,APLP2,APP,DNAJC5,ATP2A2,ATP2B2,GABRB3,GABRG2,MYO5A,NDUFS4,GLRB,AFG3L2,VAMP1,CACNA1A,NTRK2
		Mouse Phenotype	MP:0013292	embryonic lethality prior to organogenesis		0.0003911	1	0.02533	0.2282	57	730	TTYH1,TPT1,HSP90B1,ABCF1,ACACA,CFL1,TIMM23,SKA2,RPS19,FASN,AP2M1,UBE2I,ATP6V1D,DDX54,PKNOX1,PITPNB,HSBP1,FGFR1,QKI,SDHA,VCP,SRSF3,APC,DRAP1,SLC40A1,ARF1,PPP2CA,IPO9,PRKACA,UBR3,CTNNB1,ATP2A2,SNX2,ATP5F1B,ATP6V1C1,ZEB2,DDOST,NCDN,B3GAT3,NDUFV2,DHX9,BMPR1A,BMPR2,DLD,NMT1,RAB6A,DYNC1H1,RAC1,NSF,AGGF1,GRB2,UBE2M,RGS4,SUDS3,EIF4G2,RPA1,ENO1
		Mouse Phenotype	MP:0000746	weakness		0.000404	1	0.0258	0.2324	17	136	MAPT,AKT1,QKI,APLP2,APP,TRAK1,ARHGDIA,SNCA,PSAP,DBI,DHCR7,AGTPBP1,CACNA1A,SYNE1,EEF1A2,CYCS,LRP1
		Mouse Phenotype	MP:0005404	abnormal axon morphology		0.0004285	1	0.02672	0.2408	23	215	MAP1A,MAPT,MBP,BACE1,KIDINS220,QKI,ANK3,EI24,SNCA,SNPH,PSAP,GAP43,SPTAN1,SPTBN1,NCAM1,ERBIN,SEPT8,MLC1,AFG3L2,CACNA1A,NTRK2,DCLK1,CHP1
		Mouse Phenotype	MP:0002826	tonic seizures		0.0004347	1	0.02672	0.2408	7	29	MBP,CHN1,QKI,FYN,PSAP,DNM1,ALDH5A1
		Mouse Phenotype	MP:0000880	decreased Purkinje cell number		0.0004359	1	0.02672	0.2408	12	78	PFDN5,ANK3,EI24,NPC2,ATF2,GABRA1,PSAP,AGTPBP1,CACNA1A,CAMK4,DNM1L,THRB
		Mouse Phenotype	MP:0001489	decreased startle reflex		0.0004544	1	0.02749	0.2477	16	125	MBP,C5orf30,EVL,SORBS2,YWHAZ,CYFIP2,DNAJC5,ATP2B2,MYO6,NDUFS4,PLCB1,DLG4,KALRN,GRIA3,PIP5K1C,CRBN
		Mouse Phenotype	MP:0008503	abnormal spinal cord grey matter morphology		0.000467	1	0.02787	0.2512	24	230	GPHN,MAPT,PFN2,CHN1,FAAH,SORT1,KIDINS220,FGFR1,VCP,ATCAY,GAS7,SLC1A2,GIGYF2,CTNNB1,SNCA,RIMS2,KIF1B,BMPR2,GLRB,AFG3L2,KIF5C,DYNC1H1,NTRK2,EEF1A2
		Mouse Phenotype	MP:0009388	abnormal epidermal melanocyte morphology		0.0004728	1	0.02787	0.2512	3	4	RPL27A,MYO5A,ECE1
		Mouse Phenotype	MP:0008428	abnormal spatial working memory		0.0004913	1	0.02824	0.2544	12	79	PDE4B,MAPT,APP,IDS,YWHAZ,TUBA1A,PTPRZ1,DLG4,KALRN,NTRK2,TSPAN7,SPRED1
		Mouse Phenotype	MP:0009746	enhanced behavioral response to xenobiotic		0.0004913	1	0.02824	0.2544	12	79	BACE1,PPP1R1B,CYFIP2,ATP1A1,FYN,GABRG2,NCDN,DLG4,CACNA1A,CAMK4,NTRK2,GRK6
		Mouse Phenotype	MP:0013293	embryonic lethality prior to tooth bud stage		0.0005687	1	0.03229	0.2909	61	807	TTYH1,TPT1,HSP90B1,ABCF1,ACACA,CFL1,TIMM23,ACTG1,SKA2,RPS19,FASN,AP2M1,UBE2I,ATP6V1D,DDX54,PKNOX1,PITPNB,HSBP1,FGFR1,QKI,SDHA,VCP,SRSF3,APC,DRAP1,SLC40A1,ARF1,PPP2CA,IPO9,PRKACA,UBR3,CTNNB1,ATP2A2,SNX2,ATP5F1B,ATP6V1C1,ZEB2,DDOST,NCDN,B3GAT3,NDUFV2,DHX9,BMPR1A,YIPF5,BMPR2,DLD,NMT1,RAB6A,DYNC1H1,RAC1,NSF,AGGF1,GRB2,UBE2M,RGS4,SUDS3,EIF4G2,LRP1,RPA1,ENO1,PCCB
		Mouse Phenotype	MP:0000876	Purkinje cell degeneration		0.00062	1	0.03477	0.3133	12	81	MAP1A,QKI,ANK3,NPC2,APP,PSAP,NDUFS4,AFG3L2,AGTPBP1,CACNA1A,EEF1A2,CHP1
		Mouse Phenotype	MP:0000794	abnormal parietal lobe morphology		0.0006678	1	0.03699	0.3333	8	40	MAPT,ADCY1,WDFY3,FYN,GAP43,TUBA1A,RAC1,NTRK2
		Mouse Phenotype	MP:0005058	abnormal lysosome morphology		0.0007028	1	0.03847	0.3467	9	50	ACP2,SORT1,NPC2,VPS35,SNCA,GAA,LGMN,KIF5B,LAMP1
		Mouse Phenotype	MP:0002980	abnormal postural reflex		0.0007893	1	0.0427	0.3847	18	157	BACE1,CHN1,FAAH,ATCAY,APLP2,APP,DNAJC5,ATP2A2,ATP2B2,GABRB3,GABRG2,MYO5A,NDUFS4,GLRB,AFG3L2,VAMP1,CACNA1A,NTRK2
		Mouse Phenotype	MP:0003329	amyloid beta deposits		0.0008166	1	0.04366	0.3934	9	51	MAPT,BACE1,APP,VPS35,PSAP,DLST,LRP1,LRPAP1,FLOT1
		Mouse Phenotype	MP:0002272	abnormal nervous system electrophysiology		0.0008717	1	0.04607	0.4151	31	342	GPHN,MBP,CHN1,SLC12A5,FGFR1,ANK3,COX6A1,SLC1A1,SLC1A2,SIRT2,ATP1A2,ATP2B2,GABRG2,GAD1,MYO6,ERBIN,SEPT8,SNAP91,AFG3L2,SYN1,SYN2,KCNAB1,DNM1,ALDH5A1,CACNA1A,KALRN,THRB,FSTL1,TSPAN7,DYNC1LI1,JPH3
		Mouse Phenotype	MP:0003008	enhanced long term potentiation		0.0008862	1	0.04631	0.4172	10	62	PDE4B,PTN,NELL2,PTPRZ1,ARHGEF9,KCNAB1,DLG4,CAMK2A,GRIA3,ICAM5
		Mouse Phenotype	MP:0000852	small cerebellum		0.0009164	1	0.04734	0.4266	18	159	RPL27A,ACP2,PFDN5,VLDLR,ANK3,APP,RNF7,CTNNB1,ATP2B2,MYH10,PSAP,AGTPBP1,CACNA1A,DNM1L,CIT,THRB,DCLK1,EPB41L2
		Mouse Phenotype	MP:0004792	abnormal synaptic vesicle number		0.0009449	1	0.04827	0.435	9	52	PFN2,NAPB,RIMS2,KIF1B,SNAP91,SYN2,DNM1,CAMK2A,PCLO
		Mouse Phenotype	MP:0004062	dilated heart right atrium		0.001002	1	0.05063	0.4562	4	10	SPEG,GRK2,CAP2,MYH10
		Mouse Phenotype	MP:0012317	impaired conditioning behavior		0.001037	1	0.0518	0.4668	15	122	PDE4B,MAPT,NRN1,UBE2A,PPP1R1B,SORBS2,CTNNB1,ATRX,CAMK4,CAMK2A,CAMK2B,RGS4,TSPAN7,LRP1,CRBN
		Mouse Phenotype	MP:0014062	nervous system inclusion bodies		0.001128	1	0.05529	0.4982	11	75	MAPT,BACE1,APP,VPS35,GIGYF2,SNCA,PSAP,DLST,LRP1,LRPAP1,FLOT1
		Mouse Phenotype	MP:0008278	failure of sternum ossification		0.001138	1	0.05529	0.4982	3	5	MEF2C,MEF2D,NSD2
		Mouse Phenotype	MP:0003461	abnormal response to novel object		0.001142	1	0.05529	0.4982	10	64	BACE1,PFN2,QKI,YWHAZ,GABRB3,SNAP91,TUBA1A,NTRK2,TSPAN7,SLC4A10
		Mouse Phenotype	MP:0009754	enhanced behavioral response to cocaine		0.001162	1	0.05565	0.5015	6	25	PPP1R1B,CYFIP2,DLG4,CAMK4,NTRK2,GRK6
		Mouse Phenotype	MP:0002945	abnormal inhibitory postsynaptic currents		0.001187	1	0.05626	0.507	12	87	GABRA1,GABRG2,GAD1,CPLX1,SNAP91,ARHGEF9,SYN1,SYT1,DNM1,CACNA1A,CAMK4,PIP5K1C
		Mouse Phenotype	MP:0003088	abnormal prepulse inhibition		0.00122	1	0.05638	0.508	20	190	MAT2A,LAPTM4B,BACE1,AKT1,SORBS2,YWHAZ,CYFIP2,PPM1G,ARRB1,CTNNB1,ATP2A2,ATP2B2,ATP6V1C1,PTDSS1,DARS,NCDN,YIPF5,PLCB1,KALRN,NTRK2
		Mouse Phenotype	MP:0001504	abnormal posture		0.001224	1	0.05638	0.508	26	275	GPHN,SLC12A5,PI4KA,FRRS1L,FGFR1,APC,CHORDC1,TRAK1,CASK,DNAJC5,CTNNB1,SNCA,ATP2B2,GABRA1,GABRG2,MYO5A,NDUFS4,GLRB,VAMP1,DNM1,DYNC1H1,KRAS,CACNA1A,CACNB1,PSIP1,LRP1
		Mouse Phenotype	MP:0006009	abnormal neuronal migration		0.001247	1	0.05638	0.508	16	137	MKL2,FGFR1,VLDLR,YWHAE,YWHAZ,RNF7,WDFY3,CTNNB1,GAD1,MYH10,NRP2,TUBA1A,TCF4,NTRK2,PIP5K1C,DYNC1LI1
		Mouse Phenotype	MP:0004056	abnormal myocardium compact layer morphology		0.001261	1	0.05638	0.508	11	76	GRK2,FKBP1A,EVL,YWHAE,NFAT5,ATP2A2,MYH10,SPTAN1,SPTBN1,BMPR2,CALR
		Mouse Phenotype	MP:0003871	abnormal myelin sheath morphology		0.001261	1	0.05638	0.508	11	76	MBP,BACE1,QKI,EI24,PSAP,NCAM1,ERBIN,SEPT8,MLC1,AFG3L2,NTRK2
		Mouse Phenotype	MP:0002106	abnormal muscle physiology		0.001265	1	0.05638	0.508	69	969	SPEG,BACE1,ACTG1,CHN1,MEF2C,MEF2D,FAAH,SORT1,GRK2,FGFR1,FKBP1A,CAP2,VCP,VDAC3,GLRX3,ATCAY,GAS7,APP,FOXJ3,YWHAE,TRAK1,ARRB1,DNAJC5,SMS,ATP1A1,ATP1A2,NFAT5,ATP2A2,ATP2B1,YME1L1,GAA,GABRA1,ARHGAP42,MYH10,PSAP,MYO5A,MYO6,ARHGAP26,SPTBN1,KIF1B,NACA,NDUFS4,NRP2,BMPR1A,BMPR2,DHCR7,GLRB,AFG3L2,DLG1,SGCE,ALDH5A1,DYNC1H1,KRAS,CACNA1A,CACNB1,CALR,SYNE1,DNM1L,CAV2,ECE1,CIT,OXCT1,THRB,FSTL1,ABCA5,ATP6AP2,LRP1…
		Mouse Phenotype	MP:0000955	abnormal spinal cord morphology		0.001275	1	0.05638	0.508	30	335	GPHN,PDE4B,MAPT,PFN2,CHN1,FAAH,SORT1,KIDINS220,FGFR1,VCP,ATCAY,GAS7,SLC1A2,GIGYF2,CTNNB1,SNCA,RIMS2,MYH10,PSAP,KIF1B,NRP2,BMPR2,GLRB,AFG3L2,KIF5C,DYNC1H1,NTRK2,PIP5K1C,KIF3A,EEF1A2
		Mouse Phenotype	MP:0009142	decreased prepulse inhibition		0.001348	1	0.05847	0.5269	16	138	MAT2A,LAPTM4B,BACE1,AKT1,SORBS2,YWHAZ,PPM1G,ARRB1,CTNNB1,ATP2A2,ATP6V1C1,DARS,NCDN,PLCB1,KALRN,NTRK2
		Mouse Phenotype	MP:0002231	abnormal primitive streak morphology		0.001348	1	0.05847	0.5269	16	138	TPT1,HSP90B1,CFL1,PKNOX1,FGFR1,MAP4K4,APC,DRAP1,PRKAR1A,DYNLL1,CTNNB1,DHX9,BMPR1A,BMPR2,RAC1,KIF3A
		Mouse Phenotype	MP:0011100	preweaning lethality, complete penetrance		0.001406	1	0.06044	0.5446	59	803	LZTR1,MAT2A,CFL1,SPEG,TMEM63B,SKA2,NDRG3,RPL7L1,ATP6V1D,DDX54,PKNOX1,FGFR1,SPOP,SDHA,VCP,SEL1L,EZR,PGS1,SRSF7,NEK7,APC,FOXJ3,SLC40A1,DENR,CYFIP2,CNBP,DYNLL1,CTNNB1,EIF3H,ATP1A1,FYN,ATP2A2,ATP5F1B,MYH10,VPS4A,KIF1B,NDUFA8,GDI2,NDUFB8,DDOST,ATXN7L3,BMPR1A,YIPF5,GLRB,TMEM132A,KIF5B,CACNA1A,NSF,DNM1L,UBE2M,PIP5K1C,THRB,EIF4G2,LRP1,PAK2,NUTF2,RPA1,PCCB,EPAS1
		Mouse Phenotype	MP:0008226	decreased anterior commissure size		0.001495	1	0.06307	0.5683	5	18	MAP2,APP,ARHGAP5,RAC1,DCLK1
		Mouse Phenotype	MP:0008279	arrest of spermiogenesis		0.001495	1	0.06307	0.5683	5	18	MAP2,CADM1,FADS2,CHD5,H3F3B
		Mouse Phenotype	MP:0006205	embryonic lethality between implantation and somite formation		0.001686	1	0.07048	0.6351	27	296	TPT1,HSP90B1,ACACA,UBE2I,PKNOX1,PITPNB,FGFR1,APC,DRAP1,SLC40A1,ARF1,PPP2CA,IPO9,CTNNB1,NCDN,NDUFV2,DHX9,BMPR1A,BMPR2,DLD,NMT1,RAB6A,DYNC1H1,RAC1,GRB2,SUDS3,ENO1
		Mouse Phenotype	MP:0002920	decreased paired-pulse facilitation		0.001785	1	0.07392	0.6661	6	27	PFN2,VDAC3,RAP1A,RAP1B,CAMK2A,SYNGR1
		Mouse Phenotype	MP:0009546	absent gastric milk in neonates		0.001804	1	0.07405	0.6672	14	116	USF2,APLP2,APP,GAD1,ATRX,DHCR7,DLG1,DNM1,DMTF1,SYNE1,GRB2,DNM1L,PIP5K1C,PSIP1
		Mouse Phenotype	MP:0005402	abnormal action potential		0.001831	1	0.07405	0.6672	15	129	MBP,SLC12A5,FGFR1,ANK3,SIRT2,ATP1A2,ATP2B2,MYO6,KCNAB1,CACNA1A,KALRN,THRB,FSTL1,TSPAN7,DYNC1LI1
		Mouse Phenotype	MP:0009940	abnormal hippocampus pyramidal cell morphology		0.001836	1	0.07405	0.6672	10	68	MAPT,EI24,SLC1A2,YWHAZ,FYN,ATRX,TUBA1A,SYN1,DLG4,KALRN
		Mouse Phenotype	MP:0002916	increased synaptic depression		0.001947	1	0.07784	0.7014	5	19	SYN1,SYN2,SYT1,PCLO,PIP5K1C
		Mouse Phenotype	MP:0001523	impaired righting response		0.001978	1	0.07841	0.7065	15	130	CHN1,ATCAY,APLP2,APP,DNAJC5,ATP2A2,ATP2B2,GABRG2,MYO5A,NDUFS4,GLRB,AFG3L2,VAMP1,CACNA1A,NTRK2
		Mouse Phenotype	MP:0000938	motor neuron degeneration		0.002012	1	0.07849	0.7072	8	47	GPHN,MAPT,FAAH,VCP,ATCAY,GIGYF2,DYNC1H1,EEF1A2
		Mouse Phenotype	MP:0000748	progressive muscle weakness		0.002031	1	0.07849	0.7072	7	37	VCP,GAS7,DNAJC5,GAA,PSAP,KIF1B,AFG3L2
		Mouse Phenotype	MP:0002801	abnormal long term object recognition memory		0.002031	1	0.07849	0.7072	7	37	MAPT,SORBS2,APP,YWHAZ,CTNNB1,CAMK2A,JPH3
		Mouse Phenotype	MP:0010346	increased thyroid carcinoma incidence		0.002181	1	0.08258	0.7441	4	12	PRKAR1A,SPTBN1,KRAS,THRB
		Mouse Phenotype	MP:0001400	hyperresponsive		0.002191	1	0.08258	0.7441	3	6	GPHN,GABRA1,GABRB3
		Mouse Phenotype	MP:0003908	decreased stereotypic behavior		0.002191	1	0.08258	0.7441	3	6	SGCE,DLG4,PCSK1N
		Mouse Phenotype	MP:0009358	environmentally induced seizures		0.002312	1	0.08585	0.7736	8	48	MBP,FYN,NDUFS4,NRP2,SYN1,SYN2,CACNA1A,THRB
		Mouse Phenotype	MP:0001898	abnormal long term depression		0.002334	1	0.08585	0.7736	12	94	BACE1,UBE2A,PREX1,MYO5A,NCAM1,NCDN,ARHGEF9,CAMK4,CAMK2A,CAMK2B,GRIA3,SPRED1
		Mouse Phenotype	MP:0010053	decreased grip strength		0.002343	1	0.08585	0.7736	25	273	BACE1,TIMM23,NEGR1,FRRS1L,DNAJA1,CAP2,VCP,GAS7,APP,SIRT2,DNAJC5,ATP2B2,GAA,GAD1,BMPR1A,BMPR2,MLC1,DLG4,DYNC1H1,CACNA1A,NSF,CAMK2B,PSIP1,EIF4G2,MAPK8IP2
		Mouse Phenotype	MP:0001458	abnormal object recognition memory		0.002358	1	0.08585	0.7736	11	82	PDE4B,MAPT,SORBS2,APP,YWHAZ,CTNNB1,SYN2,CAMK2A,CAMK2B,RGS4,JPH3
		Mouse Phenotype	MP:0004769	abnormal synaptic vesicle morphology		0.002371	1	0.08585	0.7736	9	59	PFN2,NAPB,RIMS2,KIF1B,SNAP91,SYN2,DNM1,CAMK2A,PCLO
		Mouse Phenotype	MP:0001524	impaired limb coordination		0.002553	1	0.0917	0.8263	10	71	ATF2,ATP2B2,PSAP,MYO5A,VAMP1,DNM1,DYNC1H1,CACNA1A,CYCS,LRP1
		Mouse Phenotype	MP:0001406	abnormal gait		0.002821	1	0.1003	0.9038	35	431	MBP,BACE1,CHN1,MEF2C,SLC12A5,FRRS1L,FGFR1,QKI,PREX1,VLDLR,ANK3,NPEPPS,ATCAY,NEK7,IDS,TRAK1,SNCA,ATP2B2,NDRG4,GAA,GABRG2,GAD1,CLSTN3,PSAP,MYO5A,NDUFS4,GLRB,AFG3L2,VPS13A,EMC10,DNM1,CACNA1A,CIT,LRP1,DYNC1LI1
		Mouse Phenotype	MP:0000743	muscle spasm		0.002836	1	0.1003	0.9038	10	72	ATCAY,GABRA1,MYO5A,NRP2,GLRB,SGCE,ALDH5A1,DYNC1H1,CACNA1A,CIT
		Mouse Phenotype	MP:0000950	abnormal seizure response to pharmacological agent		0.002868	1	0.1007	0.907	15	135	MAPT,MBP,SLC12A5,SLC1A2,CTNNB1,GABRA1,GABRB3,GABRG2,ARHGAP32,NRP2,PLCB1,CACNA1A,GRIA3,CIT,SLC4A10
		Mouse Phenotype	MP:0002922	decreased post-tetanic potentiation		0.003027	1	0.1039	0.936	4	13	VPS35,SYN1,SYN2,SYNGR1
		Mouse Phenotype	MP:0004814	reduced linear vestibular evoked potential		0.003027	1	0.1039	0.936	4	13	MBP,QKI,ATP2B2,MYO6
		Mouse Phenotype	MP:0012779	abnormal brain cholesterol level		0.003027	1	0.1039	0.936	4	13	MBP,APP,DHCR7,LRP1
		Mouse Phenotype	MP:0011616	abnormal nonassociative learning		0.003138	1	0.1051	0.947	5	21	BACE1,SLC12A5,ARHGAP32,PSAP,THRB
		Mouse Phenotype	MP:0002921	abnormal post-tetanic potentiation		0.003138	1	0.1051	0.947	5	21	PDE4B,VPS35,SYN1,SYN2,SYNGR1
		Mouse Phenotype	MP:0004994	abnormal brain wave pattern		0.003144	1	0.1051	0.947	10	73	ANK3,SLC1A2,GABRG2,GAD1,SNAP91,SYN1,SYN2,DNM1,ALDH5A1,CACNA1A
		Mouse Phenotype	MP:0009434	paraparesis		0.003154	1	0.1051	0.947	6	30	MAPT,QKI,PSAP,AGTPBP1,SYNE1,EEF1A2
		Mouse Phenotype	MP:0003216	absence seizures		0.003234	1	0.107	0.964	7	40	MBP,GABRA1,GABRB3,GABRG2,ALDH5A1,CACNA1A,GRIA3
		Mouse Phenotype	MP:0003354	astrocytosis		0.003376	1	0.1109	0.9991	14	124	MAPT,ACP2,BACE1,EI24,APP,SNCA,PSAP,NDUFS4,MLC1,AFG3L2,DYNC1H1,NTRK2,LRP1,LRPAP1
		Mouse Phenotype	MP:0009749	enhanced behavioral response to addictive substance		0.003424	1	0.1117	1	8	51	PPP1R1B,CYFIP2,ATP1A1,FYN,DLG4,CAMK4,NTRK2,GRK6
		Mouse Phenotype	MP:0002557	abnormal social/conspecific interaction		0.003509	1	0.1136	1	30	358	MAPT,MBP,ETV5,AES,PREX1,MAGED1,NPEPPS,APC,CTNNB1,RIMS2,FYN,GABRA1,GABRB3,ARHGAP32,CPLX1,NDUFS4,SNAP91,TUBA1A,GLRB,VPS13A,SYN1,SYN2,DLG4,CACNA1A,KALRN,CAMK2B,NTRK2,RGS4,GSTM5,MAPK8IP2
		Mouse Phenotype	MP:0011096	embryonic lethality between implantation and somite formation, complete penetrance		0.003613	1	0.1162	1	24	267	TPT1,HSP90B1,ACACA,UBE2I,PKNOX1,PITPNB,FGFR1,APC,DRAP1,ARF1,PPP2CA,IPO9,CTNNB1,NCDN,DHX9,BMPR1A,BMPR2,DLD,NMT1,DYNC1H1,RAC1,GRB2,SUDS3,ENO1
		Mouse Phenotype	MP:0002913	abnormal PNS synaptic transmission		0.003737	1	0.1193	1	7	41	APLP2,APP,DNAJC5,RIMS2,AFG3L2,CACNA1A,EEF1A2
		Mouse Phenotype	MP:0009046	muscle twitch		0.00384	1	0.1218	1	10	75	ATCAY,GABRA1,MYO5A,NRP2,GLRB,SGCE,ALDH5A1,DYNC1H1,CACNA1A,CIT
		Mouse Phenotype	MP:0002274	abnormal type I pneumocyte morphology		0.003897	1	0.1219	1	5	22	ABCA3,ARRB1,SNX5,DHCR7,FSTL1
		Mouse Phenotype	MP:0003750	increased mouth tumor incidence		0.003897	1	0.1219	1	5	22	APC,CTNNB1,ATP2A2,BMPR1A,KRAS
		Mouse Phenotype	MP:0000812	abnormal dentate gyrus morphology		0.003958	1	0.123	1	13	113	MAPT,MKL2,LRRTM4,VLDLR,CTNNB1,FYN,CLSTN3,ATRX,NCDN,TUBA1A,RAC1,CIT,DCLK1
		Mouse Phenotype	MP:0012314	enhanced learning		0.004073	1	0.1249	1	4	14	PDE4B,MAPT,CTNNB1,FYN
		Mouse Phenotype	MP:0010047	axonal spheroids		0.004073	1	0.1249	1	4	14	MBP,EI24,PSAP,NDUFS4
		Mouse Phenotype	MP:0002183	gliosis		0.004209	1	0.1282	1	20	211	MAPT,ACP2,BACE1,SPARCL1,VCP,EI24,APP,SNCA,PSAP,NDUFS4,MLC1,AFG3L2,VPS13A,ALDH5A1,DYNC1H1,NTRK2,EEF1A2,LRP1,LRPAP1,CDH18
		Mouse Phenotype	MP:0001447	abnormal nest building behavior		0.004296	1	0.1291	1	7	42	CTNNB1,GABRB3,NDUFS4,SNAP91,TUBA1A,KALRN,CAMK2B
		Mouse Phenotype	MP:0001475	reduced long term depression		0.004296	1	0.1291	1	7	42	UBE2A,PREX1,MYO5A,NCDN,ARHGEF9,CAMK4,CAMK2A
		Mouse Phenotype	MP:0008221	abnormal hippocampal commissure morphology		0.004425	1	0.1321	1	6	32	FGFR1,APP,CTNNB1,RAC1,VTI1A,DCLK1
		Mouse Phenotype	MP:0000604	amyloidosis		0.004637	1	0.1362	1	9	65	MAPT,BACE1,APP,VPS35,PSAP,DLST,LRP1,LRPAP1,FLOT1
		Mouse Phenotype	MP:0002230	abnormal primitive streak formation		0.004637	1	0.1362	1	9	65	TPT1,HSP90B1,PKNOX1,FGFR1,DRAP1,DHX9,BMPR1A,BMPR2,RAC1
		Mouse Phenotype	MP:0000889	abnormal cerebellar molecular layer		0.004652	1	0.1362	1	10	77	MAP1A,ACP2,ANK3,EI24,ATP2B2,MYH10,AFG3L2,CACNA1A,THRB,MAPK8IP2
		Mouse Phenotype	MP:0001684	abnormal axial mesoderm		0.004779	1	0.1391	1	5	23	FGFR1,DRAP1,PRKAR1A,CTNNB1,RAC1
		Mouse Phenotype	MP:0012065	increased astrocyte number		0.004831	1	0.1397	1	14	129	MAPT,ACP2,BACE1,EI24,APP,SNCA,PSAP,NDUFS4,MLC1,AFG3L2,DYNC1H1,NTRK2,LRP1,LRPAP1
		Mouse Phenotype	MP:0001289	persistence of hyaloid vascular system		0.004917	1	0.1408	1	7	43	MAPT,ZBTB4,SLC1A1,PRKCZ,MYO10,EMC10,DNM1L
		Mouse Phenotype	MP:0001408	stereotypic behavior		0.00493	1	0.1408	1	20	214	MAPT,CHN1,APLP2,APP,ATF2,CYFIP2,CTNNB1,ATP2B2,GABRB3,ARHGAP32,PSAP,MYO5A,MYO6,NDUFS4,SGCE,DLG4,PCSK1N,CACNA1A,NTRK2,CYCS
		Mouse Phenotype	MP:0001525	impaired balance		0.00496	1	0.1408	1	15	143	MAPT,VLDLR,CTNNB1,ATP2B2,MYH10,PSAP,MYO5A,MYO6,NDUFS4,AFG3L2,GMFB,SGCE,DLG4,CACNA1A,CAMK2B
		Mouse Phenotype	MP:0011723	ectopic neuron		0.005105	1	0.144	1	10	78	RPL27A,ACP2,PLXNB1,EVL,ATF2,YWHAZ,RNF7,WDFY3,FYN,MYH10
		Mouse Phenotype	MP:0011083	lethality at weaning, complete penetrance		0.005139	1	0.1441	1	9	66	VLDLR,ATF2,CTNNB1,GABRB3,GABRG2,PSAP,MYO5A,DBI,CACNA1A
		Mouse Phenotype	MP:0000780	abnormal corpus callosum morphology		0.005292	1	0.1475	1	15	144	MAP2,MBP,MKL2,FGFR1,PLXNB1,APP,ARHGAP5,CTNNB1,FYN,MLC1,DHCR7,RAC1,VTI1A,KIF3A,DCLK1
		Mouse Phenotype	MP:0012064	abnormal astrocyte number		0.00554	1	0.1534	1	14	131	MAPT,ACP2,BACE1,EI24,APP,SNCA,PSAP,NDUFS4,MLC1,AFG3L2,DYNC1H1,NTRK2,LRP1,LRPAP1
		Mouse Phenotype	MP:0009387	abnormal epidermal pigmentation		0.005692	1	0.1539	1	3	8	RPL27A,MYO5A,ECE1
		Mouse Phenotype	MP:0013442	abnormal Harderian gland size		0.005692	1	0.1539	1	3	8	APC,CTNNB1,KRAS
		Mouse Phenotype	MP:0008299	adrenal cortical hyperplasia		0.005692	1	0.1539	1	3	8	SCG5,PRKAR1A,NTRK2
		Mouse Phenotype	MP:0020395	abnormal response to social novelty		0.005692	1	0.1539	1	3	8	CTNNB1,GABRB3,ARHGAP32
		Mouse Phenotype	MP:0008569	lethality at weaning		0.00583	1	0.1568	1	12	105	VLDLR,ATF2,CTNNB1,GABRB3,GABRG2,PSAP,MYO5A,DBI,SNAP91,PLCB1,CACNA1A,JPH3
		Mouse Phenotype	MP:0008788	abnormal fetal cardiomyocyte morphology		0.006039	1	0.1599	1	6	34	HSP90B1,SPEG,PARVA,MYH10,SPTBN1,PIP5K1C
		Mouse Phenotype	MP:0000243	myoclonus		0.006039	1	0.1599	1	6	34	GABRA1,MYO5A,NRP2,SGCE,ALDH5A1,CIT
		Mouse Phenotype	MP:0001486	abnormal startle reflex		0.006051	1	0.1599	1	23	263	LAPTM4B,MBP,BACE1,DNAJA1,C5orf30,EVL,SORBS2,YWHAZ,CYFIP2,DNAJC5,FYN,ATP2B2,GABRA1,MYO6,NDUFS4,GLRB,PLCB1,DLG4,YPEL3,KALRN,GRIA3,PIP5K1C,CRBN
		Mouse Phenotype	MP:0010866	abnormal prenatal body size		0.006152	1	0.1608	1	60	875	TPT1,HSP90B1,ACACA,CFL1,LAPTM4B,MEIS2,CADM1,KIDINS220,GRK2,DDX54,PKNOX1,AKT1,FGFR1,SPOP,QKI,MIA3,NSD2,CHMP5,APC,SLC40A1,CNBP,PPP2CA,ARRB1,MORF4L2,OTUD6B,PRKAR1A,KDM2A,SUMO2,CTNNB1,ATP2A2,SNX2,ATRX,MYO10,VPS4A,SPTAN1,SPTBN1,KIF1B,SSR3,SUCLA2,NRP2,BMPR1A,MORF4L1,TMEM132A,DLD,DLG1,KIF5B,RAC1,KRAS,NPM1,DNAJB6,DNM1L,PIP5K1C,PDIA3,KIF3A,NDUFA13,BRD2,CYCS,LRP1,PAK2,ENO1
		Mouse Phenotype	MP:0000774	decreased brain size		0.006154	1	0.1608	1	25	294	MAPT,BACE1,PFDN5,MEF2C,MEF2D,KIDINS220,VLDLR,APP,ATF2,CNBP,SIRT2,CTNNB1,BRSK1,GAD1,KIF1B,NCAM1,DHCR7,SYN2,KIF5C,DNM1L,LAMP1,VTI1A,CIT,CYCS,EPB41L2
		Mouse Phenotype	MP:0003106	abnormal fear-related response		0.00627	1	0.1629	1	9	68	MAP2,BACE1,ADCY1,FAAH,APP,CTNNB1,FYN,GABRA1,KALRN
		Mouse Phenotype	MP:0000948	nonconvulsive seizures		0.006357	1	0.1642	1	7	45	MBP,GABRA1,GABRB3,GABRG2,ALDH5A1,CACNA1A,GRIA3
		Mouse Phenotype	MP:0008219	abnormal dorsal telencephalic commissure morphology		0.006396	1	0.1643	1	15	147	MAP2,MBP,MKL2,FGFR1,PLXNB1,APP,ARHGAP5,CTNNB1,FYN,MLC1,DHCR7,RAC1,VTI1A,KIF3A,DCLK1
		Mouse Phenotype	MP:0002182	abnormal astrocyte morphology		0.006482	1	0.1656	1	18	190	MAPT,ACP2,BACE1,CADM1,FGFR1,EI24,APP,SNCA,PSAP,NCDN,NDUFS4,MLC1,AFG3L2,DYNC1H1,KRAS,NTRK2,LRP1,LRPAP1
		Mouse Phenotype	MP:0002199	abnormal brain commissure morphology		0.006647	1	0.1688	1	17	176	MAP2,MBP,MKL2,FGFR1,PLXNB1,APP,ARHGAP5,CTNNB1,FYN,KIF1B,NRP2,MLC1,DHCR7,RAC1,VTI1A,KIF3A,DCLK1
		Mouse Phenotype	MP:0002906	increased susceptibility to pharmacologically induced seizures		0.006772	1	0.1709	1	12	107	MBP,SLC12A5,SLC1A2,CTNNB1,GABRA1,GABRB3,GABRG2,ARHGAP32,NRP2,PLCB1,CACNA1A,CIT
		Mouse Phenotype	MP:0001438	aphagia		0.006803	1	0.1709	1	15	148	USF2,APLP2,APP,GAD1,ATRX,DHCR7,DLG1,DNM1,DYNC1H1,DMTF1,SYNE1,GRB2,DNM1L,PIP5K1C,PSIP1
		Mouse Phenotype	MP:0011003	reduced AMPA-mediated synaptic currents		0.006843	1	0.171	1	4	16	VPS35,DLG4,KALRN,MAPK8IP2
		Mouse Phenotype	MP:0010280	increased skeletal tumor incidence		0.006989	1	0.1718	1	6	35	APC,PRKACA,PRKAR1A,CTNNB1,DMTF1,KRAS
		Mouse Phenotype	MP:0004996	abnormal CNS synapse formation		0.006989	1	0.1718	1	6	35	NRN1,LRRTM4,SYN1,SYN2,KALRN,DNM1L
		Mouse Phenotype	MP:0011267	abnormal excitatory postsynaptic current amplitude		0.006989	1	0.1718	1	6	35	GABRB3,SNAP91,DNM1,CACNA1A,PCLO,THRB
		Mouse Phenotype	MP:0012110	increased hair follicle number		0.007184	1	0.1729	1	2	3	CTNNB1,BMPR1A
		Mouse Phenotype	MP:0012250	absent heart valves		0.007184	1	0.1729	1	2	3	MEIS2,BMPR2
		Mouse Phenotype	MP:0010020	spleen vascular congestion		0.007184	1	0.1729	1	2	3	MORF4L1,KRAS
		Mouse Phenotype	MP:0013309	adrenal gland cyst		0.007184	1	0.1729	1	2	3	SPTBN1,SYT1
		Mouse Phenotype	MP:0000939	decreased motor neuron number		0.007277	1	0.1736	1	10	82	GPHN,PFN2,KIDINS220,GAS7,SLC1A2,CTNNB1,AFG3L2,KIF5C,DYNC1H1,NTRK2
		Mouse Phenotype	MP:0012349	increased susceptibility to induction of seizure by inducing agent		0.007287	1	0.1736	1	12	108	MBP,SLC12A5,SLC1A2,CTNNB1,GABRA1,GABRB3,GABRG2,ARHGAP32,NRP2,PLCB1,CACNA1A,CIT
		Mouse Phenotype	MP:0011380	enlarged brain ventricles		0.007586	1	0.1798	1	16	164	CFL1,CHN1,KIDINS220,PLXNB1,EVL,EI24,ATF2,RNF7,WDFY3,BRSK1,MYH10,ATP6AP1,DNM1L,VTI1A,RGS4,DCLK1
		Mouse Phenotype	MP:0002088	abnormal embryonic growth/weight/body size		0.007842	1	0.1849	1	65	973	TPT1,HSP90B1,ACACA,CFL1,LAPTM4B,MEF2C,MEIS2,GRK2,DDX54,PKNOX1,FGFR1,SPOP,QKI,MAP4K4,CHMP5,APC,APLP2,ATF2,SLC40A1,CNBP,PPP2CA,RNF7,MORF4L2,PARVA,PRKAR1A,ANKRD17,KDM2A,SUMO2,CTNNB1,ATP2A2,SNX2,GAD1,ATRX,MYO10,VPS4A,SPTAN1,SPTBN1,KIF1B,NACA,DARS,NRP2,BMPR1A,BMPR2,MORF4L1,TMEM132A,DLD,DLG1,KIF5B,RAC1,KRAS,NPM1,DNAJB6,DNM1L,PIP5K1C,PDIA3,KIF3A,NDUFA13,BRD2,G3BP1,CYCS,EIF4G2,LRP1,PAK2,H3F3B,ENO1
		Mouse Phenotype	MP:0003890	abnormal embryonic-extraembryonic boundary morphology		0.008043	1	0.1877	1	6	36	HSP90B1,FGFR1,APC,BMPR1A,BMPR2,RAC1
		Mouse Phenotype	MP:0020158	abnormal behavioral response to cocaine		0.008043	1	0.1877	1	6	36	PPP1R1B,CYFIP2,DLG4,CAMK4,NTRK2,GRK6
		Mouse Phenotype	MP:0004057	thin myocardium compact layer		0.008091	1	0.1879	1	7	47	GRK2,FKBP1A,YWHAE,ATP2A2,SPTAN1,SPTBN1,CALR
		Mouse Phenotype	MP:0001515	abnormal grip strength		0.008158	1	0.1885	1	29	364	BACE1,TIMM23,NEGR1,FRRS1L,DNAJA1,CAP2,VCP,HSP90AA1,GAS7,APP,SIRT2,DNAJC5,ATP2B2,GAA,GAD1,NDUFA8,BMPR1A,BMPR2,MLC1,DLG4,DYNC1H1,CACNA1A,NSF,CAMK2B,PSIP1,EIF4G2,DYNC1LI1,H3F3B,MAPK8IP2
		Mouse Phenotype	MP:0003989	abnormal barrel cortex morphology		0.008602	1	0.1978	1	4	17	ADCY1,GAP43,RAC1,NTRK2
		Mouse Phenotype	MP:0001697	abnormal embryo size		0.008708	1	0.1992	1	50	716	TPT1,HSP90B1,ACACA,CFL1,LAPTM4B,GRK2,DDX54,PKNOX1,FGFR1,SPOP,QKI,CHMP5,APC,SLC40A1,CNBP,PPP2CA,MORF4L2,PRKAR1A,KDM2A,SUMO2,CTNNB1,ATP2A2,SNX2,ATRX,MYO10,VPS4A,SPTAN1,SPTBN1,KIF1B,NRP2,BMPR1A,MORF4L1,TMEM132A,DLD,DLG1,KIF5B,RAC1,KRAS,NPM1,DNAJB6,DNM1L,PIP5K1C,PDIA3,KIF3A,NDUFA13,BRD2,CYCS,LRP1,PAK2,ENO1
		Mouse Phenotype	MP:0000781	decreased corpus callosum size		0.009077	1	0.206	1	7	48	PLXNB1,APP,ARHGAP5,CTNNB1,FYN,VTI1A,DCLK1
		Mouse Phenotype	MP:0009936	abnormal dendritic spine morphology		0.009094	1	0.206	1	9	72	PDE4B,BACE1,SLC12A5,KIDINS220,CYFIP2,NRP2,DLG4,TSPAN7,LRP1
		Mouse Phenotype	MP:0003651	abnormal axon extension		0.009329	1	0.2103	1	10	85	GPHN,MAPT,CFL1,NRN1,CHN1,BRSK1,GAP43,NTRK2,RTN4,VTI1A
		Mouse Phenotype	MP:0003224	neuron degeneration		0.00939	1	0.2106	1	30	384	GPHN,MAP1A,MAPT,BACE1,PFDN5,MEF2D,FAAH,QKI,VCP,VLDLR,ANK3,ATCAY,NPC2,APP,DNAJC5,GIGYF2,SNCA,ATP2B2,GABRB3,ATP6AP1,PSAP,MYO6,NDUFS4,AFG3L2,DYNC1H1,AGTPBP1,CACNA1A,EEF1A2,THRB,CHP1
		Pathway	835393	superpathway of conversion of glucose to acetyl CoA and entry into the TCA cycle	BioSystems: BIOCYC	0.0007573	1	0.00815	0.06729	7	36	PDHB,ACO2,ALDOC,SDHA,SUCLA2,DLD,DLST
		Pathway	782397	TCA cycle	BioSystems: BIOCYC	0.004143	1	0.02801	0.2312	4	16	ACO2,SDHA,SUCLA2,DLST
		Pathway	1271888	docosahexaenoate biosynthesis III (mammals)	BioSystems: BIOCYC	0.005435	1	0.03408	0.2814	2	3	ELOVL5,FADS2
		Pathway	142336	2-oxoglutarate decarboxylation to succinyl-CoA	BioSystems: BIOCYC	0.005435	1	0.03408	0.2814	2	3	DLD,DLST
		Pathway	83036	Ribosome	BioSystems: KEGG	1.528e-11	3.304e-08	1.377e-09	1.137e-08	29	154	RPL30,RPL27A,RPL35A,RPL36A,RPS3,RPS5,RPS6,MRPL30,RPS15,RPS15A,RPS17,RPS19,RPS21,RPS23,RPS24,RPL23,RPL13A,RPL3,RPL4,RPL5,RPL6,RPL7A,RPL9,RPL11,RPL12,RPL13,RPL17,RPL18,RPL19
		Pathway	83097	Alzheimer's disease	BioSystems: KEGG	2.151e-10	4.654e-07	1.861e-08	1.537e-07	29	171	MAPT,BACE1,RTN3,UQCRH,ATP5PD,SDHA,COX6A1,COX6B1,COX7C,APP,SNCA,ATP2A2,ATP5F1A,ATP5F1B,ATP5PF,NDUFA8,NDUFA9,NDUFB8,NDUFB9,NDUFS4,NDUFV2,ITPR2,PLCB1,CALM1,CALM2,RTN4,NDUFA13,CYCS,LRP1
		Pathway	82942	Oxidative phosphorylation	BioSystems: KEGG	4.108e-10	8.885e-07	3.417e-08	2.821e-07	25	133	ATP6V1D,UQCRH,ATP5PD,SDHA,COX6A1,COX6B1,COX7C,ATP6V1H,ATP6V0E2,ATP5F1A,ATP5F1B,ATP5PF,ATP6V1C1,ATP6V1E1,ATP6V0B,ATP6V1G2,ATP6AP1,NDUFA8,NDUFA9,NDUFB8,NDUFB9,NDUFS4,NDUFV2,NDUFA13,ATP6V0A2
		Pathway	373900	Synaptic vesicle cycle	BioSystems: KEGG	6.588e-09	1.425e-05	4.597e-07	3.795e-06	16	63	AP2M1,ATP6V1D,CLTC,ATP6V1H,ATP6V0E2,ATP6V1C1,ATP6V1E1,ATP6V0B,ATP6V1G2,CPLX1,SYT1,DNM1,CACNA1A,NSF,UNC13C,ATP6V0A2
		Pathway	83101	Vibrio cholerae infection	BioSystems: KEGG	1.667e-07	0.0003606	9.49e-06	7.836e-05	13	51	ACTG1,ATP6V1D,SEC61A1,ARF1,ATP6V1H,ATP6V0E2,PRKACA,ATP6V1C1,ATP6V1E1,ATP6V0B,ATP6V1G2,ATP6AP1,ATP6V0A2
		Pathway	167325	Protein processing in endoplasmic reticulum	BioSystems: KEGG	7.269e-07	0.001572	3.345e-05	0.0002762	23	166	HSP90B1,MARCH6,DNAJA1,SEC61A1,HSPA8,VCP,HSP90AA1,SEL1L,SAR1A,DNAJC5,DNAJB11,HSPH1,SSR3,DDOST,STT3A,GANAB,OS9,RBX1,CALR,PDIA3,BCAP31,SAR1B,SEC63
		Pathway	153910	Phagosome	BioSystems: KEGG	2.86e-06	0.006186	0.0001065	0.0008792	21	154	ACTG1,TUBA1B,ATP6V1D,STX7,SEC61A1,ATP6V1H,ATP6V0E2,CTSL,ATP6V1C1,ATP6V1E1,ATP6V0B,ATP6V1G2,ATP6AP1,TUBA1A,DYNC1H1,DYNC1I2,RAC1,CALR,LAMP1,DYNC1LI1,ATP6V0A2
		Pathway	83098	Parkinson's disease	BioSystems: KEGG	2.967e-06	0.006417	0.0001065	0.0008792	20	142	UQCRH,ATP5PD,SDHA,VDAC3,COX6A1,COX6B1,COX7C,PRKACA,SNCA,ATP5F1A,ATP5F1B,ATP5PF,NDUFA8,NDUFA9,NDUFB8,NDUFB9,NDUFS4,NDUFV2,NDUFA13,CYCS
		Pathway	469199	Dopaminergic synapse	BioSystems: KEGG	2.993e-06	0.006475	0.0001065	0.0008792	19	130	PPP1R1B,AKT1,ATF2,PPP1CC,PPP2CA,PPP2R2B,PRKACA,ITPR2,GNG12,PLCB1,KIF5B,KIF5C,GNB2,CACNA1A,CALM1,CALM2,CAMK2A,CAMK2B,GRIA3
		Pathway	101143	Neurotrophin signaling pathway	BioSystems: KEGG	3.301e-06	0.007139	0.0001133	0.0009356	18	119	SORT1,KIDINS220,AKT1,MAGED1,YWHAE,ARHGDIA,RAC1,KRAS,RAP1A,RAP1B,CALM1,CALM2,CAMK4,CAMK2A,CAMK2B,NTRK2,GRB2,CDC42
		Pathway	83085	Long-term potentiation	BioSystems: KEGG	4.707e-06	0.01018	0.0001497	0.001236	13	67	ADCY1,PPP1CC,PRKACA,ITPR2,PLCB1,KRAS,RAP1A,RAP1B,CALM1,CALM2,CAMK4,CAMK2A,CAMK2B
		Pathway	377263	GABAergic synapse	BioSystems: KEGG	4.823e-06	0.01043	0.0001512	0.001248	15	88	GPHN,ABAT,GABARAP,ADCY1,SLC12A5,PRKACA,TRAK2,GABRA1,GABRB3,GABRG2,GAD1,GNG12,GNB2,CACNA1A,NSF
		Pathway	908257	Adrenergic signaling in cardiomyocytes	BioSystems: KEGG	1.37e-05	0.02964	0.0003577	0.002954	19	144	ADCY1,AKT1,ATF2,PPP1CC,PPP2CA,PPP2R2B,PRKACA,ATP1A1,ATP1A2,ATP2A2,ATP2B1,ATP2B2,PLCB1,CACNB1,CALM1,CALM2,CAMK2A,CAMK2B,RAPGEF4
		Pathway	83102	Epithelial cell signaling in Helicobacter pylori infection	BioSystems: KEGG	2.986e-05	0.06458	0.0007097	0.00586	12	68	ATP6V1D,ATP6V1H,ATP6V0E2,ATP6V1C1,ATP6V1E1,ATP6V0B,ATP6V1G2,ATP6AP1,PTPRZ1,RAC1,CDC42,ATP6V0A2
		Pathway	83100	Huntington's disease	BioSystems: KEGG	3.087e-05	0.06678	0.000716	0.005911	22	193	AP2M1,CLTC,UQCRH,ATP5PD,SDHA,VDAC3,COX6A1,COX6B1,COX7C,ATP5F1A,ATP5F1B,ATP5PF,NDUFA8,NDUFA9,NDUFB8,NDUFB9,NDUFS4,NDUFV2,PLCB1,DLG4,NDUFA13,CYCS
		Pathway	552665	Morphine addiction	BioSystems: KEGG	3.323e-05	0.07188	0.0007487	0.006182	14	91	PDE4B,PDE1B,ADCY1,GRK2,ARRB1,PRKACA,PDE7B,GABRA1,GABRB3,GABRG2,GNG12,GNB2,CACNA1A,GRK6
		Pathway	1474302	Fluid shear stress and atherosclerosis	BioSystems: KEGG	3.97e-05	0.08588	0.0008763	0.007235	18	142	HSP90B1,ACTG1,MEF2C,AKT1,SDC4,HSP90AA1,SUMO2,PRKCZ,CTNNB1,CTSL,BMPR1A,BMPR2,RAC1,CALM1,CALM2,CAV2,GSTM5,GSTP1
		Pathway	102279	Endocytosis	BioSystems: KEGG	5.971e-05	0.1292	0.001254	0.01035	26	260	RAB11B,CYTH2,AP2M1,GRK2,CLTC,HSPA8,CHMP5,ARF1,ARRB1,VPS35,PRKCZ,SNX2,SNX5,PSD,VPS4A,KIF5B,KIF5C,DNM1,GRK6,CAPZA2,PSD3,CAV2,PIP5K1C,RABEP1,CDC42,ACAP2
		Pathway	143700	Vasopressin-regulated water reabsorption	BioSystems: KEGG	8.989e-05	0.1944	0.001736	0.01433	9	44	RAB11B,ARHGDIA,DYNLL2,PRKACA,DYNLL1,DYNC1H1,DYNC1I2,NSF,DYNC1LI1
		Pathway	83107	Renal cell carcinoma	BioSystems: KEGG	9.503e-05	0.2056	0.001803	0.01489	11	65	AKT1,RAC1,RBX1,KRAS,ELOB,RAP1A,RAP1B,GRB2,PAK2,CDC42,EPAS1
		Pathway	1017634	cAMP signaling pathway	BioSystems: KEGG	0.0001325	0.2865	0.002359	0.01948	21	198	PDE4B,ADCY1,PPP1R1B,AKT1,PPP1CC,PRKACA,ATP1A1,ATP1A2,ATP2A2,ATP2B1,ATP2B2,RAC1,RAP1A,RAP1B,CALM1,CALM2,CAMK4,CAMK2A,CAMK2B,RAPGEF4,GRIA3
		Pathway	868084	Fatty acid metabolism	BioSystems: KEGG	0.0001823	0.3944	0.003039	0.02509	9	48	ACACA,ACADL,ELOVL5,FASN,FADS2,HACD3,ACSBG1,ACSL6,HADHB
		Pathway	782000	Proteoglycans in cancer	BioSystems: KEGG	0.0001881	0.407	0.003083	0.02546	21	203	RPS6,ACTG1,AKT1,FGFR1,SDC4,EZR,ANK2,ANK3,PPP1CC,DROSHA,PRKACA,CTNNB1,CTSL,ITPR2,RAC1,KRAS,CAMK2A,CAMK2B,GRB2,CAV2,CDC42
		Pathway	99052	Lysosome	BioSystems: KEGG	0.000265	0.5733	0.004053	0.03347	15	123	ACP2,LAPTM4B,SORT1,CLTC,NPC2,IDS,ATP6V1H,CTSL,GAA,LGMN,ATP6V0B,ATP6AP1,PSAP,LAMP1,ATP6V0A2
		Pathway	799177	Estrogen signaling pathway	BioSystems: KEGG	0.0002931	0.634	0.004313	0.03561	13	98	HSP90B1,ADCY1,AKT1,HSPA8,HSP90AA1,ATF2,PRKACA,ITPR2,PLCB1,KRAS,CALM1,CALM2,GRB2
		Pathway	413433	GABA (gamma-Aminobutyrate) shunt	BioSystems: KEGG	0.0003109	0.6724	0.004471	0.03691	3	4	ABAT,GAD1,ALDH5A1
		Pathway	154409	Gastric acid secretion	BioSystems: KEGG	0.0003521	0.7617	0.004851	0.04006	11	75	ADCY1,EZR,PRKACA,ATP1A1,ATP1A2,ITPR2,PLCB1,CALM1,CALM2,CAMK2A,CAMK2B
		Pathway	1144996	Glucagon signaling pathway	BioSystems: KEGG	0.0004797	1	0.006139	0.05069	13	103	ACACA,PDHB,AKT1,ATF2,PRKACA,ITPR2,PLCB1,PYGB,CALM1,CALM2,CAMK2A,CAMK2B,LDHB
		Pathway	469200	Legionellosis	BioSystems: KEGG	0.0005284	1	0.006645	0.05487	9	55	HSPA8,VCP,SAR1A,ARF1,EEF1A1,EEF1A2,EEF1G,SAR1B,CYCS
		Pathway	83103	Pathogenic Escherichia coli infection	BioSystems: KEGG	0.0005284	1	0.006645	0.05487	9	55	ACTG1,TUBA1B,EZR,YWHAZ,CTNNB1,FYN,NCL,TUBA1A,CDC42
		Pathway	547607	Amphetamine addiction	BioSystems: KEGG	0.0006342	1	0.007107	0.05868	10	68	PPP1R1B,ATF2,PPP1CC,PRKACA,CALM1,CALM2,CAMK4,CAMK2A,CAMK2B,GRIA3
		Pathway	862188	Non-alcoholic fatty liver disease (NAFLD)	BioSystems: KEGG	0.0007099	1	0.007794	0.06435	16	149	AKT1,UQCRH,SDHA,COX6A1,COX6B1,COX7C,NDUFA8,NDUFA9,NDUFB8,NDUFB9,NDUFS4,NDUFV2,RAC1,NDUFA13,CYCS,CDC42
		Pathway	213307	Endocrine and other factor-regulated calcium reabsorption	BioSystems: KEGG	0.0008181	1	0.008549	0.07058	8	47	AP2M1,CLTC,PRKACA,ATP1A1,ATP1A2,ATP2B1,PLCB1,DNM1
		Pathway	169306	Pancreatic secretion	BioSystems: KEGG	0.0008547	1	0.008879	0.07331	12	96	ADCY1,ATP1A1,ATP1A2,SLC4A4,ATP2A2,ATP2B1,ATP2B2,ITPR2,PLCB1,RAC1,RAP1A,RAP1B
		Pathway	147586	Collecting duct acid secretion	BioSystems: KEGG	0.000862	1	0.008879	0.07331	6	27	ATP6V1D,ATP6V0E2,ATP6V1C1,ATP6V1E1,ATP6V1G2,ATP6V0A2
		Pathway	99051	Chemokine signaling pathway	BioSystems: KEGG	0.0009038	1	0.00919	0.07588	18	182	ADCY1,GRK2,AKT1,CX3CL1,PREX1,ARRB1,PRKACA,PRKCZ,GNG12,PLCB1,GNB2,RAC1,KRAS,RAP1A,RAP1B,GRK6,GRB2,CDC42
		Pathway	1492886	Apelin signaling pathway	BioSystems: KEGG	0.0009093	1	0.00919	0.07588	15	138	RPS6,GABARAP,ADCY1,MEF2C,MEF2D,AKT1,PRKACA,ITPR2,GNG12,PLCB1,GNB2,KRAS,CALM1,CALM2,CAMK4
		Pathway	83090	Insulin signaling pathway	BioSystems: KEGG	0.0009093	1	0.00919	0.07588	15	138	ACACA,RPS6,FASN,AKT1,SORBS1,PPP1CC,PRKACA,PRKAR1A,PRKCZ,PYGB,KRAS,CALM1,CALM2,GRB2,FLOT1
		Pathway	777534	Insulin secretion	BioSystems: KEGG	0.00104	1	0.01026	0.0847	11	85	ADCY1,ATF2,PRKACA,ATP1A1,ATP1A2,RIMS2,PLCB1,CAMK2A,CAMK2B,PCLO,RAPGEF4
		Pathway	217716	Cholinergic synapse	BioSystems: KEGG	0.00107	1	0.01047	0.08643	13	112	ADCY1,AKT1,PRKACA,FYN,ITPR2,GNG12,PLCB1,GNB2,KRAS,CACNA1A,CAMK4,CAMK2A,CAMK2B
		Pathway	537443	Retrograde endocannabinoid signaling	BioSystems: KEGG	0.001342	1	0.01185	0.09782	12	101	ADCY1,FAAH,PRKACA,GABRA1,GABRB3,GABRG2,ITPR2,GNG12,PLCB1,GNB2,CACNA1A,GRIA3
		Pathway	82927	Citrate cycle (TCA cycle)	BioSystems: KEGG	0.001549	1	0.01299	0.1072	6	30	PDHB,ACO2,SDHA,SUCLA2,DLD,DLST
		Pathway	82933	Fatty acid biosynthesis	BioSystems: KEGG	0.001805	1	0.01462	0.1207	4	13	ACACA,FASN,ACSBG1,ACSL6
		Pathway	983748	cGMP-PKG signaling pathway	BioSystems: KEGG	0.001848	1	0.01483	0.1225	16	163	ADCY1,MEF2C,MEF2D,AKT1,VDAC3,ATF2,PPP1CC,ATP1A1,ATP1A2,ATP2A2,ATP2B1,ATP2B2,ITPR2,PLCB1,CALM1,CALM2
		Pathway	83091	GnRH signaling pathway	BioSystems: KEGG	0.001998	1	0.01583	0.1307	11	92	ADCY1,PRKACA,ITPR2,PLCB1,KRAS,CALM1,CALM2,CAMK2A,CAMK2B,GRB2,CDC42
		Pathway	855811	Citrate cycle (TCA cycle, Krebs cycle)	BioSystems: KEGG	0.002112	1	0.01661	0.1372	5	22	ACO2,SDHA,SUCLA2,DLD,DLST
		Pathway	83004	Propanoate metabolism	BioSystems: KEGG	0.002197	1	0.01716	0.1417	6	32	ABAT,ACACA,SUCLA2,DLD,LDHB,PCCB
		Pathway	413348	Citrate cycle, second carbon oxidation, 2-oxoglutarate => oxaloacetate	BioSystems: KEGG	0.002441	1	0.01872	0.1546	4	14	SDHA,SUCLA2,DLD,DLST
		Pathway	1272485	Aldosterone synthesis and secretion	BioSystems: KEGG	0.002722	1	0.01996	0.1648	10	82	ADCY1,ATF2,PRKACA,ITPR2,PLCB1,CALM1,CALM2,CAMK4,CAMK2A,CAMK2B
		Pathway	698773	Circadian entrainment	BioSystems: KEGG	0.002808	1	0.02052	0.1694	11	96	ADCY1,PRKACA,NOS1AP,GNG12,PLCB1,GNB2,CALM1,CALM2,CAMK2A,CAMK2B,GRIA3
		Pathway	83048	MAPK signaling pathway	BioSystems: KEGG	0.00353	1	0.02487	0.2054	21	255	MAPT,MEF2C,AKT1,FGFR1,MAP4K4,HSPA8,ATF2,ARRB1,PRKACA,GNG12,RAC1,KRAS,CACNA1A,CACNB1,RAP1A,RAP1B,NTRK2,GRB2,PAK2,CDC42,MAPK8IP2
		Pathway	213818	Glutamatergic synapse	BioSystems: KEGG	0.003751	1	0.026	0.2147	12	114	ADCY1,GRK2,SLC1A1,SLC1A2,PRKACA,ITPR2,GNG12,PLCB1,DLG4,GNB2,CACNA1A,GRIA3
		Pathway	814926	Carbon metabolism	BioSystems: KEGG	0.003751	1	0.026	0.2147	12	114	PDHB,ACO2,ALDOC,SDHA,PSAT1,SUCLA2,DLD,DLST,GOT1,GOT2,ENO1,PCCB
		Pathway	149807	Bacterial invasion of epithelial cells	BioSystems: KEGG	0.005318	1	0.03408	0.2814	9	76	ACTG1,CLTC,ELMO2,CTNNB1,SEPT8,DNM1,RAC1,CAV2,CDC42
		Pathway	153376	Salivary secretion	BioSystems: KEGG	0.005359	1	0.03408	0.2814	10	90	ADCY1,PRKACA,ATP1A1,ATP1A2,ATP2B1,ATP2B2,ITPR2,PLCB1,CALM1,CALM2
		Pathway	200309	Rheumatoid arthritis	BioSystems: KEGG	0.005359	1	0.03408	0.2814	10	90	ATP6V1D,ATP6V1H,ATP6V0E2,CTSL,ATP6V1C1,ATP6V1E1,ATP6V0B,ATP6V1G2,ATP6AP1,ATP6V0A2
		Pathway	879730	Fatty acid biosynthesis, initiation	BioSystems: KEGG	0.005435	1	0.03408	0.2814	2	3	ACACA,FASN
		Pathway	952859	Oxytocin signaling pathway	BioSystems: KEGG	0.006481	1	0.03823	0.3157	14	153	ACTG1,ADCY1,MEF2C,PPP1CC,PRKACA,ITPR2,PLCB1,KRAS,CACNB1,CALM1,CALM2,CAMK4,CAMK2A,CAMK2B
		Pathway	749777	Hippo signaling pathway	BioSystems: KEGG	0.006856	1	0.03998	0.3301	14	154	ACTG1,APC,YWHAE,YWHAZ,PPP1CC,PPP2CA,PPP2R2B,CSNK1E,PRKCZ,CTNNB1,BMPR1A,BMPR2,DLG1,DLG4
		Pathway	126909	Oocyte meiosis	BioSystems: KEGG	0.007342	1	0.04258	0.3515	12	124	ADCY1,YWHAE,YWHAZ,PPP1CC,PPP2CA,PRKACA,ITPR2,RBX1,CALM1,CALM2,CAMK2A,CAMK2B
		Pathway	868086	Rap1 signaling pathway	BioSystems: KEGG	0.009651	1	0.05258	0.4342	17	210	ACTG1,PFN2,ADCY1,AKT1,FGFR1,PRKCZ,CTNNB1,PLCB1,RAC1,KRAS,RALGDS,RAP1A,RAP1B,CALM1,CALM2,RAPGEF4,CDC42
		Pathway	137984	Lissencephaly gene (LIS1) in neuronal migration and development	BioSystems: Pathway Interaction Database	4.223e-06	0.009134	0.0001405	0.00116	9	31	VLDLR,YWHAE,DYNC1H1,RAC1,CALM1,CALM2,PAFAH1B2,LRPAP1,CDC42
		Pathway	138057	ErbB1 downstream signaling	BioSystems: Pathway Interaction Database	7.148e-06	0.01546	0.0002089	0.001725	16	102	RPS6,MEF2C,AKT1,ATF2,YWHAE,YWHAZ,CYFIP2,PPP2CA,PRKCZ,RAC1,RALGDS,CALM1,CALM2,GRB2,PEBP1,CDC42
		Pathway	137919	N-cadherin signaling events	BioSystems: Pathway Interaction Database	7.477e-06	0.01617	0.0002148	0.001773	9	33	FGFR1,MAPRE1,CTNNB1,GAP43,KIF5B,RAC1,CALM1,CALM2,PIP5K1C
		Pathway	137940	Signaling events mediated by VEGFR1 and VEGFR2	BioSystems: Pathway Interaction Database	1.332e-05	0.02882	0.0003558	0.002937	12	63	AKT1,HSP90AA1,PRKACA,CTNNB1,FYN,NRP2,RAC1,CALM1,CALM2,GRB2,CDC42,EPAS1
		Pathway	137953	Role of Calcineurin-dependent NFAT signaling in lymphocytes	BioSystems: Pathway Interaction Database	5.384e-05	0.1164	0.001142	0.009426	10	51	MEF2D,FKBP1A,YWHAE,YWHAZ,PRKACA,PRKCZ,CALM1,CALM2,CAMK4,CHP1
		Pathway	138062	Signaling events mediated by HDAC Class II	BioSystems: Pathway Interaction Database	7.741e-05	0.1674	0.00155	0.0128	8	34	MEF2C,TUBA1B,GRK2,UBE2I,HSP90AA1,YWHAE,NCOR2,CAMK4
		Pathway	137938	IL2 signaling events mediated by PI3K	BioSystems: Pathway Interaction Database	0.0001468	0.3176	0.002481	0.02049	8	37	RPS6,AKT1,HSP90AA1,PRKCZ,RAC1,CALM1,CALM2,GRB2
		Pathway	137981	Insulin-mediated glucose transport	BioSystems: Pathway Interaction Database	0.0001841	0.3981	0.003039	0.02509	7	29	AKT1,YWHAE,YWHAZ,PPP1CC,PRKCZ,CALM1,CALM2
		Pathway	138019	p75(NTR)-mediated signaling	BioSystems: Pathway Interaction Database	0.0002578	0.5576	0.004012	0.03312	10	61	SORT1,AKT1,MAGED1,APP,YWHAE,ARHGDIA,PRKCZ,RAC1,RTN4,CYCS
		Pathway	138022	Class I PI3K signaling events	BioSystems: Pathway Interaction Database	0.0003121	0.6751	0.004471	0.03691	8	41	CYTH2,PREX1,HSP90AA1,ARF1,FYN,RAC1,RAP1A,PLEKHA1
		Pathway	138005	E-cadherin signaling in the nascent adherens junction	BioSystems: Pathway Interaction Database	0.0004336	0.9379	0.005764	0.04759	7	33	AKT1,CYFIP2,CTNNB1,DLG1,RAC1,PIP5K1C,CDC42
		Pathway	169355	RAC1 signaling pathway	BioSystems: Pathway Interaction Database	0.0004592	0.9933	0.00605	0.04995	9	54	CFL1,ATF2,CYFIP2,ARHGAP5,ARHGDIA,CTNNB1,RAC1,PIP5K1C,PAK2
		Pathway	137994	CDC42 signaling events	BioSystems: Pathway Interaction Database	0.000801	1	0.008451	0.06978	10	70	CFL1,APC,ATF2,ARHGDIA,PRKCZ,CTNNB1,DLG1,RAC1,PAK2,CDC42
		Pathway	137924	VEGFR1 specific signals	BioSystems: Pathway Interaction Database	0.001285	1	0.01156	0.09544	6	29	AKT1,HSP90AA1,PRKACA,NRP2,CALM1,CALM2
		Pathway	137980	Reelin signaling pathway	BioSystems: Pathway Interaction Database	0.001285	1	0.01156	0.09544	6	29	MAPT,AKT1,VLDLR,FYN,RAP1A,LRPAP1
		Pathway	137910	CXCR4-mediated signaling events	BioSystems: Pathway Interaction Database	0.00153	1	0.01287	0.1063	10	76	CFL1,GRK2,AKT1,PRKCZ,FYN,VPS4A,PLCB1,DNM1,RAP1B,GRK6
		Pathway	137957	LKB1 signaling events	BioSystems: Pathway Interaction Database	0.001957	1	0.01556	0.1285	7	42	MAP2,HSP90AA1,EZR,YWHAE,YWHAZ,PRKACA,BRSK1
		Pathway	137967	Trk receptor signaling mediated by PI3K and PLC-gamma	BioSystems: Pathway Interaction Database	0.002197	1	0.01716	0.1417	6	32	AKT1,YWHAE,YWHAZ,CAMK4,CAMK2A,GRB2
		Pathway	138047	EPHB forward signaling	BioSystems: Pathway Interaction Database	0.002589	1	0.01916	0.1582	6	33	MAP4K4,DNM1,RAC1,KALRN,GRB2,CDC42
		Pathway	138060	Thromboxane A2 receptor signaling	BioSystems: Pathway Interaction Database	0.002944	1	0.02144	0.177	7	45	GRK2,AKT1,PRKACA,PRKCZ,FYN,DNM1,RAC1
		Pathway	138056	Hypoxic and oxygen homeostasis regulation of HIF-1-alpha	BioSystems: Pathway Interaction Database	0.003216	1	0.02288	0.1889	4	15	HSP90AA1,OS9,RBX1,ELOB
		Pathway	138067	p53 pathway	BioSystems: Pathway Interaction Database	0.003668	1	0.02576	0.2127	8	59	RPL23,AKT1,PPP2CA,CSNK1E,COP1,CCNG1,RPL5,RPL11
		Pathway	138024	TGF-beta receptor signaling	BioSystems: Pathway Interaction Database	0.006014	1	0.03685	0.3042	7	51	FKBP1A,YWHAE,PPP2CA,CTNNB1,SPTBN1,CAMK2A,GRB2
		Pathway	169346	Regulation of RAC1 activity	BioSystems: Pathway Interaction Database	0.00613	1	0.03735	0.3084	6	39	CHN1,PREX1,ARHGDIA,RAC1,KALRN,SPATA13
		Pathway	137992	IGF1 pathway	BioSystems: Pathway Interaction Database	0.006368	1	0.03823	0.3157	5	28	AKT1,YWHAE,YWHAZ,PRKCZ,GRB2
		Pathway	137941	Calcium signaling in the CD4+ TCR pathway	BioSystems: Pathway Interaction Database	0.006368	1	0.03823	0.3157	5	28	FKBP1A,PRKACA,CALM1,CALM2,CHP1
		Pathway	137927	Arf1 pathway	BioSystems: Pathway Interaction Database	0.006505	1	0.03823	0.3157	4	18	CYTH2,AP2M1,ARF1,RAC1
		Pathway	169356	RhoA signaling pathway	BioSystems: Pathway Interaction Database	0.007856	1	0.04472	0.3692	6	41	CFL1,EZR,ATF2,PRKCZ,PIP5K1C,CDC42
		Pathway	138015	Regulation of cytoplasmic and nuclear SMAD2/3 signaling	BioSystems: Pathway Interaction Database	0.007962	1	0.04473	0.3693	4	19	UBE2I,CALM1,CALM2,CTDSP2
		Pathway	137990	Regulation of CDC42 activity	BioSystems: Pathway Interaction Database	0.008603	1	0.04808	0.397	5	30	APC,ARHGDIA,ARHGEF9,CDC42,SPATA13
		Pathway	1268678	Translation	BioSystems: REACTOME	2.397e-21	5.184e-18	5.184e-18	4.28e-17	42	165	RPL30,RPL27A,RPL35A,RPL36A,RPS3,RPS5,RPS6,RPS15,RPS15A,RPS17,RPS19,RPS21,RPS23,RPS24,RPL23,SEC61A1,SPCS1,PABPC1,EIF5B,EIF3H,SEC11C,SSR3,DDOST,EEF1A1,EEF1A2,EEF1G,EIF1AX,EIF4A2,EIF5,RPL13A,RPL3,RPL4,RPL5,RPL6,RPL7A,RPL9,RPL11,RPL12,RPL13,RPL17,RPL18,RPL19
		Pathway	1268690	Eukaryotic Translation Elongation	BioSystems: REACTOME	4.565e-19	9.873e-16	4.937e-16	4.076e-15	31	98	RPL30,RPL27A,RPL35A,RPL36A,RPS3,RPS5,RPS6,RPS15,RPS15A,RPS17,RPS19,RPS21,RPS23,RPS24,RPL23,EEF1A1,EEF1A2,EEF1G,RPL13A,RPL3,RPL4,RPL5,RPL6,RPL7A,RPL9,RPL11,RPL12,RPL13,RPL17,RPL18,RPL19
		Pathway	1268689	SRP-dependent cotranslational protein targeting to membrane	BioSystems: REACTOME	1.26e-18	2.724e-15	9.081e-16	7.498e-15	33	116	RPL30,RPL27A,RPL35A,RPL36A,RPS3,RPS5,RPS6,RPS15,RPS15A,RPS17,RPS19,RPS21,RPS23,RPS24,RPL23,SEC61A1,SPCS1,SEC11C,SSR3,DDOST,RPL13A,RPL3,RPL4,RPL5,RPL6,RPL7A,RPL9,RPL11,RPL12,RPL13,RPL17,RPL18,RPL19
		Pathway	1268686	GTP hydrolysis and joining of the 60S ribosomal subunit	BioSystems: REACTOME	2.985e-18	6.457e-15	1.102e-15	9.098e-15	33	119	RPL30,RPL27A,RPL35A,RPL36A,RPS3,RPS5,RPS6,RPS15,RPS15A,RPS17,RPS19,RPS21,RPS23,RPS24,RPL23,EIF5B,EIF3H,EIF1AX,EIF4A2,EIF5,RPL13A,RPL3,RPL4,RPL5,RPL6,RPL7A,RPL9,RPL11,RPL12,RPL13,RPL17,RPL18,RPL19
		Pathway	1268680	Cap-dependent Translation Initiation	BioSystems: REACTOME	3.057e-18	6.612e-15	1.102e-15	9.098e-15	34	127	RPL30,RPL27A,RPL35A,RPL36A,RPS3,RPS5,RPS6,RPS15,RPS15A,RPS17,RPS19,RPS21,RPS23,RPS24,RPL23,PABPC1,EIF5B,EIF3H,EIF1AX,EIF4A2,EIF5,RPL13A,RPL3,RPL4,RPL5,RPL6,RPL7A,RPL9,RPL11,RPL12,RPL13,RPL17,RPL18,RPL19
		Pathway	1268679	Eukaryotic Translation Initiation	BioSystems: REACTOME	3.057e-18	6.612e-15	1.102e-15	9.098e-15	34	127	RPL30,RPL27A,RPL35A,RPL36A,RPS3,RPS5,RPS6,RPS15,RPS15A,RPS17,RPS19,RPS21,RPS23,RPS24,RPL23,PABPC1,EIF5B,EIF3H,EIF1AX,EIF4A2,EIF5,RPL13A,RPL3,RPL4,RPL5,RPL6,RPL7A,RPL9,RPL11,RPL12,RPL13,RPL17,RPL18,RPL19
		Pathway	1268691	Peptide chain elongation	BioSystems: REACTOME	1.005e-17	2.173e-14	3.105e-15	2.563e-14	29	93	RPL30,RPL27A,RPL35A,RPL36A,RPS3,RPS5,RPS6,RPS15,RPS15A,RPS17,RPS19,RPS21,RPS23,RPS24,RPL23,EEF1A1,RPL13A,RPL3,RPL4,RPL5,RPL6,RPL7A,RPL9,RPL11,RPL12,RPL13,RPL17,RPL18,RPL19
		Pathway	1268688	L13a-mediated translational silencing of Ceruloplasmin expression	BioSystems: REACTOME	2.661e-17	5.755e-14	7.194e-15	5.94e-14	32	119	RPL30,RPL27A,RPL35A,RPL36A,RPS3,RPS5,RPS6,RPS15,RPS15A,RPS17,RPS19,RPS21,RPS23,RPS24,RPL23,PABPC1,EIF3H,EIF1AX,EIF4A2,RPL13A,RPL3,RPL4,RPL5,RPL6,RPL7A,RPL9,RPL11,RPL12,RPL13,RPL17,RPL18,RPL19
		Pathway	1268681	Formation of a pool of free 40S subunits	BioSystems: REACTOME	7.528e-17	1.628e-13	1.809e-14	1.494e-13	30	107	RPL30,RPL27A,RPL35A,RPL36A,RPS3,RPS5,RPS6,RPS15,RPS15A,RPS17,RPS19,RPS21,RPS23,RPS24,RPL23,EIF3H,EIF1AX,RPL13A,RPL3,RPL4,RPL5,RPL6,RPL7A,RPL9,RPL11,RPL12,RPL13,RPL17,RPL18,RPL19
		Pathway	1269718	Nonsense Mediated Decay (NMD) independent of the Exon Junction Complex (EJC)	BioSystems: REACTOME	9.109e-17	1.97e-13	1.97e-14	1.627e-13	29	100	RPL30,RPL27A,RPL35A,RPL36A,RPS3,RPS5,RPS6,RPS15,RPS15A,RPS17,RPS19,RPS21,RPS23,RPS24,RPL23,PABPC1,RPL13A,RPL3,RPL4,RPL5,RPL6,RPL7A,RPL9,RPL11,RPL12,RPL13,RPL17,RPL18,RPL19
		Pathway	1269120	Viral mRNA Translation	BioSystems: REACTOME	1.047e-16	2.264e-13	2.059e-14	1.7e-13	28	93	RPL30,RPL27A,RPL35A,RPL36A,RPS3,RPS5,RPS6,RPS15,RPS15A,RPS17,RPS19,RPS21,RPS23,RPS24,RPL23,RPL13A,RPL3,RPL4,RPL5,RPL6,RPL7A,RPL9,RPL11,RPL12,RPL13,RPL17,RPL18,RPL19
		Pathway	1339156	Selenocysteine synthesis	BioSystems: REACTOME	2.643e-16	5.717e-13	4.764e-14	3.934e-13	28	96	RPL30,RPL27A,RPL35A,RPL36A,RPS3,RPS5,RPS6,RPS15,RPS15A,RPS17,RPS19,RPS21,RPS23,RPS24,RPL23,RPL13A,RPL3,RPL4,RPL5,RPL6,RPL7A,RPL9,RPL11,RPL12,RPL13,RPL17,RPL18,RPL19
		Pathway	1268692	Eukaryotic Translation Termination	BioSystems: REACTOME	3.568e-16	7.718e-13	5.937e-14	4.902e-13	28	97	RPL30,RPL27A,RPL35A,RPL36A,RPS3,RPS5,RPS6,RPS15,RPS15A,RPS17,RPS19,RPS21,RPS23,RPS24,RPL23,RPL13A,RPL3,RPL4,RPL5,RPL6,RPL7A,RPL9,RPL11,RPL12,RPL13,RPL17,RPL18,RPL19
		Pathway	1269717	Nonsense Mediated Decay (NMD) enhanced by the Exon Junction Complex (EJC)	BioSystems: REACTOME	3.027e-15	6.546e-12	4.364e-13	3.603e-12	30	121	RPL30,RPL27A,RPL35A,RPL36A,RPS3,RPS5,RPS6,RPS15,RPS15A,RPS17,RPS19,RPS21,RPS23,RPS24,RPL23,PABPC1,PPP2CA,RPL13A,RPL3,RPL4,RPL5,RPL6,RPL7A,RPL9,RPL11,RPL12,RPL13,RPL17,RPL18,RPL19
		Pathway	1269716	Nonsense-Mediated Decay (NMD)	BioSystems: REACTOME	3.027e-15	6.546e-12	4.364e-13	3.603e-12	30	121	RPL30,RPL27A,RPL35A,RPL36A,RPS3,RPS5,RPS6,RPS15,RPS15A,RPS17,RPS19,RPS21,RPS23,RPS24,RPL23,PABPC1,PPP2CA,RPL13A,RPL3,RPL4,RPL5,RPL6,RPL7A,RPL9,RPL11,RPL12,RPL13,RPL17,RPL18,RPL19
		Pathway	1269056	Infectious disease	BioSystems: REACTOME	2.72e-14	5.884e-11	3.677e-12	3.036e-11	54	393	RPL30,RPL27A,RPL35A,RPL36A,RPS3,RPS5,RPS6,RPS15,RPS15A,RPS17,RPS19,RPS21,RPS23,RPS24,RPL23,AP2M1,CLTC,HSP90AA1,CHMP5,ARF1,ATP6V1H,CTNNB1,FYN,VPS4A,PSMC6,PSMD5,PSMD11,SV2B,VAMP1,SYT1,NMT1,RAC1,RBX1,NPM1,ELOB,CALM1,CALM2,CALR,GRB2,PSIP1,PAK2,RPL13A,RPL3,RPL4,RPL5,RPL6,RPL7A,RPL9,RPL11,RPL12,RPL13,RPL17,RPL18,RPL19
		Pathway	1339149	Selenoamino acid metabolism	BioSystems: REACTOME	3.652e-14	7.9e-11	4.647e-12	3.837e-11	29	123	RPL30,RPL27A,RPL35A,RPL36A,RPS3,RPS5,RPS6,RPS15,RPS15A,RPS17,RPS19,RPS21,RPS23,RPS24,RPL23,DARS,RPL13A,RPL3,RPL4,RPL5,RPL6,RPL7A,RPL9,RPL11,RPL12,RPL13,RPL17,RPL18,RPL19
		Pathway	1269109	Influenza Life Cycle	BioSystems: REACTOME	1.237e-13	2.676e-10	1.487e-11	1.228e-10	31	147	RPL30,RPL27A,RPL35A,RPL36A,RPS3,RPS5,RPS6,RPS15,RPS15A,RPS17,RPS19,RPS21,RPS23,RPS24,RPL23,CLTC,HSP90AA1,CALR,RPL13A,RPL3,RPL4,RPL5,RPL6,RPL7A,RPL9,RPL11,RPL12,RPL13,RPL17,RPL18,RPL19
		Pathway	1269115	Influenza Viral RNA Transcription and Replication	BioSystems: REACTOME	8.53e-13	1.845e-09	9.711e-11	8.018e-10	29	138	RPL30,RPL27A,RPL35A,RPL36A,RPS3,RPS5,RPS6,RPS15,RPS15A,RPS17,RPS19,RPS21,RPS23,RPS24,RPL23,HSP90AA1,RPL13A,RPL3,RPL4,RPL5,RPL6,RPL7A,RPL9,RPL11,RPL12,RPL13,RPL17,RPL18,RPL19
		Pathway	1269108	Influenza Infection	BioSystems: REACTOME	9.576e-13	2.071e-09	1.036e-10	8.551e-10	31	158	RPL30,RPL27A,RPL35A,RPL36A,RPS3,RPS5,RPS6,RPS15,RPS15A,RPS17,RPS19,RPS21,RPS23,RPS24,RPL23,CLTC,HSP90AA1,CALR,RPL13A,RPL3,RPL4,RPL5,RPL6,RPL7A,RPL9,RPL11,RPL12,RPL13,RPL17,RPL18,RPL19
		Pathway	1269876	Vesicle-mediated transport	BioSystems: REACTOME	1.732e-12	3.747e-09	1.784e-10	1.473e-09	70	660	RAB11B,HSP90B1,CYTH2,GABARAP,RABGAP1,COPS2,SORT1,AP2M1,GRK2,CLTC,AKT1,HSPA8,HSP90AA1,MIA3,ANK2,ANK3,CHMP5,APP,RAB14,RAB6B,YWHAE,YWHAZ,ARF1,ARL1,RAB3GAP1,ARRB1,NAPB,DYNLL2,TMED9,DYNLL1,CLINT1,VAMP4,RAB21,SNX2,SNX5,GAPVD1,MYO5A,MYO6,VPS4A,SPTAN1,SPTBN1,KIF1B,HSPH1,GDI2,SNAP91,SYT1,KIF5B,MAP1LC3B,DNM1,RAB6A,DYNC1H1,DYNC1I2,RAC1,RAB12,CALM1,CALM2,NSF,CALR,HIP1R,GRB2,VTI1A,PIP5K1C,KIF3A,RABEP1,SAR1B,P…
		Pathway	1268766	Transmission across Chemical Synapses	BioSystems: REACTOME	3.04e-12	6.575e-09	2.989e-10	2.468e-09	36	218	ABAT,ADCY1,AP2M1,HSPA8,SLC1A1,SLC1A2,CASK,NPTN,PRKACA,DNAJC5,GABRA1,GABRB3,GABRG2,GAD1,MYO6,CPLX1,GNG12,ARHGEF9,PLCB1,SYN1,SYN2,SYT1,DLG1,DLG4,GNB2,ALDH5A1,CACNA1A,CACNB1,CALM1,CALM2,NSF,CAMK4,CAMK2A,CAMK2B,GRIA3,TSPAN7
		Pathway	1269877	Membrane Trafficking	BioSystems: REACTOME	1.283e-11	2.774e-08	1.206e-09	9.959e-09	65	614	RAB11B,CYTH2,GABARAP,RABGAP1,COPS2,SORT1,AP2M1,GRK2,CLTC,AKT1,HSPA8,MIA3,ANK2,ANK3,CHMP5,APP,RAB14,RAB6B,YWHAE,YWHAZ,ARF1,ARL1,RAB3GAP1,ARRB1,NAPB,DYNLL2,TMED9,DYNLL1,CLINT1,VAMP4,RAB21,SNX2,SNX5,GAPVD1,MYO5A,MYO6,VPS4A,SPTAN1,SPTBN1,KIF1B,GDI2,SNAP91,SYT1,KIF5B,MAP1LC3B,DNM1,RAB6A,DYNC1H1,DYNC1I2,RAC1,RAB12,CALM1,CALM2,NSF,HIP1R,GRB2,VTI1A,PIP5K1C,KIF3A,RABEP1,SAR1B,PAFAH1B2,DYNC1LI1,STX6,TPD52
		Pathway	1268854	Disease	BioSystems: REACTOME	7.577e-10	1.639e-06	6.07e-08	5.012e-07	77	867	RPL30,RPL27A,RPL35A,RPL36A,ACACA,RPS3,RPS5,RPS6,RPS15,RPS15A,RPS17,RPS19,RPS21,RPS23,RPS24,RPL23,AP2M1,CLTC,AKT1,FGFR1,QKI,FKBP1A,SDC4,VCP,HSP90AA1,SEL1L,CHMP5,APC,APP,YWHAE,ARF1,TRAK1,PPP2CA,NCOR2,ATP6V1H,ARRB1,CTNNB1,FYN,VPS4A,PSMC6,PSMD5,PSMD11,MPRIP,SV2B,VAMP1,SYT1,OS9,NMT1,RAC1,RBX1,KRAS,NPM1,ELOB,RAP1A,RAP1B,CALM1,CALM2,CALR,AGGF1,GRB2,PSIP1,PEBP1,PAK2,RPL13A,PCCB,RPL3,RPL4,RPL5,RPL6,RPL7A,…
		Pathway	1383086	Major pathway of rRNA processing in the nucleolus and cytosol	BioSystems: REACTOME	8.638e-10	1.868e-06	6.673e-08	5.51e-07	29	181	RPL30,RPL27A,RPL35A,RPL36A,RPS3,RPS5,RPS6,RPS15,RPS15A,RPS17,RPS19,RPS21,RPS23,RPS24,RPL23,CSNK1E,RPL13A,RPL3,RPL4,RPL5,RPL6,RPL7A,RPL9,RPL11,RPL12,RPL13,RPL17,RPL18,RPL19
		Pathway	1268763	Neuronal System	BioSystems: REACTOME	1.86e-09	4.022e-06	1.387e-07	1.145e-06	42	351	ABAT,RTN3,ADCY1,AP2M1,LRRTM4,HSPA8,SLC1A1,SLC1A2,CASK,NPTN,PRKACA,DNAJC5,GABRA1,GABRB3,GABRG2,GAD1,MYO6,CPLX1,PTPRD,GNG12,ARHGEF9,PLCB1,SYN1,SYN2,KCNAB1,SYT1,DLG1,DLG4,GNB2,ALDH5A1,CACNA1A,CACNB1,CALM1,CALM2,NSF,CAMK4,CAMK2A,CAMK2B,GRIA3,TSPAN7,FLOT1,EPB41L2
		Pathway	1427846	rRNA processing in the nucleus and cytosol	BioSystems: REACTOME	3.991e-09	8.633e-06	2.878e-07	2.376e-06	29	193	RPL30,RPL27A,RPL35A,RPL36A,RPS3,RPS5,RPS6,RPS15,RPS15A,RPS17,RPS19,RPS21,RPS23,RPS24,RPL23,CSNK1E,RPL13A,RPL3,RPL4,RPL5,RPL6,RPL7A,RPL9,RPL11,RPL12,RPL13,RPL17,RPL18,RPL19
		Pathway	1270158	Metabolism of amino acids and derivatives	BioSystems: REACTOME	7.109e-09	1.538e-05	4.805e-07	3.968e-06	42	367	RPL30,RPL27A,RPL35A,RPL36A,PDHB,RPS3,RPS5,RPS6,RPS15,RPS15A,RPS17,RPS19,RPS21,RPS23,RPS24,RPL23,SERINC1,PSAT1,ASRGL1,SMS,PSMC6,DARS,PSMD5,PSMD11,DLD,SERINC3,DLST,GOT1,GOT2,RPL13A,RPL3,RPL4,RPL5,RPL6,RPL7A,RPL9,RPL11,RPL12,RPL13,RPL17,RPL18,RPL19
		Pathway	1383085	rRNA processing	BioSystems: REACTOME	1.292e-08	2.794e-05	8.465e-07	6.99e-06	29	203	RPL30,RPL27A,RPL35A,RPL36A,RPS3,RPS5,RPS6,RPS15,RPS15A,RPS17,RPS19,RPS21,RPS23,RPS24,RPL23,CSNK1E,RPL13A,RPL3,RPL4,RPL5,RPL6,RPL7A,RPL9,RPL11,RPL12,RPL13,RPL17,RPL18,RPL19
		Pathway	1269443	Signalling by NGF	BioSystems: REACTOME	2.077e-08	4.492e-05	1.321e-06	1.091e-05	49	483	PDE1B,ADCY1,MEF2C,AP2M1,KIDINS220,GRK2,CLTC,AKT1,FGFR1,PREX1,MAGED1,TNRC6C,YWHAE,PPP2CA,ARHGDIA,ARRB1,PRKACA,PRKAR1A,FYN,AHCYL1,SPTAN1,SPTBN1,PSMC6,NCAM1,PSMD5,PSMD11,ITPR2,ARHGEF9,DLG4,DNM1,RAC1,RBX1,KRAS,RALGDS,RAP1A,RAP1B,CALM1,CALM2,KALRN,CAMK4,CAMK2A,CAMK2B,NTRK2,RTN4,GRB2,RASGEF1A,PIP5K1C,PEBP1,SPRED1
		Pathway	1270121	The citric acid (TCA) cycle and respiratory electron transport	BioSystems: REACTOME	8.286e-08	0.0001792	5.121e-06	4.228e-05	25	171	PDHB,ACO2,UQCRH,ATP5PD,SDHA,COX6A1,COX6B1,COX7C,ATP5F1A,ATP5F1B,ATP5PF,NDUFA8,NDUFA9,SUCLA2,NDUFB8,NDUFB9,NDUFS4,NDUFV2,GLO1,DLD,DLST,LDHB,NDUFA13,TRAP1,CYCS
		Pathway	1269950	Ion channel transport	BioSystems: REACTOME	9.388e-08	0.0002031	5.64e-06	4.657e-05	28	209	TTYH1,ATP8A1,ATP6V1D,ATP6V1H,ATP6V0E2,ATP1A1,ATP1A2,ATP2A2,ATP2B1,ATP2B2,GABRA1,GABRB3,GABRG2,ATP6V1C1,ATP6V1E1,ATP6V0B,ATP6V1G2,ATP6AP1,SRI,GLRB,ARHGEF9,WNK2,CALM1,CALM2,CAMK2A,CAMK2B,ATP9A,ATP6V0A2
		Pathway	1269460	NGF signalling via TRKA from the plasma membrane	BioSystems: REACTOME	1.188e-07	0.0002569	6.944e-06	5.734e-05	41	390	PDE1B,ADCY1,MEF2C,AP2M1,KIDINS220,GRK2,CLTC,AKT1,FGFR1,TNRC6C,PPP2CA,ARRB1,PRKACA,PRKAR1A,FYN,AHCYL1,SPTAN1,SPTBN1,PSMC6,NCAM1,PSMD5,PSMD11,ITPR2,DLG4,DNM1,RBX1,KRAS,RALGDS,RAP1A,RAP1B,CALM1,CALM2,CAMK4,CAMK2A,CAMK2B,NTRK2,GRB2,RASGEF1A,PIP5K1C,PEBP1,SPRED1
		Pathway	1268786	Neurotransmitter Receptor Binding And Downstream Transmission In The Postsynaptic Cell	BioSystems: REACTOME	3.284e-07	0.0007104	1.821e-05	0.0001504	22	147	ADCY1,AP2M1,NPTN,PRKACA,GABRA1,GABRB3,GABRG2,MYO6,GNG12,ARHGEF9,PLCB1,DLG1,DLG4,GNB2,CALM1,CALM2,NSF,CAMK4,CAMK2A,CAMK2B,GRIA3,TSPAN7
		Pathway	1268685	Ribosomal scanning and start codon recognition	BioSystems: REACTOME	3.541e-07	0.000766	1.915e-05	0.0001581	14	63	RPS3,RPS5,RPS6,RPS15,RPS15A,RPS17,RPS19,RPS21,RPS23,RPS24,EIF3H,EIF1AX,EIF4A2,EIF5
		Pathway	1268684	Translation initiation complex formation	BioSystems: REACTOME	4.356e-07	0.0009422	2.298e-05	0.0001897	14	64	RPS3,RPS5,RPS6,RPS15,RPS15A,RPS17,RPS19,RPS21,RPS23,RPS24,PABPC1,EIF3H,EIF1AX,EIF4A2
		Pathway	1268683	Activation of the mRNA upon binding of the cap-binding complex and eIFs, and subsequent binding to 43S	BioSystems: REACTOME	5.335e-07	0.001154	2.729e-05	0.0002253	14	65	RPS3,RPS5,RPS6,RPS15,RPS15A,RPS17,RPS19,RPS21,RPS23,RPS24,PABPC1,EIF3H,EIF1AX,EIF4A2
		Pathway	1339121	Ion homeostasis	BioSystems: REACTOME	5.424e-07	0.001173	2.729e-05	0.0002253	13	56	PRKACA,ATP1A1,ATP1A2,ATP2A2,ATP2B1,ATP2B2,AHCYL1,SRI,ITPR2,CALM1,CALM2,CAMK2A,CAMK2B
		Pathway	1270303	Axon guidance	BioSystems: REACTOME	5.797e-07	0.001254	2.814e-05	0.0002323	50	554	CFL1,ACTG1,PFN2,AP2M1,CLTC,FGFR1,HSPA8,SDCBP,PLXNB1,CAP2,HSP90AA1,EZR,EVL,ANK2,ANK3,PPP2CA,ARRB1,PRKACA,FYN,MYH10,GAP43,MYO10,SPTAN1,SPTBN1,PSMC6,NCAM1,PSMD5,PSMD11,NRP2,DLG1,DLG4,DNM1,RAC1,RBX1,KRAS,CACNB1,RAP1A,RAP1B,CALM1,CALM2,KALRN,CAMK2A,CAMK2B,GRB2,RASGEF1A,PIP5K1C,PEBP1,PAK2,SPRED1,CDC42
		Pathway	1269584	Opioid Signalling	BioSystems: REACTOME	5.854e-07	0.001266	2.814e-05	0.0002323	16	85	PDE4B,PDE1B,ADCY1,GRK2,PPP1R1B,PPP2CA,PRKACA,PRKAR1A,AHCYL1,ITPR2,GNG12,PLCB1,GNB2,CALM1,CALM2,CAMK4
		Pathway	1269480	Signaling by VEGF	BioSystems: REACTOME	6.473e-07	0.0014	3.044e-05	0.0002513	36	341	AKT1,FGFR1,HSP90AA1,CYFIP2,PPP2CA,ARRB1,ELMO2,PRKACA,PRKCZ,CTNNB1,FYN,AHCYL1,SPTAN1,SPTBN1,PSMC6,NCAM1,PSMD5,PSMD11,NRP2,ITPR2,DLG4,RAC1,RBX1,KRAS,RAP1A,RAP1B,CALM1,CALM2,CAMK2A,CAMK2B,GRB2,RASGEF1A,PEBP1,PAK2,SPRED1,CDC42
		Pathway	1269483	VEGFA-VEGFR2 Pathway	BioSystems: REACTOME	1.03e-06	0.002229	4.643e-05	0.0003833	35	333	AKT1,FGFR1,HSP90AA1,CYFIP2,PPP2CA,ARRB1,ELMO2,PRKACA,PRKCZ,CTNNB1,FYN,AHCYL1,SPTAN1,SPTBN1,PSMC6,NCAM1,PSMD5,PSMD11,ITPR2,DLG4,RAC1,RBX1,KRAS,RAP1A,RAP1B,CALM1,CALM2,CAMK2A,CAMK2B,GRB2,RASGEF1A,PEBP1,PAK2,SPRED1,CDC42
		Pathway	1269291	DAG and IP3 signaling	BioSystems: REACTOME	1.072e-06	0.002318	4.73e-05	0.0003906	10	34	PDE1B,ADCY1,GRK2,PRKACA,PRKAR1A,AHCYL1,ITPR2,CALM1,CALM2,CAMK4
[truncated: 265 more rows]
